# Supplementary material for: Protein tyrosine phosphatase inactivation by electrophilic tyrosine modification
Source: Royal Society of Chemistry journal article supplement (doi:10.1039/d5sc07398g), 2026-01-01

## SUPPORTING INFORMATION

### Protein tyrosine phosphatase inactivation by electrophilic tyrosine modification

Madeleine L. Ware<sup>1</sup>, David M. Leace<sup>1,2</sup>, Zihan Qu<sup>3</sup>, Quentin Schaefer<sup>1</sup>, Sagar D. Vaidya<sup>1</sup>, Mikayla L. Horvath<sup>1</sup>, Zhihong Li<sup>1</sup>, Yunpeng Bai<sup>4</sup>, Zhong-Yin Zhang<sup>\*3,4</sup> and Ku-Lung Hsu<sup>\*1</sup>

<sup>1</sup>Department of Chemistry, University of Texas at Austin, Austin, TX, 78712, USA

<sup>2</sup>Department of Pharmacology, University of Virginia School of Medicine, Charlottesville, VA, 22908, USA.

<sup>3</sup>James Tarpo Jr. and Margaret Tarpo Department of Chemistry, <sup>4</sup>Borch Department of Medicinal Chemistry and Molecular Pharmacology, Purdue University, West Lafayette, IN, 47907, USA

\*Corresponding author. Email: zhang-zy@purdue.edu (Z.-Y.Z.); ken.hsu@austin.utexas.edu (K.-L.H.)

### Contents

1. Supporting Figures
2. Chemical Synthesis
3. Biological Methods
4. References
5. Appendix

## 1. SUPPORTING FIGURES

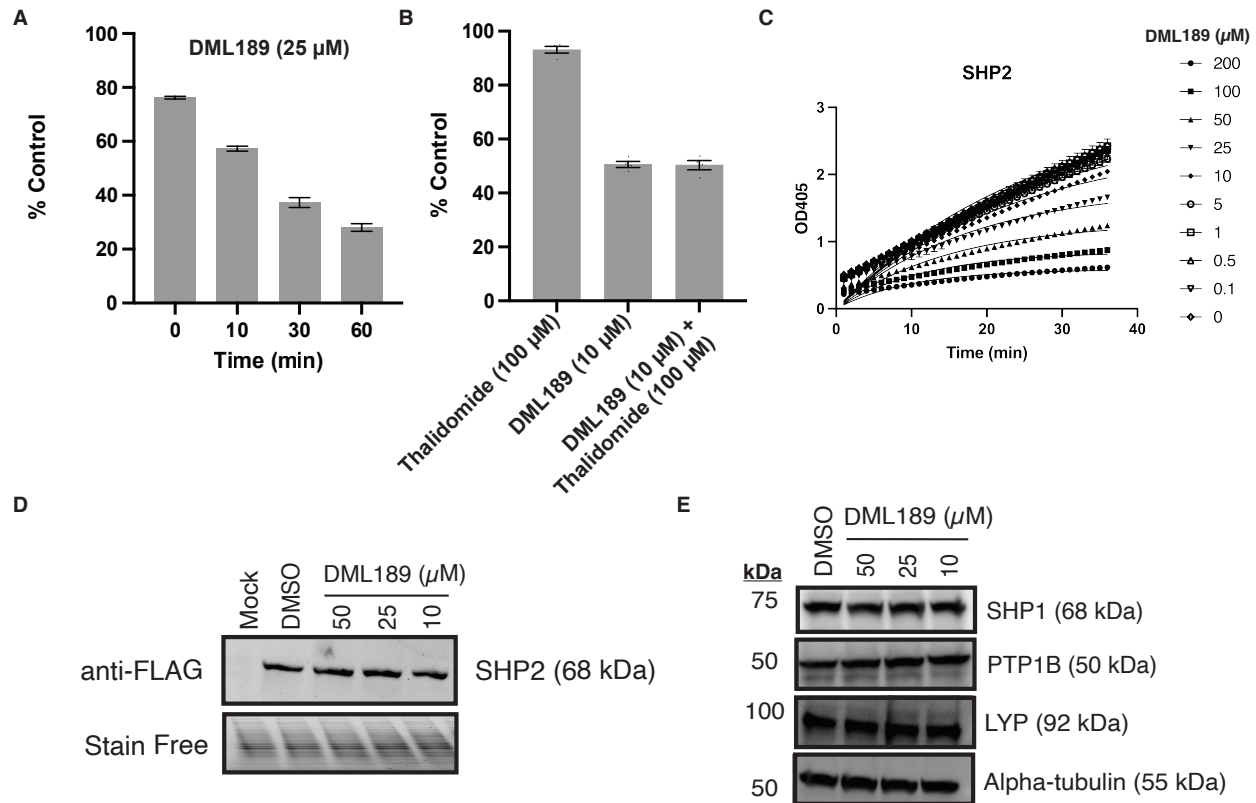

**Supplementary Figure 1.** (A) Time dependent inhibition (% vehicle control) of SHP2 by DML189 (25  $\mu$ M). Data shown as mean  $\pm$  SEM of % control from n =3 replicates. (B) SHP2 activity after treatment with thalidomide alone (100  $\mu$ M, 1 h) and after co-incubation with DML189 (10  $\mu$ M) and thalidomide (100  $\mu$ M, 1 h). Data shown as mean  $\pm$  SEM of % control from n =4 replicates. (C) SHP2 and pNPP (20 mM) reaction progress curves with DML189 (200-0.1  $\mu$ M) treatment. Data are from n=3 replicates. (D) Western blot analysis of full length SHP2 protein levels after DML189 dose response (0-50  $\mu$ M, 24 h) in live HEK 293T cells overexpressing recombinant SHP2. (E) Western blot analysis of SHP1, PTP1B, and LYP protein levels after DML189 treatment (0-50  $\mu$ M, 24 h) in live Jurkat cells.

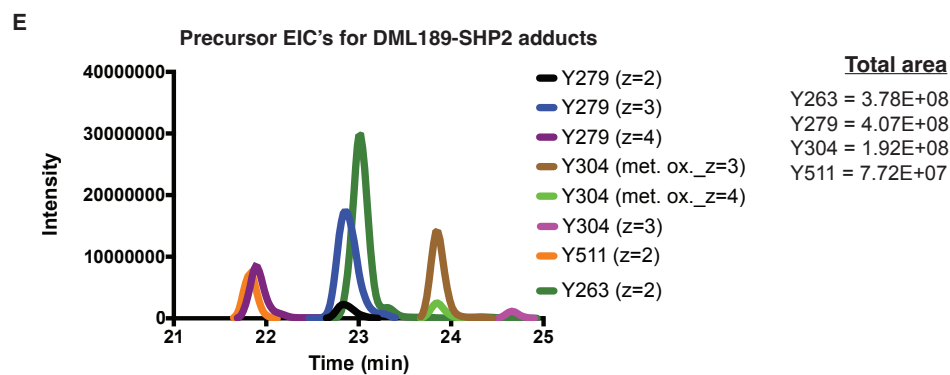

**Supplementary Figure 2.** (A) Bar plot of % protein sequence coverage of PTP catalytic domains after trypsin digest and bottom-up LC-MS/MS analysis. (B-D) HCD spectra for SHP2-DML189 adducts at Y263, Y304 and Y511. Peptide spectra met the following quality control; Byonic score  $\geq 300$ ,  $-5 \leq \text{ppm err} \leq 5$ , delta mod score  $\geq 20$ . (E) Extracted ion chromatograms (EICs) of detected DML189-SHP2 precursor adducts from a single sample injection. Precursor areas were integrated using Proteome Discoverer 3.0.



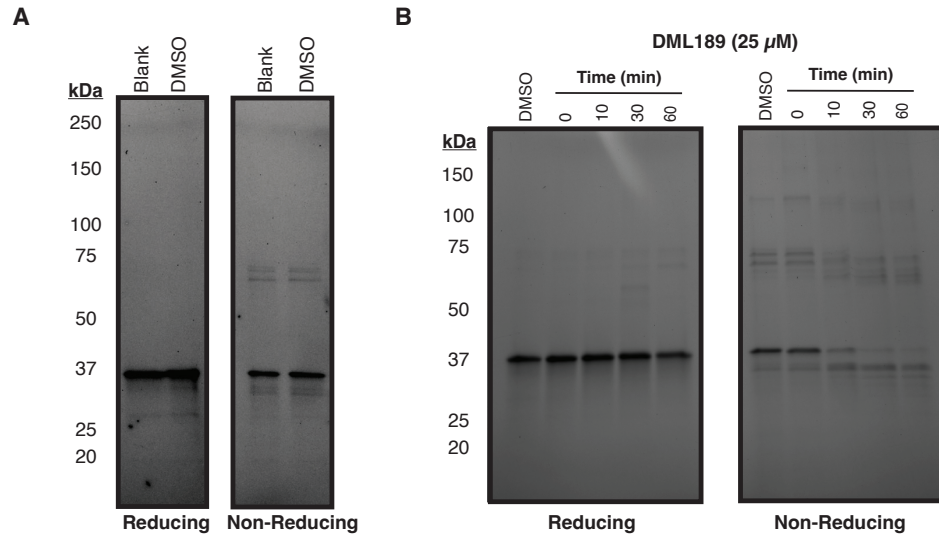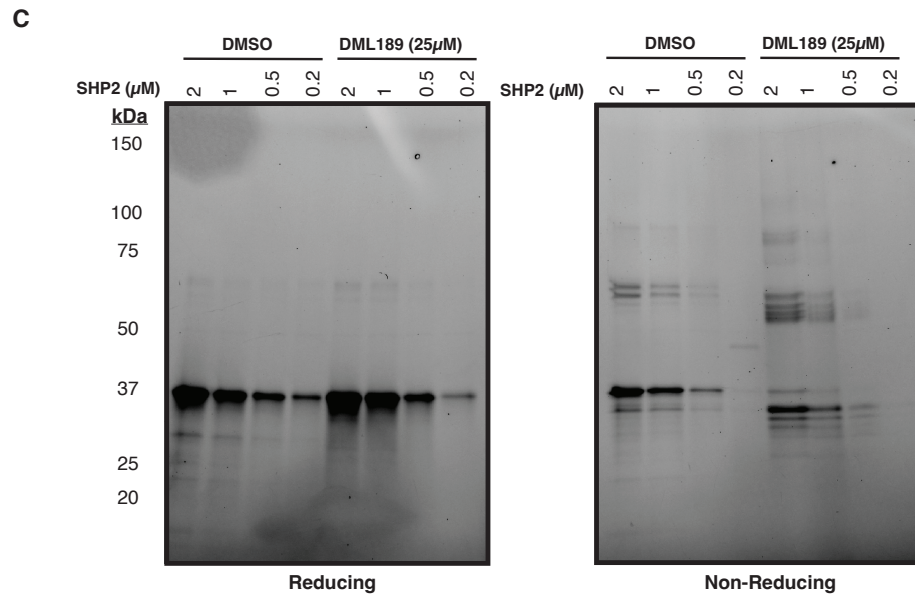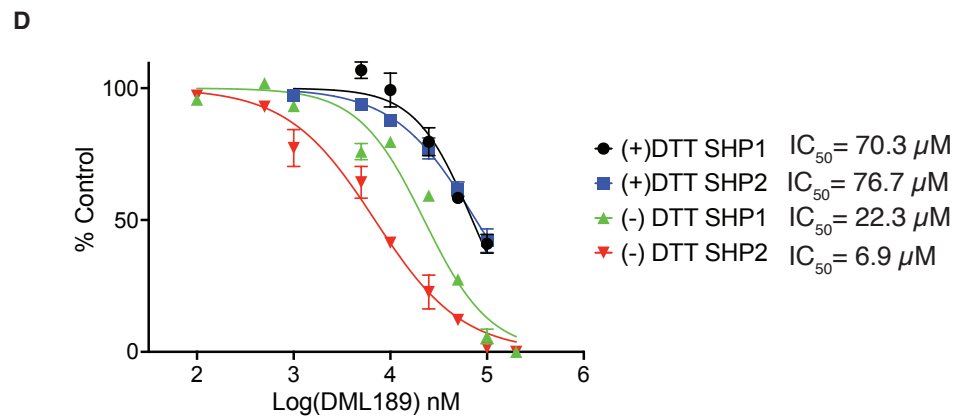

**Supplementary Figure 3.** (A) SHP2 was incubated with and without DMSO for 1 h at room temperature and analyzed by reducing and non-reducing SDS-PAGE. (B) Reducing and non-reducing SDS-PAGE analysis of DML189 (25  $\mu$ M) incubated with SHP2 for 0, 10, 30, and 60 min. (C) Reducing and non-reducing SDS-PAGE analysis of DML189 (25  $\mu$ M) incubated with the indicated concentrations of SHP2. (D) Reversal of DML189 inhibitory activity against SHP1 and SHP2 after treatment with DTT (5 mM, 30 min) as measured by pNPP substrate assay.

## 2. CHEMICAL SYNTHESIS

### General synthetic procedure for 1, 2, 3 sulfonyl triazoles

Synthesis was performed as previously described.<sup>1</sup>

### General synthetic procedure for 1, 2, 4 sulfonyl triazoles

Synthesis was performed as previously described.<sup>2</sup>

### Scheme 1. Synthesis of DML189

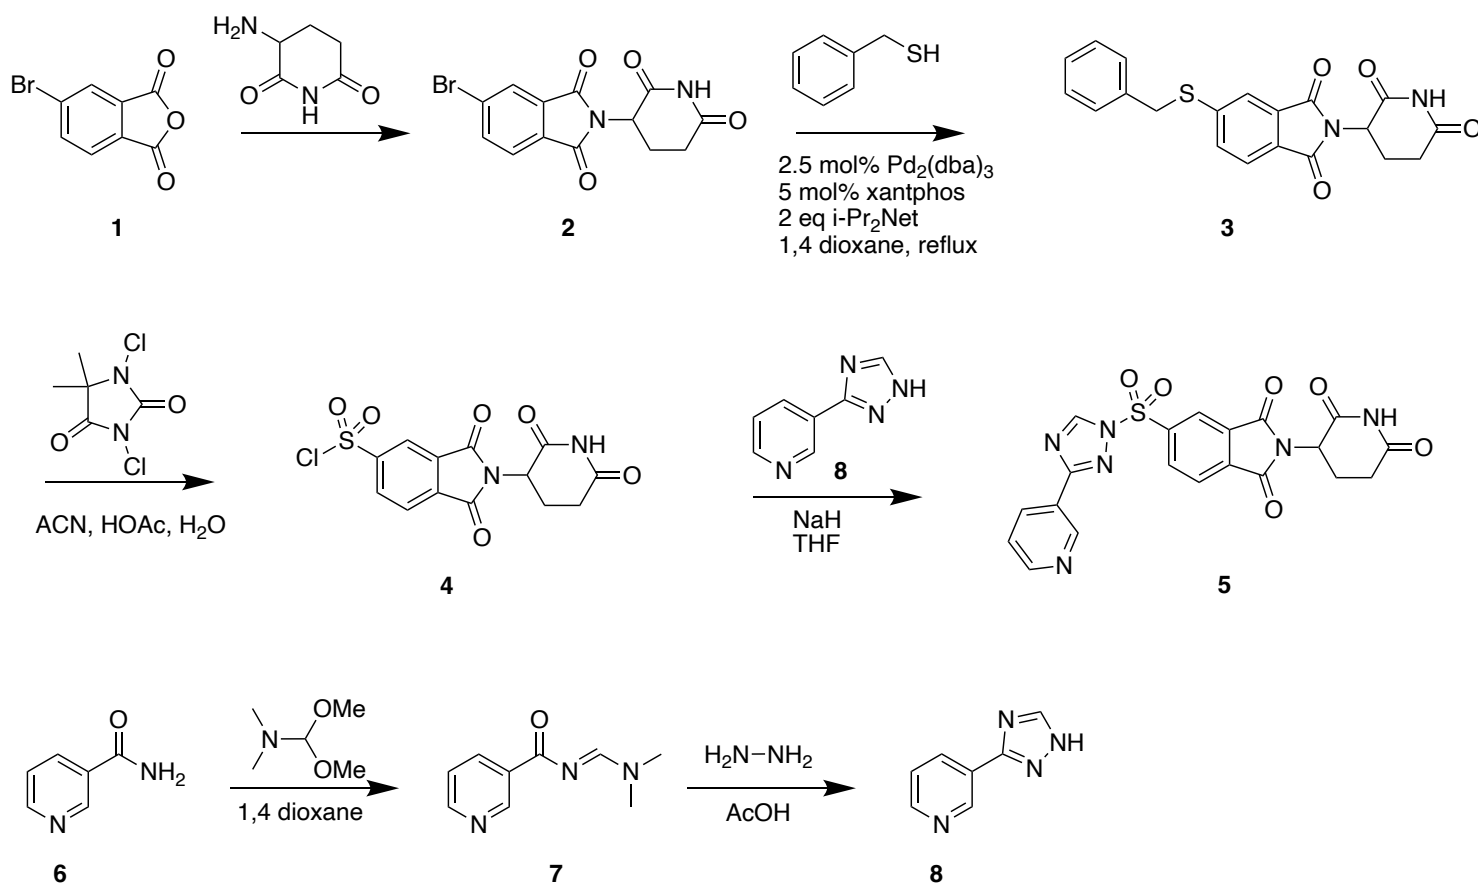

### **5-Bromo-2-(2,6-dioxo-3-piperidinyl)-1*H*-isoindole-1,3(2*H*)-dione (2)**

10 g (60.8 mmol, 1.2 equiv) of aminoglutarimide HCl was dissolved in 550 mL of glacial acetic acid followed by addition of 11.5 g (50.7 mmol, 1 equiv) of bromo phthalic anhydride **1**. Next, 17.8 mL (127.7 mmol, 2.1 equiv) of triethylamine was added slowly, and the mixture was heated to reflux for 2h and monitored for starting material depletion. At completion, the reaction was cooled and poured onto ice. The precipitate was filtered through a glass frit, washed with cold water, and dried to yield 15.3 g of a purple powder (75%).

### **1*H*-Isoindole-1,3(2*H*)-dione, 2-(2,6-dioxo-3-piperidinyl)-5-[(phenylmethyl)thio]- (3)<sup>3</sup>**

**2** (4.37g, 13 mmol, 1 equiv), benzyl mercaptan (1.53 mL, 91 mmol, 7 equiv), Pd<sub>2</sub>(dba)<sub>3</sub> (299 mg, 0.325 mmol, 0.025 equiv), xantphos (377 mg, 0.65 mmol, 0.05 equiv), and *i*-Pr<sub>2</sub>Net (4.6 mL, 26 mmol, 2 equiv) were dissolved in 27 mL of 1,4 dioxane and heated to reflux overnight. The next morning, the reaction mixture was cooled and dried on celite. The material was loaded on a biotage column and eluted with 0-50% EtOAc/DCM. The product was collected, precipitated, and washed with DCM to yield an off white solid (3.37g, 66% yield).

### **1*H*-Isoindole-5-sulfonyl chloride, 2-(2,6-dioxo-3-piperidinyl)-2,3-dihydro-1,3-dioxo- (4)<sup>4</sup>**

**3** (1g, 2.5 mmol, 1 equiv), acetic acid (0.94 mL), and water (0.625 mL) were added to 25 mL of ACN and cooled to -10 °C. DCDMH (0.99g, 5 mmol, 2 equiv) was then added slowly. After 1 hour the reaction mixture was diluted with 25 mL of DCM and cooled to 0°C. 25 mL NaHCO<sub>3</sub> was then added, and the solution was stirred for 10 minutes. The organic layer was then extracted, washed with brine, dried over Na<sub>2</sub>SO<sub>4</sub>, concentrated, precipitated, and filtered. After washing with cold DCM, the product was obtained as a bright white powder. H-NMR showed the product with presence of the hydrolyzed sulfonic acid.

### **3-(1*H*-1,2,4-Triazol-5-yl)pyridine (8)**

Synthesis was performed as previously described.<sup>5</sup>

### **2-(2,6-Dioxopiperidin-3-yl)-5-((3-(pyridine-3-yl)-1*H*-1,2,4-triazol-1-yl)sulfonyl)isoindoline-1,3-dione (5, DML189)**

To a flame dried flask was dissolved 1, 2, 4 triazole **8** (82 mg, 0.56 mmol, 1 equiv) in 2.5 mL of dry THF. The solution was cooled to 0° C and NaH (22.4 mg, 0.56 mmol, 1 equiv) was added. The reaction was stirred for 30 minutes after which sulfonyl chloride **4** (200 mg, 0.56 mmol, 1 equiv) was added and the reaction was brought to room temperature and stirred overnight. The next morning, the precipitate was filtered, loaded onto celite, and purified with 0-20% MeOH/DCM on a biotage to yield a white solid (170 mg, 65% yield).

### 3. BIOLOGICAL METHODS

#### Purification of PTP catalytic domains

The cDNA encoding the catalytic domain of SHP1 (residues 245-543) was amplified by PCR and subcloned into pET21a(+) bacterial expression vector to allow expression of N-terminal His-tagged proteins. *E. coli* BL21(DE3) (Novagen) was used as an expression host and the induction of protein expression was carried out in LB Broth with 1 mM IPTG at 18 °C overnight. Cell pellets were stored at –80 °C for subsequent protein purification. Frozen cell pellets were lysed by sonication in 40 mL cold lysis buffer (50 mM Tris-HCl, pH 8.0, 150 mM NaCl, 5 mM imidazole, and 1 mM PMSF) per liter cell pellet. Cell lysates were clarified by centrifugation using a Beckman JA-18 rotor for 15 min at 5308 x g. The supernatant was incubated with HisPur Ni-NTA resin (Thermo Scientific) for 2 h and then packed onto a column and washed with 50 resin volume of buffer A (50 mM Tris-HCl, pH 8.0, 500 mM NaCl, 5 mM imidazole). The His-tagged protein was eluted with Buffer B (50 mM Tris-HCl, pH=8.0, 500 mM NaCl, 300 mM imidazole). Pooled His-protein-containing fractions were concentrated, loaded onto a HiLoad 26/600 Superdex 75 column (GE Healthcare Biosciences) and eluted with storage buffer (50 mM Tris-HCl, pH 8.0, 150 mM NaCl, 1 mM DTT, 10% glycerol). The purity of the protein was determined to be >95% by SDS-PAGE and Coomassie staining. The protein was aliquoted and stored at –80 °C. The catalytic domain of SHP2, PTP1B, and LYP were expressed and purified as described previously<sup>6-9</sup>.

#### PTP activity assay for SuTEx ligand screen

SuTEx compounds were dissolved in DMSO to make 50 mM stock and transferred to assay plate. Ligands (500 μM) were incubated with SHP1/SHP2/PTP1B/LYP (400 nM) in assay buffer (50 mM 3,3-dimethylglutaric acid, pH 7.0, 18 mM NaCl, 1 mM EDTA, 0.01% Triton X-100) for 30 min to allow covalent labeling. Excessive substrate para-nitrophenol phosphate (pNPP, 20 mM) was added to the mixture and incubated for 2/2/0.5/10 min, respectively to monitor remaining enzyme activity.

#### DML189 dose responses and time dependence assays

0.025 nmols of PTP catalytic domain in assay buffer (50 mM Tris, 150 mM NaCl, pH 7.5) was treated with ligands (0-200 μM, 1h). pNPP (20 mM) was then added and the enzyme activity monitored by reading absorbance at 405nm. The above assay was performed with SHP2 treated with DML189 (25μM) where enzyme activity was monitored at 0, 10, 30, and 60 min.

#### DML189-SHP2 $k_{inact}$ /K<sub>I</sub> calculation

DML189 (0-500 μM), PTP catalytic domain (0.025 nmols), and PNPP (20 mM) were incubated together in assay buffer (50 mM Tris, 150 mM NaCl, pH 7.5) and monitored for product formation using a plate reader for at least 30 min. Reaction progress curves were then fitted to the equation  $Y=(V_0/k_{obs})(1-\exp(-k_{obs}X))$  in order to obtain  $k_{obs}$  values for each concentration of DML189. These  $k_{obs}$  values are then plotted against compound concentration.  $k_{inact}/K_I$  was calculated using the equation  $k_{obs} = k_{inact}*[I]/(K_I+[I])$ .

#### Assessment of thalidomide activity against SHP2

0.025 nmols of SHP2 catalytic domain in assay buffer (50 mM Tris, 150 mM NaCl, pH 7.5) was treated with thalidomide (100  $\mu$ M, 1h) and enzyme activity was evaluated using pNPP (20 mM) as a substrate. Additionally, the above assay was performed after SHP2 was pre-incubated with thalidomide (100  $\mu$ M) followed by DML189 (10  $\mu$ M) for 1h at RT.

### **Testing DML189 degradative activity against PTPs**

HEK293T cells were transiently transfected with full length SHP2 using polyethylenimine (PEI). After 48h, cells were treated with DML189 (50, 25, 10  $\mu$ M) in serum free media for 24h. Cells were harvested and washed 3x in 1x DPBS. Jurkat cells were treated (DML189 (50, 25, 10  $\mu$ M), 10<sup>6</sup>/mL) and harvested to test for LYP, SHP1, and PTP1B degradation. Following whole cell lysis (50 mM Tris, 150 mM NaCl, pH 7.5, 1% Triton), lysates were normalized to 2 mg/mL and analyzed for PTP degradation via western blot: SHP2 (anti-FLAG, Sigma, Rabbit, 1:2500), SHP1 (proteintech, Cat No. 24546-1-AP, 1:2000), PTP1B (proteintech, Cat No. 11334-1-AP), LYP (proteintech, Cat No. 11783-1-AP, 1:500).

### **Docking**

A structure of SHP2 (PDB ID: 3ZM0) was obtained from PDB website. Residues within 10 Å of the binding site were defined as the docking pocket. Subsequently, compound was docked into this defined pocket using GOLD 5.1 with default parameters and 100 genetic algorithm (GA) runs. For each GA run, a maximum of 125,000 operations were performed. Docking was terminated when the top ten solutions had RMSD values within 1.5 Å. The resulting protein–ligand complexes were visualized using the PyMOL Molecular Graphics System (version 2.3.0).

### **Non-reducing / reducing SDS-PAGE of PTP catalytic domains**

Catalytic domains of PTPs (SHP1, SHP2, PTP1B or LYP (0.5 mg/mL) in assay buffer (50 mM Tris, 150 mM NaCl, pH 7.5) were treated for 1h at RT with DML189 (150  $\mu$ M) or DMSO. The samples were split in half and quenched with BME-containing or BME-free loading buffer and analyzed by stain free gel.

### **DML189 LIPT dose response on SHP2**

SHP2 in assay buffer (50 mM Tris, 150 mM NaCl, pH 7.5) at 0.132 mg/mL was treated for 1h at RT with DML189 (100-0.1  $\mu$ M) or DMSO. The samples were split in half and quenched with BME-containing or BME-free loading buffer and analyzed by stain free gel.

### **SHP2 dilution LIPT analysis with DML189**

Various concentrations of SHP2 (2-0.2  $\mu$ M) were treated with DMSO or DML189 (25  $\mu$ M) and analyzed by reducing/non-reducing SDS-PAGE followed by stain free imaging.

### **SHP2 thalidomide and H<sub>2</sub>O<sub>2</sub> LIPT response**

SHP2 in assay buffer (50 mM Tris, 150 mM NaCl, pH 7.5) at 0.132 mg/mL was treated at RT with thalidomide (100  $\mu$ M, 1h) or H<sub>2</sub>O<sub>2</sub> (500  $\mu$ M, 1h). The samples were split in half and quenched with BME-containing or BME-free loading buffer and analyzed by stain free gel.

### **DTT reversibility assay**

0.025 nmols SHP1 and SHP2 catalytic domain were treated with DML189 (0-100  $\mu$ M, 1h) in assay buffer (50 mM Tris, 150 mM NaCl, pH 7.5). After DML189 incubation, samples were treated with DTT (5 mM, 30 min) followed by PTP activity readout using pNPP (20 mM).

### **Sample preparation for DML189 adduct detection by LC-MS/MS**

1 nmol of SHP1, SHP2, LYP, and PTP1B catalytic domains were treated with DML189 (100  $\mu$ M, 1h, RT) in assay buffer (50 mM Tris, 150 mM NaCl, pH 7.4). Following treatment, samples were loaded onto a 10,000 Da MWCO filter and washed 3x with 25mM ammonium bicarbonate. After transfer to Eppendorf tubes, samples were reduced (DTT, 20 mM, 65°C, 15 min), alkylated (iodoacetamide, 40 mM, RT, 30 min), and trypsinized (3h, 37°C). Trypsin was quenched with 1 $\mu$ L acetic acid prior to injection (150 ng) on the LC-MS.

### **Sample preparation for crosslinking LC-MS/MS**

SHP1 and SHP2 (1 nmol) were treated with DML189 (75  $\mu$ M, 1h, RT) or DMSO and then immediately quenched with iodoacetamide (40mM, 30 min, RT) to prevent disulfide reshuffling. Samples were loaded onto a 10,000 Da MWCO filter and washed 3x with 25 mM ammonium bicarbonate. After washing, samples were trypsinized (1.5h, 37°C) and quenched with 1 $\mu$ L formic acid before injection onto the LC-MS.

### **LC-MS/MS acquisition and analysis for DML189 adduct detection on PTP catalytic domains**

Peptides from DML189 treated PTP's were evaluated by LC-MS/MS using a Vanquish Neo UHPLC coupled to an Orbitrap Eclipse Tribrid mass spectrometer. Peptides were separated on a 30 min gradient by reverse phase LC using 3  $\mu$ m C18 (20 cm) as follows: (A: 0.1% formic acid/H<sub>2</sub>O; B: 80% ACN, 0.1% formic acid in H<sub>2</sub>O): 0–1 min 15% B, 450 nL/min; 1–8.5 min 40% B, 300 nL/min; 8.5–16 min 60% B, 300 nL/min; 16–20 min 99% B, 300 nL/min; 20–30 min 1% B. Data were acquired using a top 20 ddMS2 method. MS1 spectra were acquired at 120K resolution with a max IT of 20 ms and MS2 spectra were taken with a normalized AGC of 50%, quadrupole isolation width of 1.6 m/z, and max IT of 100 ms. DML189 (+320.0181 Da) adducts on PTP domains were searched as modifications on tyrosine, lysine, histidine, and cysteine using Byonic. Peptides met the following quality criteria: PMI-Byonic Score  $\geq$  300, delta ppm err. 5, delta mod score  $\geq$  20.

### **Data acquisition and analysis for crosslinking LC-MS/MS.**

Non-reduced peptides from DML189 treated PTP's were evaluated by LC-MS/MS using a Vanquish Neo UHPLC coupled to an Orbitrap Eclipse Tribrid mass spectrometer. Peptides were separated on a 30 min gradient by reverse phase LC using 3  $\mu$ m C18 (20 cm) as follows: (A: 0.1% formic acid/H<sub>2</sub>O; B: 80% ACN, 0.1% formic acid in H<sub>2</sub>O): 0–1 min 15% B, 450 nL/min; 1–8.5 min 40% B, 300 nL/min; 8.5–16 min 60% B, 300 nL/min; 16–20 min 99% B, 300 nL/min; 20–30 min 1% B. Calibrated charge-state dependent ETD activation followed by a supplemental HCD at 30% CE was used to fragment disulfide-bound peptides. MS2 spectra were taken at 15k resolution, an absolute AGC of 1E5 and maximum injection time of 200 ms. Disulfide linked peptides were identified using Byonic S-S Xlink node (S-S cleavable linkage, –2.015650 Da) with the following quality control criteria: PMI-Byonic Score  $\geq$  300, delta ppm err. 5, and Xlink score of >100.

#### 4. REFERENCES

1. A. M. Ciancone, K. W. Seo, M. Chen, A. L. Borne, A. H. Libby, D. L. Bai, R. E. Kleiner and K.-L. Hsu, Global Discovery of Covalent Modulators of Ribonucleoprotein Granules, *J Am Chem Soc*, 2023, **145**, 11056-11066.
2. J. W. Brulet, A. L. Borne, K. Yuan, A. H. Libby and K. L. Hsu, Liganding Functional Tyrosine Sites on Proteins Using Sulfur-Triazole Exchange Chemistry, *J Am Chem Soc*, 2020, **142**, 8270-8280.
3. T. Itoh and T. Mase, A General Palladium-Catalyzed Coupling of Aryl Bromides/Triflates and Thiols, *Org Lett*, 2004, **6**, 4587-4590.
4. Y.-M. Pu, A. Christesen and Y.-Y. Ku, A simple and highly effective oxidative chlorination protocol for the preparation of arenesulfonyl chlorides, *Tetrahedron Lett*, 2010, **51**, 418-421.
5. R. J. Grams, W. J. Wolfe, R. J. Seal, J. Veccia and K.-L. Hsu, Discovery and Optimization of a Covalent AKR1C3 Inhibitor, *J Med Chem*, 2025, **68**, 9465-9478.
6. M. Taing, Y. F. Keng, K. Shen, L. Wu, D. S. Lawrence and Z. Y. Zhang, Potent and highly selective inhibitors of the protein tyrosine phosphatase 1B, *Biochemistry*, 1999, **38**, 3793-3803.
7. Z. H. Yu, R. Y. Zhang, C. D. Walls, L. Chen, S. Zhang, L. Wu, S. Liu and Z. Y. Zhang, Molecular basis of gain-of-function LEOPARD syndrome-associated SHP2 mutations, *Biochemistry*, 2014, **53**, 4136-4151.
8. Y. He, S. Liu, A. Menon, S. Stanford, E. Oppong, A. M. Gunawan, L. Wu, D. J. Wu, A. M. Barrios, N. Bottini, A. C. Cato and Z. Y. Zhang, A potent and selective small-molecule inhibitor for the lymphoid-specific tyrosine phosphatase (LYP), a target associated with autoimmune diseases, *J Med Chem*, 2013, **56**, 4990-5008.
9. S. Grosskopf, C. Eckert, C. Arkona, S. Radetzki, K. Böhm, U. Heinemann, G. Wolber, J.-P. von Kries, W. Birchmeier and J. Rademann, Selective Inhibitors of the Protein Tyrosine Phosphatase SHP2 Block Cellular Motility and Growth of Cancer Cells in vitro and in vivo, *ChemMedChem*, 2015, **10**, 815-826.



## 5. APPENDIX

**A. Published sulfonyl triazole compounds used for PTP screening. Synthesis and characterization are reported in References [1, 2, 5]:**

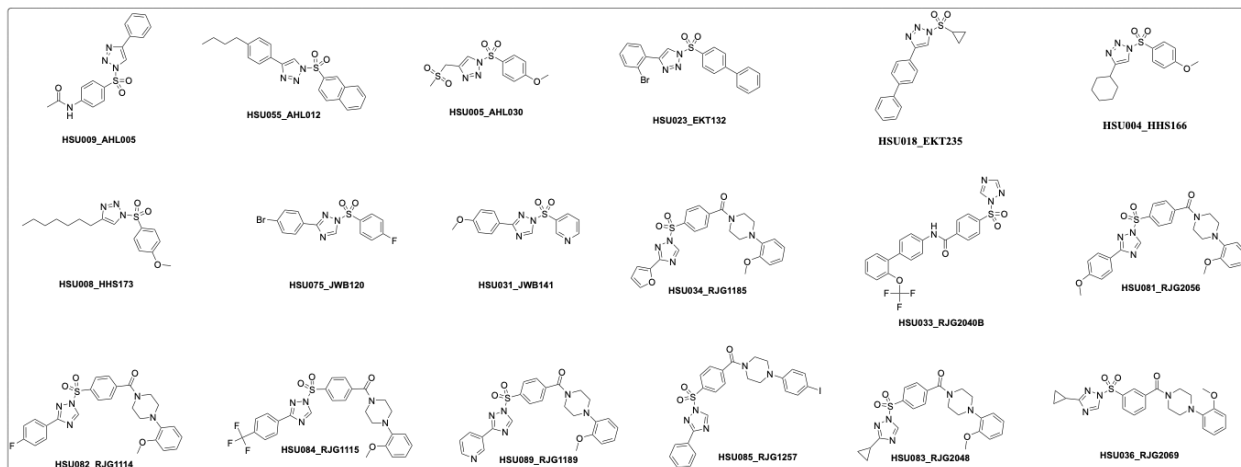

**B. Compound characterization of remaining sulfonyl-triazoles used in PTP screen:**

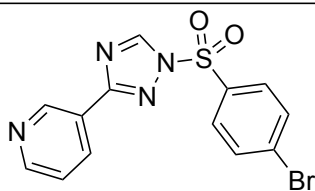

**HSU001-JWB179**

Chemical Formula:  $C_{13}H_{10}BrN_4O_2S$   
Exact Mass: 364.9708

**$^1H$  NMR** (800 MHz, DMSO- $D_6$ )  $\delta$  9.56 (s, 1H), 9.15 (d,  $J$  = 2.4 Hz, 1H), 8.70 (dd,  $J$  = 4.8, 1.7 Hz, 1H), 8.33 (dt,  $J$  = 7.9, 1.9 Hz, 1H), 8.10 – 8.07 (m, 2H), 7.98 – 7.94 (m, 2H), 7.55 (dd,  $J$  = 7.9, 4.8 Hz, 1H).

**$^{13}C$  NMR** (201 MHz, DMSO- $D_6$ )  $\delta$  162.06, 151.36, 148.15, 147.26, 134.34, 134.26, 133.47, 130.74, 130.24, 124.75, 124.23.

**HRMS** (ESI-TOF)  $m/z$ :  $[M + H]^+$  calculated for  $C_{13}H_{11}BrN_4O_2S$  364.9708, Found, 364.9695.

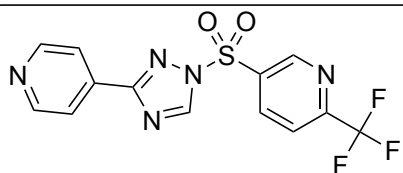

**HSU002\_JWB222**

Chemical Formula:  $C_{13}H_8F_3N_5O_2S$   
Exact Mass: 355.0351

**$^1H$  NMR** (800 MHz, DMSO- $D_6$ )  $\delta$  9.63 (s, 1H), 9.51 (d,  $J$  = 2.3 Hz, 1H), 8.88 (dd,  $J$  = 8.4, 2.4 Hz, 2H), 8.77 (d,  $J$  = 6.2 Hz, 2H), 8.28 (dd,  $J$  = 8.4, 0.8 Hz, 2H), 8.01 (d,  $J$  = 6.2 Hz, 2H).

**$^{13}C$  NMR** (201 MHz, DMSO- $D_6$ )  $\delta$  162.25, 151.35 (q,  $J$  = 34.8 Hz), 149.84, 149.37, 148.83, 147.17, 139.90, 136.66, 135.19, 122.35, 121.01.

**$^{19}F$  NMR** (376 MHz, acetone- $D_6$ )  $\delta$  -69.04 (s, 3F).

**HRMS** (ESI-TOF)  $m/z$ :  $[M + H]^+$  calculated for  $C_{13}H_9F_3N_5O_2S$  356.0424, Found, 356.0432.

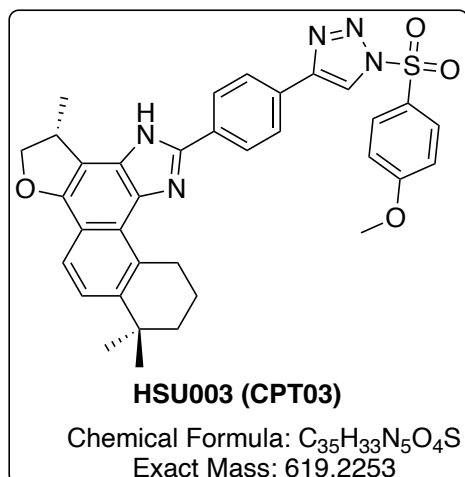

**<sup>1</sup>H NMR** (800 MHz, Acetone-D<sub>6</sub>) δ 9.11 (s, 1H), 8.41 (s, 1H), 8.24 (d, *J* = 9.2 Hz, 2H), 8.17 (d, *J* = 8.0 Hz, 2H), 7.92 (s, 1H), 7.61 (d, *J* = 8.6 Hz, 1H), 7.33 (d, *J* = 9.2 Hz, 2H), 4.97 (s, 1H), 4.51 (s, 1H), 4.03 (s, 3H), 2.14 (p, *J* = 2.2 Hz, 2H), 2.10 (m, 3H), 1.92 – 1.85 (m, 2H), 1.58 (d, *J* = 6.9 Hz, 3H), 1.49 (s, 3H), 1.48 (s, 3H).

**<sup>13</sup>C NMR** (201 MHz, Acetone-D<sub>6</sub>) δ 166.62, 153.99, 147.62, 147.01, 144.11, 133.26, 132.04, 132.00, 130.31, 127.92, 127.27, 127.09, 123.93, 123.86, 121.25, 121.18, 120.61, 118.14, 116.34, 116.25, 111.13, 79.84, 79.76, 56.69, 39.75, 37.52, 35.19, 32.33, 31.75, 20.69, 19.99.

**HRMS** (ESI-TOF) *m/z*: [M + H]<sup>+</sup> calculated for C<sub>35</sub>H<sub>34</sub>N<sub>5</sub>O<sub>4</sub>S 620.2332, Found, 620.2302.

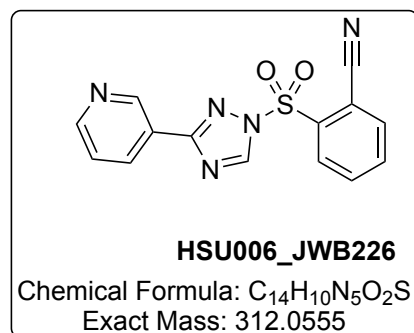

**<sup>1</sup>H NMR** (400 MHz, Acetone-D<sub>6</sub>) δ 9.33 (s, 1H), 9.22 (s, 1H), 8.69 (d, *J* = 4.8 Hz, 1H), 8.55 (d, *J* = 7.6 Hz, 1H), 8.35 (d, *J* = 7.9 Hz, 1H), 8.21 (d, *J* = 7.3 Hz, 1H), 8.13 (m, 2H), 7.50 (dd, *J* = 8.0, 4.8 Hz, 1H).

**<sup>13</sup>C NMR** (100 MHz, Acetone-D<sub>6</sub>) δ 164.00, 152.53, 148.82, 148.81, 137.57, 137.20, 135.21, 134.81, 132.71, 125.95, 124.67, 115.33, 112.11.

**HRMS** (ESI-TOF) *m/z*: [M + H]<sup>+</sup> calculated for C<sub>14</sub>H<sub>11</sub>N<sub>5</sub>O<sub>2</sub>S 312.0555, Found, 312.0559.

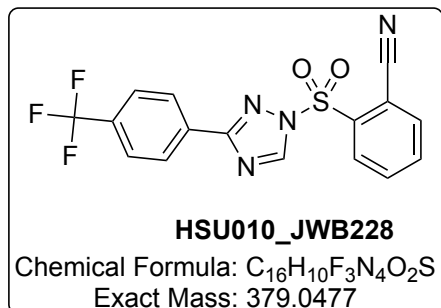

**$^1H$  NMR** (800 MHz, DMSO- $D_6$ )  $\delta$  8.65 (dd,  $J$  = 7.1, 3.9 Hz, 1H), 8.29 – 8.19 (m, 2H), 7.92 – 7.83 (m, 3H), 7.77 (dd,  $J$  = 7.6, 1.3 Hz, 1H), 7.64 (td,  $J$  = 7.7, 1.3 Hz, 1H), 7.49 (td,  $J$  = 7.6, 1.3 Hz, 1H).

**$^{13}C$  NMR** (201 MHz, DMSO- $D_6$ )  $\delta$  163.06, 150.38, 148.64, 146.04, 133.96, 132.25, 129.01, 127.36, 127.07, 126.48, 125.73(m, 1C), 125.70, 117.67, 108.95.

**$^{19}F$  NMR** (376 MHz, Acetone- $D_6$ )  $\delta$  -63.44 (s, 3F).

**HRMS** (ESI-TOF)  $m/z$ :  $[M + H]^+$  calculated for  $C_{16}H_{10}F_3N_4O_2S$  379.0471, Found, 379.0470.

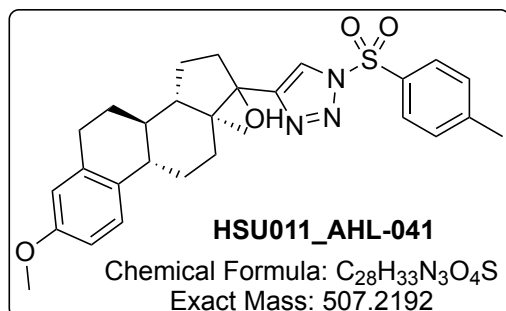

**$^1H$  NMR** (400 MHz, Acetone- $D_6$ )  $\delta$  8.34 (s, 1H), 8.04 (d,  $J$  = 8.3 Hz, 2H), 7.55 (d,  $J$  = 8.1 Hz, 2H), 7.09 (d,  $J$  = 8.5 Hz, 1H), 6.64 (dd,  $J$  = 8.5, 2.7 Hz, 1H), 6.59 (s, 1H), 3.72 (s, 3H), 3.40 (q,  $J$  = 7.0 Hz, 1H), 3.11 (br s, 1H), 2.80 (m, 1H), 2.45 (s, 3H), 2.43 – 2.26 (m, 1H), 2.21 – 2.06 (m, 2H), 2.00 – 1.79 (m, 3H), 1.80 – 1.67 (m, 1H), 1.63 – 1.51 (m, 1H), 1.45 (q,  $J$  = 11.4 Hz, 1H), 1.38 – 1.23 (m, 2H), 1.11 (t,  $J$  = 7.0 Hz, 2H), 1.04 (s, 3H), 0.55 (td,  $J$  = 12.9, 4.2 Hz, 1H).

**$^{13}C$  NMR** (100 MHz, Acetone- $D_6$ )  $\delta$  158.49, 155.97, 148.47, 138.49, 134.43, 133.05, 131.50, 129.25, 126.99, 122.82, 114.39, 112.21, 82.57, 66.11, 55.27, 49.22, 48.19, 44.37, 40.47, 38.41, 33.80, 28.25, 27.06, 24.42, 21.67, 15.61, 14.72.

**HRMS** (ESI-TOF)  $m/z$ :  $[M + H]^+$  calculated for  $C_{28}H_{34}N_3O_4S$  508.2265, Found, 508.2257.

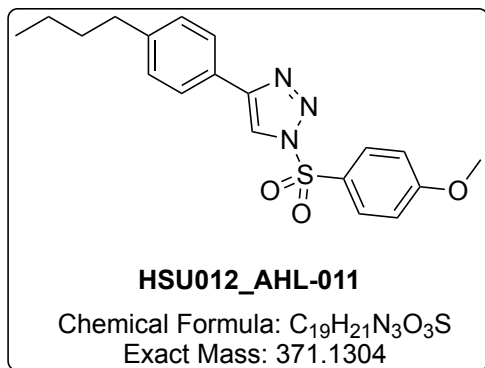

**<sup>1</sup>H NMR** (400 MHz, DMSO-D<sub>6</sub>) δ 9.31 (s, 1H), 8.10 (d, *J* = 9.1 Hz, 2H), 7.83 (d, *J* = 8.4 Hz, 2H), 7.29 (d, *J* = 8.5 Hz, 2H), 7.25 (d, *J* = 9.1 Hz, 2H), 3.87 (s, 3H), 2.60 (t, *J* = 7.6 Hz, 2H), 1.56 (p, *J* = 7.6 Hz, 2H), 1.29 (dq, *J* = 14.3, 7.2 Hz, 2H), 0.89 (t, *J* = 7.3 Hz, 3H).

**<sup>13</sup>C NMR** (151 MHz, DMSO-D<sub>6</sub>) δ 165.28, 147.03, 143.47, 130.99, 128.99, 126.21, 126.15, 125.79, 120.73, 115.77, 56.26, 34.61, 32.98, 21.74, 13.80.

**HRMS** (ESI-TOF) *m/z*: [M + H]<sup>+</sup> calculated for C<sub>19</sub>H<sub>22</sub>N<sub>3</sub>O<sub>3</sub>S 372.1376, Found, 372.1369.

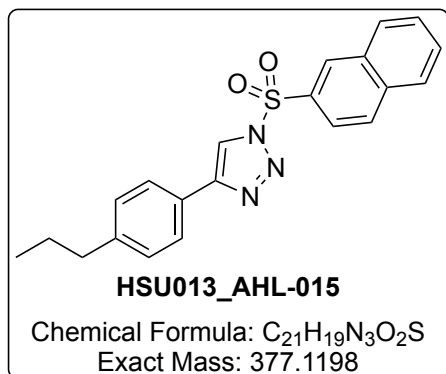

**<sup>1</sup>H NMR** (400 MHz, DMSO-D<sub>6</sub>) δ 9.41 (s, 1H), 8.99 (d, *J* = 2.1 Hz, 1H), 8.33 (d, *J* = 8.1 Hz, 1H), 8.26 (d, *J* = 8.9 Hz, 1H), 8.16 – 8.08 (m, 1H), 8.05 (dd, *J* = 8.8, 2.1 Hz, 1H), 7.88 – 7.80 (m, 3H), 7.77 (ddd, *J* = 8.1, 7.0, 1.3 Hz, 1H), 7.28 (d, *J* = 8.1 Hz, 2H), 2.56 (t, *J* = 7.5 Hz, 2H), 1.58 (h, *J* = 7.4 Hz, 2H), 0.87 (t, *J* = 7.3 Hz, 3H).

**<sup>13</sup>C NMR** (100 MHz, Acetone-D<sub>6</sub>) δ 148.31, 144.50, 136.90, 134.02, 132.87, 131.88, 131.49, 131.42, 130.75, 129.85, 129.29, 129.03, 127.55, 126.76, 122.85, 120.91, 38.26, 25.14, 13.95.

**HRMS** (ESI-TOF) *m/z*: [M + H]<sup>+</sup> calculated for C<sub>21</sub>H<sub>20</sub>N<sub>3</sub>O<sub>2</sub>S 378.1271, Found, 378.1272.

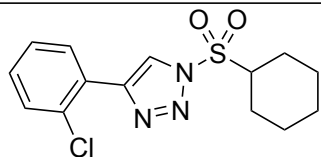

**HSU014\_EKT116**

Chemical Formula:  $C_{14}H_{16}ClN_3O_2S$

Exact Mass: 325.0652

**$^1H$  NMR** (400 MHz, DMSO- $D_6$ )  $\delta$  9.03 (s, 1H), 8.04 (dd,  $J$  = 6.7, 2.8 Hz, 1H), 7.64 (dd,  $J$  = 7.2, 2.1 Hz, 1H), 7.57 – 7.46 (m, 2H), 4.10 (tt,  $J$  = 11.9, 3.6 Hz, 1H), 1.99 (d,  $J$  = 11.0 Hz, 2H), 1.80 (d,  $J$  = 13.2 Hz, 2H), 1.60 (d,  $J$  = 13.0 Hz, 1H), 1.45 (m, 2H), 1.31 (m, 2H), 1.13 (m, 1H).

**$^{13}C$  NMR** (151 MHz, DMSO- $D_6$ )  $\delta$  143.17, 131.21, 130.70, 130.46, 130.35, 127.71, 127.46, 124.94, 63.41, 25.46, 24.19, 23.91.

**HRMS** (ESI-TOF)  $m/z$ :  $[M + H]^+$  calculated for  $C_{14}H_{17}ClN_3O_2S$  326.0725, Found, 326.0721.

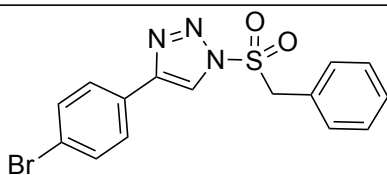

**HSU015\_EKT151**

Chemical Formula:  $C_{15}H_{12}BrN_3O_2S$

Exact Mass: 376.9834

**$^1H$  NMR** (400 MHz,  $CDCl_3$ )  $\delta$  7.78 (s, 1H), 7.58 (q,  $J$  = 8.5 Hz, 4H), 7.36 (t,  $J$  = 7.4 Hz, 1H), 7.29 (t,  $J$  = 7.3 Hz, 2H), 7.12 (d,  $J$  = 7.4 Hz, 2H), 4.87 (s, 2H).

**$^{13}C$  NMR** (100 MHz, DMSO- $D_6$ )  $\delta$  145.32, 132.07, 130.88, 129.45, 128.82, 128.07, 127.77, 126.30, 122.79, 122.15, 60.07.

**HRMS** (ESI-TOF)  $m/z$ :  $[M + H]^+$  calculated for  $C_{15}H_{12}BrN_3O_2S$  377.9906, Found, 377.9888.

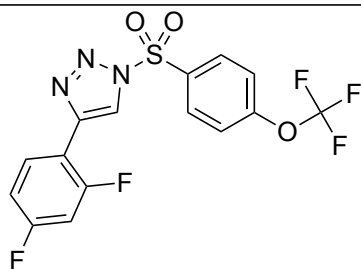

**HSU017\_EKT165**

Chemical Formula:  $C_{15}H_8F_5N_3O_3S$

Exact Mass: 405.0207

**$^1H$  NMR** (400 MHz, Acetone- $D_6$ )  $\delta$  8.82 (d,  $J$  = 2.0 Hz, 1H), 8.42 (d,  $J$  = 7.7 Hz, 2H), 8.23 (q,  $J$  = 8.7 Hz, 1H), 7.72 (d,  $J$  = 9.0 Hz, 2H), 7.40 – 7.02 (m, 2H).

**<sup>13</sup>C NMR** (100 MHz, Acetone-D<sub>6</sub>) δ 164.08 (d, *J* = 237.5 Hz), 160.47 (dd, *J* = 251.3, 12.0 Hz), 155.07 (d, *J* = 2.0 Hz), 141.23, 135.35, 132.45, 130.31 (dd, *J* = 10.0, 4.6 Hz), 123.33 (d, *J* = 11.7 Hz), 122.82, 121.06 (d, *J* = 258.8 Hz), 114.63 (d, *J* = 13.4 Hz), 113.13 (dd, *J* = 21.9, 3.6 Hz), 105.30 (t, *J* = 26.0 Hz).

**<sup>19</sup>F NMR** (376 MHz, Acetone-D<sub>6</sub>) δ -58.51 (s, 3F), -109.77 – -110.07 (m, 1F), -110.25 – -110.58 (m, 1F).

**HRMS** (ESI-TOF) *m/z*: [M + H]<sup>+</sup> calculated for C<sub>15</sub>H<sub>9</sub>F<sub>5</sub>N<sub>3</sub>O<sub>3</sub>S 406.0279, Found, 406.0281.

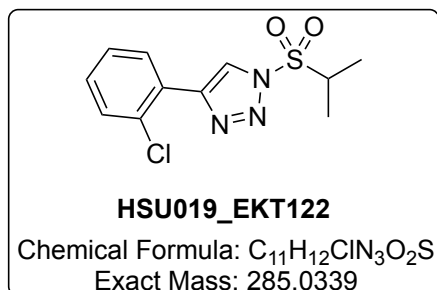

**<sup>1</sup>H NMR** (400 MHz, CDCl<sub>3</sub>) δ 8.69 (s, 1H), 8.26 (dd, *J* = 7.8, 2.5 Hz, 1H), 7.50 (d, *J* = 8.0 Hz, 1H), 7.42 (t, *J* = 7.5 Hz, 1H), 7.35 (td, *J* = 7.6, 1.4 Hz, 1H), 3.90 (hept, *J* = 7.2 Hz, 1H), 1.49 (s, 3H), 1.47 (s, 3H).

**<sup>13</sup>C NMR** (100 MHz, DMSO-D<sub>6</sub>) δ 143.20, 131.28, 130.75, 130.53, 130.34, 127.73, 127.49, 125.15, 56.99, 15.58.

**HRMS** (ESI-TOF) *m/z*: [M + H]<sup>+</sup> calculated for C<sub>11</sub>H<sub>13</sub>ClN<sub>3</sub>O<sub>2</sub>S 286.0412, Found, 286.0400.

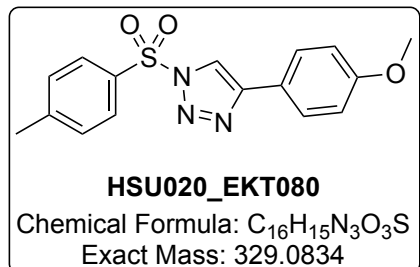

**<sup>1</sup>H NMR** (400 MHz, DMSO-D<sub>6</sub>) δ 8.22 (s, 1H), 7.78 (d, *J* = 8.7 Hz, 2H), 7.48 (d, *J* = 8.1 Hz, 2H), 7.12 (d, *J* = 7.9 Hz, 2H), 7.02 (d, *J* = 8.8 Hz, 2H), 3.79 (s, 3H), 2.29 (s, 3H).

**<sup>13</sup>C NMR** (151 MHz, DMSO-D<sub>6</sub>) δ 160.81, 151.47, 147.06, 137.31, 132.10, 130.65, 128.21, 128.12, 120.05, 114.67, 55.35, 21.21.

**HRMS** (ESI-TOF) *m/z*: [M + H]<sup>+</sup> calculated for C<sub>16</sub>H<sub>16</sub>N<sub>3</sub>O<sub>3</sub>S 364.0907, Found, 364.0907.

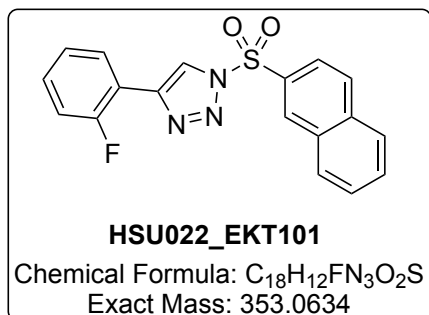

**<sup>1</sup>H NMR** (400 MHz, CDCl<sub>3</sub>) δ 8.79 (s, 1H), 8.55 (d, *J* = 3.4 Hz, 1H), 8.25 (t, *J* = 7.6 Hz, 1H), 8.02 (m, 3H), 7.92 (d, *J* = 8.3 Hz, 1H), 7.72 (t, *J* = 7.5 Hz, 1H), 7.67 (t, *J* = 7.5 Hz, 1H), 7.34 (q, *J* = 6.8 Hz, 1H), 7.23 (t, *J* = 7.6 Hz, 1H), 7.19 – 7.10 (m, 1H).

**<sup>13</sup>C NMR** (100 MHz, DMSO-D<sub>6</sub>) δ 159.98, 157.50, 140.72 (d, *J* = 2.3 Hz), 135.66, 131.96, 131.54, 131.33, 131.11 (d, *J* = 8.5 Hz), 130.92, 130.75, 130.03, 128.53, 128.14, 125.12 (d, *J* = 3.4 Hz), 123.32 (d, *J* = 10.4 Hz), 121.89, 116.24 (d, *J* = 21.0 Hz).

**<sup>19</sup>F NMR** (376 MHz, Acetone-D<sub>6</sub>) δ -114.71 (dtd, *J* = 11.4, 8.0, 3.8 Hz, 1F).

**HRMS** (ESI-TOF) *m/z*: [M + H]<sup>+</sup> calculated for C<sub>18</sub>H<sub>13</sub>FN<sub>3</sub>O<sub>2</sub>S 354.0707, Found, 354.0709.

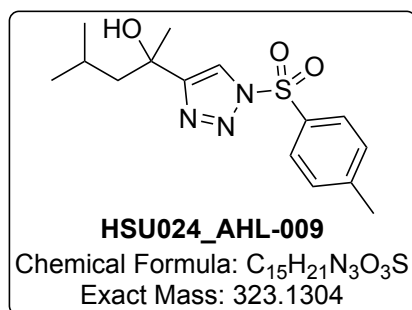

**<sup>1</sup>H NMR** (400 MHz, DMSO-D<sub>6</sub>) δ 8.59 (s, 1H), 7.67 (s, 1H), 7.48 (d, *J* = 8.1 Hz, 2H), 7.12 (d, *J* = 8.3 Hz, 2H), 2.29 (s, 3H), 1.67 – 1.62 (m, 2H), 1.58 (dt, *J* = 12.7, 6.0 Hz, 1H), 1.45 (s, 3H), 0.80 (d, *J* = 6.5 Hz, 3H), 0.70 (d, *J* = 6.5 Hz, 3H).

**<sup>13</sup>C NMR** (151 MHz, DMSO-D<sub>6</sub>) δ 145.32, 137.90, 128.16, 125.52, 69.66, 51.56, 29.65, 24.38, 24.15, 23.82, 20.81.

**HRMS** (ESI-TOF) *m/z*: [M + H]<sup>+</sup> calculated for C<sub>15</sub>H<sub>22</sub>N<sub>3</sub>O<sub>3</sub>S 324.1376, Found, 324.1377.



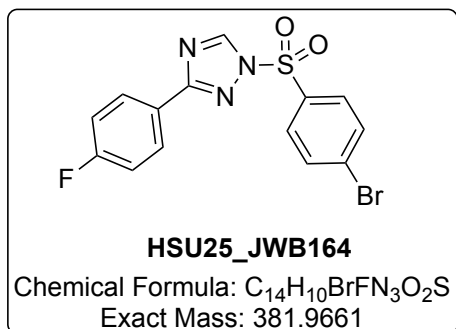

**$^1H$  NMR** (800 MHz, DMSO- $D_6$ )  $\delta$  8.59 (s, 1H), 8.15 – 7.98 (m, 2H), 7.60 – 7.47 (m, 4H), 7.34 (m, 2H).

**$^{13}C$  NMR** (201 MHz, DMSO- $D_6$ )  $\delta$  163.43, 162.22, 147.70, 146.27, 130.61, 128.23, 127.76, 121.57, 115.96, 115.85.

**$^{19}F$  NMR** (376 MHz, DMSO- $D_6$ )  $\delta$  -113.88 (td,  $J$  = 8.9, 4.5 Hz, 1F).

**HRMS** (ESI-TOF)  $m/z$ :  $[M + H]^+$  calculated for  $C_{14}H_{11}BrFN_3O_2S$  382.9656, Found, 382.9648.

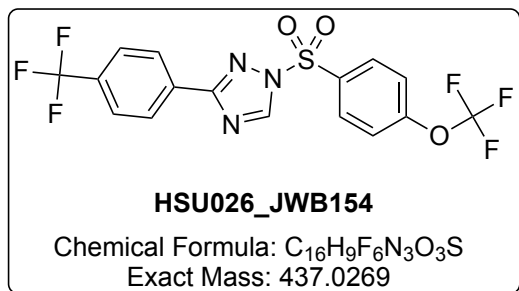

**$^1H$  NMR** (600 MHz, DMSO- $D_6$ )  $\delta$  9.57 (s, 1H), 8.43 – 8.28 (m, 2H), 8.19 (d,  $J$  = 8.1 Hz, 2H), 7.86 (d,  $J$  = 8.1 Hz, 2H), 7.77 – 7.66 (m, 2H).

**$^{13}C$  NMR** (201 MHz, DMSO- $D_6$ )  $\delta$  163.39, 158.41, 153.34, 148.66, 147.95, 146.48, 128.11, 127.80, 127.04, 126.62 (m, 1C), 126.32 (m, 1C), 120.74.

**$^{19}F$  NMR** (376 MHz, Acetone- $D_6$ )  $\delta$  -58.51 (s, 3F), -63.43 (s, 3F).

**HRMS** (ESI-TOF)  $m/z$ :  $[M + H]^+$  calculated for  $C_{16}H_{10}F_6N_3O_3S$  438.0342, Found, 438.0343.

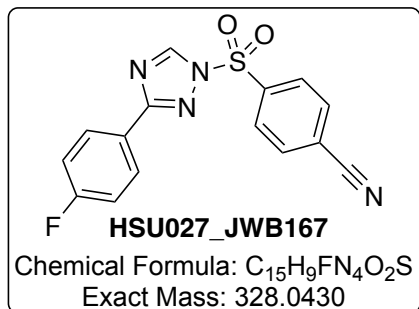

**$^1H$  NMR** (800 MHz, DMSO- $D_6$ )  $\delta$  8.72 (s, 1H), 8.12 – 7.99 (m, 2H), 7.86 – 7.78 (m, 2H), 7.78 – 7.68 (m, 2H), 7.47 – 7.24 (m, 2H).

**<sup>13</sup>C NMR** (201 MHz, DMSO-D6)  $\delta$  163.61, 162.39, 156.82, 152.55, 146.02, 132.10, 128.42 (d,  $J$  = 8.8 Hz), 126.43, 118.69, 116.02 (d,  $J$  = 22.0 Hz), 111.09.

**<sup>19</sup>F NMR** (376 MHz, Acetone-D6)  $\delta$  -111.70 (ddd,  $J$  = 13.7, 8.9, 5.3 Hz, 1F).

**HRMS** (ESI-TOF)  $m/z$ : [M + H]<sup>+</sup> calculated for C<sub>15</sub>H<sub>10</sub>FN<sub>4</sub>O<sub>2</sub>S 329.0503, Found, 329.0498.

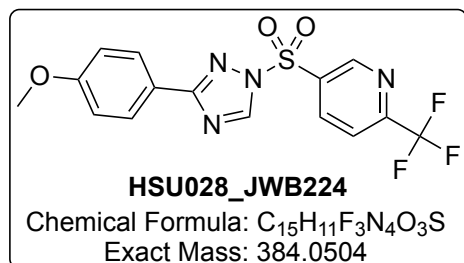

**<sup>1</sup>H NMR** (400 MHz, Acetone-D6)  $\delta$  9.48 (s, 1H), 9.17 (s, 1H), 8.89 (d,  $J$  = 8.3 Hz, 1H), 8.24 (d,  $J$  = 8.3 Hz, 1H), 8.02 (d,  $J$  = 8.9 Hz, 2H), 7.03 (d,  $J$  = 8.9 Hz, 2H), 3.85 (s, 3H).

**<sup>13</sup>C NMR** (100 MHz, Acetone-D6)  $\delta$  166.13, 162.81, 153.09 (d,  $J$  = 35.2 Hz), 150.26, 148.01, 140.23, 137.07, 129.38, 122.79 (q,  $J$  = 2.9 Hz), 122.34, 120.39, 115.07, 55.77.

**<sup>19</sup>F NMR** (376 MHz, Acetone-D6)  $\delta$  -69.04 (s, 1F).

**HRMS** (ESI-TOF)  $m/z$ : [M + H]<sup>+</sup> calculated for C<sub>15</sub>H<sub>12</sub>F<sub>3</sub>N<sub>4</sub>O<sub>3</sub>S 385.0577, Found, 385.0590.

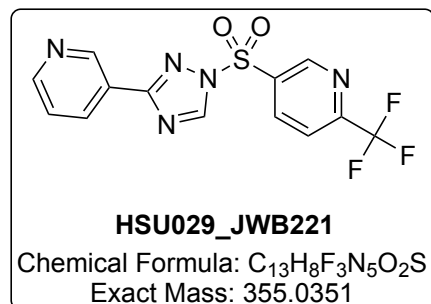

**<sup>1</sup>H NMR** (800 MHz, DMSO-D6)  $\delta$  9.59 (s, 1H), 9.50 (d,  $J$  = 2.4 Hz, 1H), 9.18 (d,  $J$  = 1.2 Hz, 1H), 8.88 (dd,  $J$  = 8.4, 2.4 Hz, 1H), 8.72 (dd,  $J$  = 4.8, 1.7 Hz, 1H), 8.39 – 8.32 (m, 1H), 8.28 (d,  $J$  = 8.4 Hz, 1H), 7.58 – 7.51 (m, 1H).

**<sup>13</sup>C NMR** (201 MHz, DMSO-D6)  $\delta$  162.38, 151.63, 151.29 (d,  $J$  = 35.0 Hz), 149.27, 148.58, 147.49, 139.80, 135.32, 134.31, 124.62, 124.20, 122.33 (q,  $J$  = 2.9 Hz), 121.31, 119.94.

**<sup>19</sup>F NMR** (376 MHz, acetone)  $\delta$  -69.04 (s, 3F).

**HRMS** (ESI-TOF)  $m/z$ : [M + H]<sup>+</sup> calculated for C<sub>13</sub>H<sub>9</sub>F<sub>3</sub>N<sub>5</sub>O<sub>2</sub>S 356.0424, Found, 356.0419.

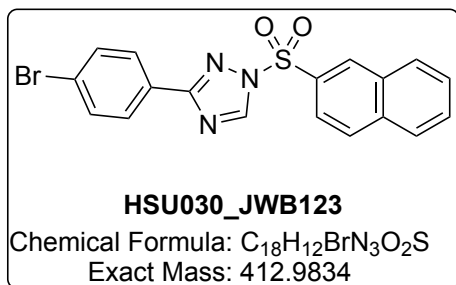

**<sup>1</sup>H NMR** (800 MHz, DMSO-D<sub>6</sub>) δ 8.61 (s, 1H), 8.14 (d, *J* = 0.8 Hz, 1H), 7.99 – 7.94 (m, 3H), 7.92 – 7.88 (m, 1H), 7.86 (d, *J* = 8.3 Hz, 1H), 7.73 – 7.69 (m, 3H), 7.54 – 7.50 (m, 2H).

**<sup>13</sup>C NMR** (201 MHz, DMSO-D<sub>6</sub>) δ 146.20, 145.58, 132.72, 132.15, 131.89, 128.46, 127.93, 127.45, 127.31, 126.43, 126.29, 124.04, 123.97, 122.73.

**HRMS** (ESI-TOF) *m/z*: [M + H]<sup>+</sup> calculated for C<sub>18</sub>H<sub>13</sub>BrN<sub>3</sub>O<sub>2</sub>S 413.9906, Found, 413.9907.

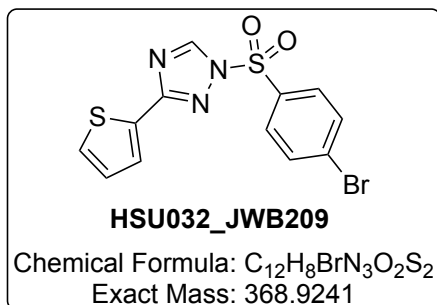

**<sup>1</sup>H NMR** (400 MHz, DMSO-D<sub>6</sub>) δ 9.45 (s, 1H), 8.06 (d, *J* = 8.8 Hz, 2H), 7.97 (d, *J* = 9.0 Hz, 2H), 7.76 (dd, *J* = 5.0, 1.2 Hz, 1H), 7.71 (dd, *J* = 3.7, 1.2 Hz, 1H), 7.18 (dd, *J* = 5.0, 3.7 Hz, 1H).

**<sup>13</sup>C NMR** (100 MHz, DMSO-D<sub>6</sub>) δ 160.38, 148.03, 134.40, 133.55, 130.76, 130.23, 129.82, 128.77, 128.53, 127.83.

**HRMS** (ESI-TOF) *m/z*: [M + H]<sup>+</sup> calculated for C<sub>12</sub>H<sub>9</sub>BrN<sub>3</sub>O<sub>2</sub>S<sub>2</sub> 369.9314, Found, 369.9309.

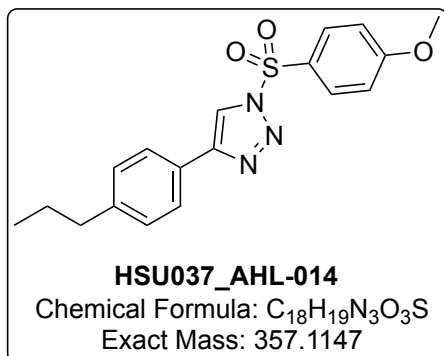

**<sup>1</sup>H NMR** (400 MHz, DMSO-D<sub>6</sub>) δ 9.32 (s, 1H), 8.10 (d, *J* = 9.1 Hz, 2H), 7.83 (d, *J* = 8.3 Hz, 2H), 7.29 (d, *J* = 8.6 Hz, 2H), 7.25 (d, *J* = 9.1 Hz, 2H), 3.87 (s, 3H), 2.58 (t, *J* = 7.5 Hz, 2H), 1.59 (h, *J* = 7.4 Hz, 2H), 0.88 (t, *J* = 7.3 Hz, 3H).

**<sup>13</sup>C NMR** (100 MHz, DMSO-D<sub>6</sub>) δ 165.22, 146.98, 143.18, 130.94, 128.99, 126.23, 126.12, 125.72, 120.72, 115.72, 56.21, 36.97, 23.91, 13.57.

**HRMS** (ESI-TOF) *m/z*: [M + H]<sup>+</sup> calculated for C<sub>18</sub>H<sub>20</sub>N<sub>3</sub>O<sub>3</sub>S 358.1220, Found, 358.1220.

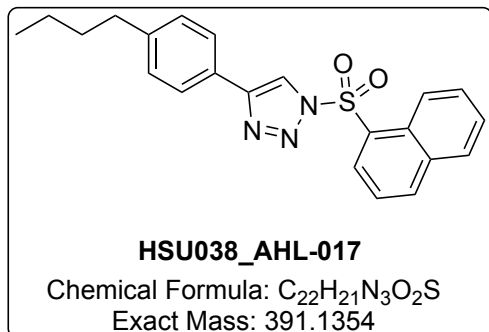

**<sup>1</sup>H NMR** (400 MHz, DMSO-D<sub>6</sub>) δ 9.53 (s, 1H), 8.65 (t, *J* = 7.3 Hz, 2H), 8.51 (d, *J* = 8.3 Hz, 1H), 8.17 (d, *J* = 7.3 Hz, 1H), 7.85 (t, *J* = 7.9 Hz, 1H), 7.79 (d, *J* = 8.2 Hz, 3H), 7.71 (t, *J* = 7.5 Hz, 1H), 7.25 (d, *J* = 8.3 Hz, 2H), 2.56 (t, *J* = 7.7 Hz, 2H), 1.52 (p, *J* = 7.6 Hz, 2H), 1.26 (h, *J* = 7.3 Hz, 2H), 0.85 (t, *J* = 7.3 Hz, 3H).

**<sup>13</sup>C NMR** (100 MHz, DMSO-d<sub>6</sub>) δ 146.90, 143.51, 138.16, 133.82, 132.86, 129.94, 128.95, 127.90, 127.08, 126.00, 125.77, 125.10, 122.95, 121.26, 34.57, 32.94, 21.69, 13.76.

**HRMS** (ESI-TOF) *m/z*: [M + H]<sup>+</sup> calculated for C<sub>22</sub>H<sub>22</sub>N<sub>3</sub>O<sub>2</sub>S 392.1427, Found, 392.1427.

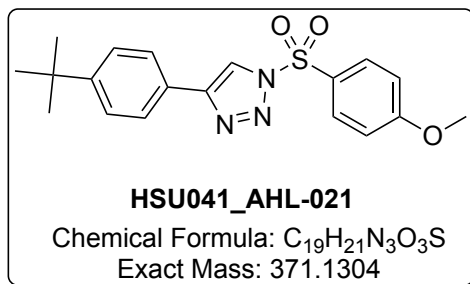

**<sup>1</sup>H NMR** (400 MHz, DMSO-D<sub>6</sub>) δ 9.33 (s, 1H), 8.10 (d, *J* = 9.1 Hz, 2H), 7.85 (d, *J* = 8.5 Hz, 2H), 7.49 (d, *J* = 8.5 Hz, 2H), 7.25 (d, *J* = 9.1 Hz, 2H), 3.88 (s, 3H), 1.29 (s, 9H).

**<sup>13</sup>C NMR** (100 MHz, DMSO-D<sub>6</sub>) δ 165.25, 151.64, 146.88, 130.96, 126.10, 125.98, 125.83, 125.59, 120.79, 115.75, 56.23, 34.49, 31.00.

**HRMS** (ESI-TOF) *m/z*: [M + H]<sup>+</sup> calculated for C<sub>19</sub>H<sub>22</sub>N<sub>3</sub>O<sub>3</sub>S 372.1376, Found, 372.1377.

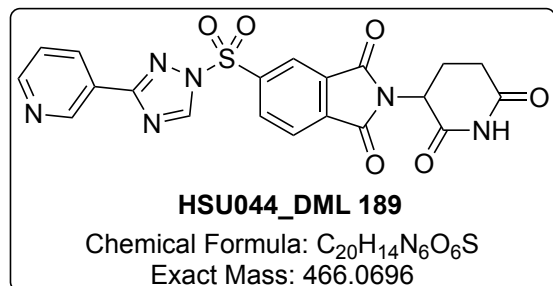

**<sup>1</sup>H NMR** (400 MHz, Acetone-D<sub>6</sub>) δ 10.04 (s, 1H), 9.35 (s, 1H), 9.25 (s, 1H), 8.81 – 8.64 (m, 2H), 8.59 (s, 1H), 8.42 (d, *J* = 8.0 Hz, 1H), 8.25 (d, *J* = 8.0 Hz, 1H), 7.56 (dd, *J* = 8.0, 4.9 Hz, 1H), 5.23 (dd, *J* = 12.9, 5.4 Hz, 1H), 2.98 (ddd, *J* = 17.6, 14.4, 5.4 Hz, 1H), 2.84 – 2.68 (m, 2H), 2.25 (ddt, *J* = 13.0, 5.7, 2.7 Hz, 2H).

**<sup>13</sup>C NMR** (100 MHz, Acetone-D<sub>6</sub>) δ 172.50, 169.55, 166.24, 166.02, 163.78, 151.90, 148.55, 148.26, 142.24, 138.13, 136.12, 135.47, 134.00, 132.98, 125.89, 124.95, 124.13, 50.79, 31.84, 22.98.

**HRMS** (ESI-TOF) *m/z*: [M + H]<sup>+</sup> calculated for C<sub>20</sub>H<sub>15</sub>N<sub>6</sub>O<sub>6</sub>S 467.0768, Found, 467.0768.

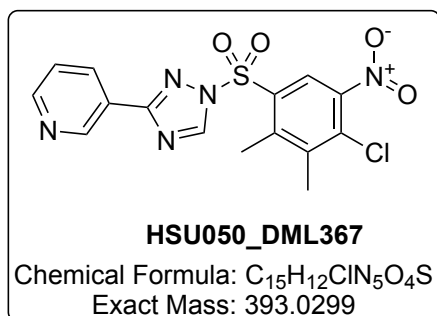

**<sup>1</sup>H NMR** (400 MHz, Acetone-D<sub>6</sub>) δ 9.38 (s, 1H), 9.23 (s, 1H), 8.69 (s, 2H), 8.37 (dd, *J* = 8.1, 1.9 Hz, 1H), 7.52 (dd, *J* = 8.0, 4.6 Hz, 1H), 2.86 (s, 3H), 2.56 (s, 3H).

**<sup>13</sup>C NMR** (100 MHz, Acetone-D<sub>6</sub>) δ 163.54, 152.49, 148.82, 148.35, 145.02, 143.31, 135.09, 134.86, 133.33, 126.03, 125.44, 124.71, 18.39, 17.85.

**HRMS** (ESI-TOF) *m/z*: [M + H]<sup>+</sup> calculated for C<sub>15</sub>H<sub>12</sub>ClN<sub>5</sub>O<sub>4</sub>S 394.0371, Found, 394.0358.

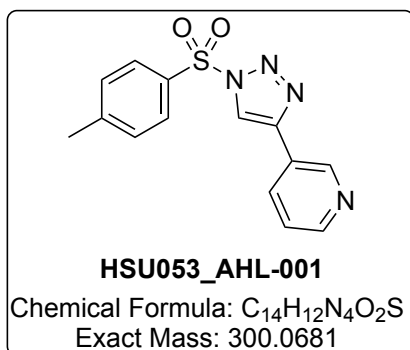

**<sup>1</sup>H NMR** (400 MHz, Acetone-D<sub>6</sub>) δ 9.16 (s, 2H), 8.61 (d, *J* = 4.9 Hz, 1H), 8.31 (dd, *J* = 8.0, 1.8 Hz, 1H), 8.10 (d, *J* = 8.8 Hz, 2H), 7.58 (d, *J* = 8.1 Hz, 2H), 7.48 (dd, *J* = 8.0, 4.8 Hz, 1H), 2.48 (s, 3H).

**<sup>13</sup>C NMR** (100 MHz, Acetone-D<sub>6</sub>) δ 150.85, 148.86, 148.14, 145.42, 133.99, 133.87, 131.63, 129.45, 126.24, 124.67, 122.07, 21.69.

**HRMS** (ESI-TOF) *m/z*: [M + H]<sup>+</sup> calculated for C<sub>14</sub>H<sub>13</sub>BrN<sub>4</sub>O<sub>2</sub>S 301.0754, Found, 301.0755.

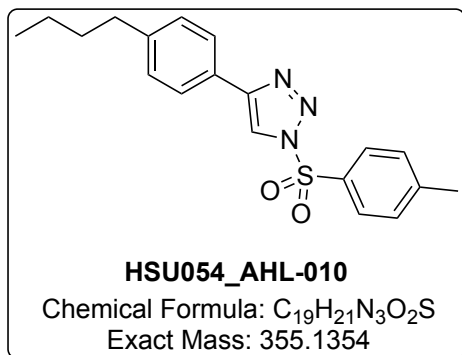

**<sup>1</sup>H NMR** (400 MHz, DMSO-D<sub>6</sub>) δ 9.34 (s, 1H), 8.05 (d, *J* = 8.5 Hz, 2H), 7.83 (d, *J* = 8.3 Hz, 2H), 7.56 (d, *J* = 8.8 Hz, 2H), 7.29 (d, *J* = 8.2 Hz, 2H), 2.60 (t, *J* = 7.6 Hz, 2H), 2.42 (s, 3H), 1.56 (p, *J* = 7.3 Hz, 2H), 1.30 (h, *J* = 7.1 Hz, 2H), 0.89 (t, *J* = 7.3 Hz, 3H).

**<sup>13</sup>C NMR** (151 MHz, DMSO-D<sub>6</sub>) δ 147.68, 147.07, 143.44, 132.40, 130.87, 128.92, 128.22, 126.09, 125.76, 120.87, 34.56, 32.92, 21.68, 21.26, 13.74.

**HRMS** (ESI-TOF) *m/z*: [M + H]<sup>+</sup> calculated for C<sub>19</sub>H<sub>22</sub>N<sub>3</sub>O<sub>2</sub>S 356.1427, Found, 356.1426.

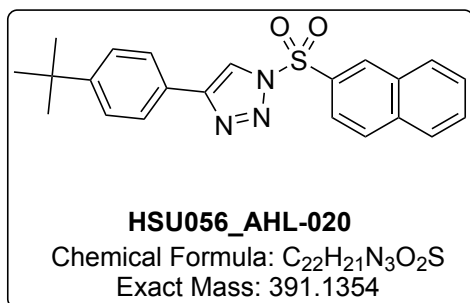

**<sup>1</sup>H NMR** (400 MHz, DMSO-D<sub>6</sub>) δ 9.42 (s, 1H), 9.00 (d, *J* = 2.2 Hz, 1H), 8.33 (d, *J* = 8.3 Hz, 1H), 8.27 (d, *J* = 9.1 Hz, 1H), 8.12 (d, *J* = 7.1 Hz, 1H), 8.05 (dd, *J* = 8.8, 2.1 Hz, 1H), 7.91 – 7.80 (m, 3H), 7.77 (ddd, *J* = 8.2, 7.0, 1.4 Hz, 1H), 7.48 (d, *J* = 8.8 Hz, 2H), 1.28 (s, 9H).

**<sup>13</sup>C NMR** (100 MHz, DMSO-D<sub>6</sub>) δ 151.74, 147.05, 135.62, 132.19, 131.55, 131.02, 130.92, 130.81, 130.04, 128.58, 128.17, 125.87, 125.84, 125.66, 121.75, 121.16, 34.50, 30.99.

**HRMS** (ESI-TOF) *m/z*: [M + H]<sup>+</sup> calculated for C<sub>22</sub>H<sub>22</sub>N<sub>3</sub>O<sub>2</sub>S 392.1427, Found, 392.1428.

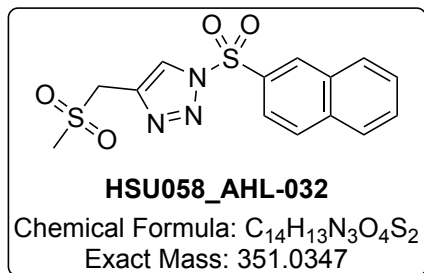

**<sup>1</sup>H NMR** (400 MHz, DMSO-D<sub>6</sub>) δ 9.03 (d, *J* = 2.1 Hz, 1H), 8.96 (s, 1H), 8.33 (d, *J* = 8.0 Hz, 1H), 8.27 (d, *J* = 8.8 Hz, 1H), 8.13 (d, *J* = 7.9 Hz, 1H), 8.06 (dd, *J* = 8.8, 2.1 Hz, 1H), 7.84 (ddd, *J* = 8.3, 6.9, 1.4 Hz, 1H), 7.78 (ddd, *J* = 8.2, 6.9, 1.4 Hz, 1H), 4.68 (s, 2H), 3.03 (s, 3H).

**<sup>13</sup>C NMR** (100 MHz, DMSO-D<sub>6</sub>) δ 137.10, 135.69, 131.76, 131.55, 131.36, 131.00, 130.82, 130.05, 128.59, 128.16, 125.81, 121.82, 50.38.

**HRMS** (ESI-TOF) *m/z*: [M + H]<sup>+</sup> calculated for C<sub>14</sub>H<sub>14</sub>N<sub>3</sub>O<sub>4</sub>S<sub>2</sub> 352.0420, Found, 352.0419.

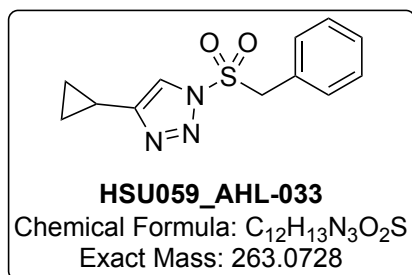

**<sup>1</sup>H NMR** (400 MHz, DMSO-D<sub>6</sub>) δ 8.10 (s, 1H), 7.60 – 7.25 (m, 3H), 7.10 (d, *J* = 6.5 Hz, 2H), 5.29 (s, 2H), 1.97 (ddd, *J* = 13.4, 8.4, 5.0 Hz, 1H), 1.13 – 0.85 (m, 3H), 0.84 – 0.55 (m, 3H).

**<sup>13</sup>C NMR** (151 MHz, DMSO-D<sub>6</sub>) δ 149.70, 130.81, 129.39, 128.77, 126.48, 121.68, 59.98, 7.89, 6.15.

**HRMS** (ESI-TOF) *m/z*: [M + Na]<sup>+</sup> calculated for C<sub>12</sub>H<sub>13</sub>N<sub>3</sub>O<sub>2</sub>SNa 286.0621, Found, 286.0616.

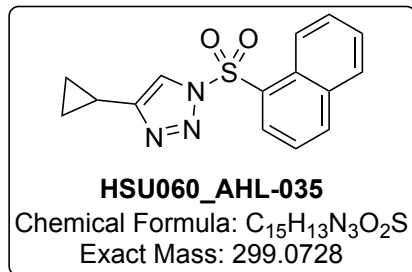

**<sup>1</sup>H NMR** (400 MHz, DMSO-D<sub>6</sub>) δ 8.99 – 8.73 (m, 1H), 7.94 (d, *J* = 7.0 Hz, 1H), 7.91 – 7.83 (m, 2H), 7.60 (s, 1H), 7.53 – 7.47 (m, 2H), 7.43 (t, *J* = 7.7 Hz, 1H), 1.96 (ddd, *J* = 13.3, 8.1, 4.8 Hz, 1H), 0.99 – 0.89 (m, 2H), 0.75 – 0.67 (m, 2H).

**<sup>13</sup>C NMR** (151 MHz, DMSO-D<sub>6</sub>) δ 143.93, 133.54, 129.42, 129.03, 127.75, 127.62, 125.58, 125.56, 124.46, 124.35, 7.95, 5.84.

**HRMS** (ESI-TOF) *m/z*: [M + H]<sup>+</sup> calculated for C<sub>15</sub>H<sub>14</sub>N<sub>3</sub>O<sub>2</sub>S 300.0801, Found, 300.0788.

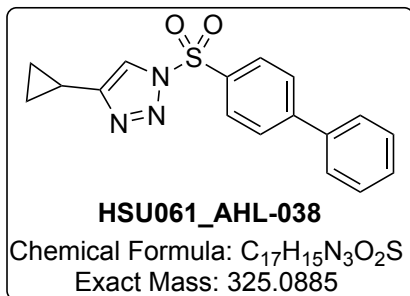

**<sup>1</sup>H NMR** (400 MHz, DMSO-D<sub>6</sub>) δ 9.17 (s, 1H), 7.69 – 7.65 (m, 3H), 7.63 – 7.58 (m, 3H), 7.47 (t, *J* = 7.7 Hz, 2H), 7.37 (t, *J* = 7.6 Hz, 1H), 1.96 (tt, *J* = 8.5, 5.1 Hz, 1H), 0.97 – 0.89 (m, 2H), 0.75 – 0.65 (m, 2H).

**<sup>13</sup>C NMR** (100 MHz, DMSO-D<sub>6</sub>) δ 147.17, 147.00, 140.29, 139.73, 128.99, 127.63, 127.41, 126.78, 126.19, 126.11, 8.00, 5.84.

**HRMS** (ESI-TOF) *m/z*: [M + H]<sup>+</sup> calculated for C<sub>17</sub>H<sub>16</sub>N<sub>3</sub>O<sub>2</sub>S 326.0958, Found, 326.0946.

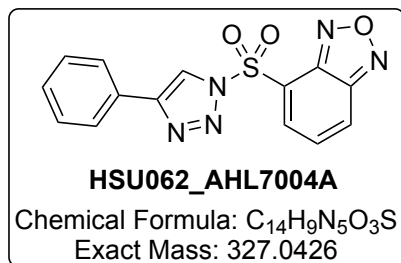

**<sup>1</sup>H NMR** (400 MHz, Acetone-D<sub>6</sub>) δ 9.37 (s, 1H), 8.69 (dd, *J* = 6.9, 0.8 Hz, 1H), 8.51 (dd, *J* = 9.1, 0.8 Hz, 1H), 8.09 – 7.85 (m, 3H), 7.63 – 7.35 (m, 3H).

**<sup>13</sup>C NMR** (100 MHz, Acetone-D<sub>6</sub>) δ 165.86, 150.68, 149.09, 144.74, 139.51, 132.13, 131.58, 129.99, 129.66, 127.67, 125.77, 125.25.

**HRMS** (ESI-TOF) *m/z*: [M + H]<sup>+</sup> calculated for C<sub>14</sub>H<sub>10</sub>N<sub>5</sub>O<sub>3</sub>S 328.0499, Found, 328.0488.

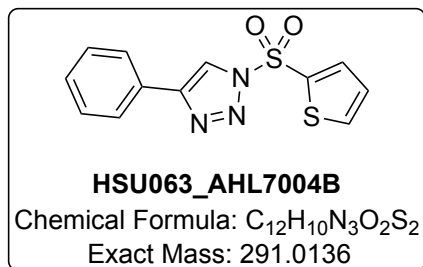

**<sup>1</sup>H NMR** (400 MHz, Acetone-D<sub>6</sub>) δ 9.16 (s, 1H), 8.25 (d, *J* = 5.0 Hz, 1H), 8.17 – 7.94 (m, 3H), 7.49 (s, 3H), 7.35 (t, *J* = 4.6 Hz, 1H).

**<sup>13</sup>C NMR** (100 MHz, Acetone-D<sub>6</sub>) δ 165.51, 147.26, 139.25, 138.25, 136.02, 131.43, 130.22, 129.66, 129.65, 127.59.

**HRMS** (ESI-TOF) *m/z*: [M + H]<sup>+</sup> calculated for C<sub>12</sub>H<sub>11</sub>N<sub>3</sub>O<sub>2</sub>S<sub>2</sub> 292.0209, Found, 292.0196.



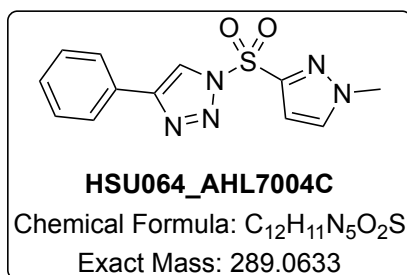

**<sup>1</sup>H NMR** (400 MHz, Acetone-D<sub>6</sub>) δ 9.14 (s, 1H), 8.10 (ddt, *J* = 5.5, 2.2, 0.7 Hz, 2H), 7.93 (d, *J* = 2.4 Hz, 1H), 7.49 (dd, *J* = 3.8, 2.8 Hz, 3H), 7.07 (d, *J* = 2.5 Hz, 1H), 4.01 (s, 3H).

**<sup>13</sup>C NMR** (100 MHz, Acetone-D<sub>6</sub>) δ 165.41, 147.80, 146.46, 134.77, 131.38, 130.34, 129.67, 127.59, 110.22, 40.55.

**HRMS** (ESI-TOF) *m/z*: [M + H]<sup>+</sup> calculated for C<sub>12</sub>H<sub>12</sub>N<sub>5</sub>O<sub>2</sub>S 290.0706, Found, 290.0695

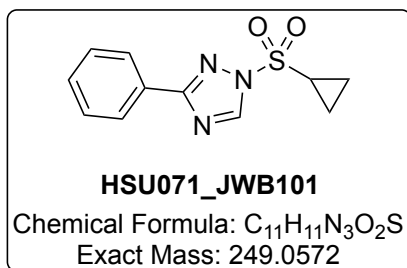

**<sup>1</sup>H NMR** (800 MHz, DMSO-D<sub>6</sub>) δ 9.27 (s, 1H), 8.32 – 7.96 (m, 2H), 7.72 – 7.31 (m, 3H), 3.37 (tt, *J* = 7.8, 4.5 Hz, 1H), 1.44 – 1.41 (m, 2H), 1.39 – 1.22 (m, 2H).

**<sup>13</sup>C NMR** (201 MHz, DMSO-D<sub>6</sub>) δ 163.49, 147.48, 130.64, 129.07, 128.99, 126.53, 30.99, 7.25.

**HRMS** (ESI-TOF) *m/z*: [M + H]<sup>+</sup> calculated for C<sub>11</sub>H<sub>12</sub>N<sub>3</sub>O<sub>2</sub>S 250.0645, Found, 250.0641.

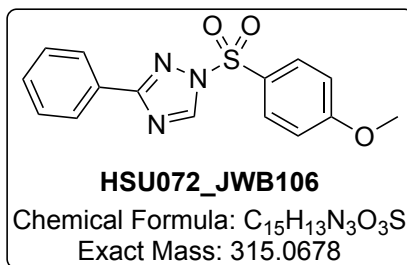

**<sup>1</sup>H NMR** (800 MHz, DMSO-D<sub>6</sub>) δ 9.42 (s, 1H), 8.10 – 8.07 (m, 2H), 8.00 – 7.96 (m, 2H), 7.49 (dd, *J* = 5.1, 2.0 Hz, 3H), 7.26 – 7.20 (m, 2H), 3.86 (s, 3H).

**$^{13}\text{C}$  NMR** (201 MHz, DMSO- $\text{D}_6$ )  $\delta$  164.98, 163.79, 147.34, 130.95, 130.68, 129.02, 128.77, 126.47, 126.05, 115.54, 56.13.

**HRMS** (ESI-TOF)  $m/z$ :  $[\text{M} + \text{H}]^+$  calculated for  $\text{C}_{15}\text{H}_{14}\text{N}_3\text{O}_3\text{S}$  316.0750, Found, 316.0748.

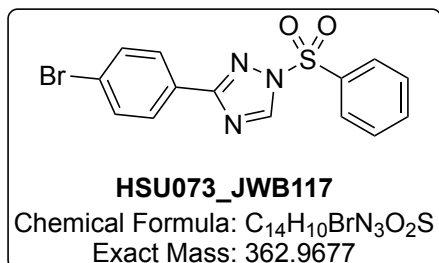

**$^1\text{H}$  NMR** (600 MHz, DMSO- $\text{D}_6$ )  $\delta$  9.51 (s, 1H), 8.15 (d,  $J = 7.5$  Hz, 2H), 7.92 (d,  $J = 8.4$  Hz, 2H), 7.88 (t,  $J = 7.5$  Hz, 1H), 7.75 (t,  $J = 7.8$  Hz, 2H), 7.70 (d,  $J = 8.4$  Hz, 2H).

**$^{13}\text{C}$  NMR** (201 MHz, DMSO- $\text{D}_6$ )  $\delta$  163.38, 152.71, 148.19, 132.23, 131.92, 128.52, 128.48, 128.00, 127.98, 127.67, 125.48.

**HRMS** (ESI-TOF)  $m/z$ :  $[\text{M} + \text{H}]^+$  calculated for  $\text{C}_{14}\text{H}_{11}\text{BrN}_3\text{O}_2\text{S}$  363.9750, Found, 363.9744.

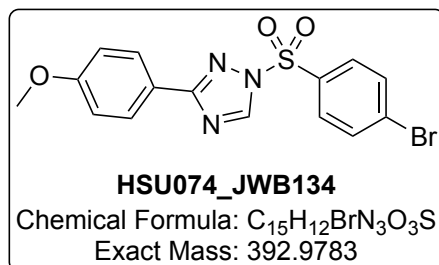

**$^1\text{H}$  NMR** (600 MHz, DMSO- $\text{D}_6$ )  $\delta$  9.42 (s, 1H), 8.06 (d,  $J = 8.6$  Hz, 2H), 7.94 (dd,  $J = 17.3, 8.7$  Hz, 4H), 7.04 (d,  $J = 8.7$  Hz, 2H), 3.80 (s, 3H).

**$^{13}\text{C}$  NMR** (201 MHz, DMSO- $\text{D}_6$ )  $\delta$  164.22, 161.33, 152.35, 147.60, 130.67, 128.24, 127.76, 121.66, 121.23, 114.62, 55.45.

**HRMS** (ESI-TOF)  $m/z$ :  $[\text{M} + \text{H}]^+$  calculated for  $\text{C}_{15}\text{H}_{13}\text{BrN}_3\text{O}_3\text{S}$  393.9856, Found, 393.9849.

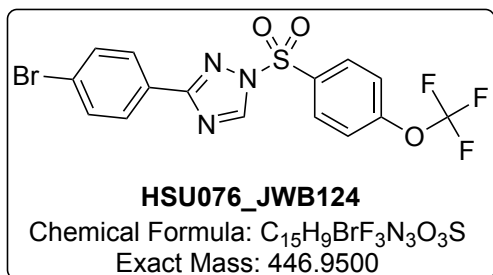

**$^1H$  NMR** (800 MHz, DMSO- $D_6$ )  $\delta$  8.63 (s, 1H), 8.04 – 7.89 (m, 2H), 7.80 – 7.60 (m, 4H), 7.43 – 7.16 (m, 2H).

**$^{13}C$  NMR** (201 MHz, DMSO- $D_6$ )  $\delta$  148.61, 148.09, 146.67, 132.37, 129.43, 128.41, 128.11, 123.24, 121.14, 120.73, 119.87.

**$^{19}F$  NMR** (376 MHz, Acetone- $D_6$ )  $\delta$  -58.50 (s, 3F).

**HRMS** (ESI-TOF)  $m/z$ :  $[M + H]^+$  calculated for  $C_{15}H_{10}BrF_3N_3O_3S$  447.9573, Found, 447.9562.

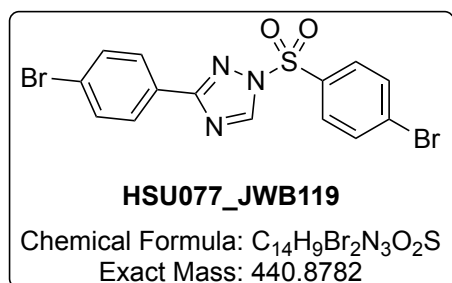

**$^1H$  NMR** (800 MHz, DMSO- $D_6$ )  $\delta$  8.62 (s, 1H), 8.06 – 7.84 (m, 2H), 7.76 – 7.65 (m, 2H), 7.61 – 7.44 (m, 4H).

**$^{13}C$  NMR** (201 MHz, DMSO- $D_6$ )  $\delta$  157.69, 147.68, 146.17, 131.90, 130.62, 128.95, 127.95, 127.78, 122.77, 121.60.

**HRMS** (ESI-TOF)  $m/z$ :  $[M + H]^+$  calculated for  $C_{14}H_{10}Br_2N_3O_2S$  441.8855, Found, 441.8853.

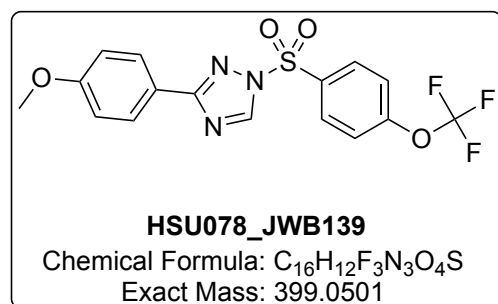

**$^1H$  NMR** (800 MHz, DMSO- $D_6$ )  $\delta$  9.41 (s, 1H), 8.57 – 8.09 (m, 2H), 8.04 – 7.84 (m, 2H), 7.71 (dd,  $J$  = 9.1, 1.1 Hz, 2H), 7.25 – 6.76 (m, 2H), 3.81 (s, 3H).

**$^{13}C$  NMR** (201 MHz, DMSO- $D_6$ )  $\delta$  164.08, 161.21, 153.06, 147.66, 133.93, 131.14, 128.17, 121.92, 120.92, 114.37, 55.26.

**$^{19}F$  NMR** (376 MHz, Acetone- $D_6$ )  $\delta$  -58.50 (s, 3F).

**HRMS** (ESI-TOF)  $m/z$ :  $[M + H]^+$  calculated for  $C_{16}H_{11}F_3N_3O_4S$  400.0573, Found, 400.0568.

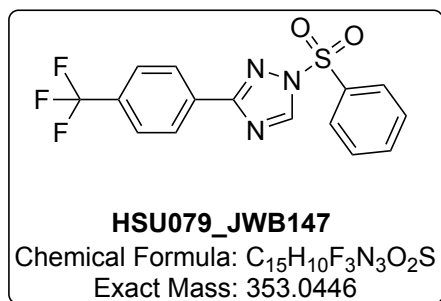

**$^1H$  NMR** (600 MHz, DMSO- $D_6$ )  $\delta$  9.57 (s, 1H), 8.18 (t,  $J = 9.3$  Hz, 4H), 7.87 (m, 3H), 7.75 (t,  $J = 7.9$  Hz, 2H).

**$^{13}C$  NMR** (201 MHz, DMSO- $D_6$ )  $\delta$  162.92, 158.08, 152.90, 148.18, 146.10, 128.49, 127.68, 127.35, 126.56, 126.20, 125.86 (q,  $J = 3.7$  Hz), 125.49.

**$^{19}F$  NMR** (376 MHz, acetone)  $\delta$  -63.41 (s, 3F).

**HRMS** (ESI-TOF)  $m/z$ :  $[M + H]^+$  calculated for  $C_{15}H_{11}F_3N_3O_2S$  354.0519, Found, 354.0519.

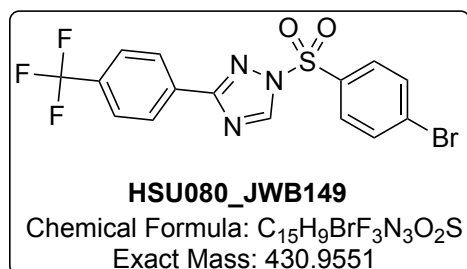

**$^1H$  NMR** (800 MHz, DMSO- $D_6$ )  $\delta$  8.67 (s, 1H), 8.23 (d,  $J = 8.0$  Hz, 2H), 7.86 (d,  $J = 7.9$  Hz, 2H), 7.61 – 7.36 (m, 4H).

**$^{13}C$  NMR** (201 MHz, DMSO- $D_6$ )  $\delta$  158.12, 147.65, 146.10, 134.08, 130.64, 129.30 (q,  $J = 31.6$  Hz), 127.76, 126.55, 125.86 (q,  $J = 3.9$  Hz), 124.18 (d,  $J = 272.4$  Hz), 121.63.

**$^{19}F$  NMR** (376 MHz, Acetone- $D_6$ )  $\delta$  -63.41 (s, 3F).

**HRMS** (ESI-TOF)  $m/z$ :  $[M + H]^+$  calculated for  $C_{15}H_{10}BrF_3N_3O_2S$  431.9624, Found, 431.9614.

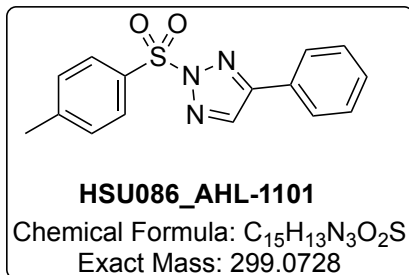

**$^1H$  NMR** (400 MHz, Aceton-D6)  $\delta$  8.53 (d,  $J$  = 1.0 Hz, 1H), 7.99 (d,  $J$  = 8.5 Hz, 2H), 7.94 (dd,  $J$  = 6.9, 1.4 Hz, 2H), 7.55 – 7.39 (m, 5H), 2.42 (s, 3H).

**$^{13}C$  NMR** (100 MHz, Acetone-D6)  $\delta$  152.51, 148.04, 137.40, 133.97, 131.30, 130.89, 129.98, 129.32, 127.48, 21.62.

**HRMS** (ESI-TOF)  $m/z$ :  $[M + H]^+$  calculated for  $C_{15}H_{14}N_3O_2S$  300.0801, Found, 300.0793.

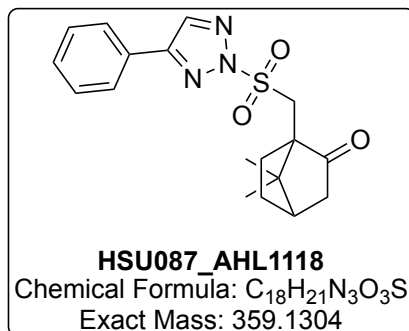

**$^1H$  NMR** (400 MHz, Acetone-D6)  $\delta$  8.59 (s, 1H), 8.00 (d,  $J$  = 6.5 Hz, 2H), 7.60 – 7.45 (m, 3H), 4.03 (d,  $J$  = 15.2 Hz, 1H), 3.72 (d,  $J$  = 15.2 Hz, 1H), 2.43 – 2.25 (m, 2H), 2.16 (t,  $J$  = 4.5 Hz, 1H), 2.13 – 2.07 (m, 1H), 1.94 (d,  $J$  = 18.4 Hz, 1H), 1.76 (ddd,  $J$  = 13.8, 9.4, 4.6 Hz, 1H), 1.52 (ddd,  $J$  = 12.9, 9.3, 3.8 Hz, 1H), 1.12 (s, 3H), 0.91 (s, 3H).

**$^{13}C$  NMR** (100 MHz, Aceton-D6)  $\delta$  213.17, 151.90, 136.63, 130.80, 130.01, 129.60, 127.51, 59.19, 52.69, 49.06, 43.48, 42.69, 27.37, 25.76, 19.72, 19.70.

**HRMS** (ESI-TOF)  $m/z$ :  $[M + H]^+$  calculated for  $C_{18}H_{22}N_3O_3S$  360.1376, Found, 360.1363.

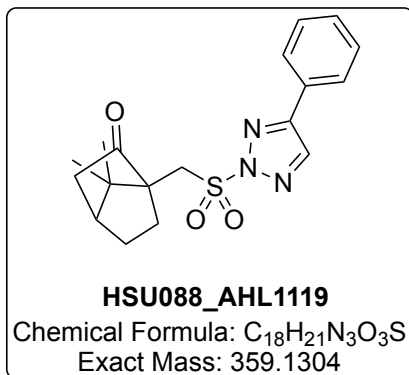

**<sup>1</sup>H NMR** (400 MHz, CDCl<sub>3</sub>) δ 8.18 (s, 1H), 7.90 (dd, *J* = 8.0, 1.7 Hz, 2H), 7.53 – 7.42 (m, 3H), 3.99 (d, *J* = 15.0 Hz, 1H), 3.43 (d, *J* = 14.9 Hz, 1H), 2.49 (ddd, *J* = 14.9, 11.7, 4.0 Hz, 1H), 2.39 (dt, *J* = 18.6, 4.0 Hz, 1H), 2.19 – 2.03 (m, 2H), 1.94 (d, *J* = 18.6 Hz, 1H), 1.80 (ddd, *J* = 13.9, 9.3, 4.5 Hz, 1H), 1.47 (ddd, *J* = 13.1, 9.2, 3.8 Hz, 1H), 1.18 (s, 3H), 0.91 (s, 3H).

**<sup>13</sup>C NMR** (151 MHz, DMSO-D<sub>6</sub>) δ 213.02, 150.63, 136.47, 130.10, 129.25, 128.11, 126.60, 58.14, 51.78, 48.35, 42.06, 41.79, 26.24, 24.72, 19.09, 18.95.

**HRMS** (ESI-TOF) *m/z*: [M + H]<sup>+</sup> calculated for C<sub>18</sub>H<sub>22</sub>N<sub>3</sub>O<sub>3</sub>S 360.1376, Found, 360.1363.

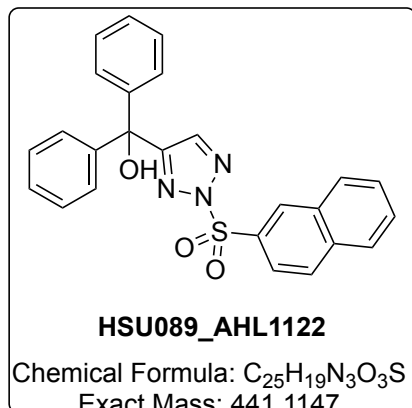

**<sup>1</sup>H NMR** (400 MHz, DMSO-D<sub>6</sub>) δ 8.80 (d, *J* = 2.5 Hz, 1H), 8.31 (d, *J* = 7.4 Hz, 1H), 8.21 (d, *J* = 9.0 Hz, 1H), 8.17 (s, 1H), 8.11 (d, *J* = 8.1 Hz, 1H), 7.88 – 7.79 (m, 2H), 7.76 (ddd, *J* = 8.2, 6.9, 1.4 Hz, 1H), 7.23 – 7.11 (m, 10H), 6.97 (s, 1H).

**<sup>13</sup>C NMR** (100 MHz, DMSO-D<sub>6</sub>) δ 160.07, 145.11, 139.77, 135.39, 131.81, 131.53, 130.67, 130.57, 130.29, 129.95, 128.39, 128.08, 127.80, 127.28, 126.74, 121.78, 75.93.

**HRMS** (ESI-TOF) *m/z*: [M + H]<sup>+</sup> calculated for C<sub>25</sub>H<sub>20</sub>N<sub>3</sub>O<sub>3</sub>S 442.1220, Found, 442.1204.

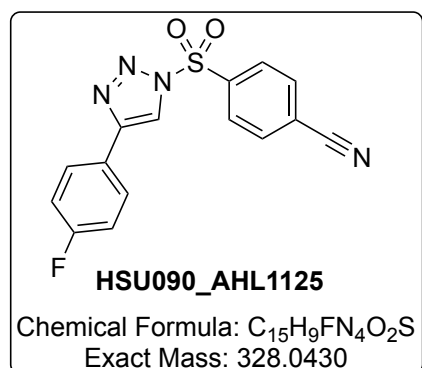

**<sup>1</sup>H NMR** (400 MHz, Acetone-D<sub>6</sub>) δ 8.63 (s, 1H), 8.30 (d, *J* = 8.9 Hz, 2H), 8.14 (d, *J* = 8.8 Hz, 2H), 8.02 (dd, *J* = 8.8, 5.3 Hz, 2H), 7.29 (t, *J* = 8.8 Hz, 2H).

**<sup>13</sup>C NMR** (100 MHz, Acetone-D<sub>6</sub>) δ 164.74 (d, *J* = 248.7 Hz), 163.50, 152.52, 140.57, 138.43, 134.77, 130.01, 130.00 (d, *J* = 8.7 Hz), 125.50 (d, *J* = 3.2 Hz), 125.48, 119.60, 117.60, 117.03 (d, *J* = 22.2 Hz).

**<sup>19</sup>F NMR** (376 MHz, Acetone-D<sub>6</sub>) δ -111.64 – -111.76 (m, 1F).

**HRMS** (ESI-TOF) *m/z*: [M + H]<sup>+</sup> calculated for C<sub>15</sub>H<sub>10</sub>FN<sub>4</sub>O<sub>2</sub>S 329.0503, Found, 329.0499.

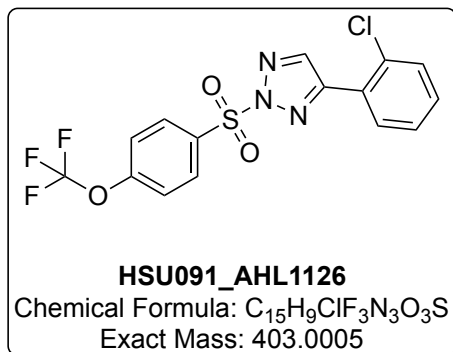

**$^1H$  NMR** (400 MHz,  $CDCl_3$ )  $\delta$  8.38 (s, 1H), 8.20 (d,  $J = 9.1$  Hz, 2H), 7.98 – 7.81 (m, 1H), 7.57 – 7.43 (m, 1H), 7.43 – 7.32 (m, 4H).

**$^{13}C$  NMR** (151 MHz, DMSO- $D_6$ )  $\delta$  153.24, 149.41, 139.95, 133.25, 131.79, 131.73, 131.34, 131.24, 131.21, 130.45, 127.84, 126.65, 122.02.

**$^{19}F$  NMR** (376 MHz, Acetone- $D_6$ )  $\delta$  -58.51 (s, 3F).

**HRMS** (ESI-TOF)  $m/z$ :  $[M + H]^+$  calculated for  $C_{15}H_{10}ClF_3N_3O_3S$  404.0078, Found, 404.0076.

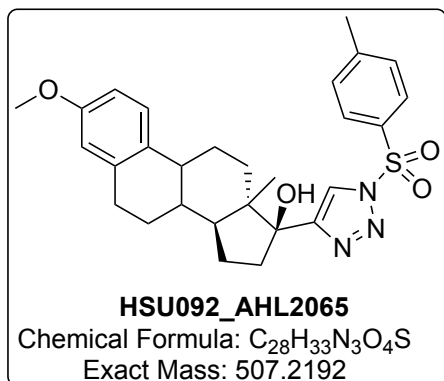

**$^1H$  NMR** (400 MHz, DMSO- $D_6$ )  $\delta$  7.92 (d,  $J = 8.6$  Hz, 2H), 7.72 (s, 1H), 7.50 (d,  $J = 9.4$  Hz, 2H), 7.10 (d,  $J = 8.2$  Hz, 1H), 6.65 (dd,  $J = 8.6, 2.9$  Hz, 1H), 6.58 (d,  $J = 2.9$  Hz, 1H), 5.51 (s, 1H), 3.67 (s, 3H), 3.38 (d,  $J = 7.0$  Hz, 1H), 2.76 (d,  $J = 5.4$  Hz, 2H), 2.43 (s, 3H), 2.29 – 2.05 (m, 4H), 1.96 – 1.77 (m, 3H), 1.52 – 1.18 (m, 5H), 0.98 (s, 3H), 0.59 – 0.49 (m, 1H).

**$^{13}C$  NMR** (100 MHz, DMSO- $D_6$ )  $\delta$  157.05, 146.39, 146.33, 137.33, 134.38, 133.80, 131.93, 130.07, 129.07, 126.16, 113.37, 111.48, 82.06, 54.86, 48.77, 47.89, 42.81, 40.73, 33.62, 29.25, 26.90, 26.14, 22.47, 21.25, 13.86.

**HRMS** (ESI-TOF)  $m/z$ :  $[M + H]^+$  calculated for  $C_{28}H_{34}N_3O_4S$  508.2265, Found, 508.2258.

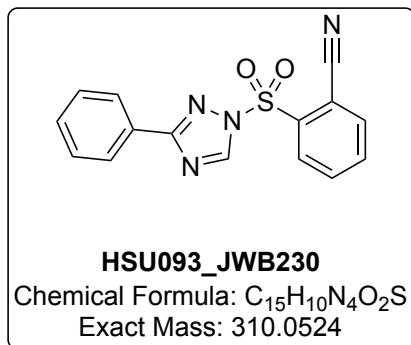

**<sup>1</sup>H NMR** (800 MHz, DMSO-D<sub>6</sub>) δ 8.79 (s, 1H), 8.07 – 7.98 (m, 2H), 7.87 (dd, *J* = 7.8, 1.3 Hz, 2H), 7.76 (dd, *J* = 7.6, 1.3 Hz, 2H), 7.64 (td, *J* = 7.7, 1.3 Hz, 2H), 7.56 – 7.52 (m, 2H), 7.52 – 7.47 (m, 2H).

**<sup>13</sup>C NMR** (201 MHz, DMSO-D<sub>6</sub>) δ 156.64, 150.35, 145.86, 133.95, 132.27, 130.10, 129.04, 128.93, 127.05, 126.55, 126.17, 117.67, 108.95.

**HRMS** (ESI-TOF) *m/z*: [M + H]<sup>+</sup> calculated for C<sub>15</sub>H<sub>11</sub>N<sub>4</sub>O<sub>2</sub>S 311.0597, Found, 311.0596.

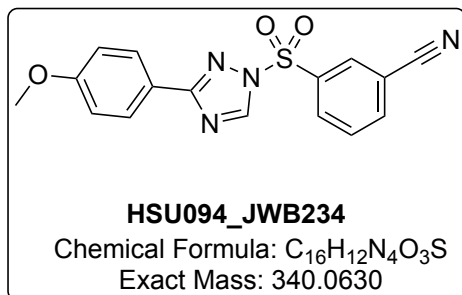

**<sup>1</sup>H NMR** (800 MHz, CDCl<sub>3</sub>) δ 8.72 (s, 1H), 8.42 (t, *J* = 1.7 Hz, 1H), 8.34 (ddd, *J* = 8.1, 1.9, 1.1 Hz, 1H), 8.03 (d, *J* = 8.9 Hz, 2H), 7.98 (dt, *J* = 7.7, 1.3 Hz, 1H), 7.76 (t, *J* = 7.9 Hz, 2H), 6.95 (d, *J* = 8.8 Hz, 2H), 3.85 (s, 3H).

**<sup>13</sup>C NMR** (201 MHz, CDCl<sub>3</sub>) δ 165.85, 161.89, 145.65, 138.30, 138.08, 132.48, 132.26, 130.93, 128.92, 121.38, 116.49, 114.69, 114.27, 55.55.

**HRMS** (ESI-TOF) *m/z*: [M + H]<sup>+</sup> calculated for C<sub>16</sub>H<sub>12</sub>N<sub>4</sub>O<sub>3</sub>S 341.0703, Found, 341.0694.



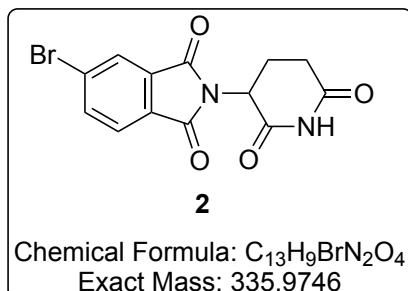

**$^1H$  NMR** (600 MHz, DMSO- $D_6$ )  $\delta$  11.14 (s, 1H), 8.15 (d,  $J$  = 1.8 Hz, 1H), 8.10 (dd,  $J$  = 7.9, 1.7 Hz, 1H), 7.87 (d,  $J$  = 7.9 Hz, 1H), 5.16 (dd,  $J$  = 13.0, 5.4 Hz, 1H), 2.89 (ddd,  $J$  = 17.1, 13.9, 5.4 Hz, 1H), 2.61 (dd,  $J$  = 17.4, 4.0 Hz, 1H), 2.56 – 2.48 (m, 1H), 2.06 (dtd,  $J$  = 13.0, 5.4, 2.4 Hz, 1H).

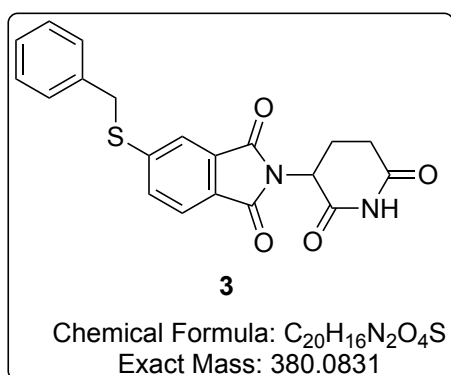

**$^1H$  NMR** (600 MHz, DMSO- $D_6$ )  $\delta$  11.09 (s, 1H), 7.93 – 7.57 (m, 3H), 7.53 – 7.36 (m, 2H), 7.31 (t,  $J$  = 7.6 Hz, 2H), 7.27 – 7.17 (m, 1H), 5.10 (dd,  $J$  = 12.9, 5.4 Hz, 1H), 4.47 (s, 2H), 2.85 (ddd,  $J$  = 17.1, 13.9, 5.4 Hz, 1H), 2.57 (d,  $J$  = 17.3 Hz, 1H), 2.49 (m, 2H), 2.12 – 1.97 (m, 1H).

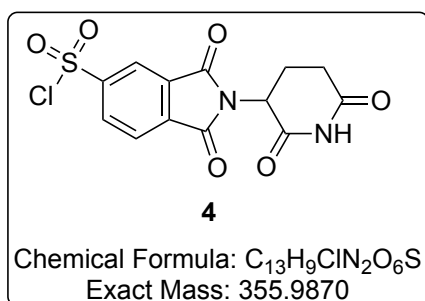

**$^1H$  NMR** (600 MHz, DMSO- $D_6$ )  $\delta$  11.12 (s, 1H), 8.07 (dd,  $J$  = 7.6, 1.3 Hz, 1H), 7.96 (s, 1H), 7.90 (d,  $J$  = 7.7 Hz, 1H), 5.15 (dd,  $J$  = 12.9, 5.5 Hz, 1H), 2.89 (ddd,  $J$  = 17.9, 13.8, 5.5 Hz, 1H), 2.70 – 2.52 (m, 2H), 2.16 – 2.03 (m, 1H).

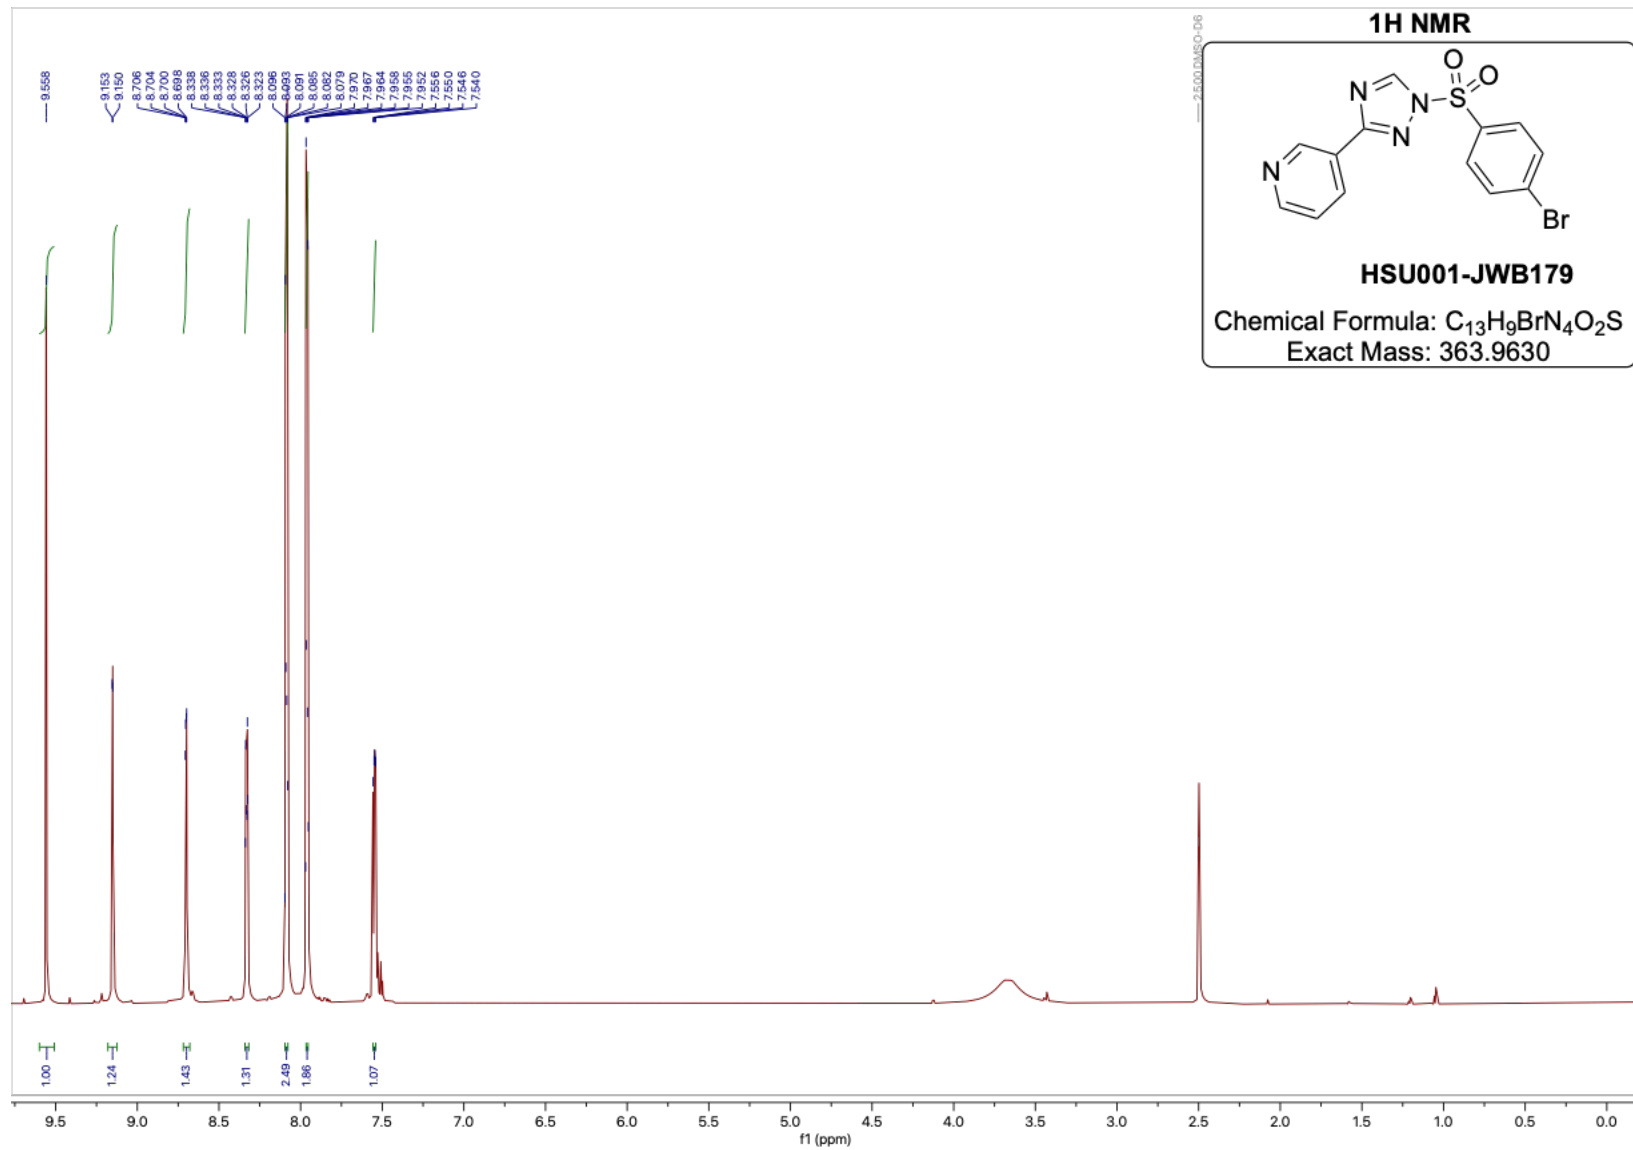

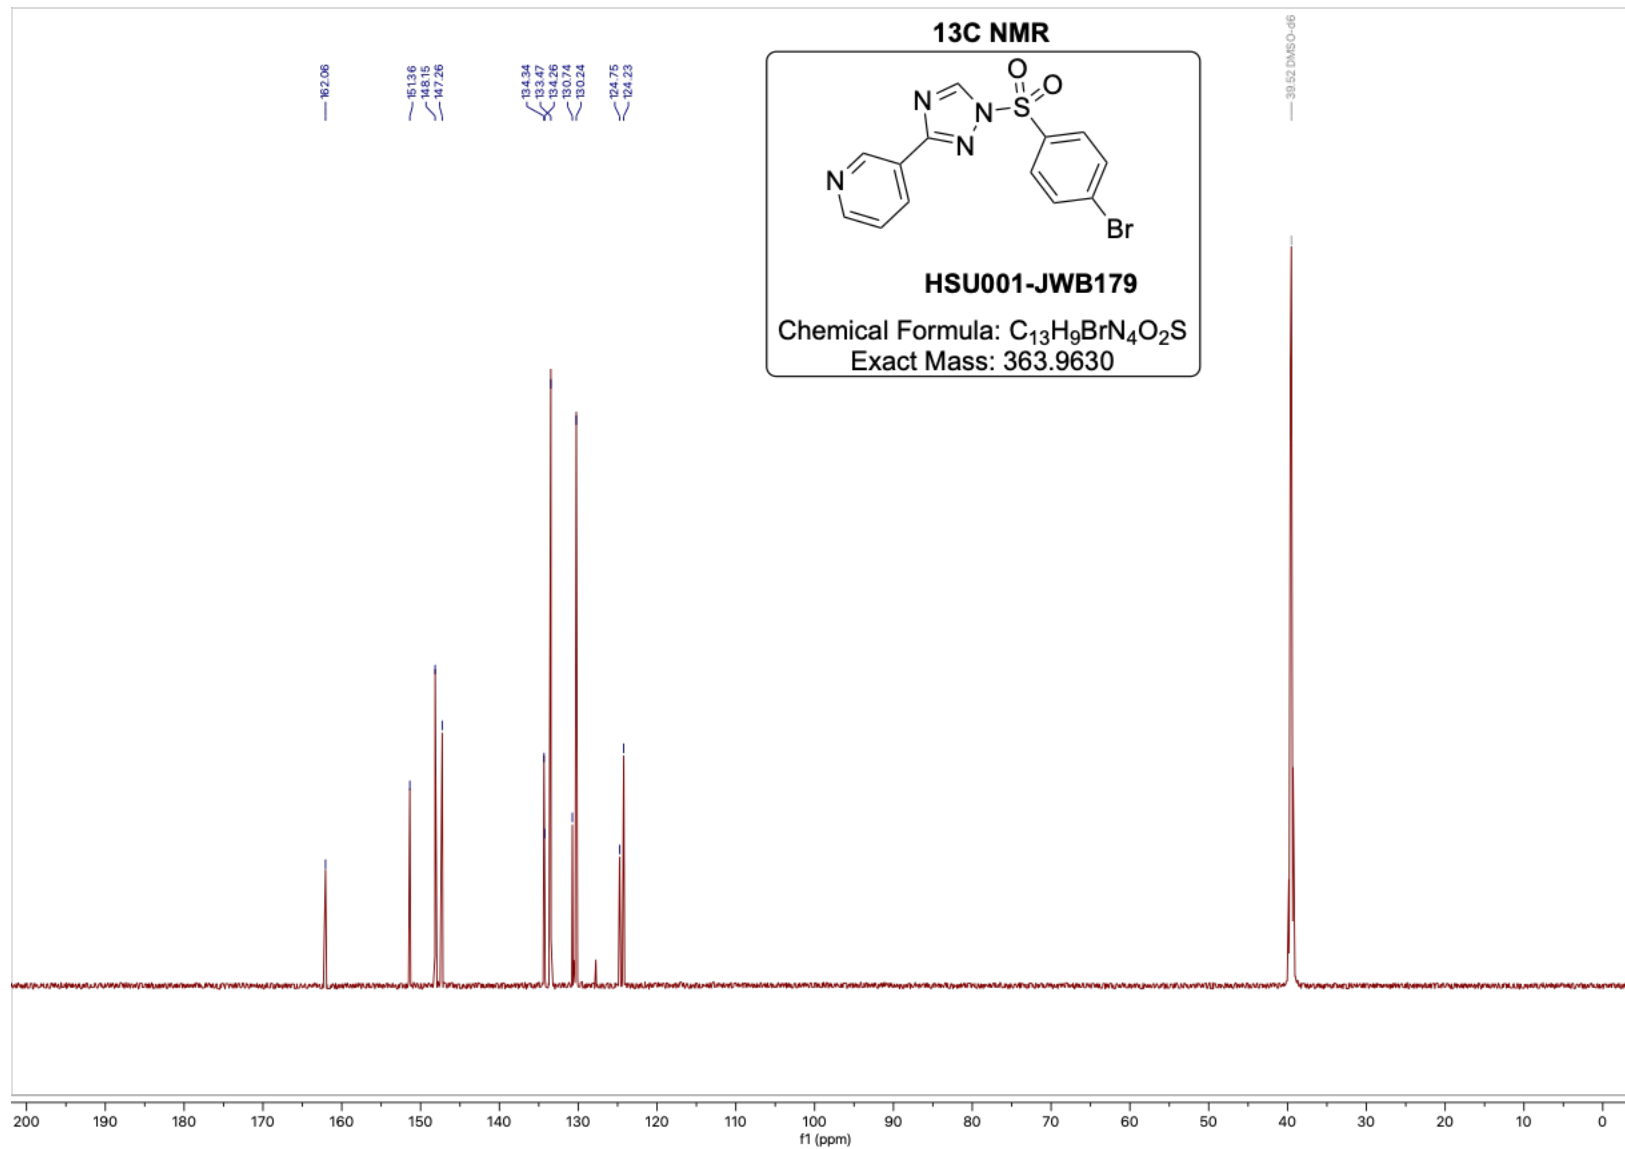

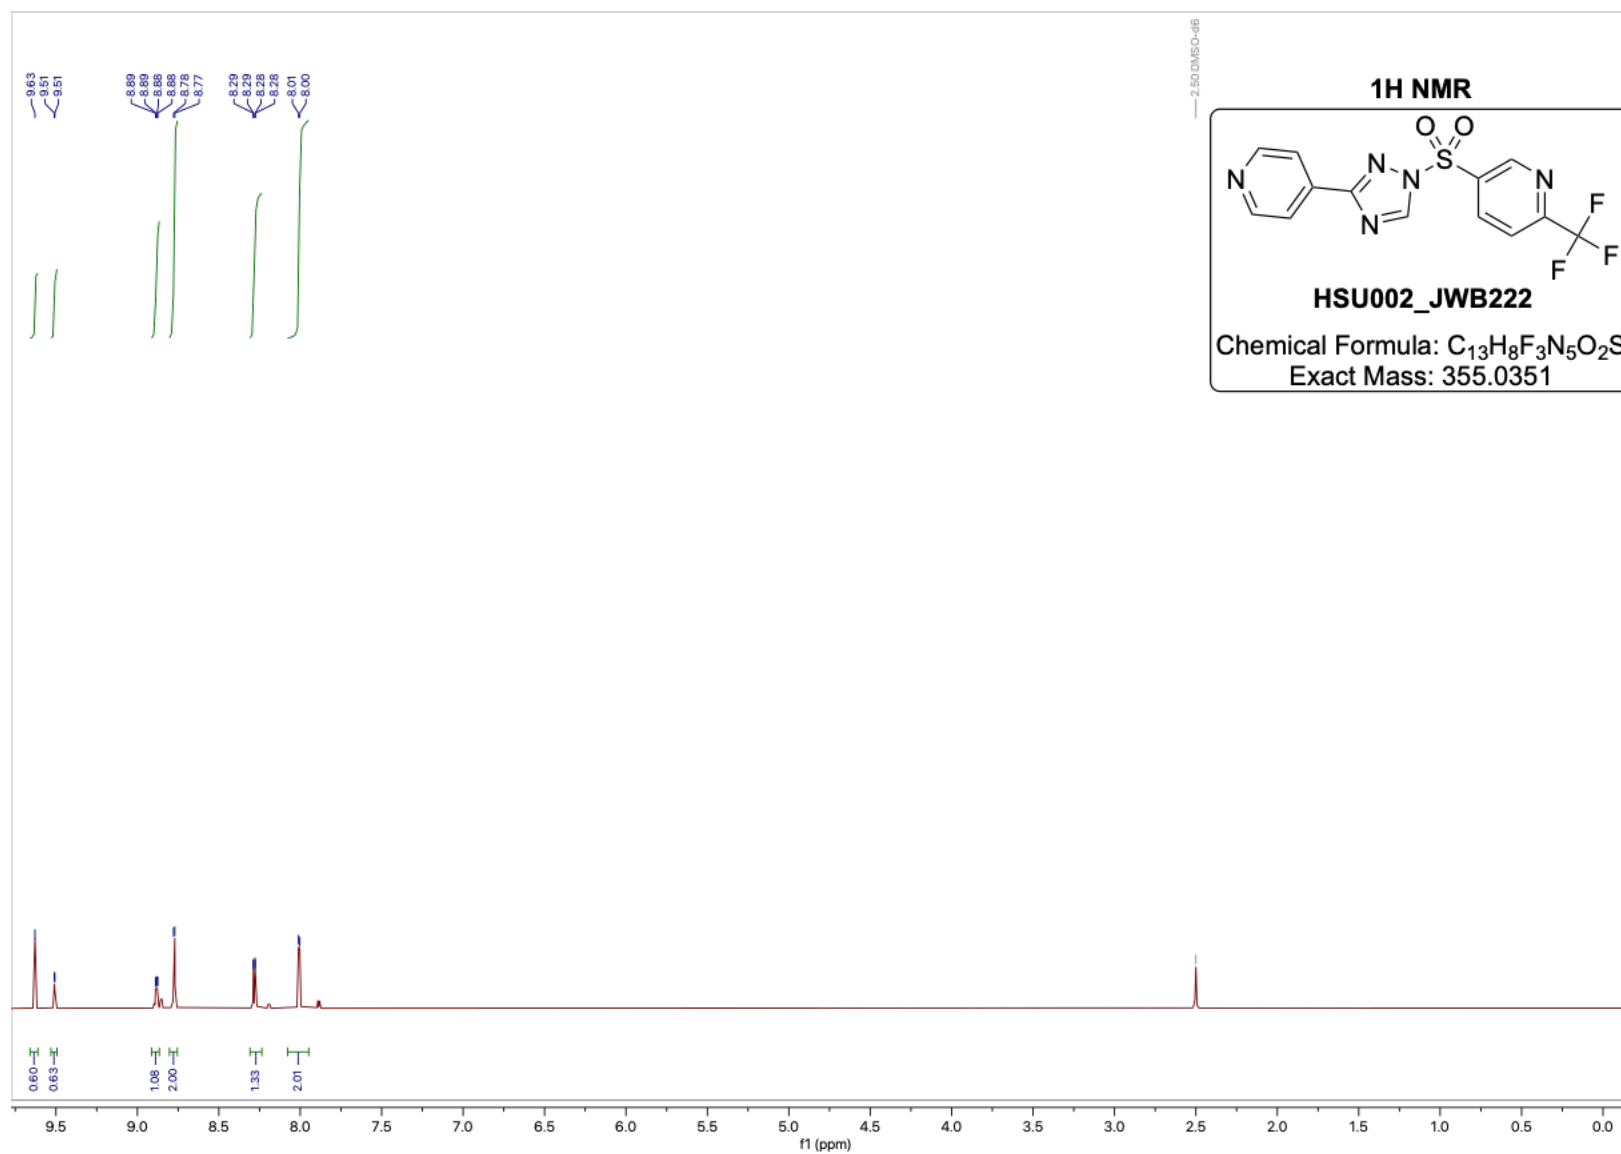

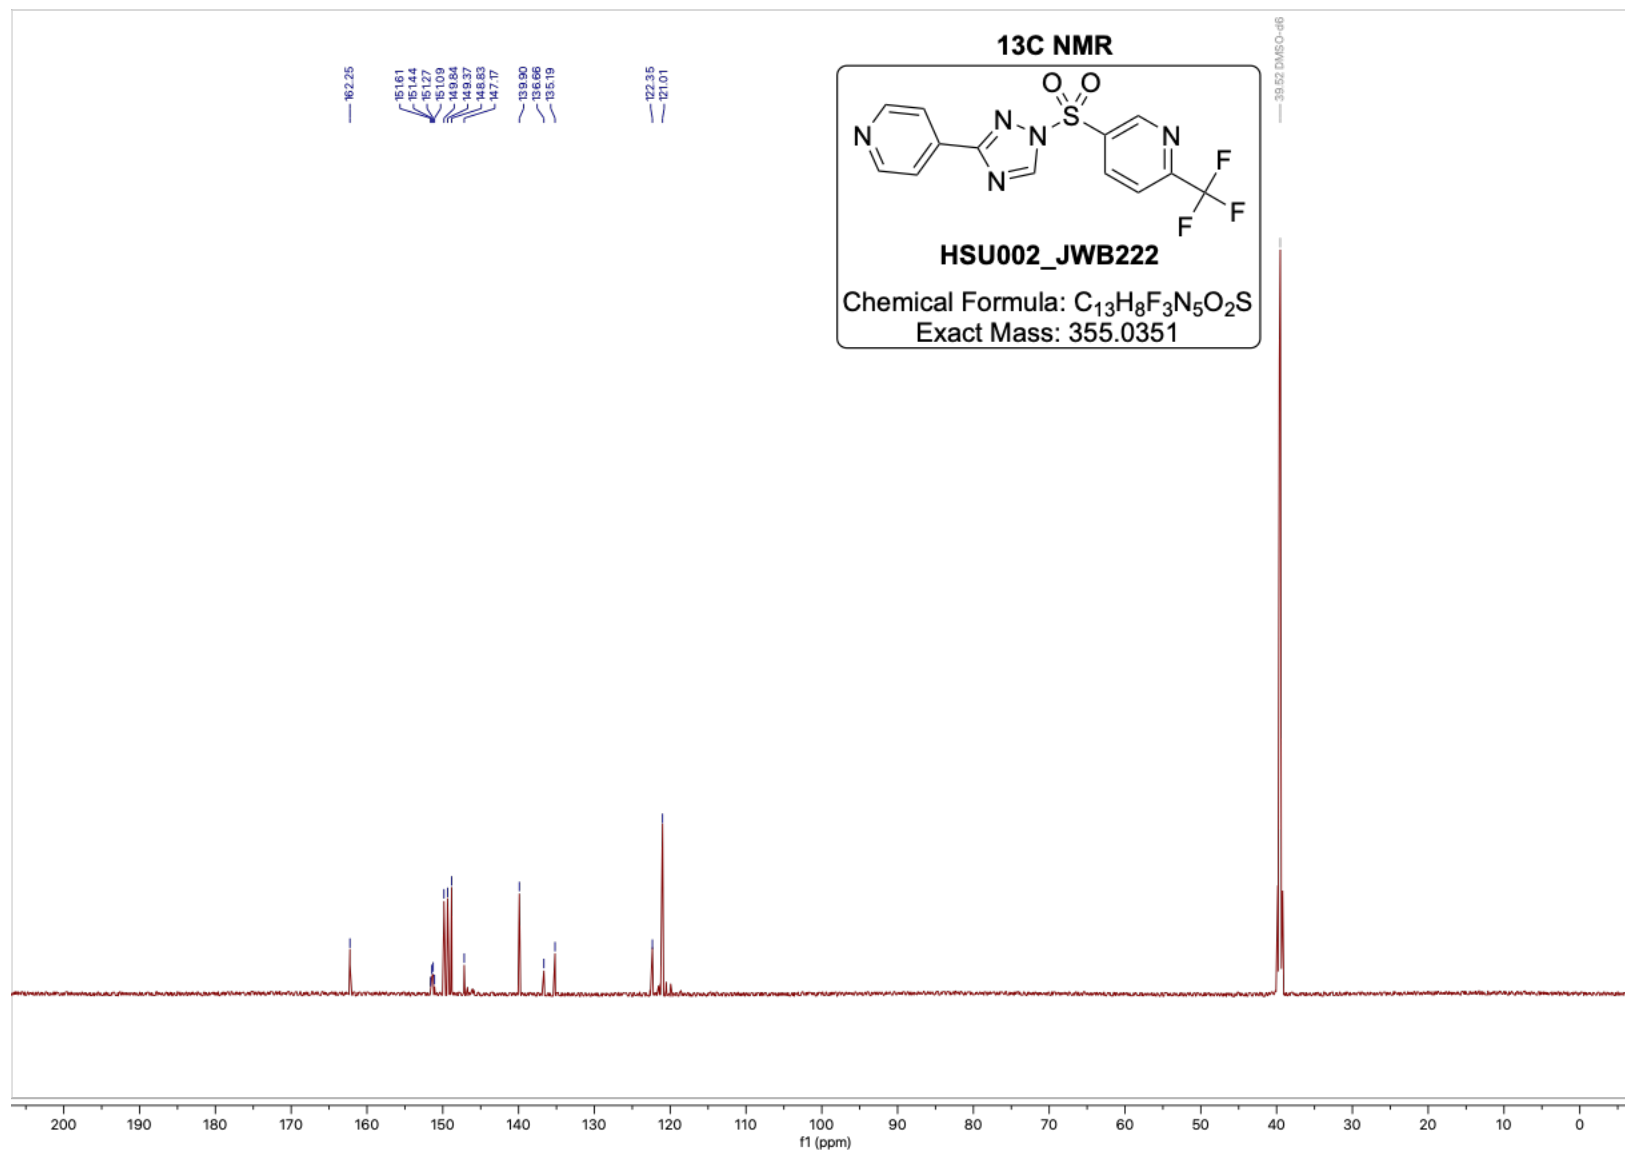

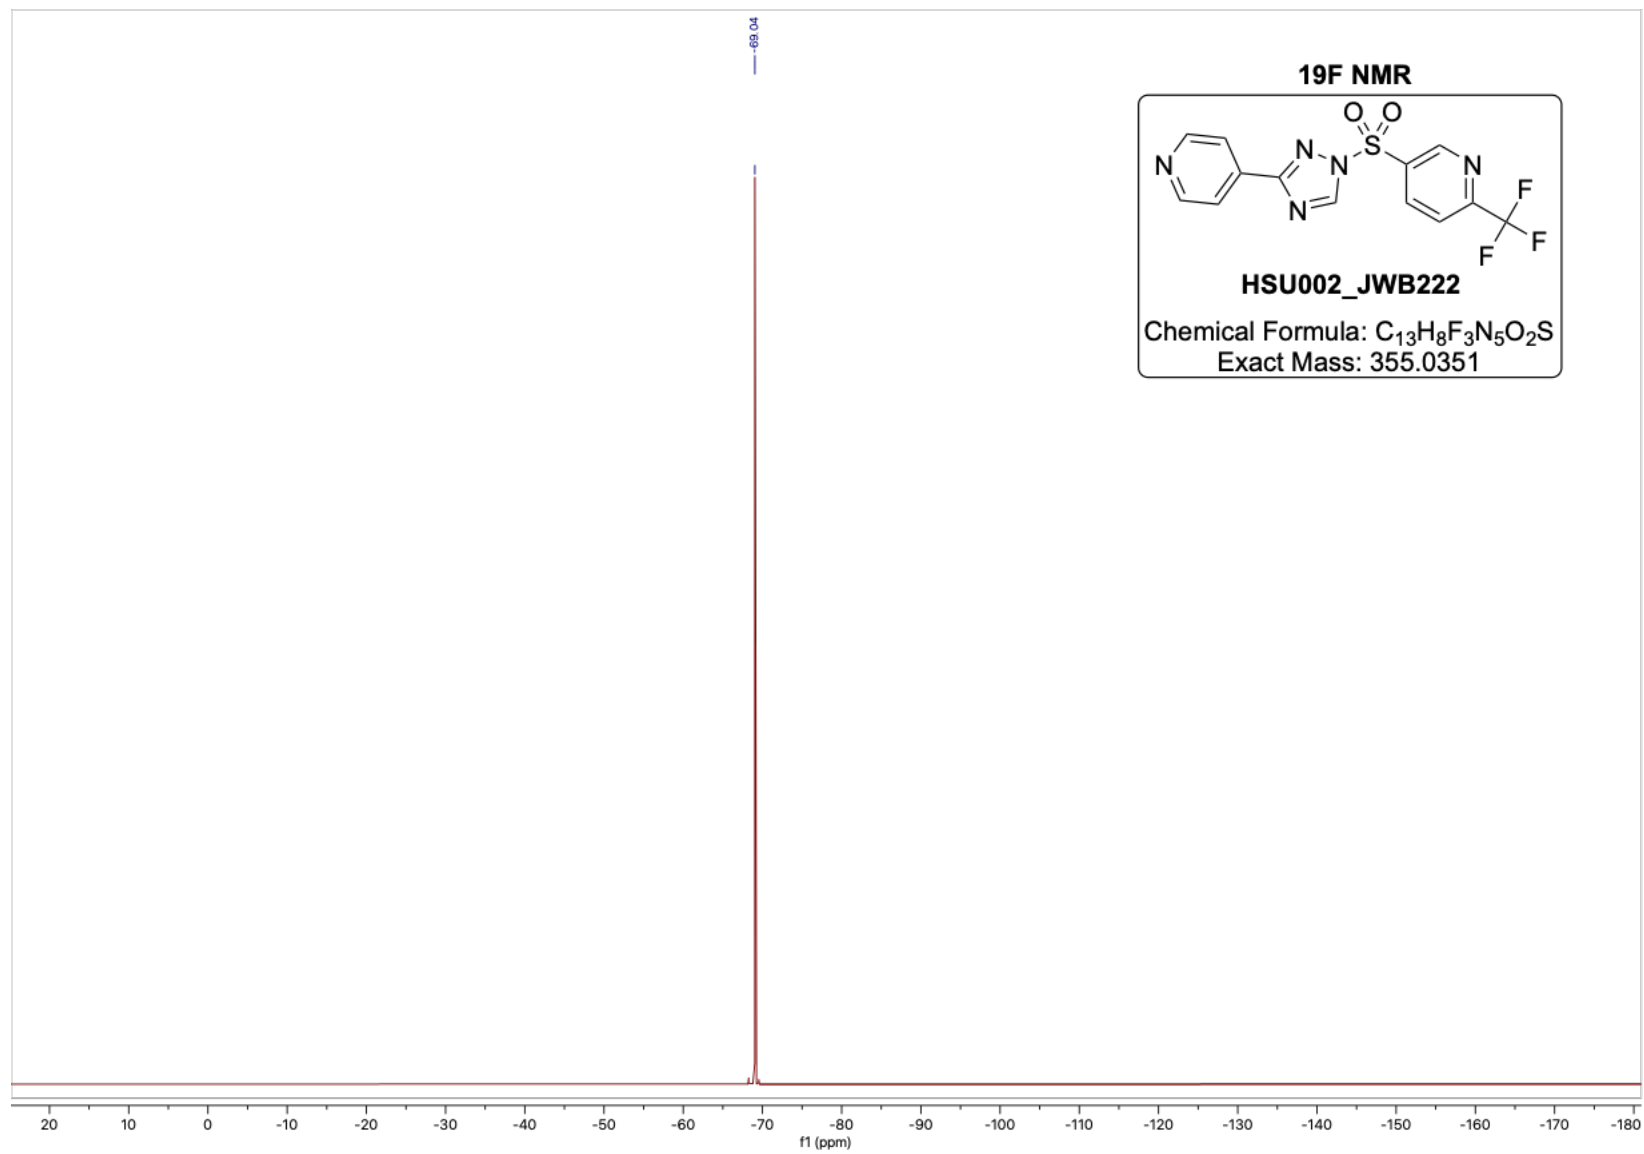

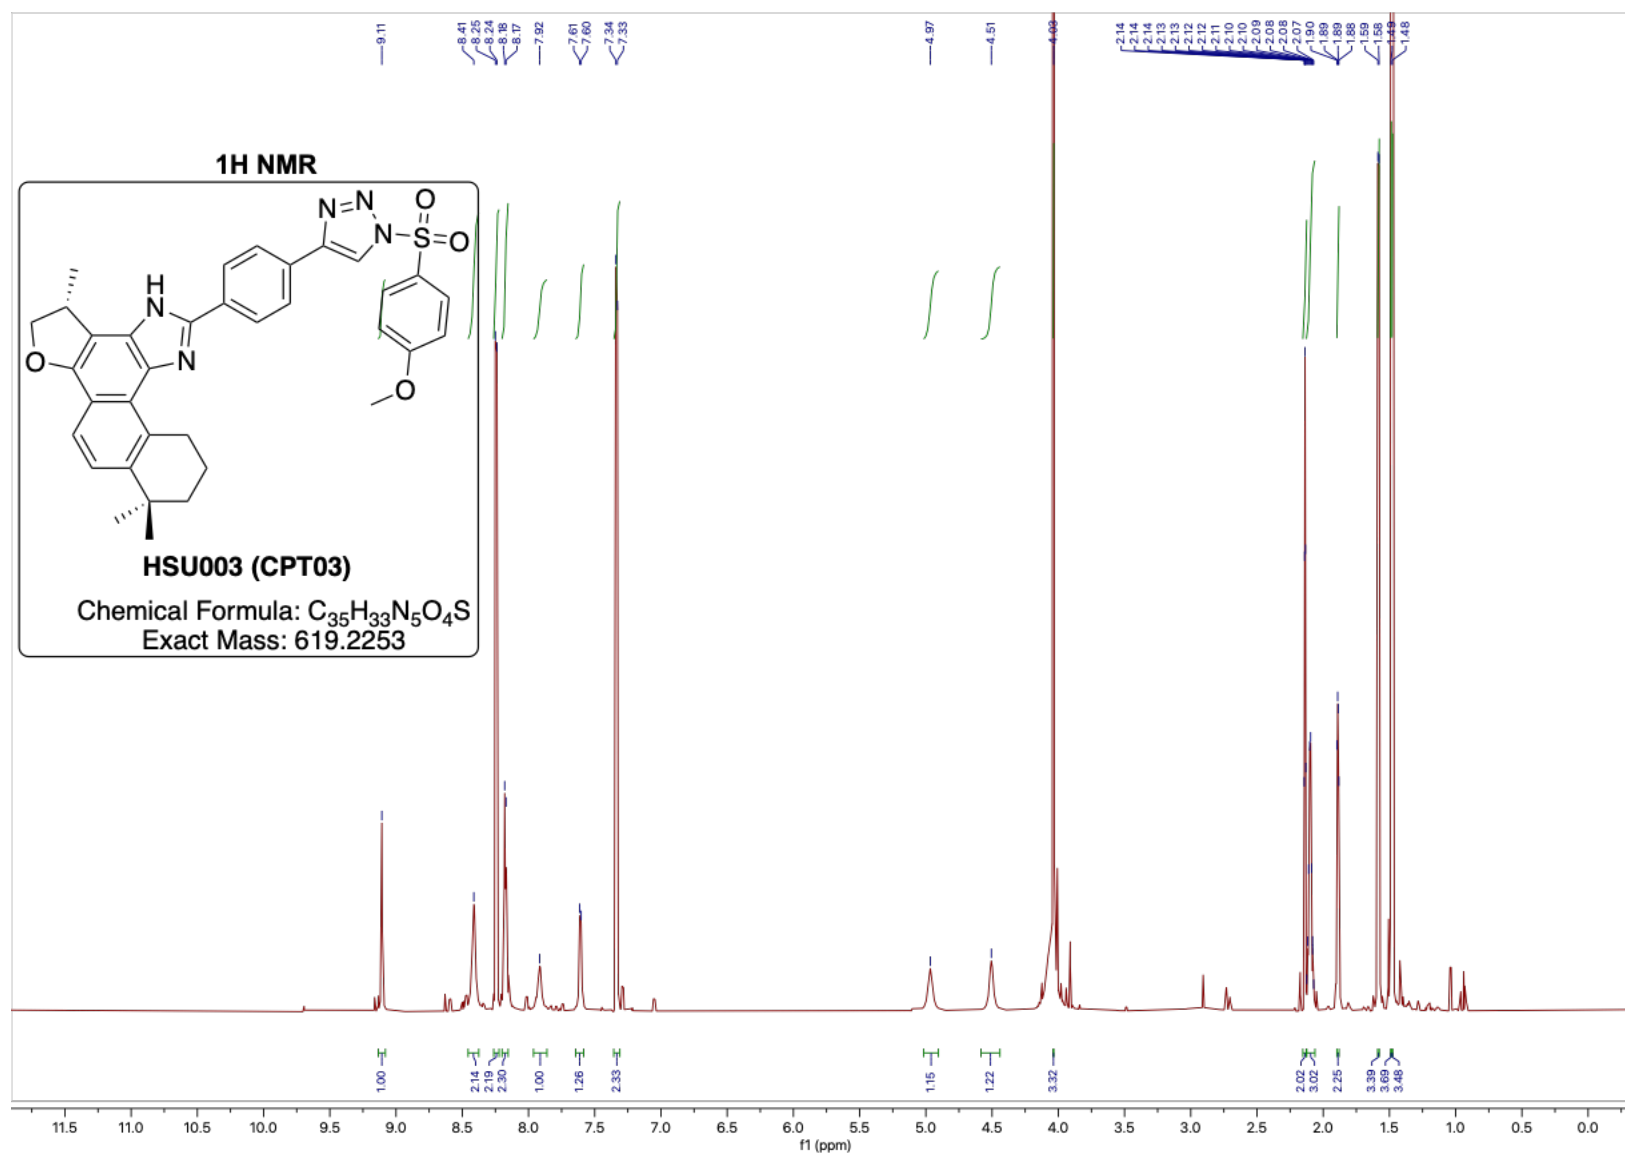

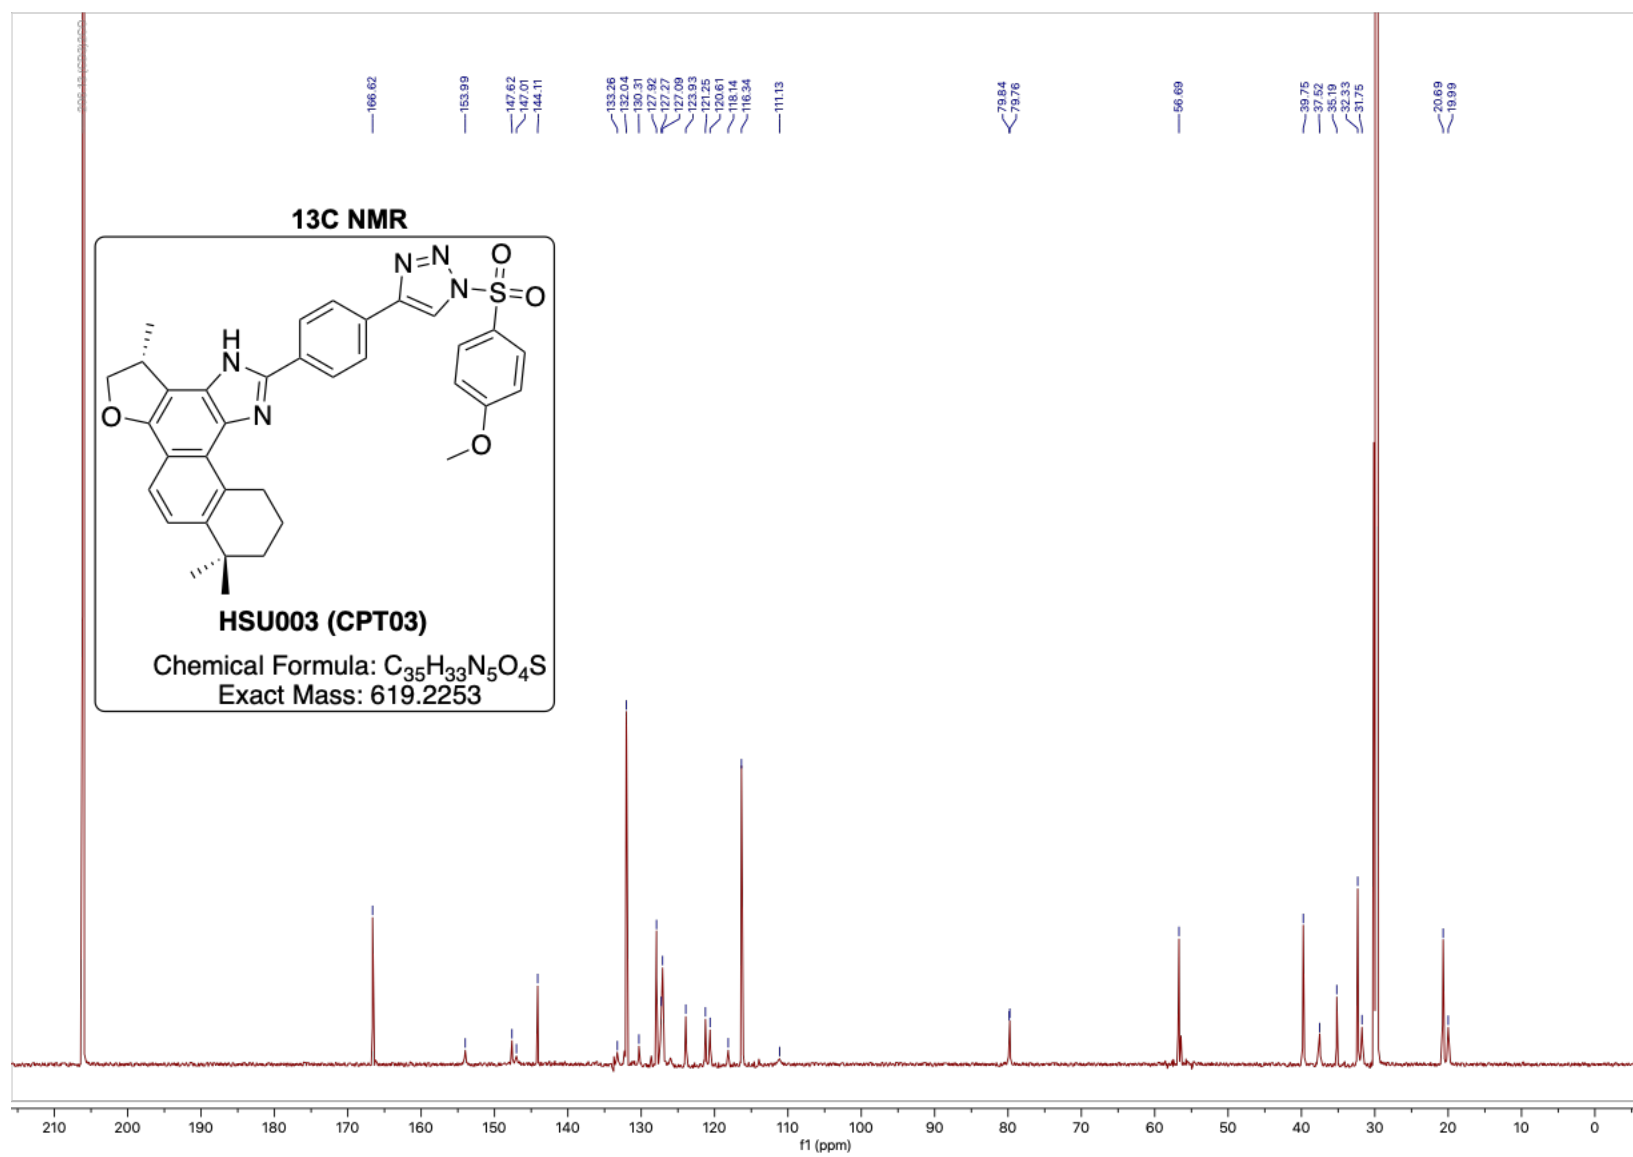



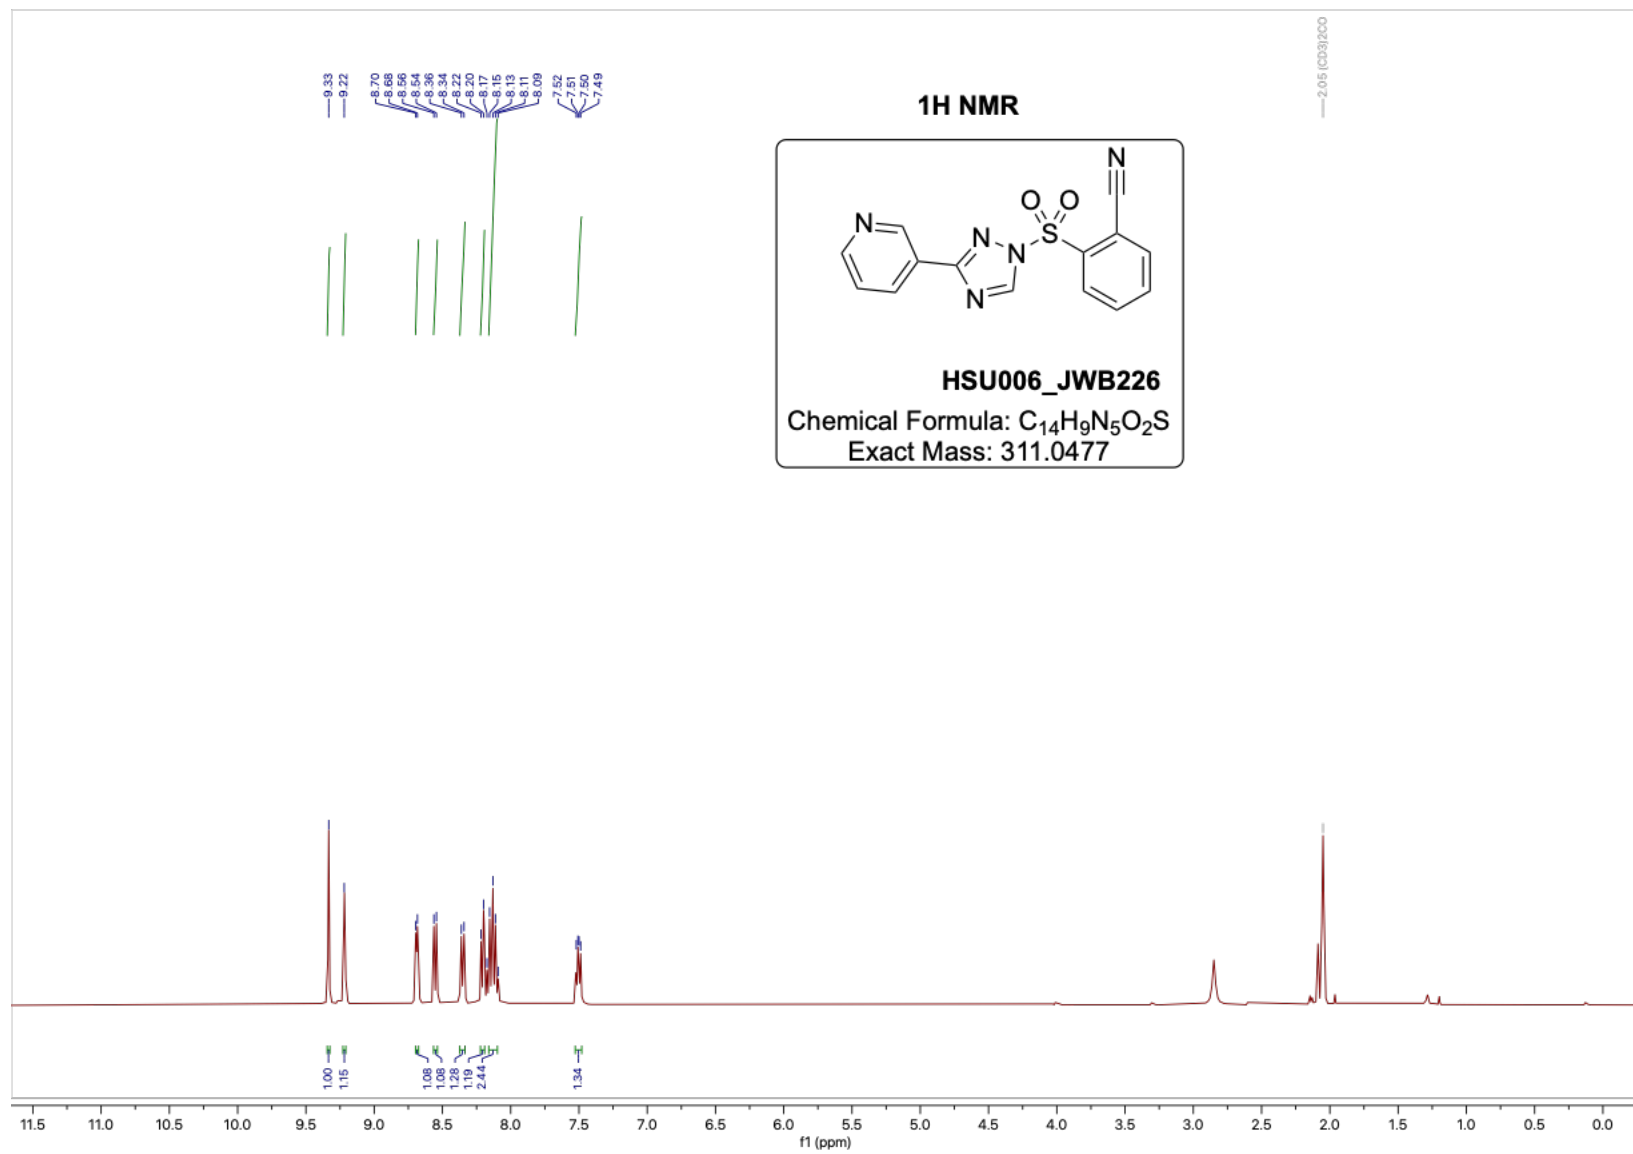

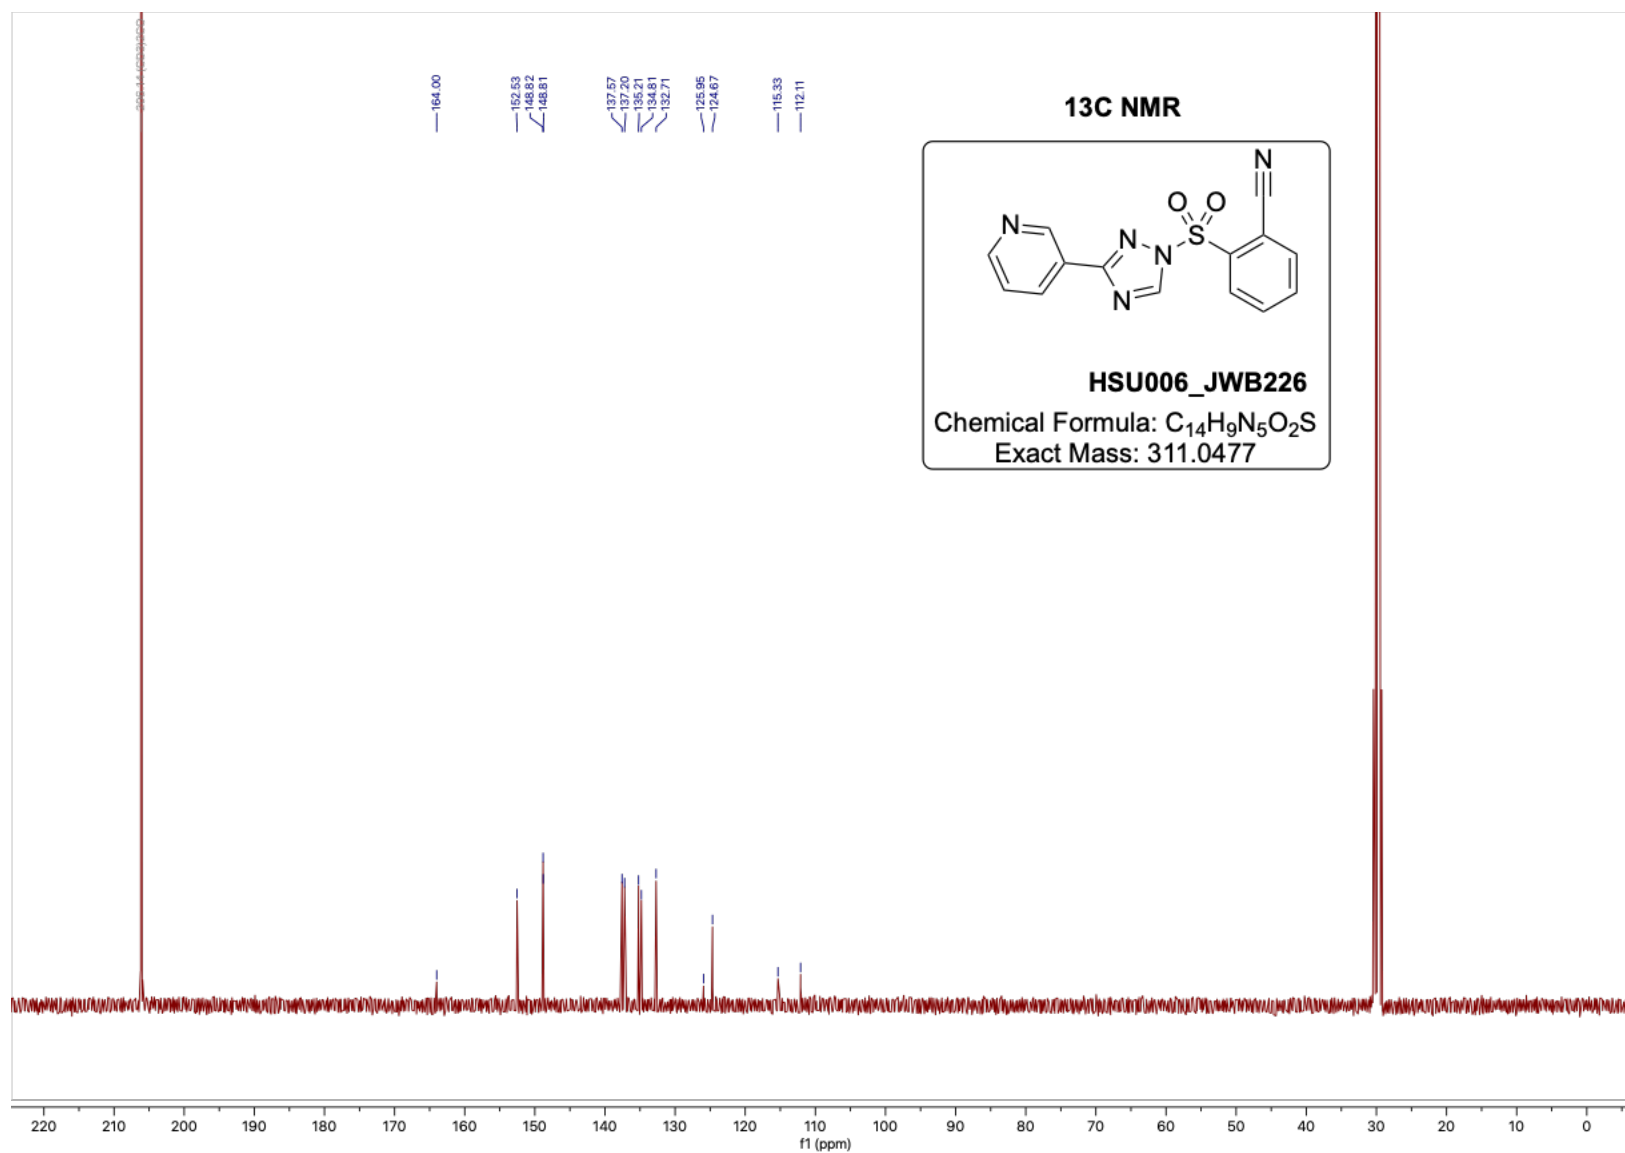

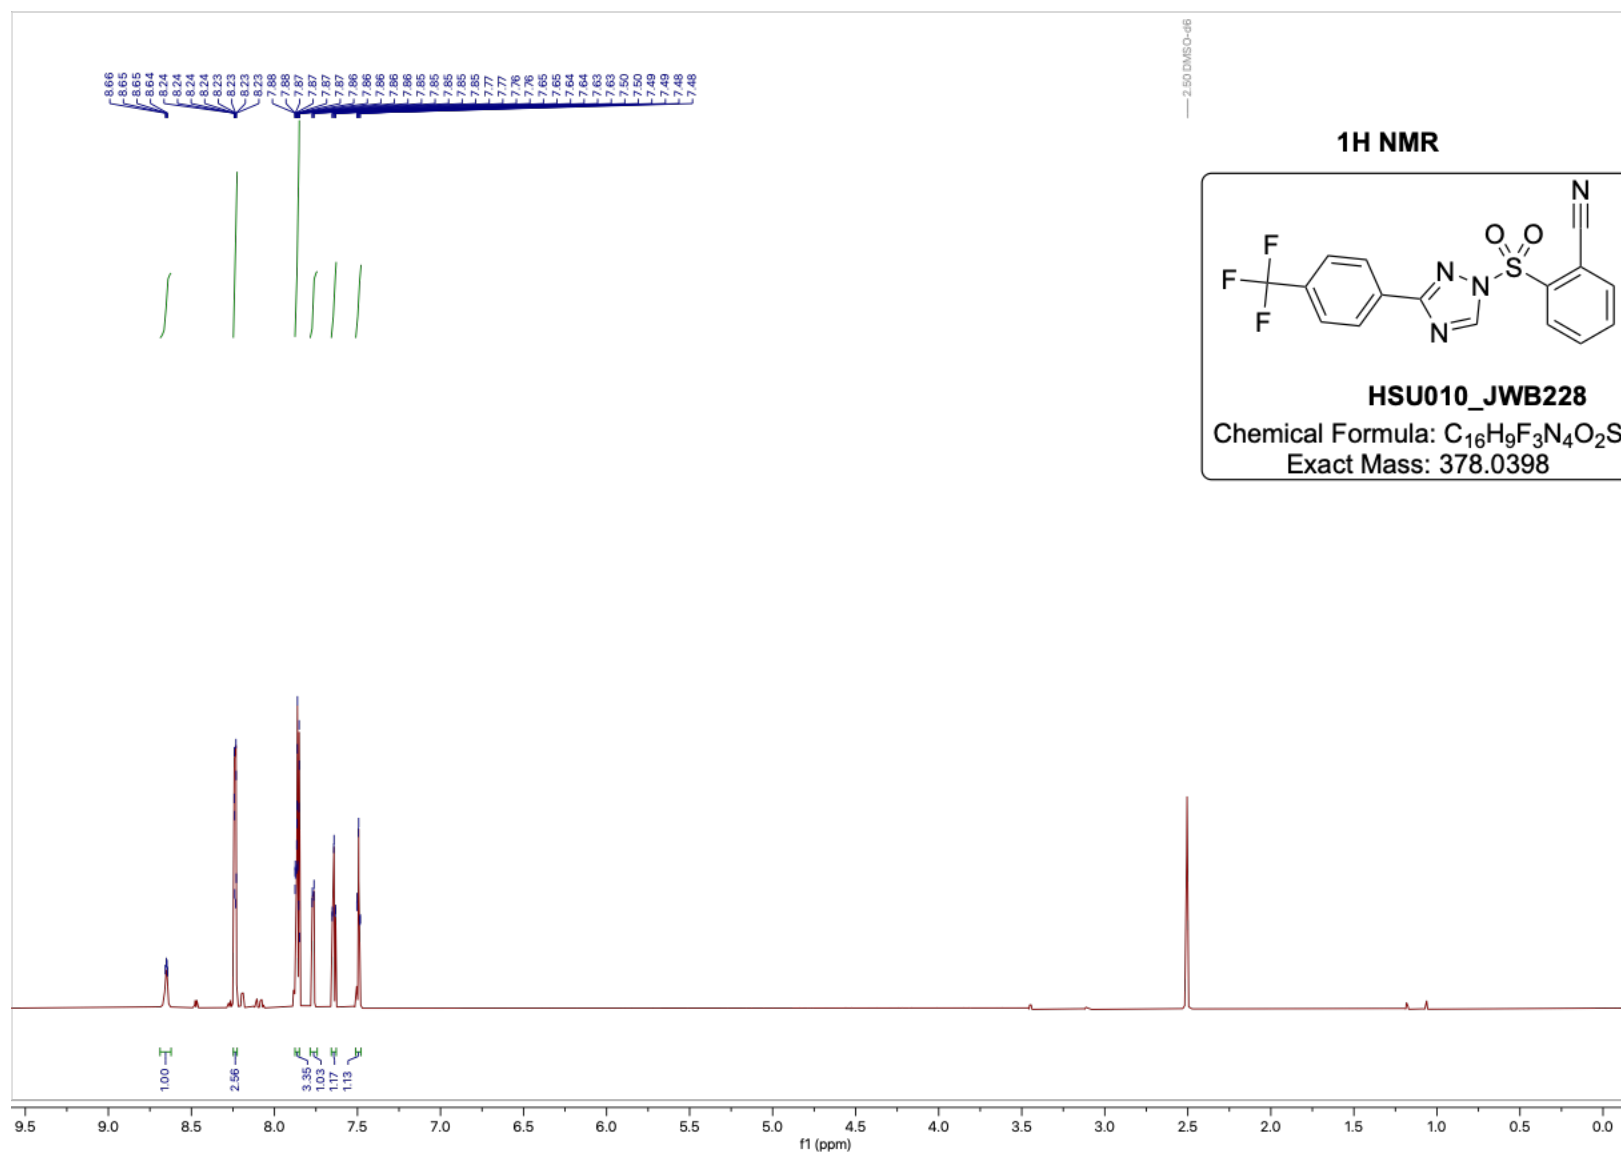

# **<sup>13</sup>C NMR**

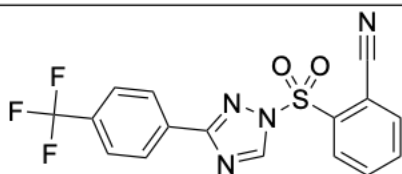

**HSU010\_JWB228**

Chemical Formula: C<sub>16</sub>H<sub>9</sub>F<sub>3</sub>N<sub>4</sub>O<sub>2</sub>S  
Exact Mass: 378.0398

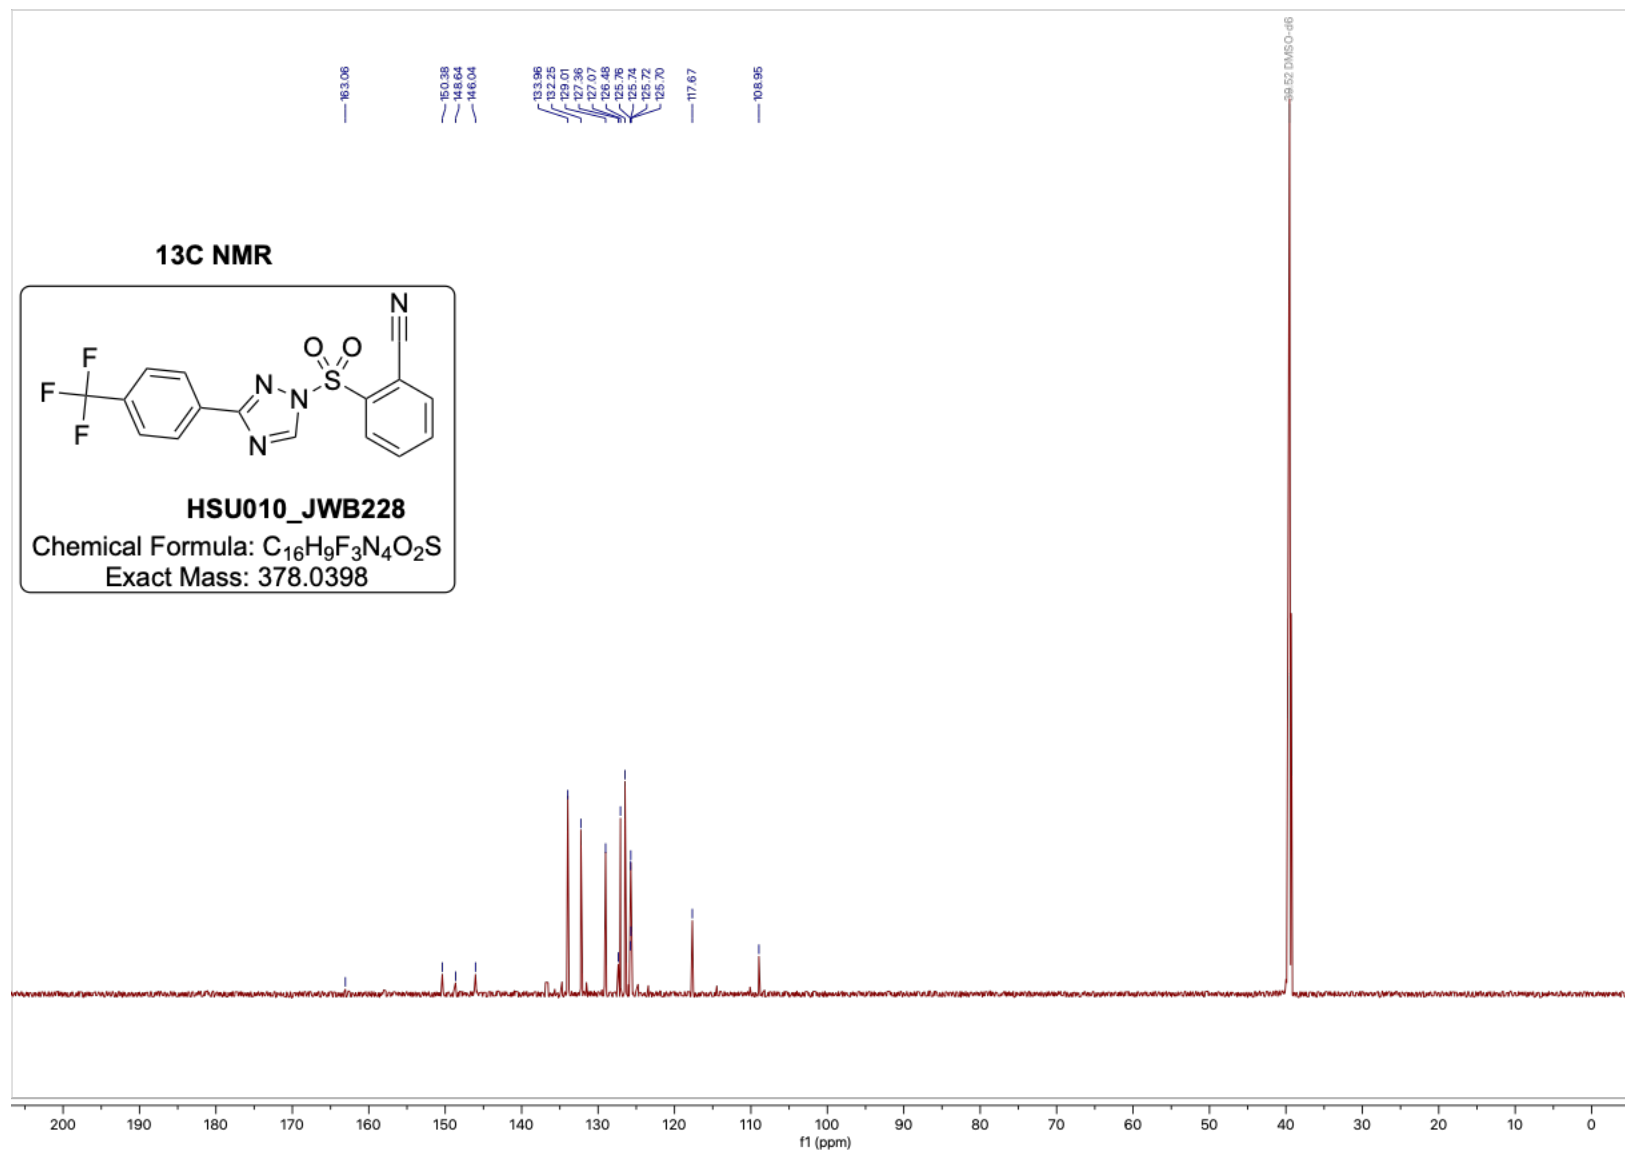

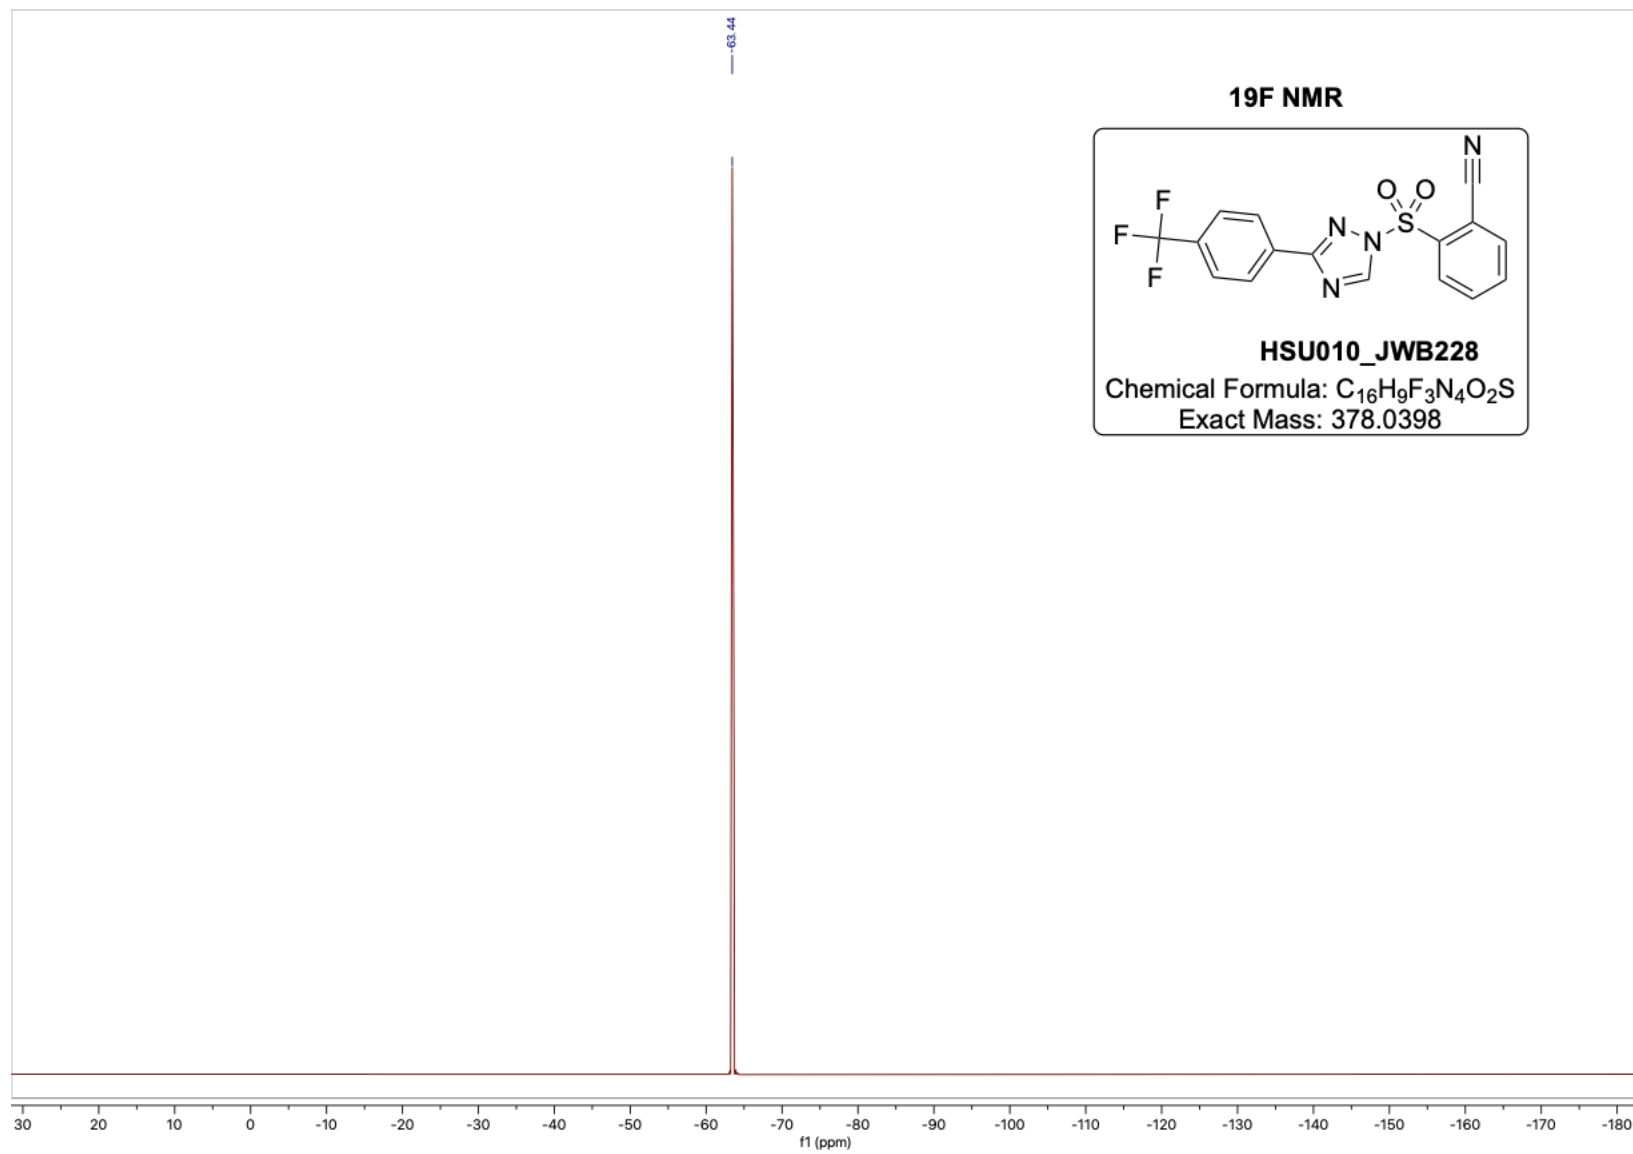

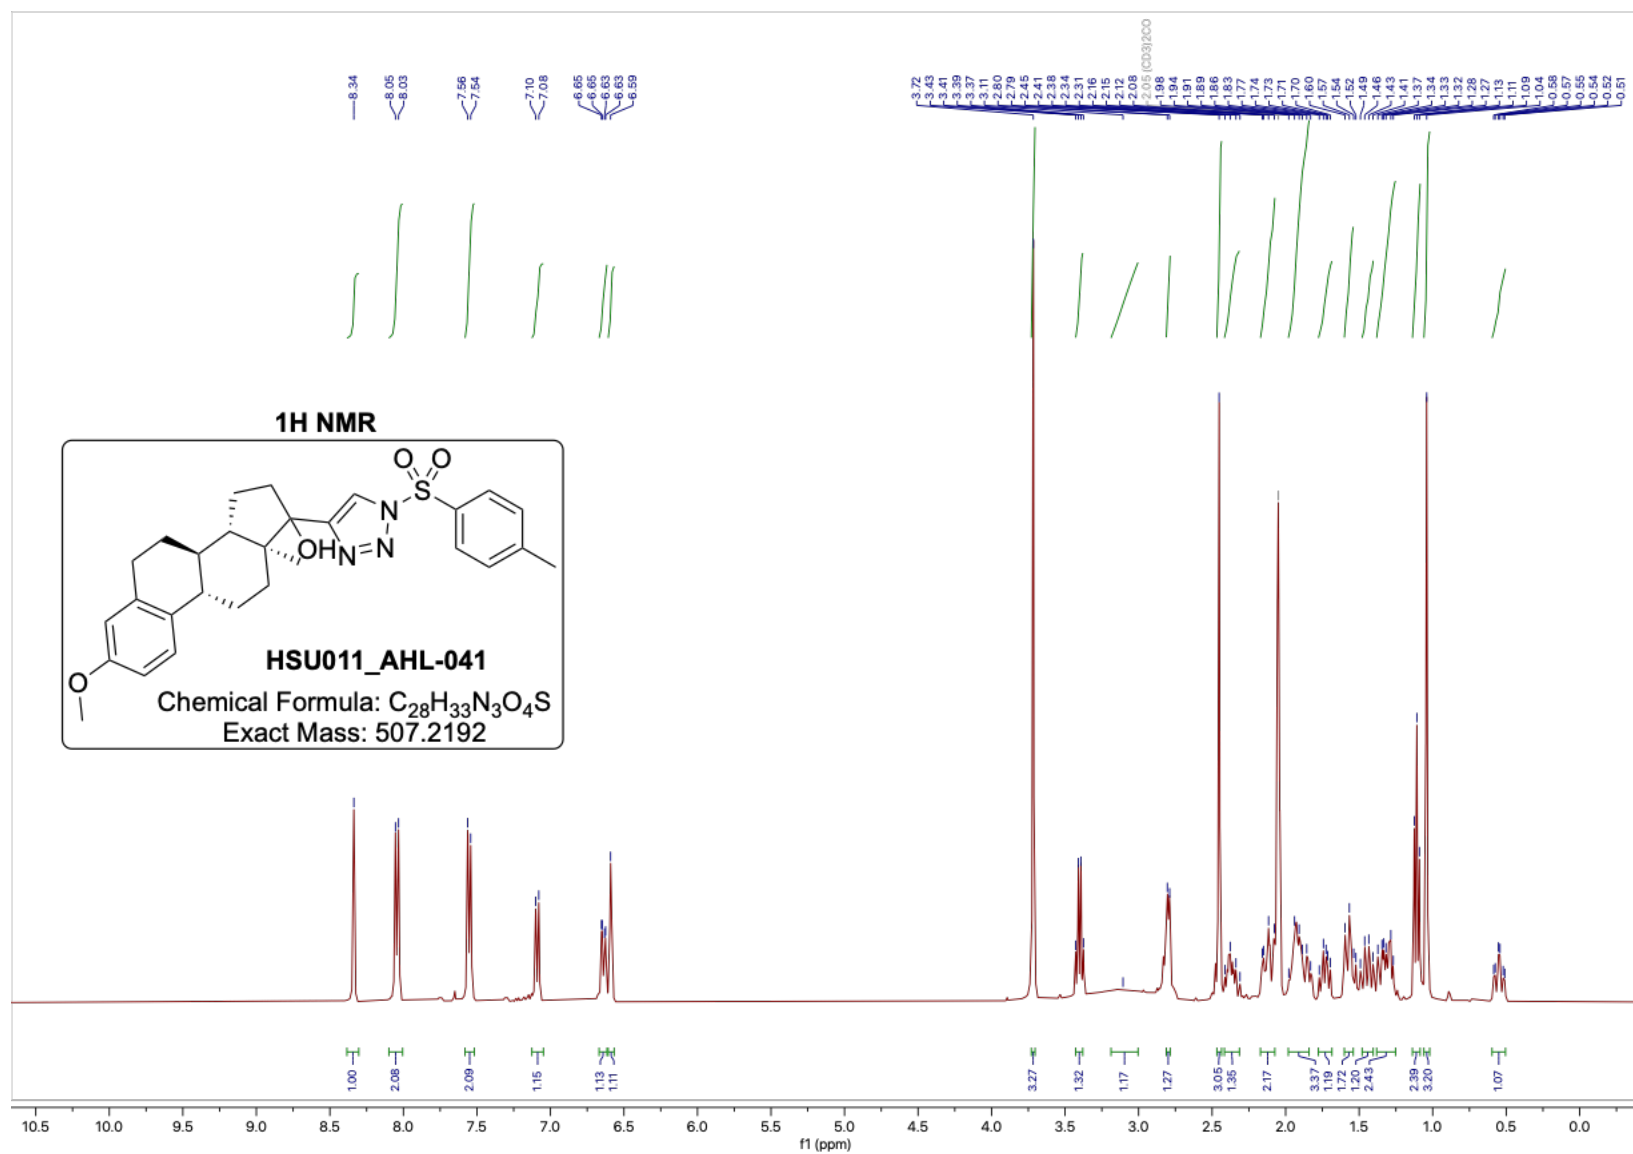

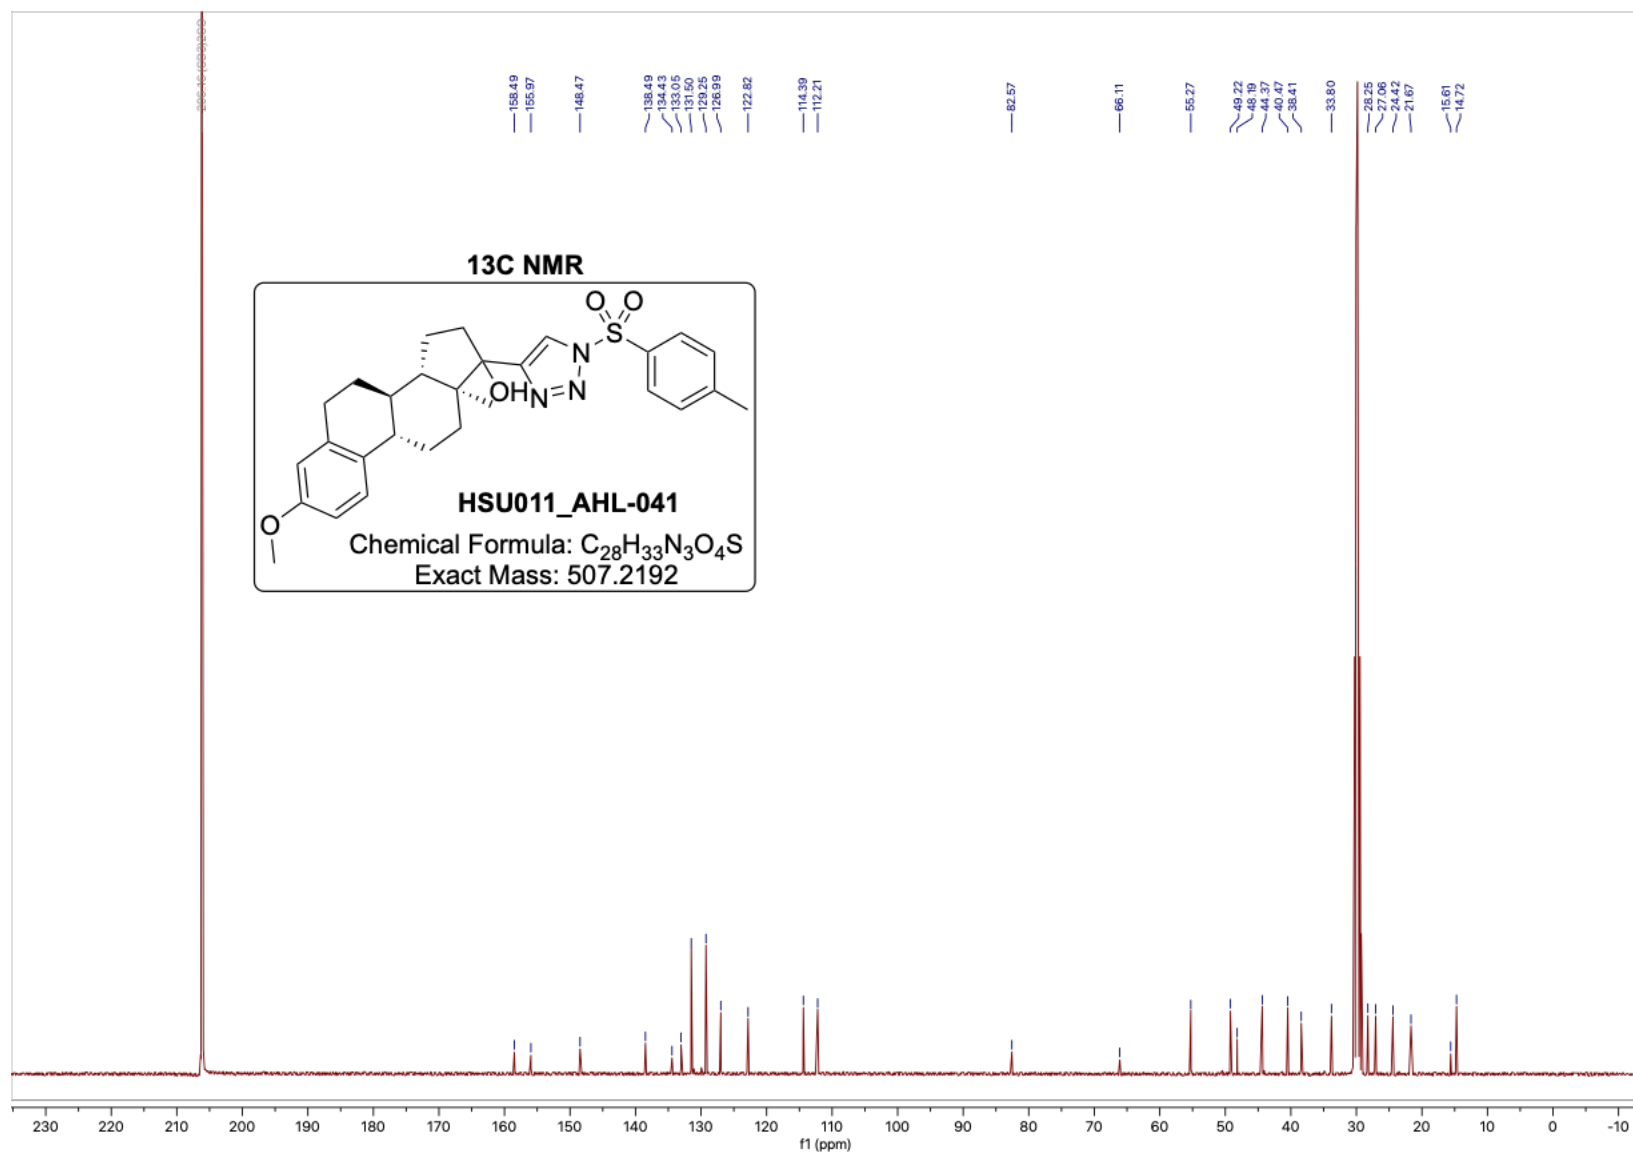

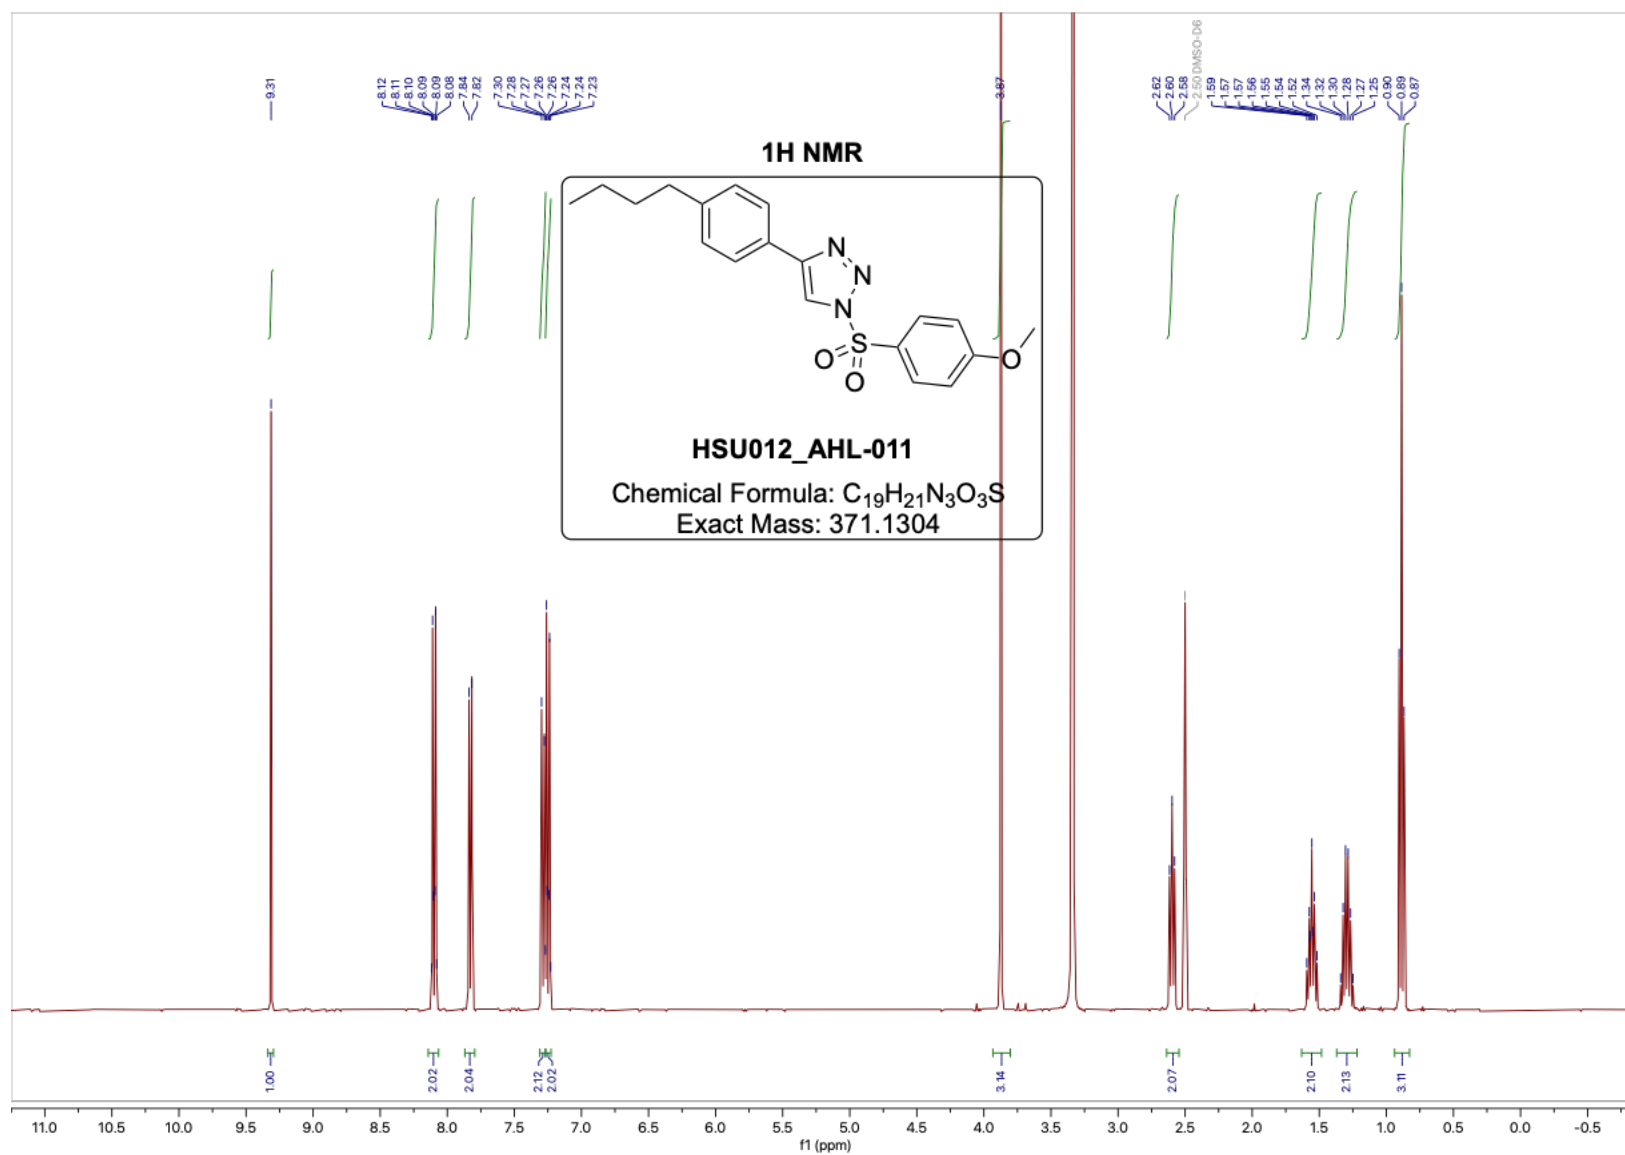



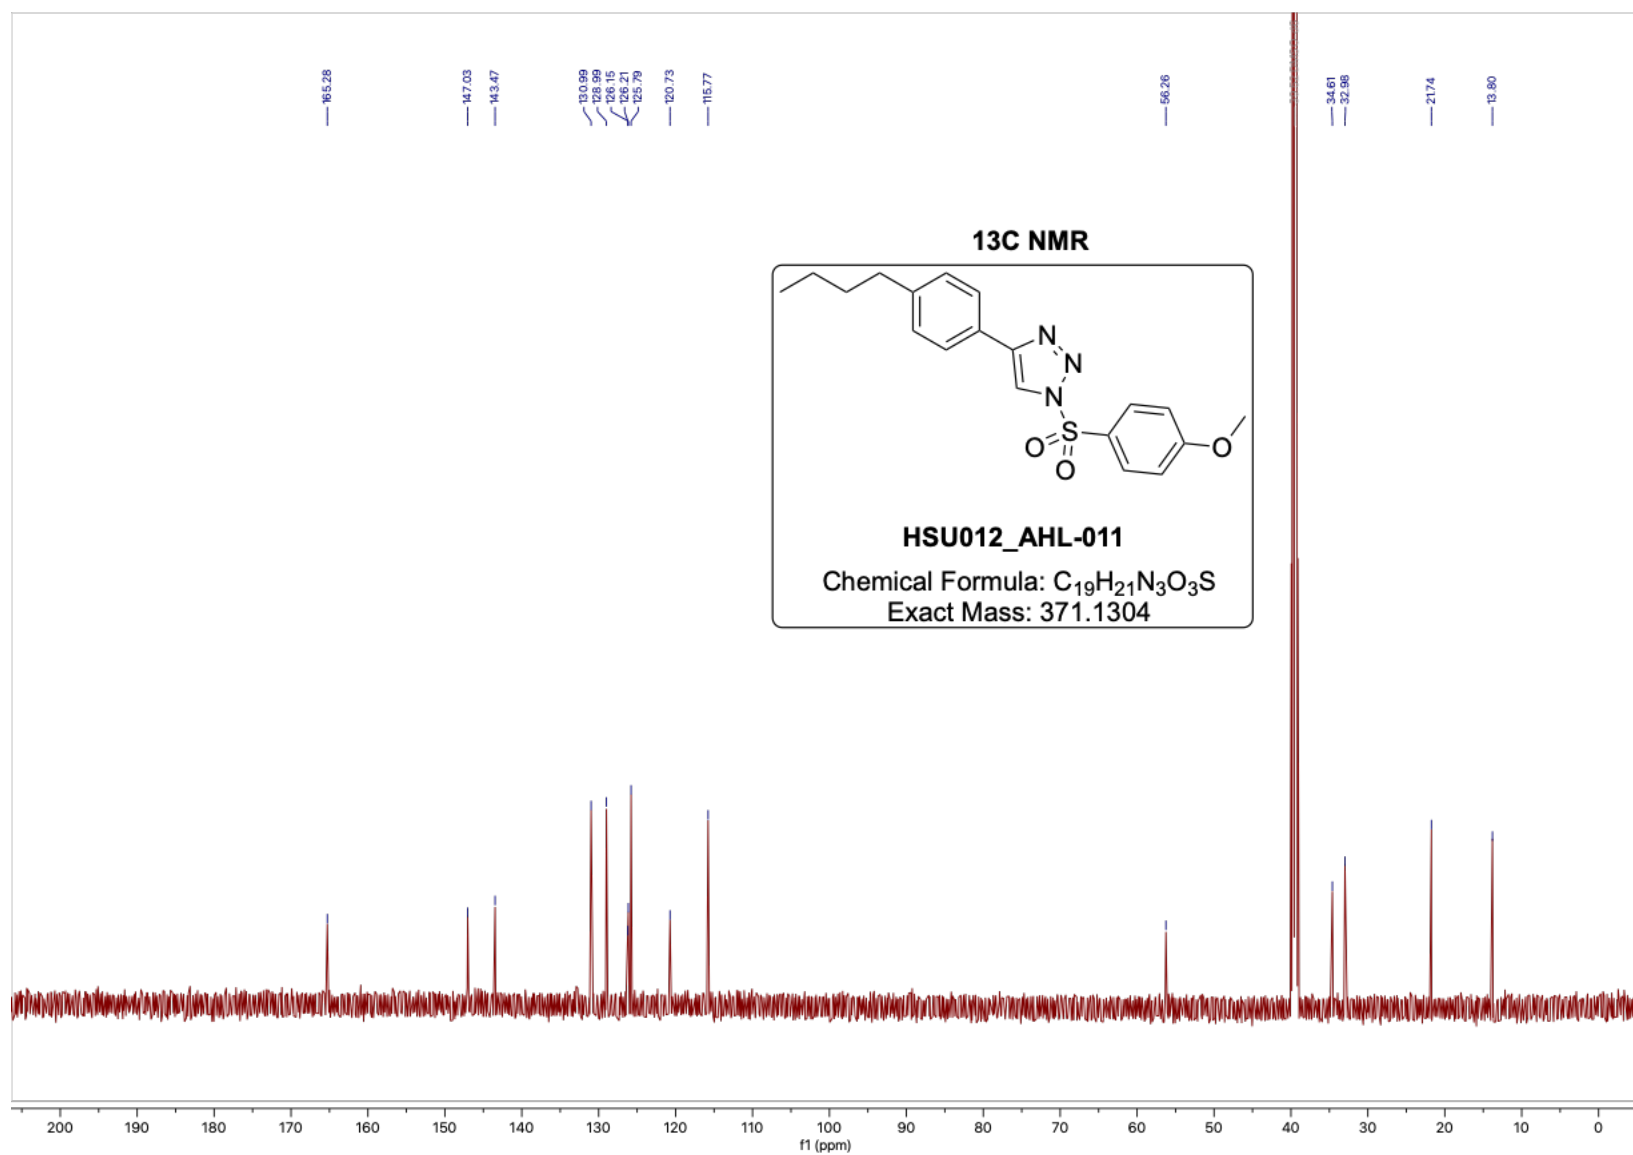

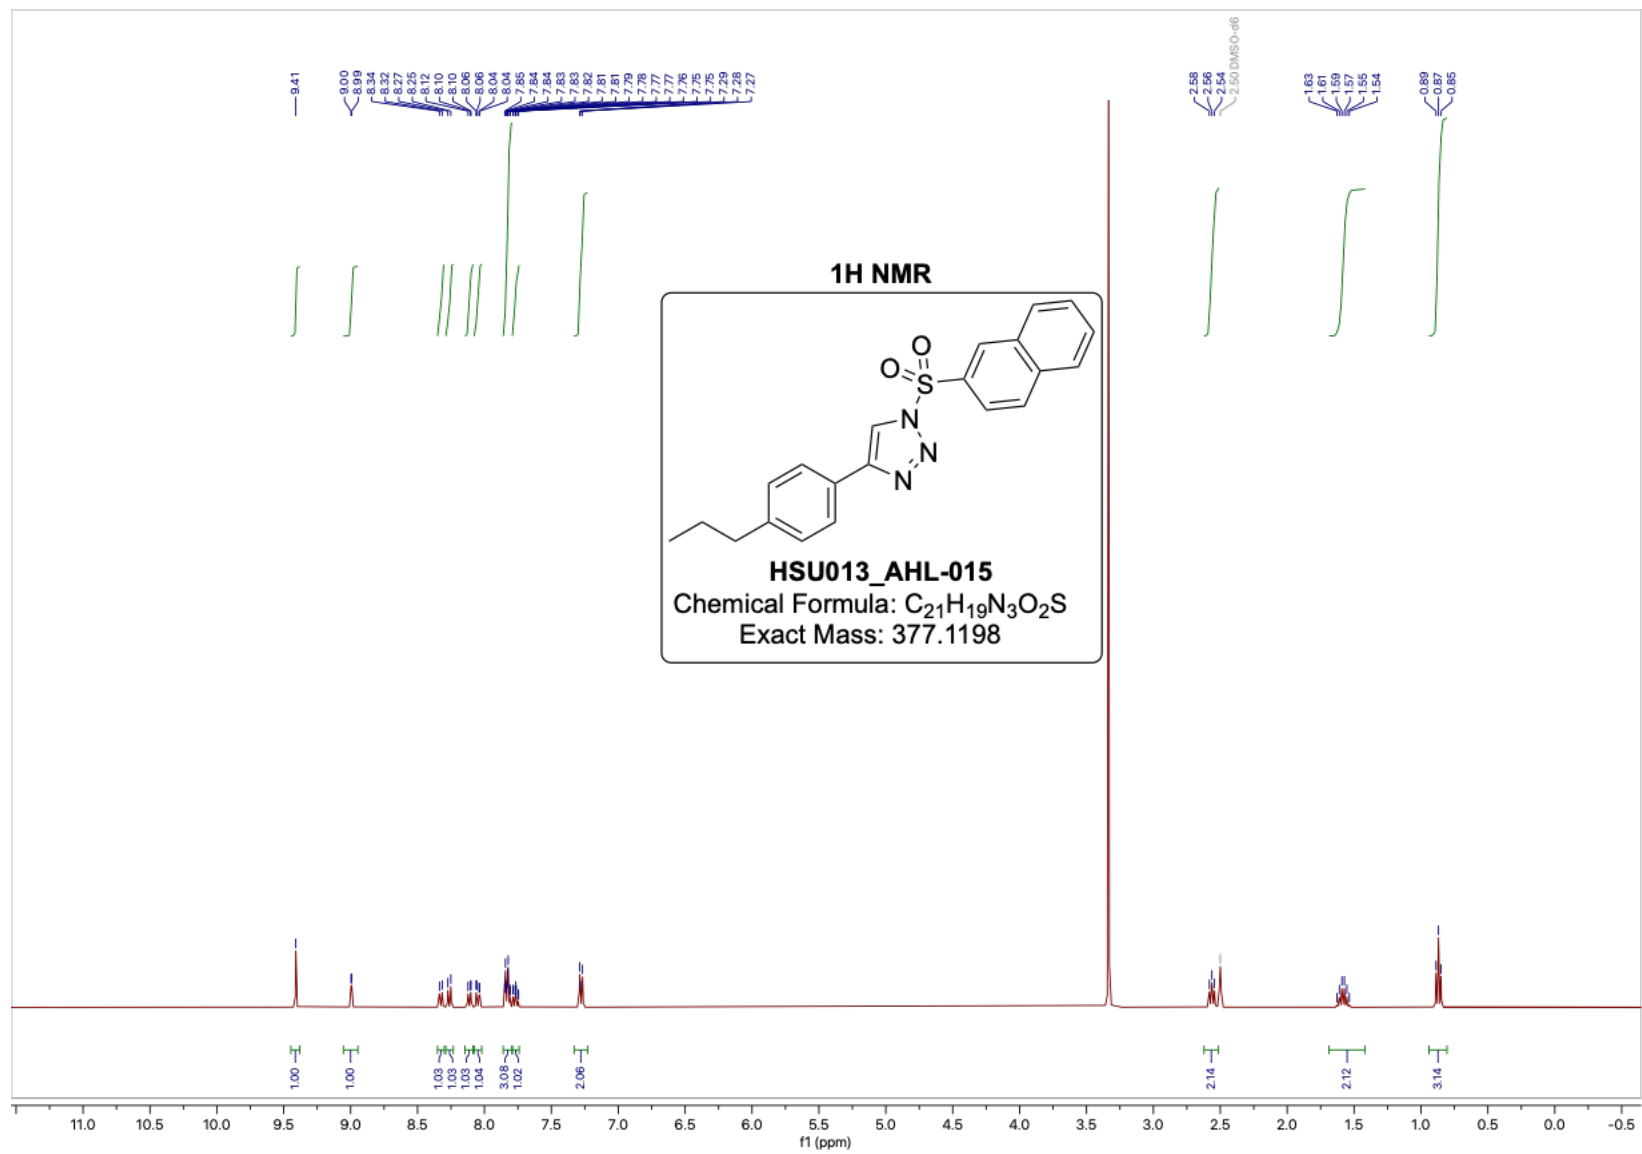

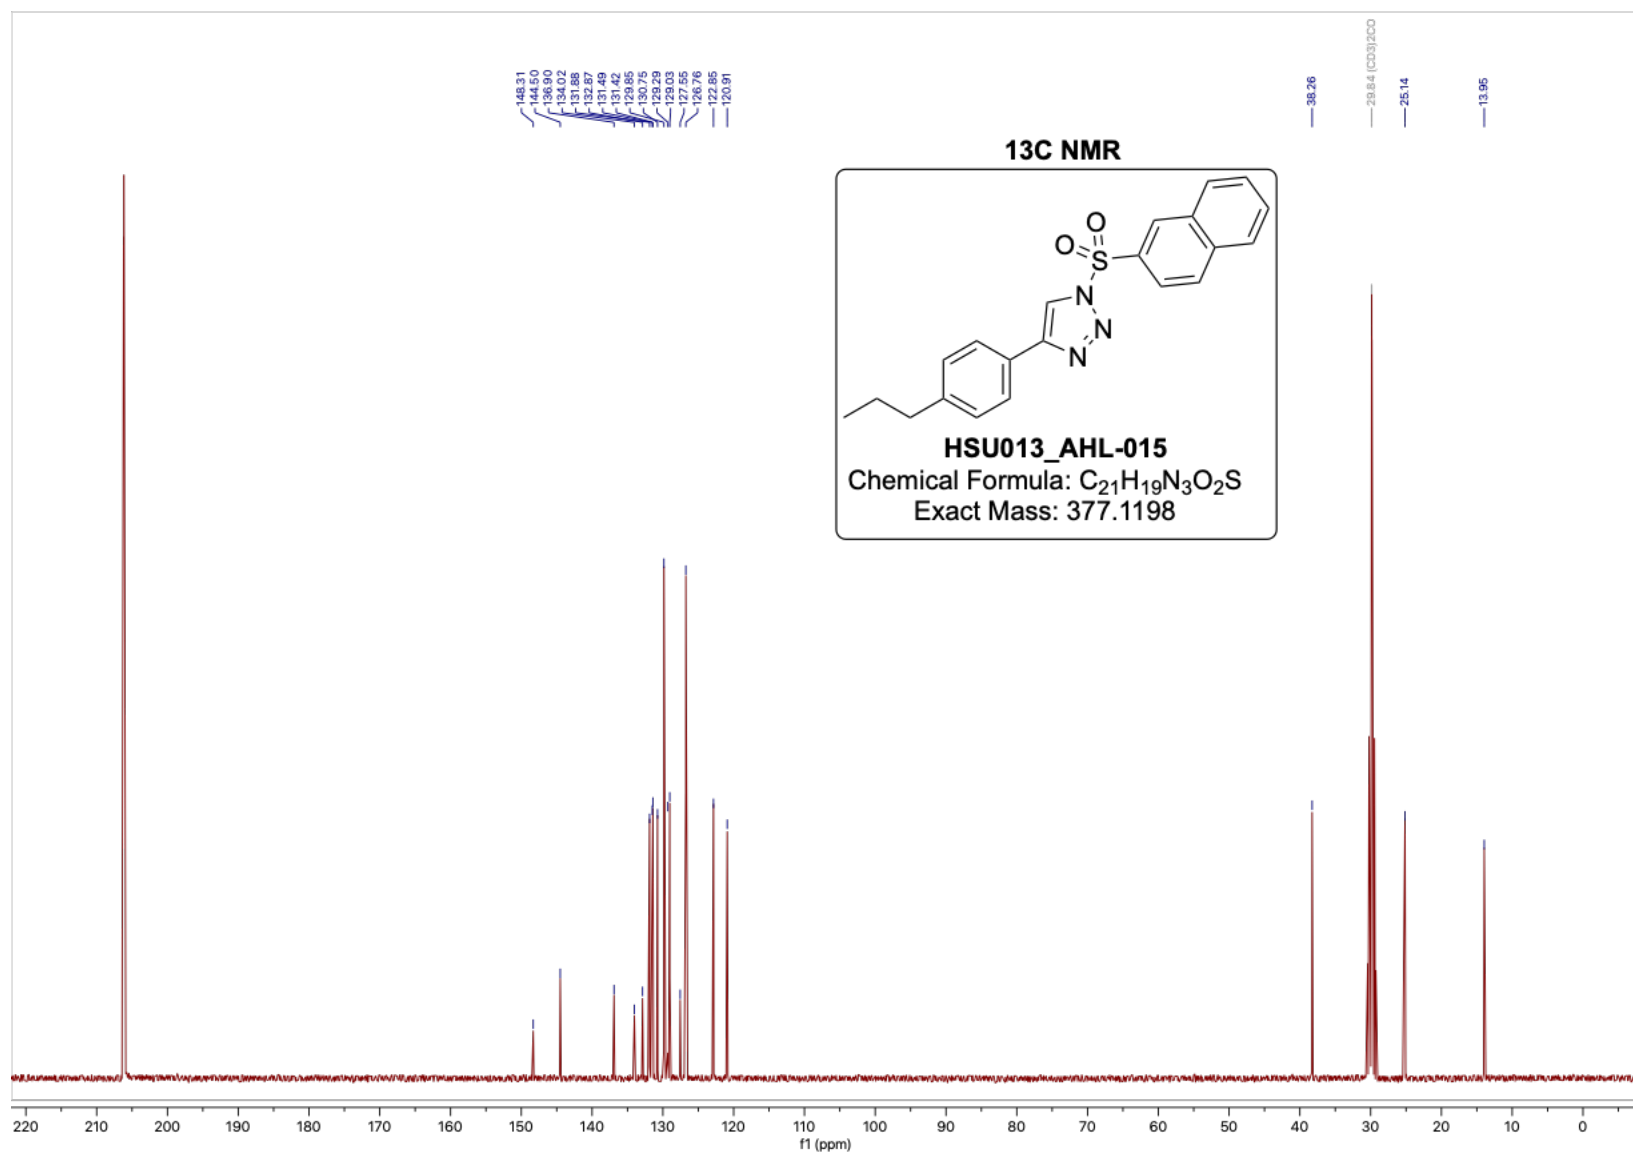

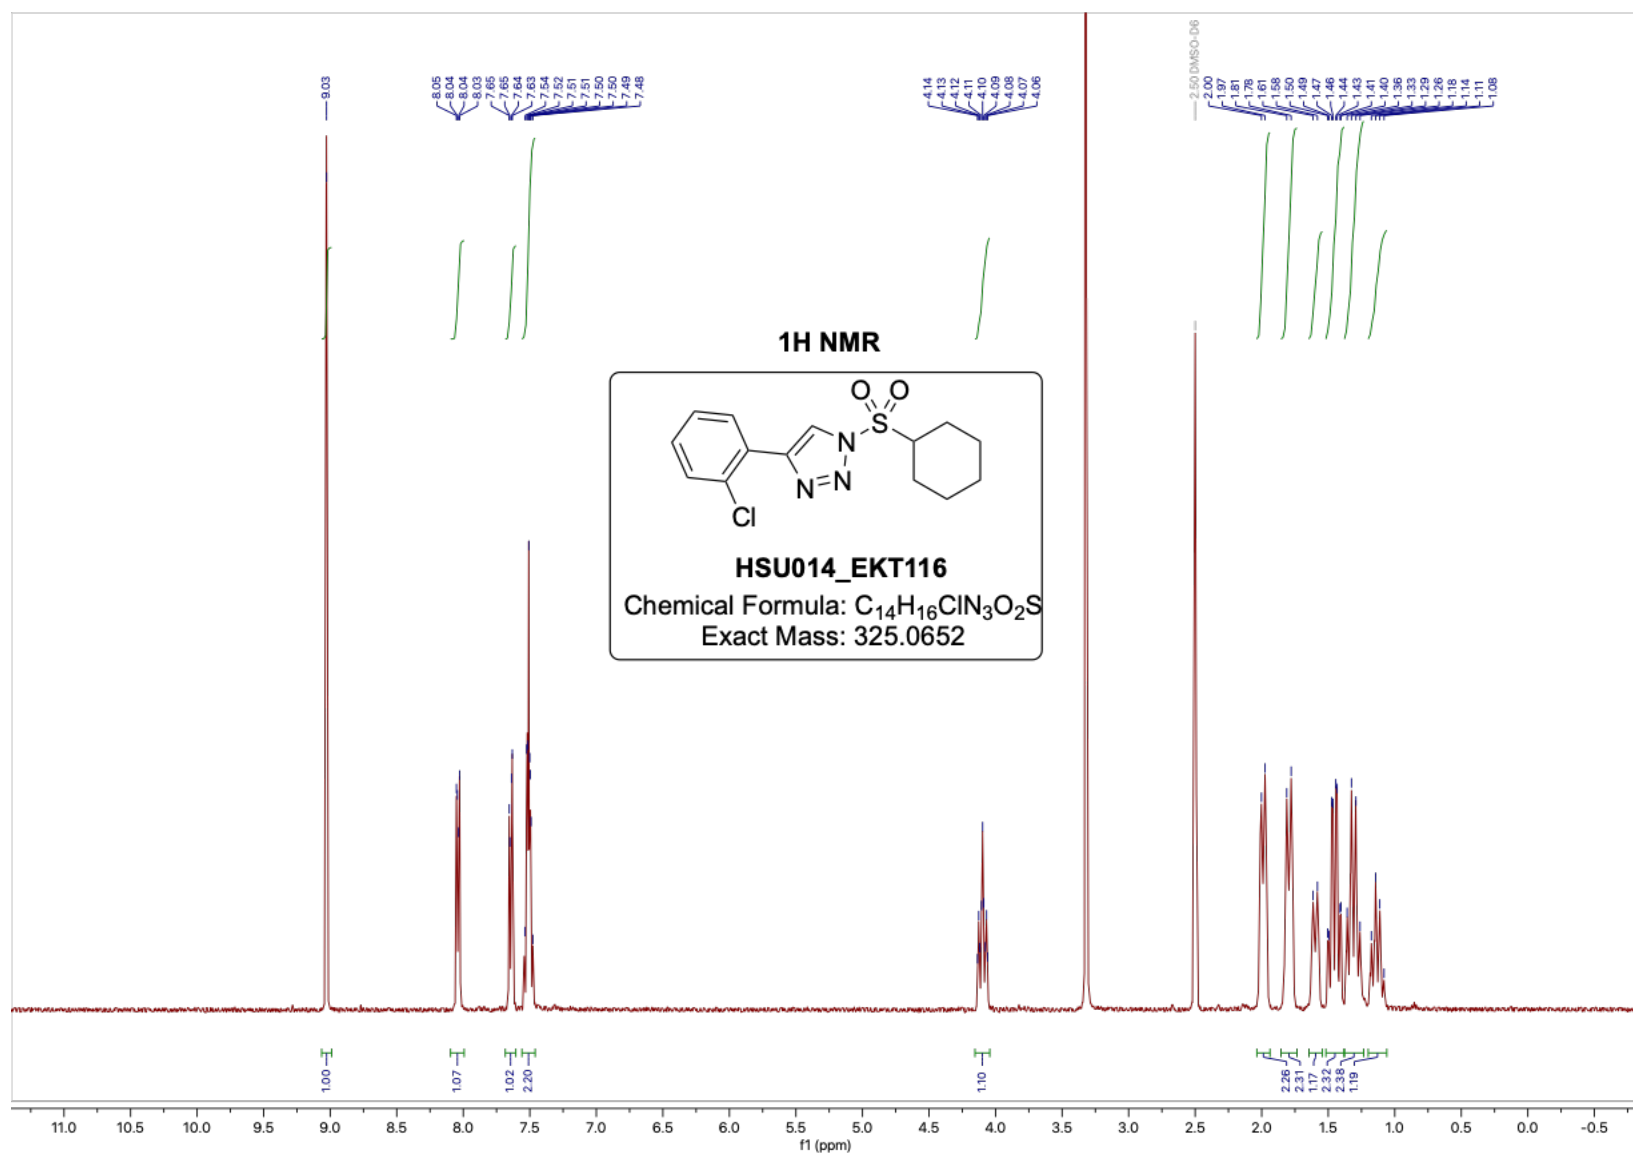

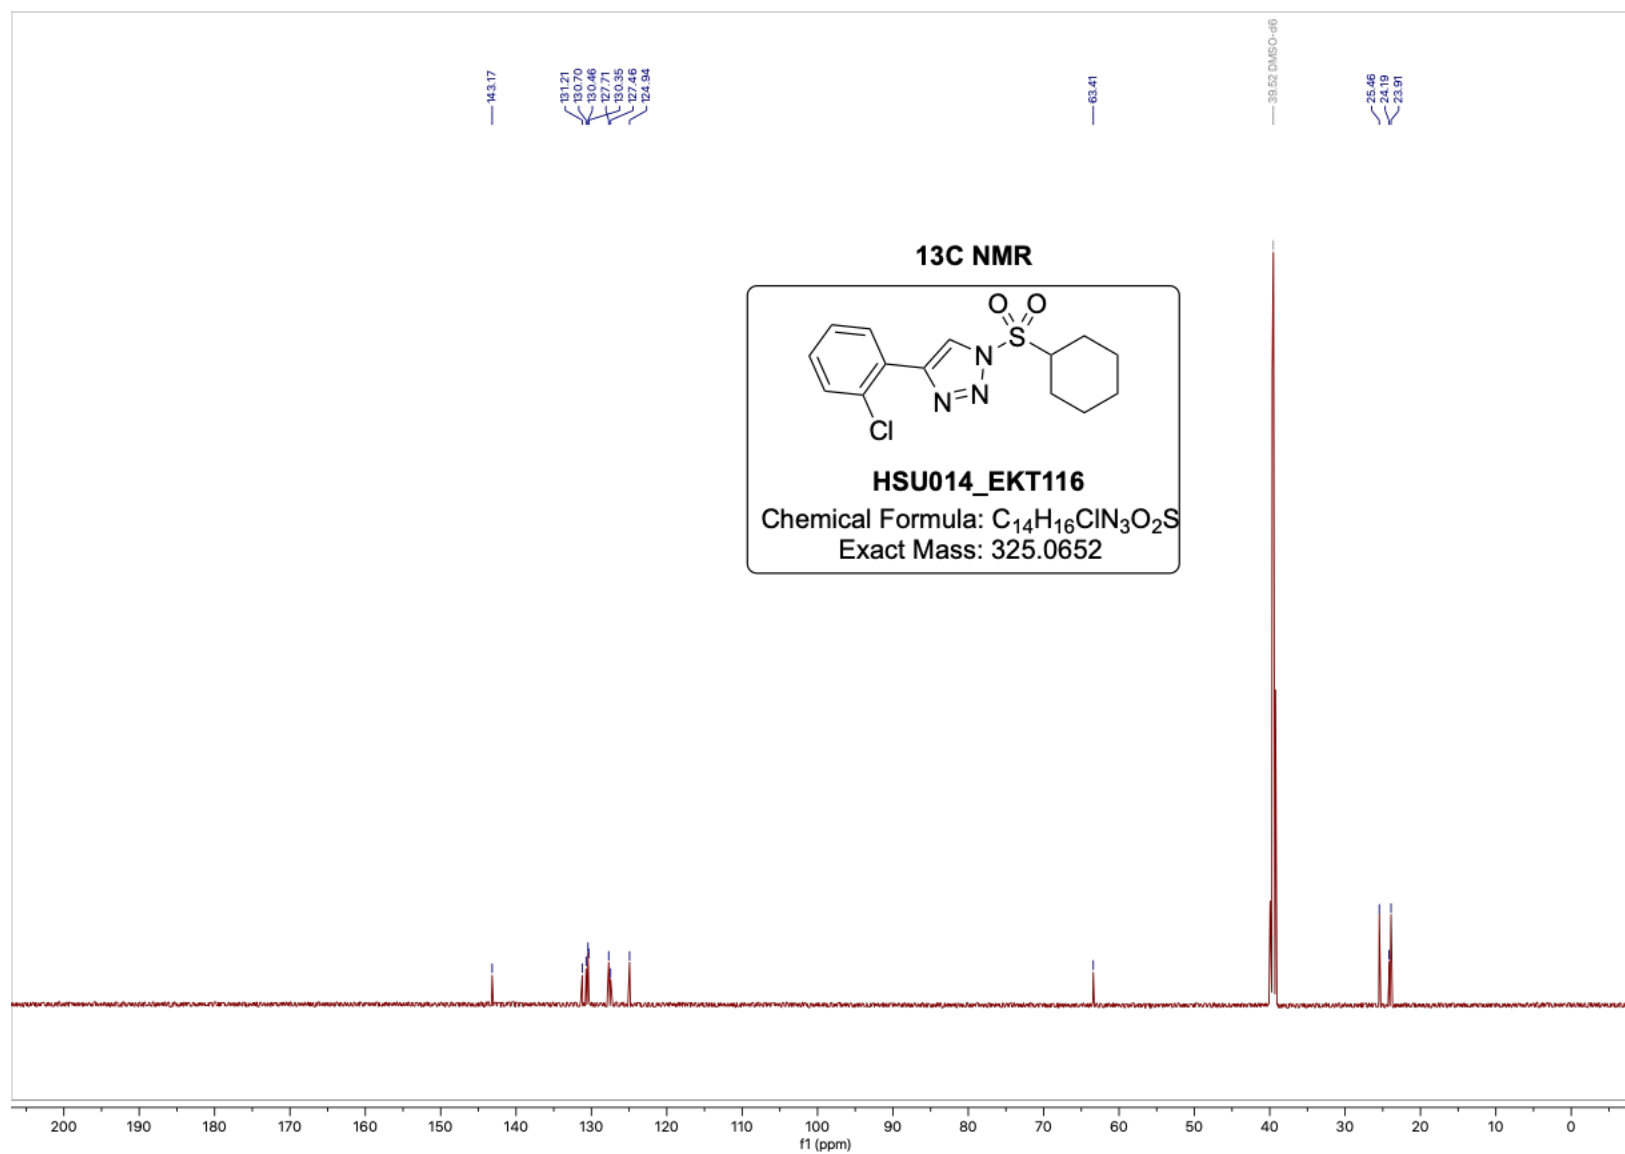

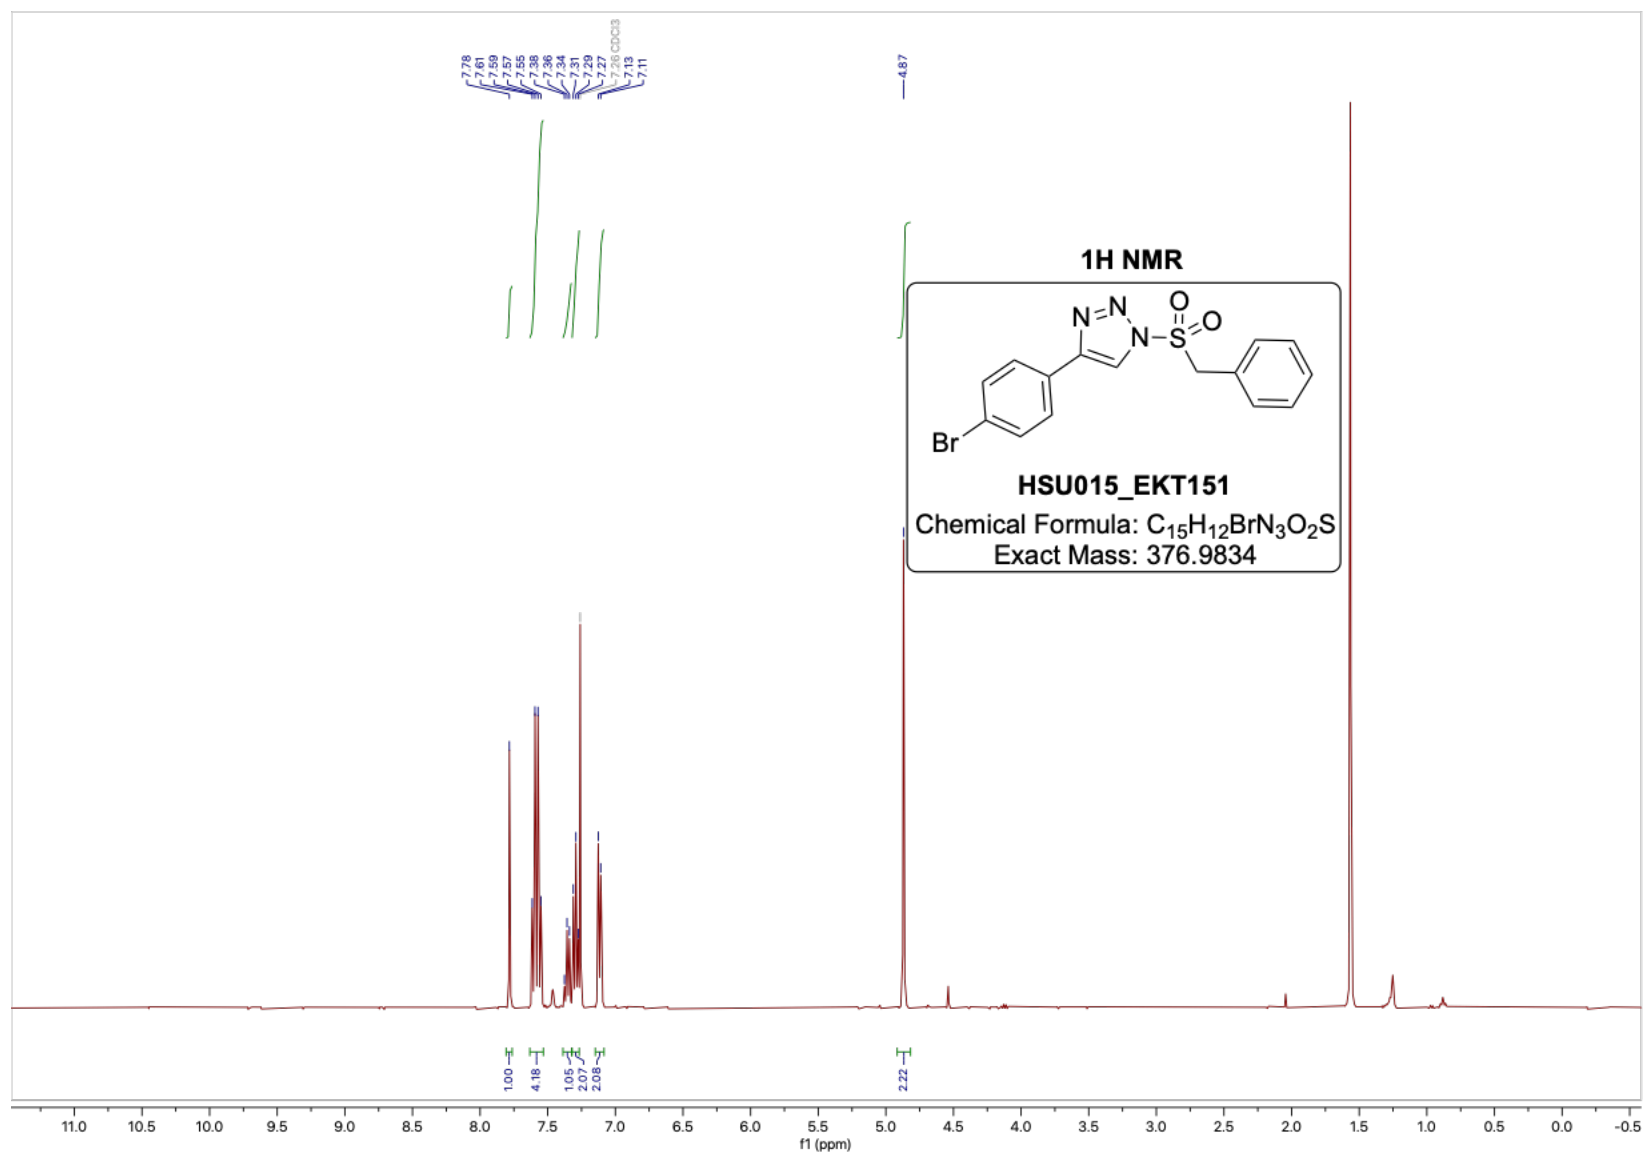

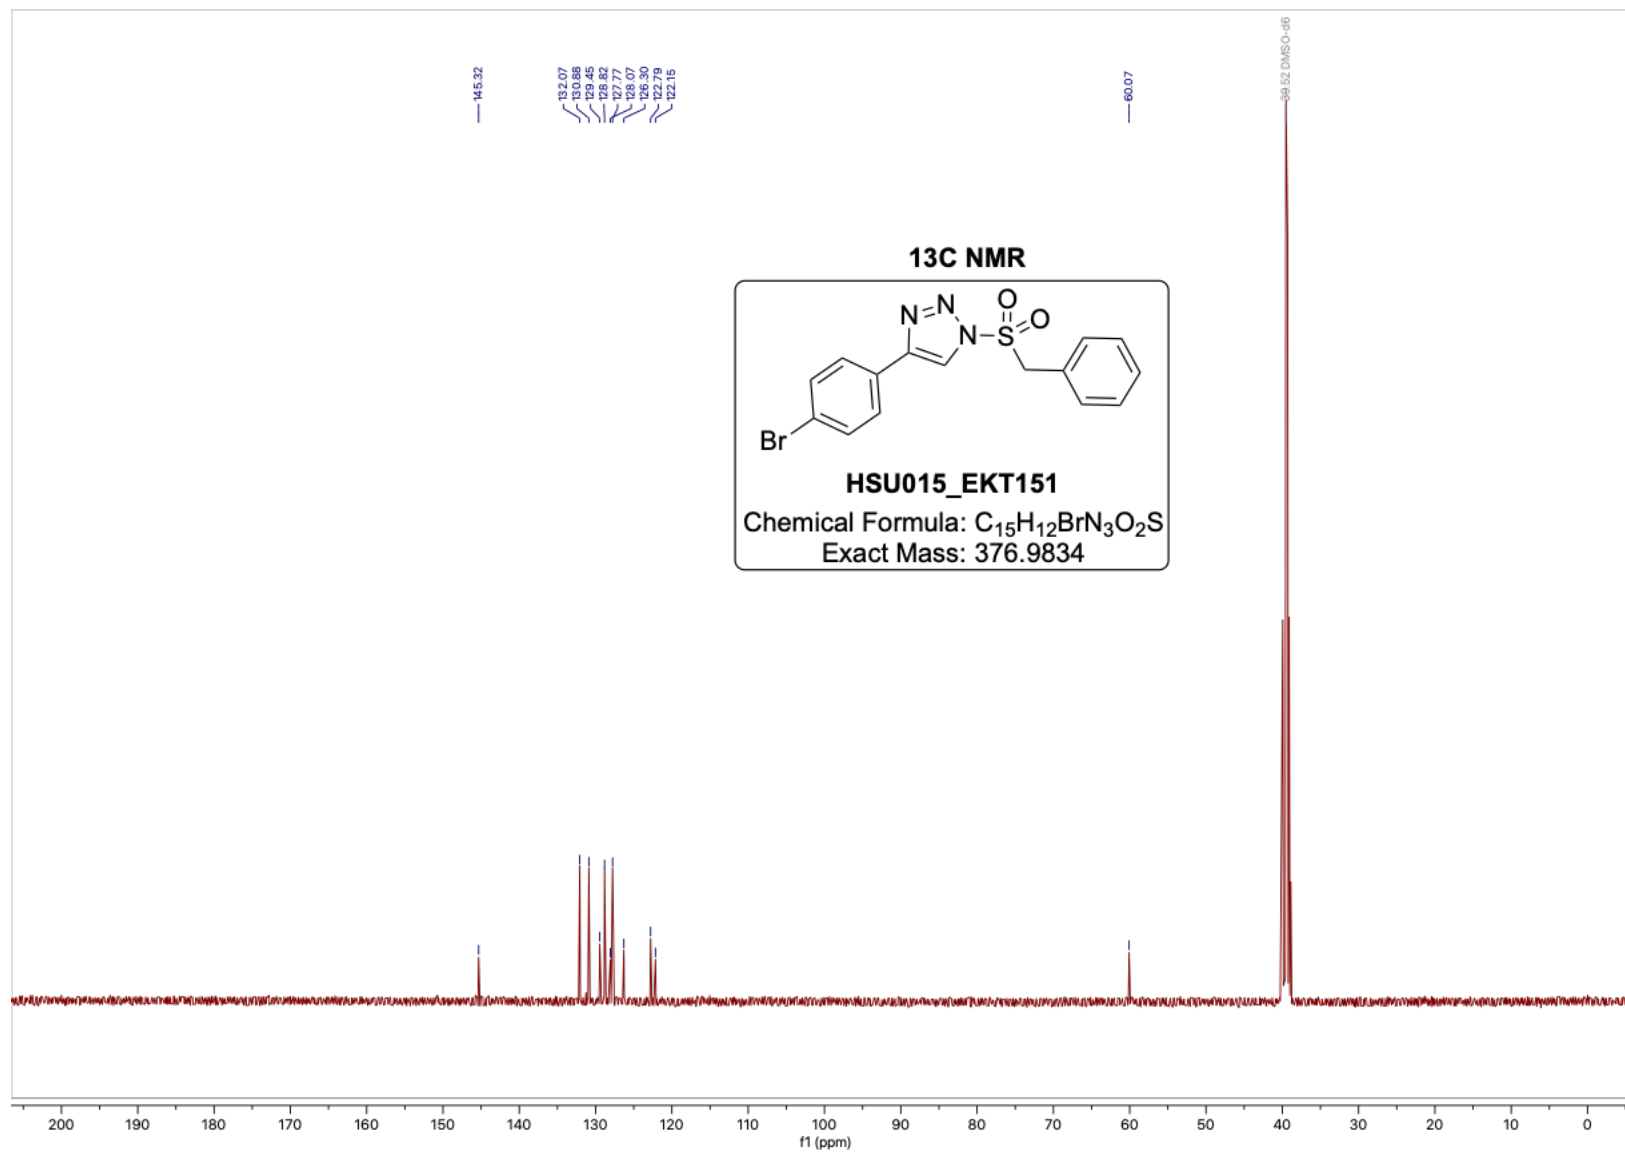

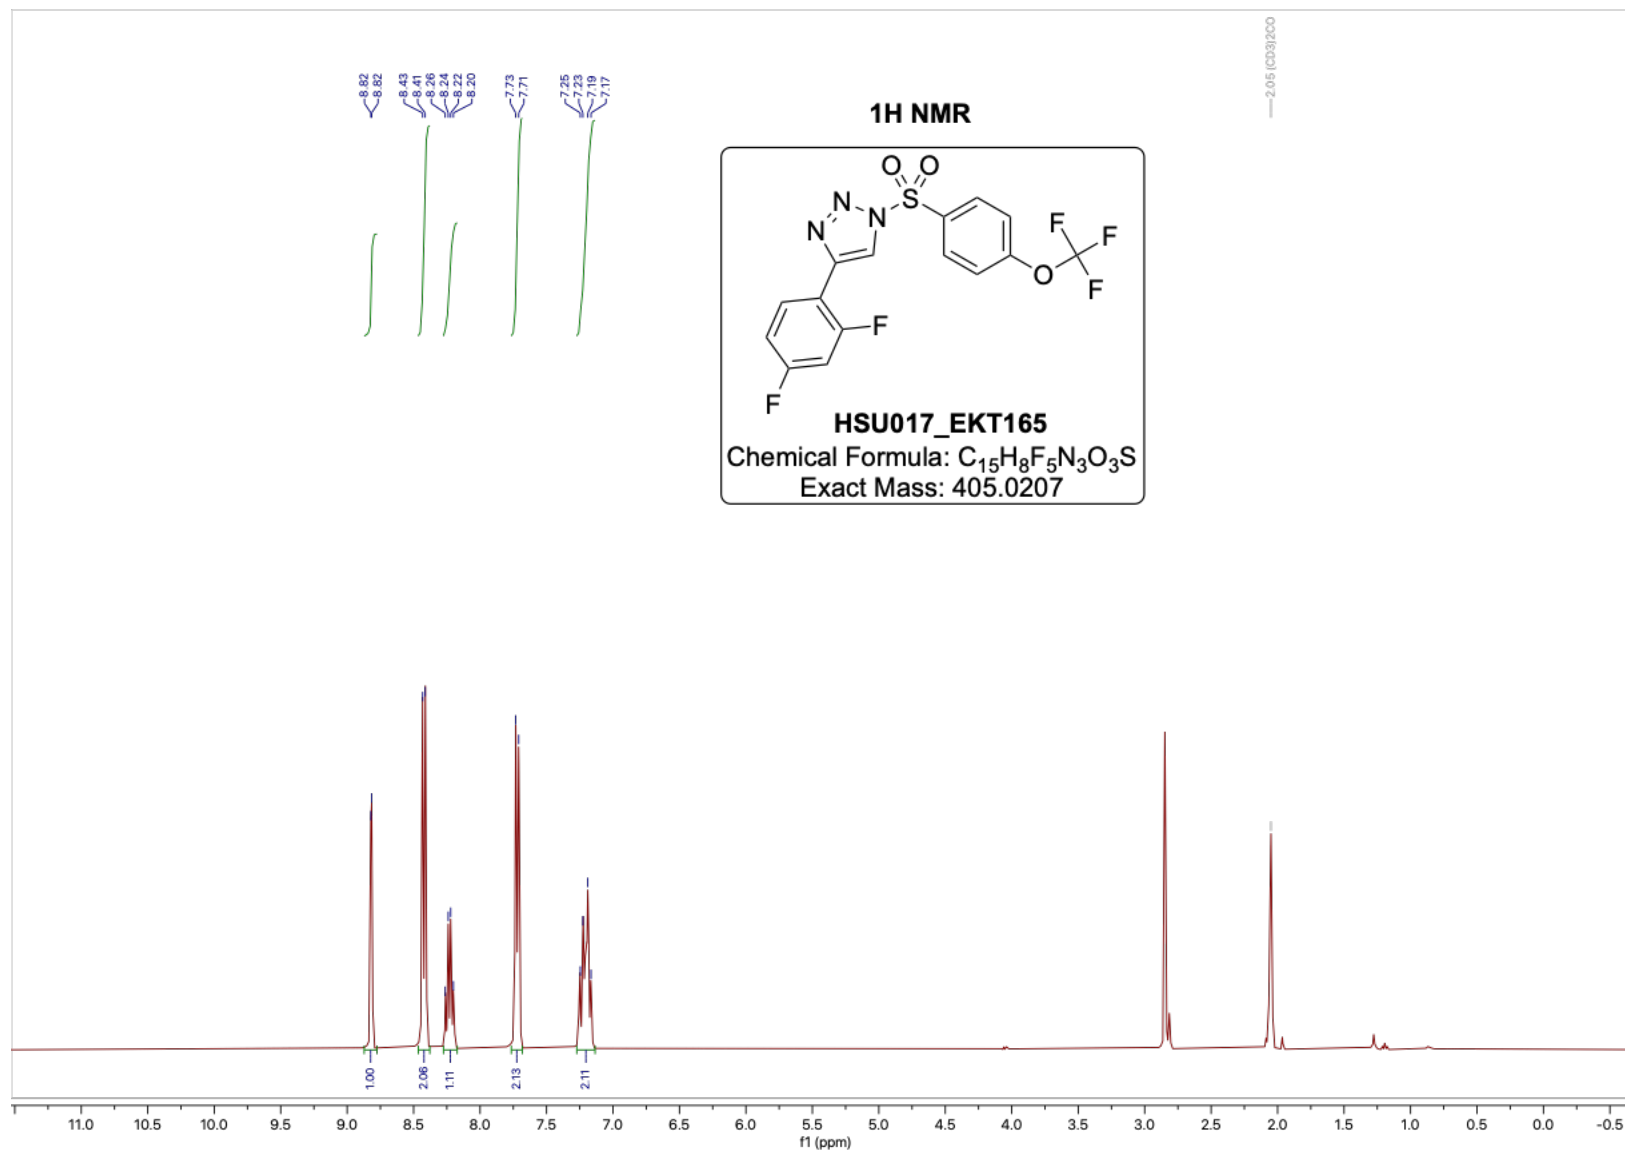



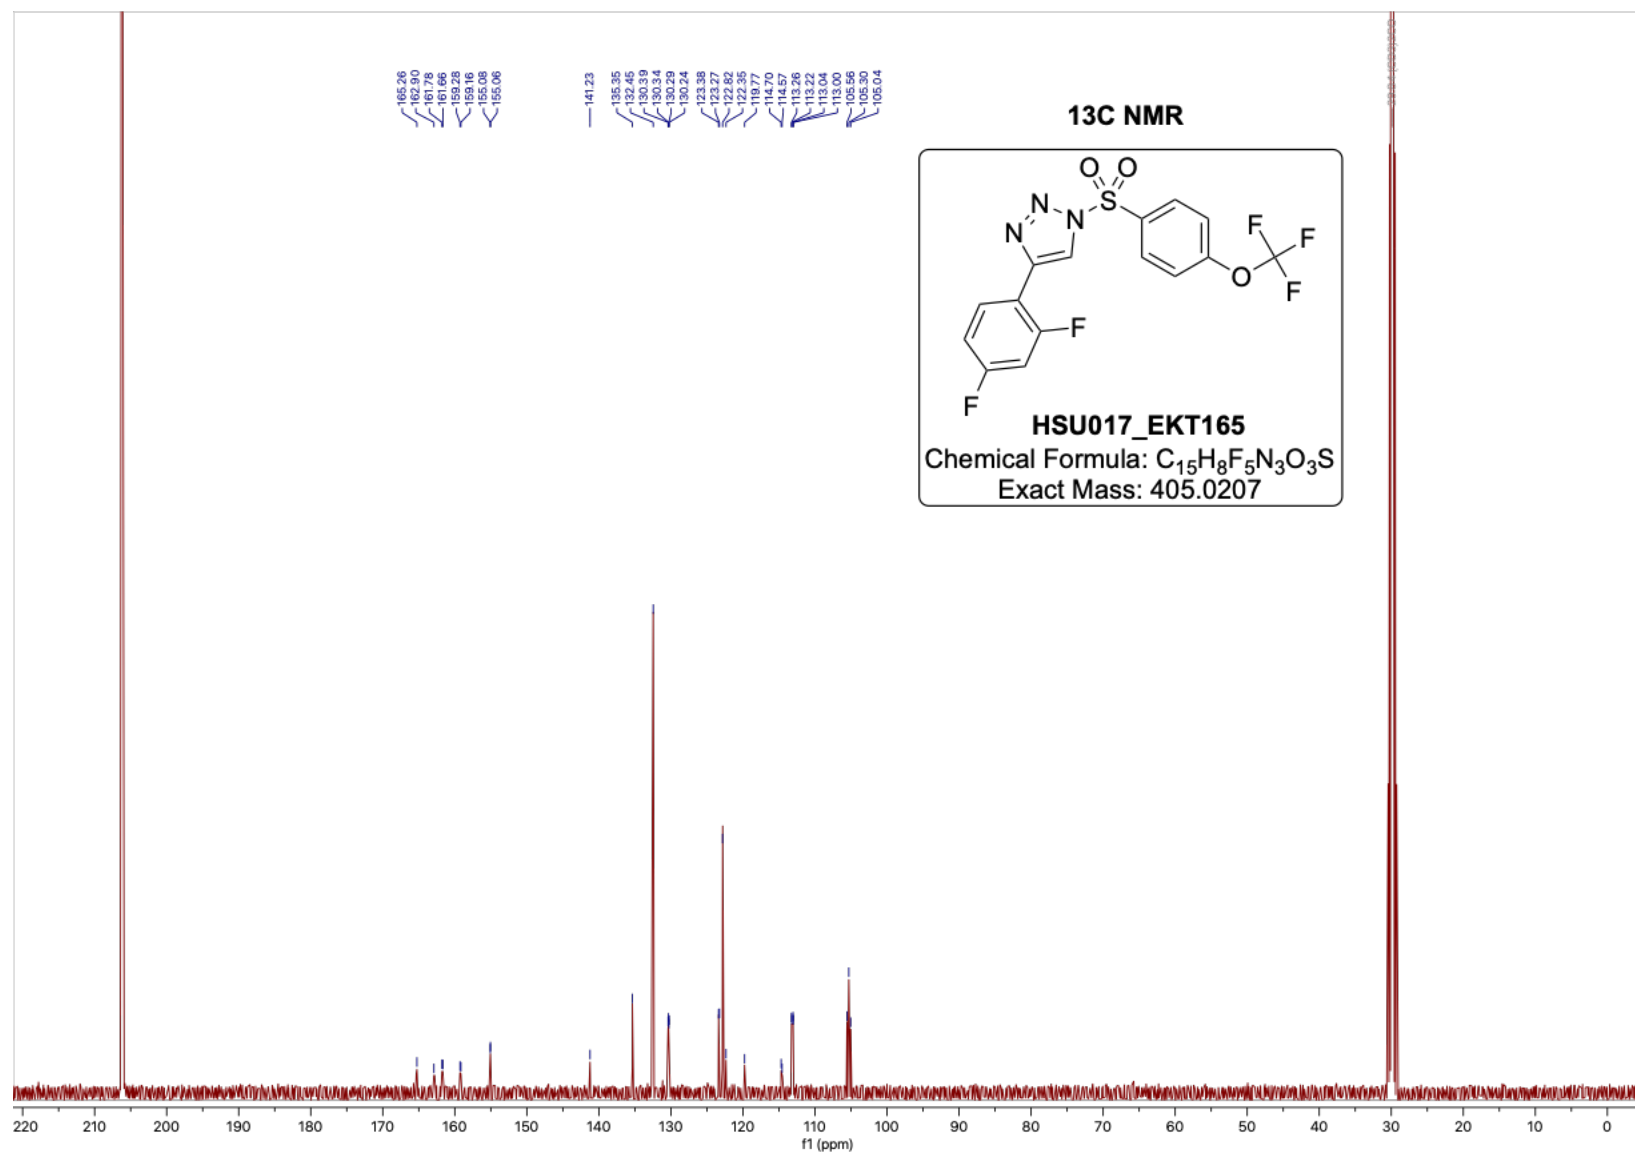

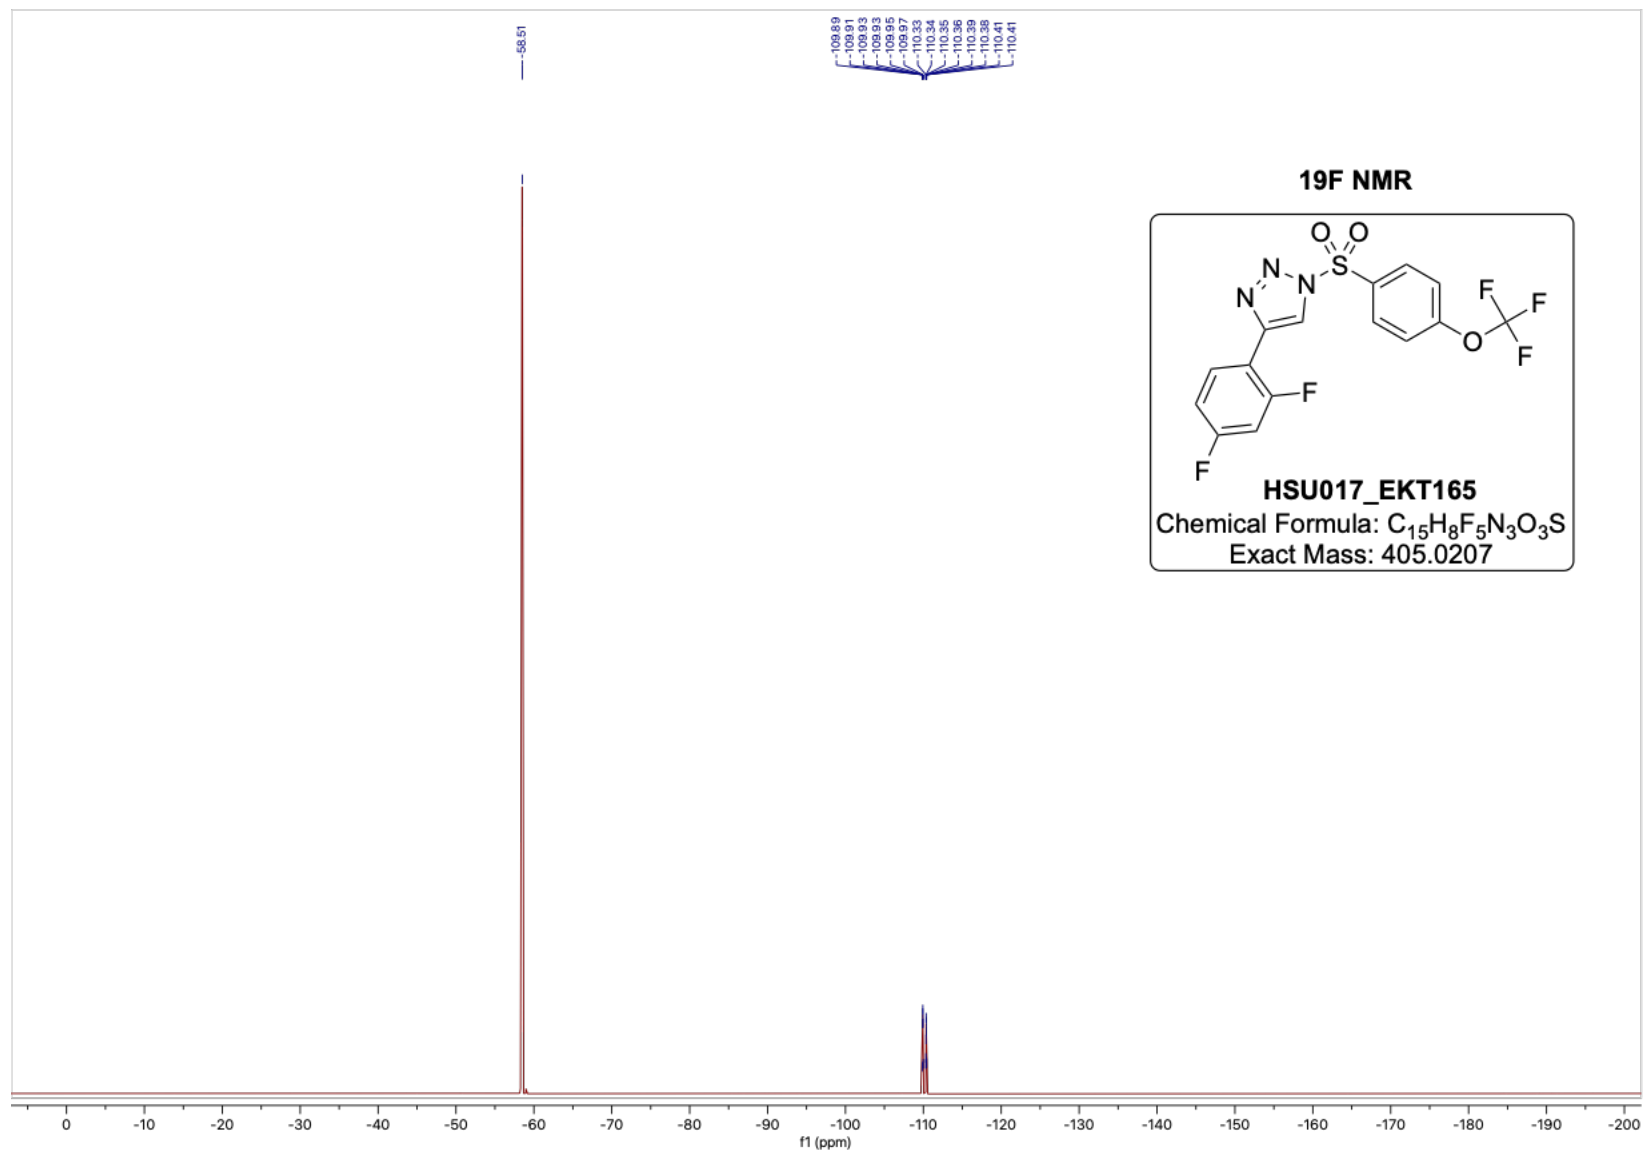

**<sup>1</sup>H NMR**

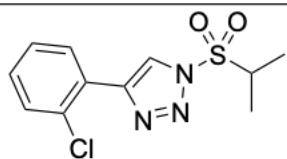

**HSU019\_EKT122**

Chemical Formula: C<sub>11</sub>H<sub>12</sub>ClN<sub>3</sub>O<sub>2</sub>S  
Exact Mass: 285.0339

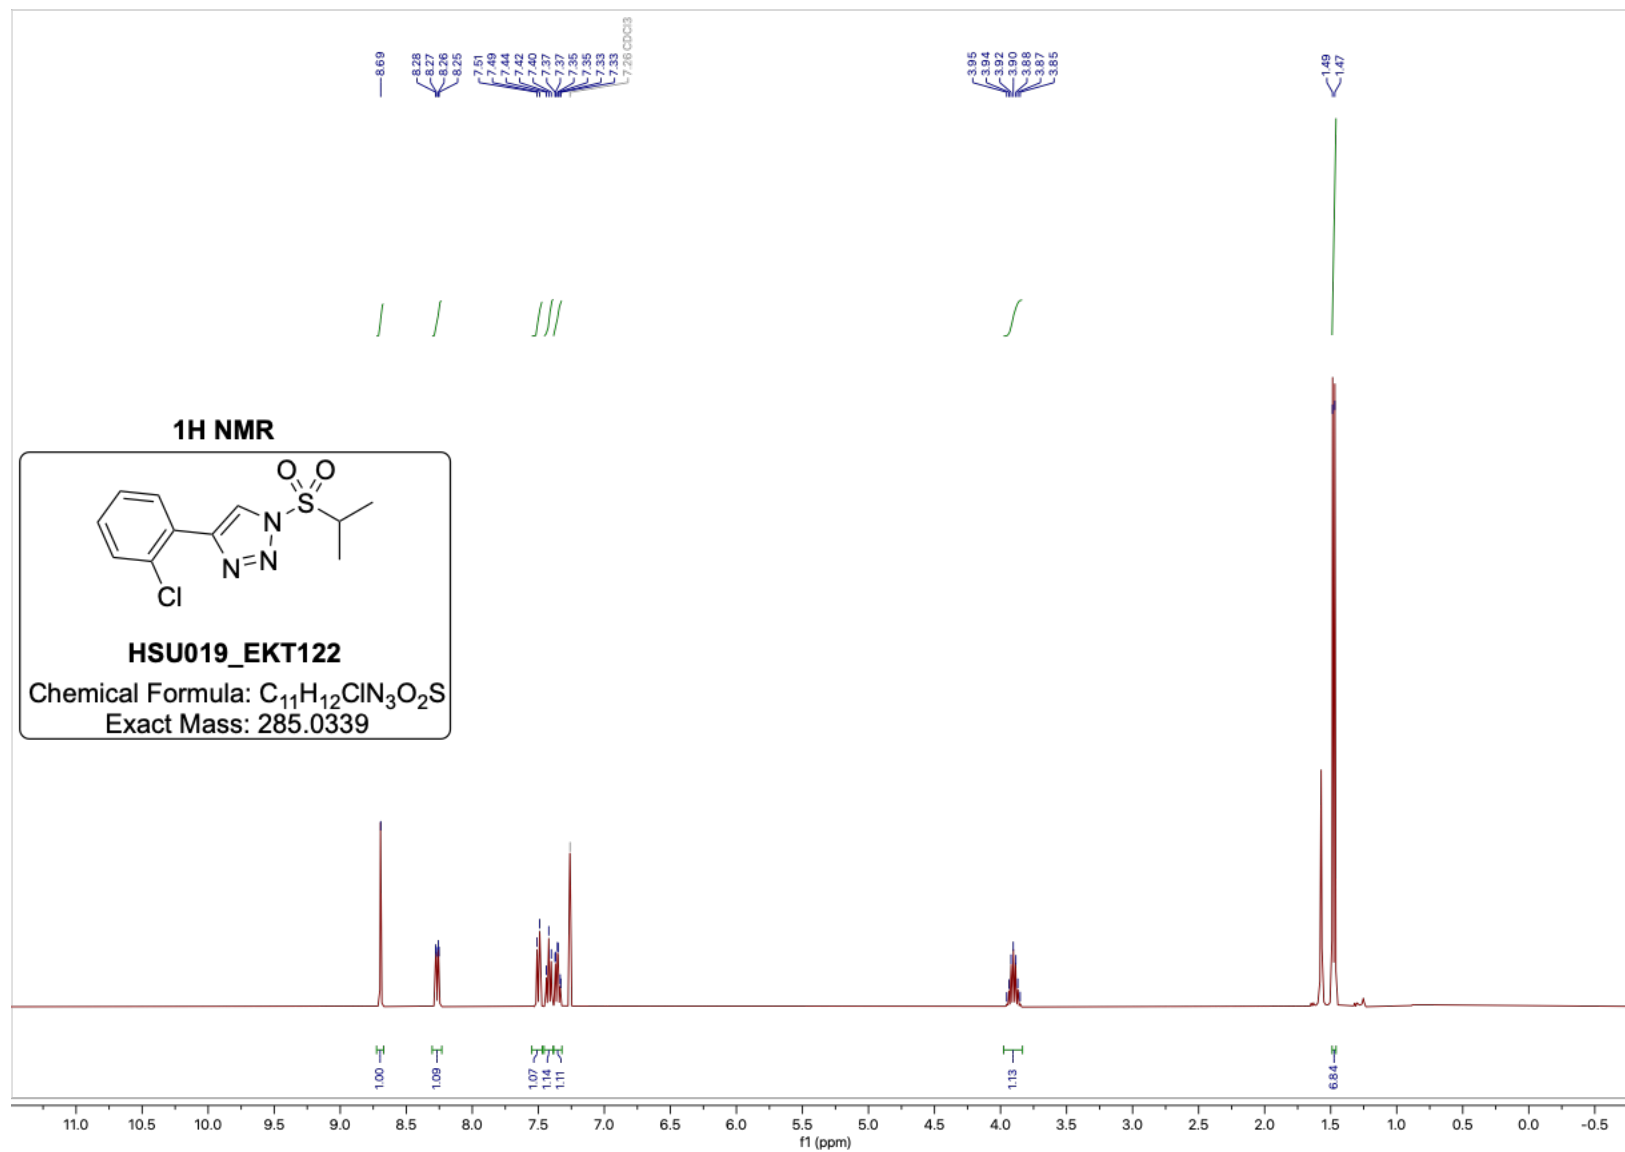

### **<sup>13</sup>C NMR**

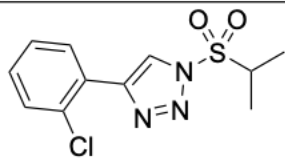

**HSU019\_EKT122**

Chemical Formula: C<sub>11</sub>H<sub>12</sub>ClN<sub>3</sub>O<sub>2</sub>S  
Exact Mass: 285.0339

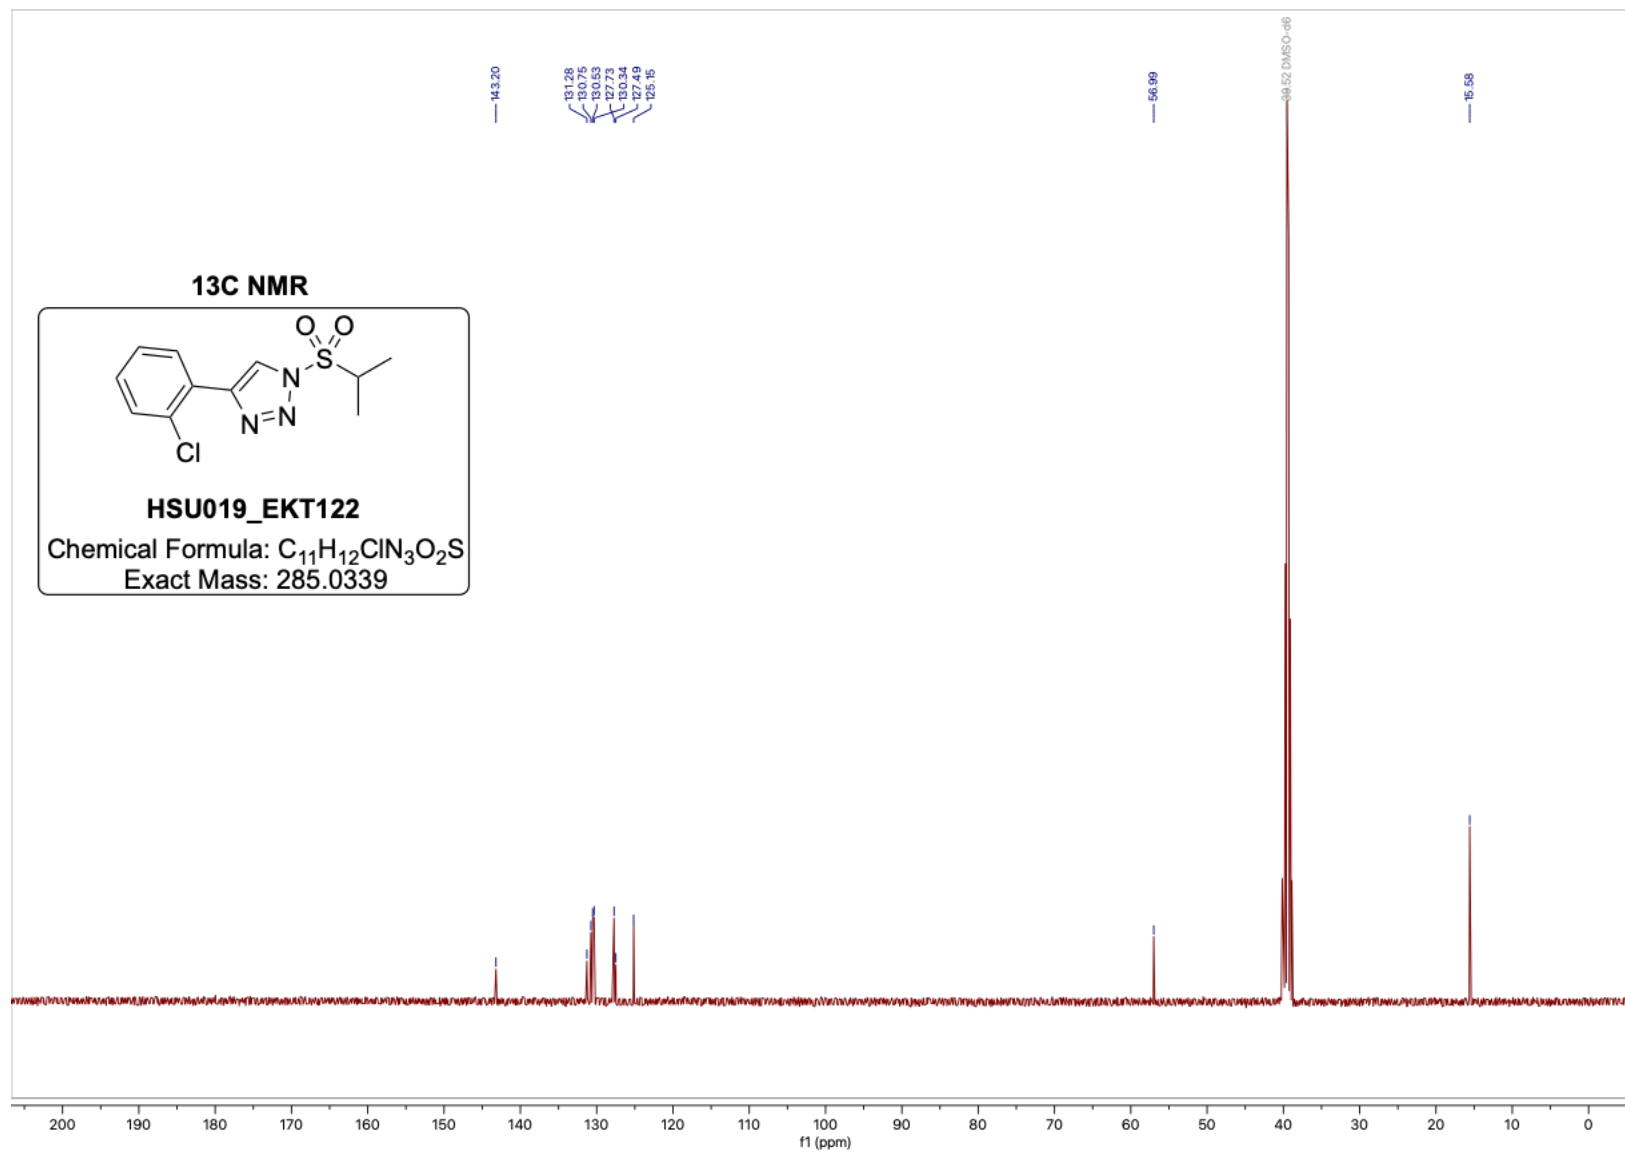

**<sup>1</sup>H NMR**

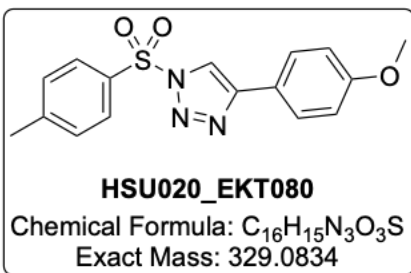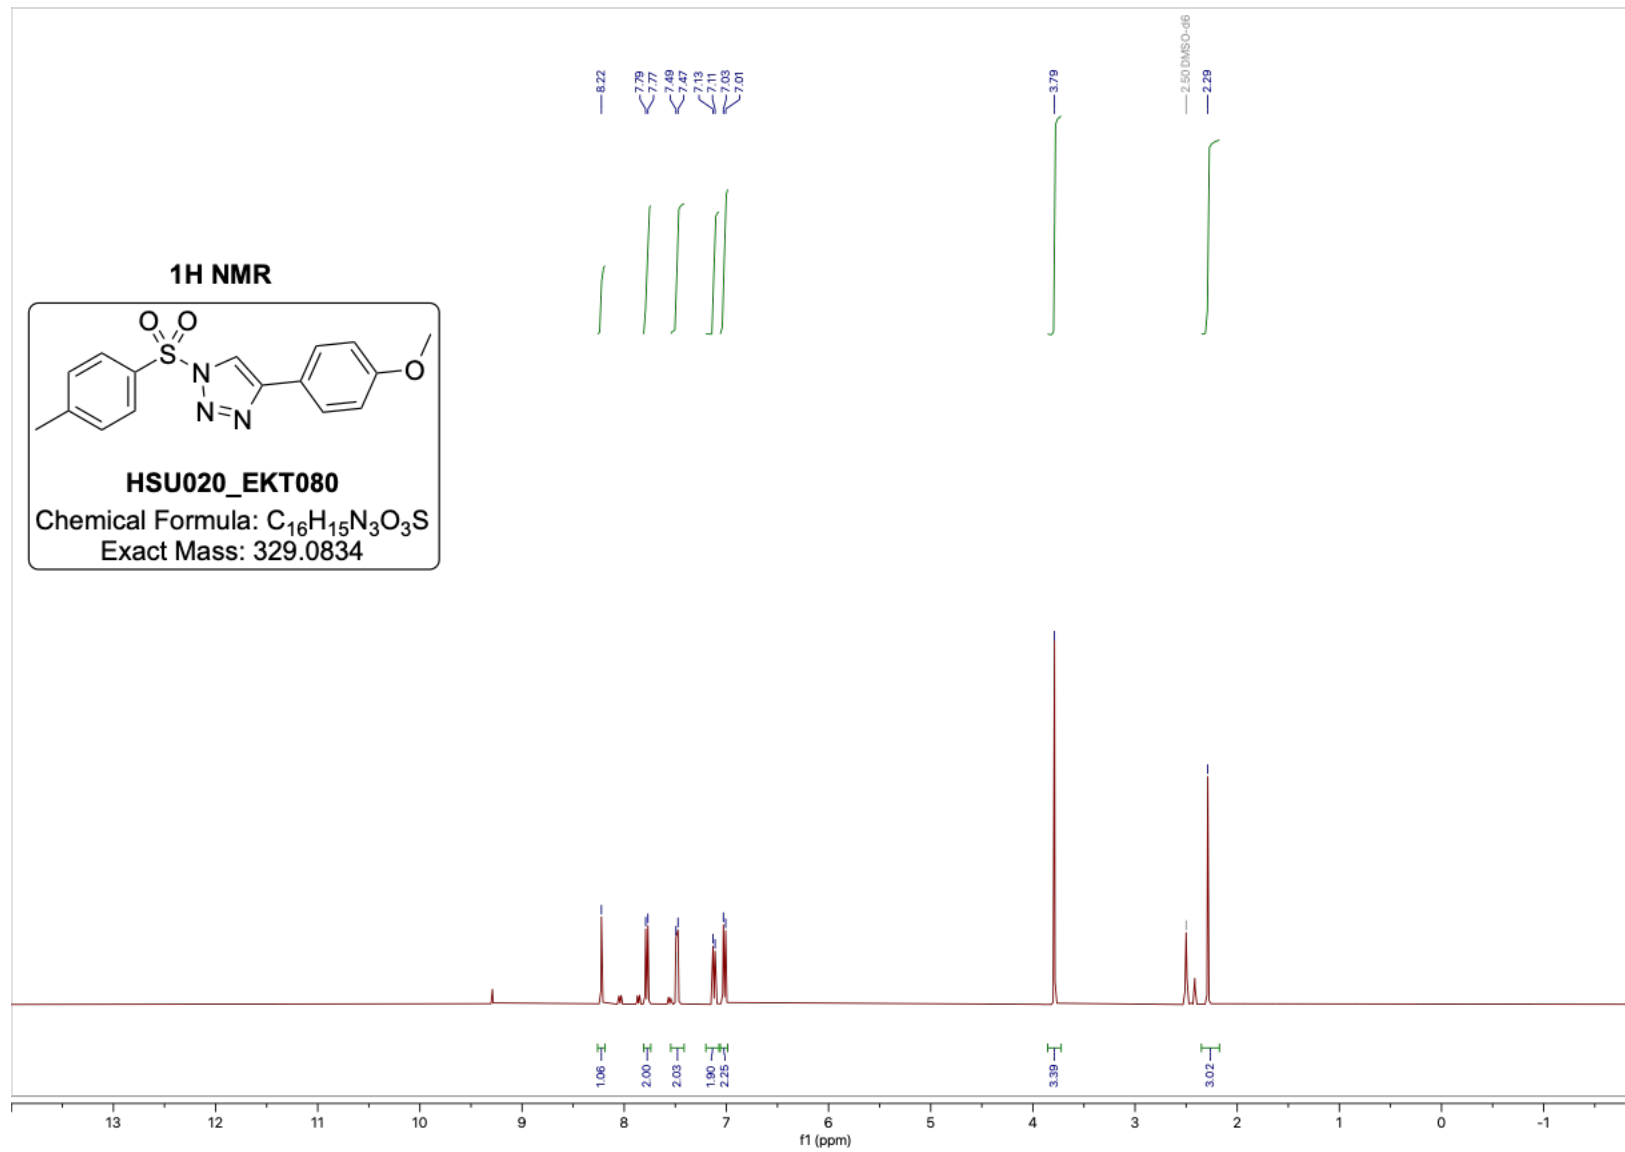

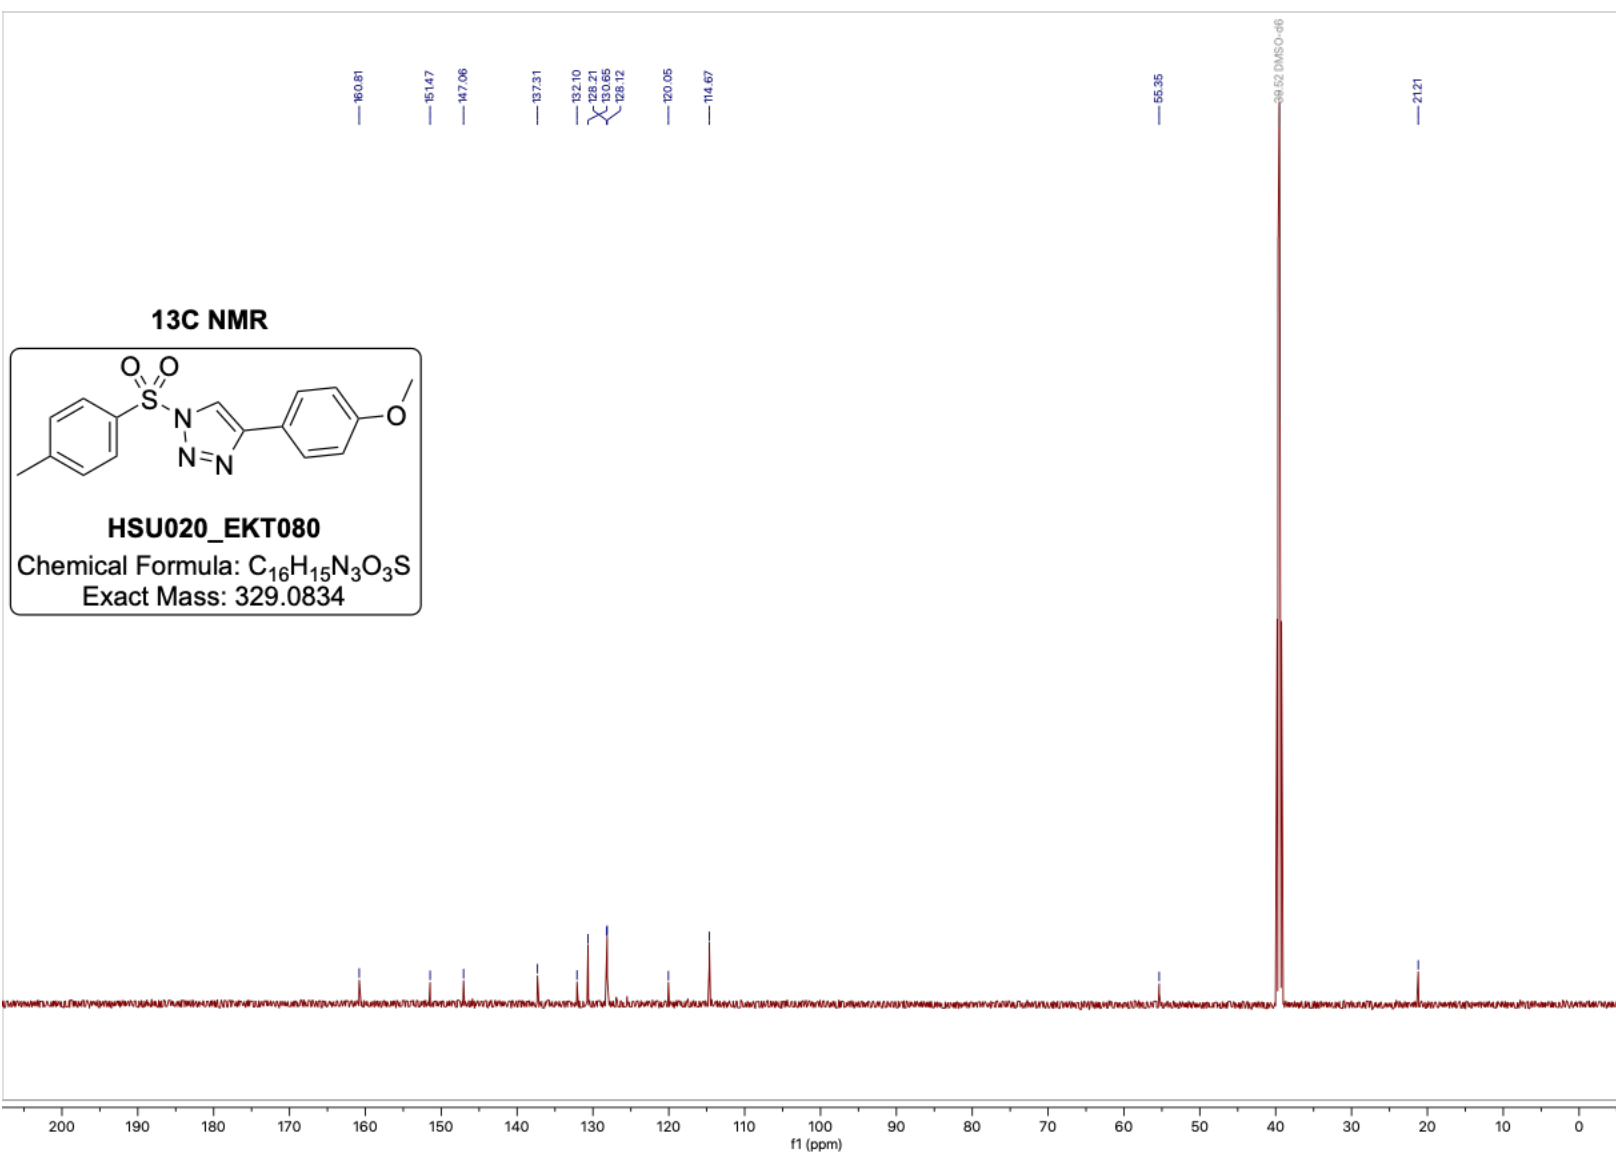

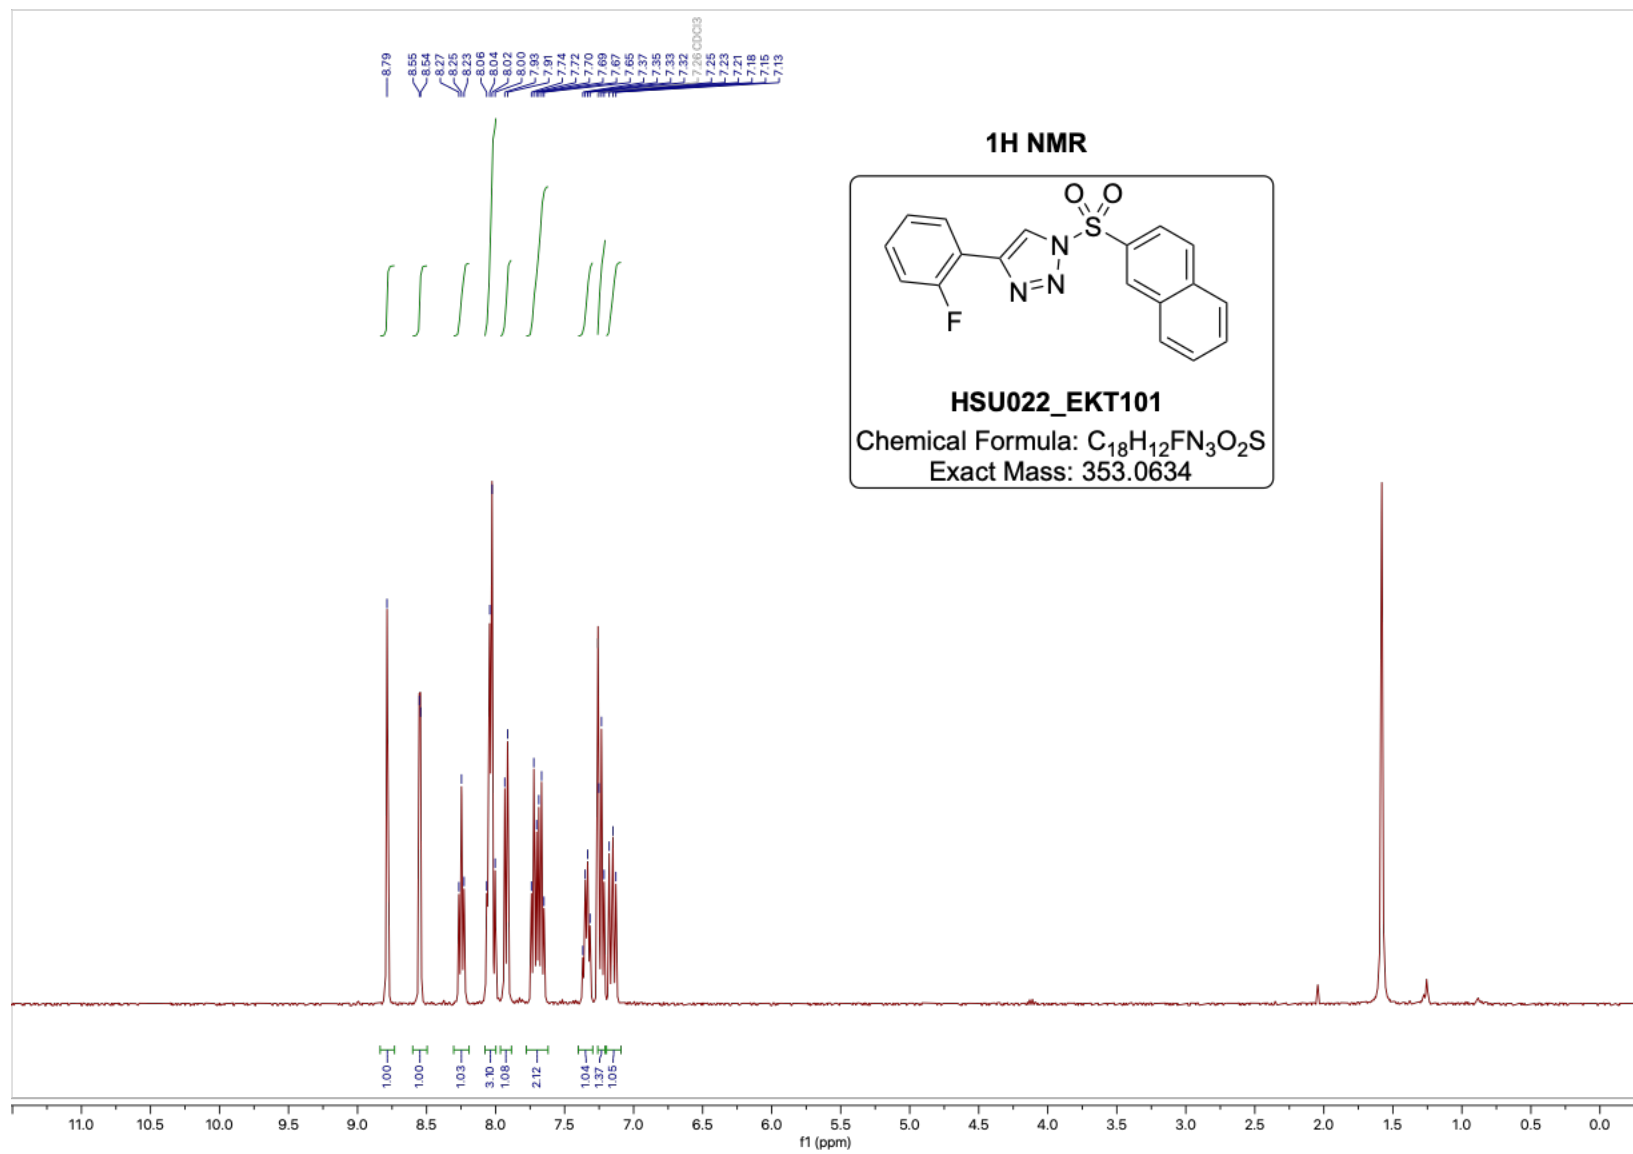

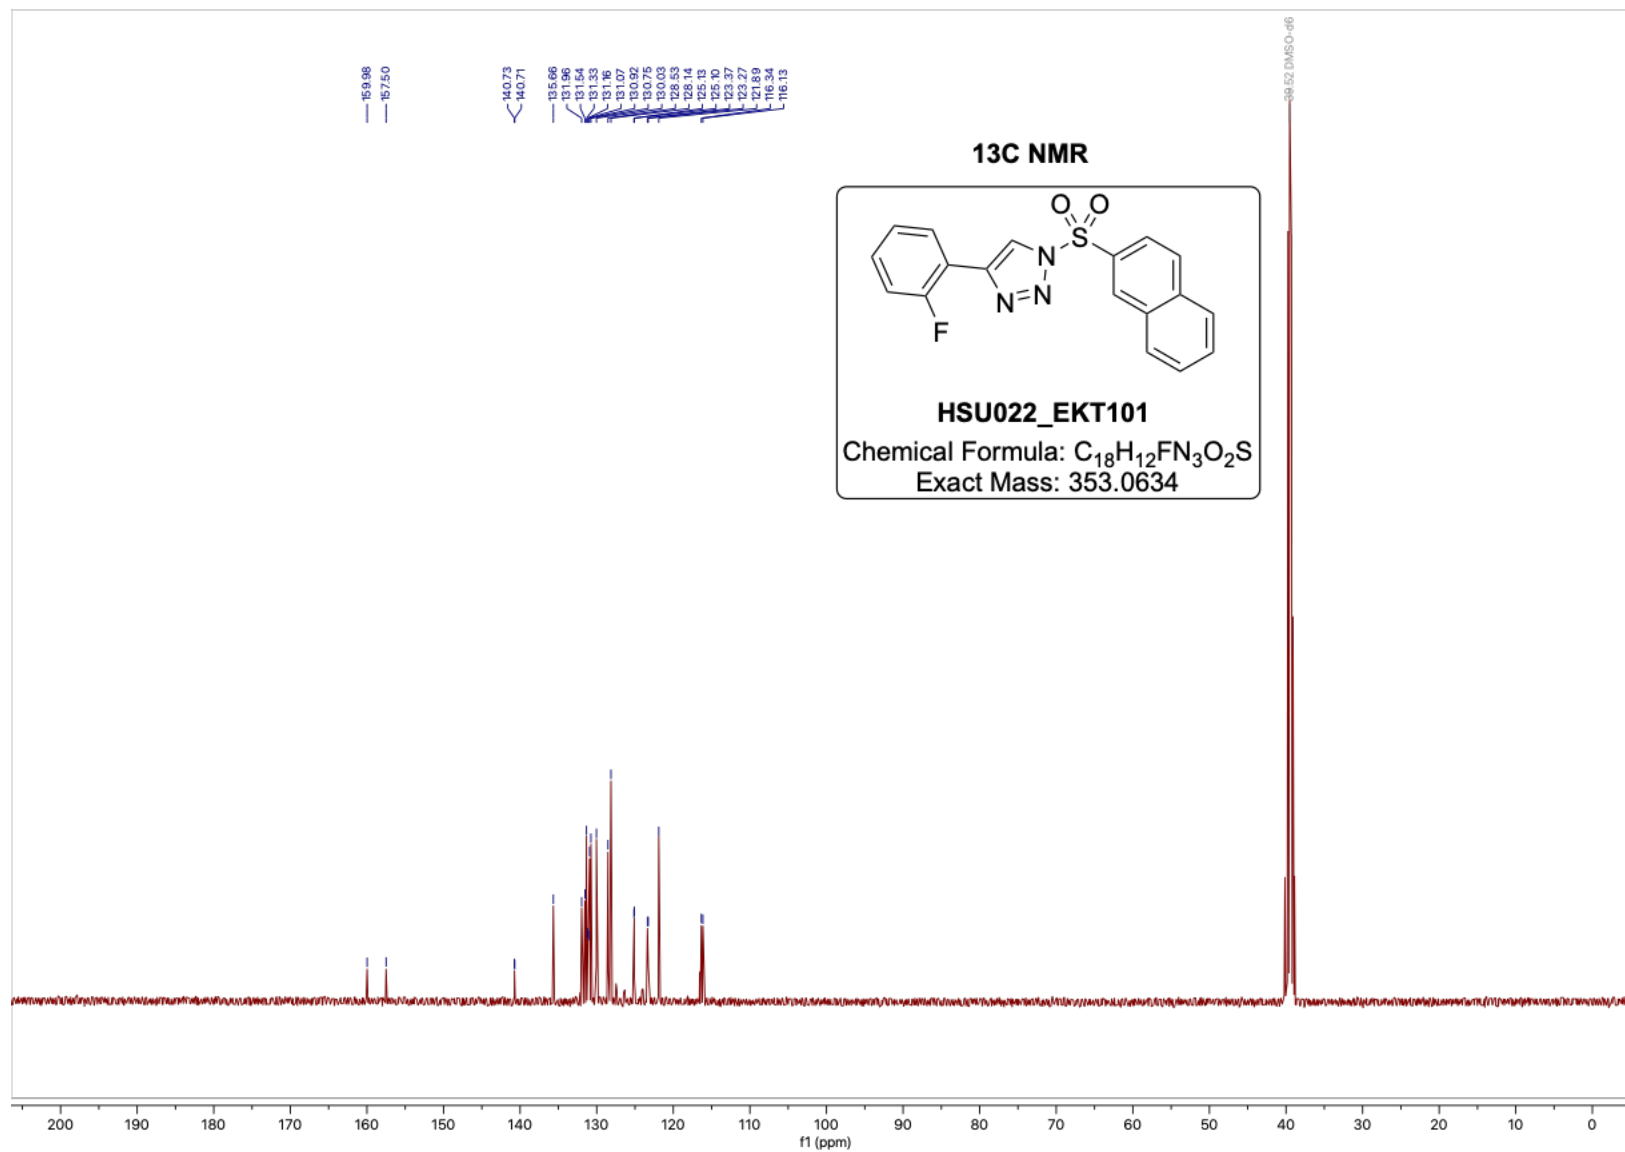



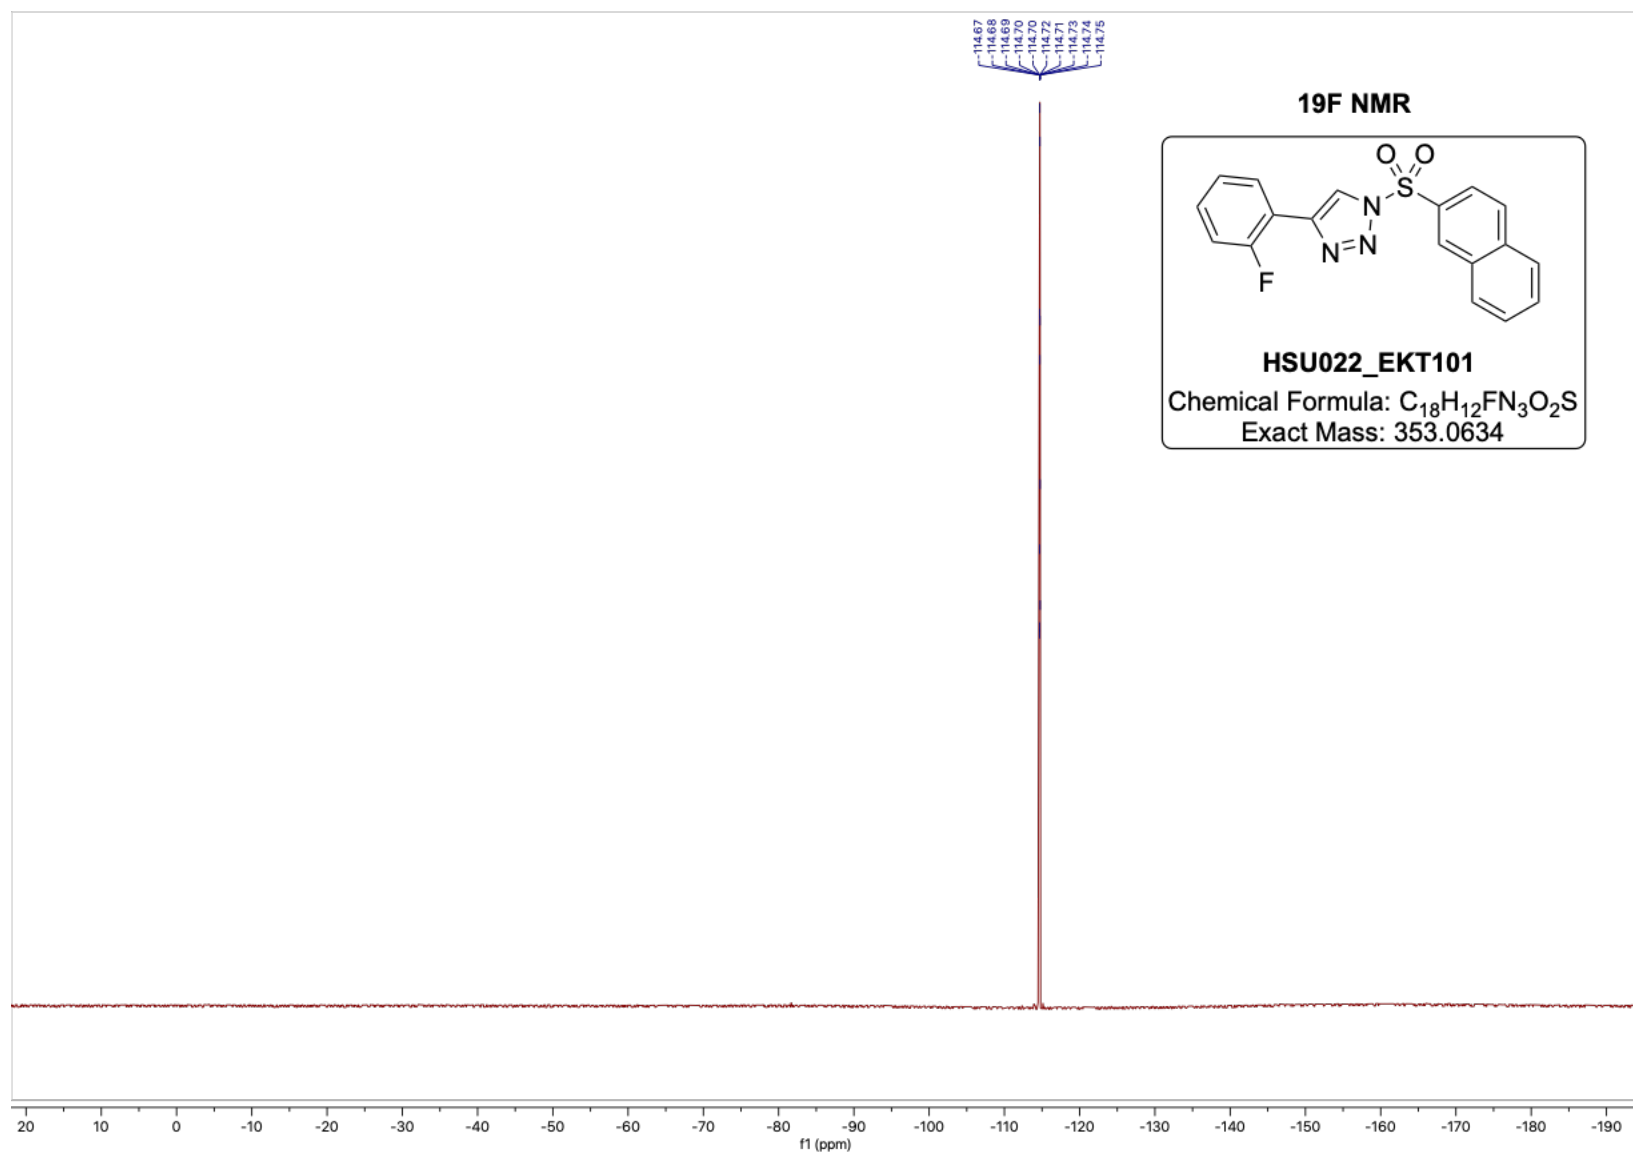

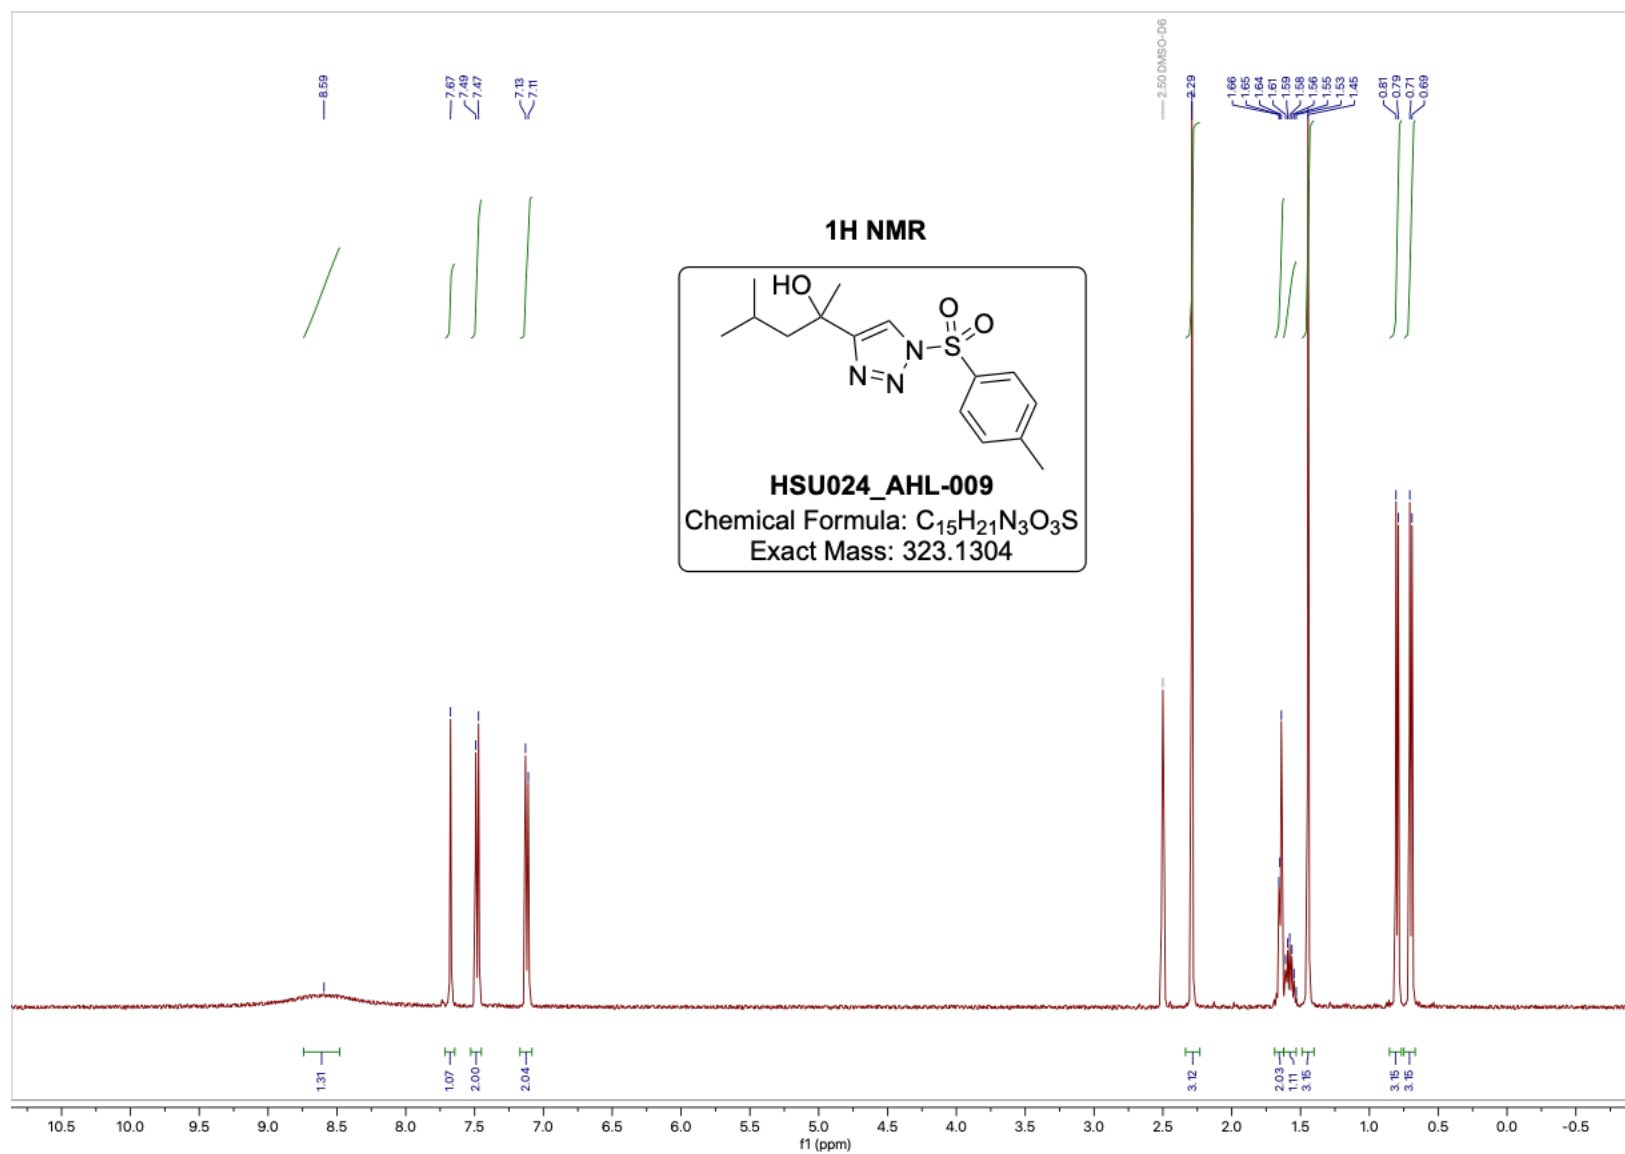

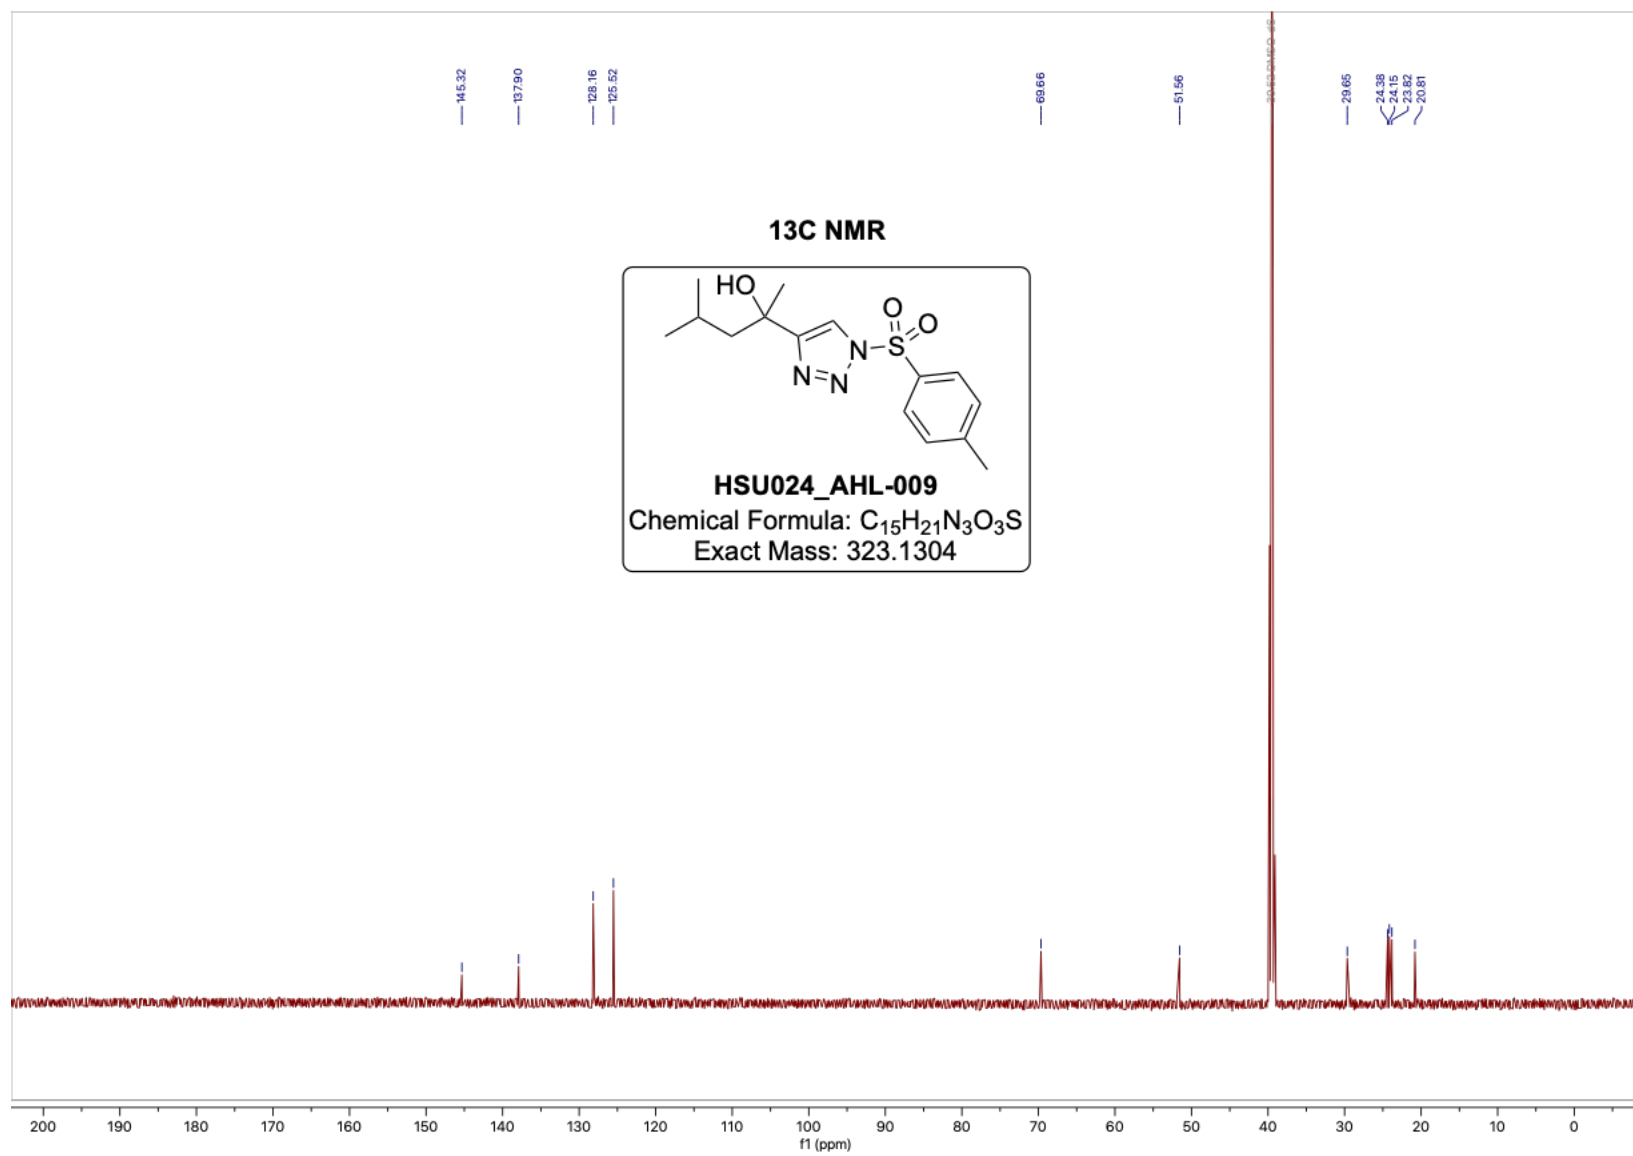

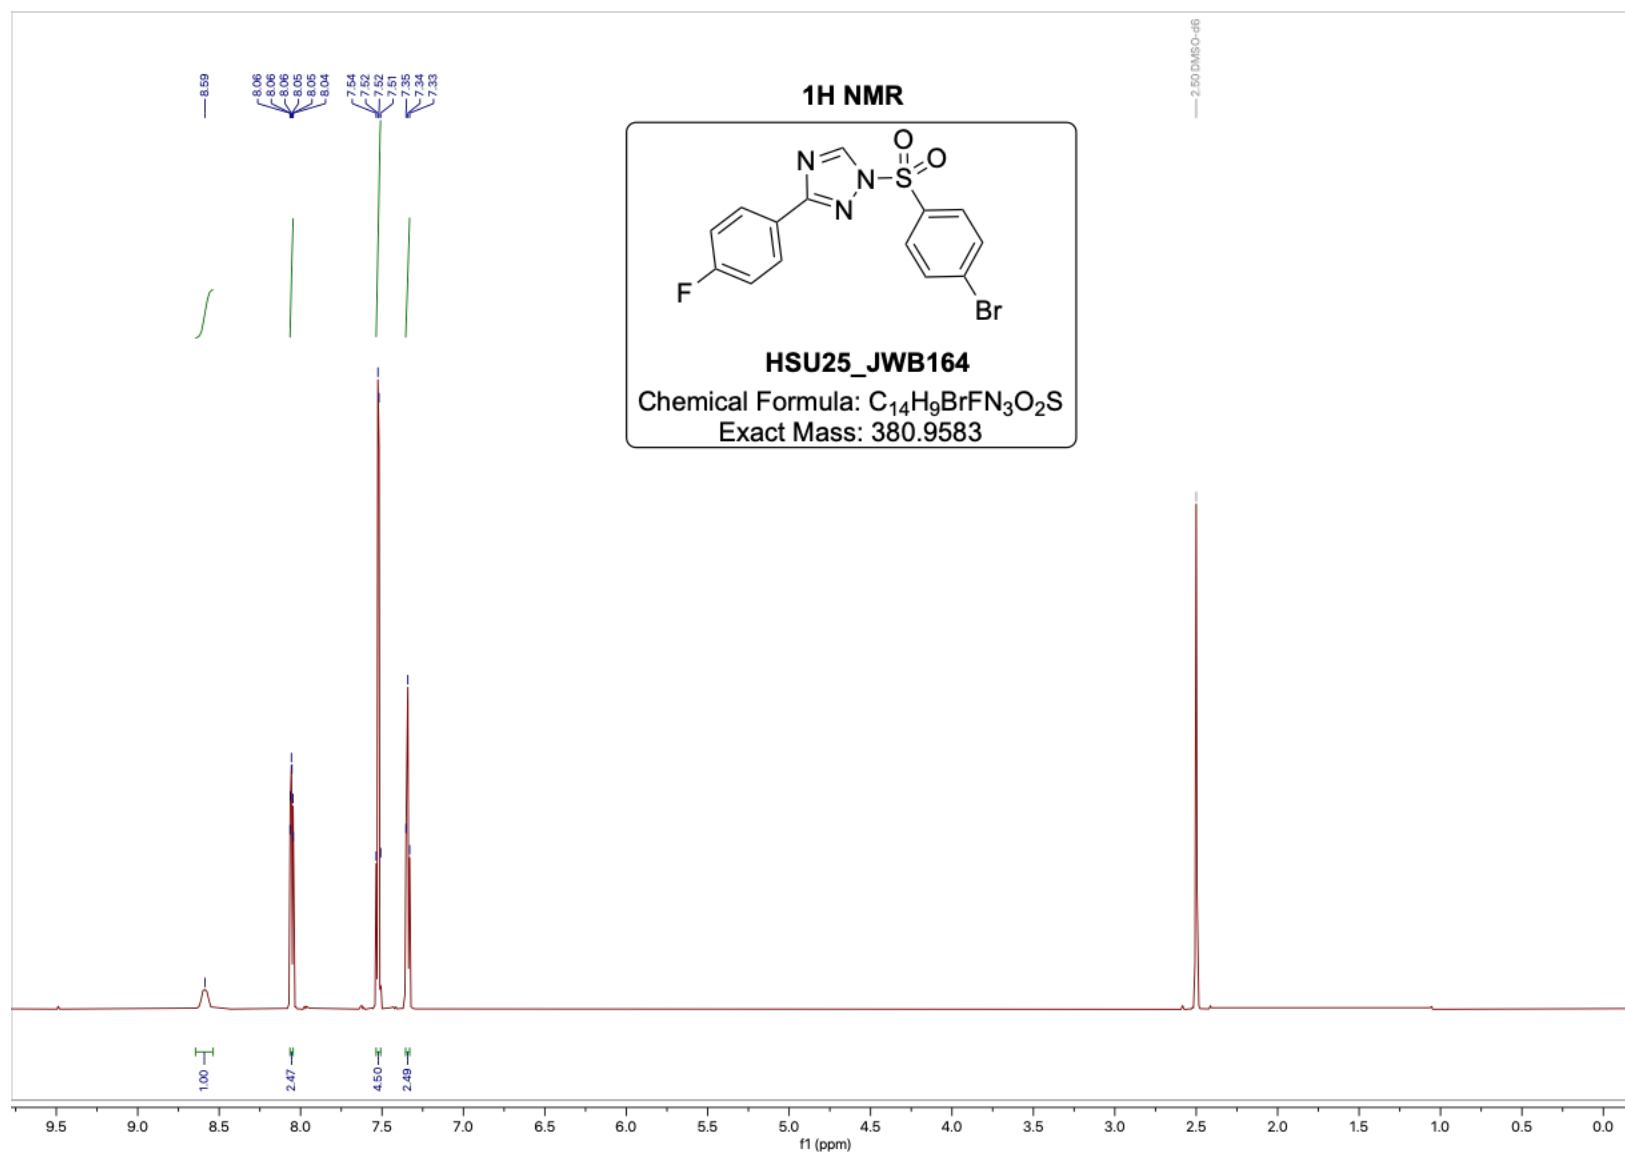

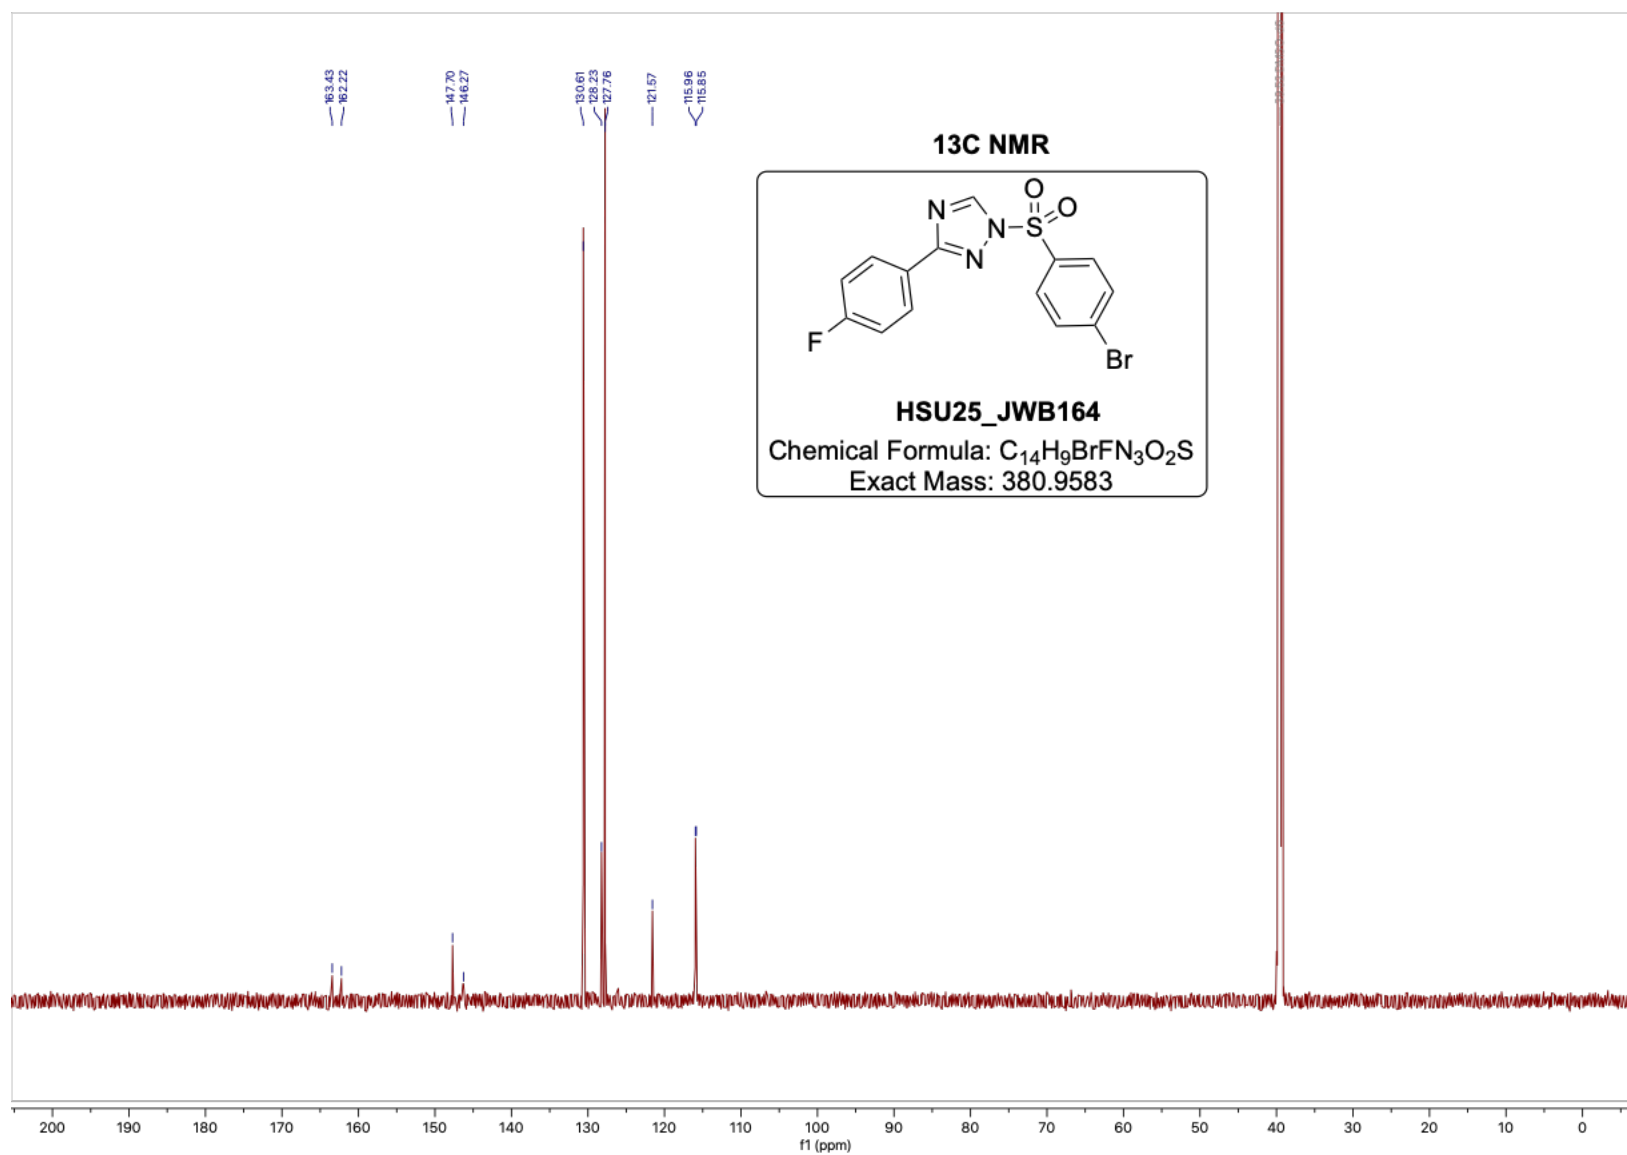

**<sup>19</sup>F NMR**

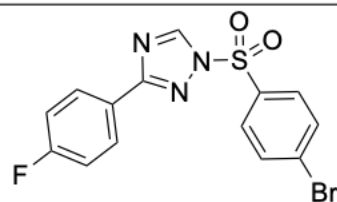

**HSU25\_JWB164**

Chemical Formula: C<sub>14</sub>H<sub>9</sub>BrFN<sub>3</sub>O<sub>2</sub>S

Exact Mass: 380.9583

-113.84  
-113.85  
-113.86  
-113.87  
-113.88  
-113.89  
-113.90  
-113.92

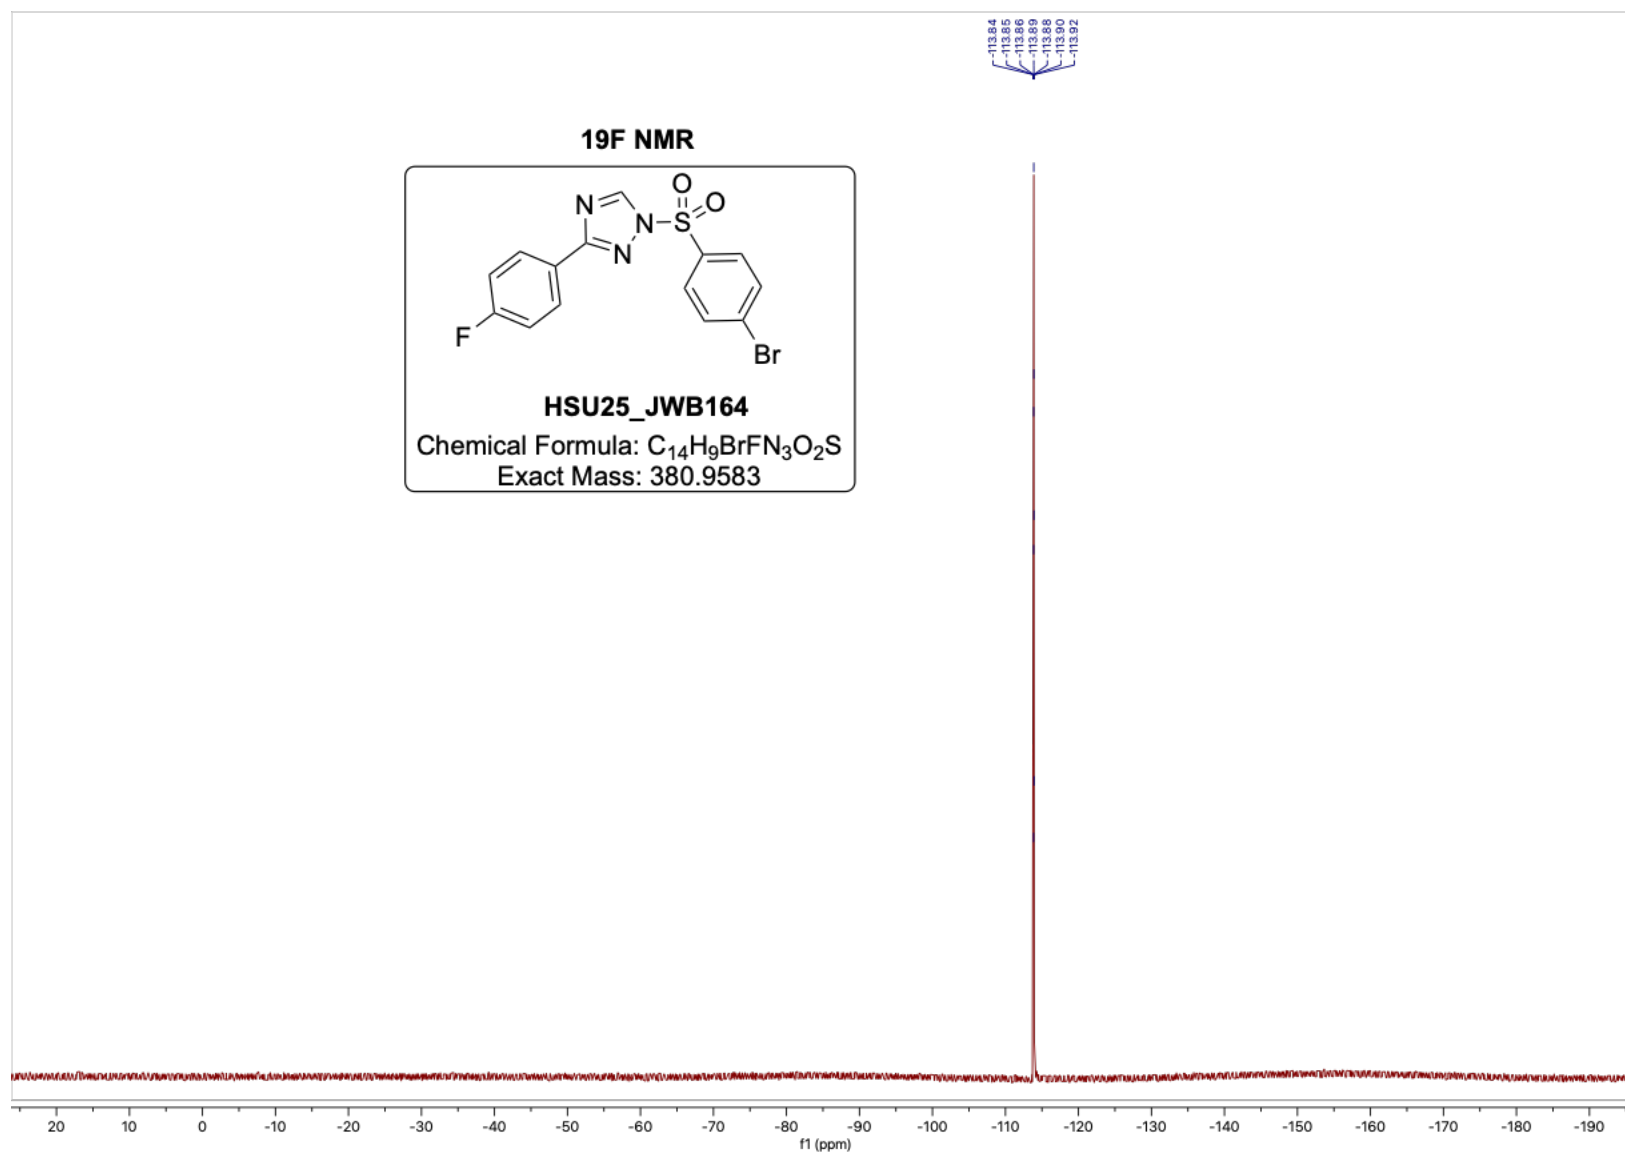

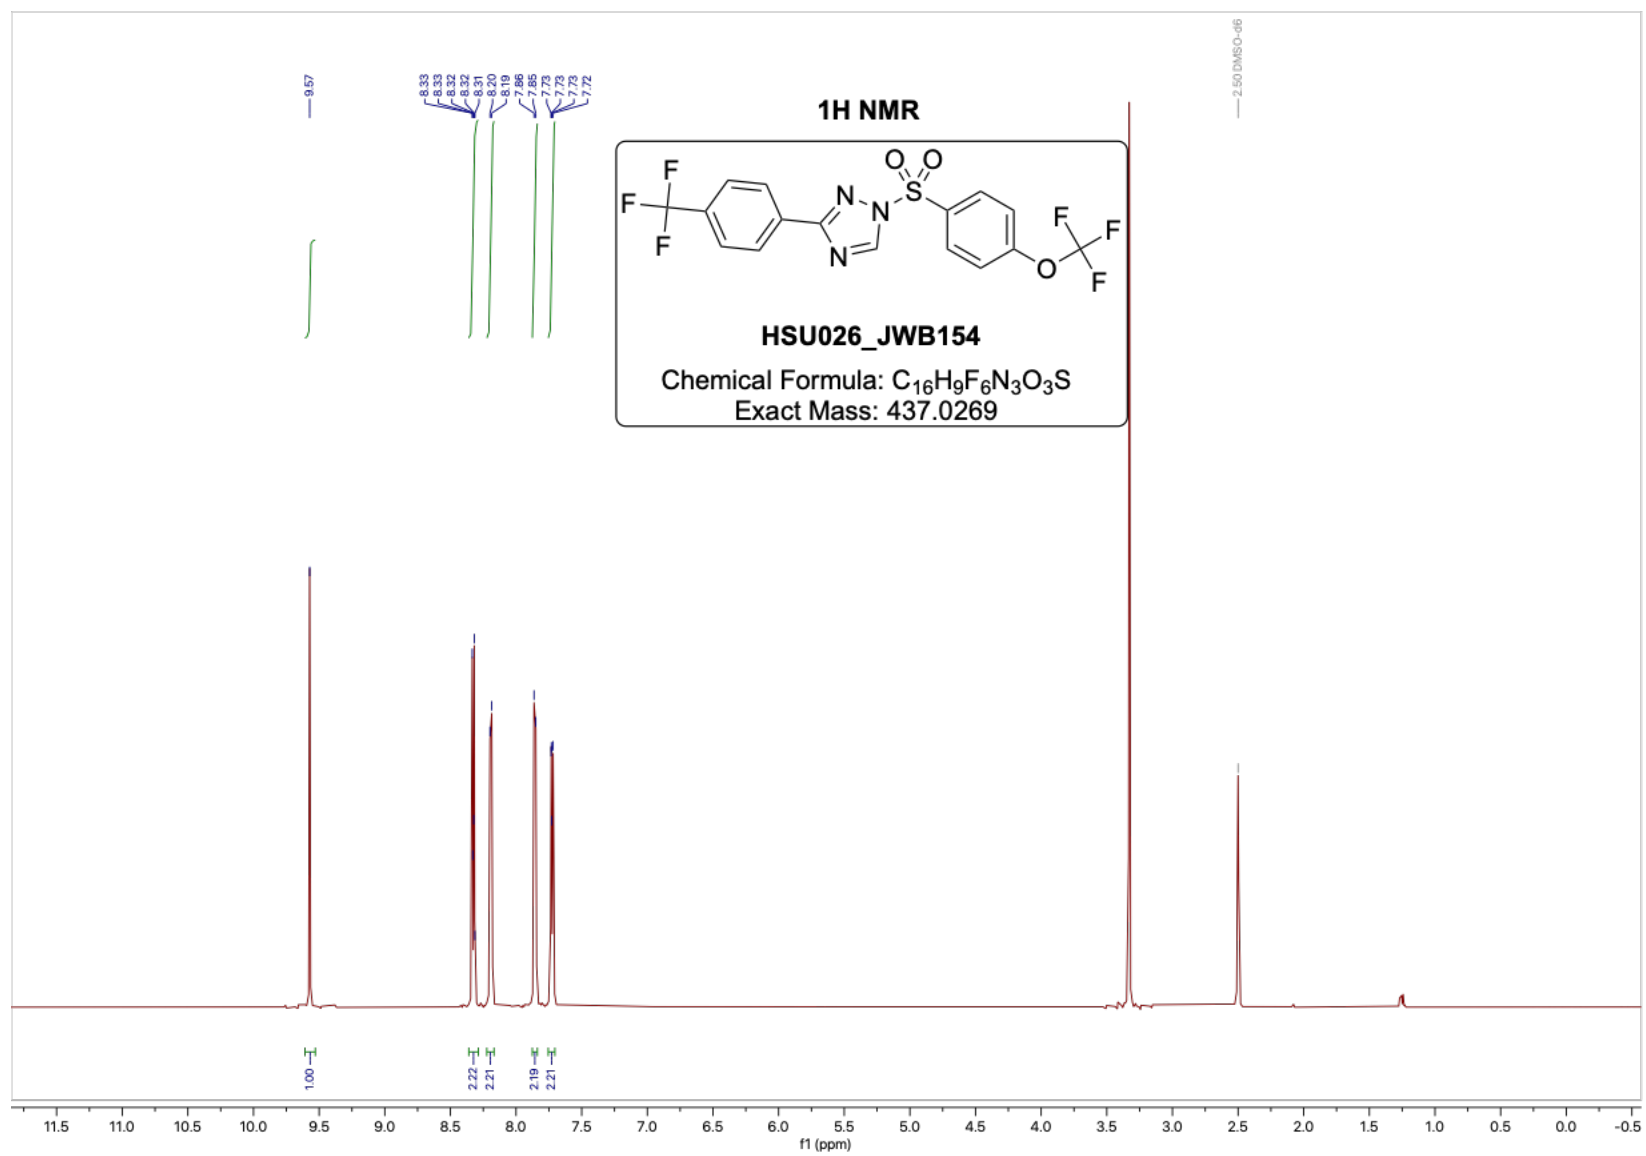

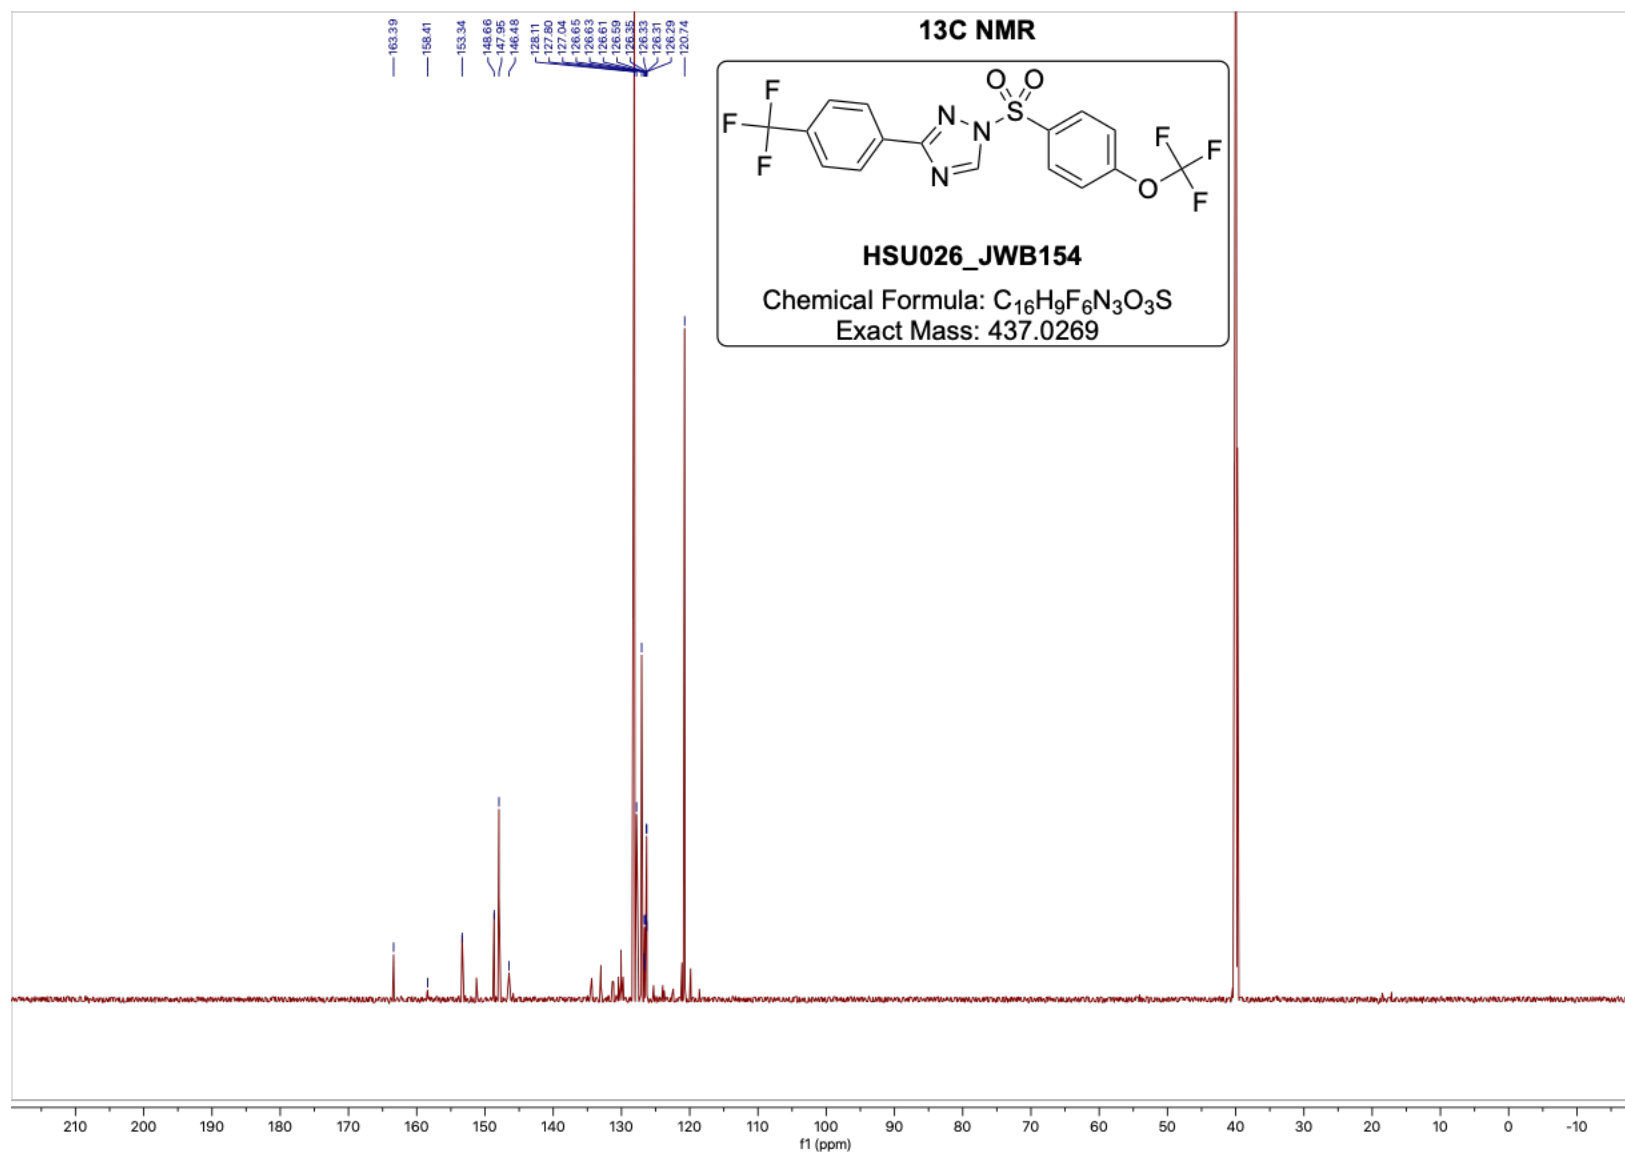



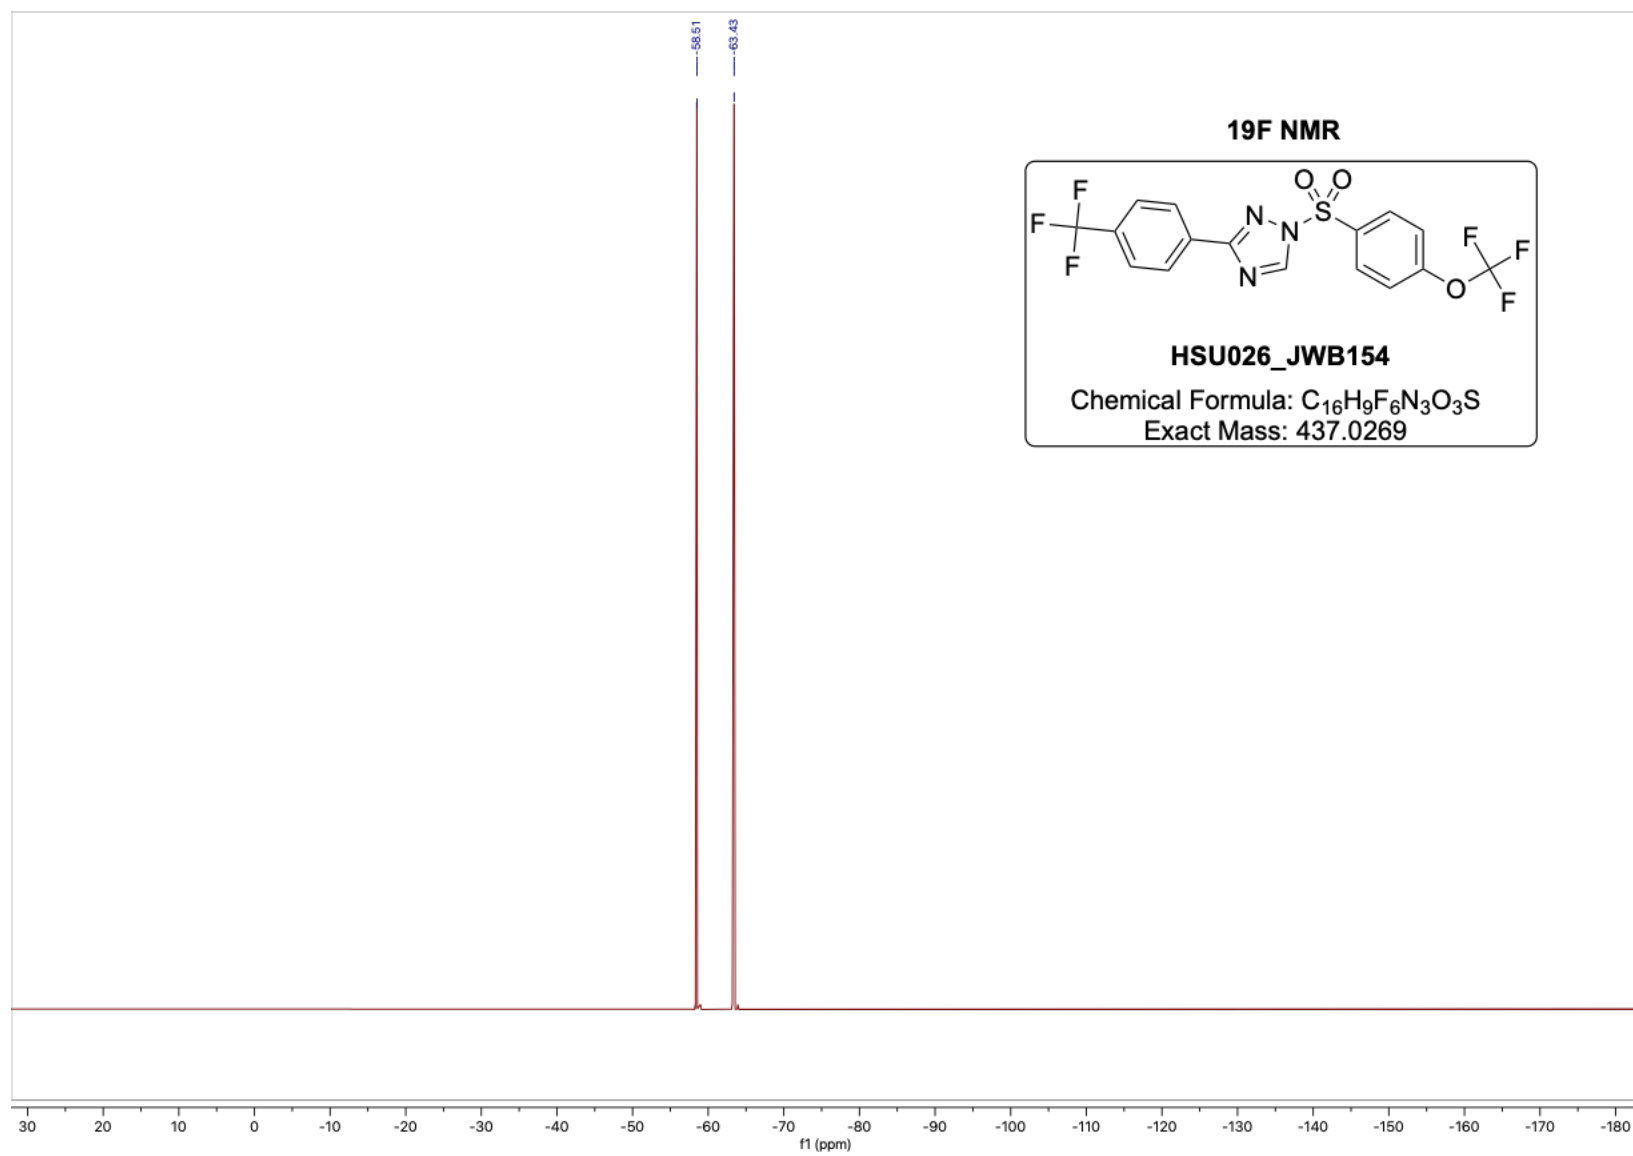

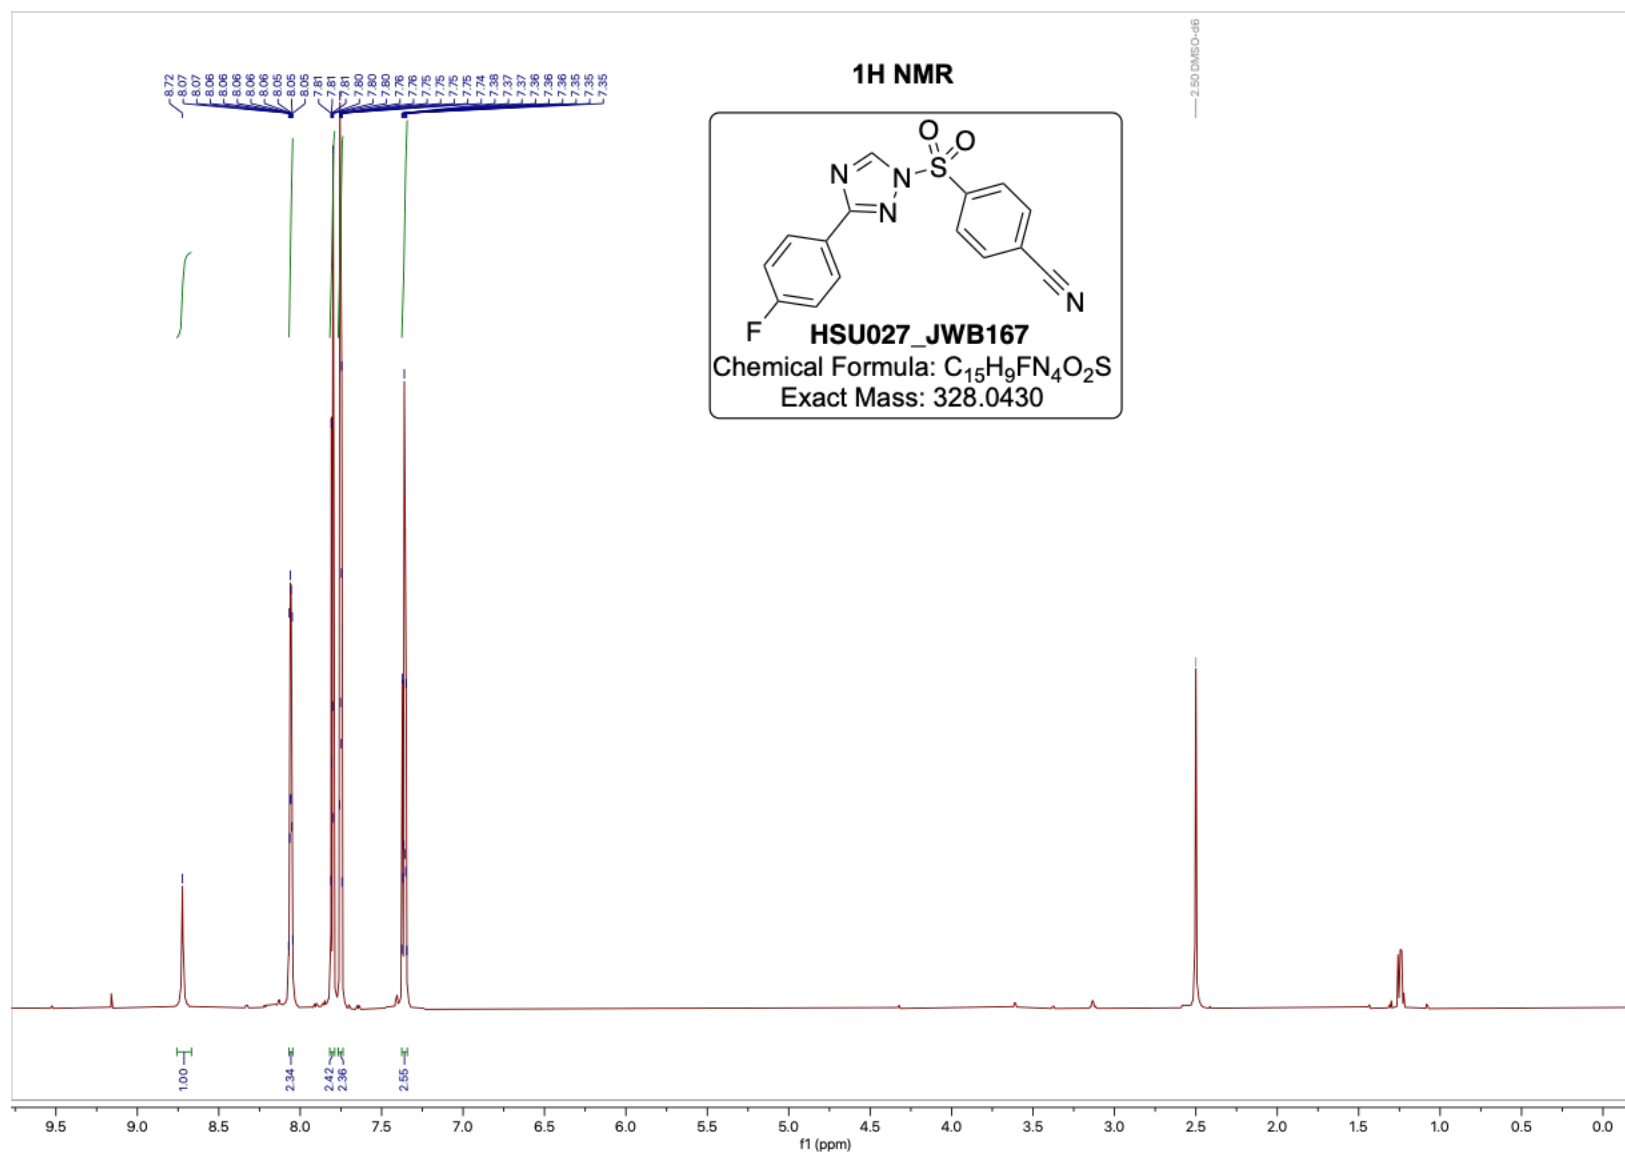

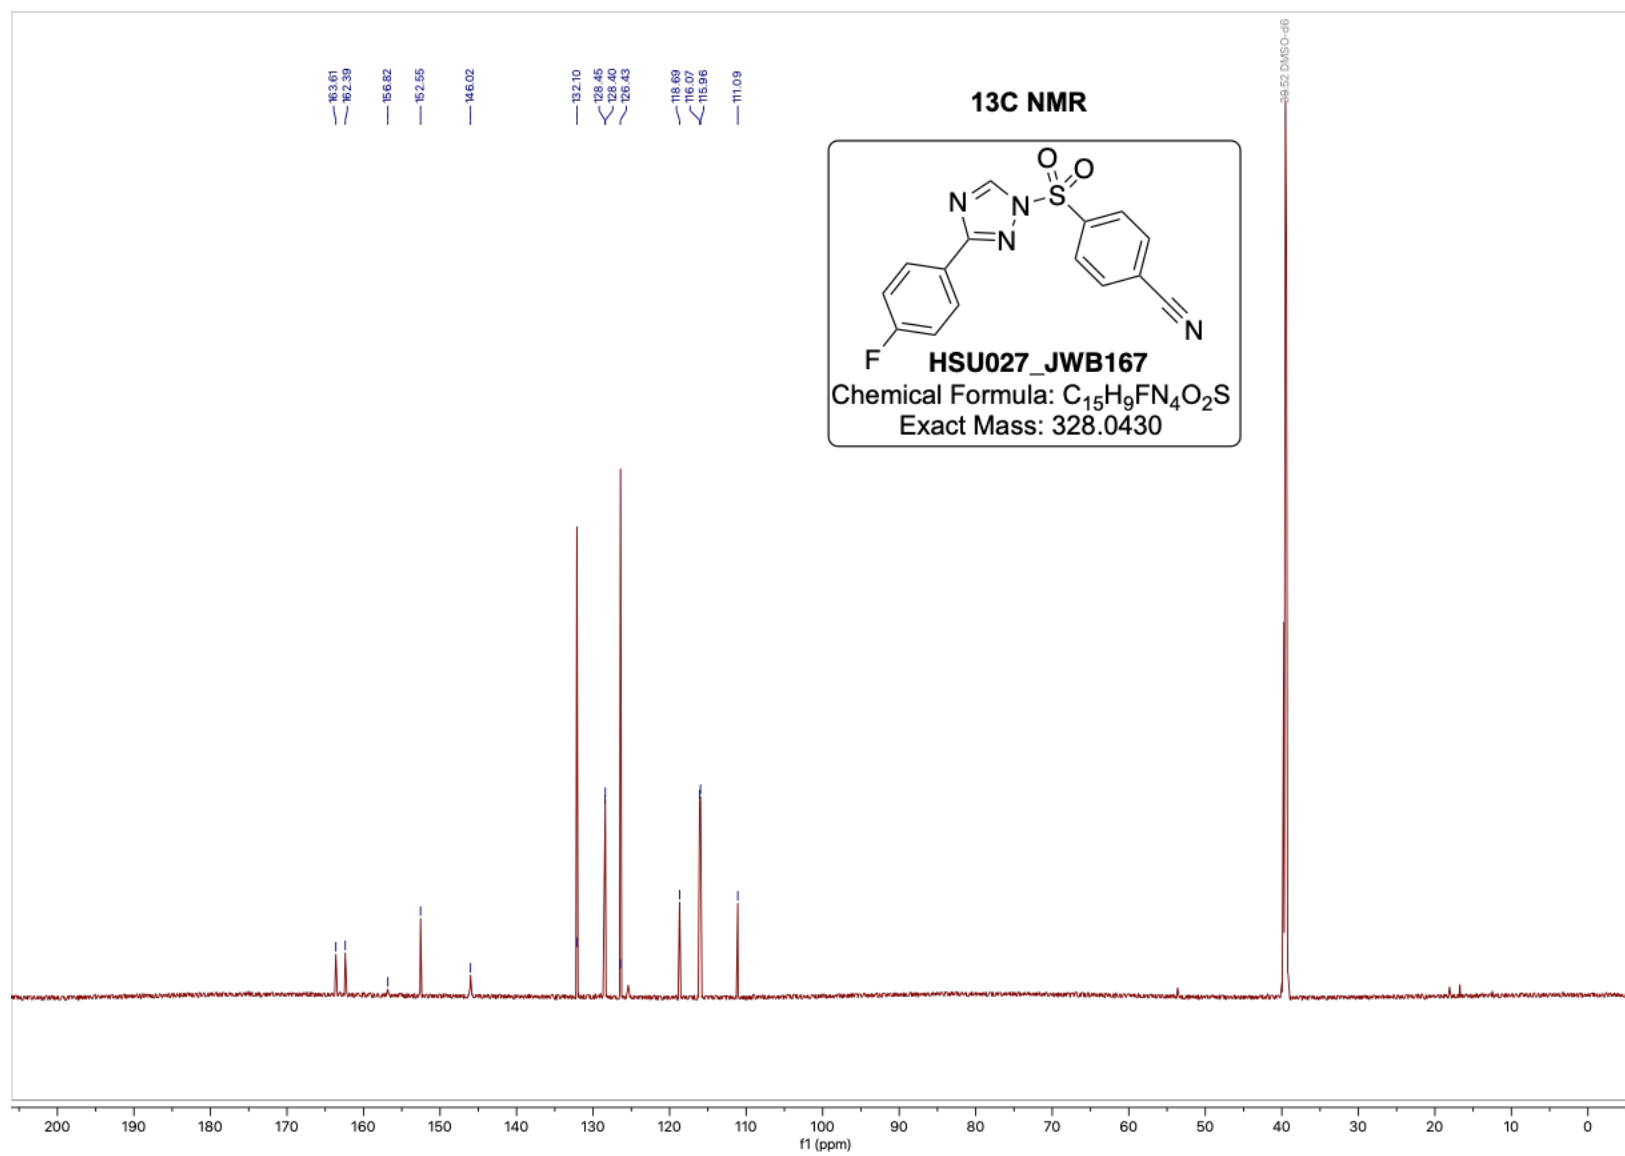

-111.66  
-111.68  
-111.69  
-111.70  
-111.72  
-111.74

# **<sup>19</sup>F NMR**

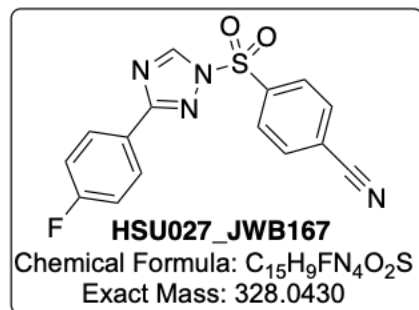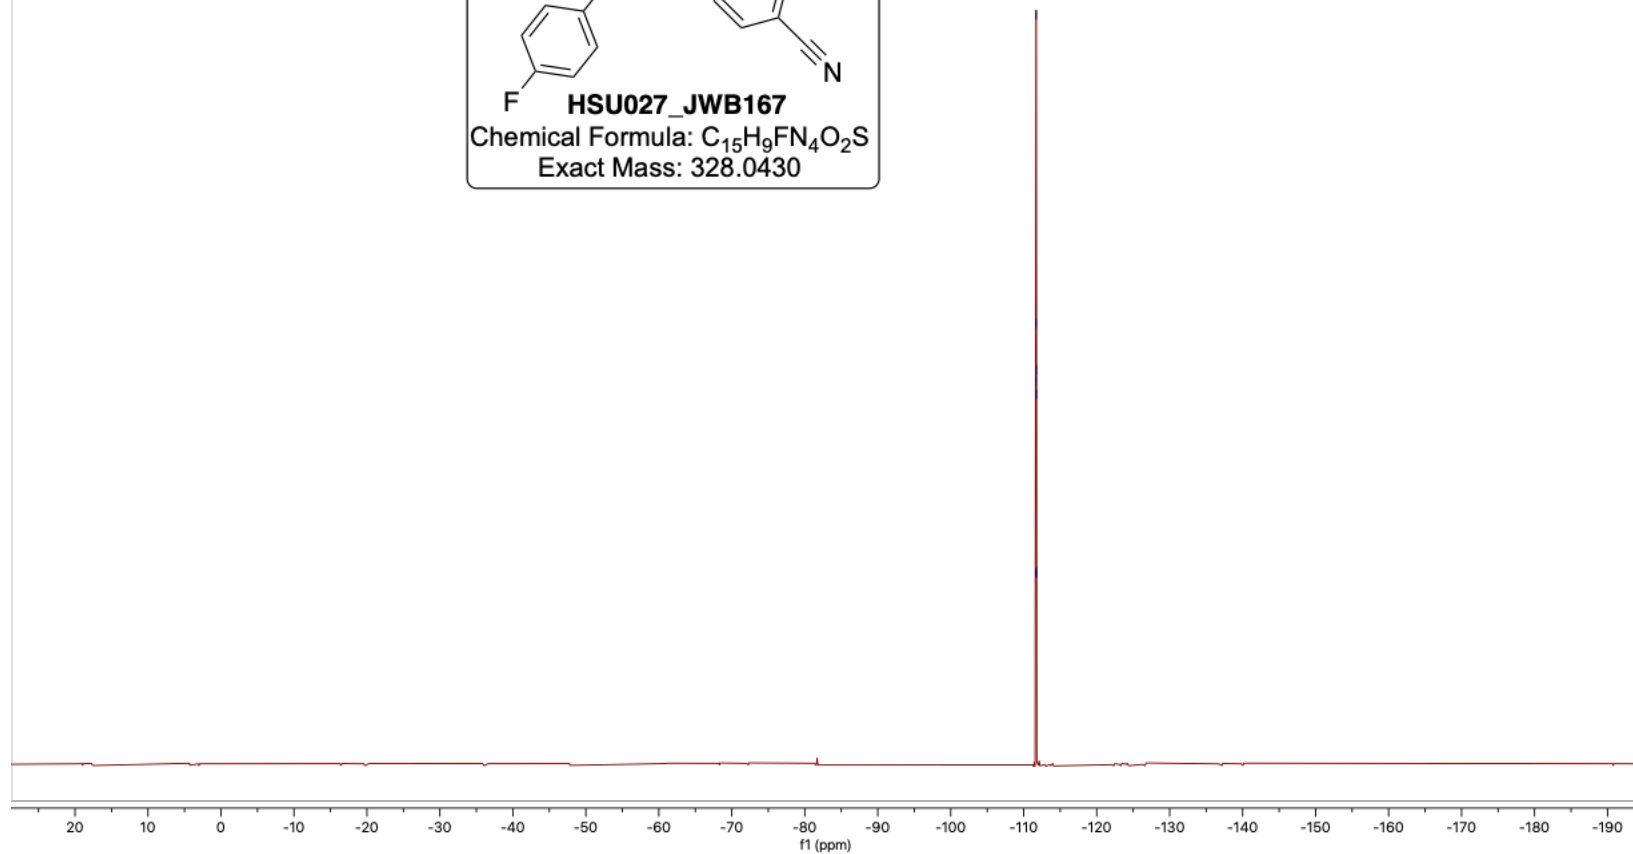

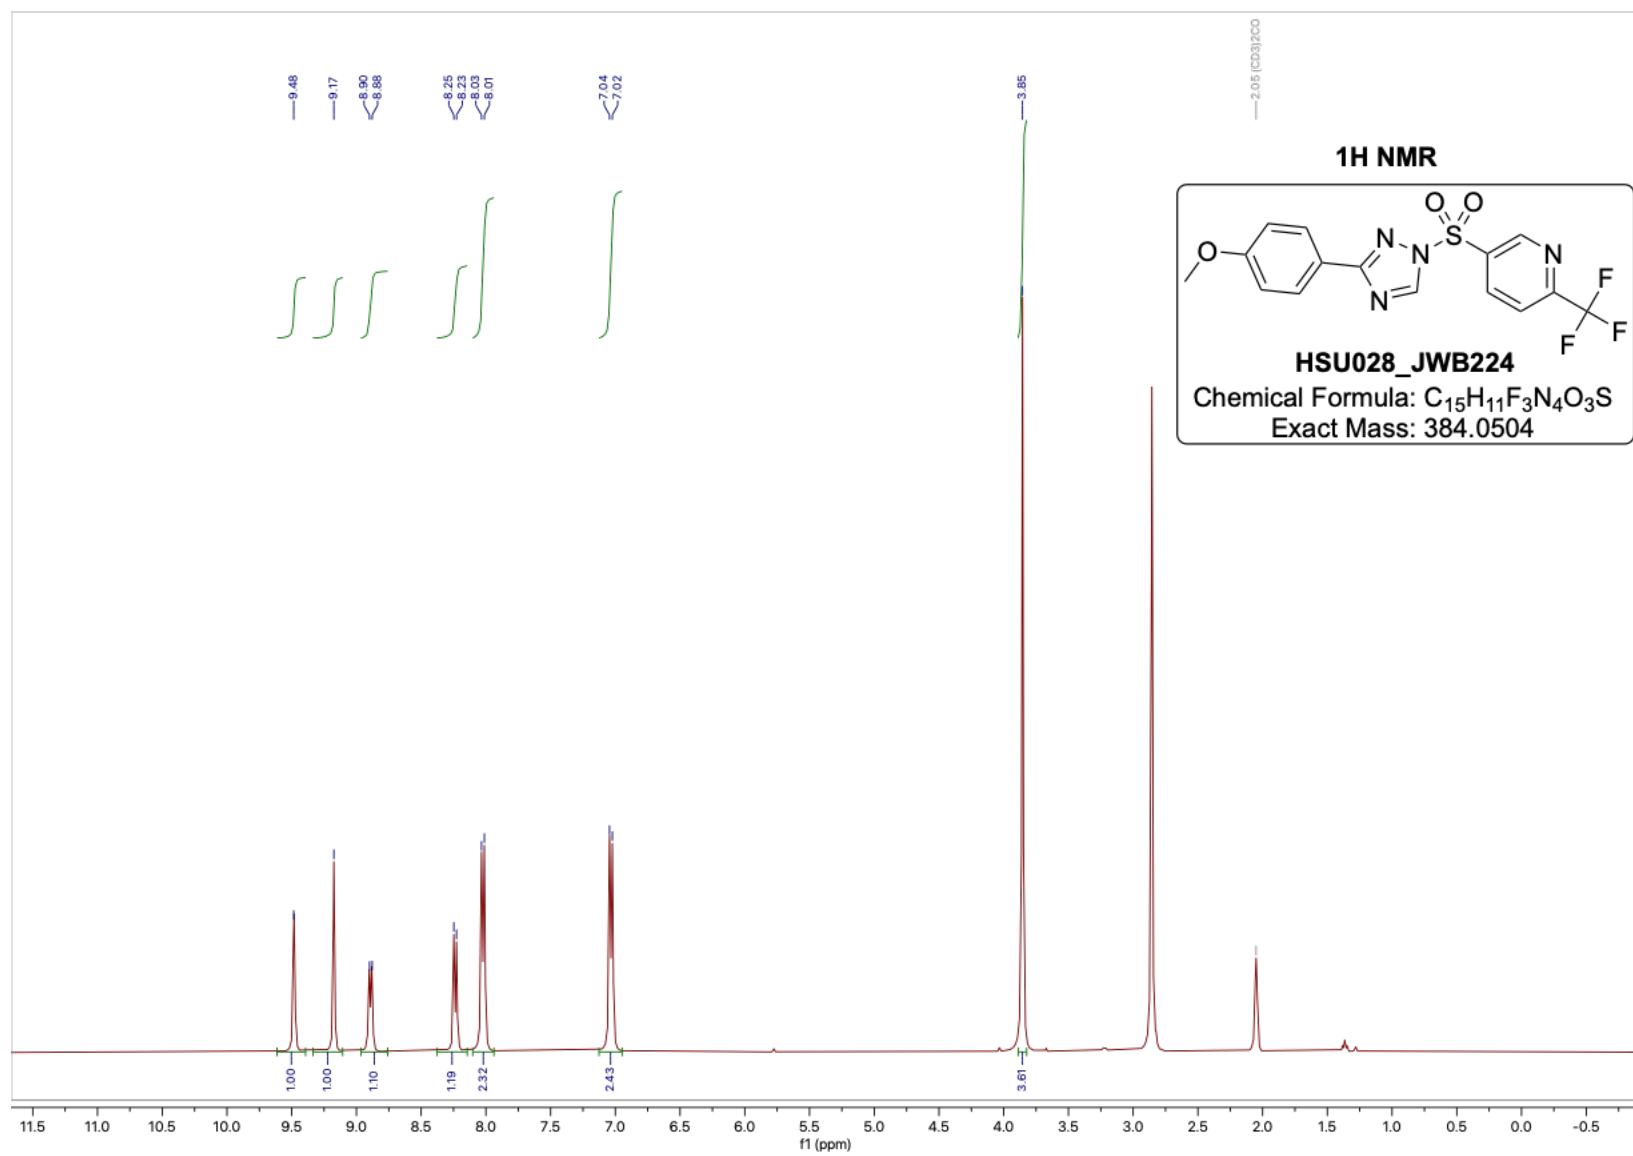

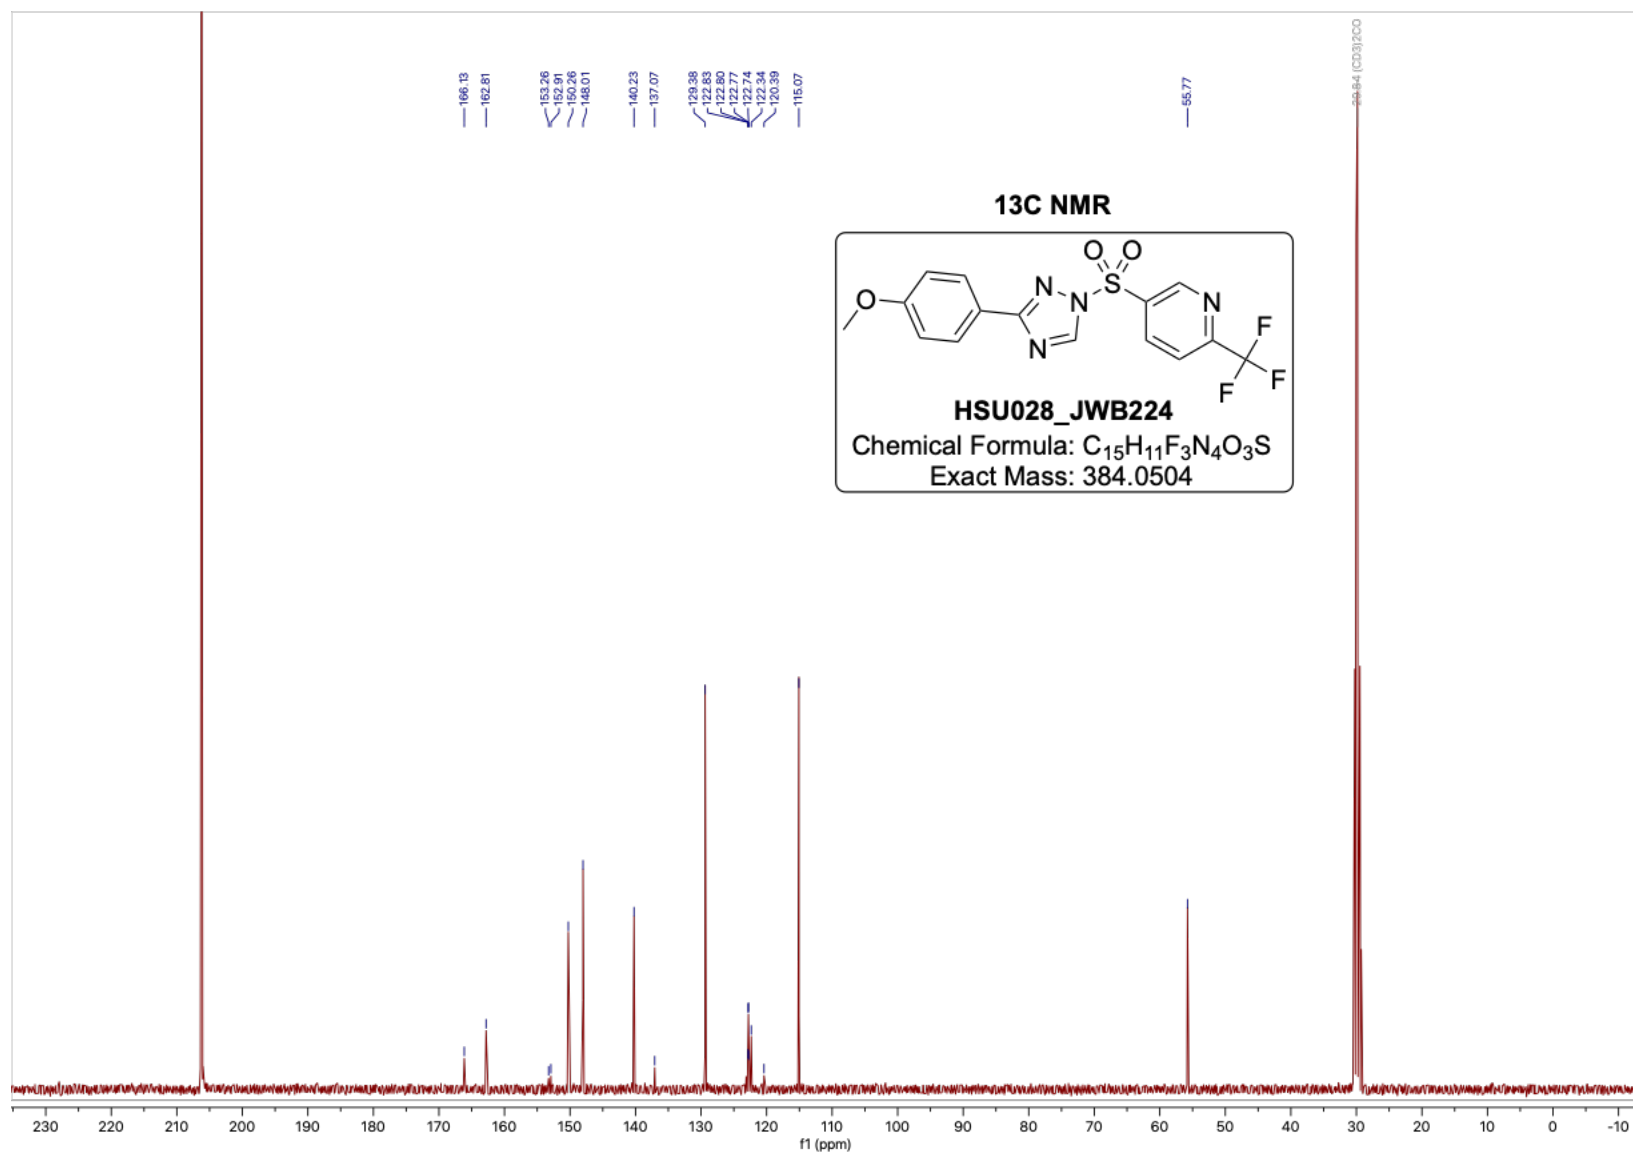

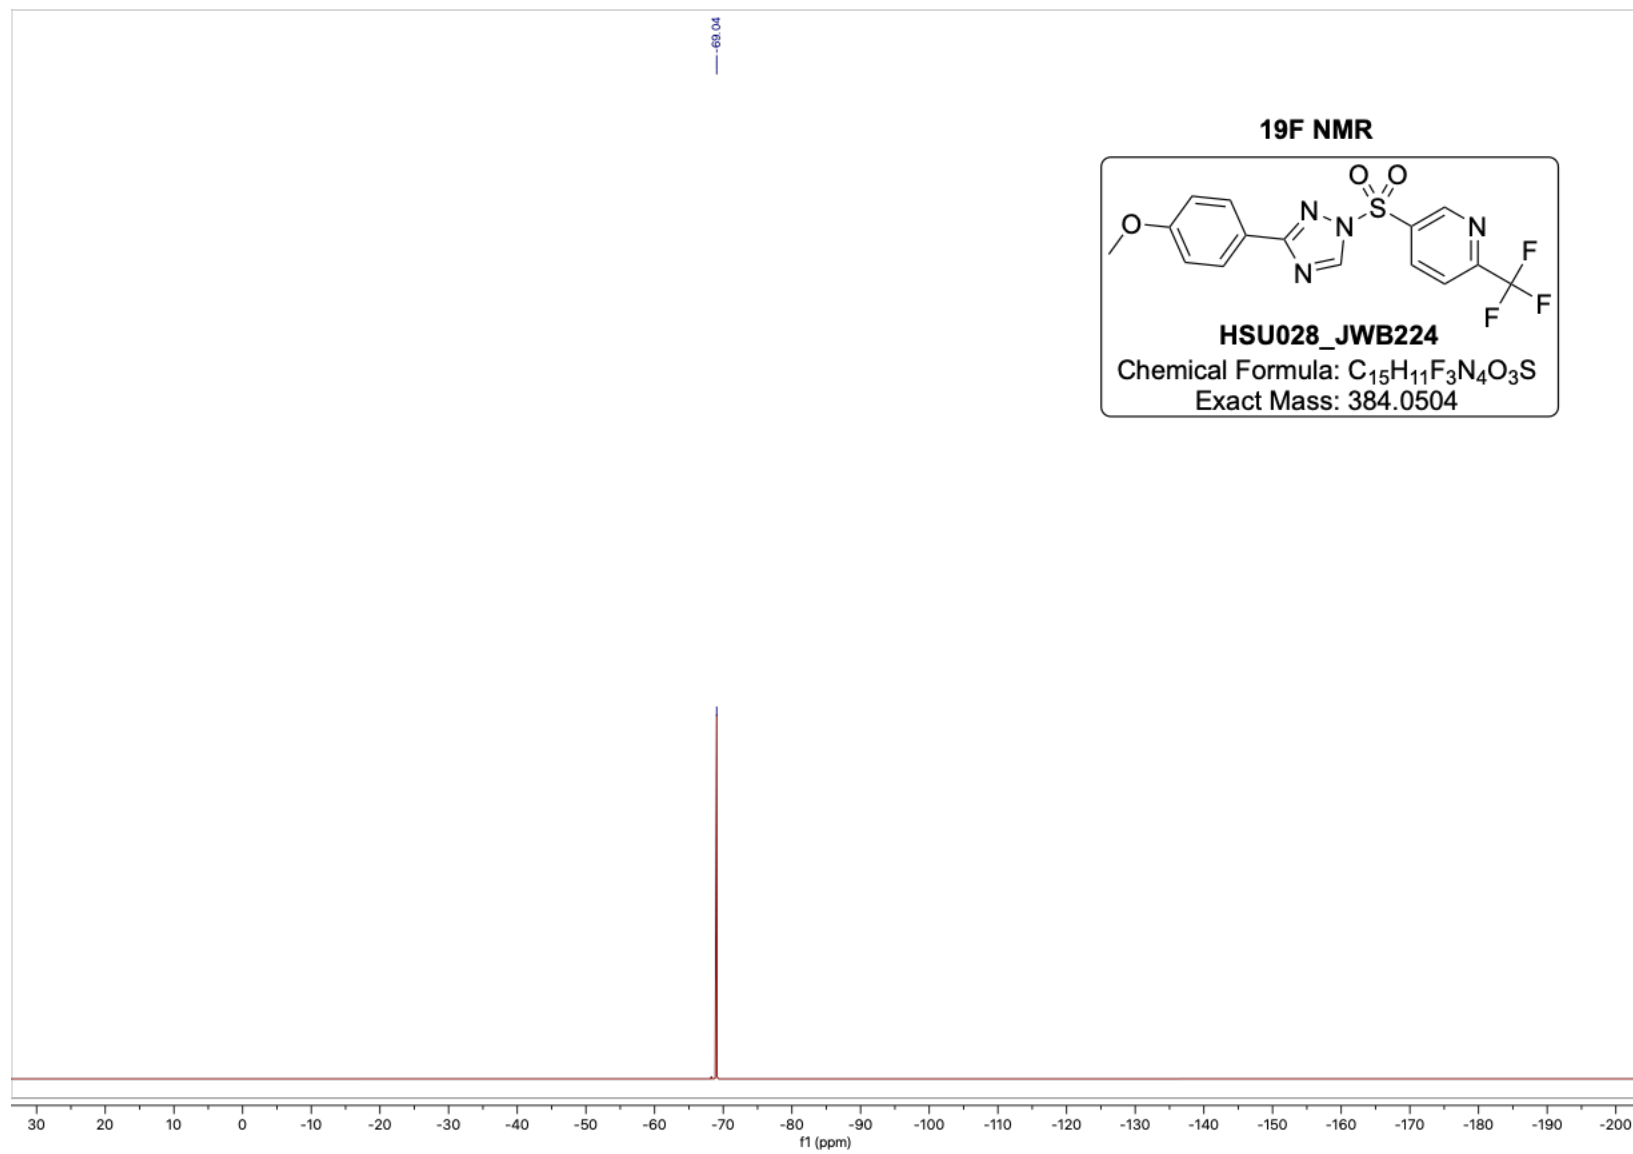





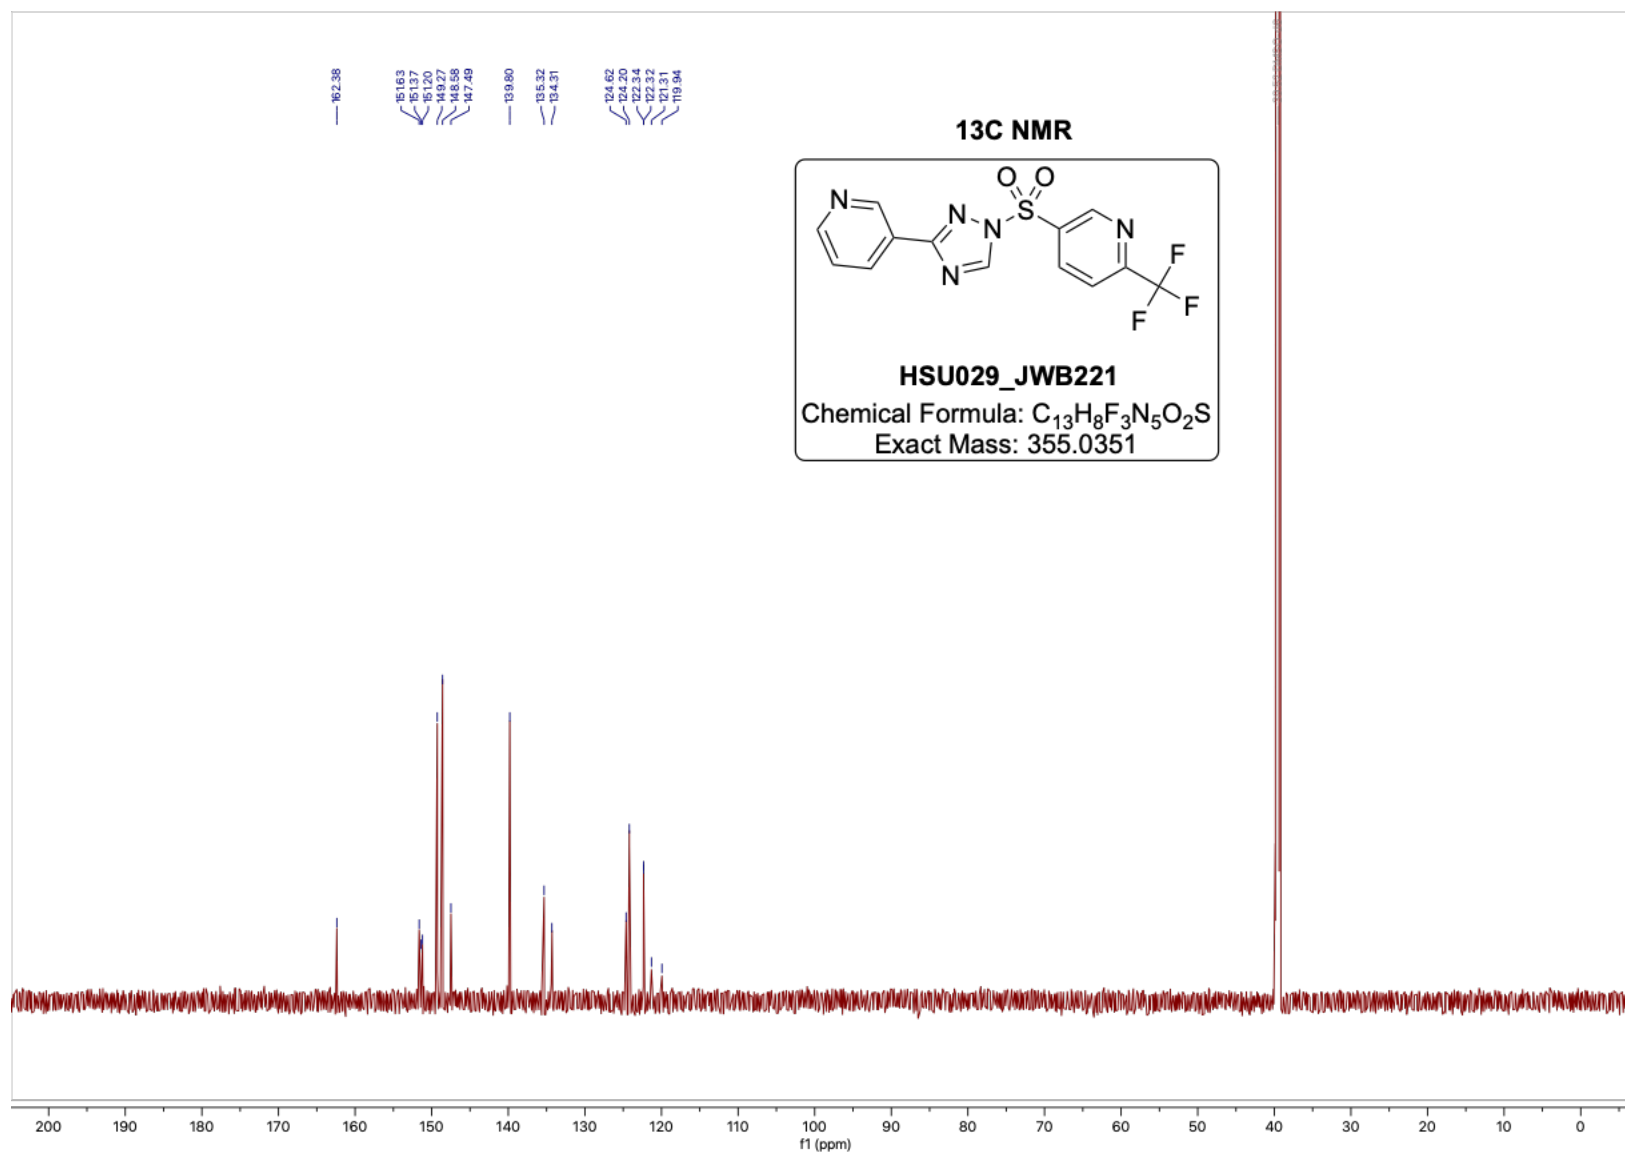

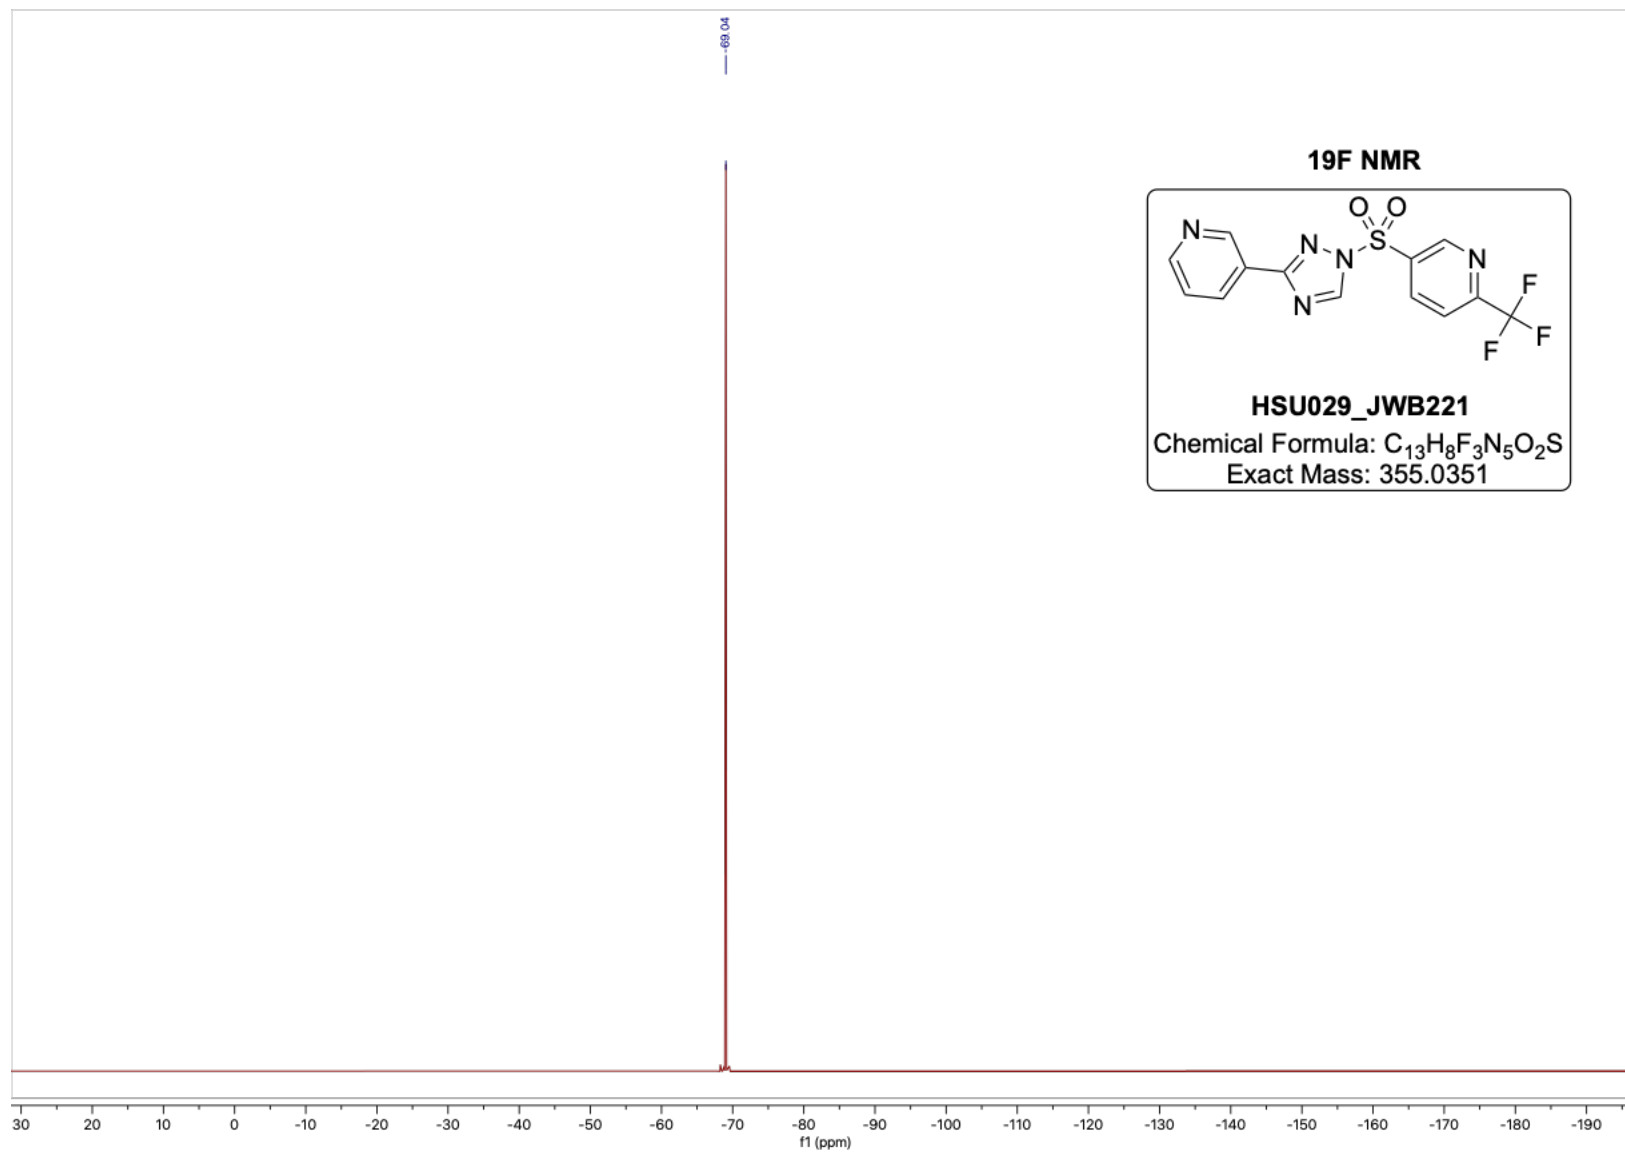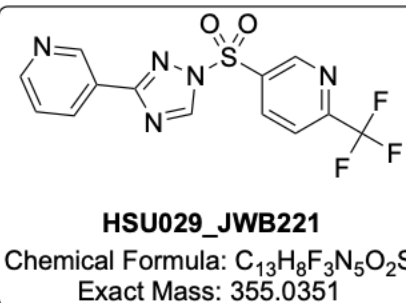

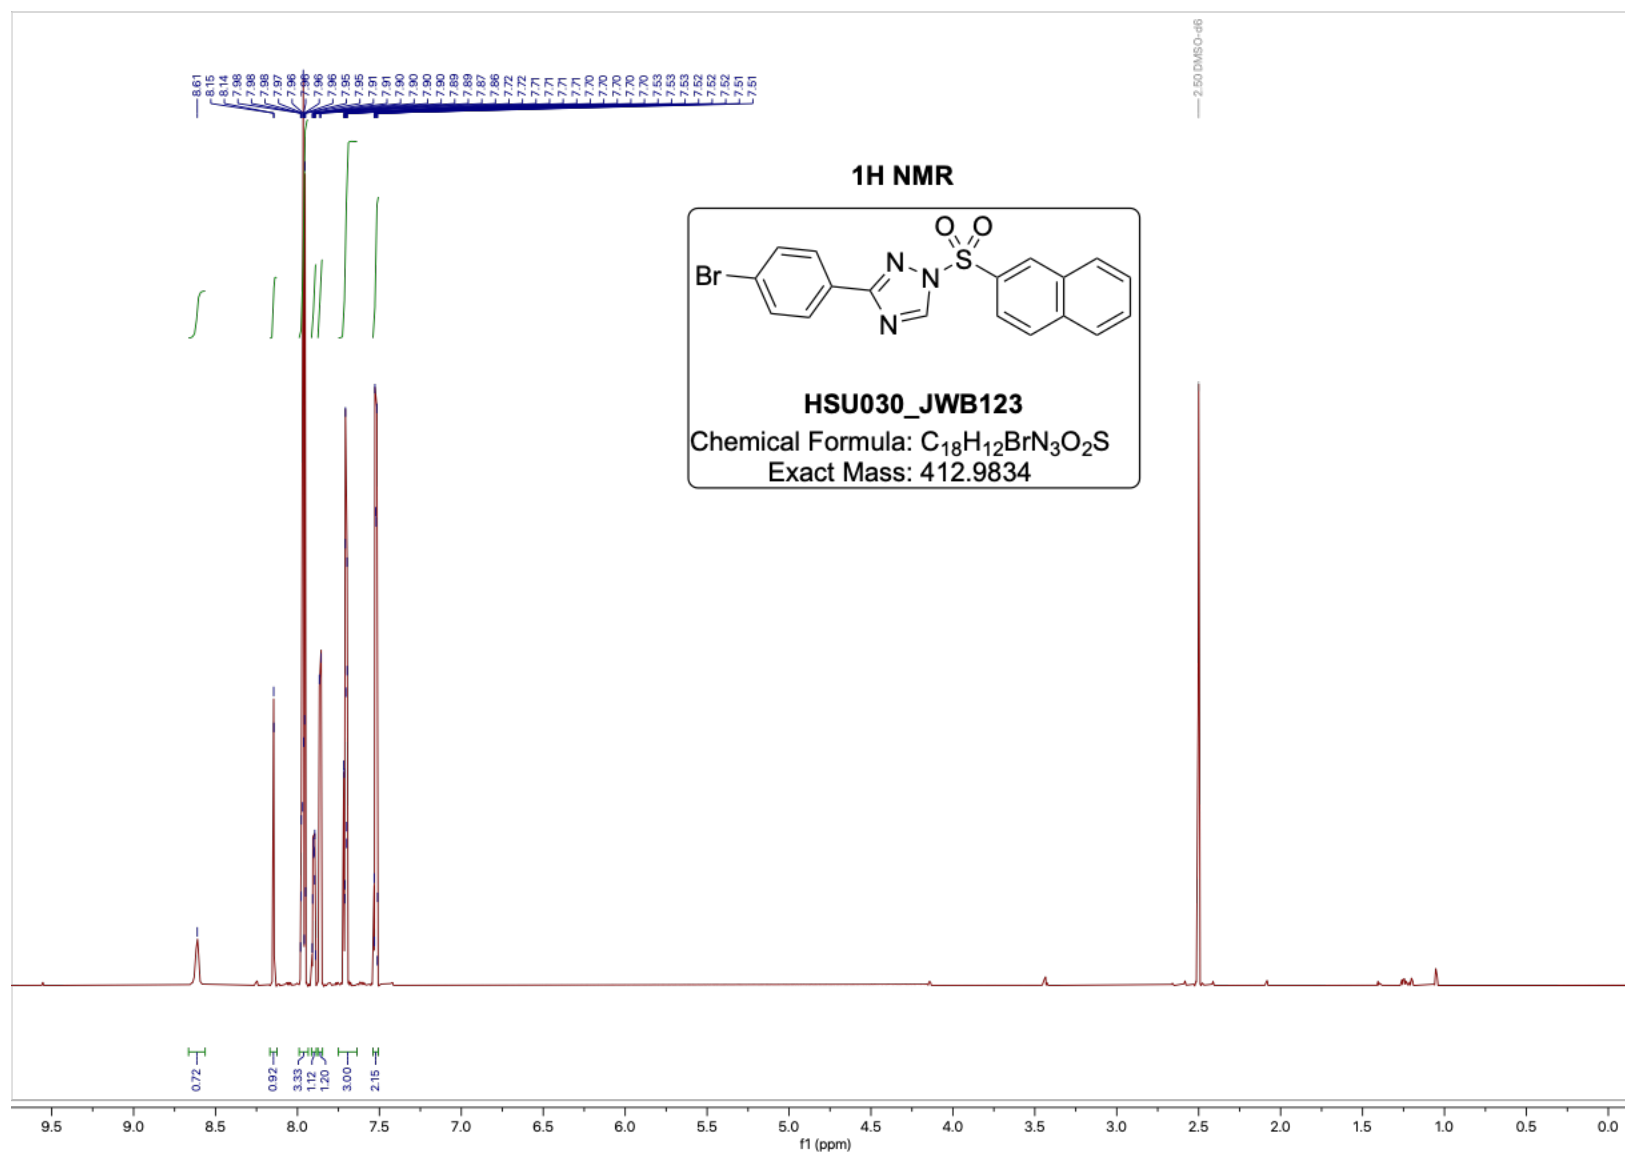

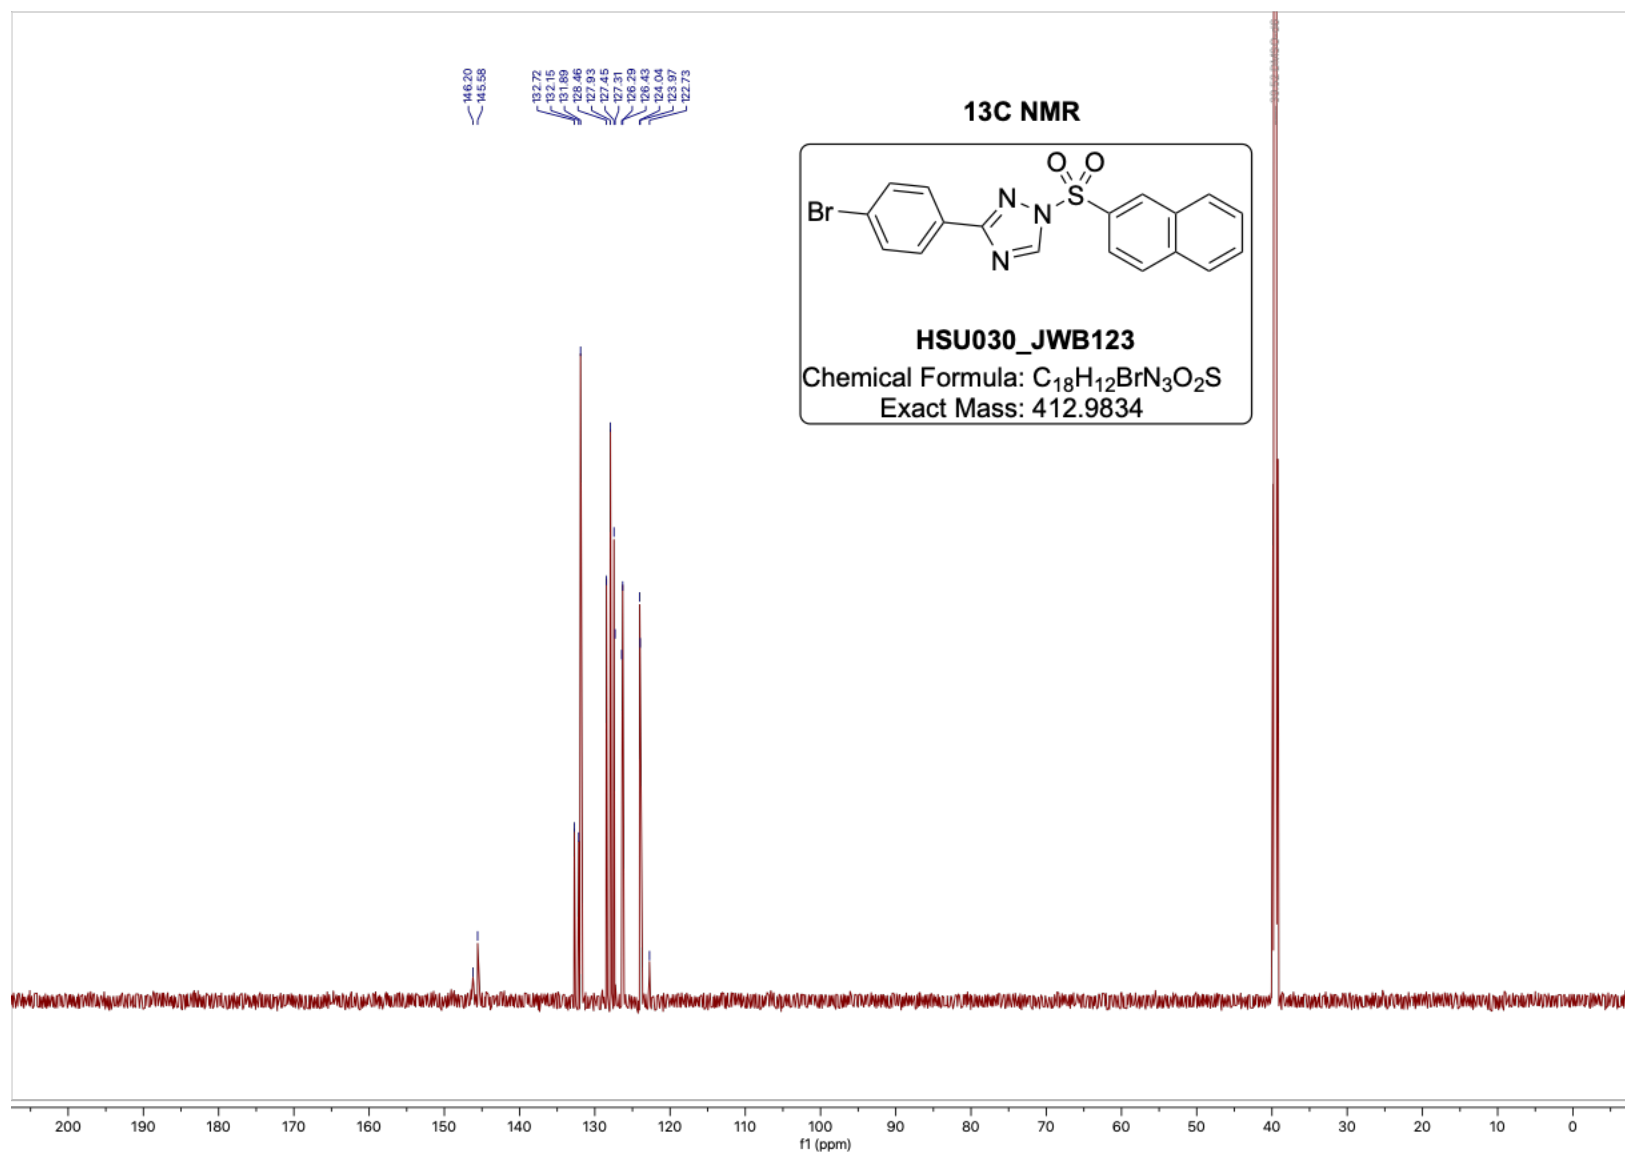

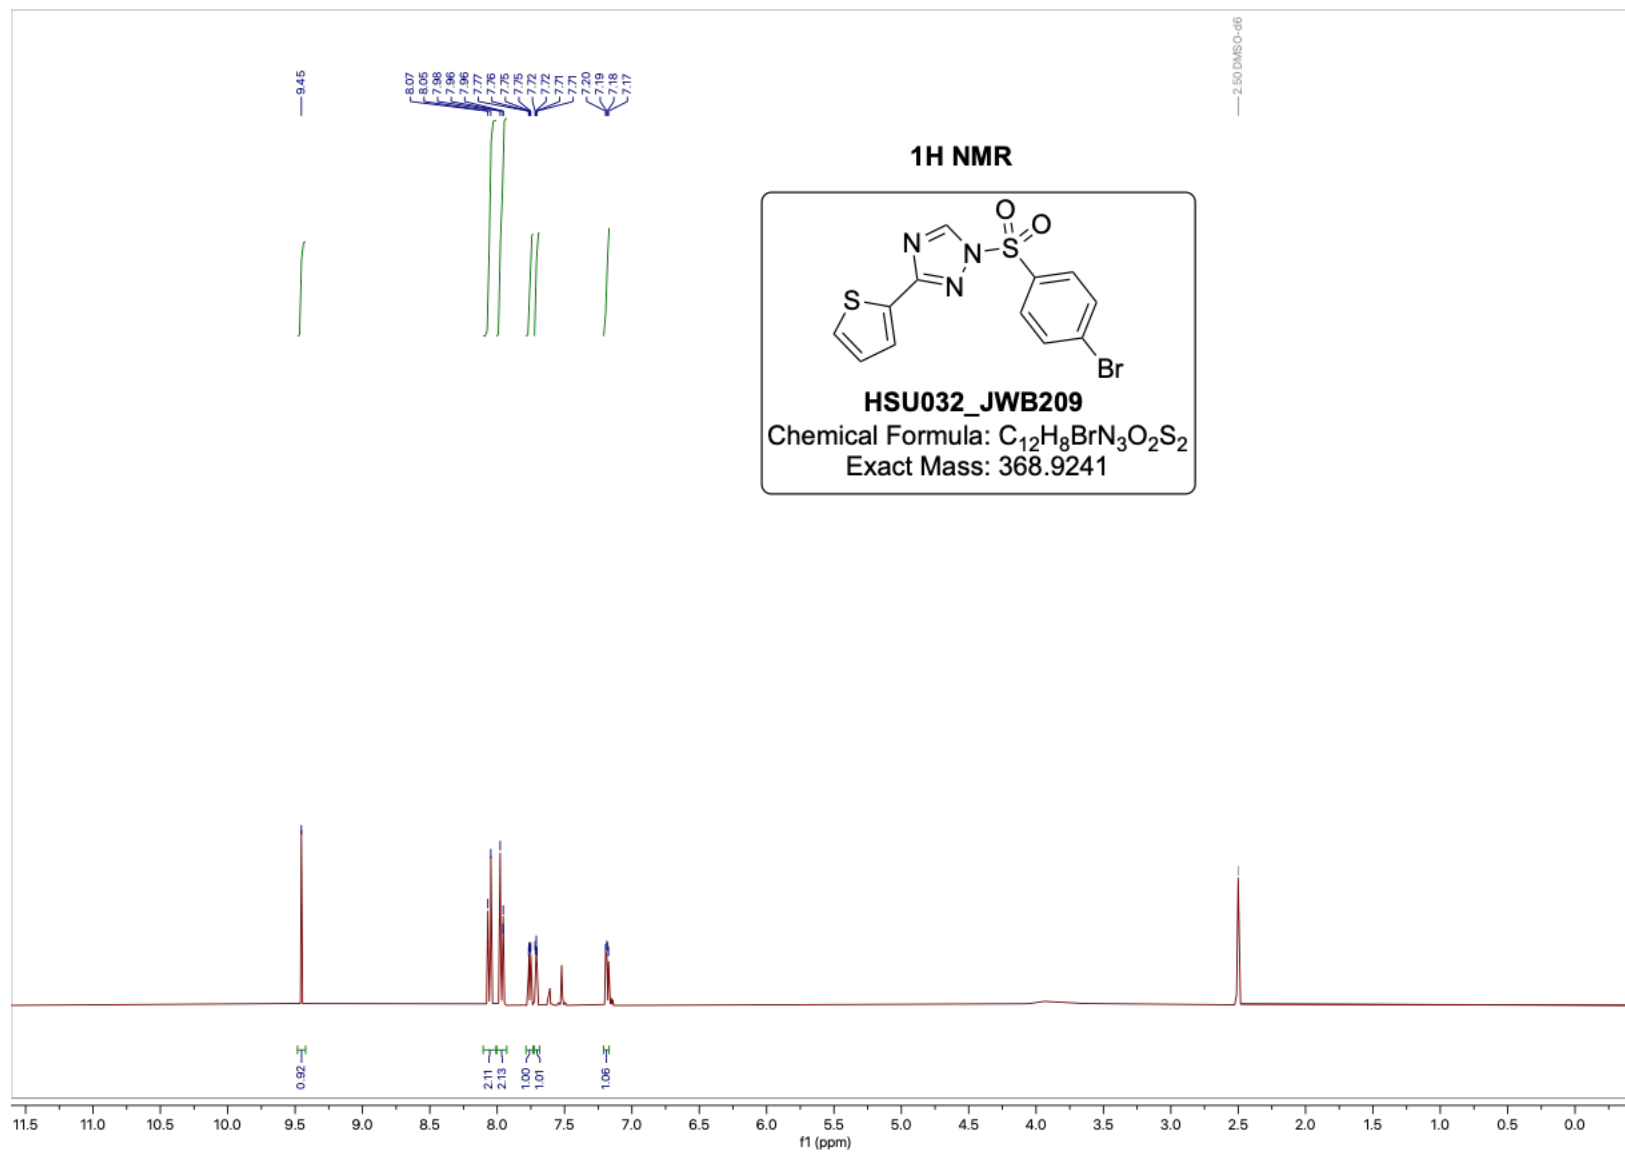

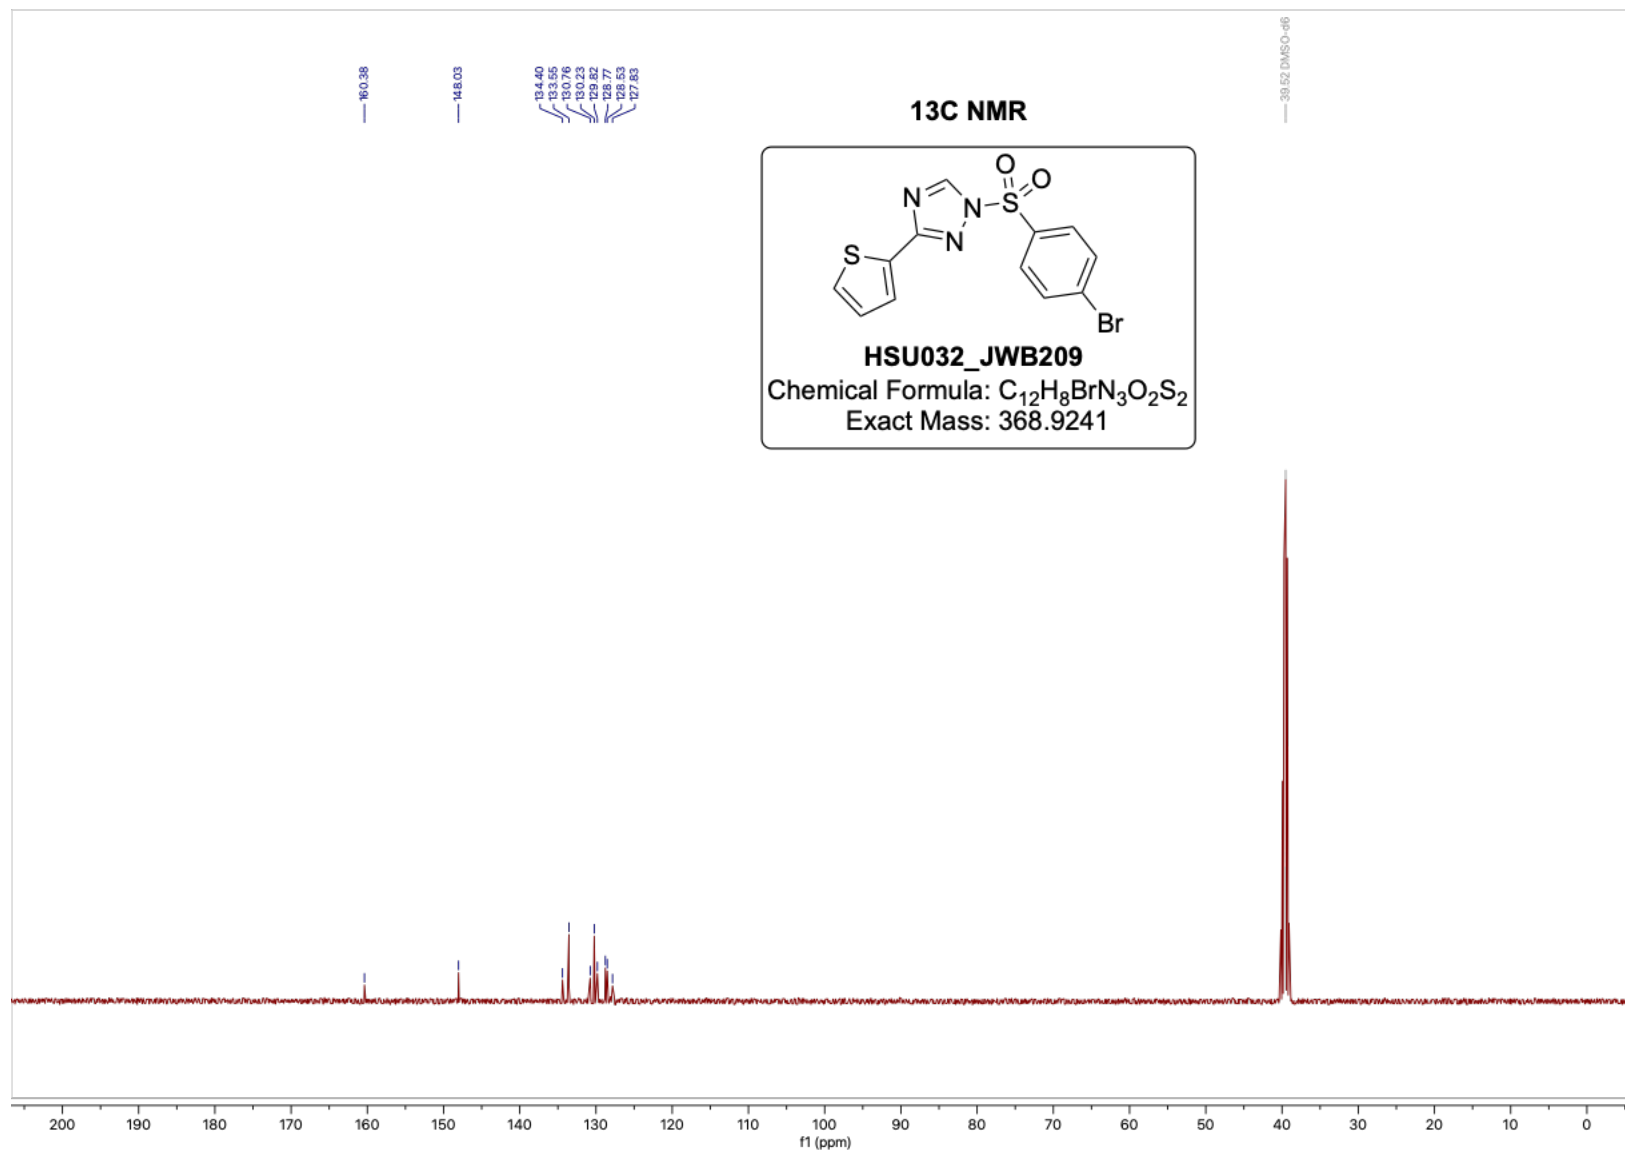

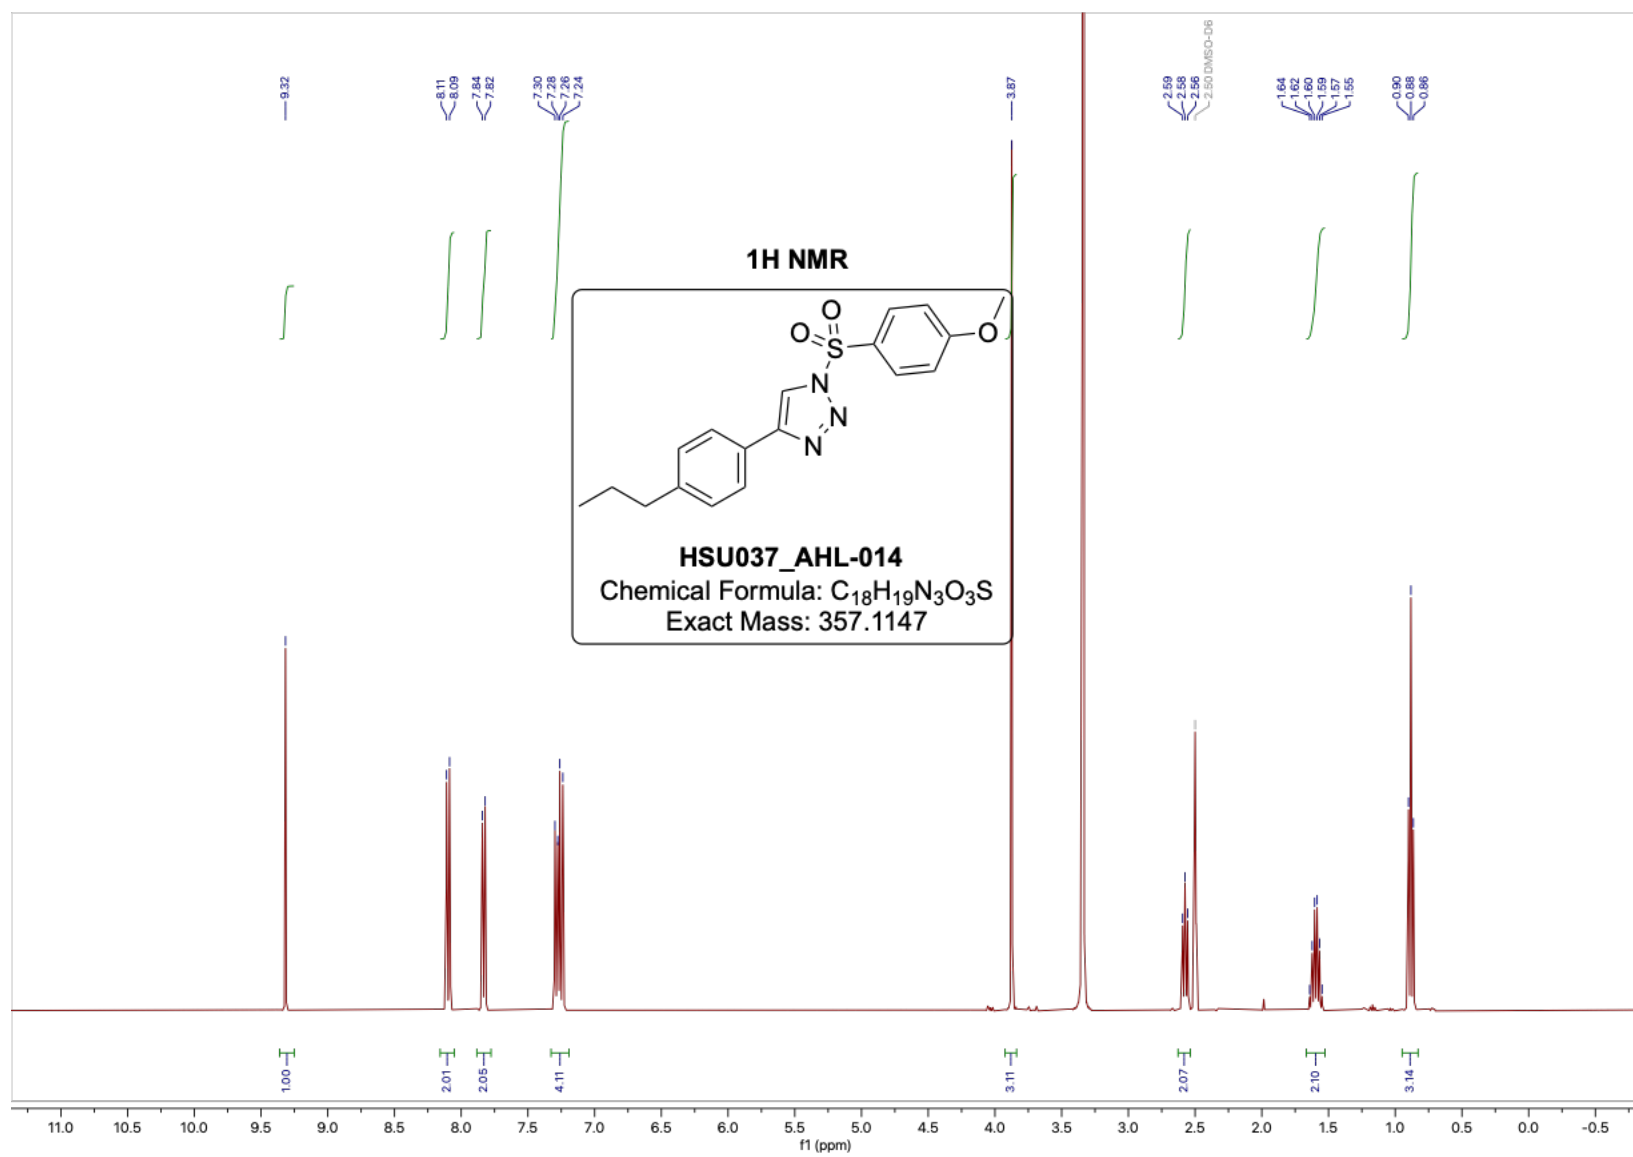

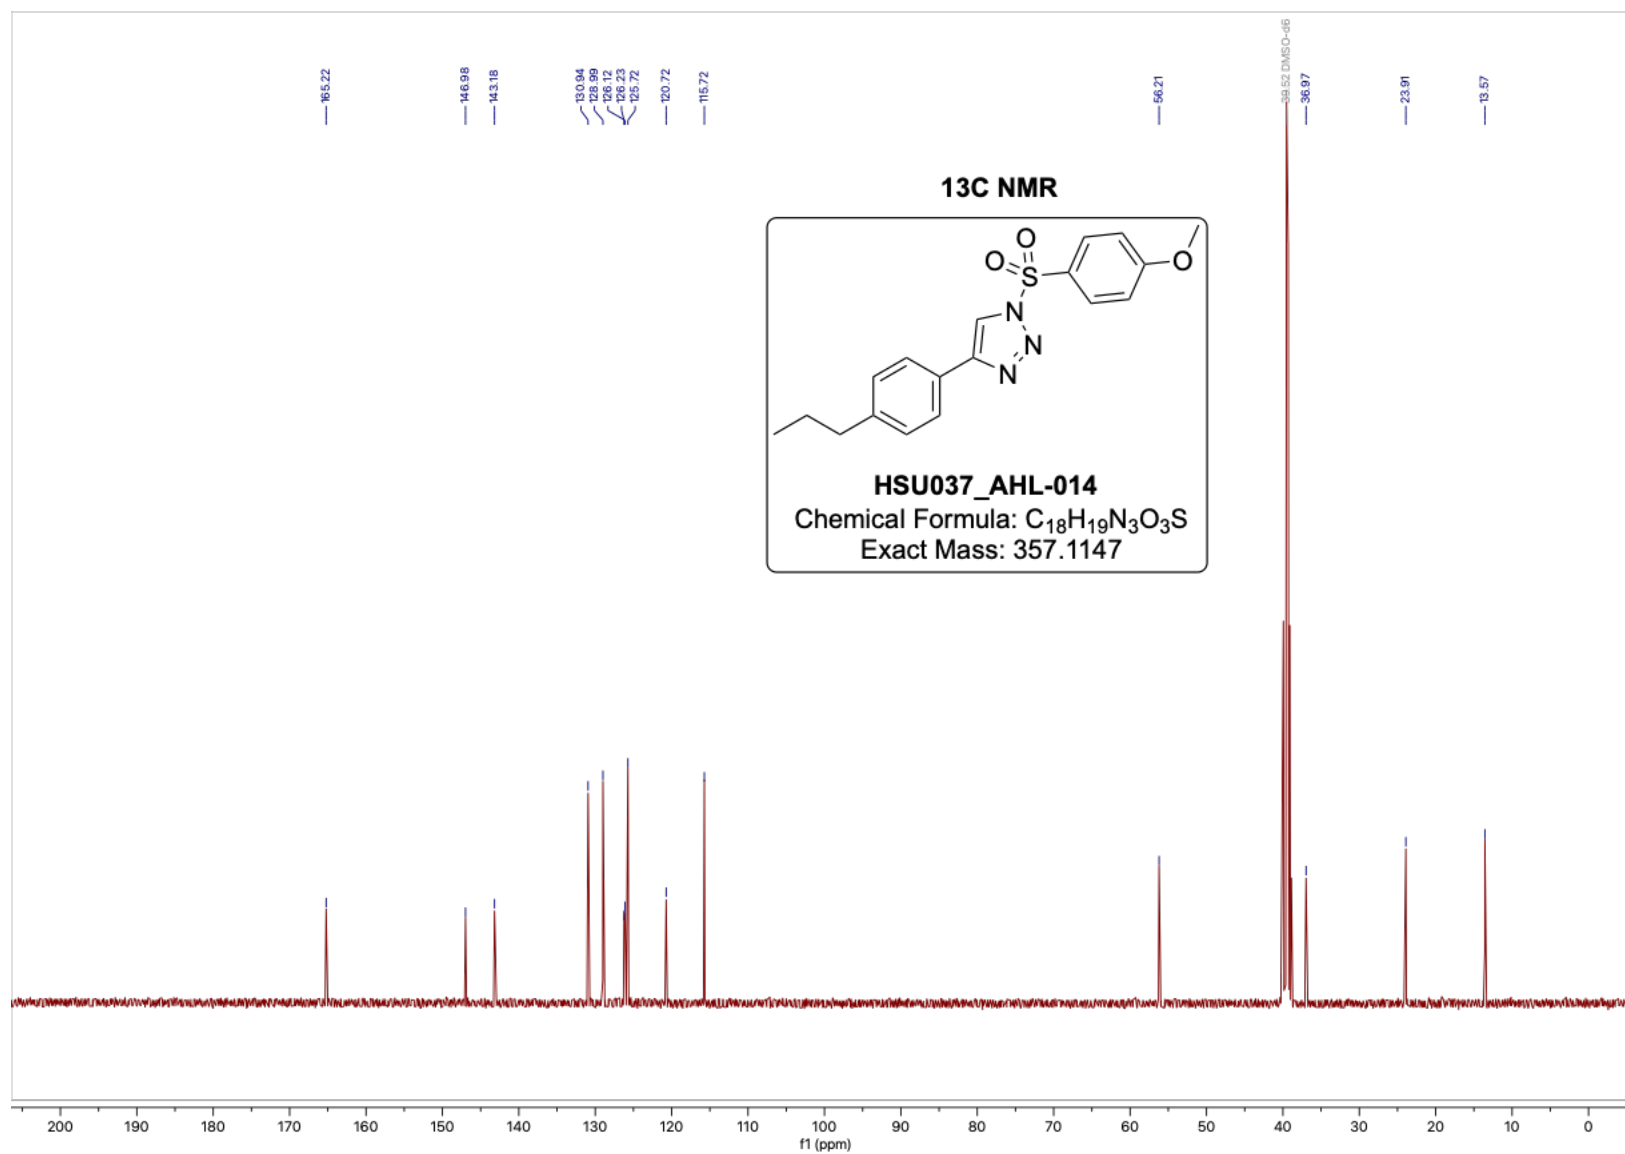



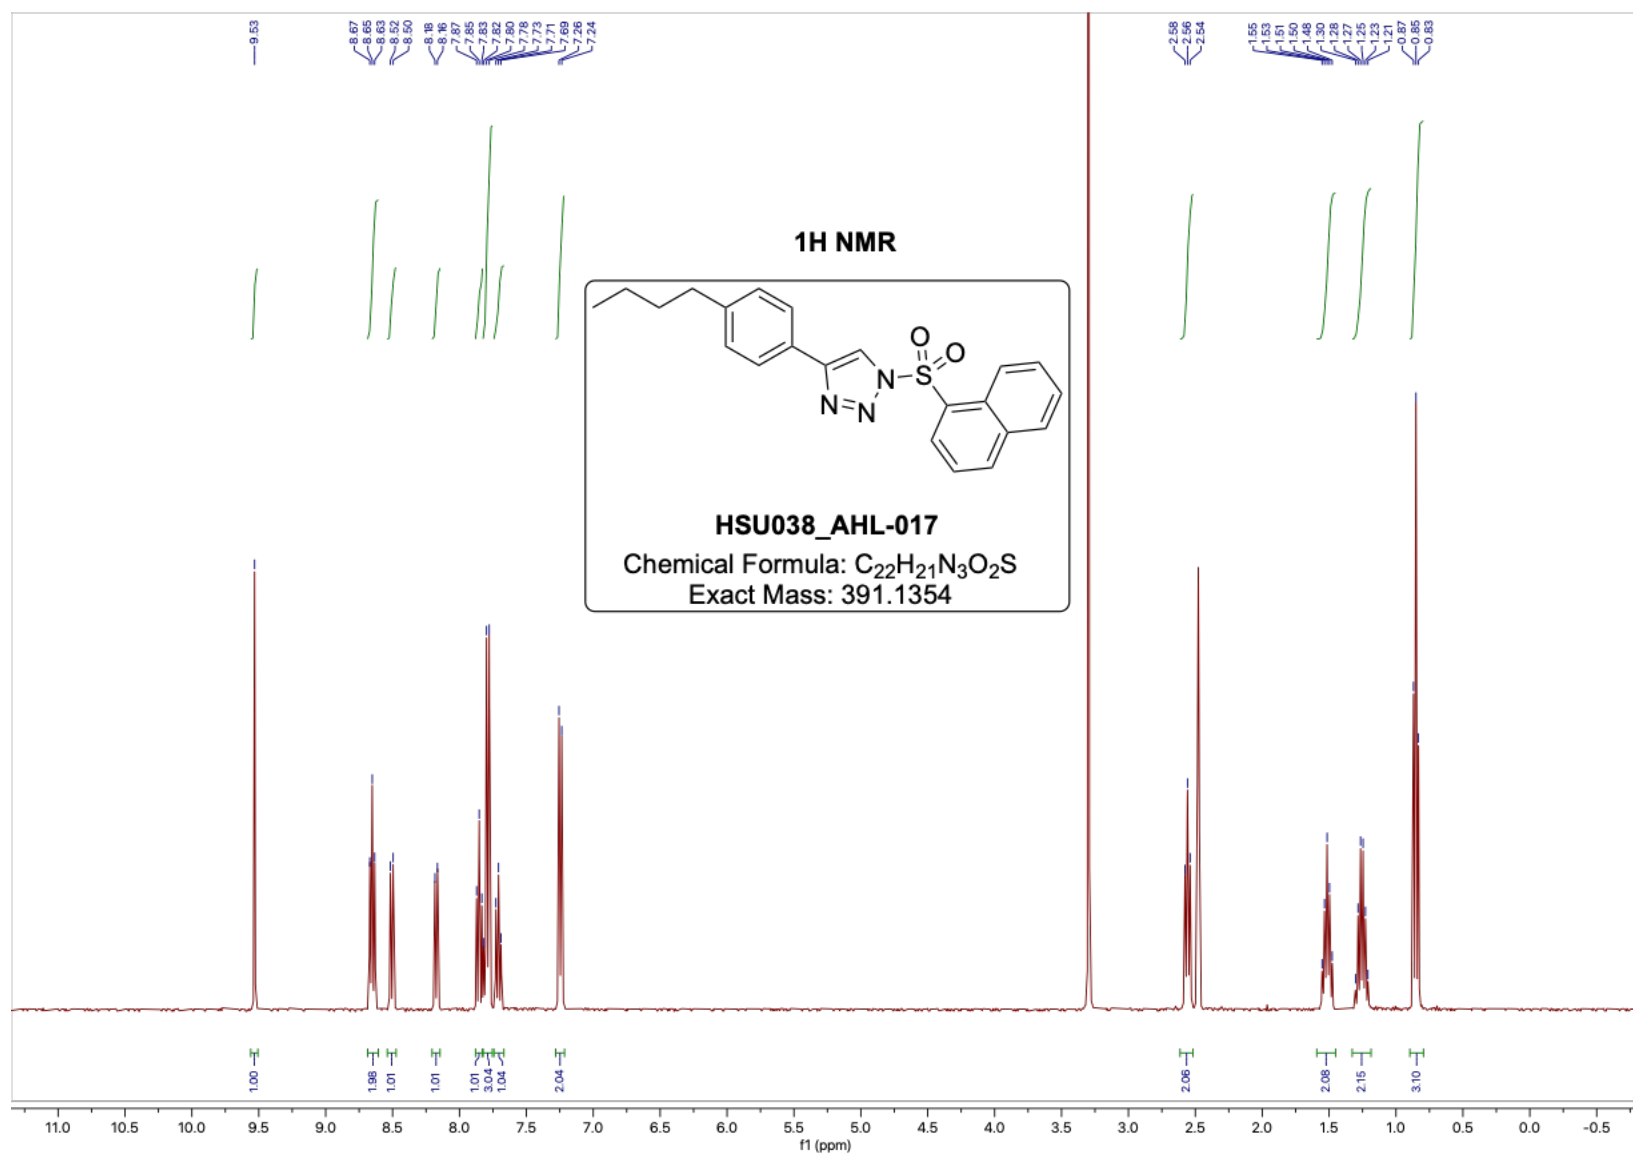

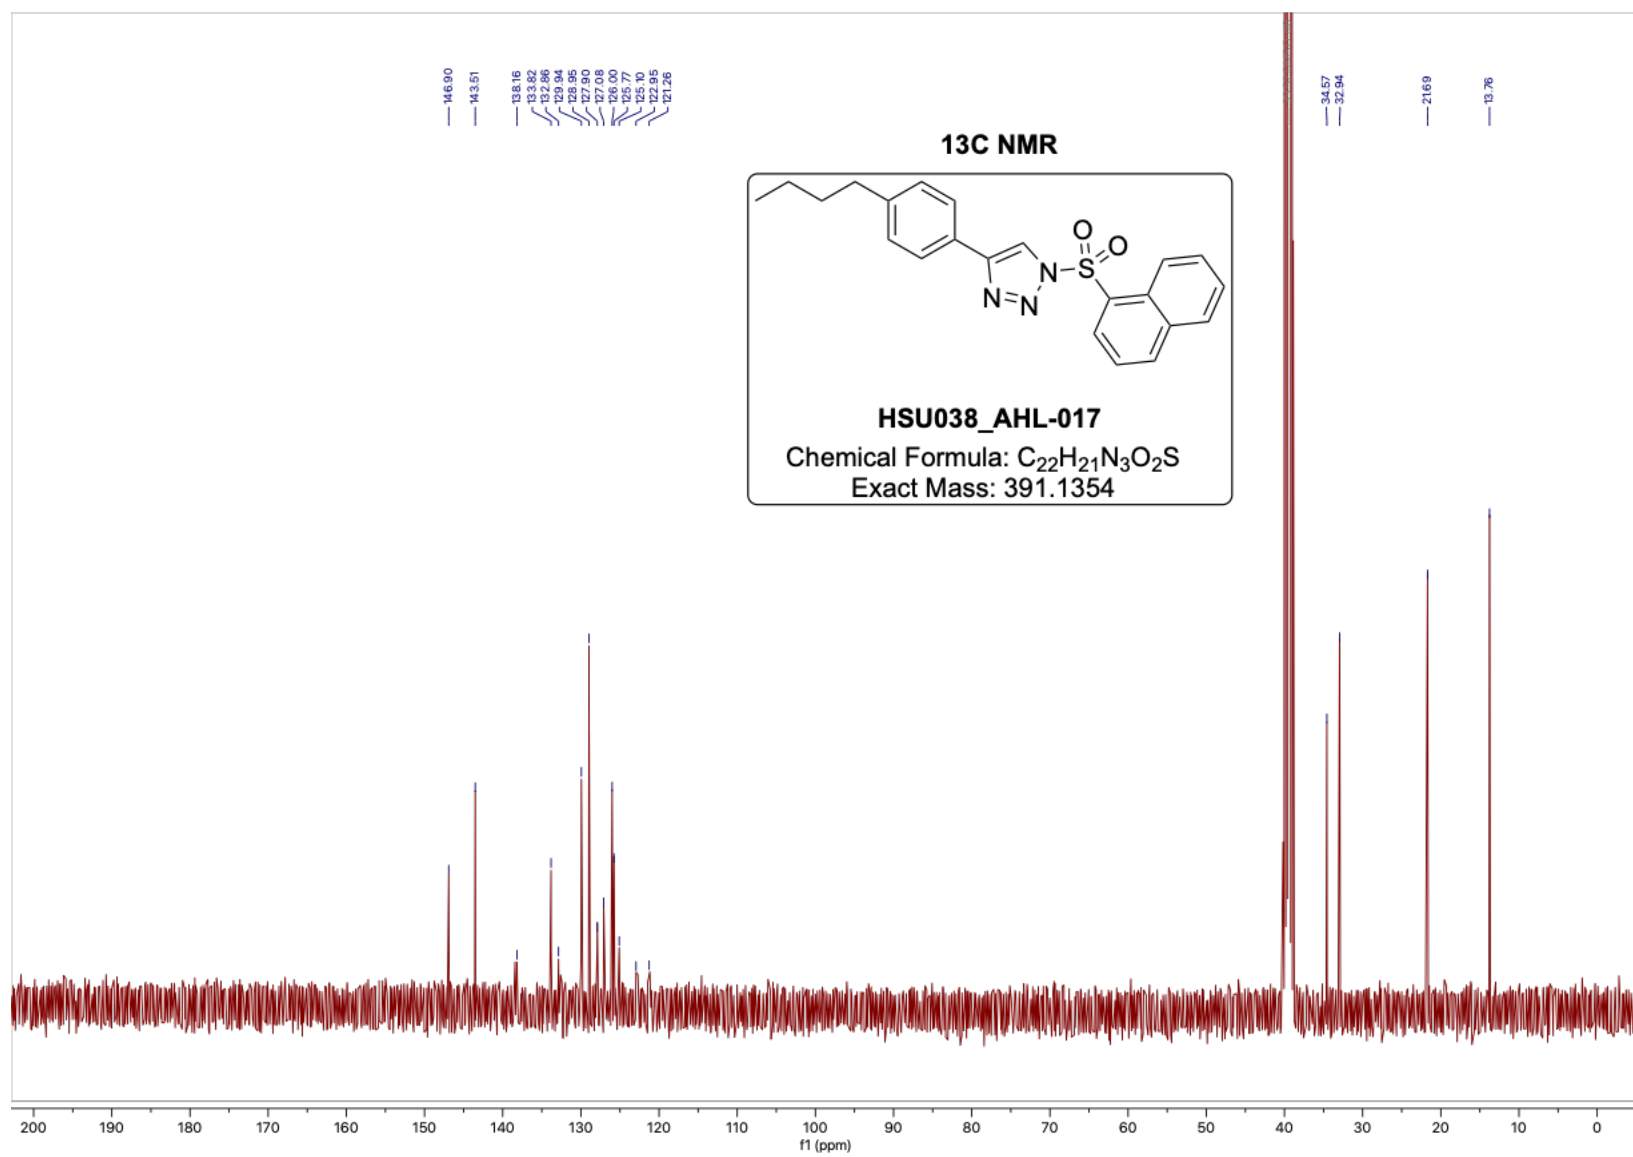

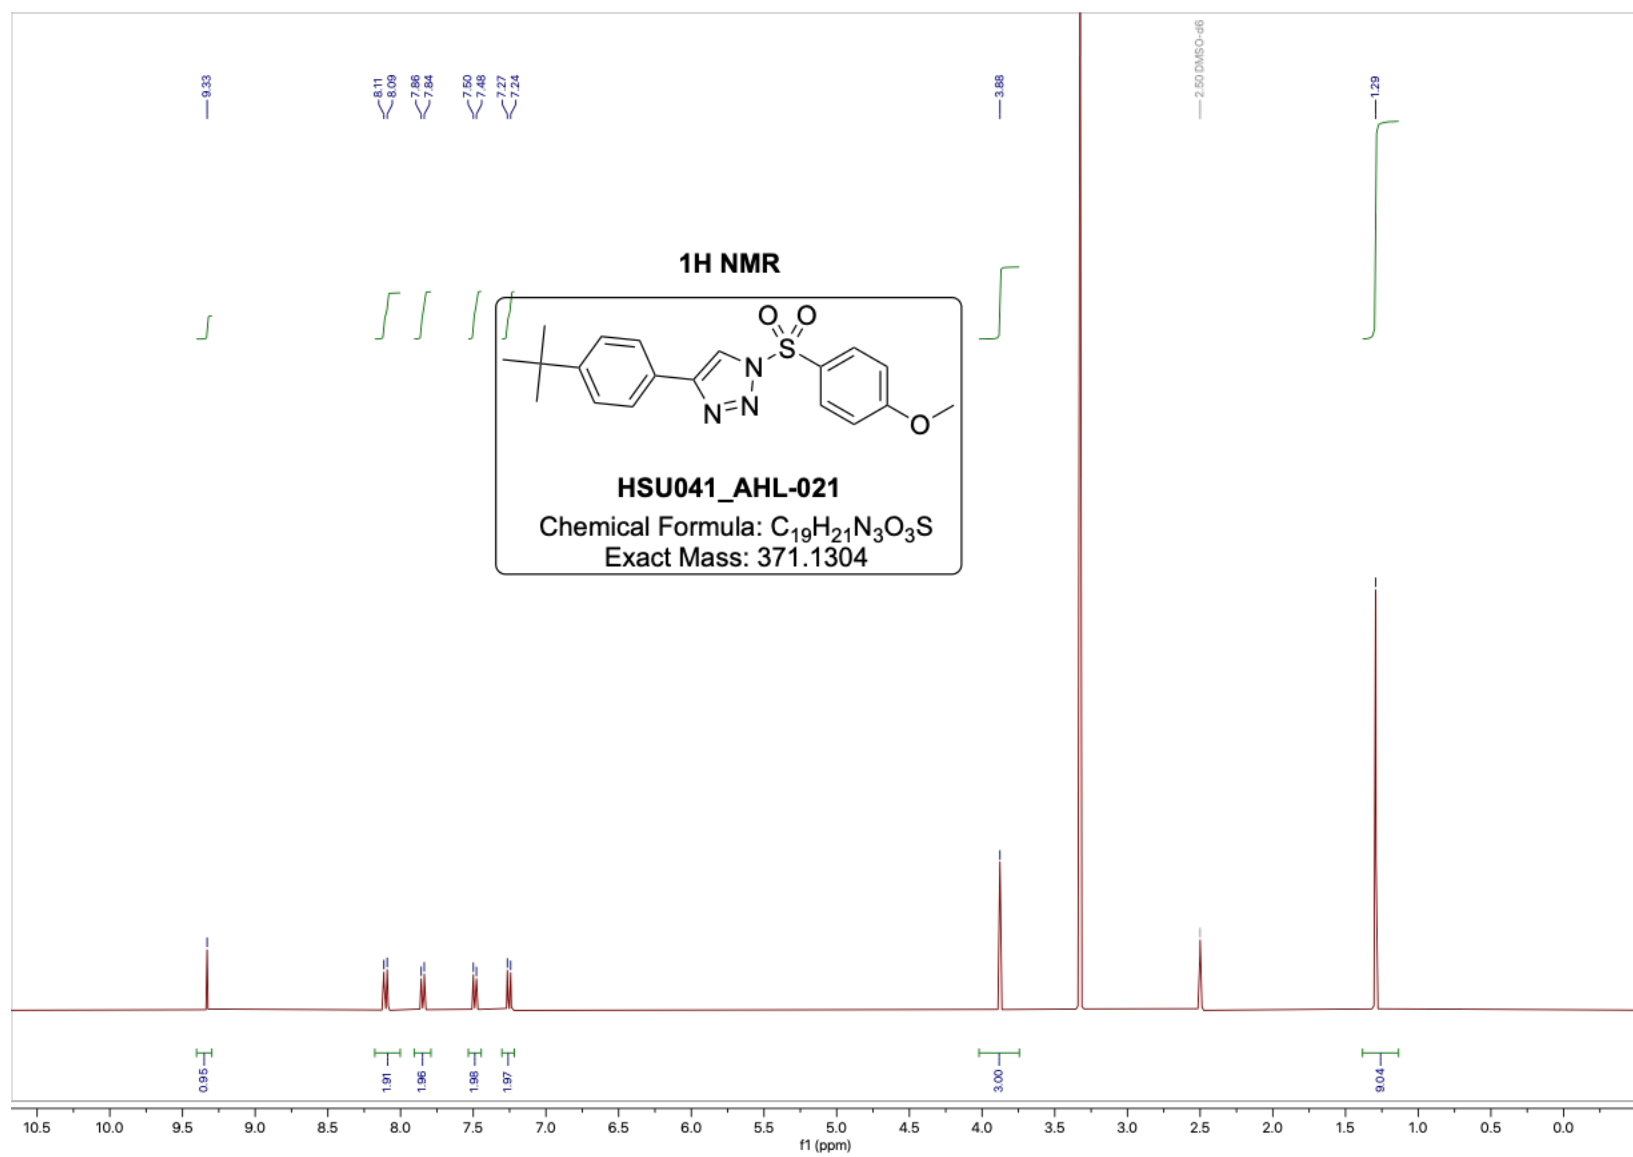

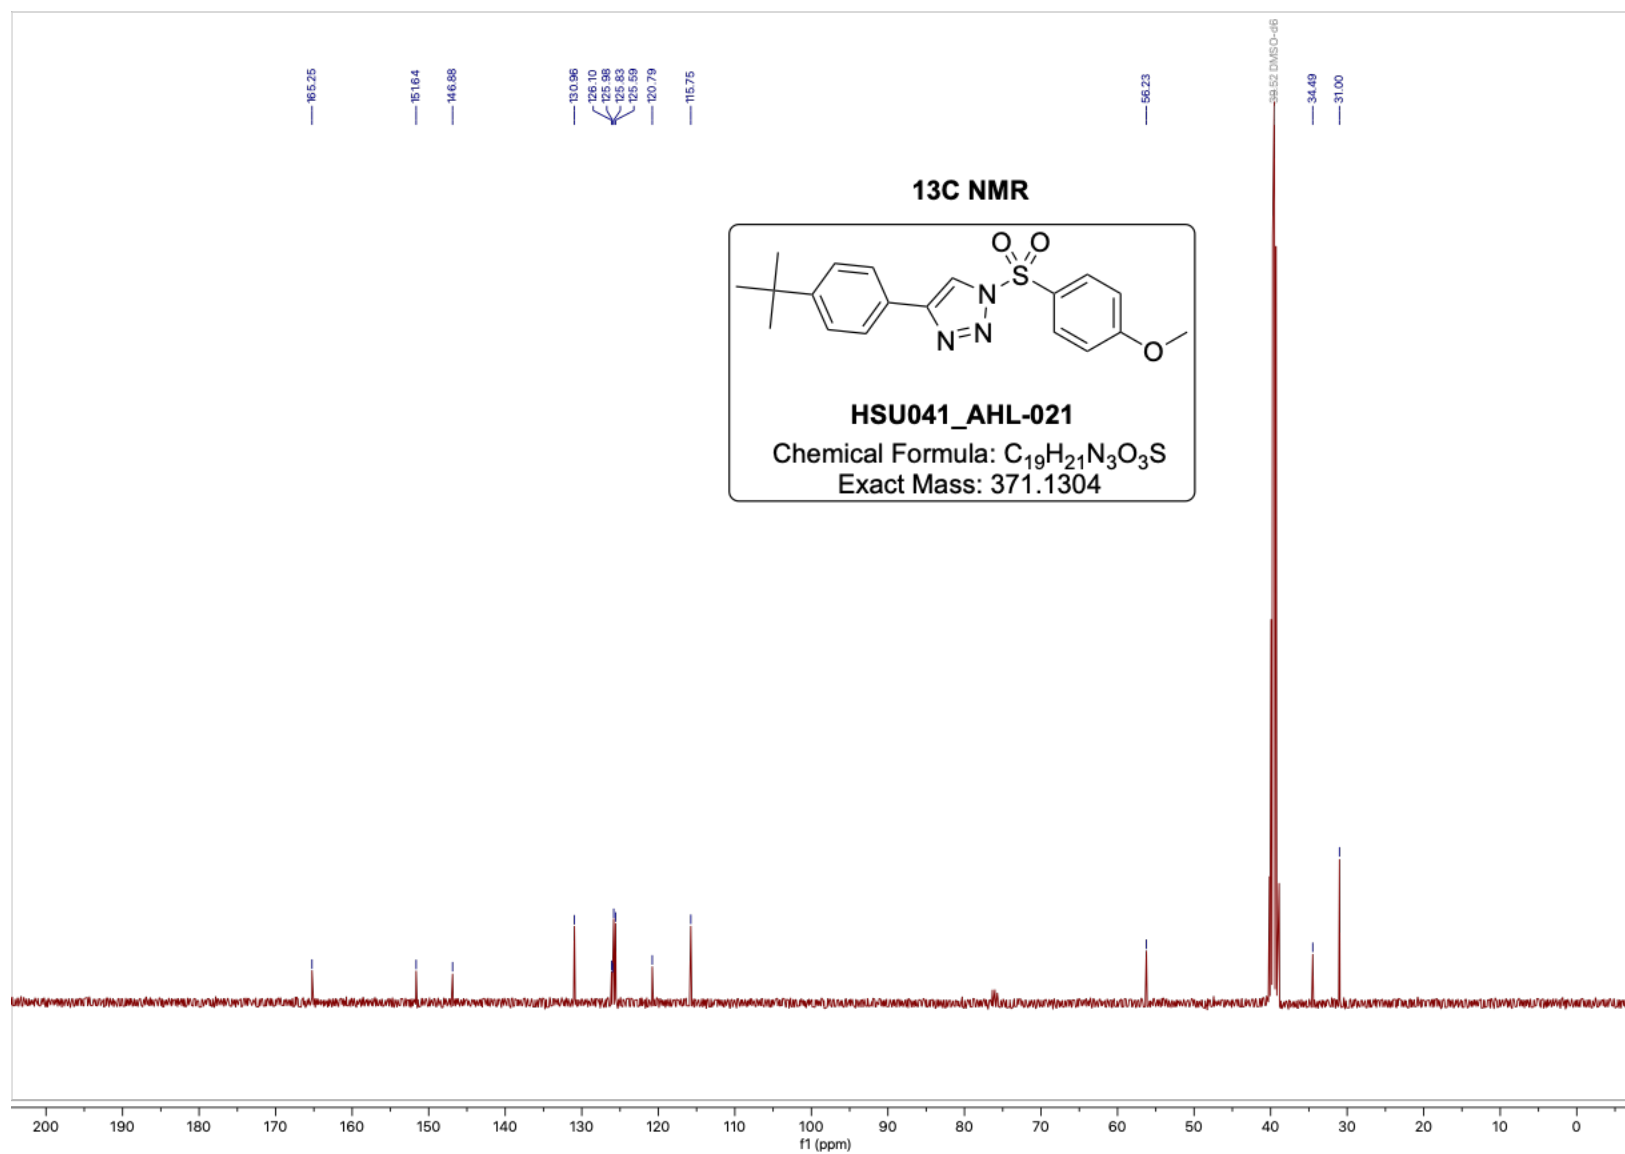

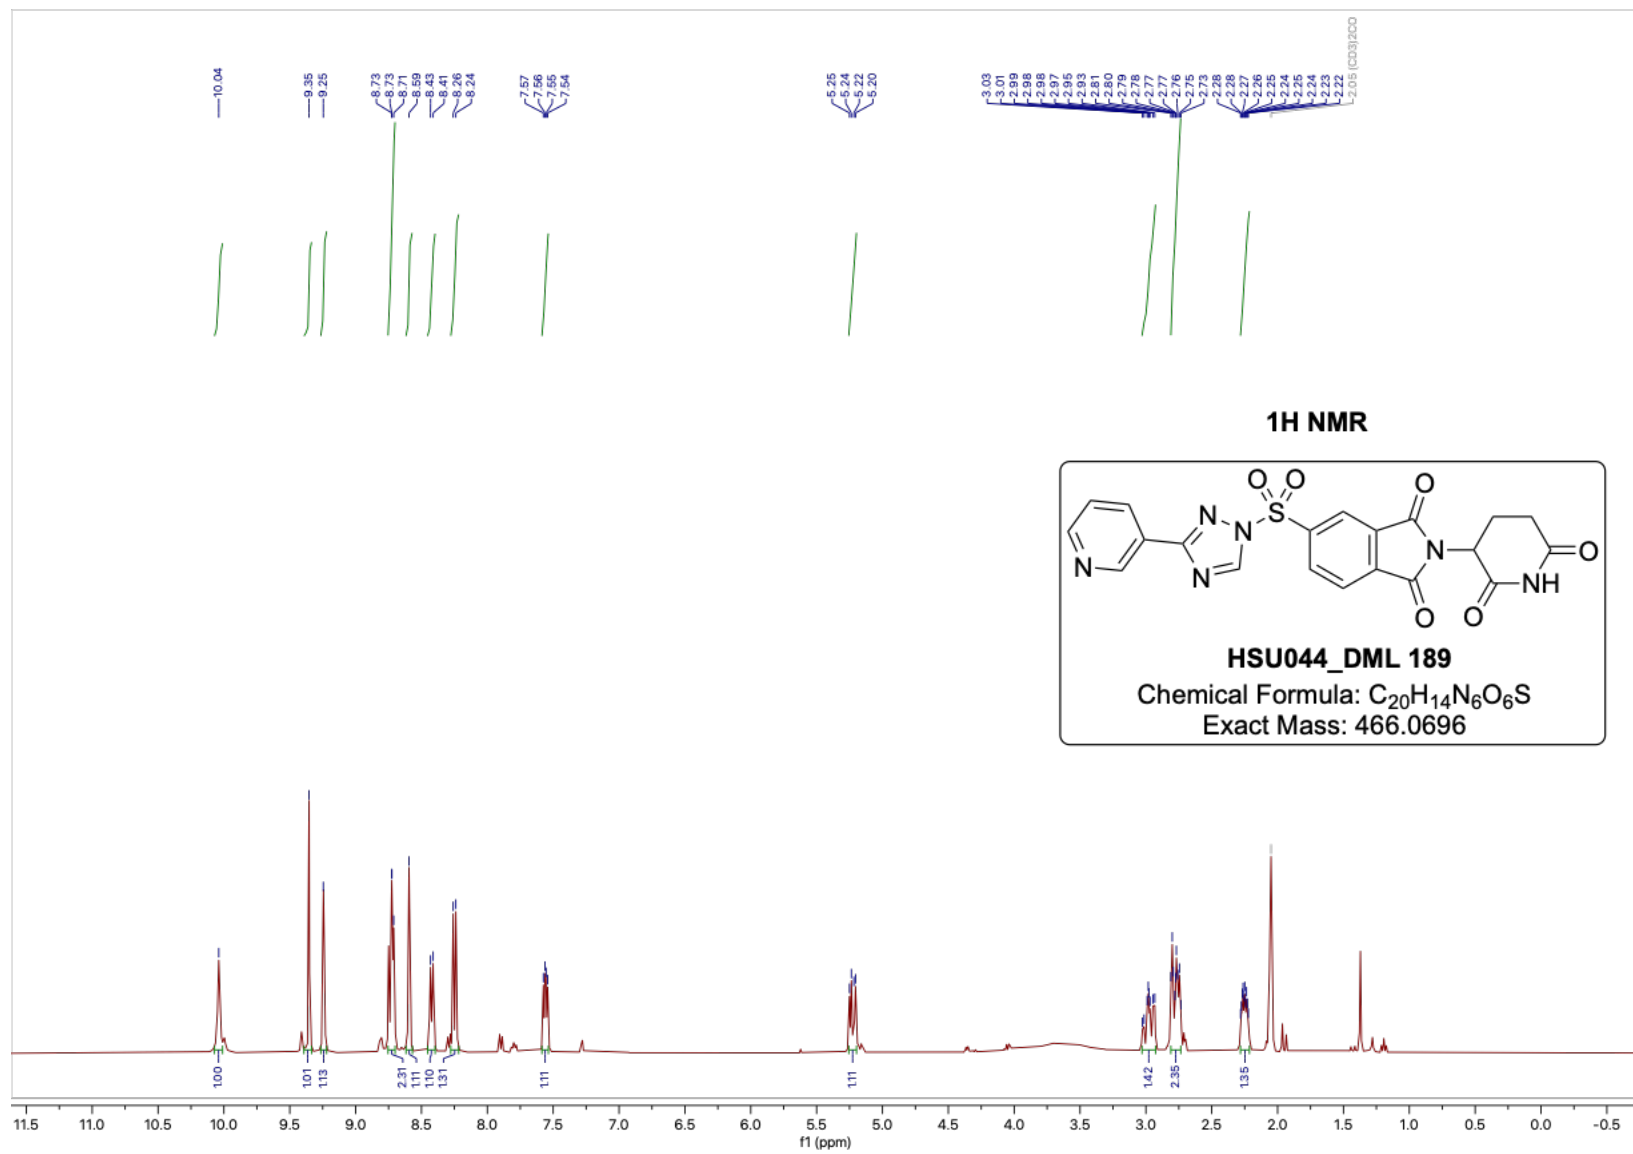

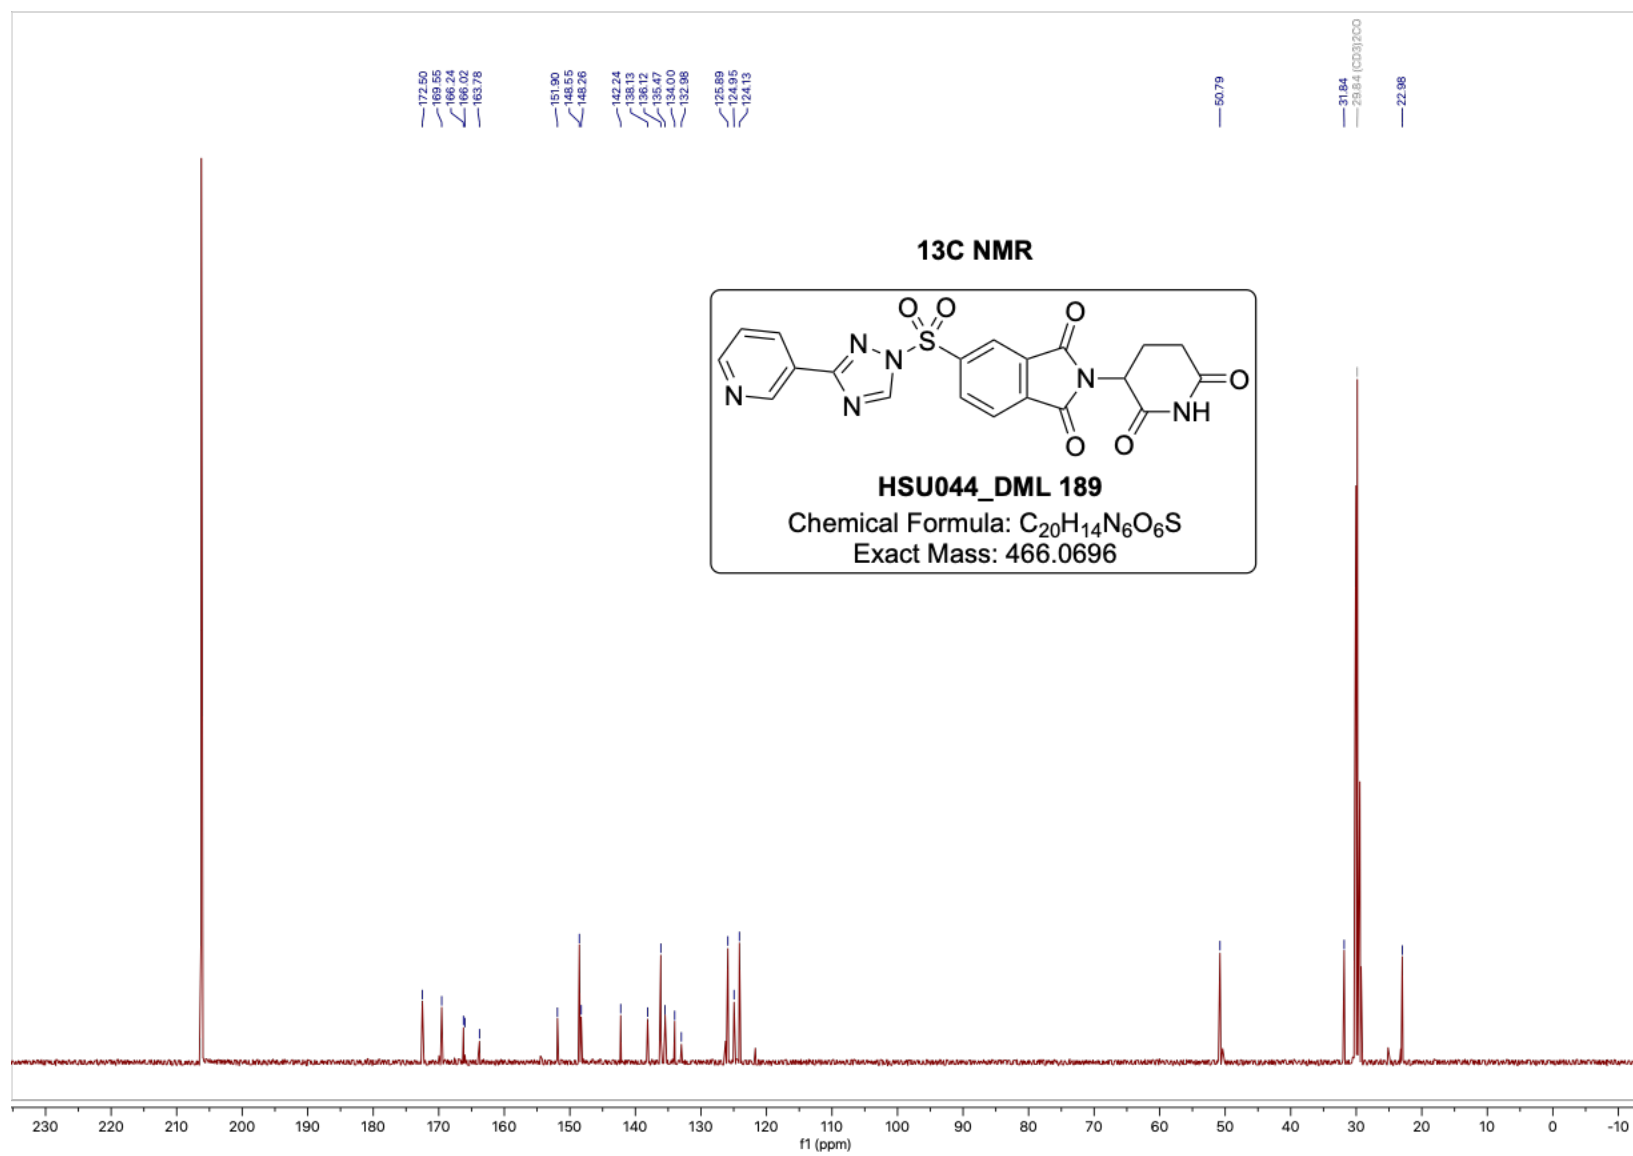

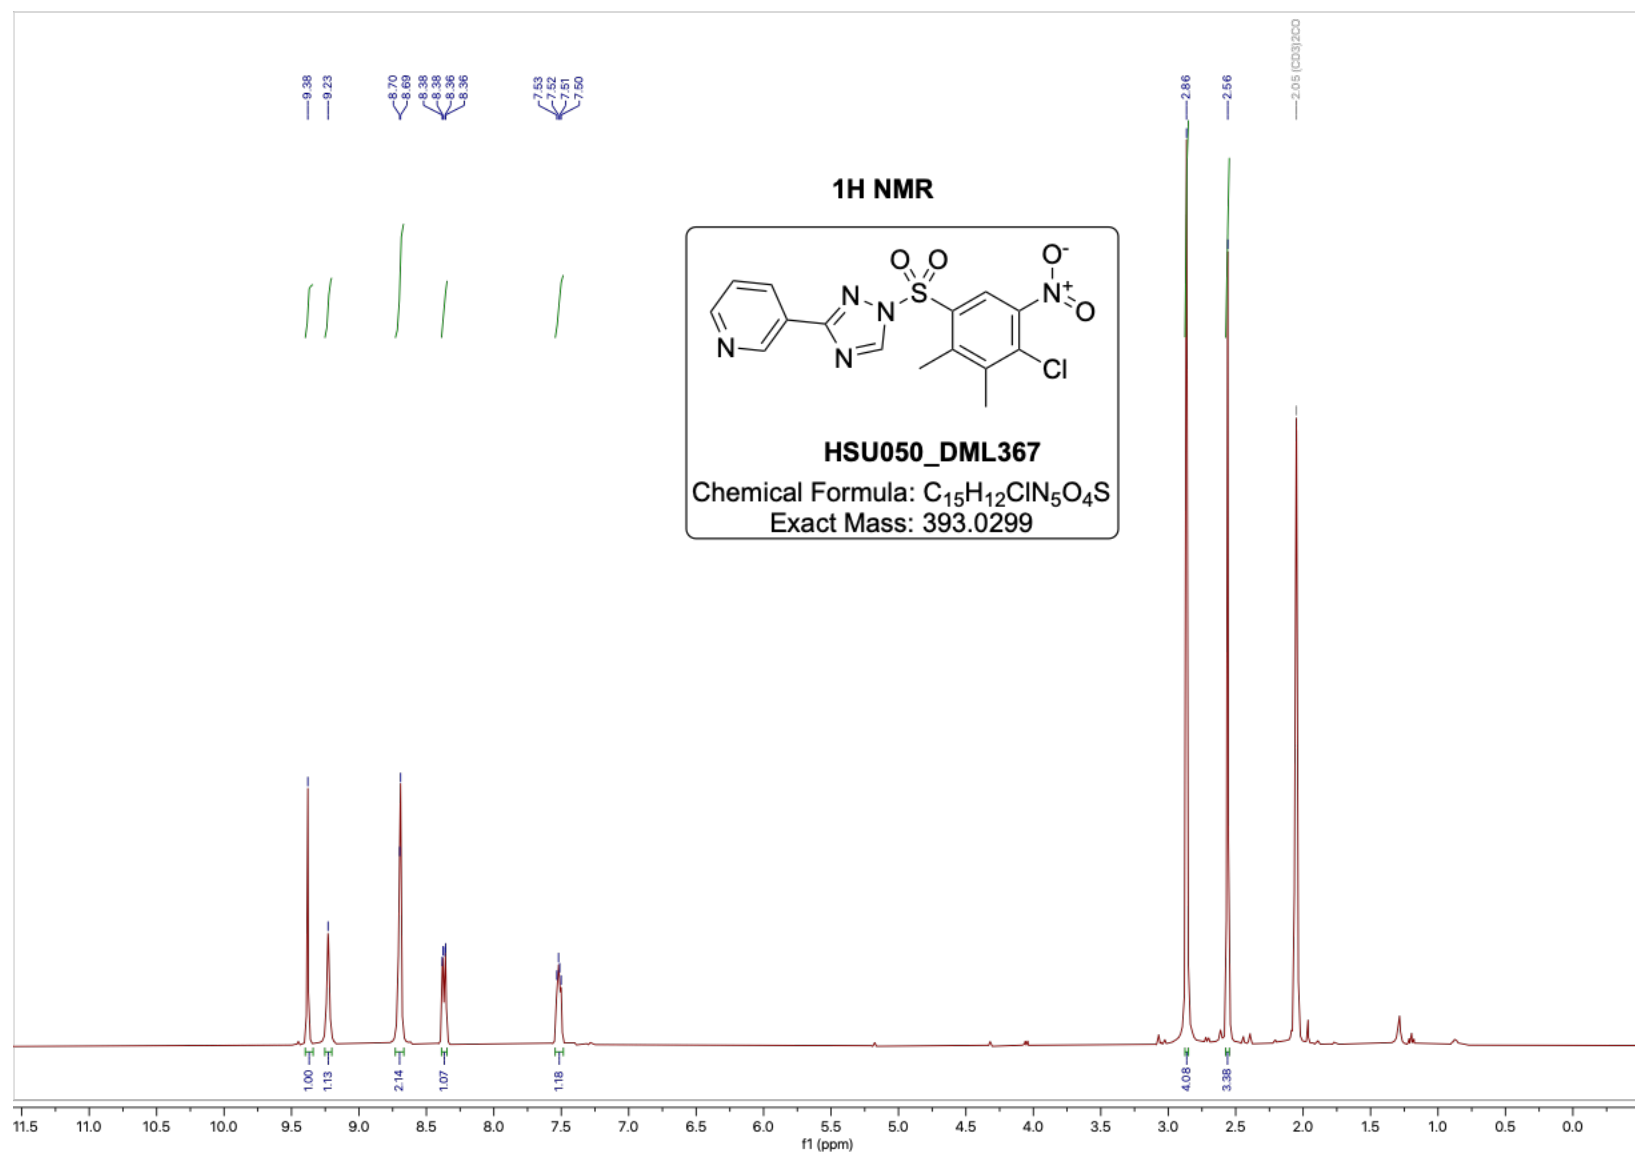

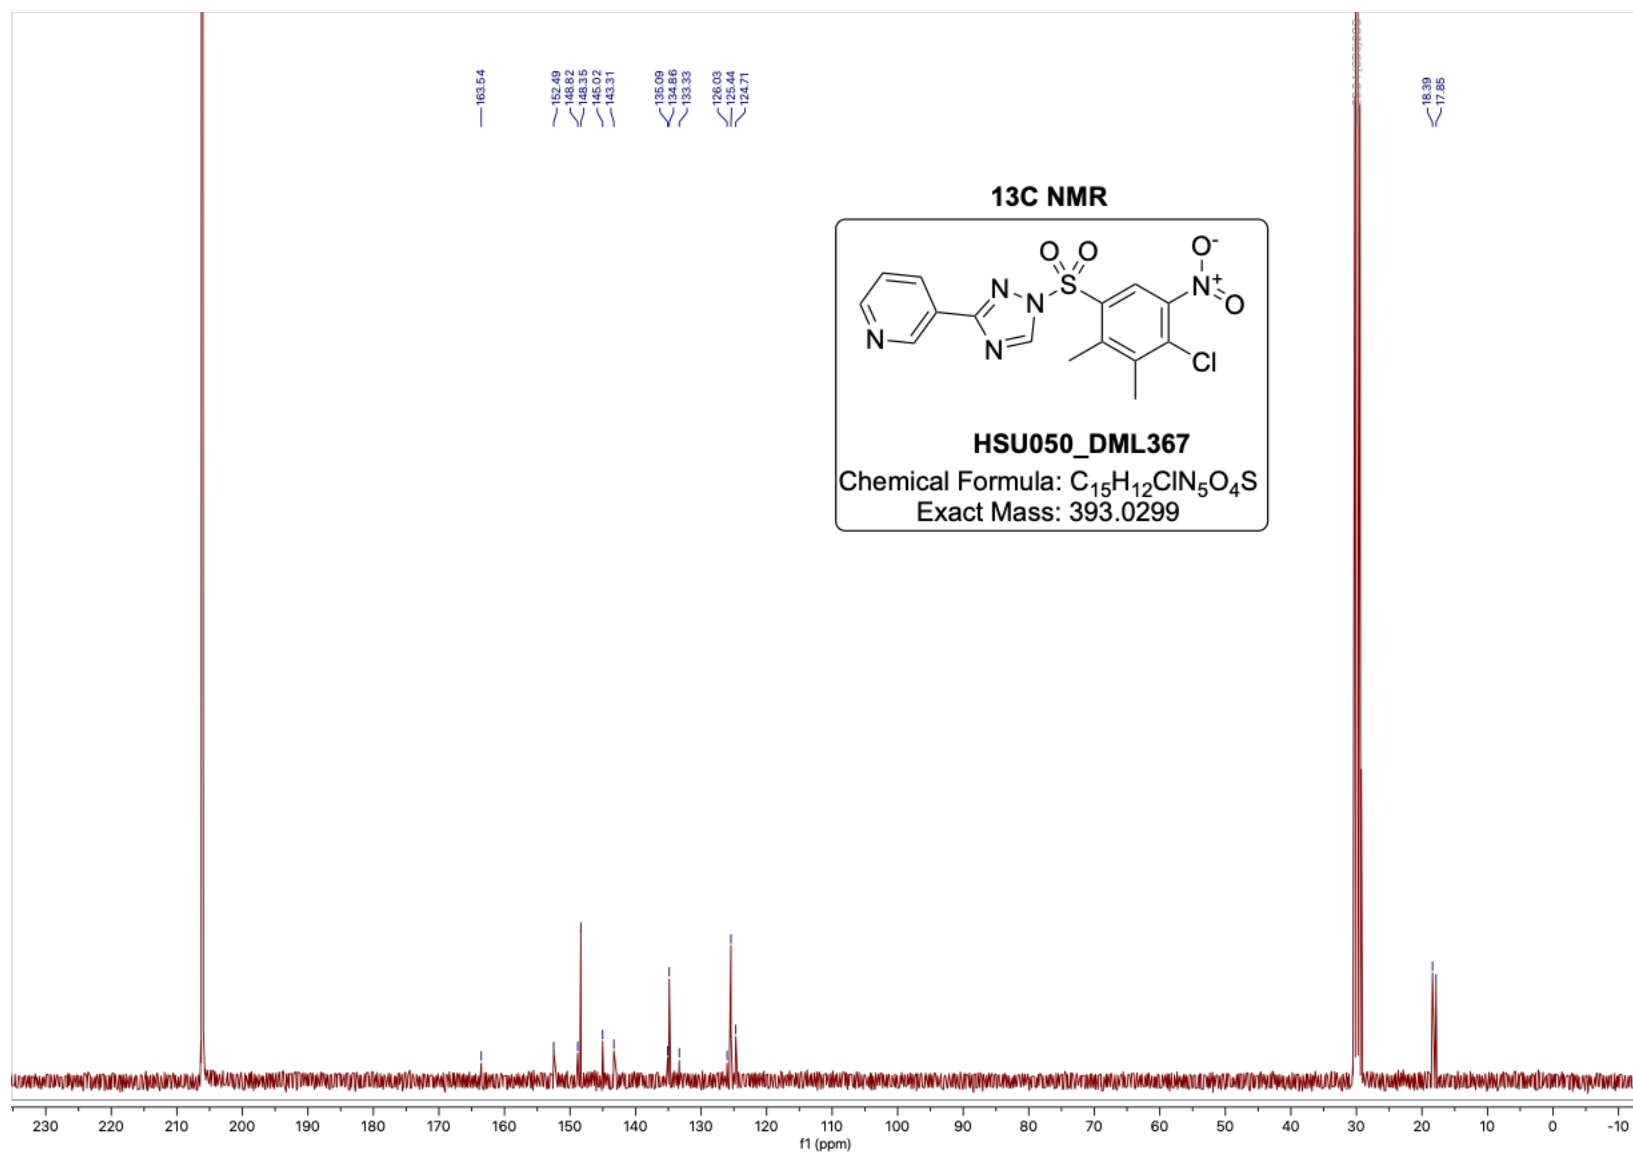



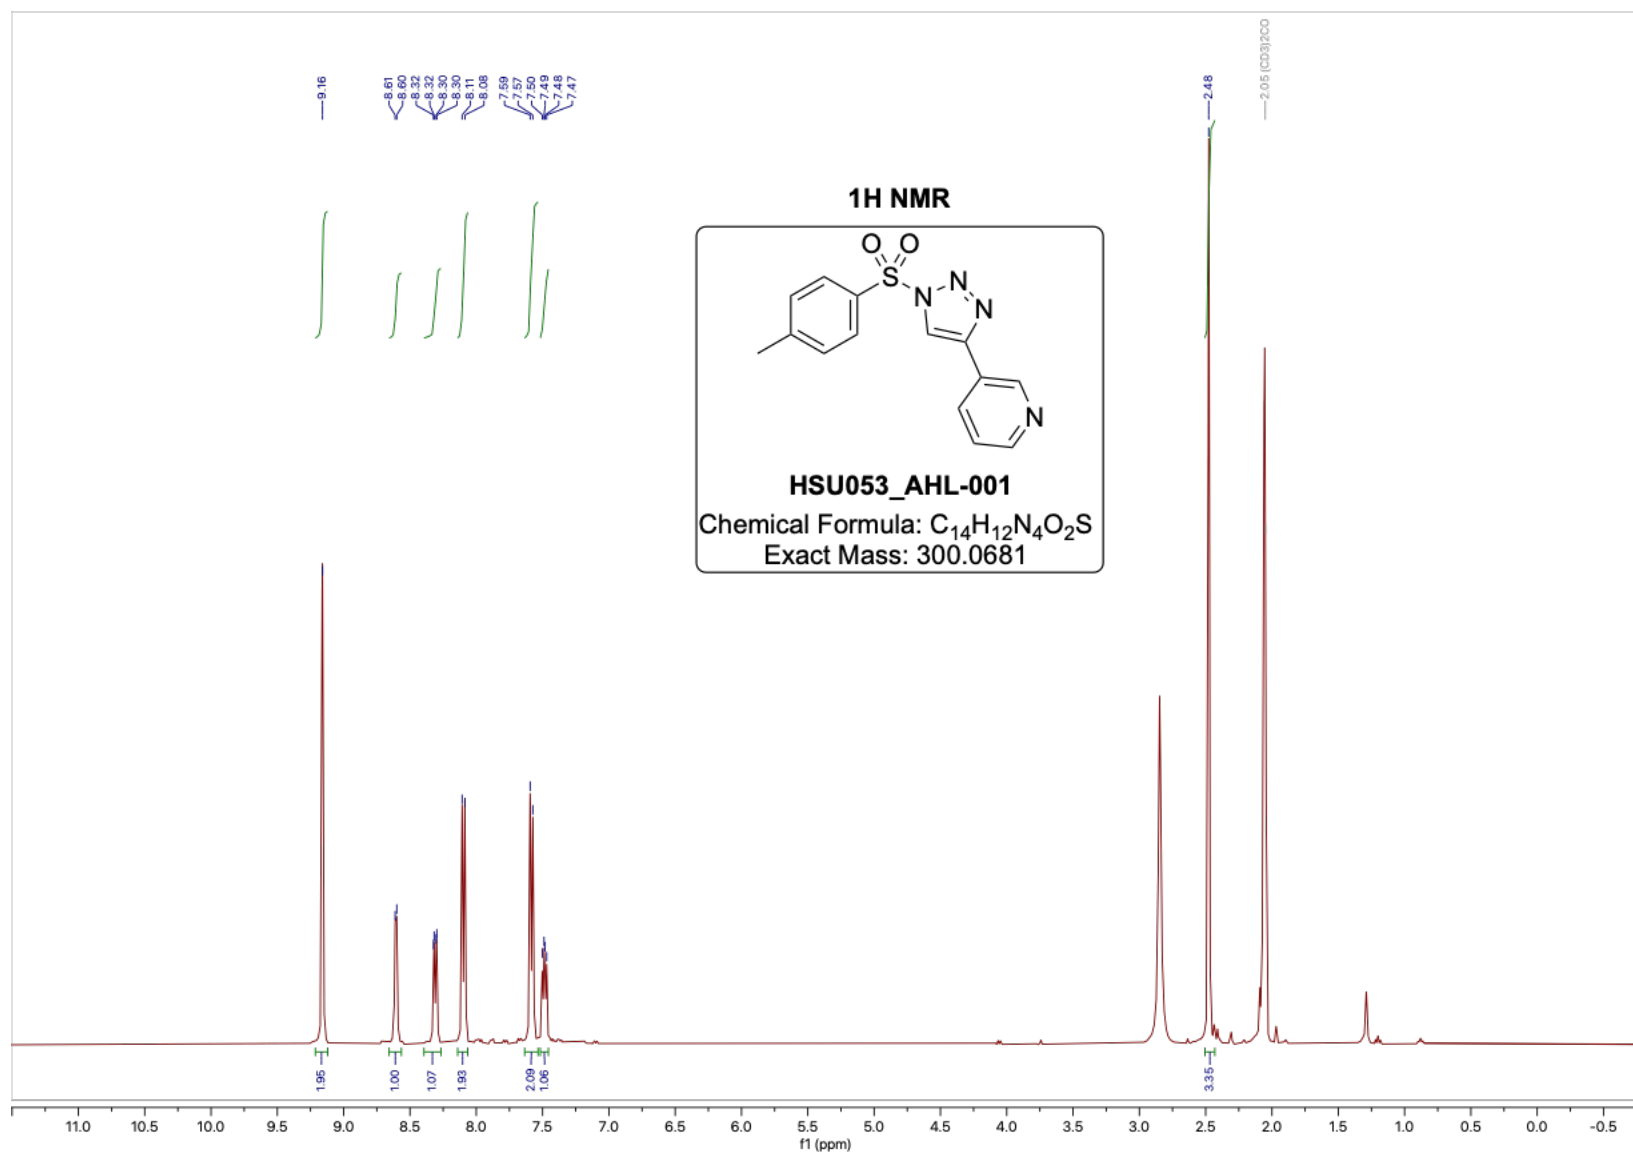

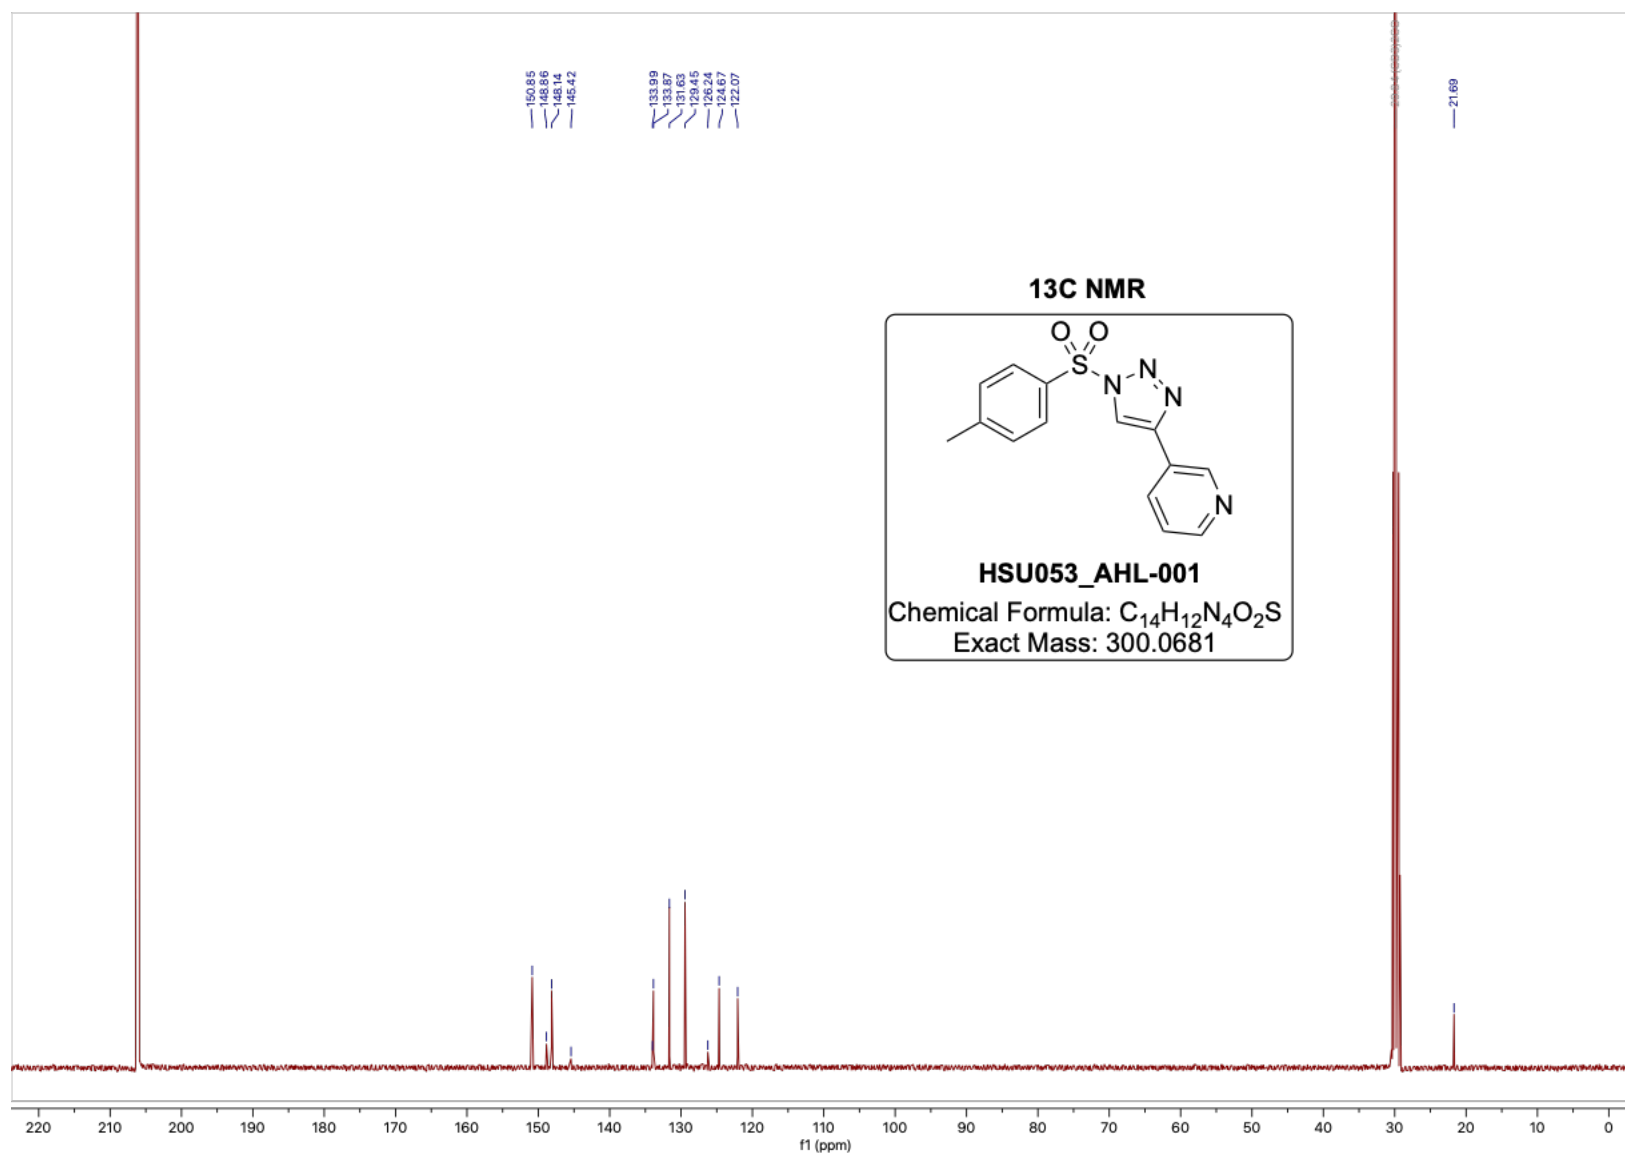

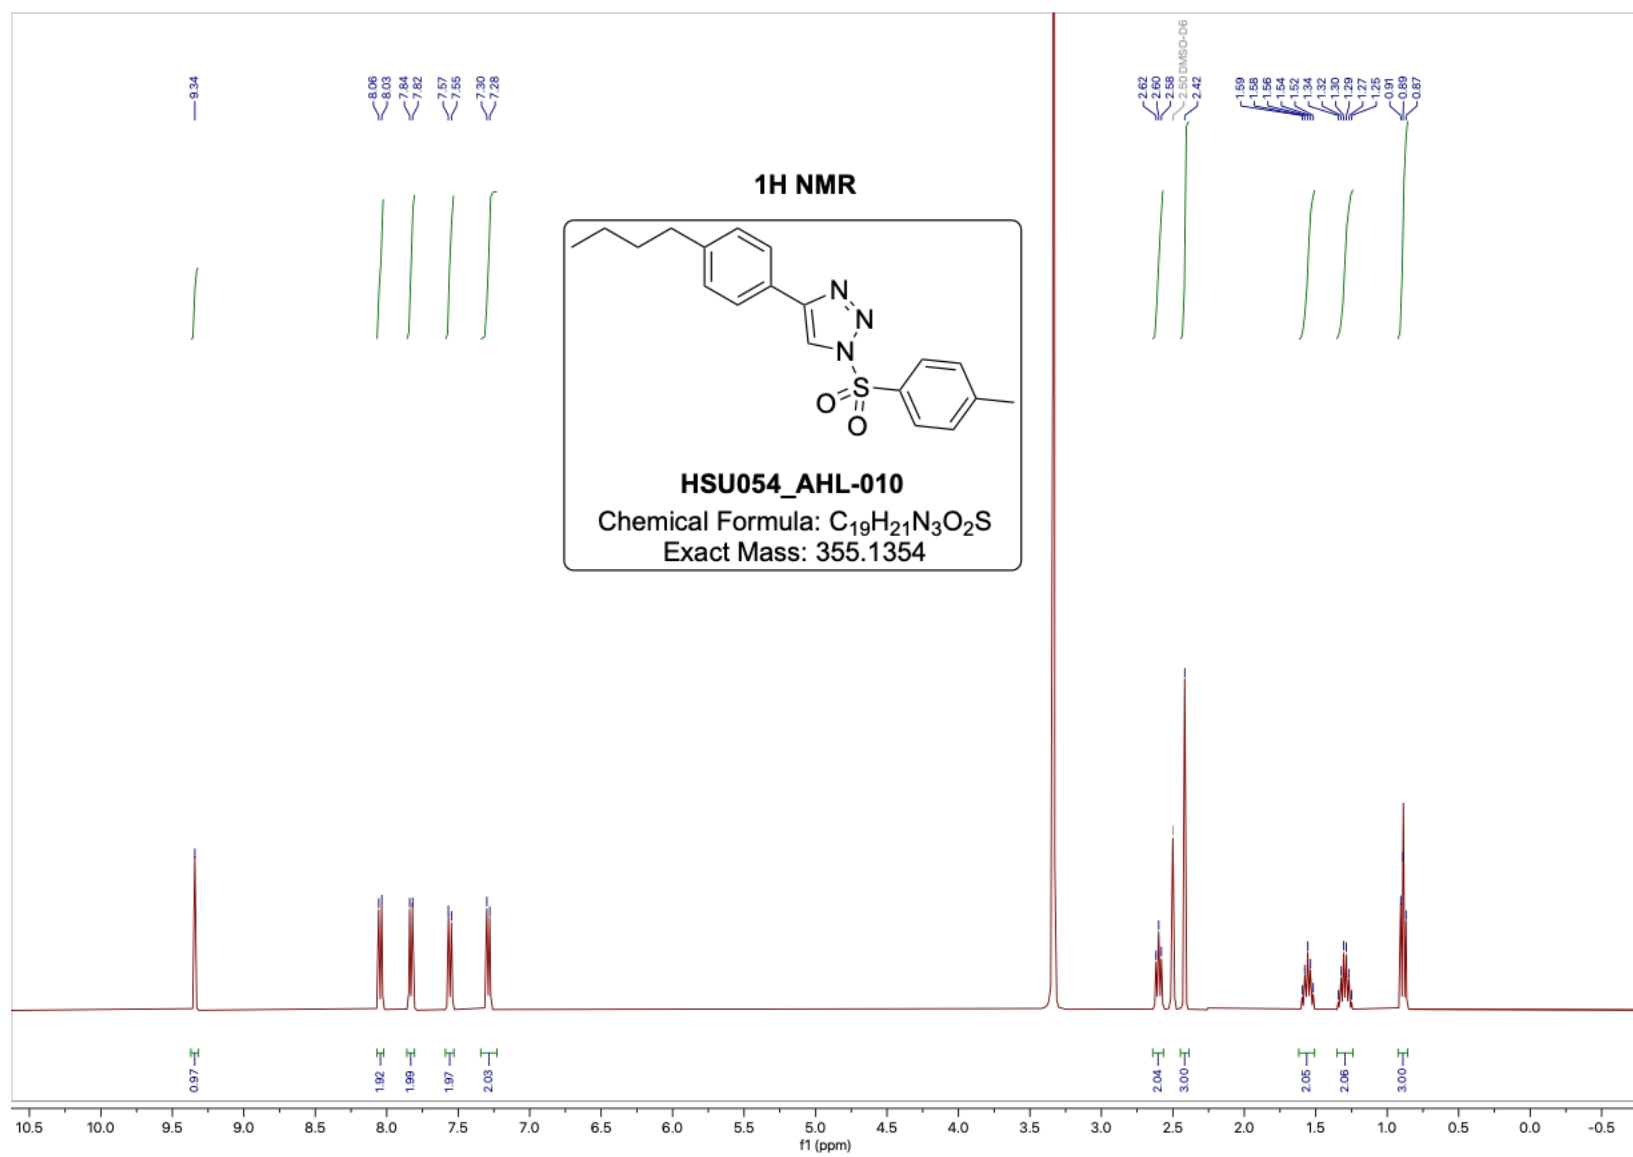

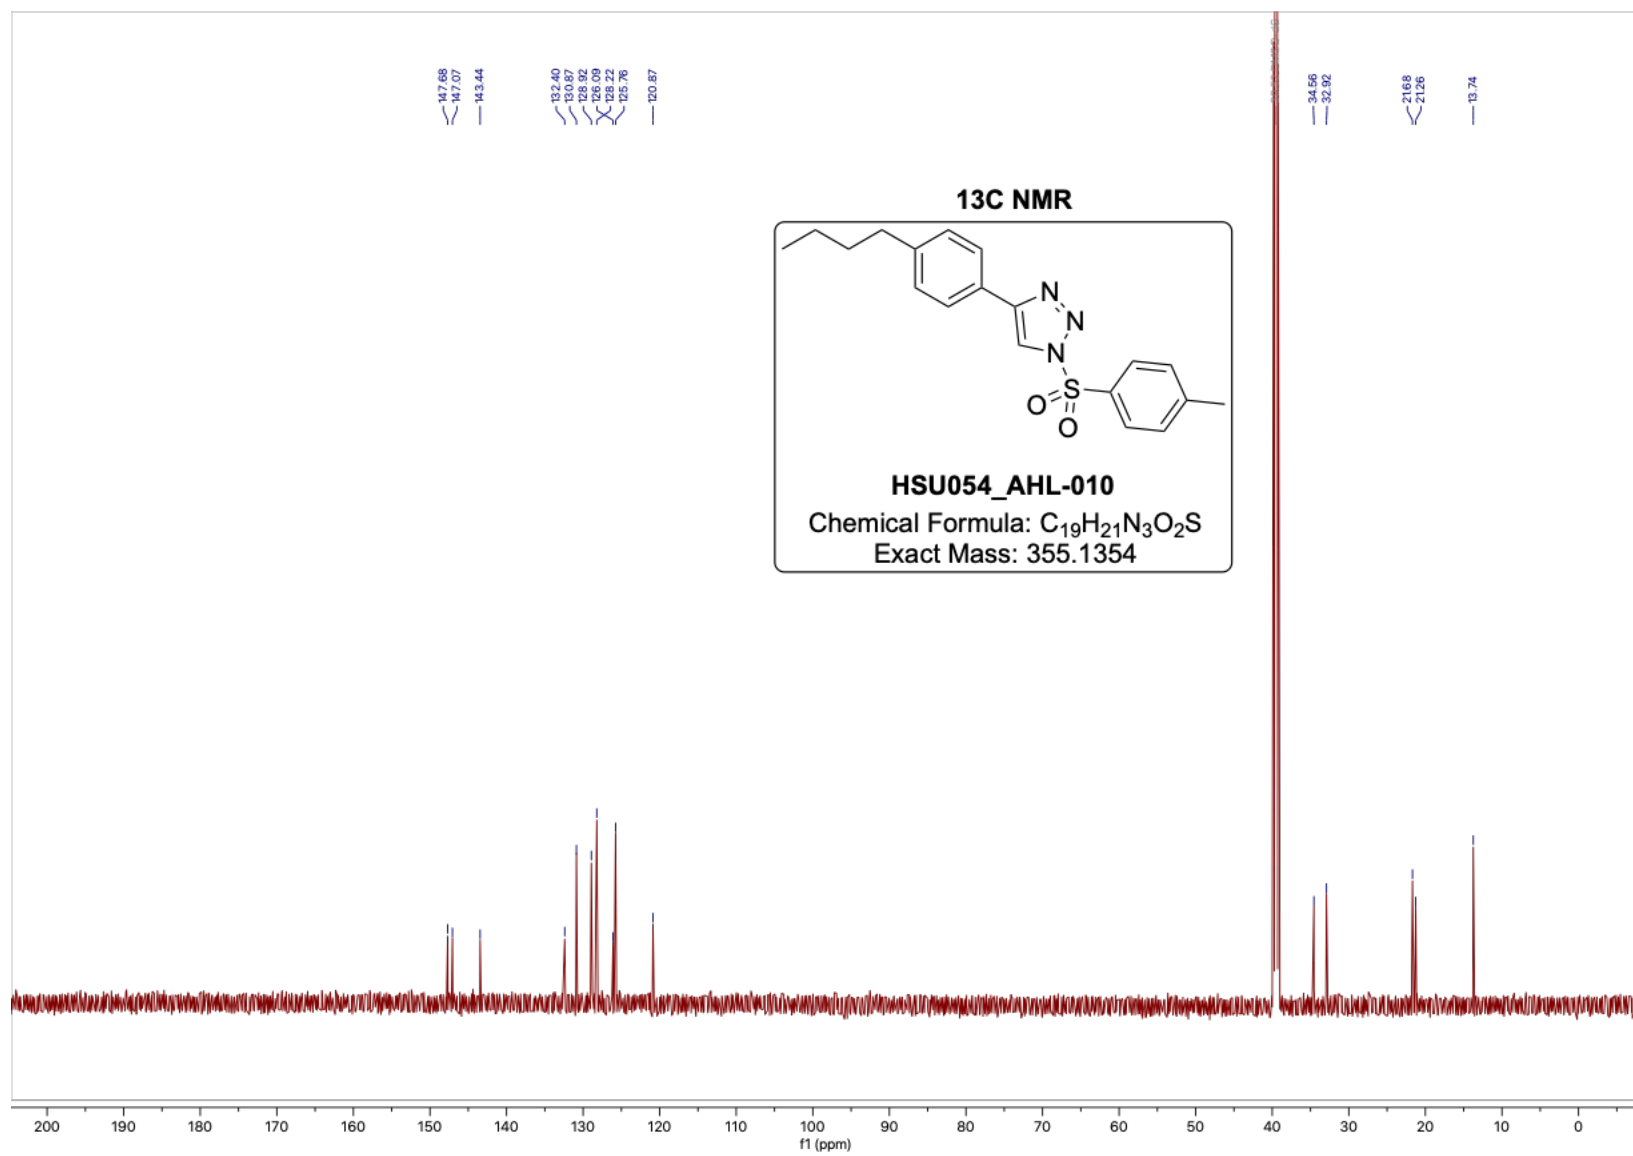

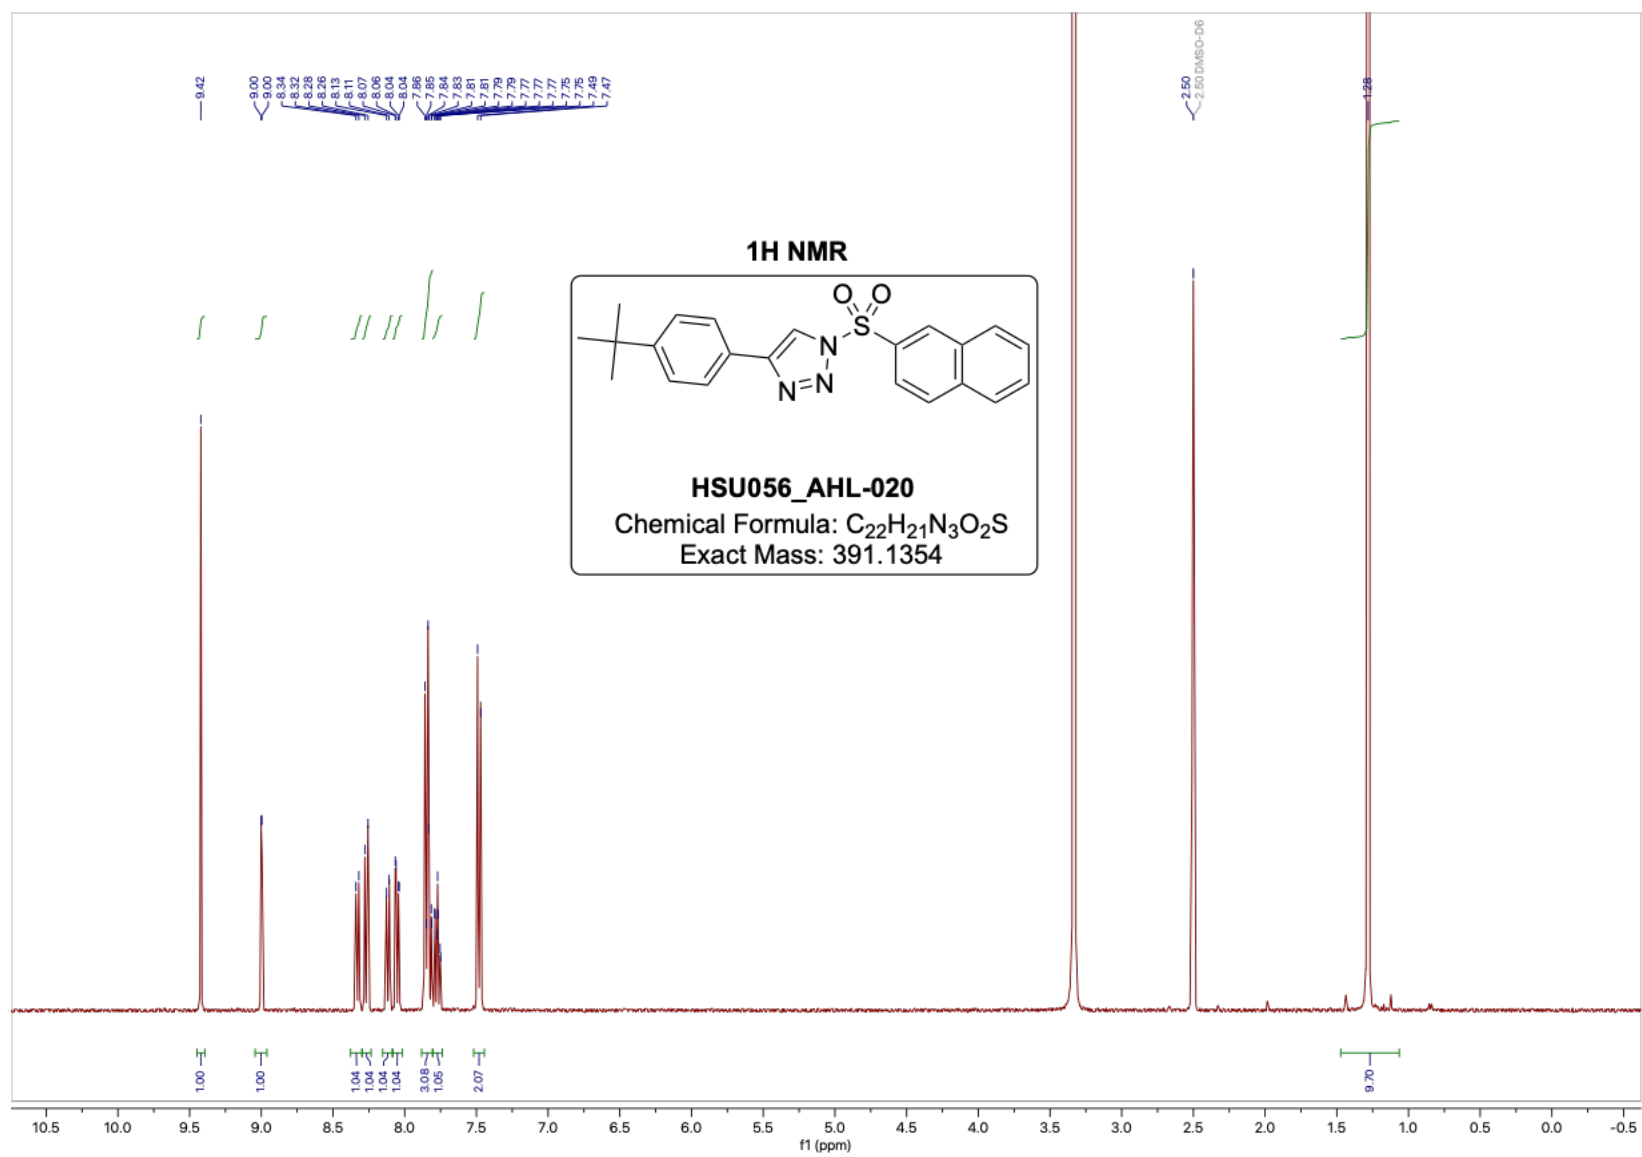

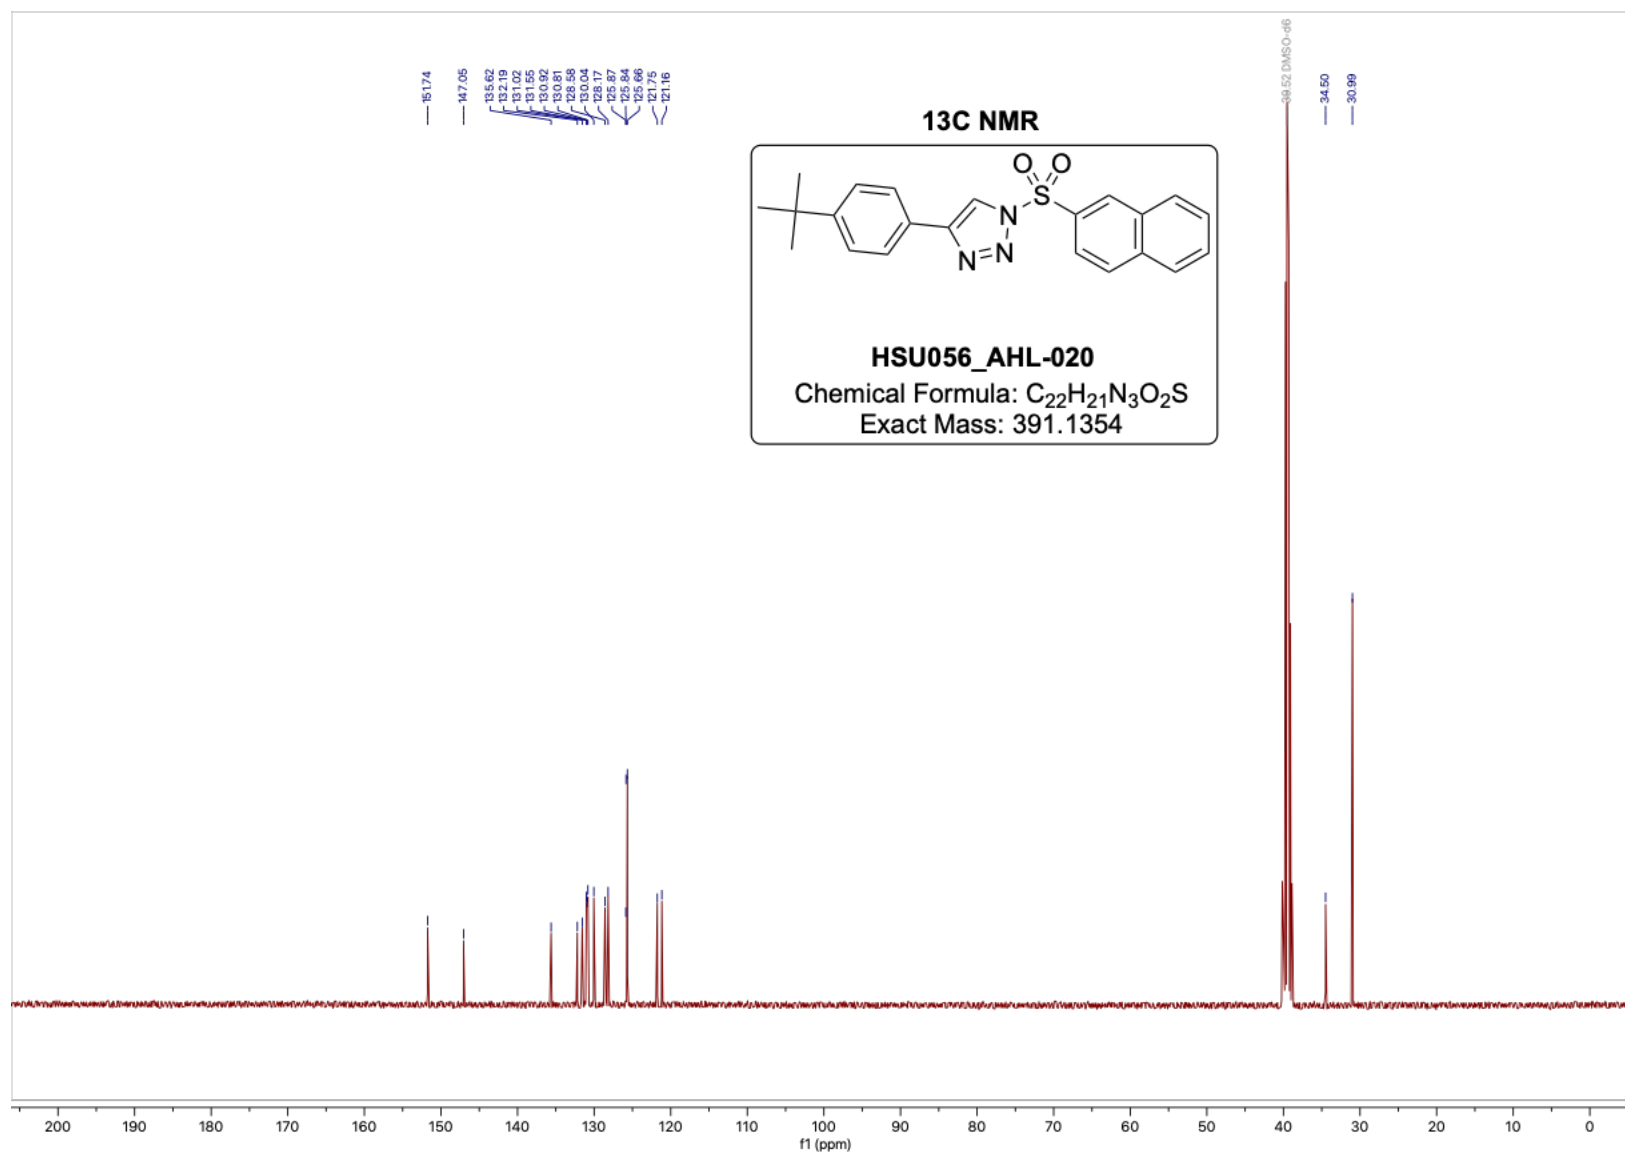

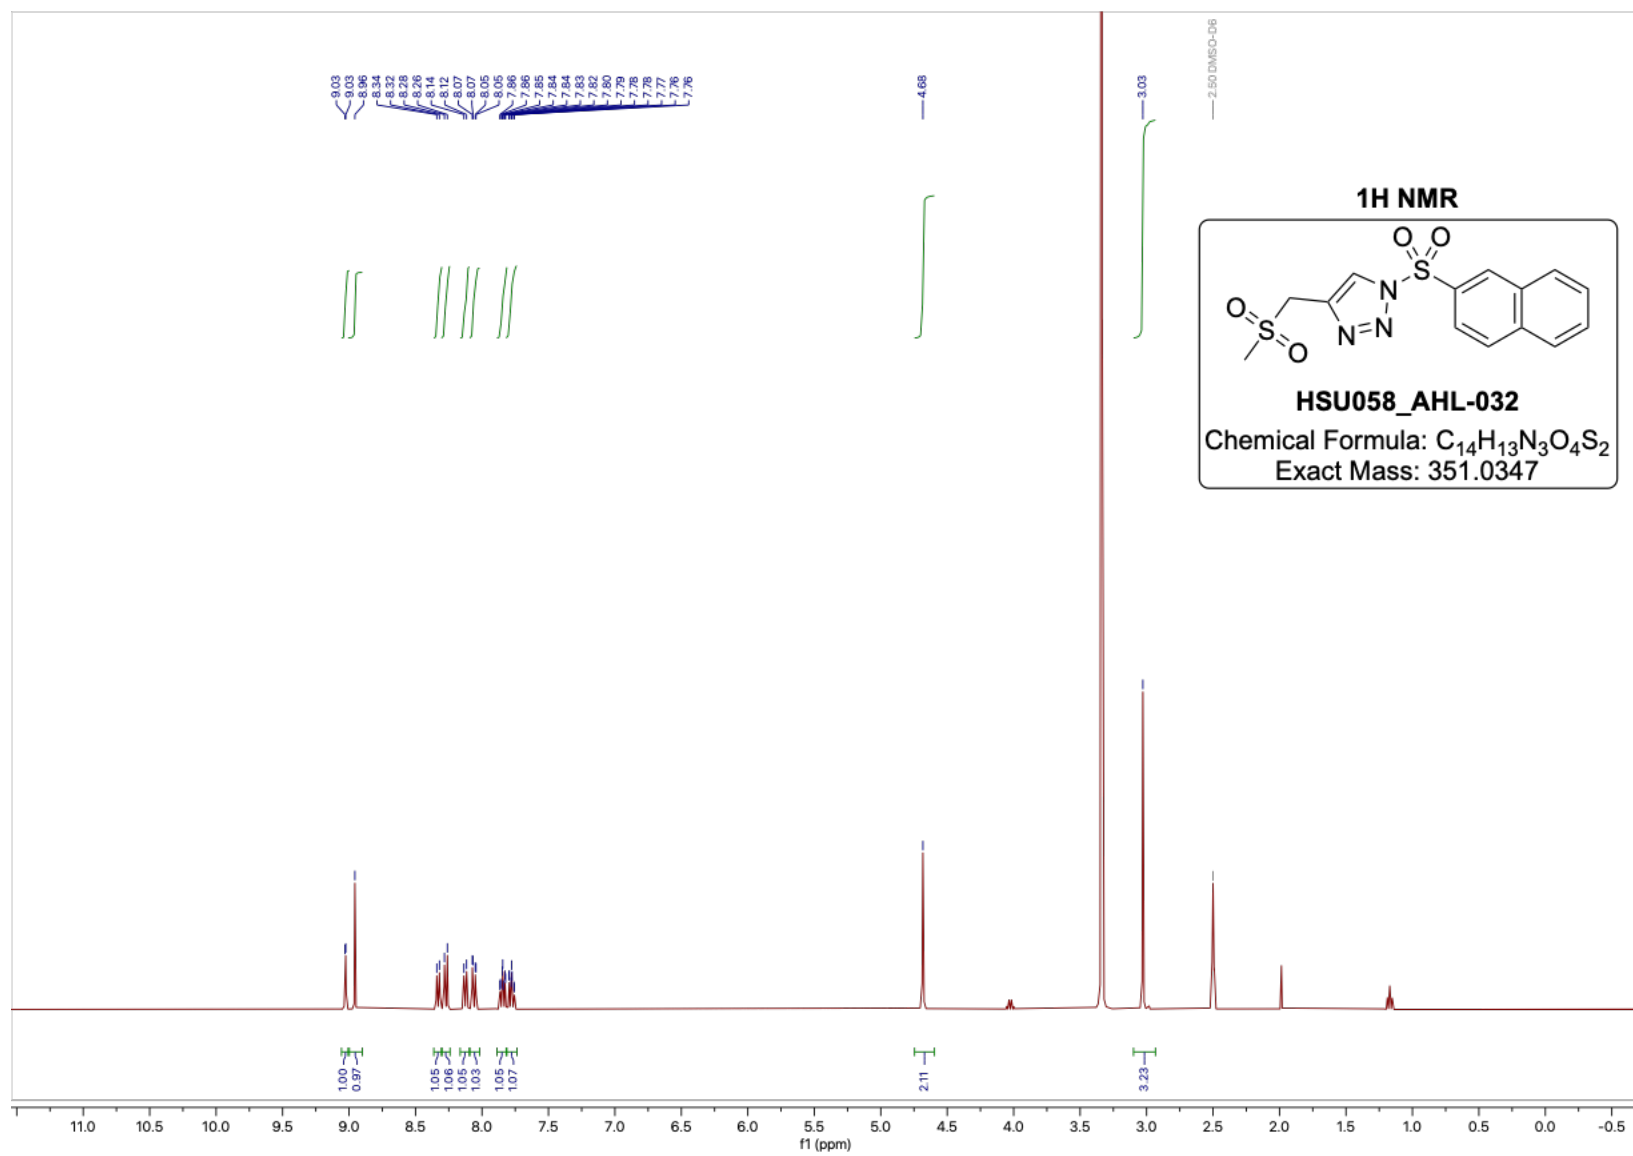

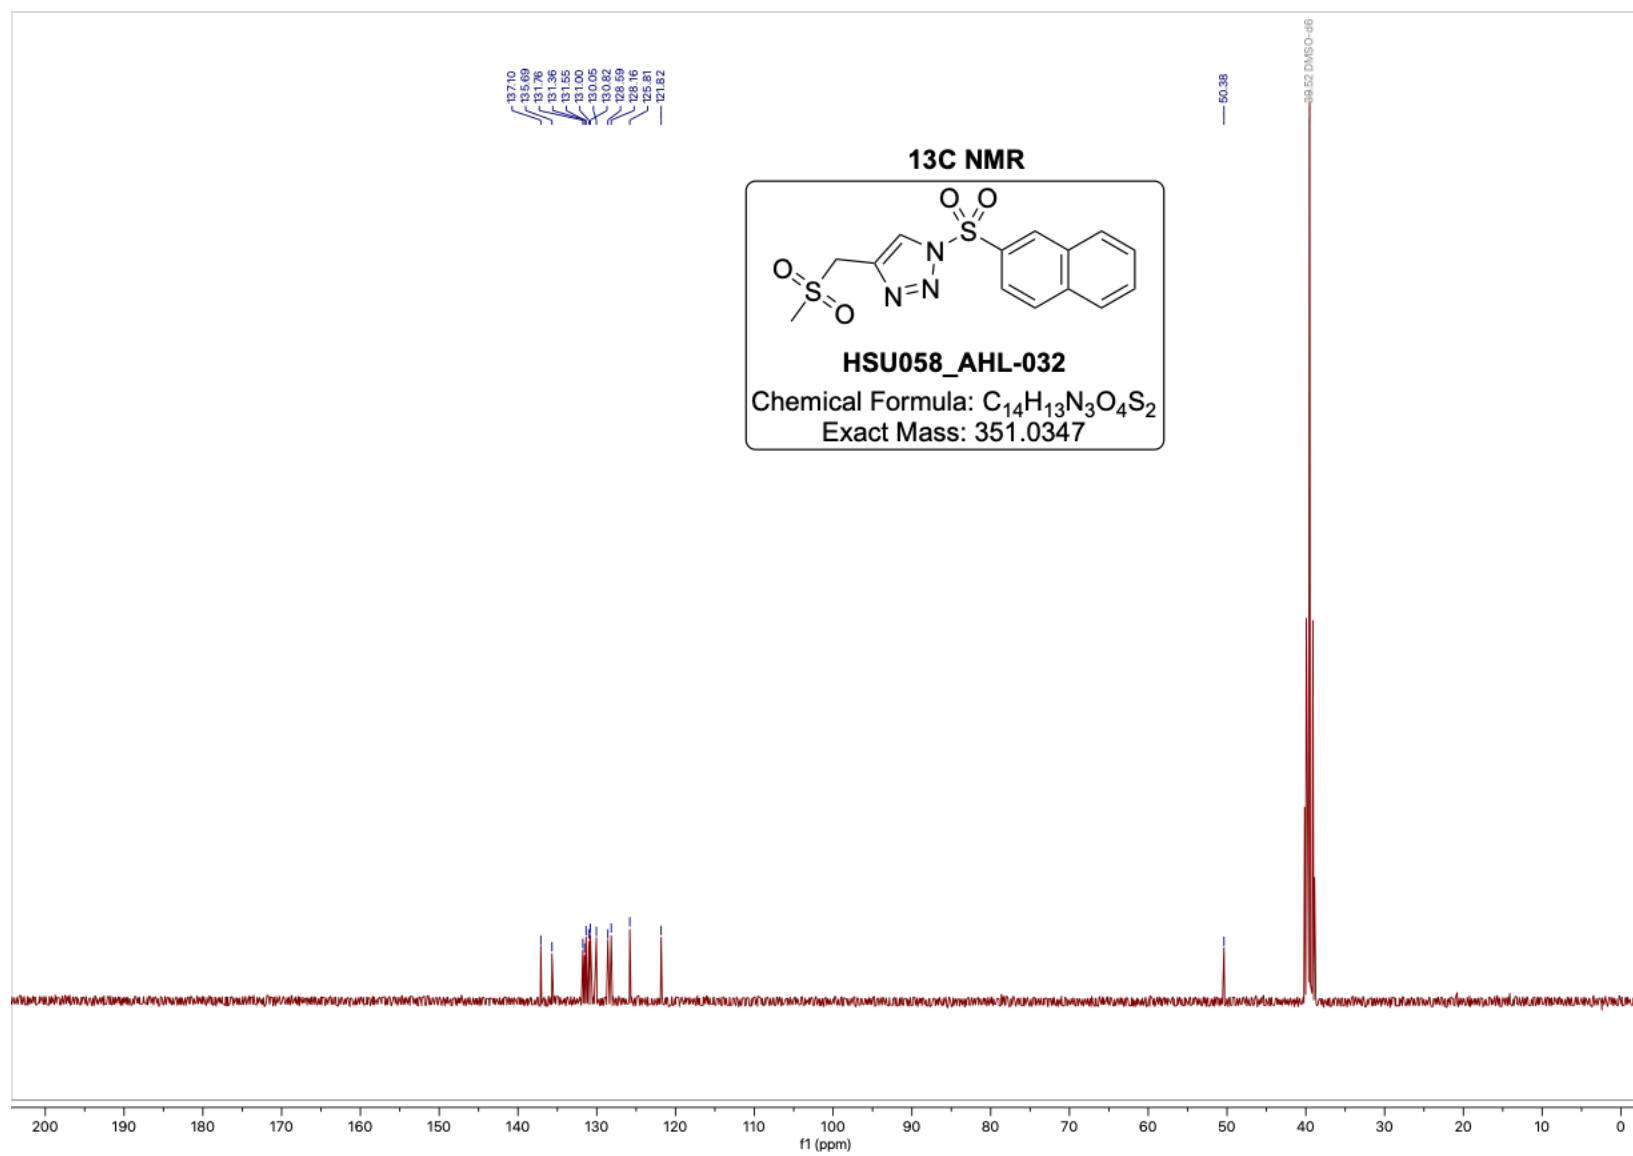



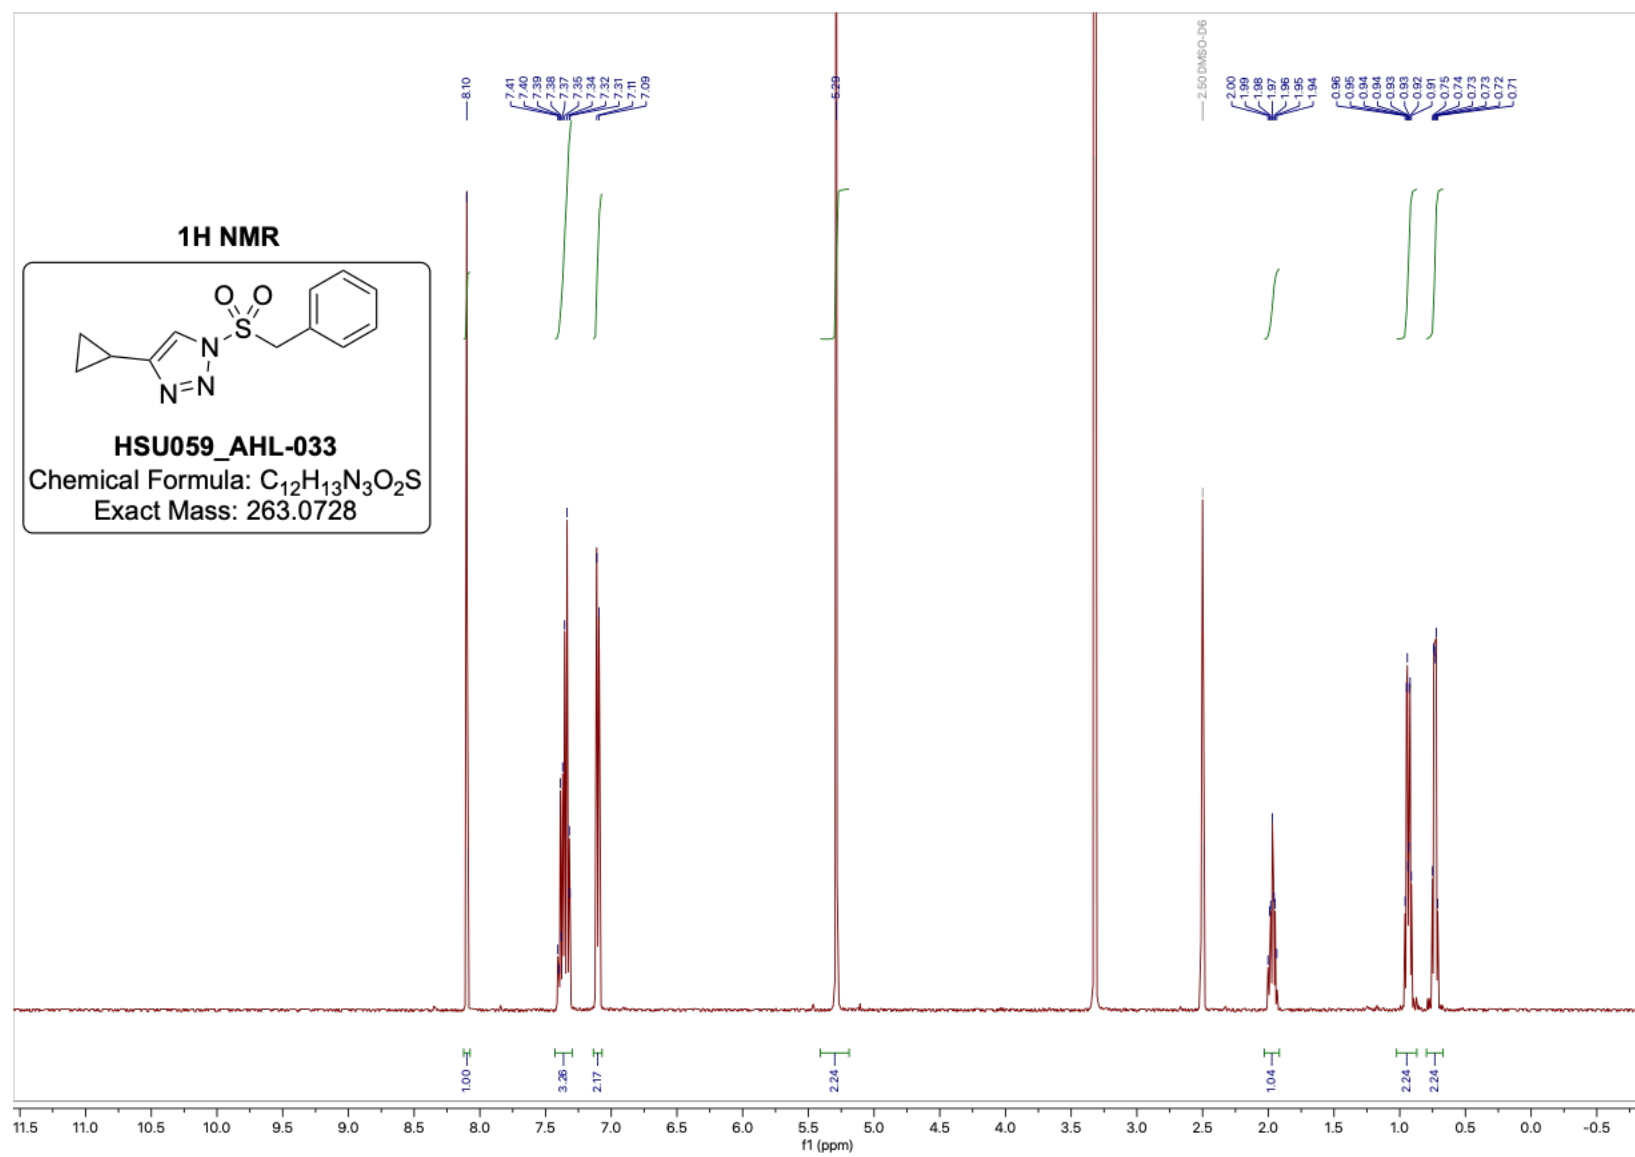

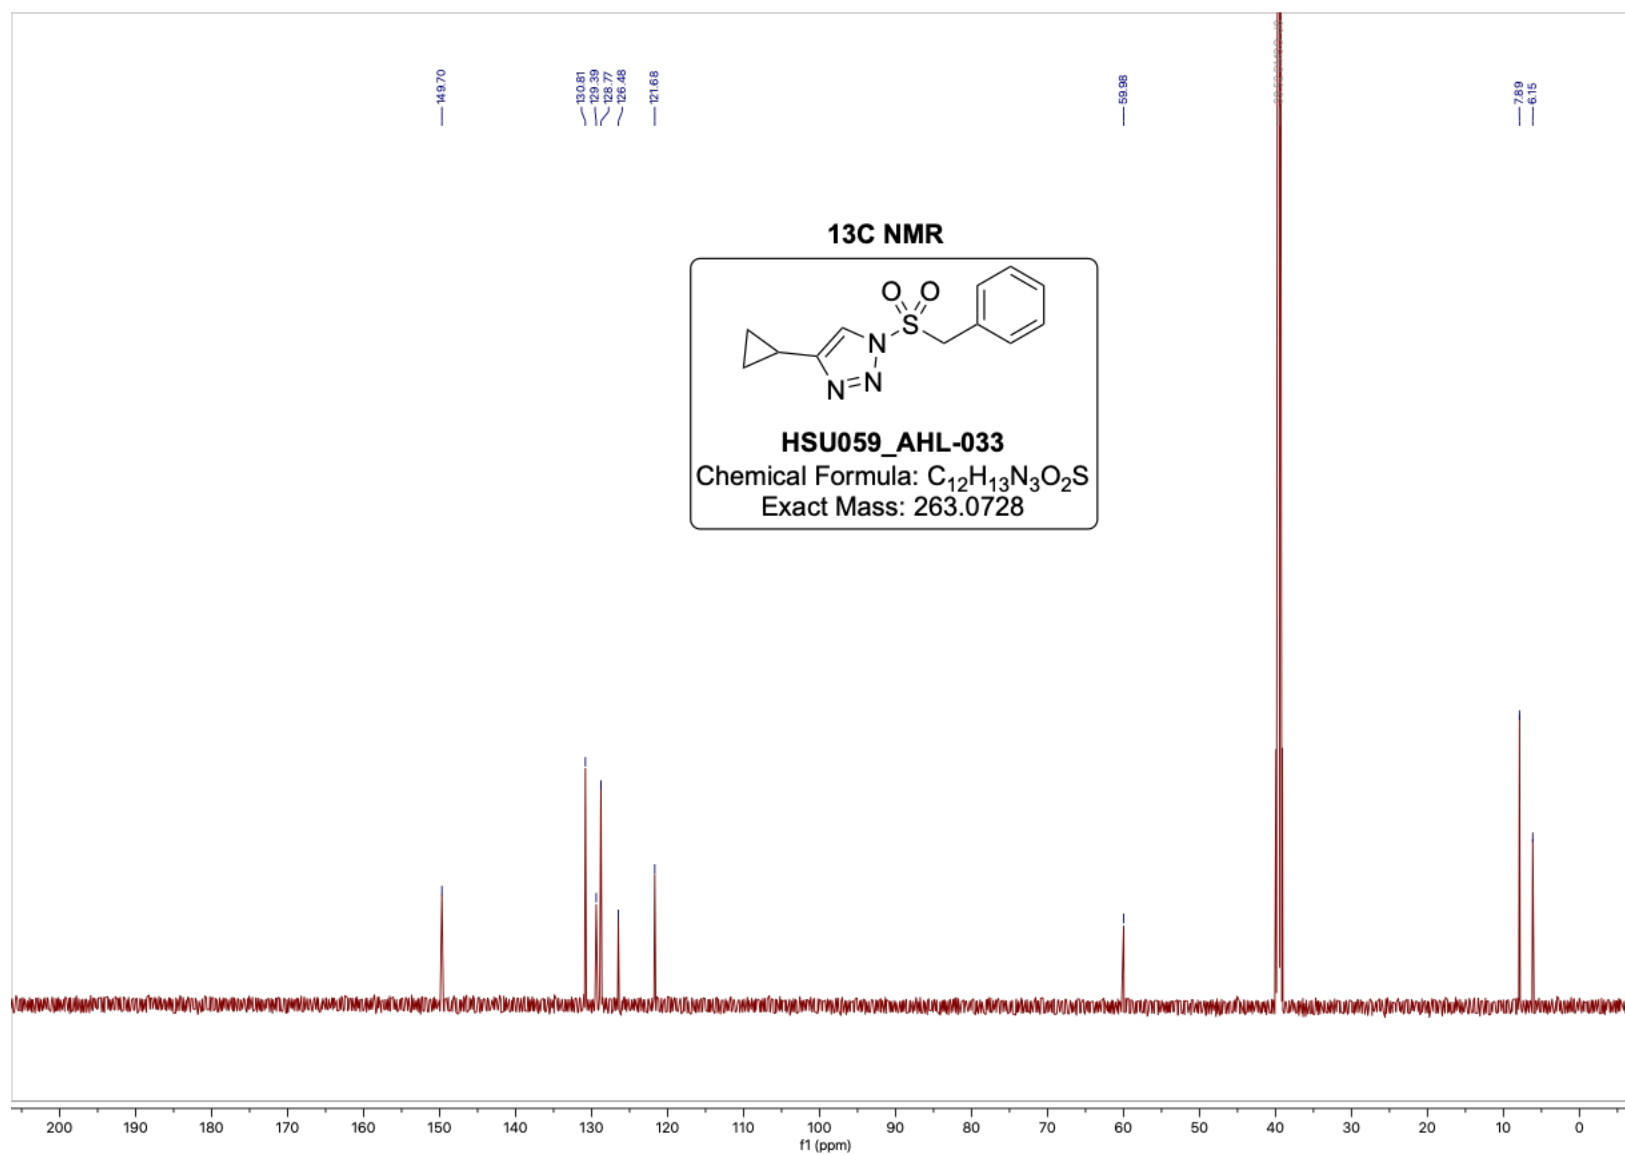

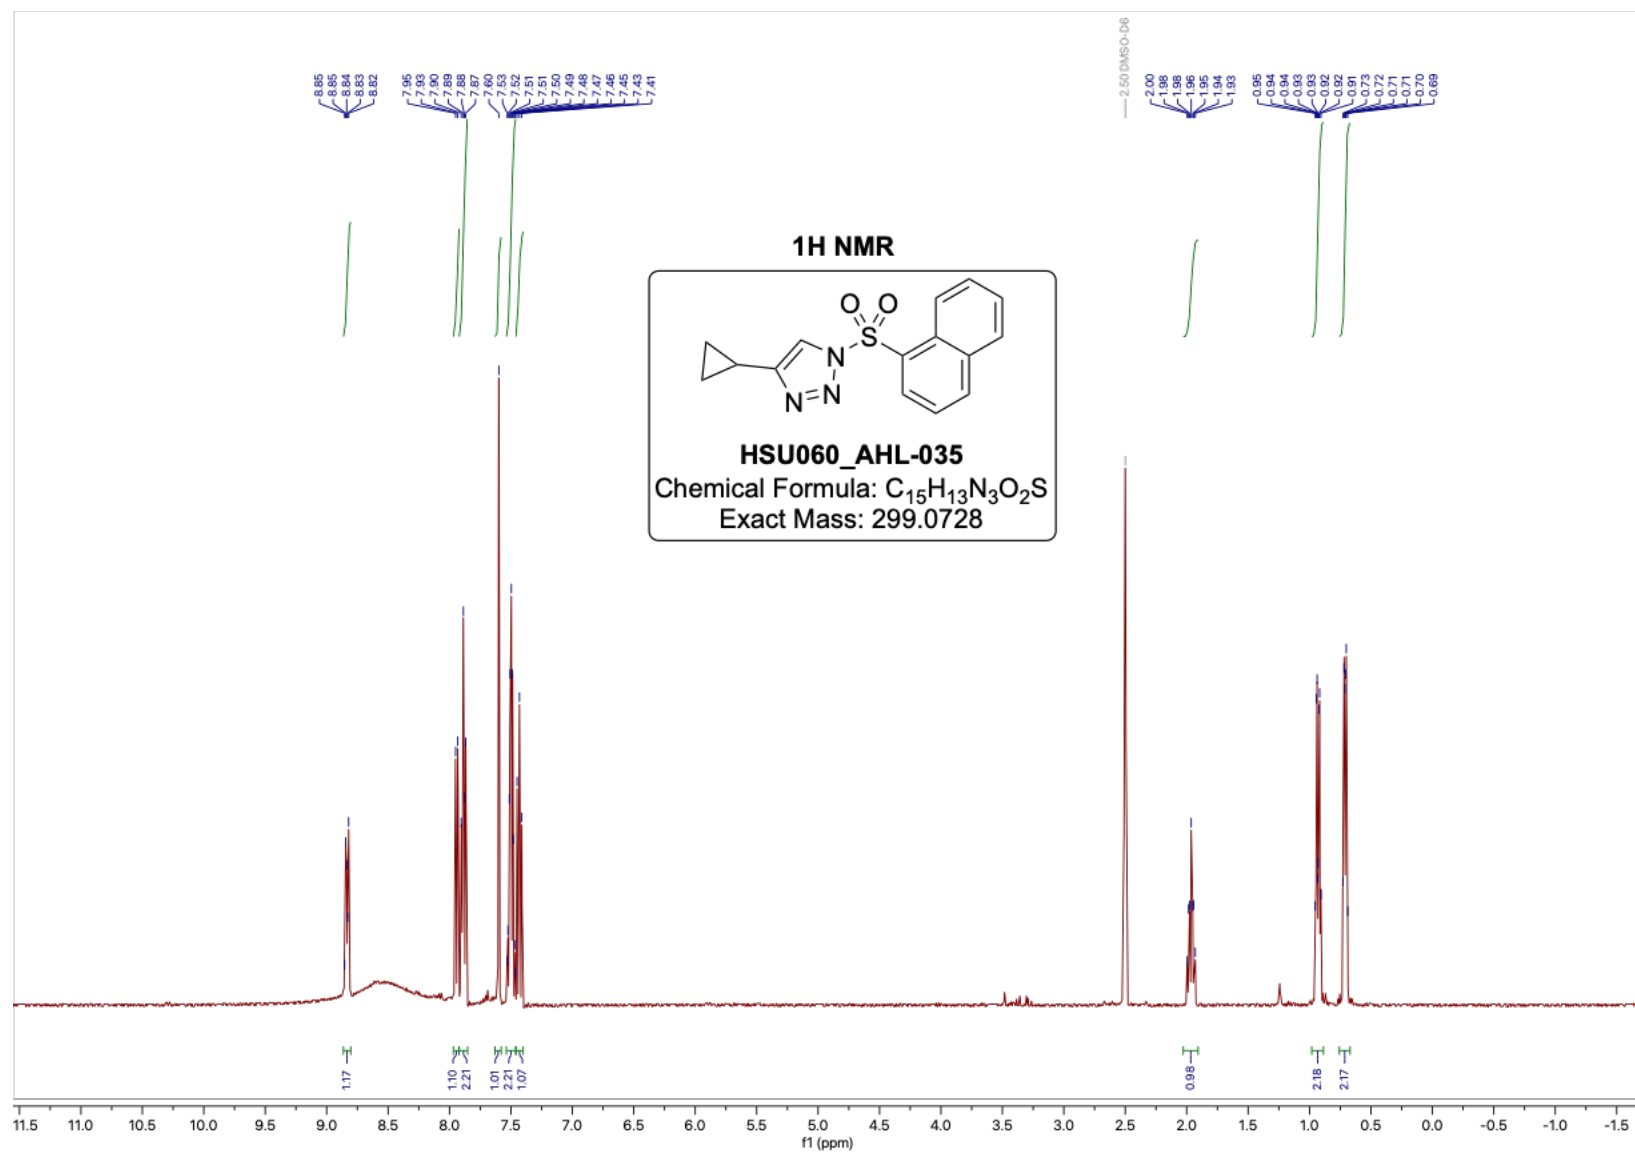

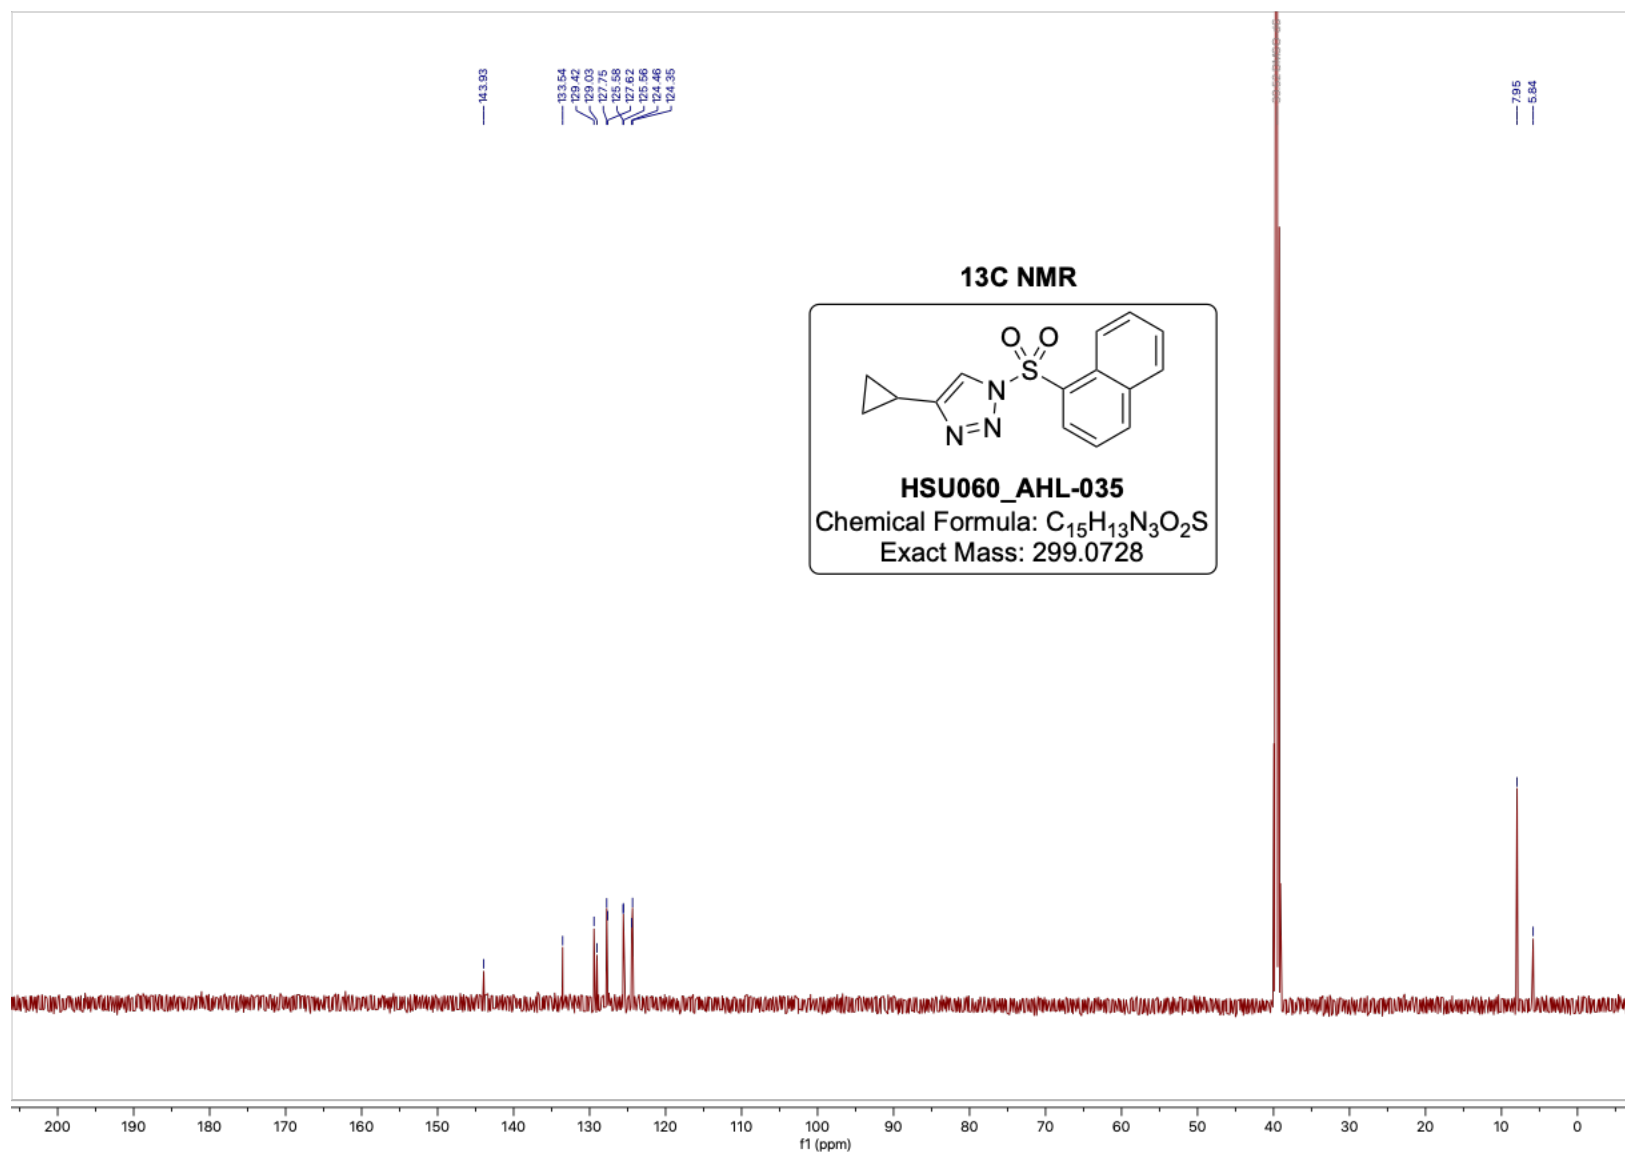

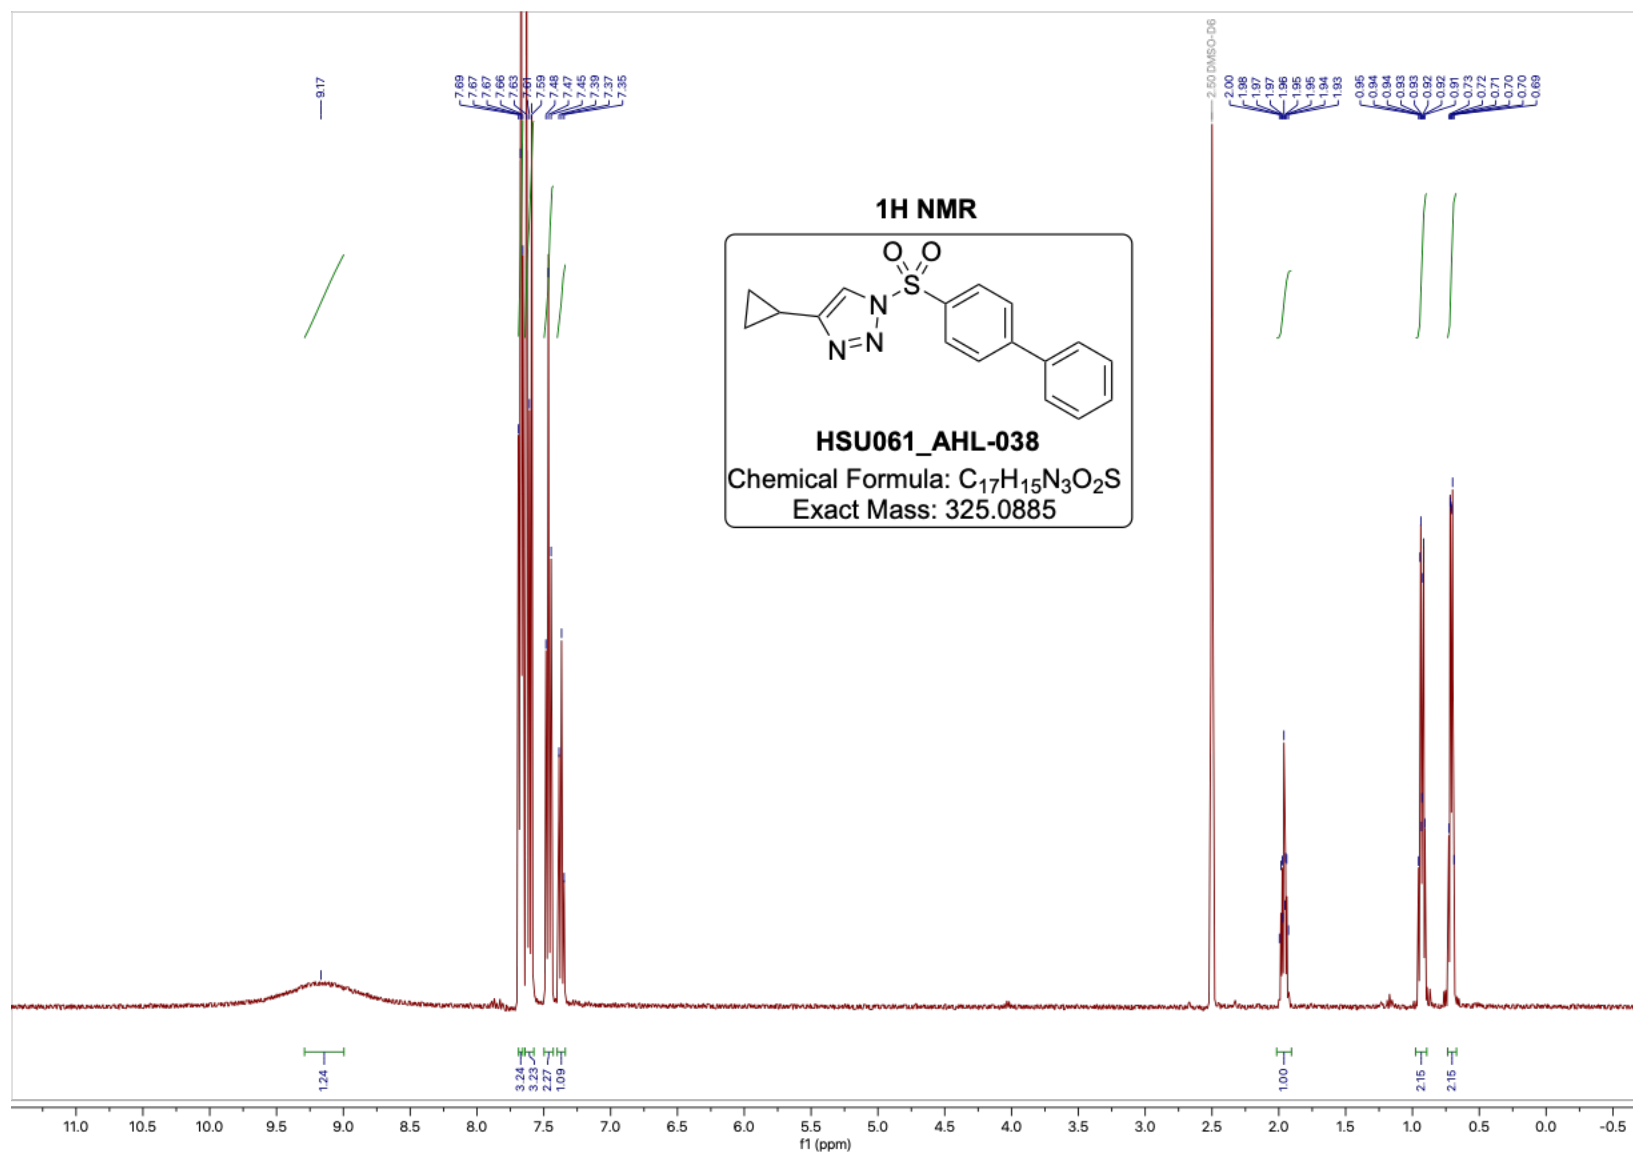

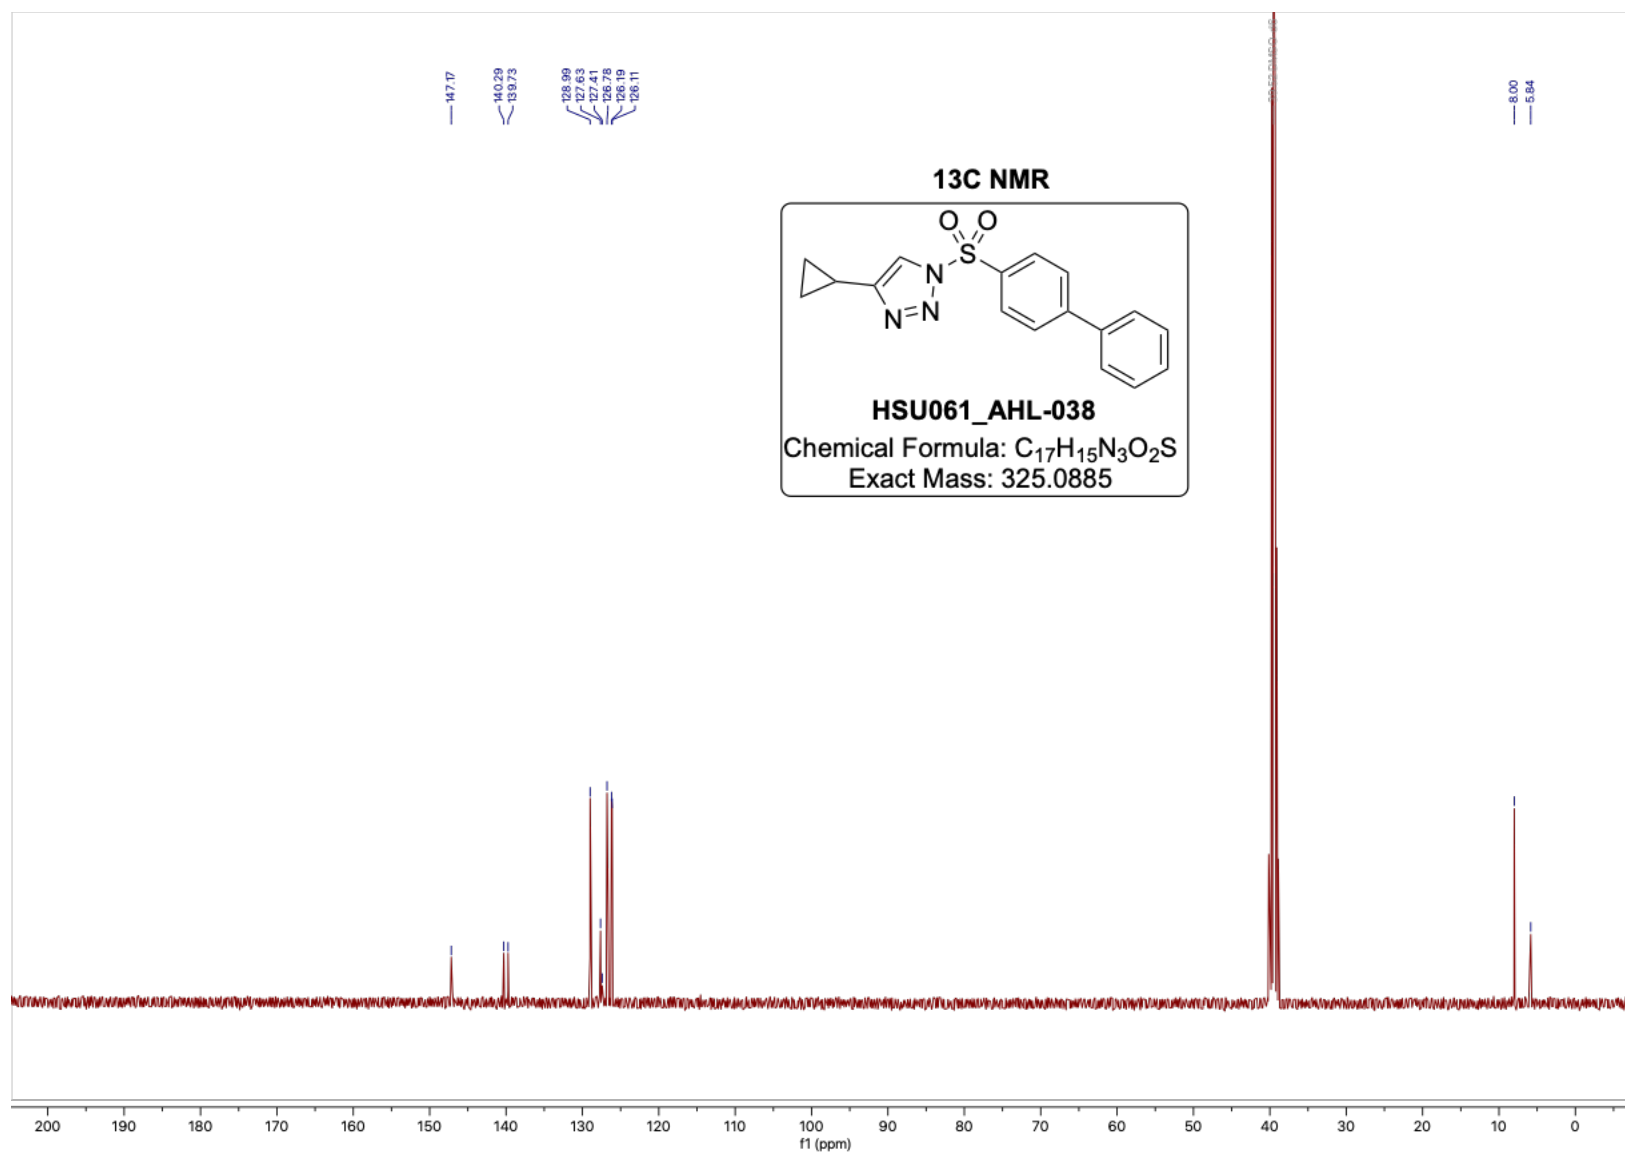

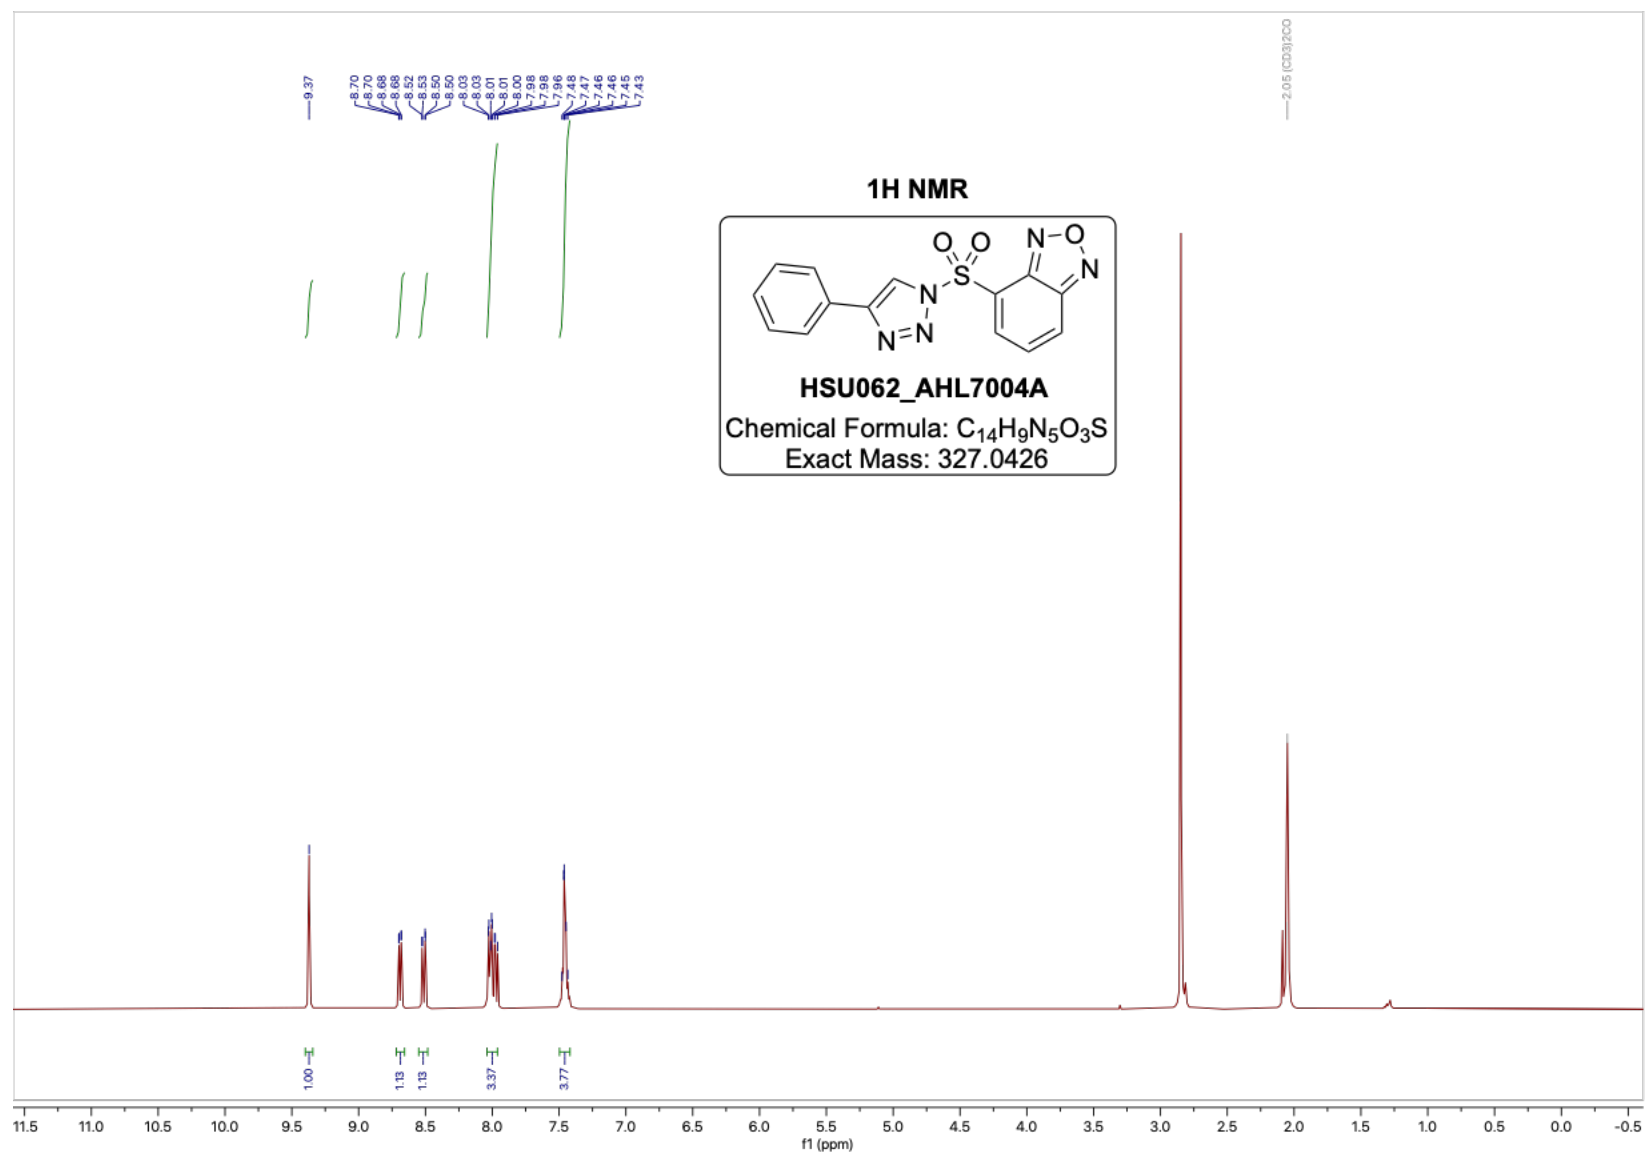

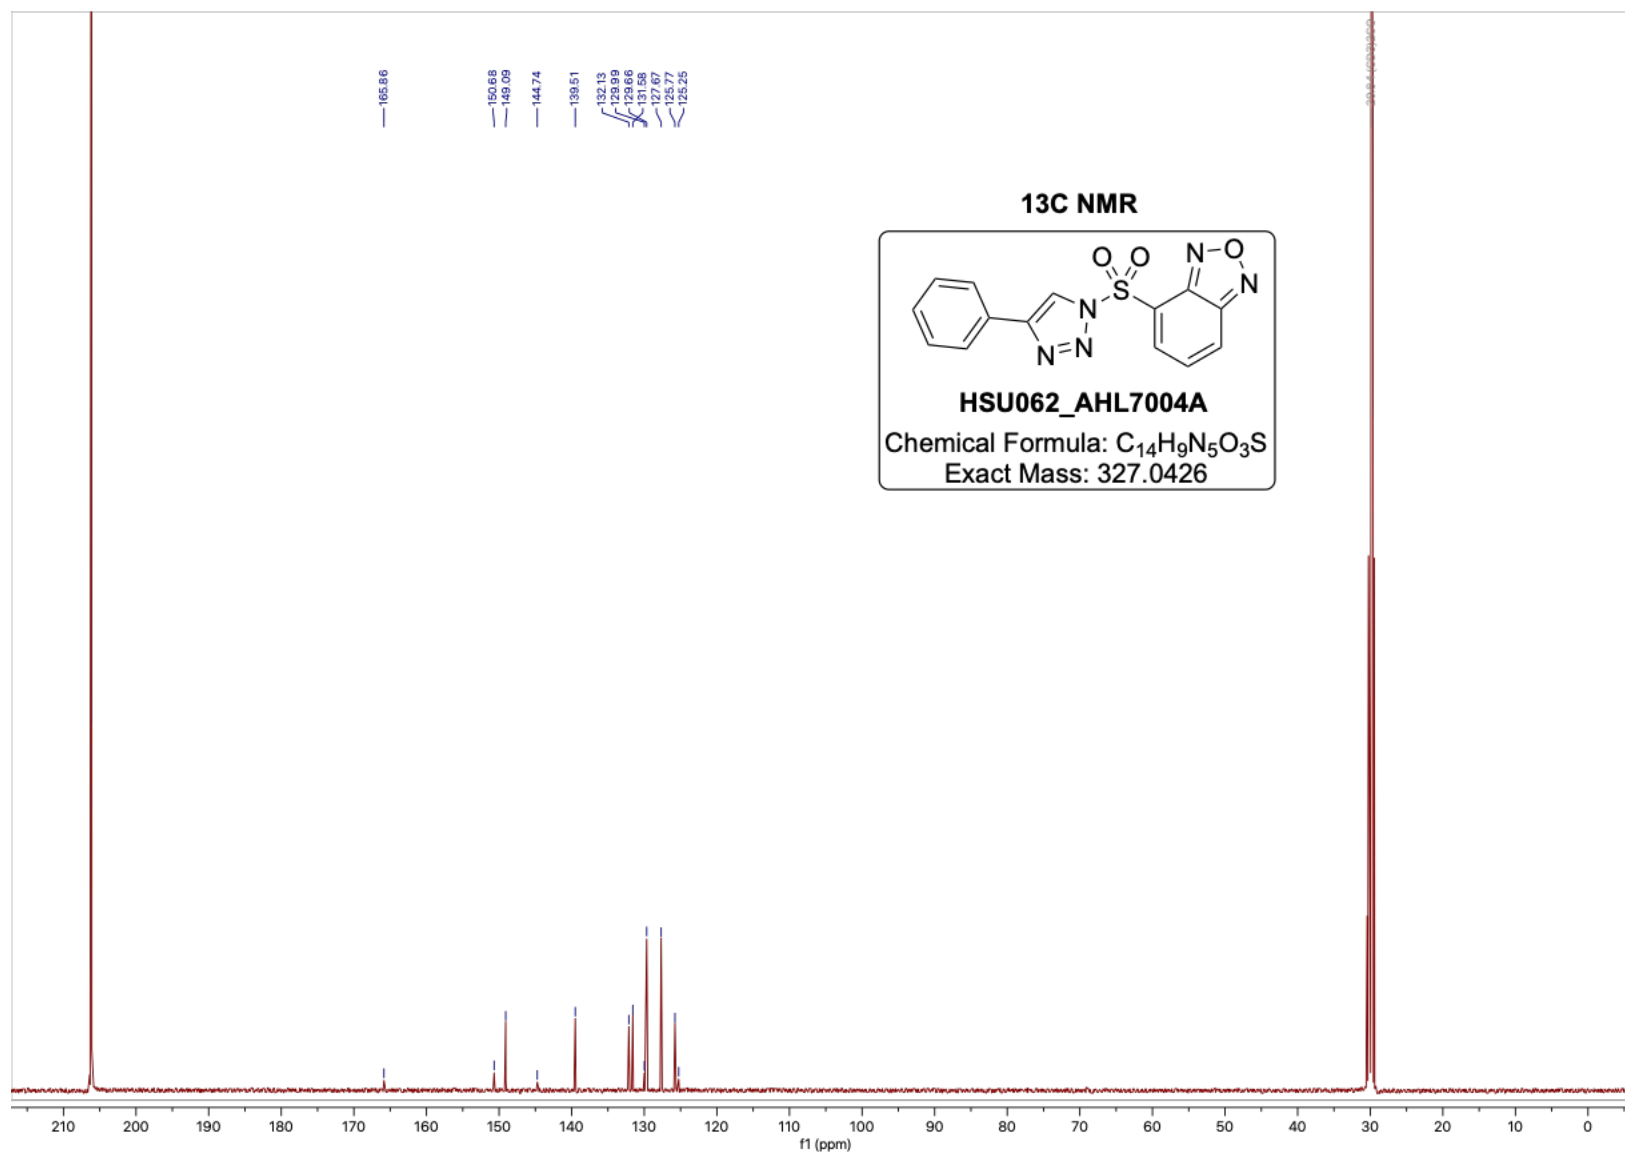



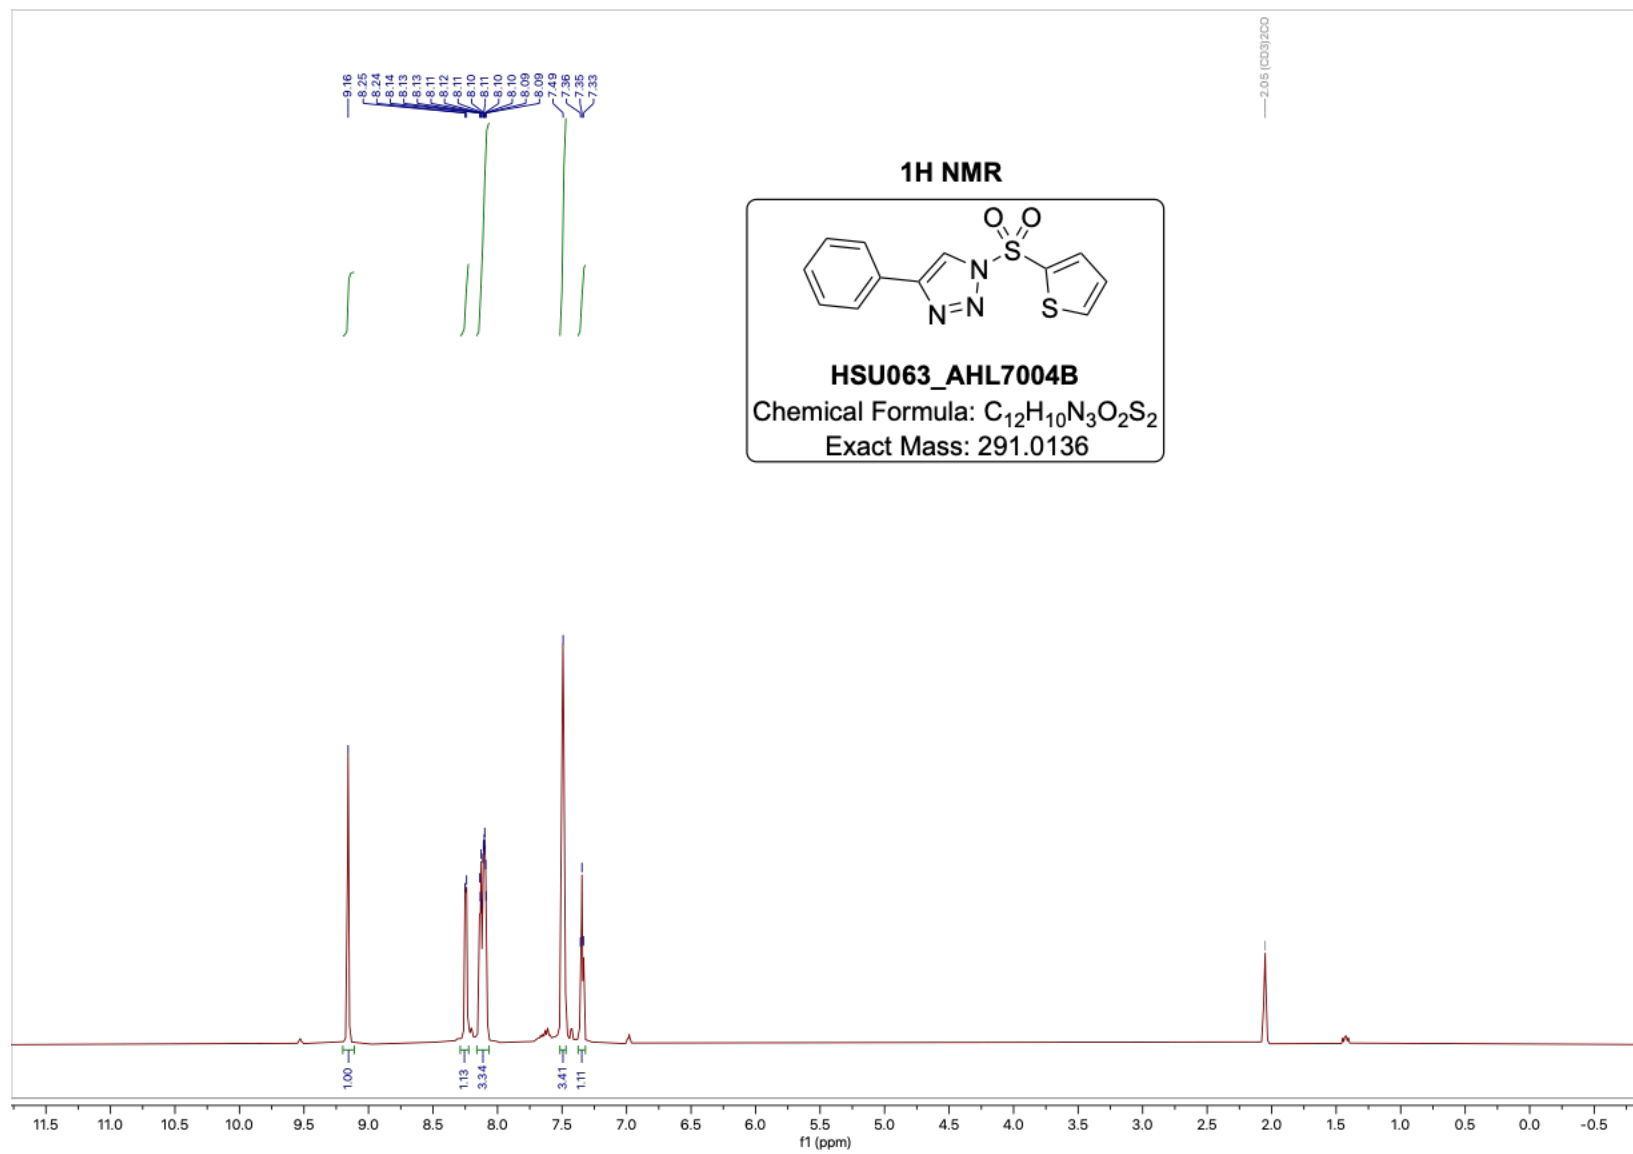

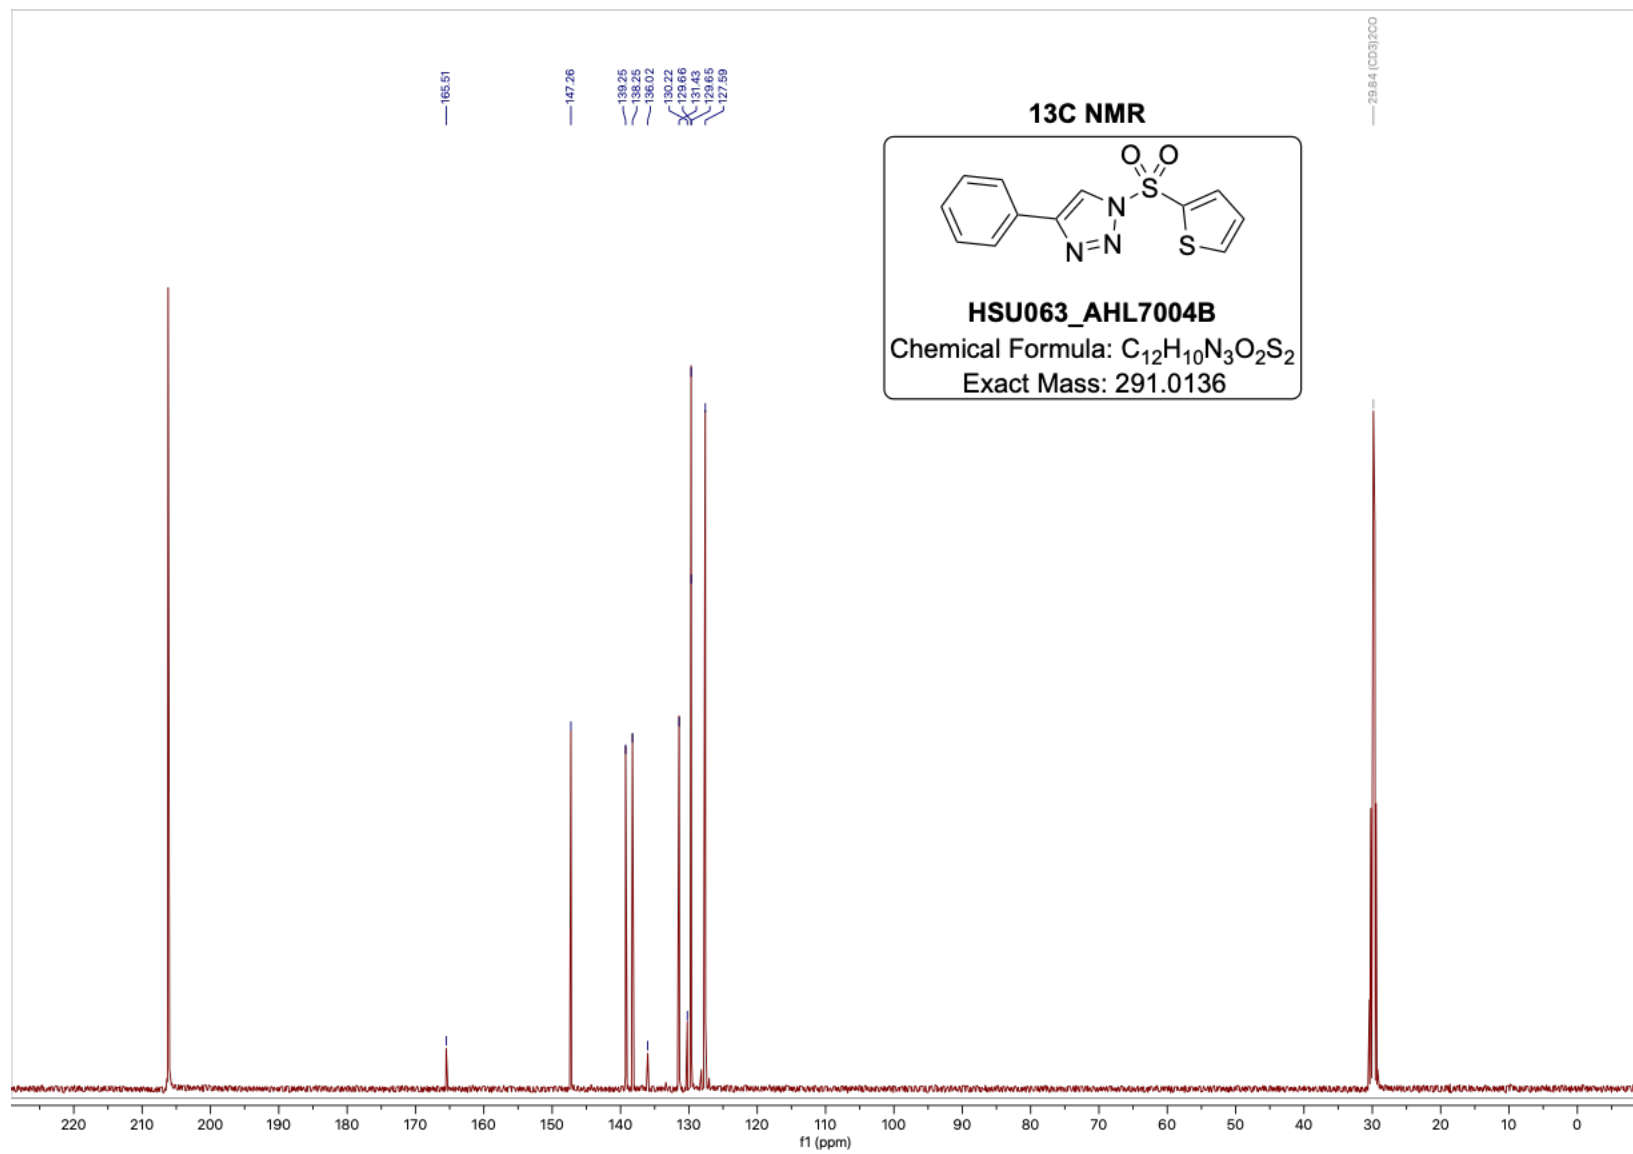

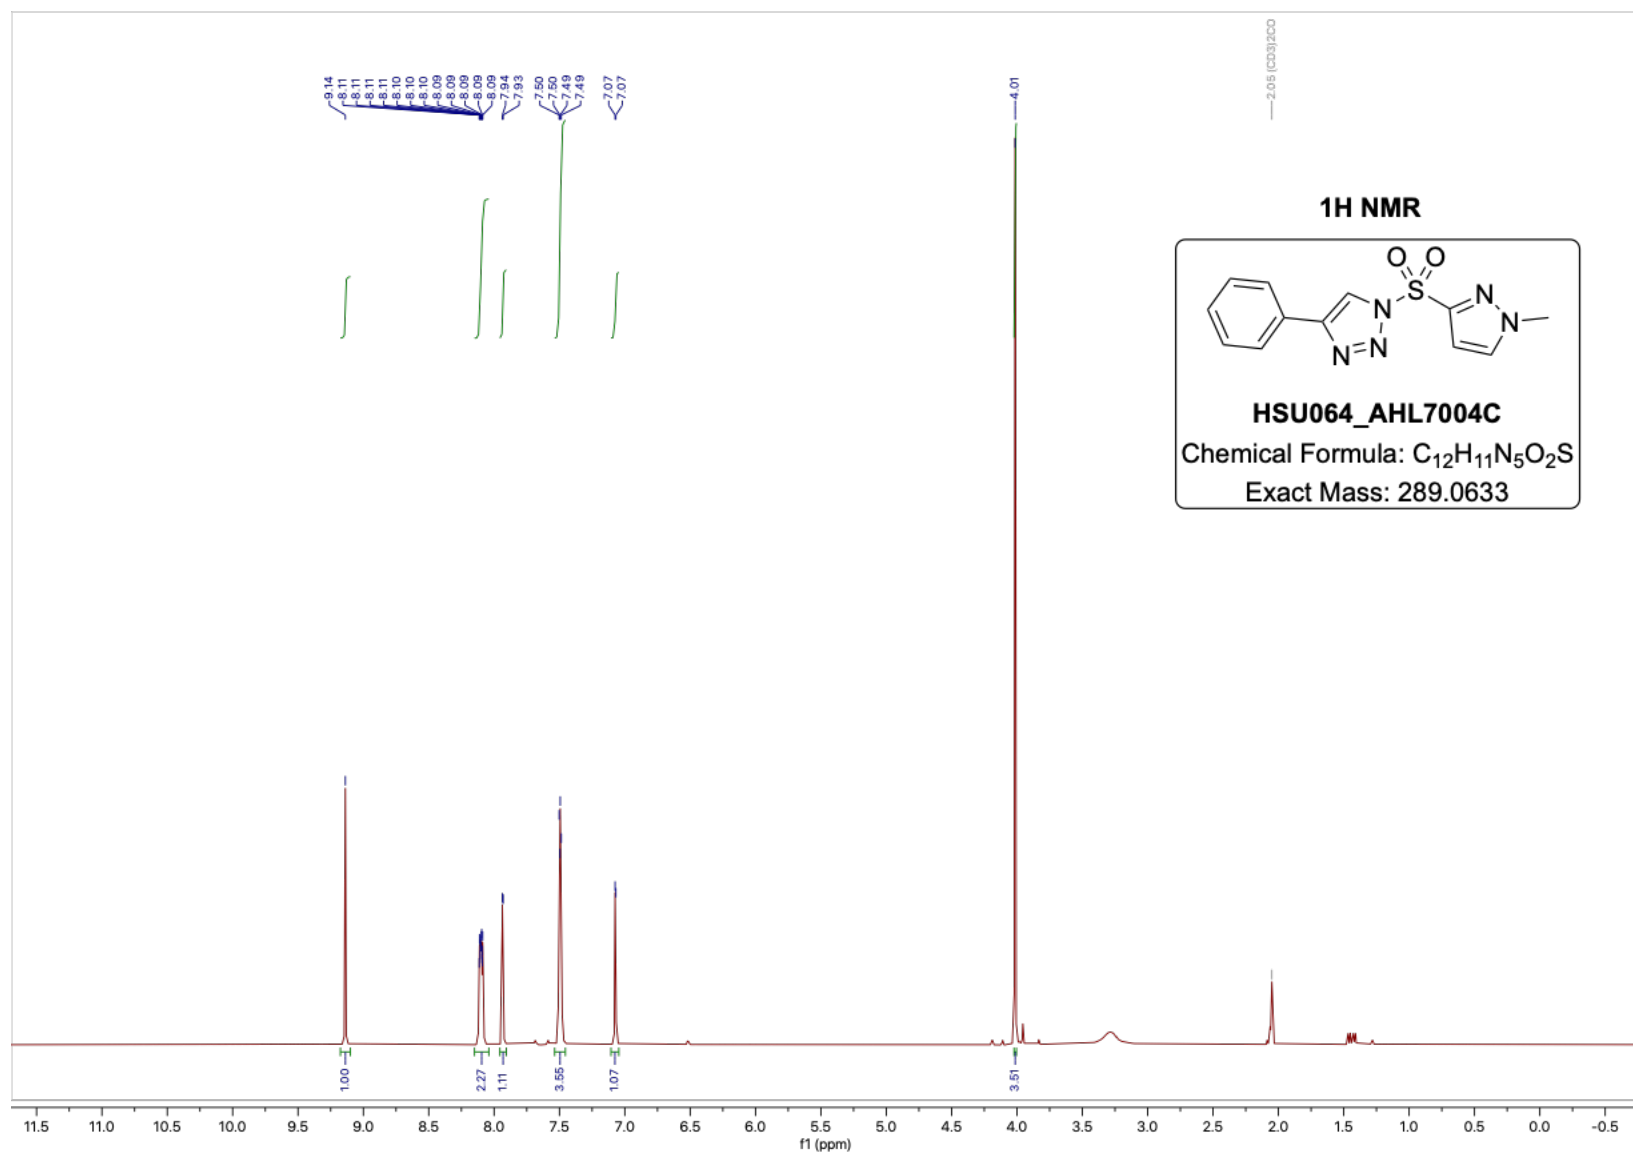

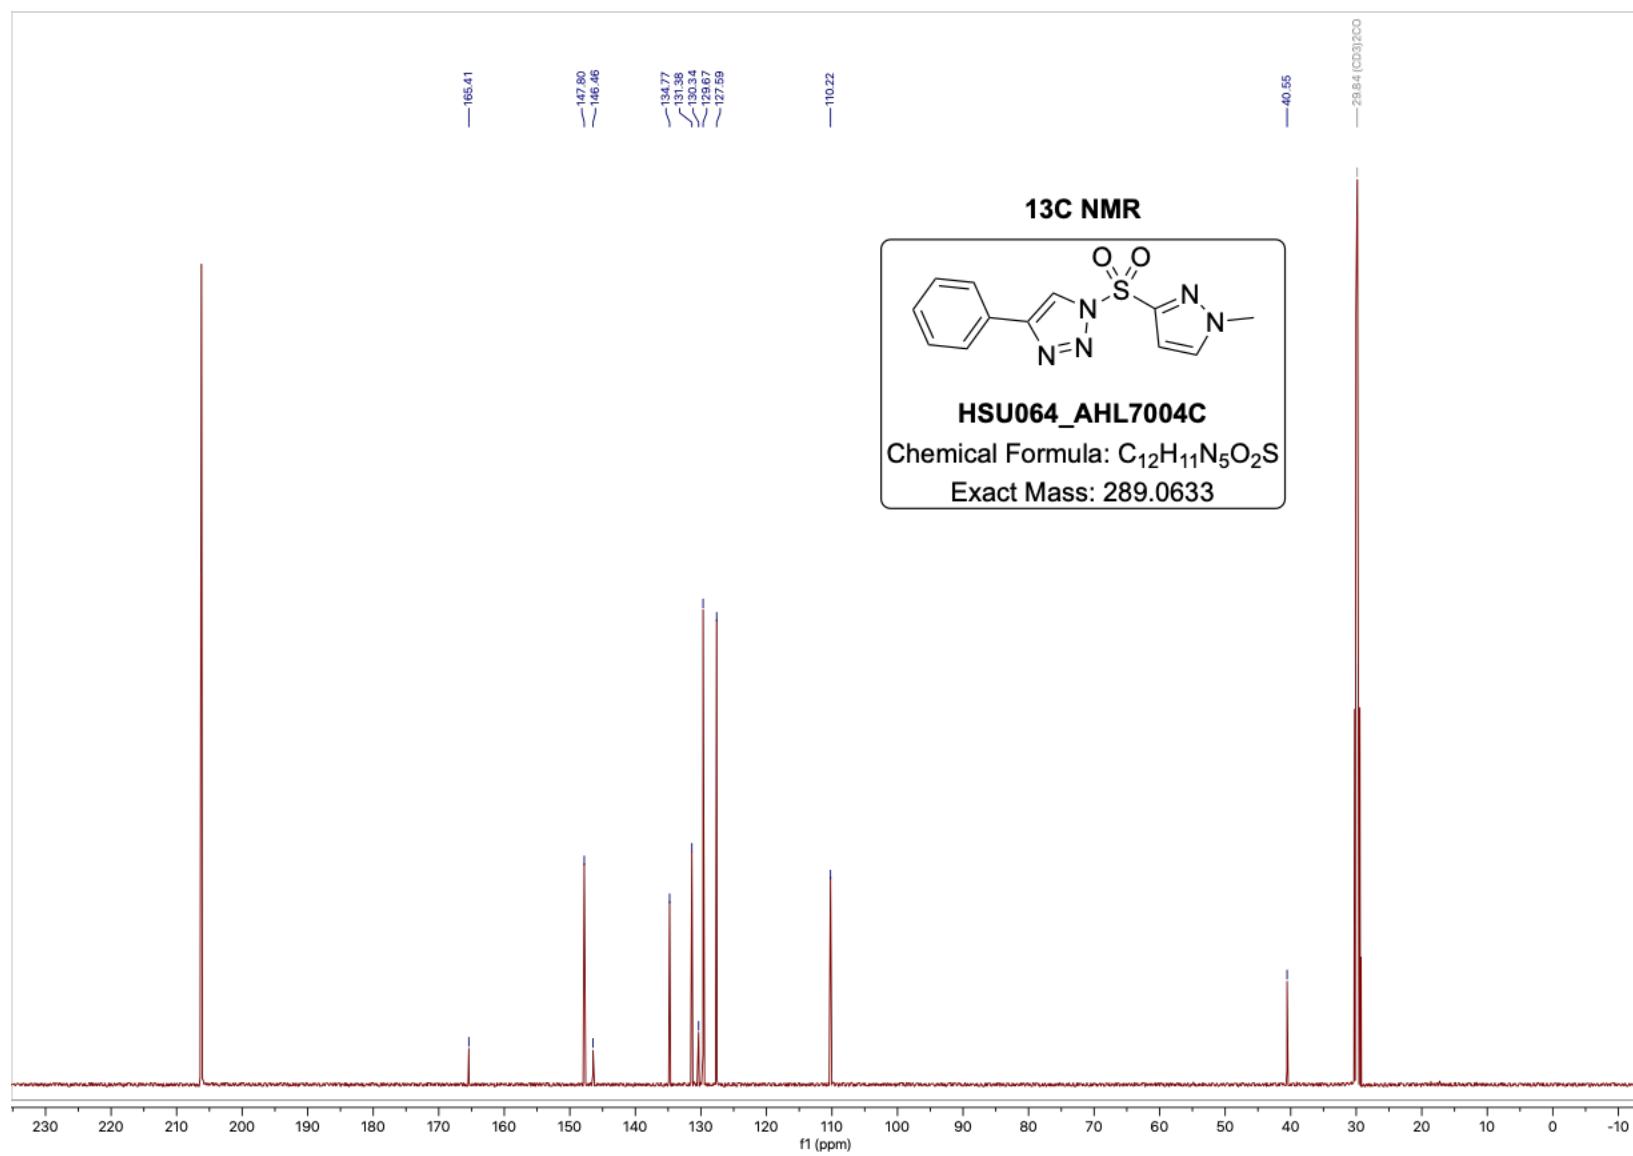

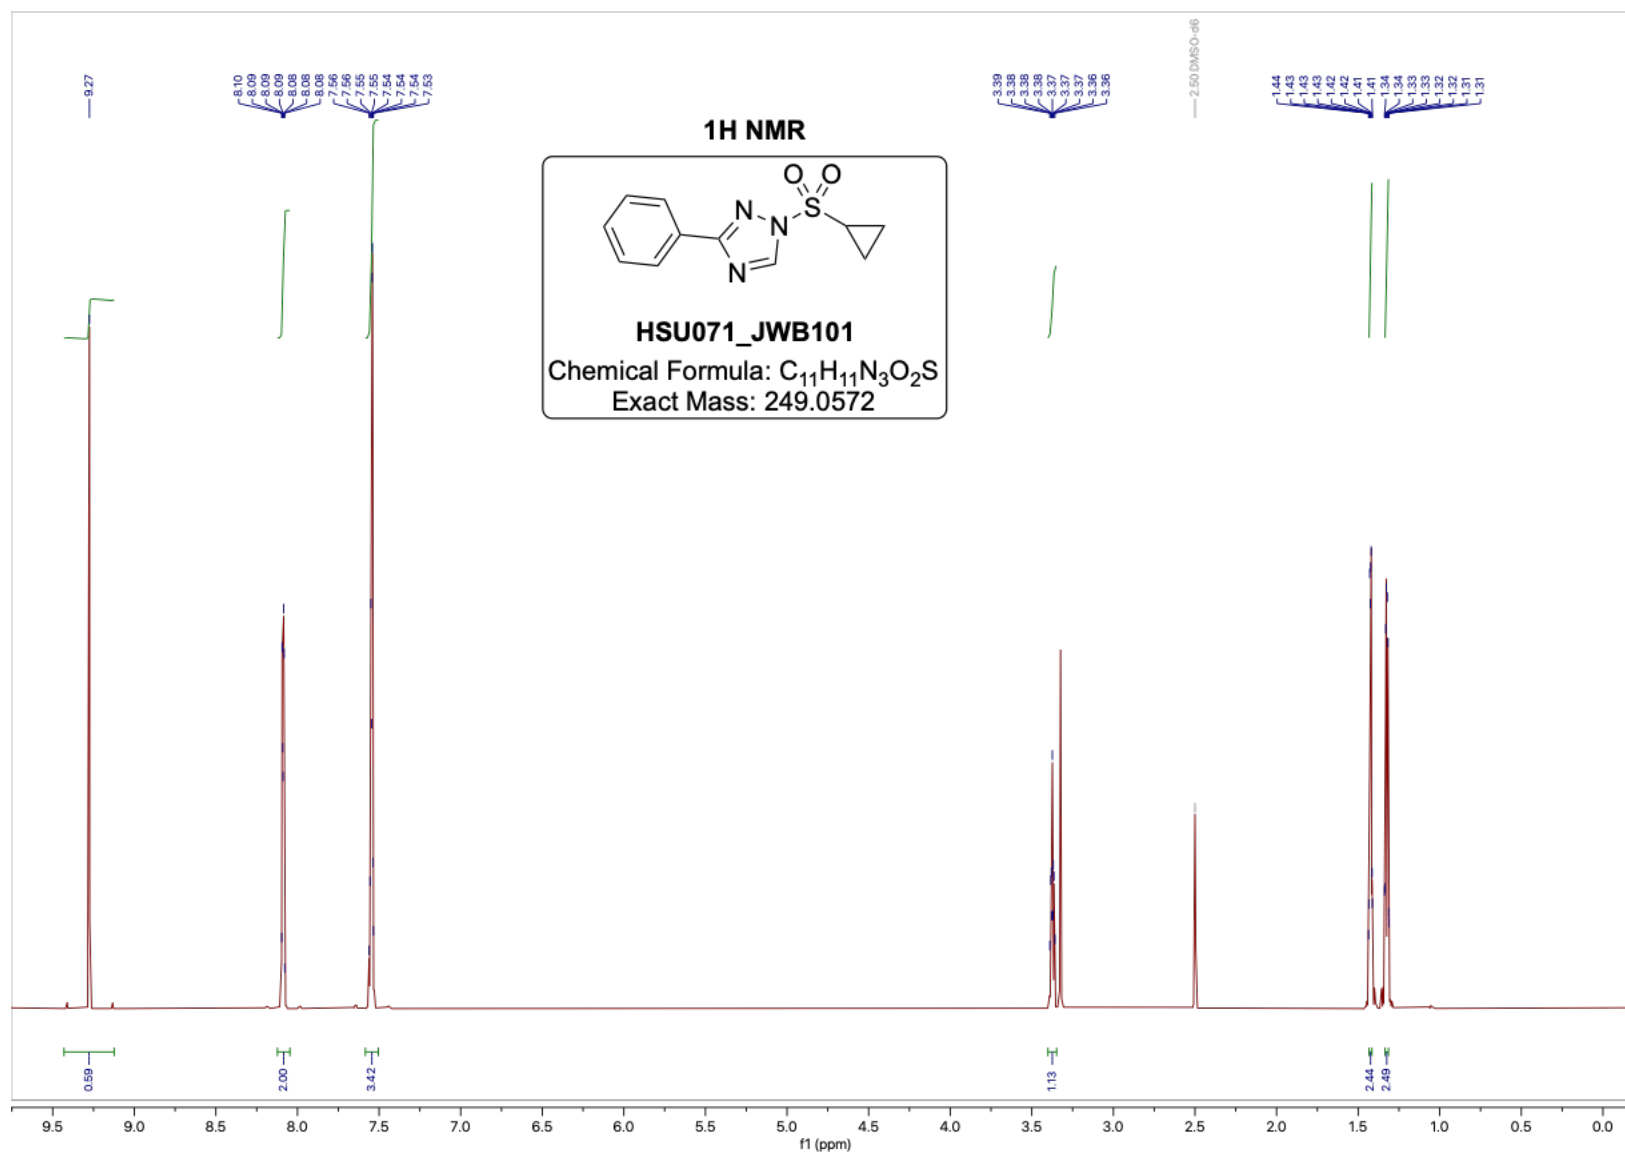

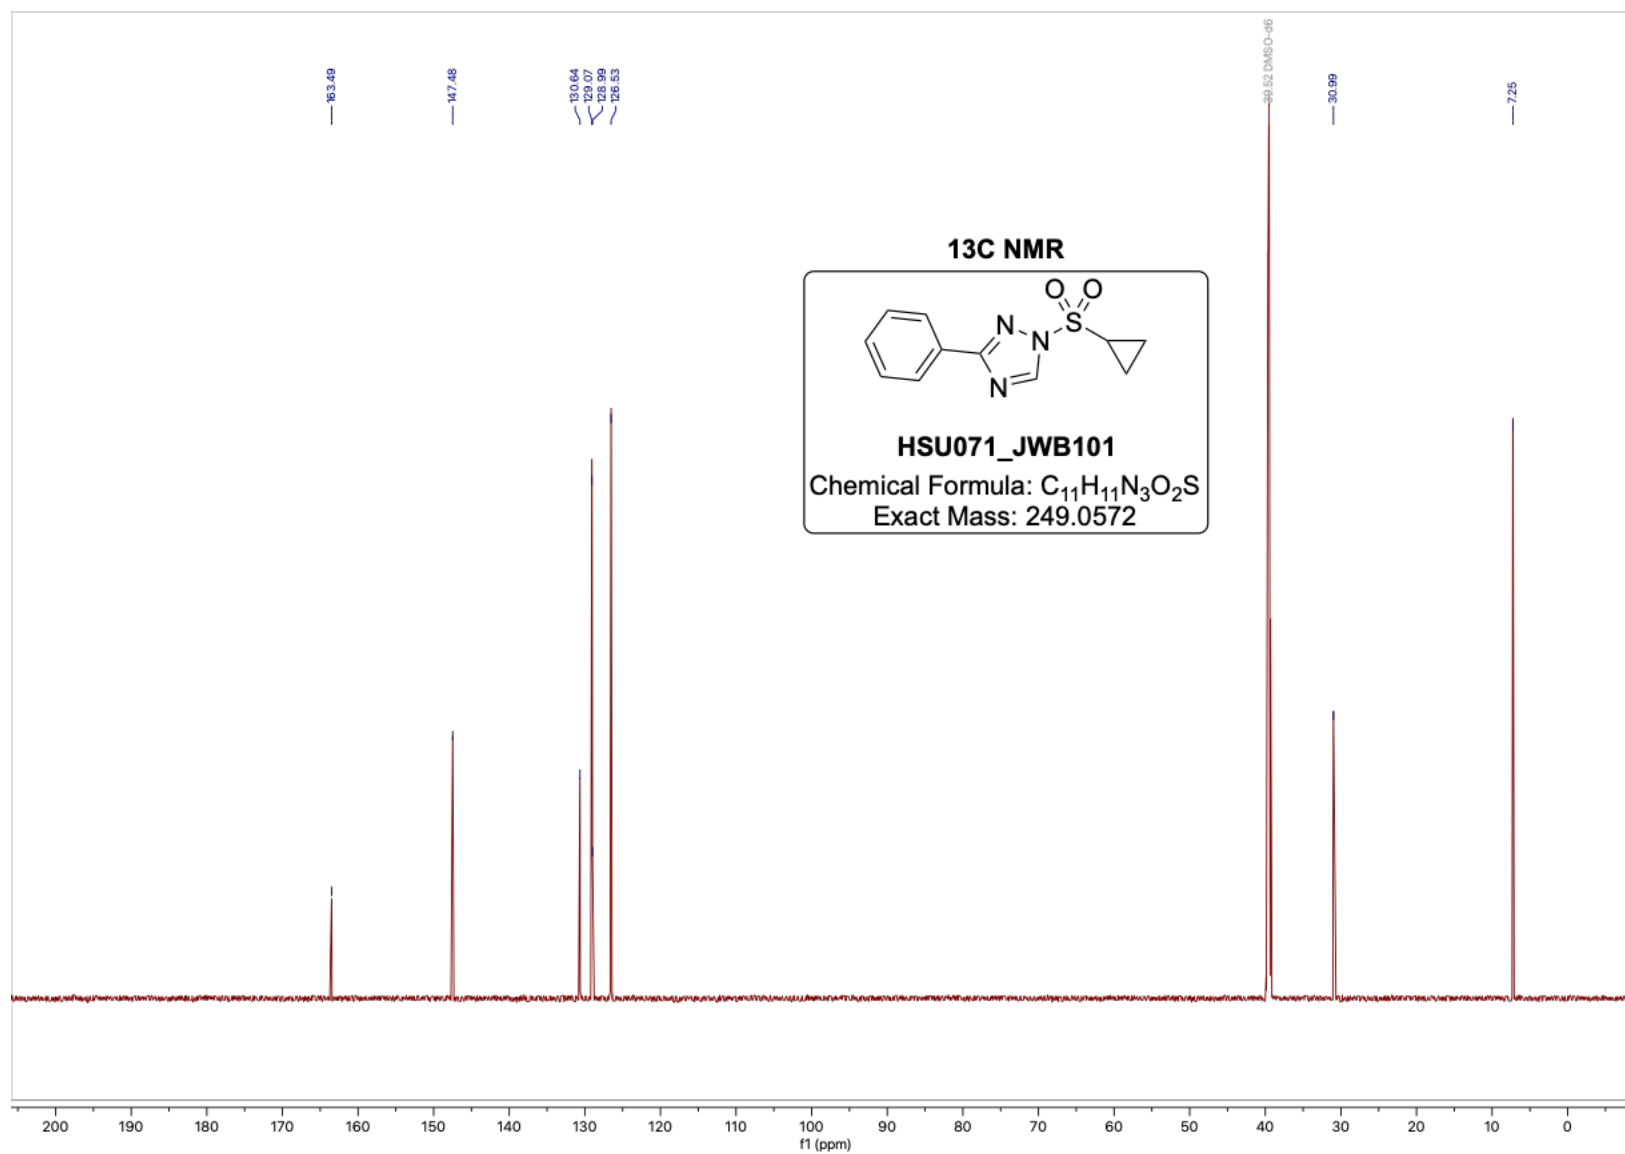

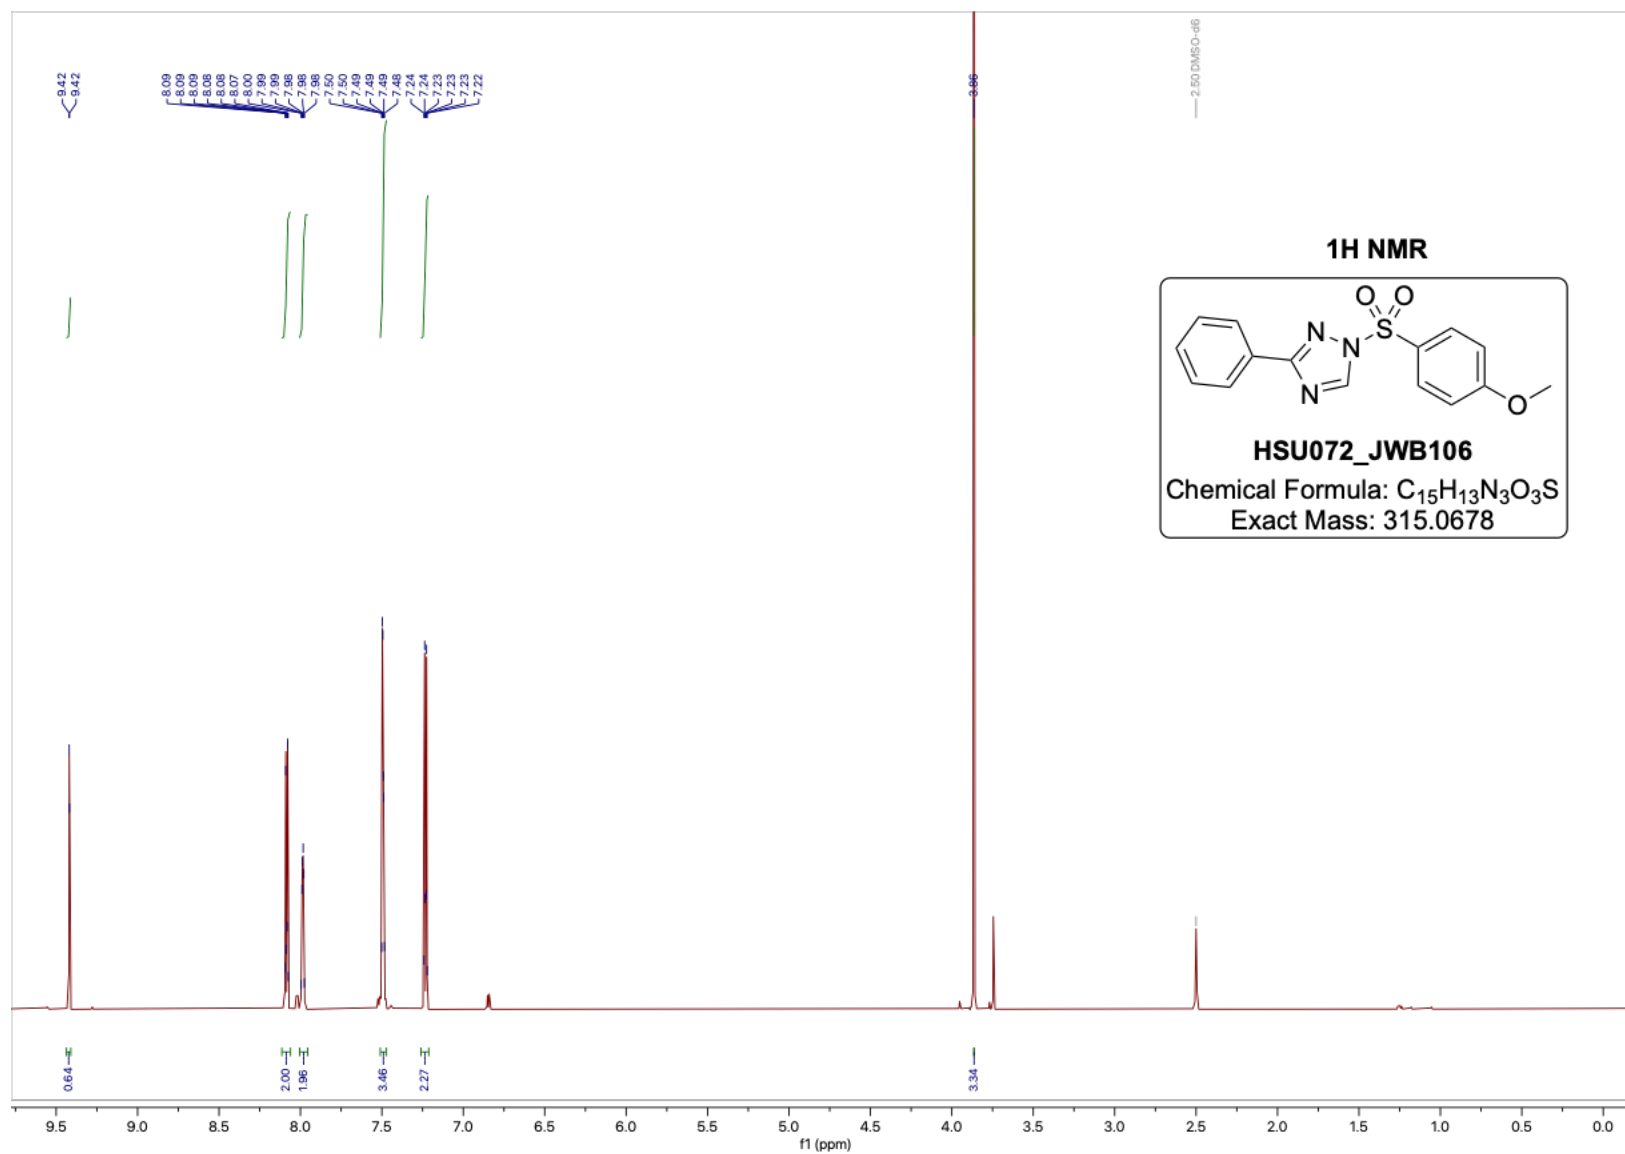

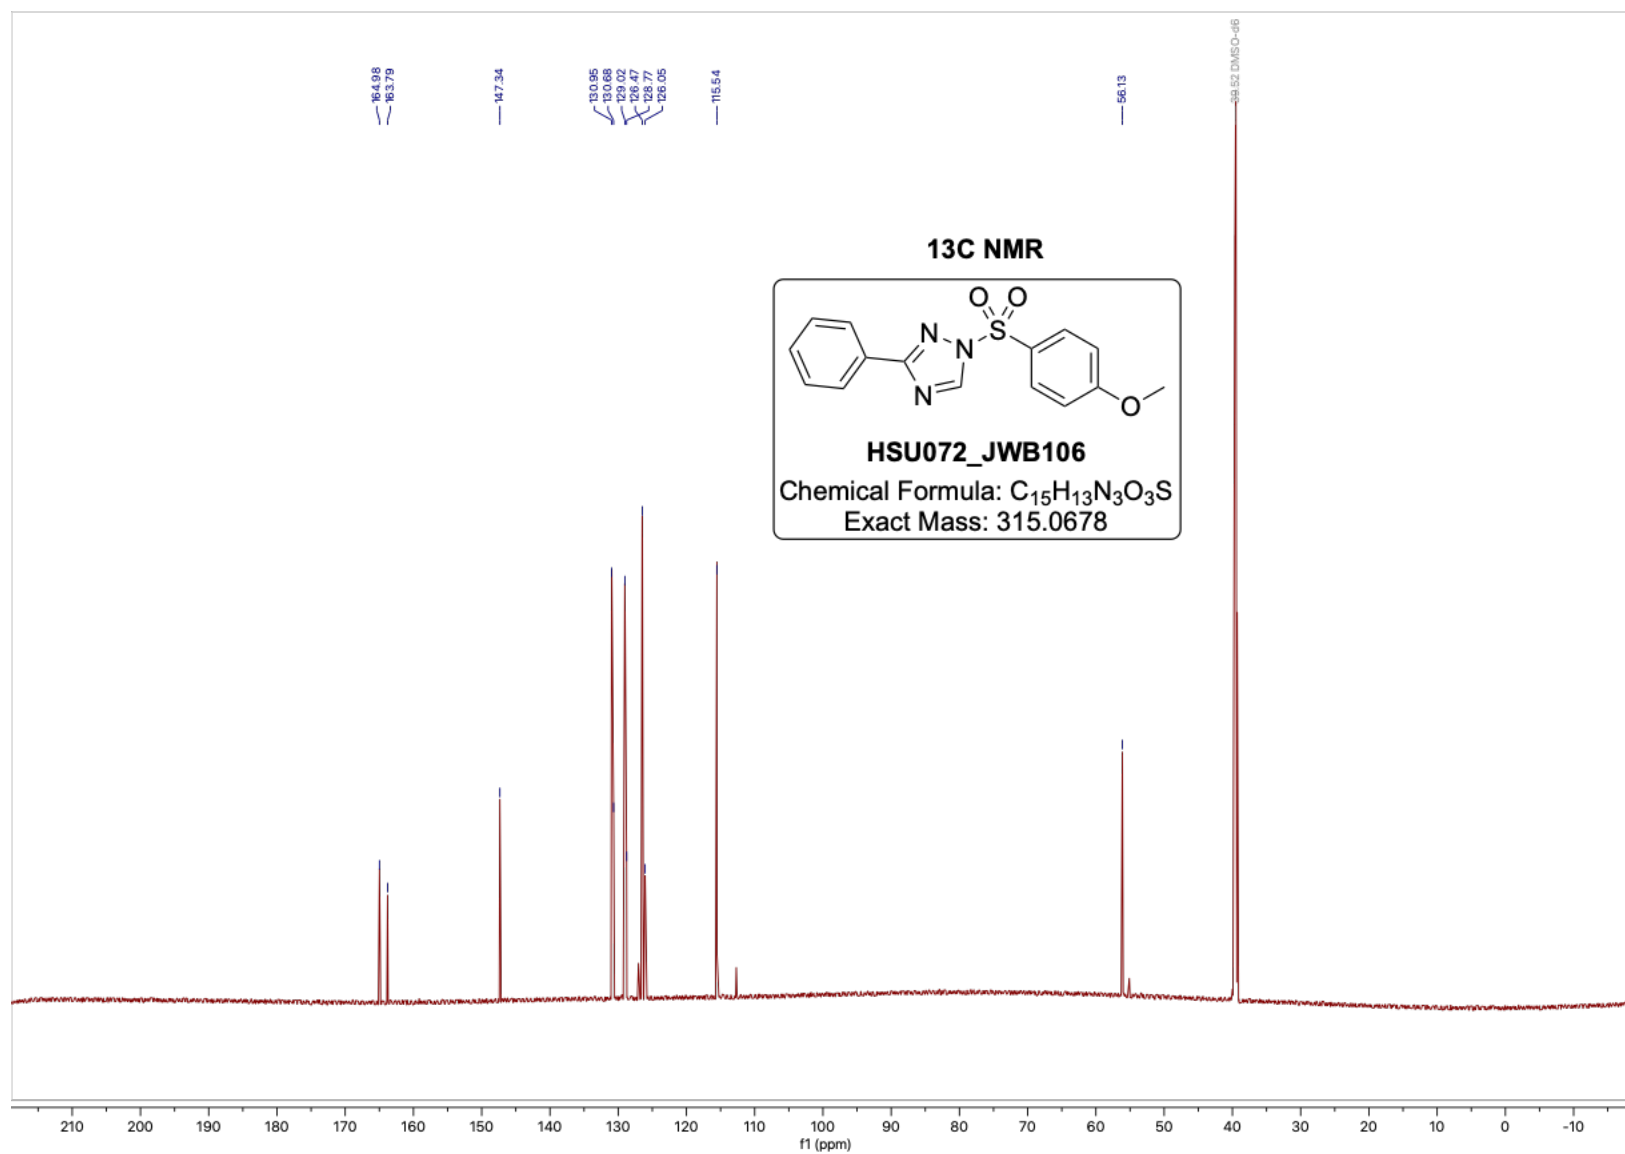



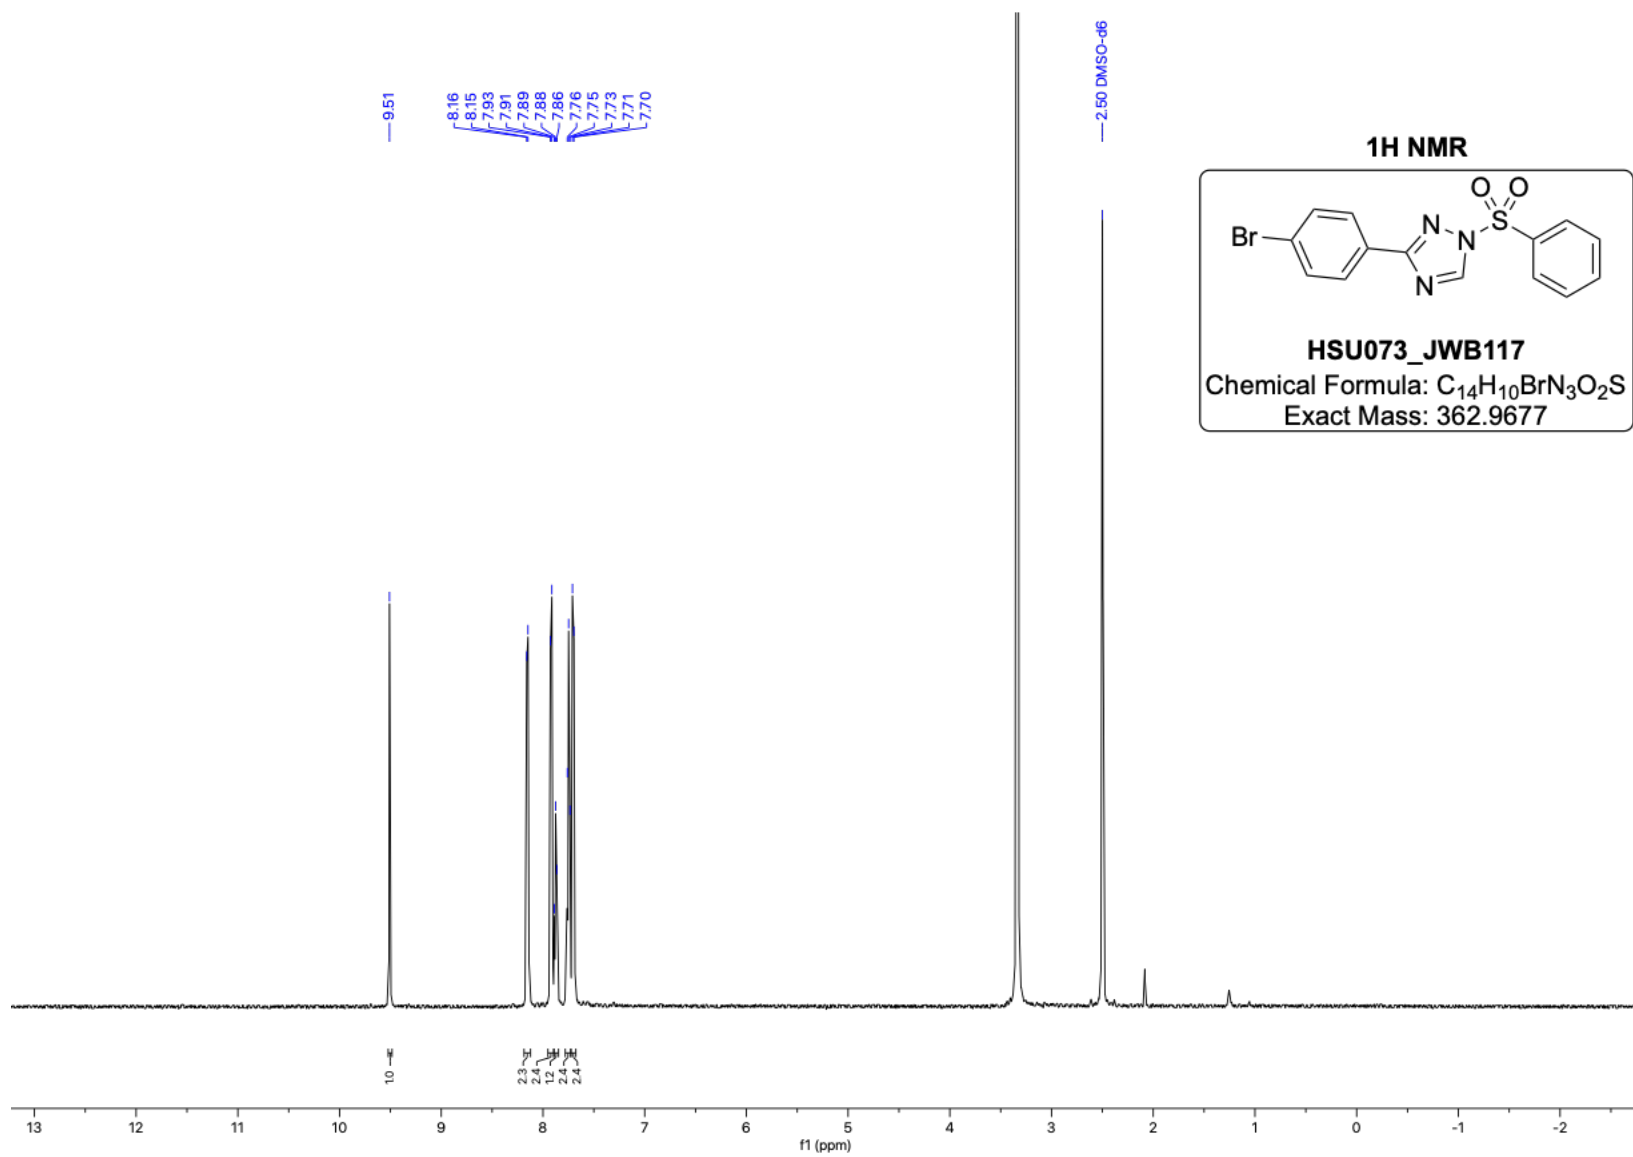

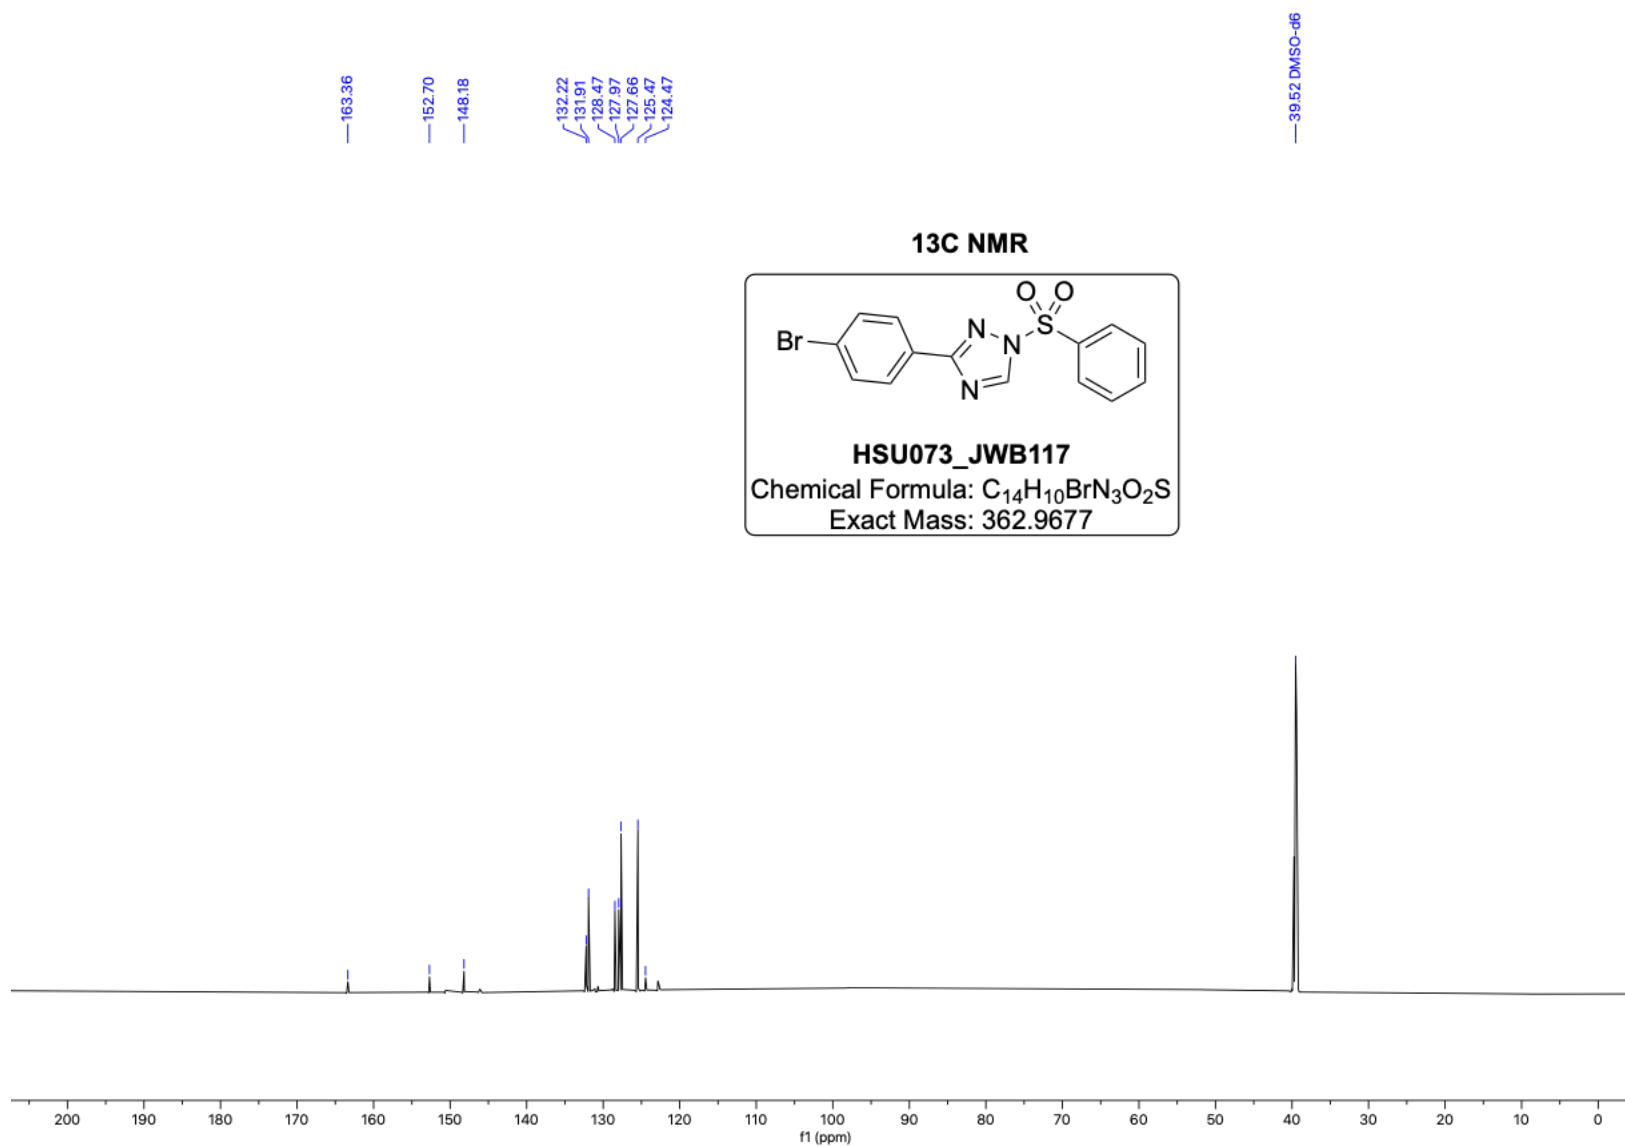

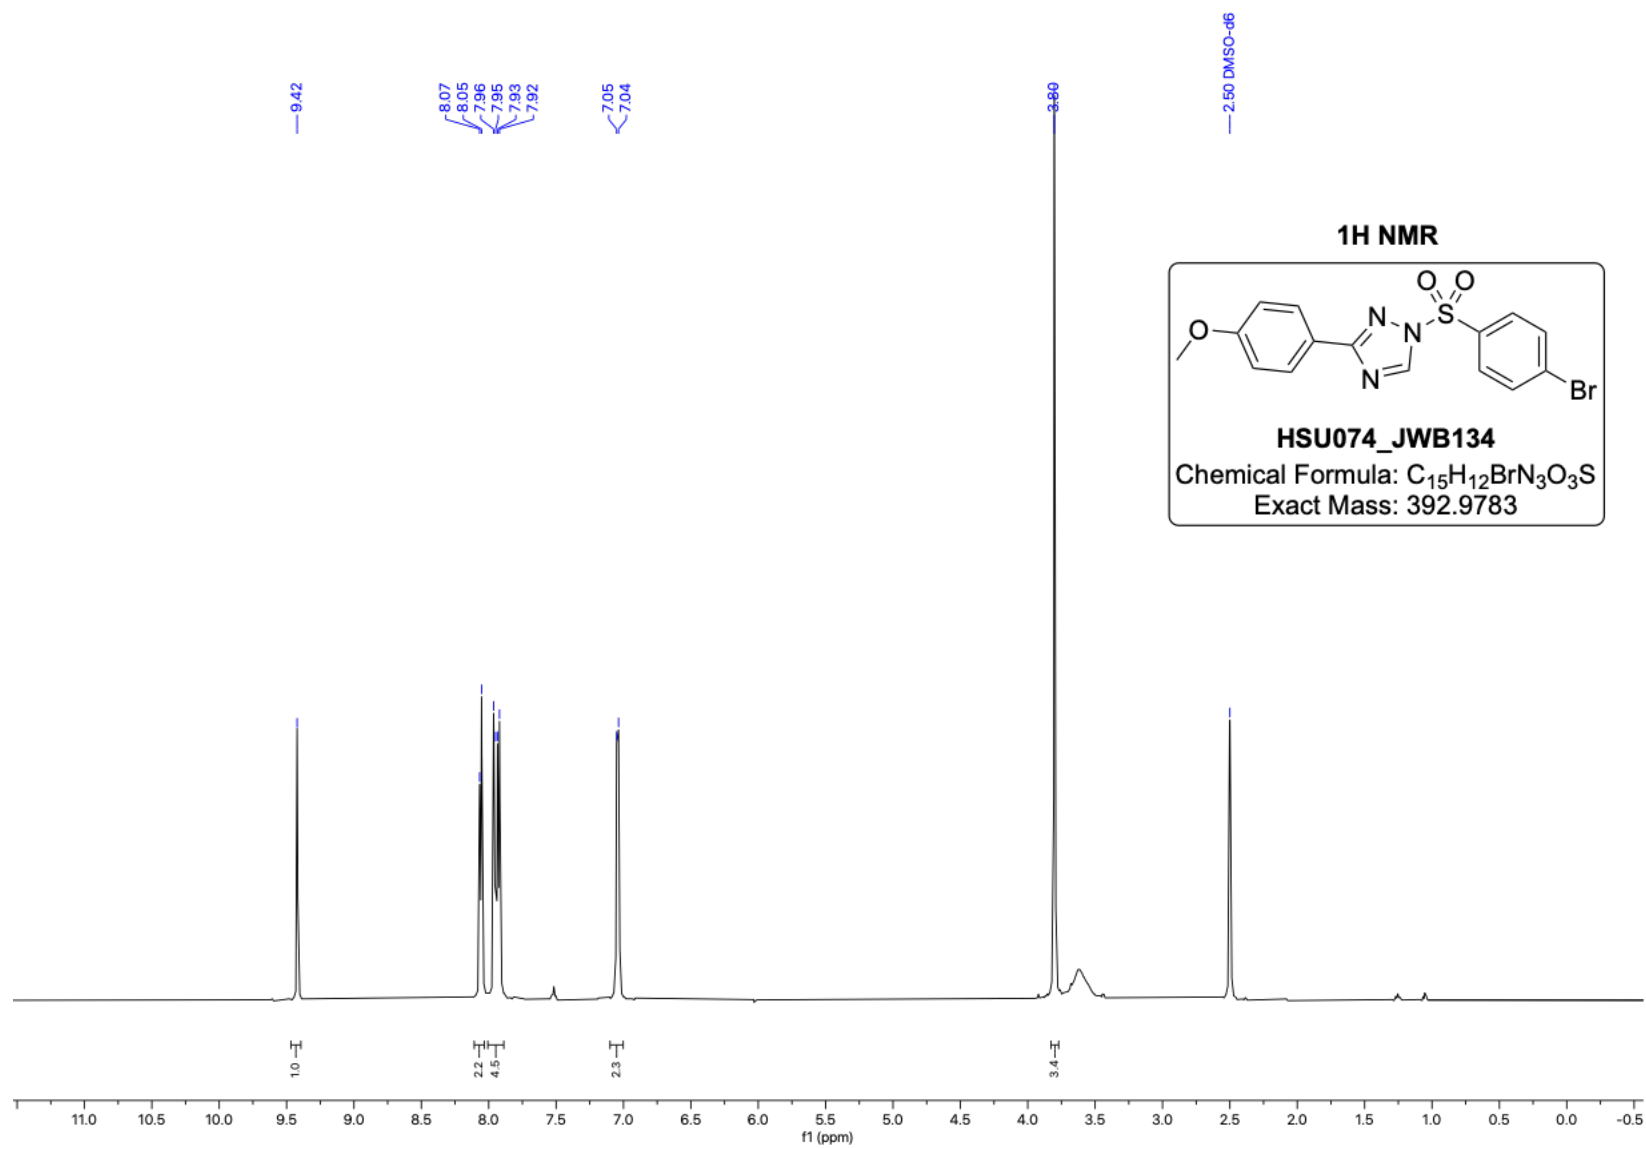

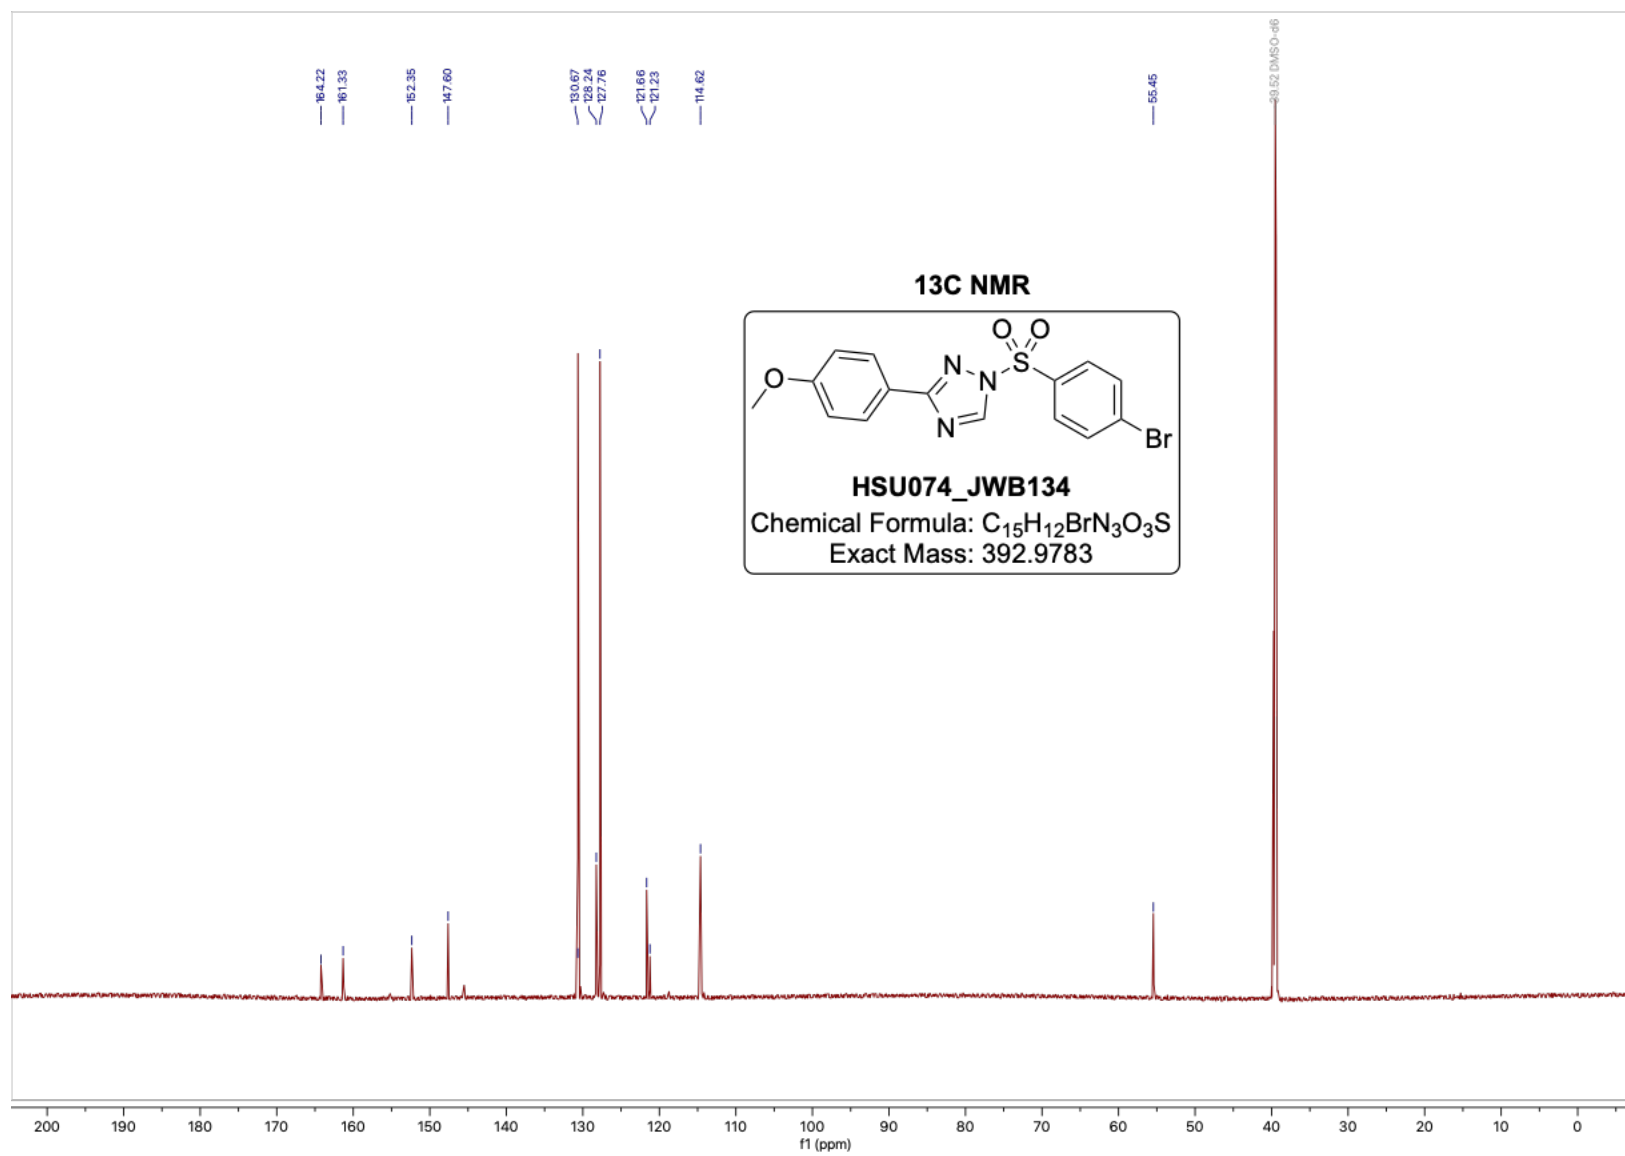



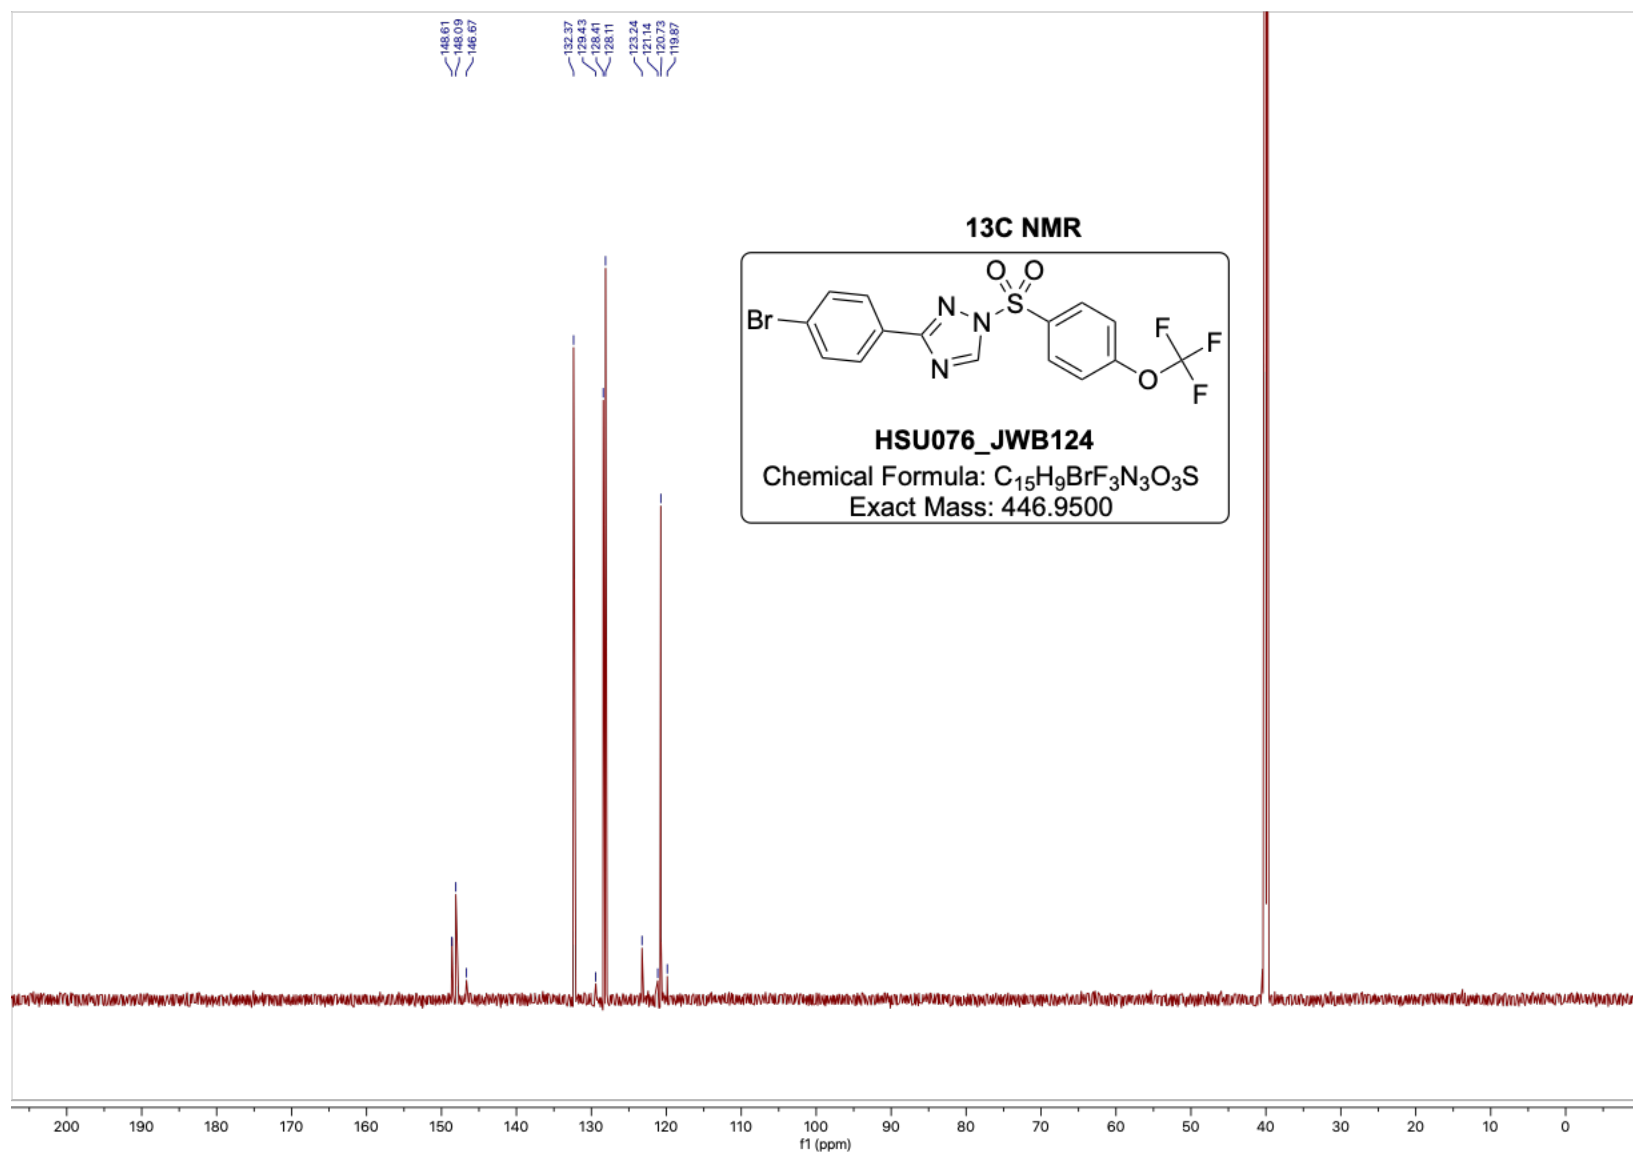

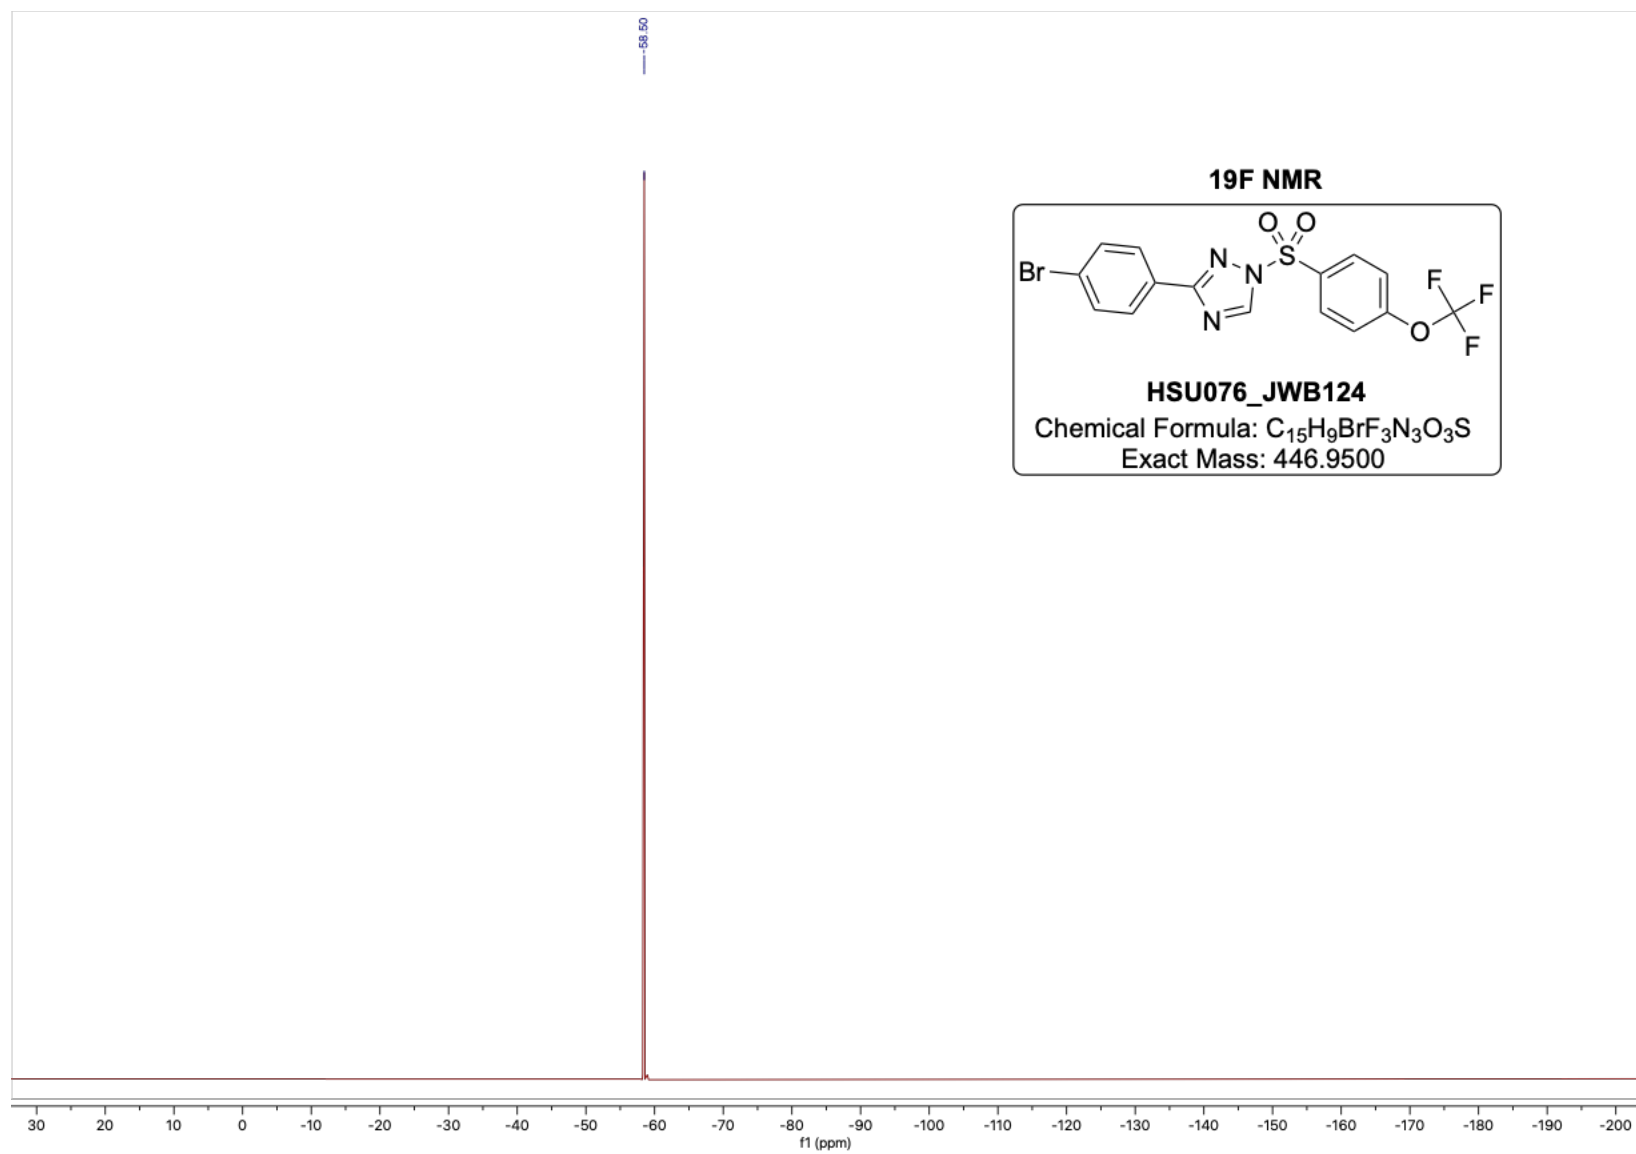

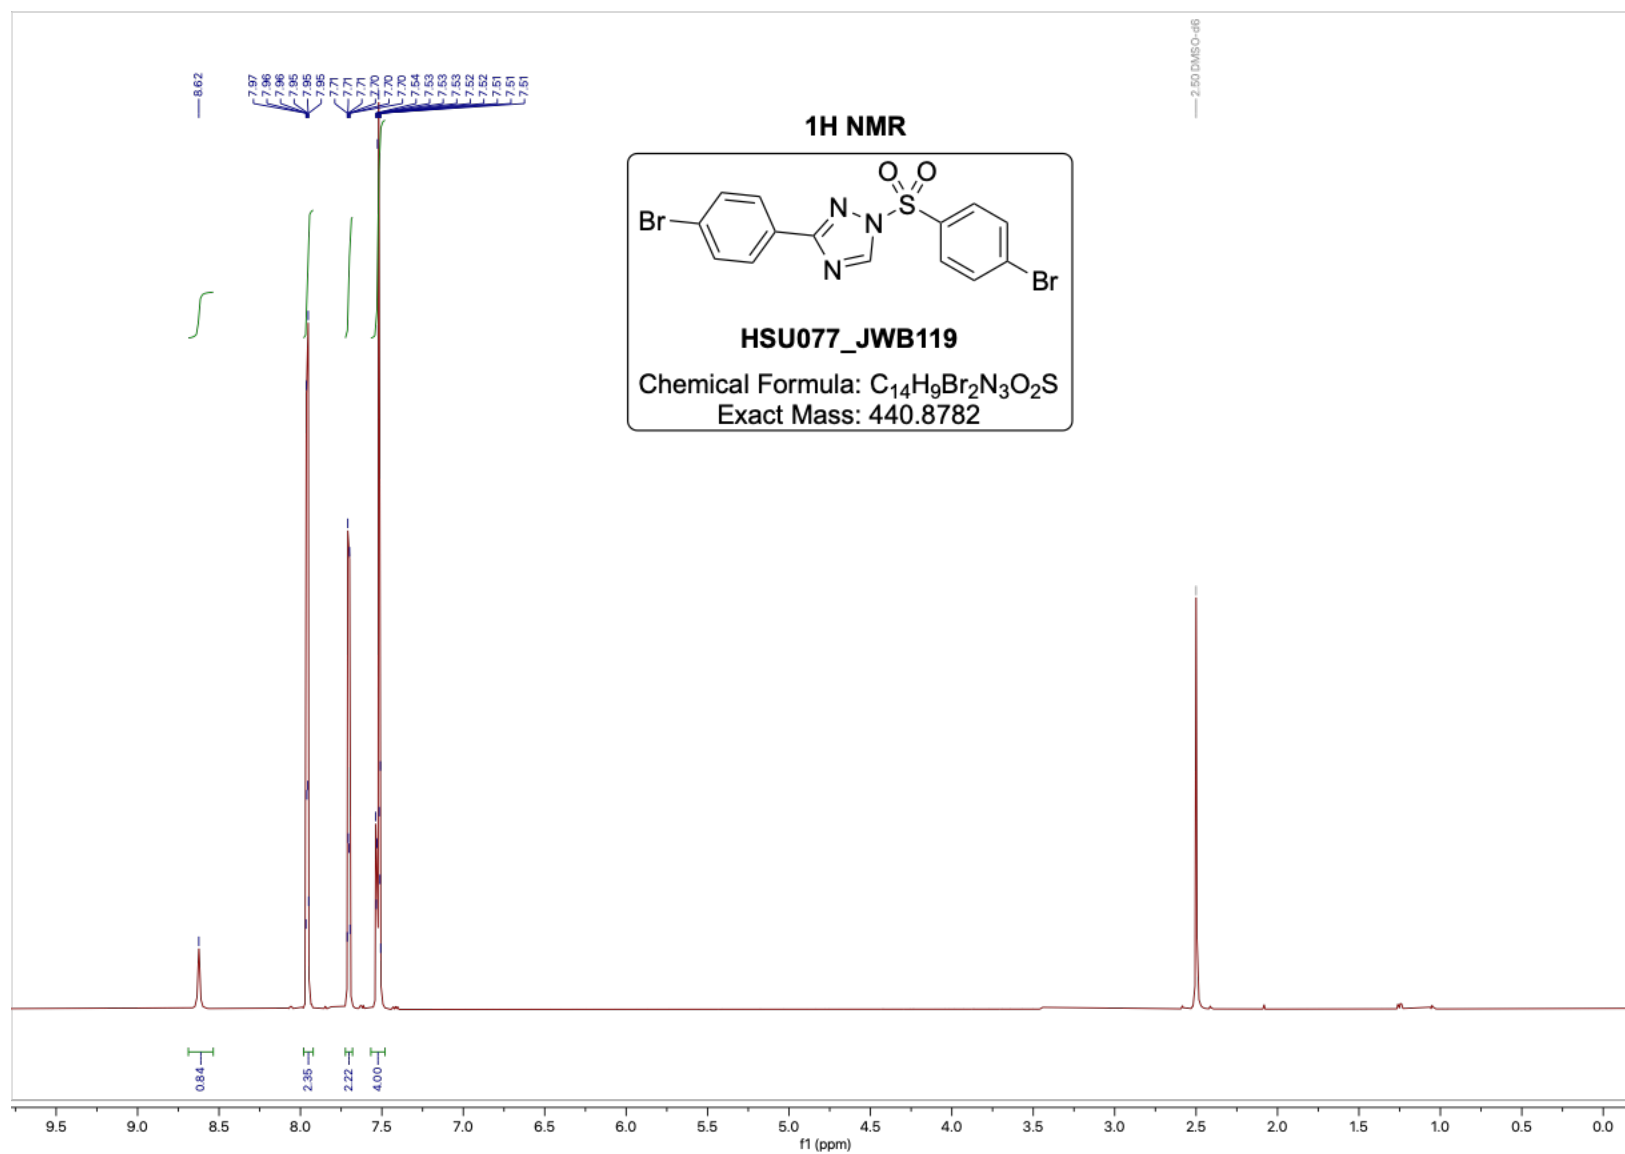



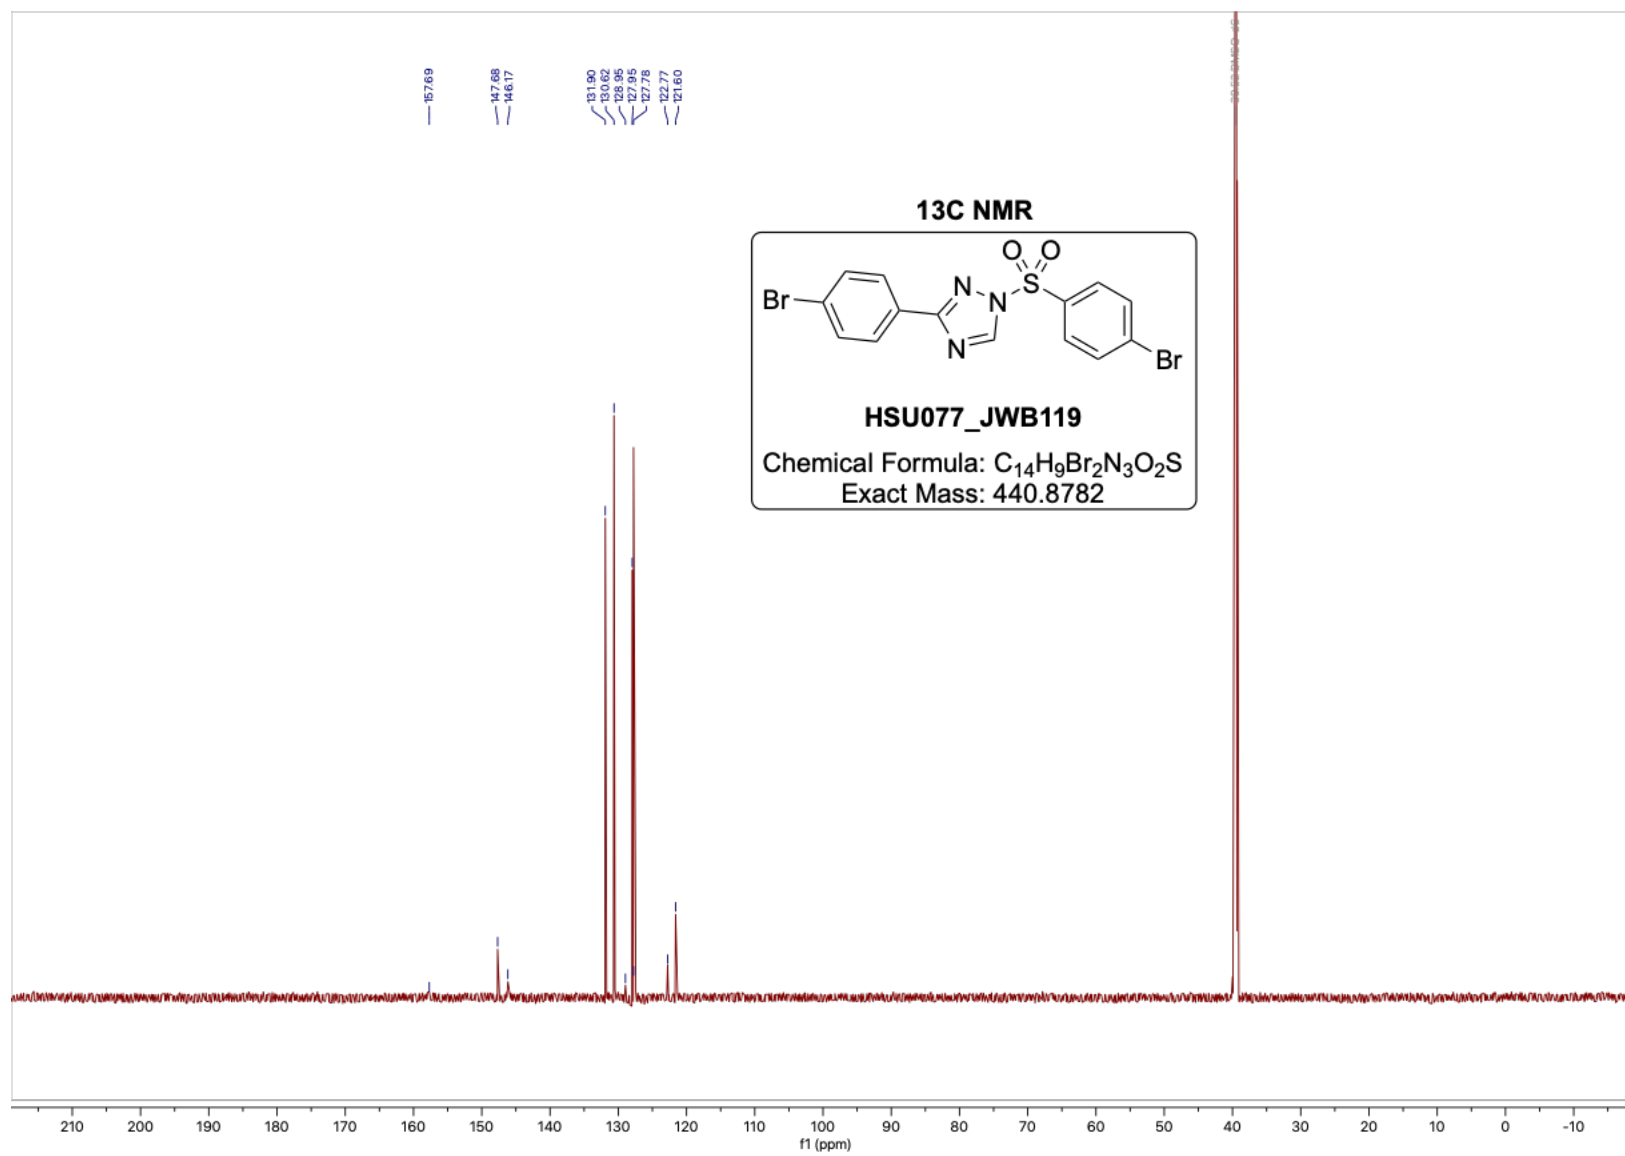

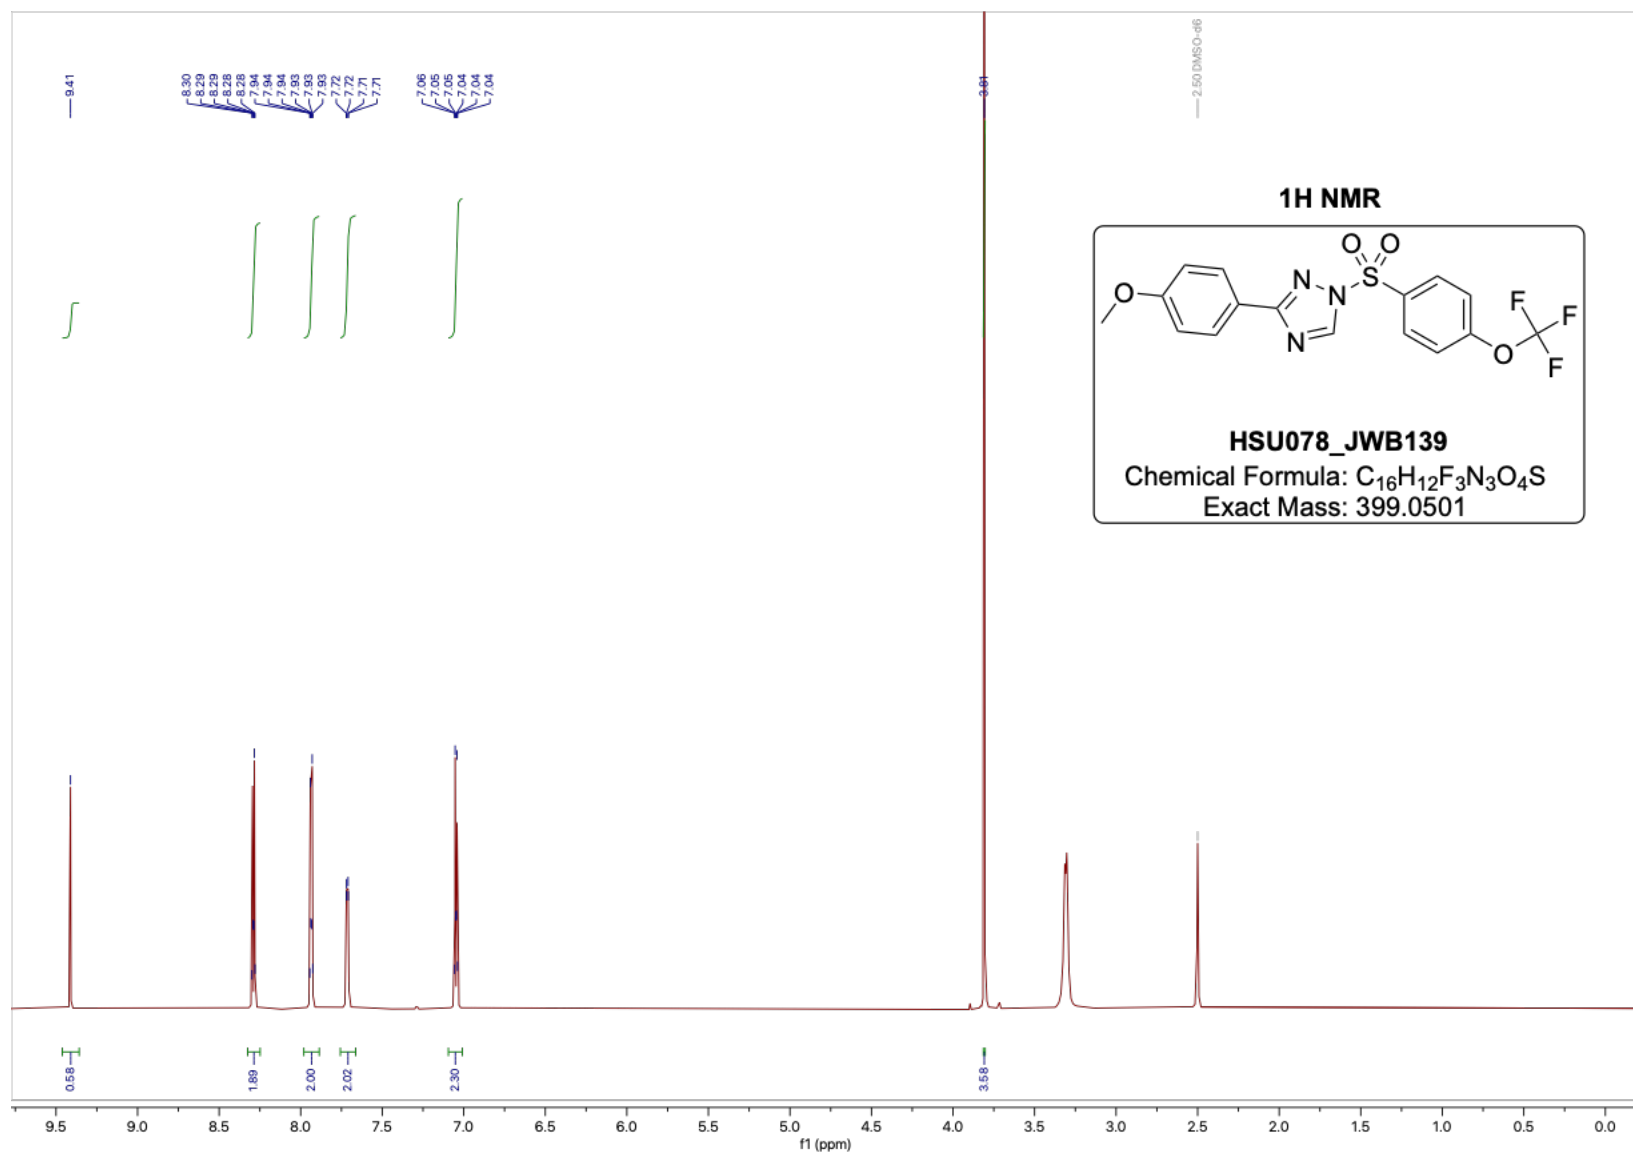

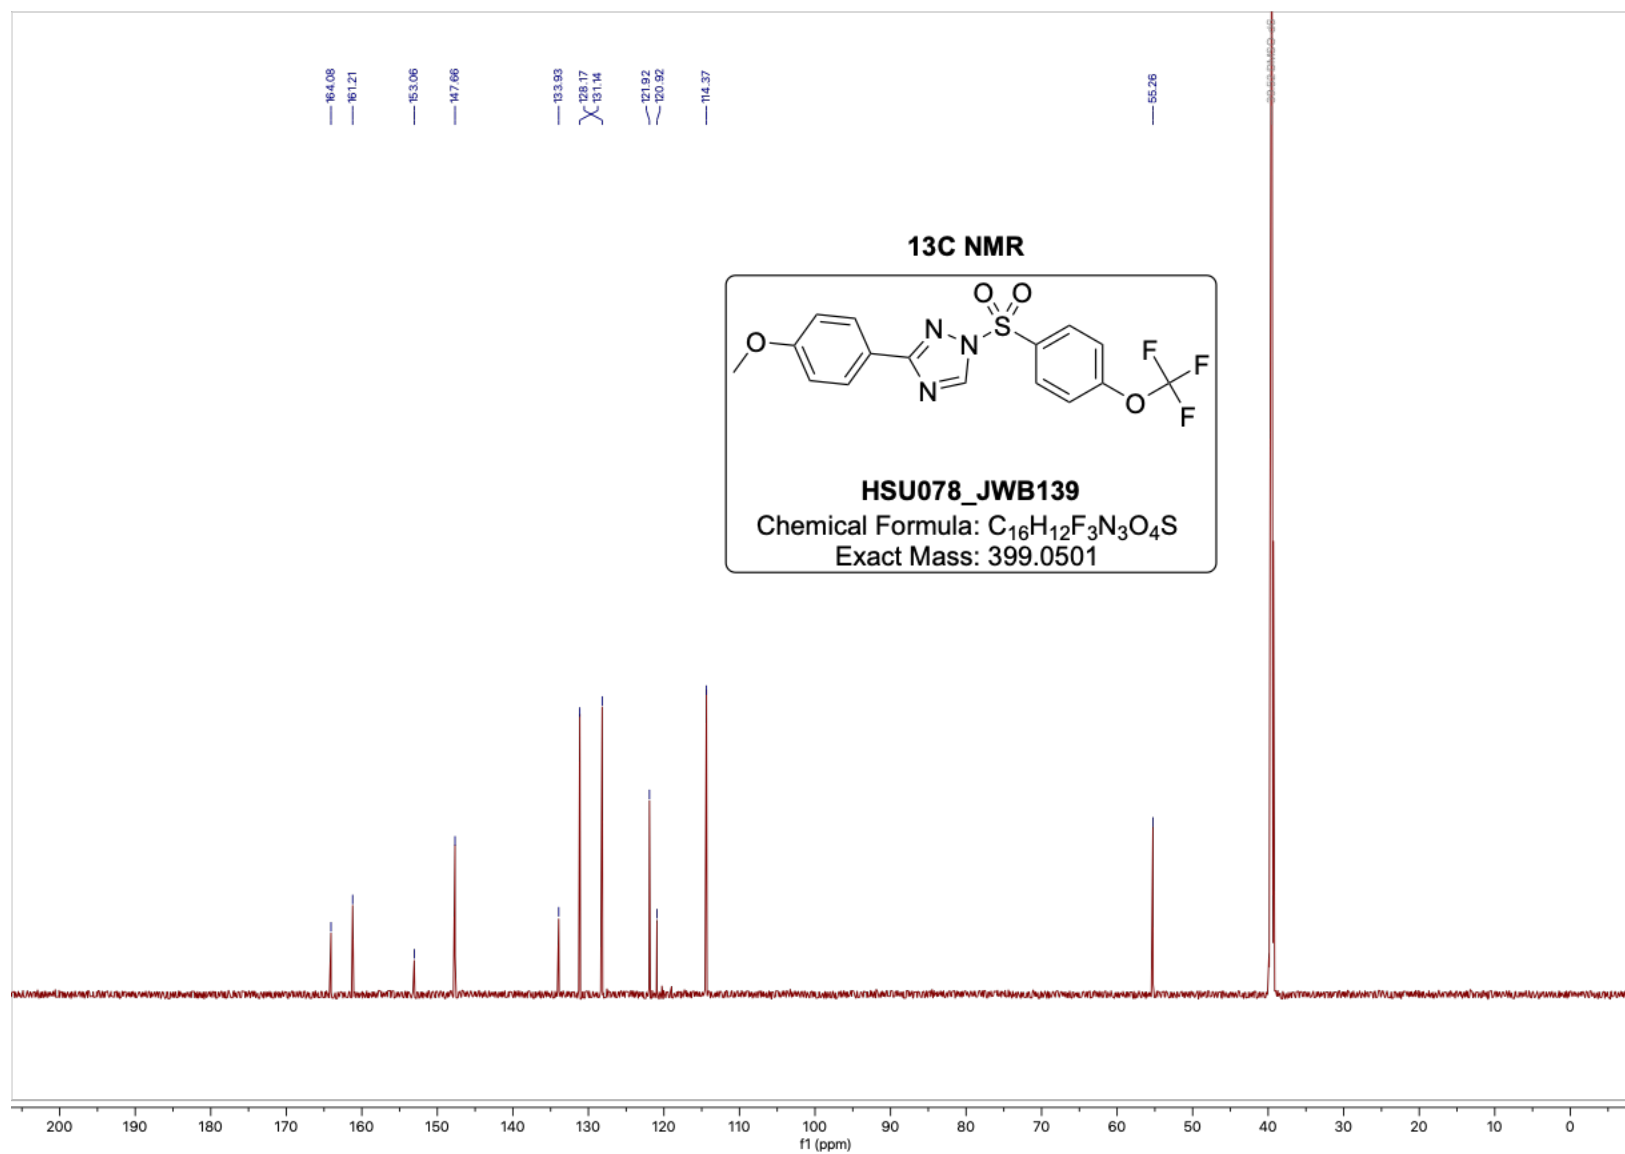

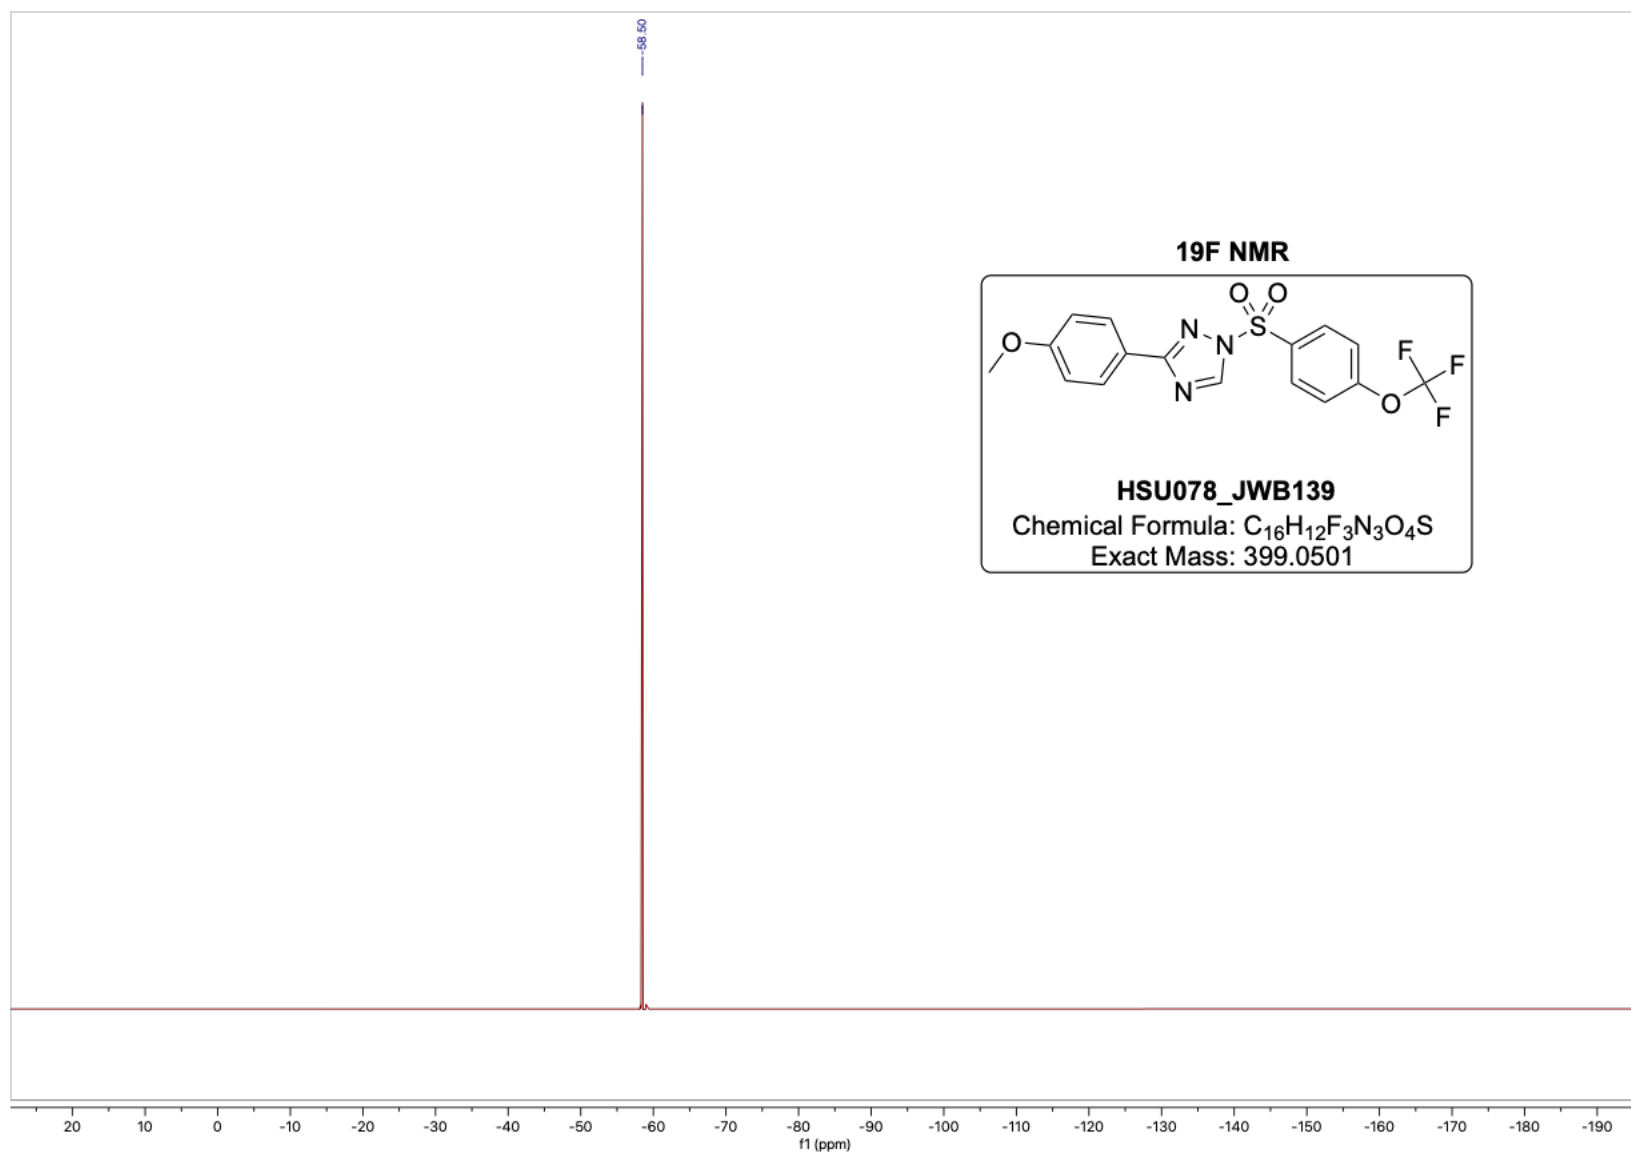

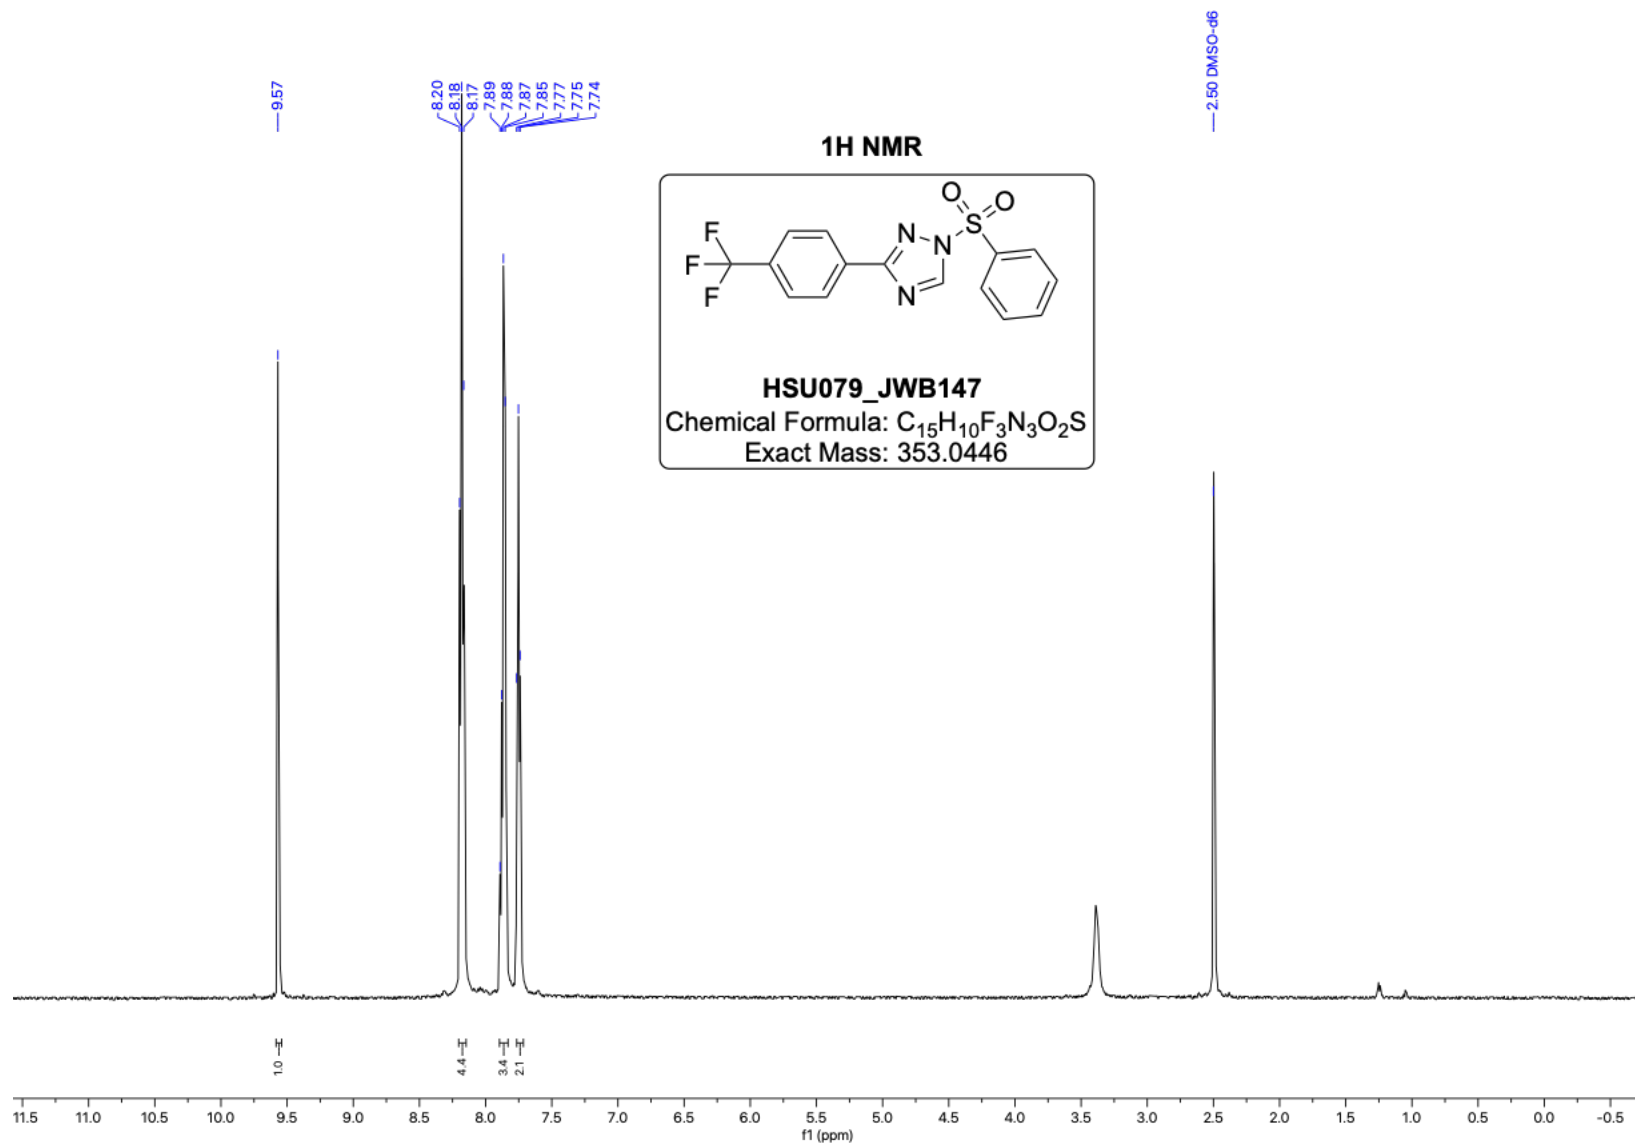

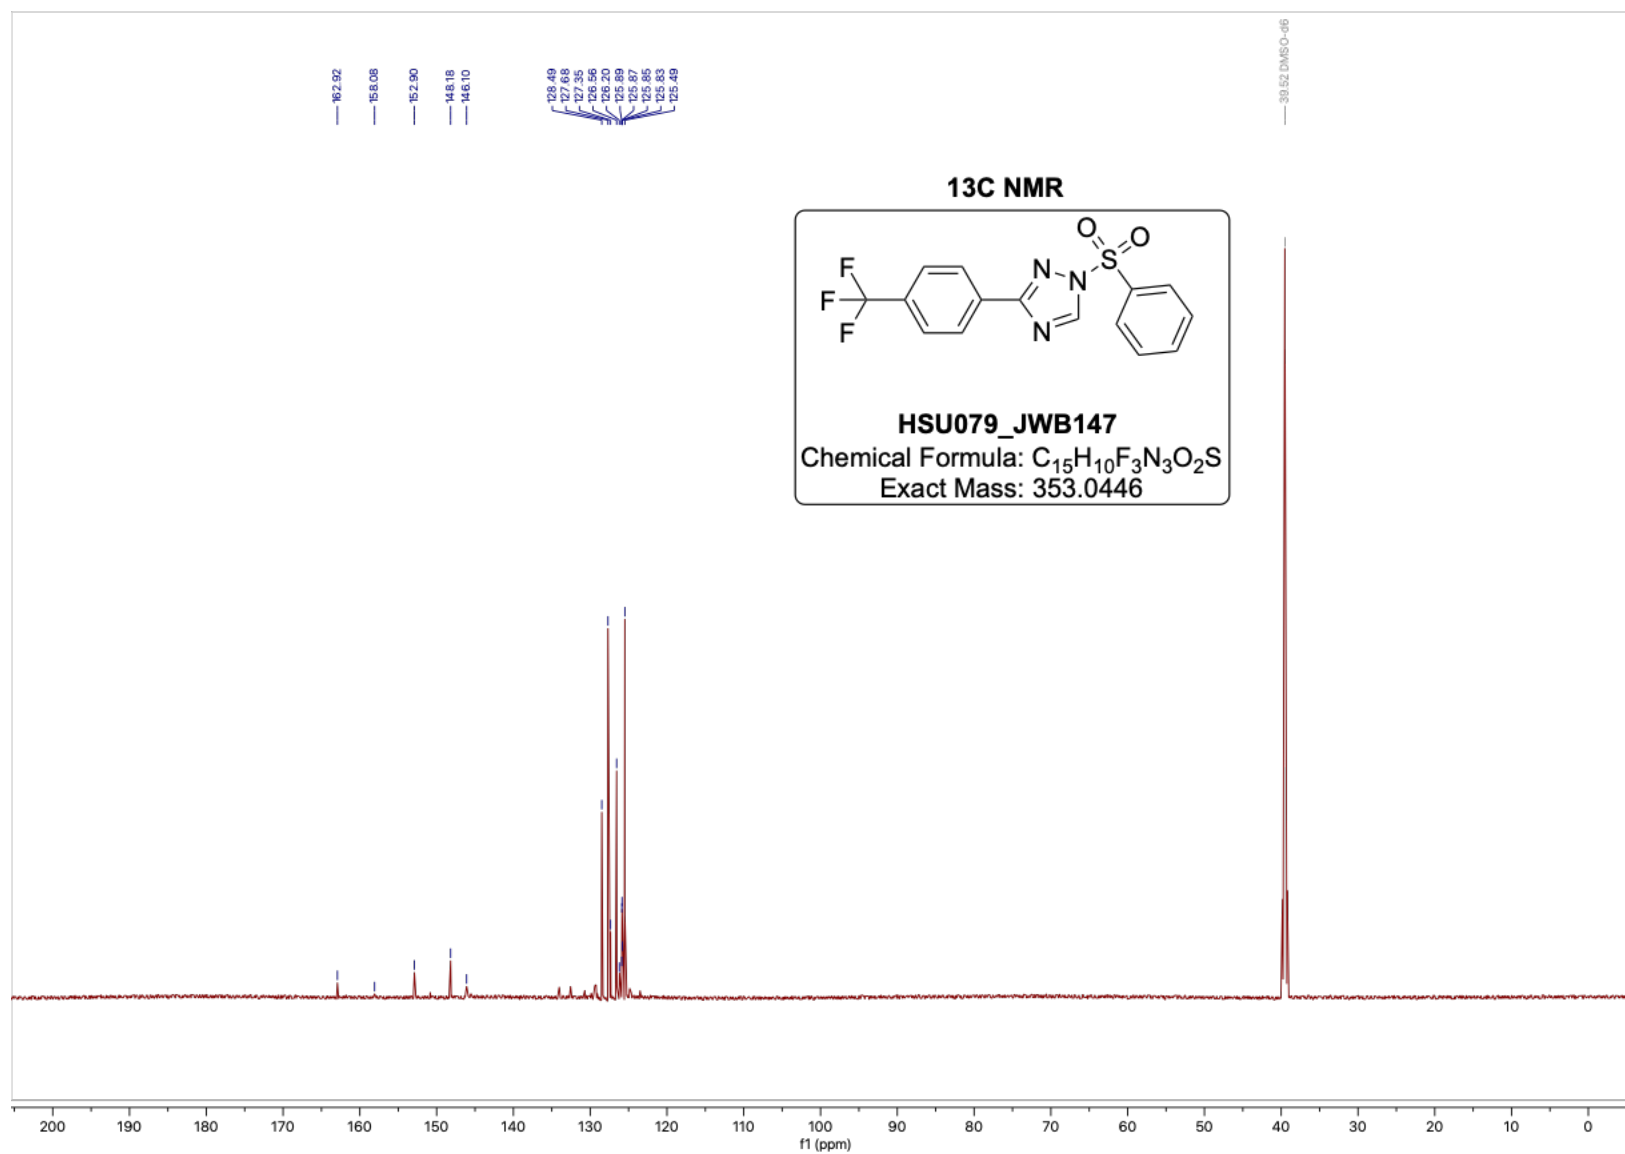

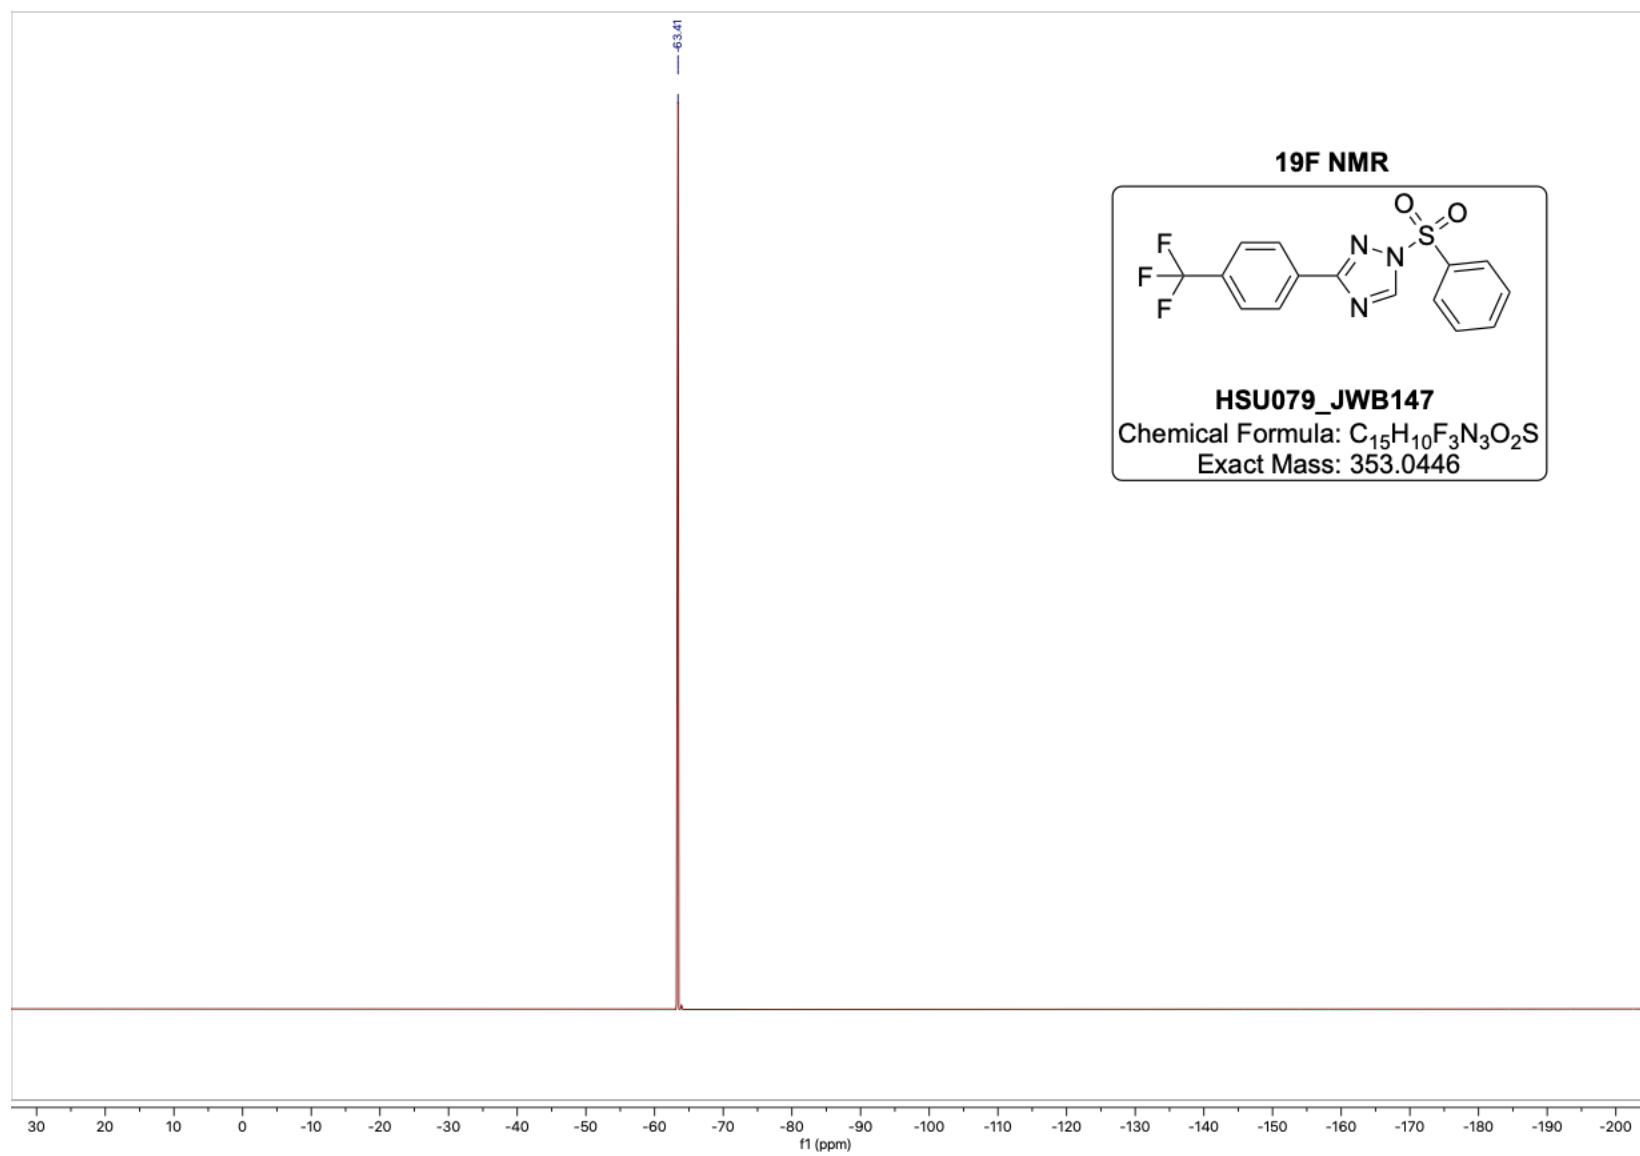

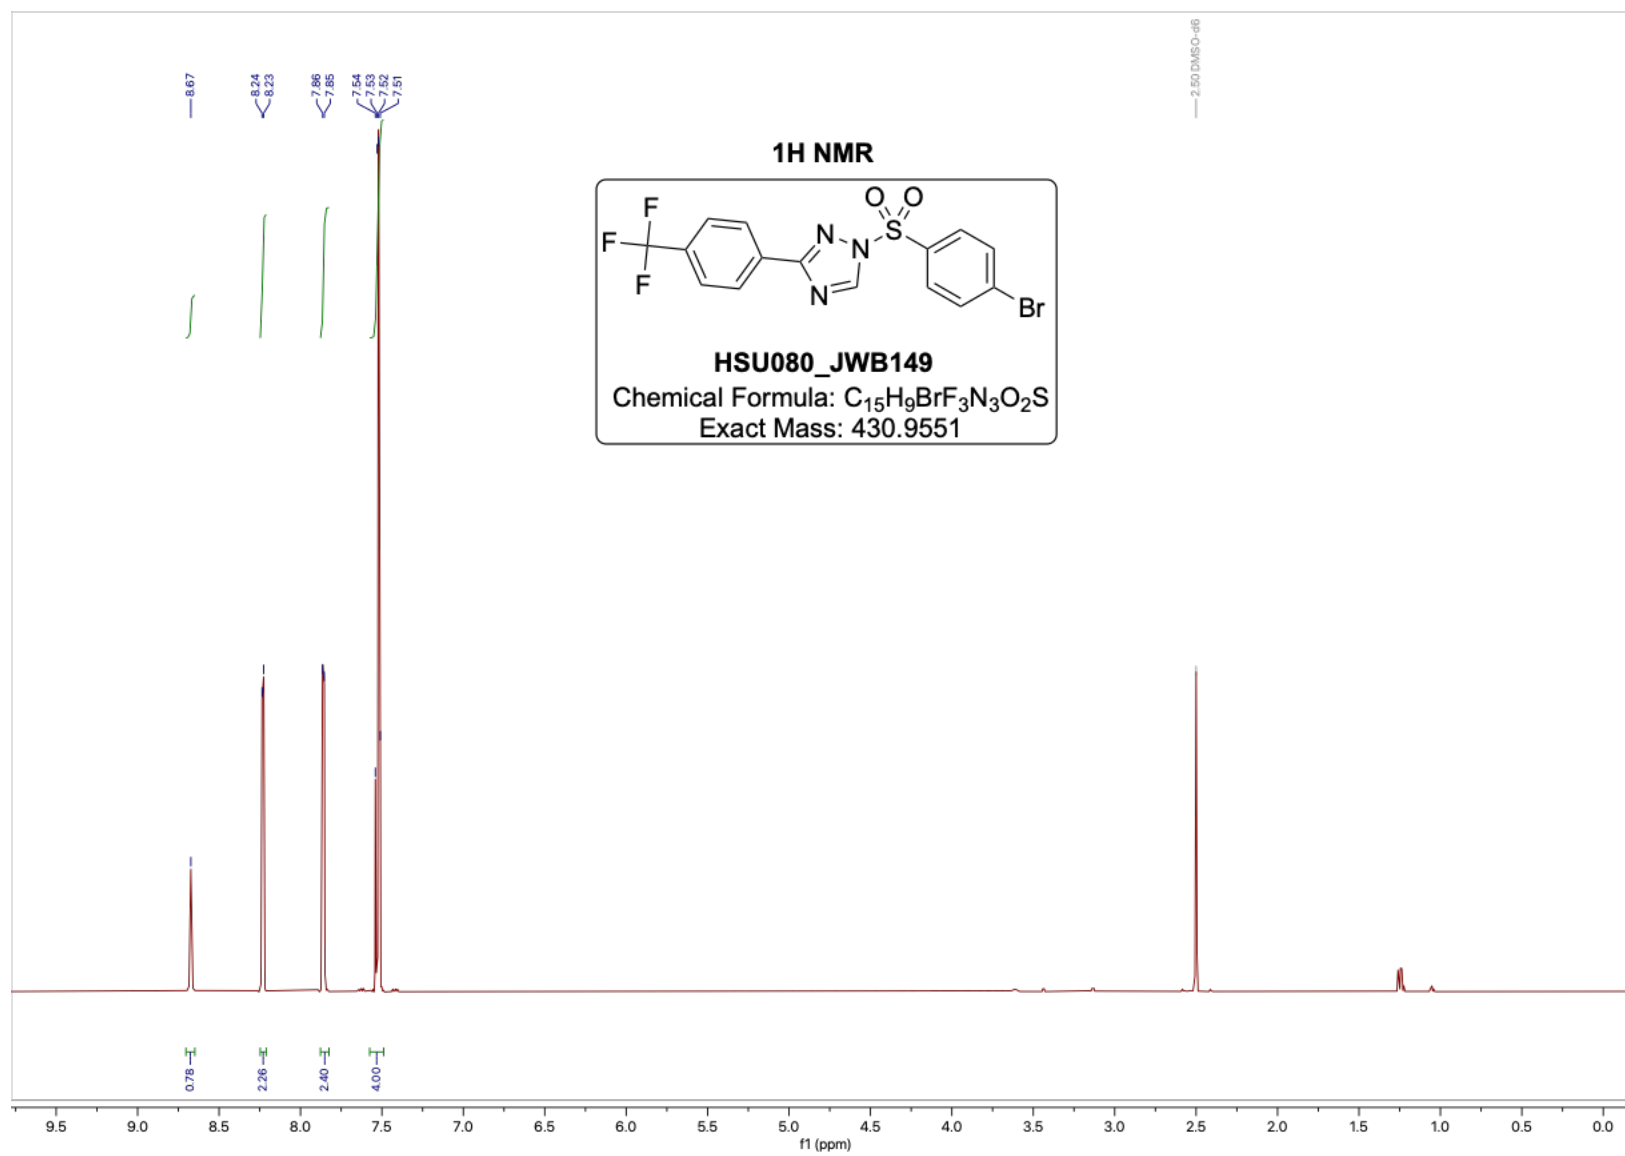



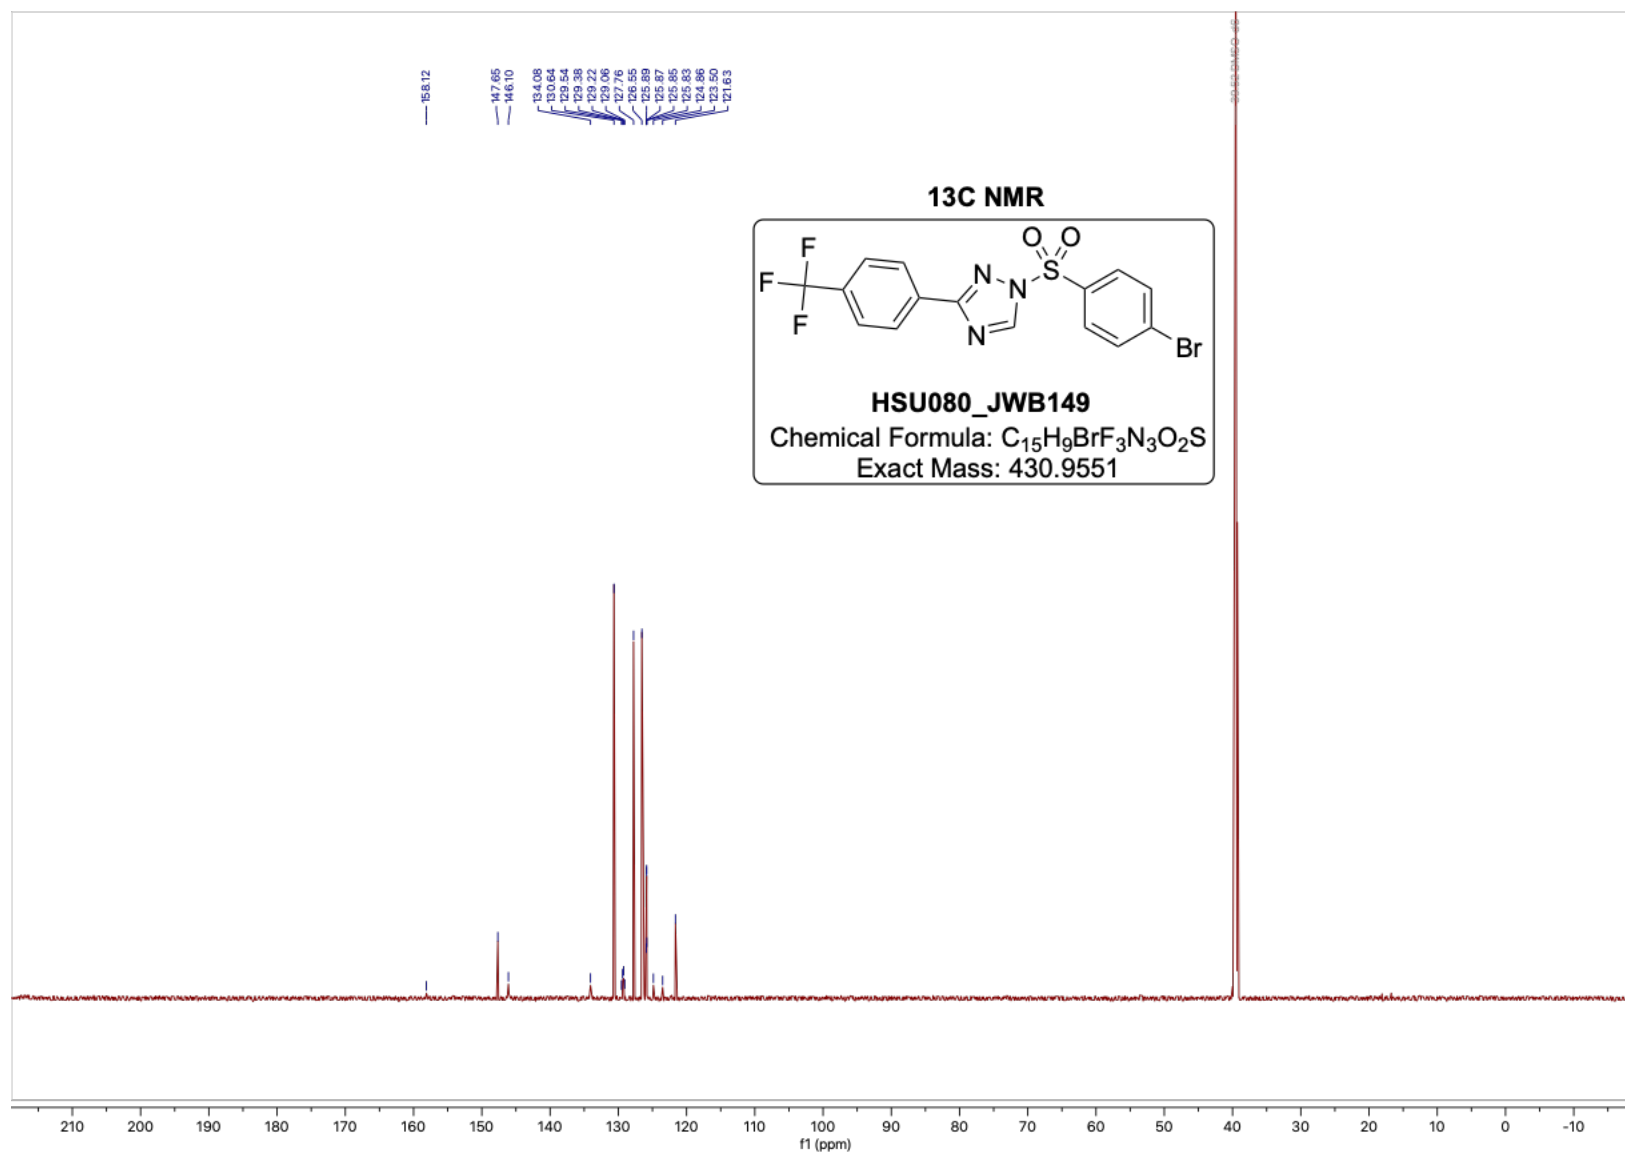

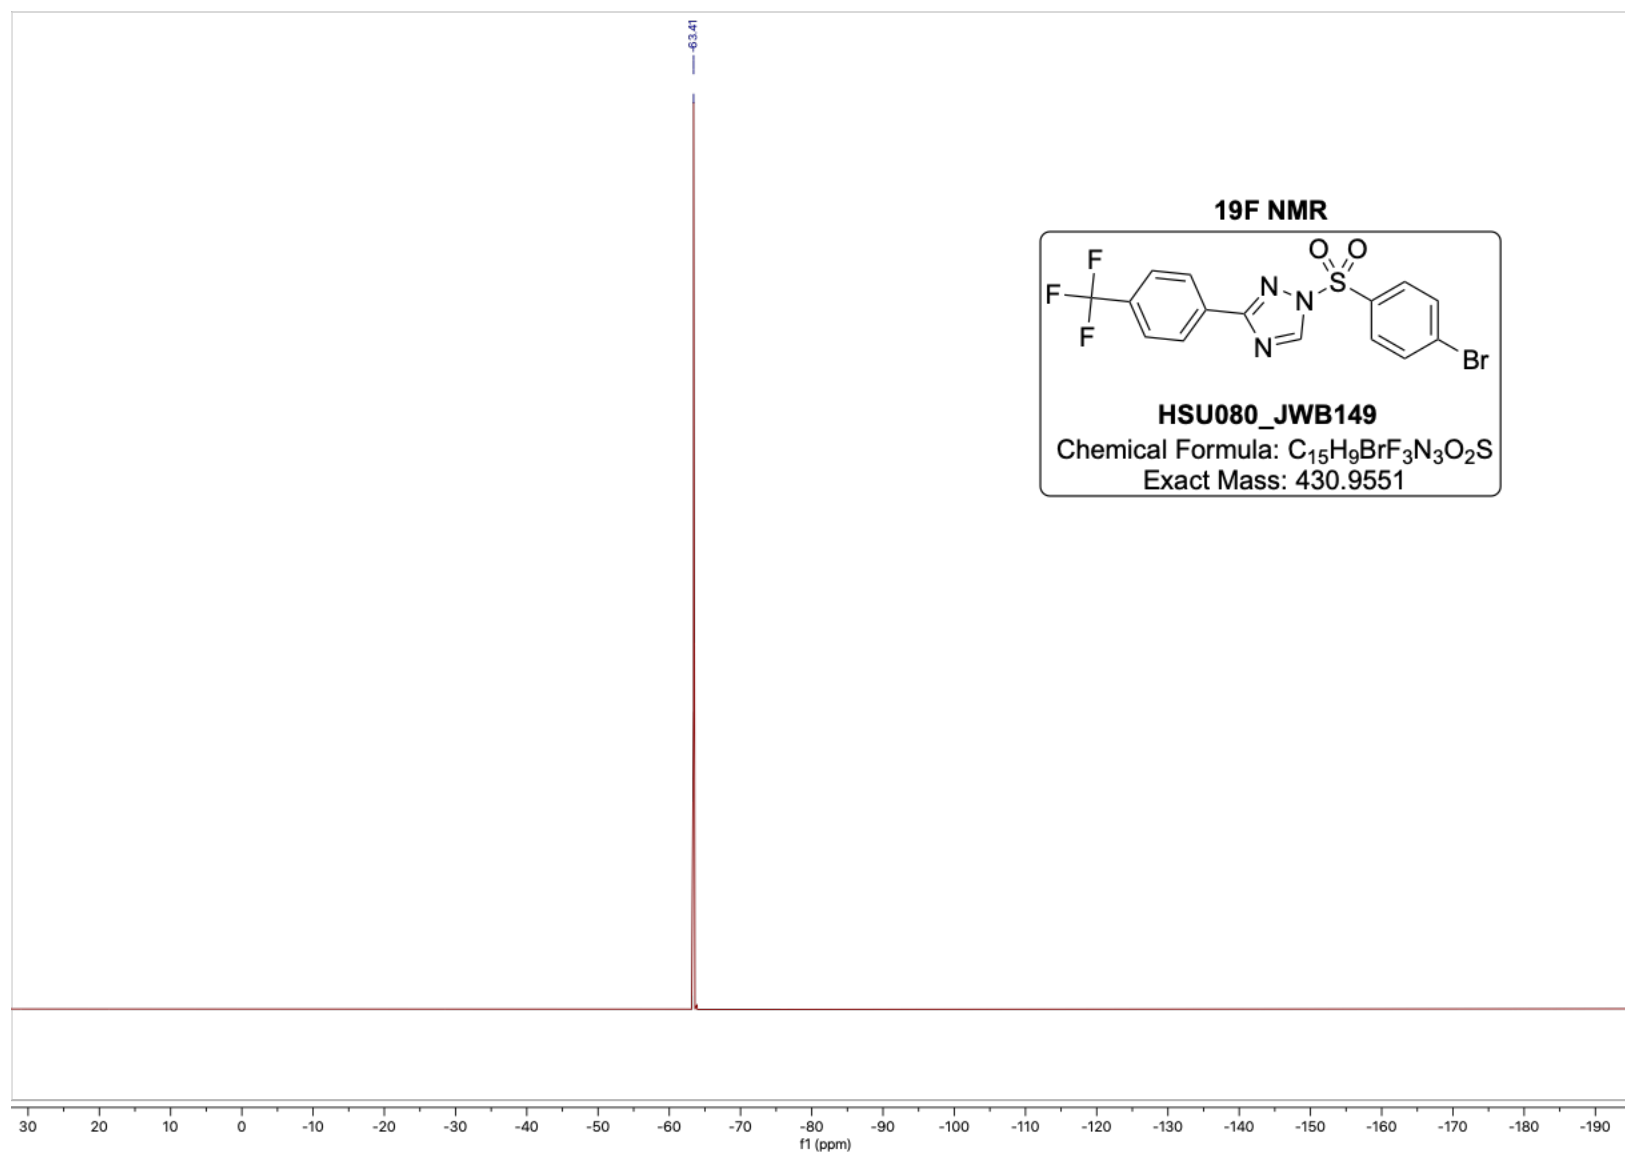

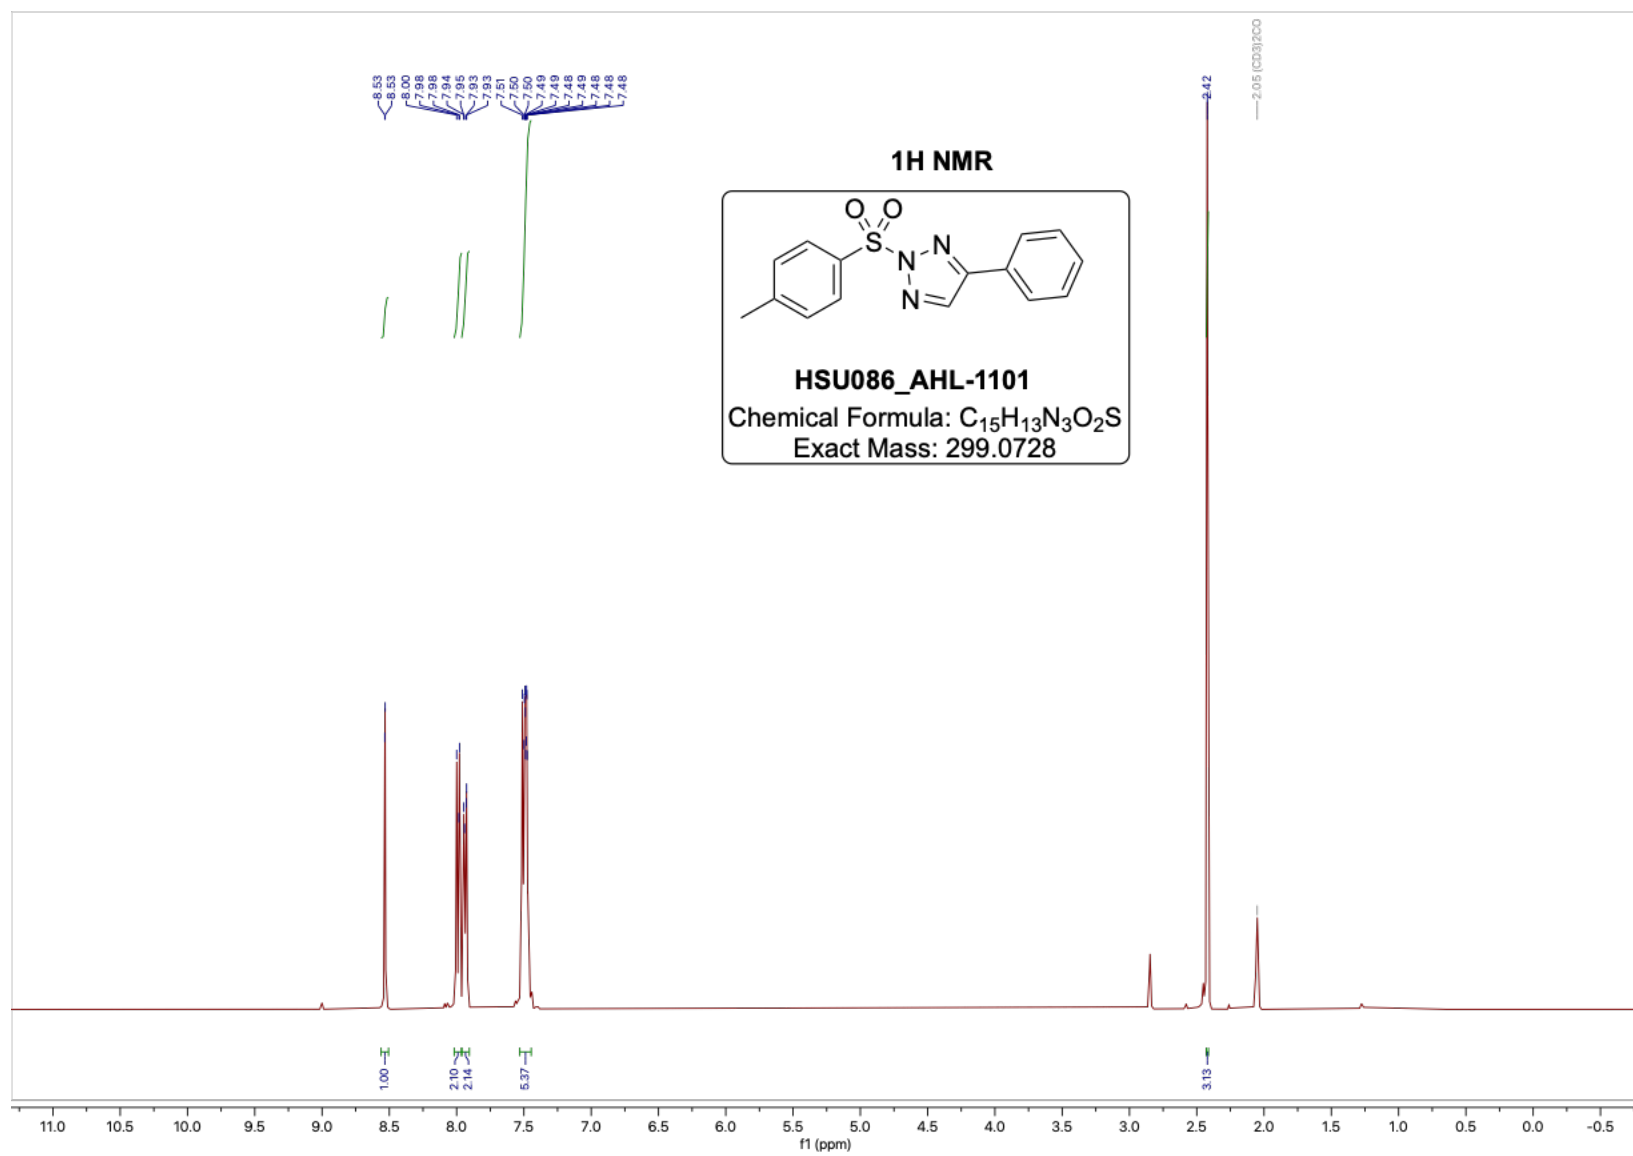

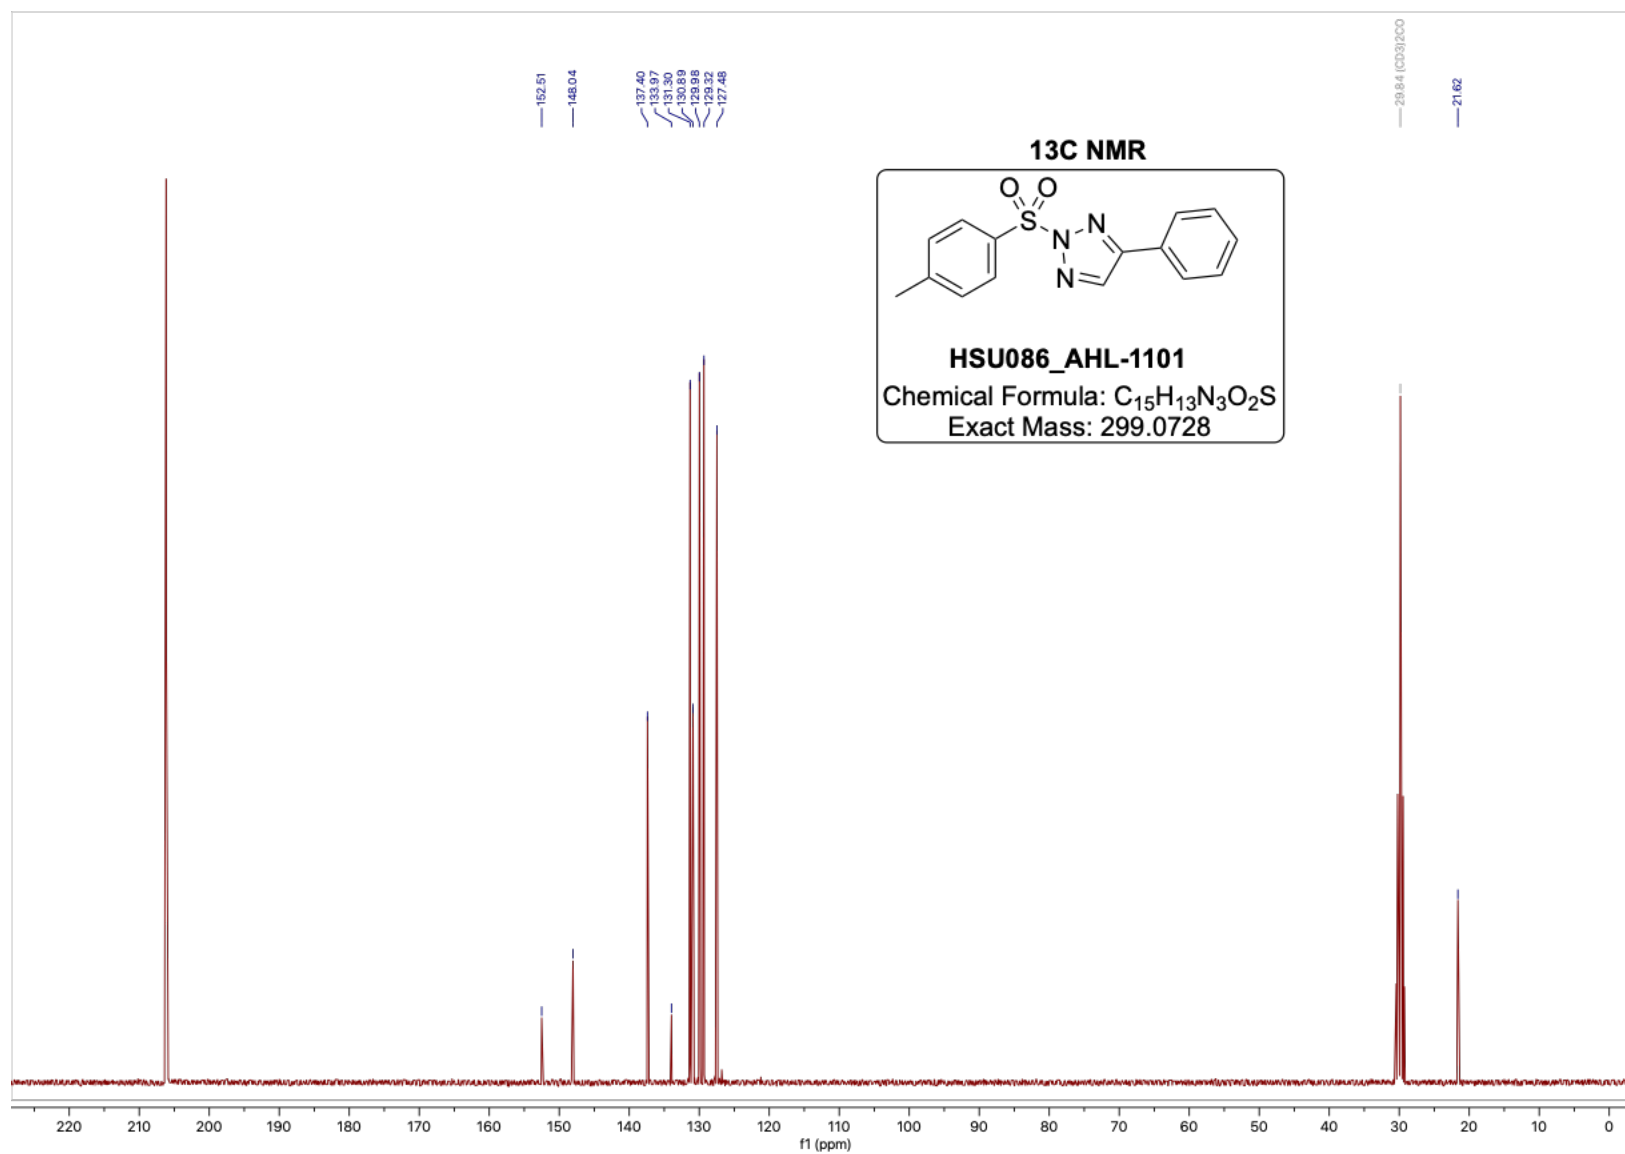

# <sup>1</sup>H NMR

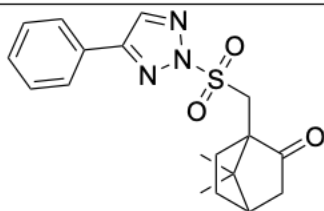

**HSU087\_AHL1118**  
Chemical Formula: C<sub>18</sub>H<sub>21</sub>N<sub>3</sub>O<sub>3</sub>S  
Exact Mass: 359.1304

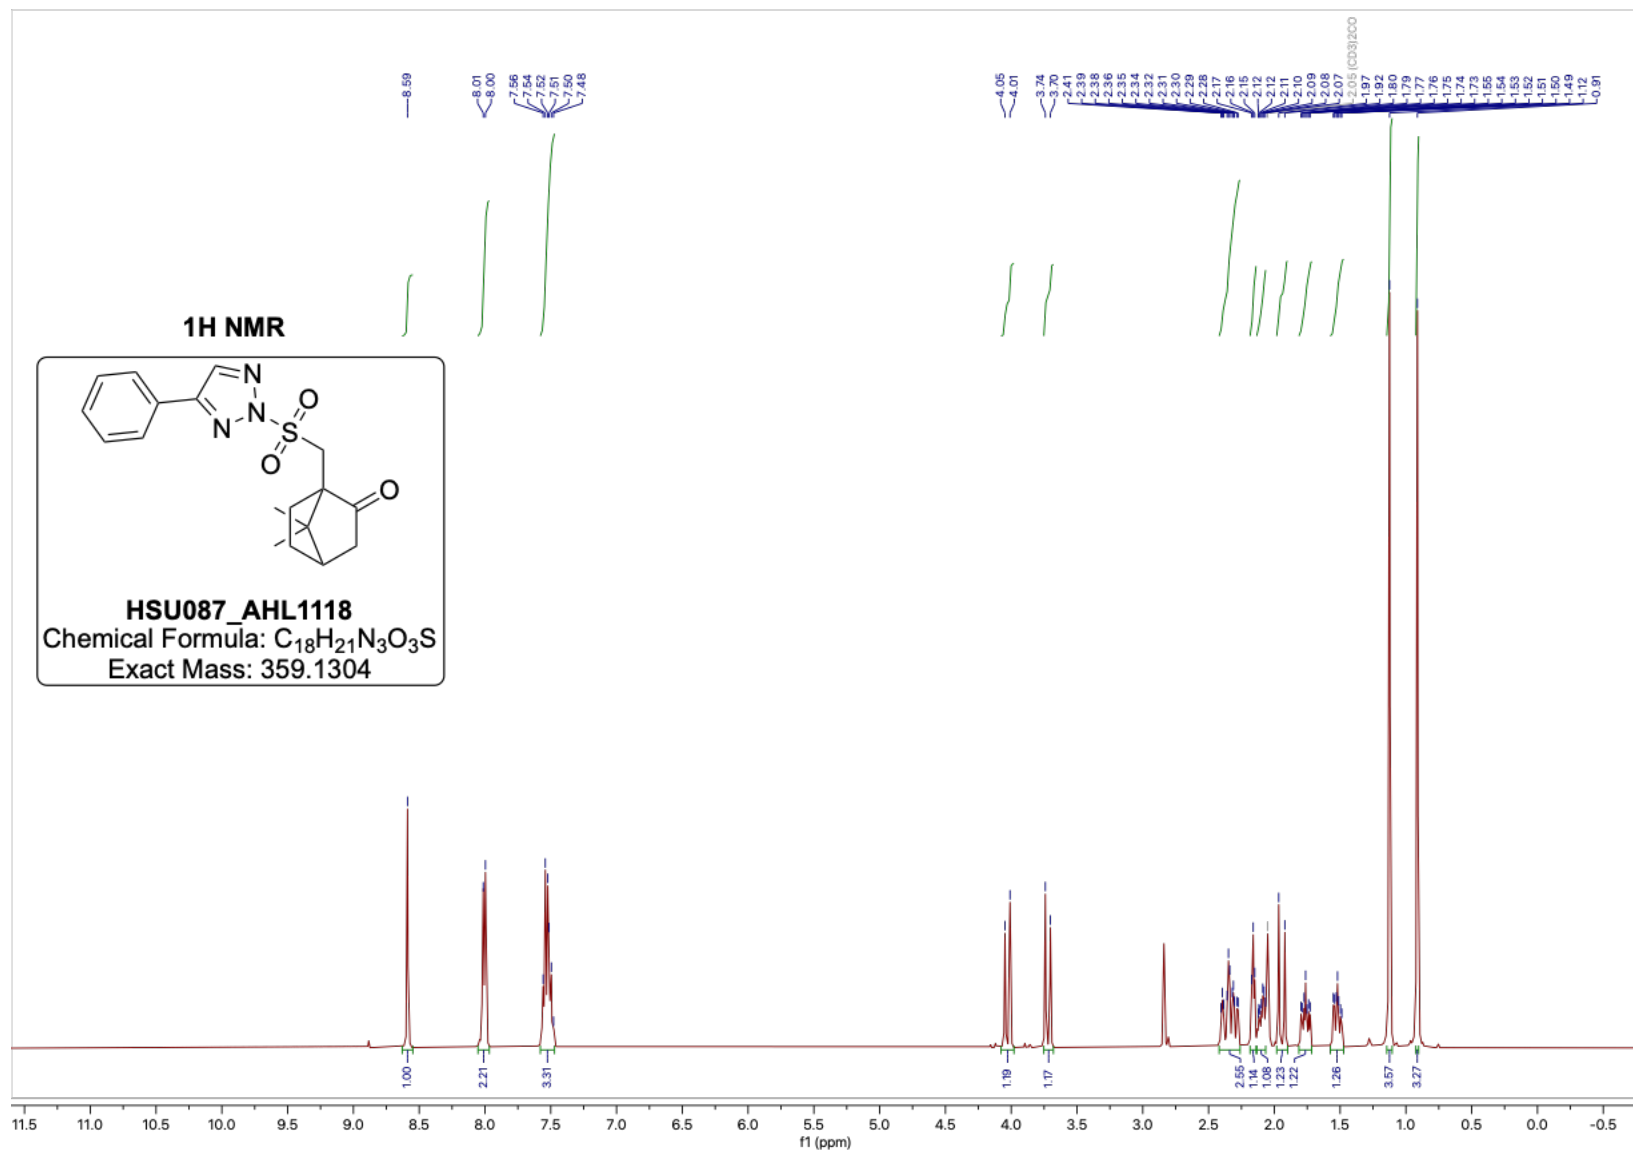

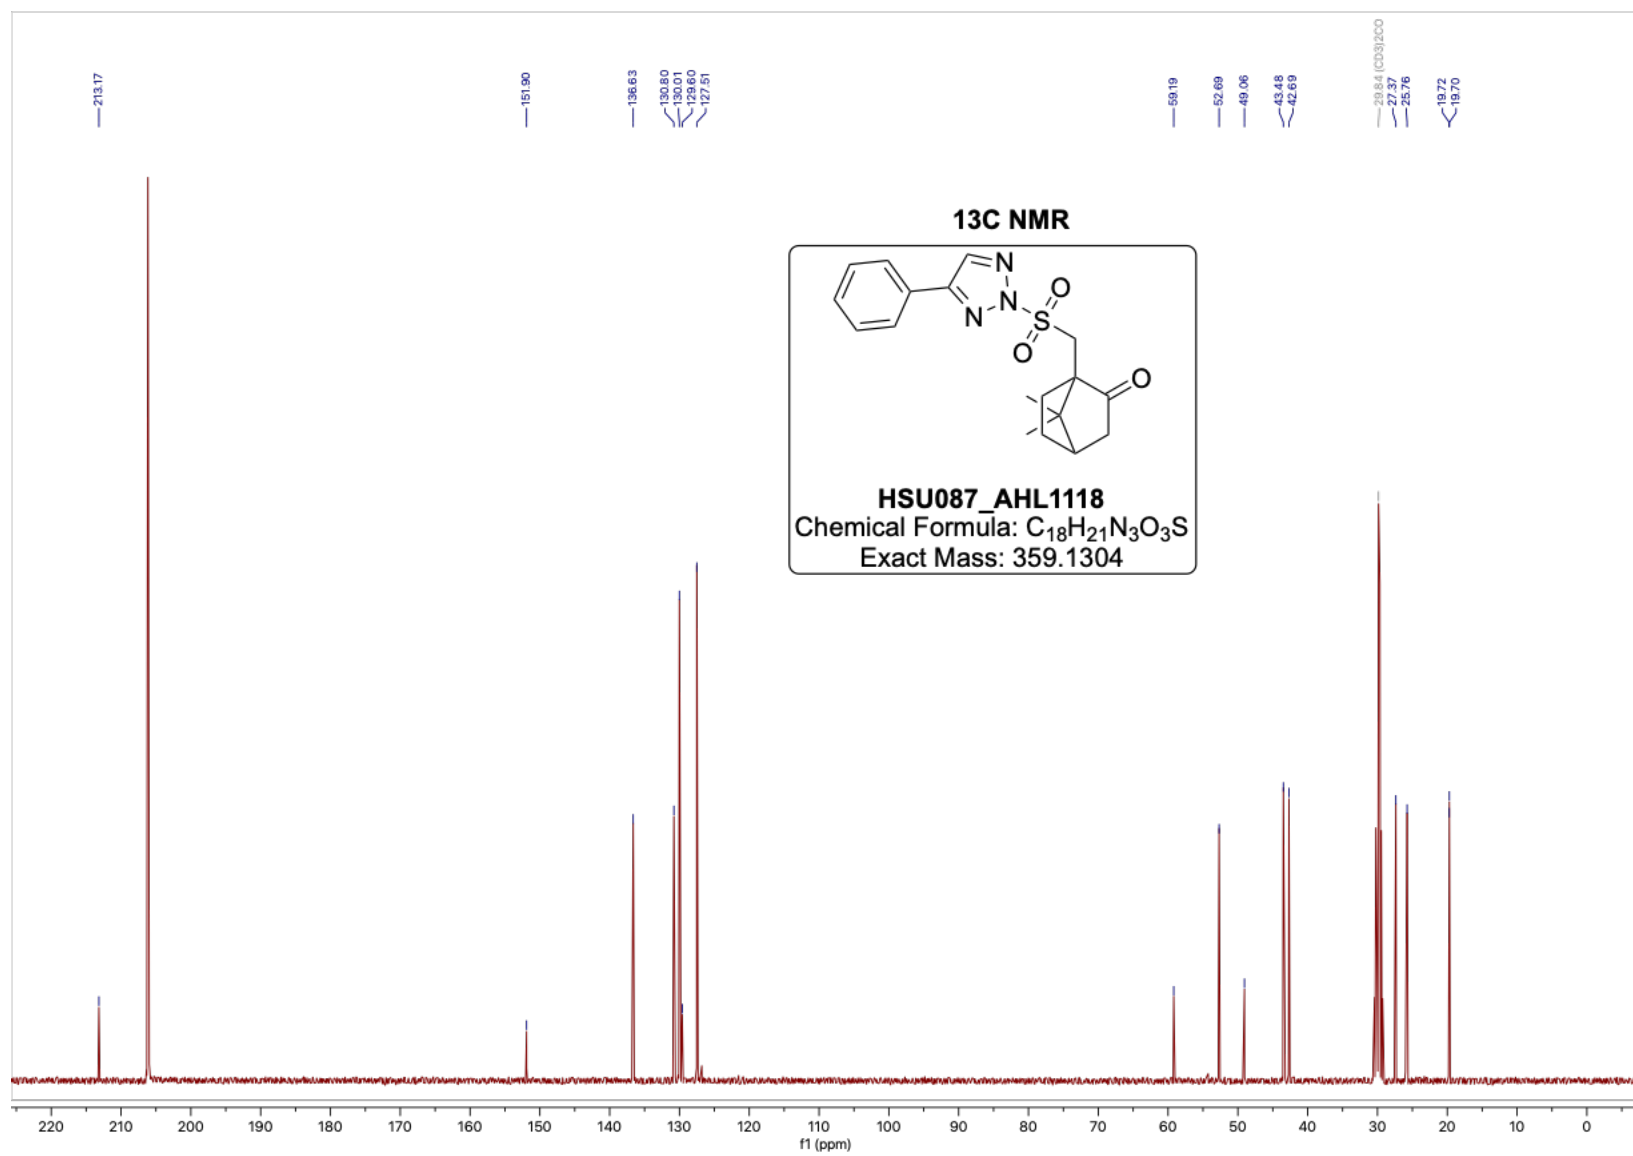

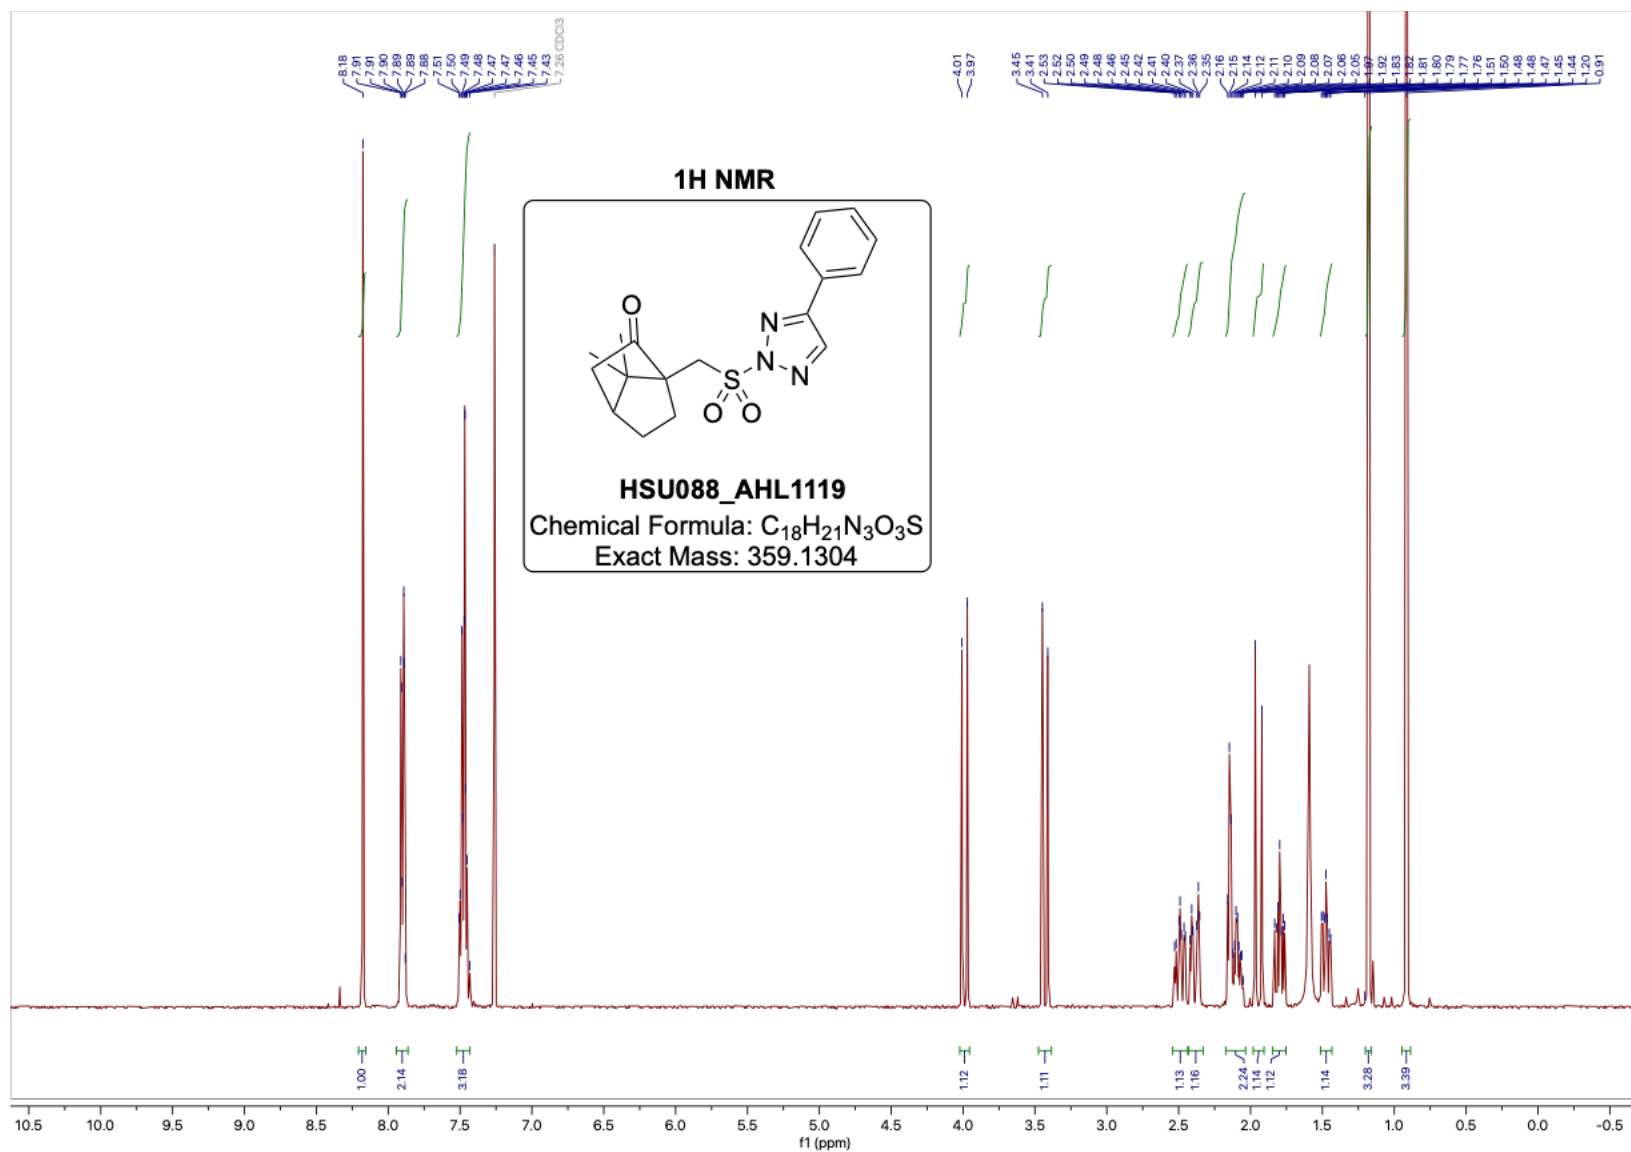

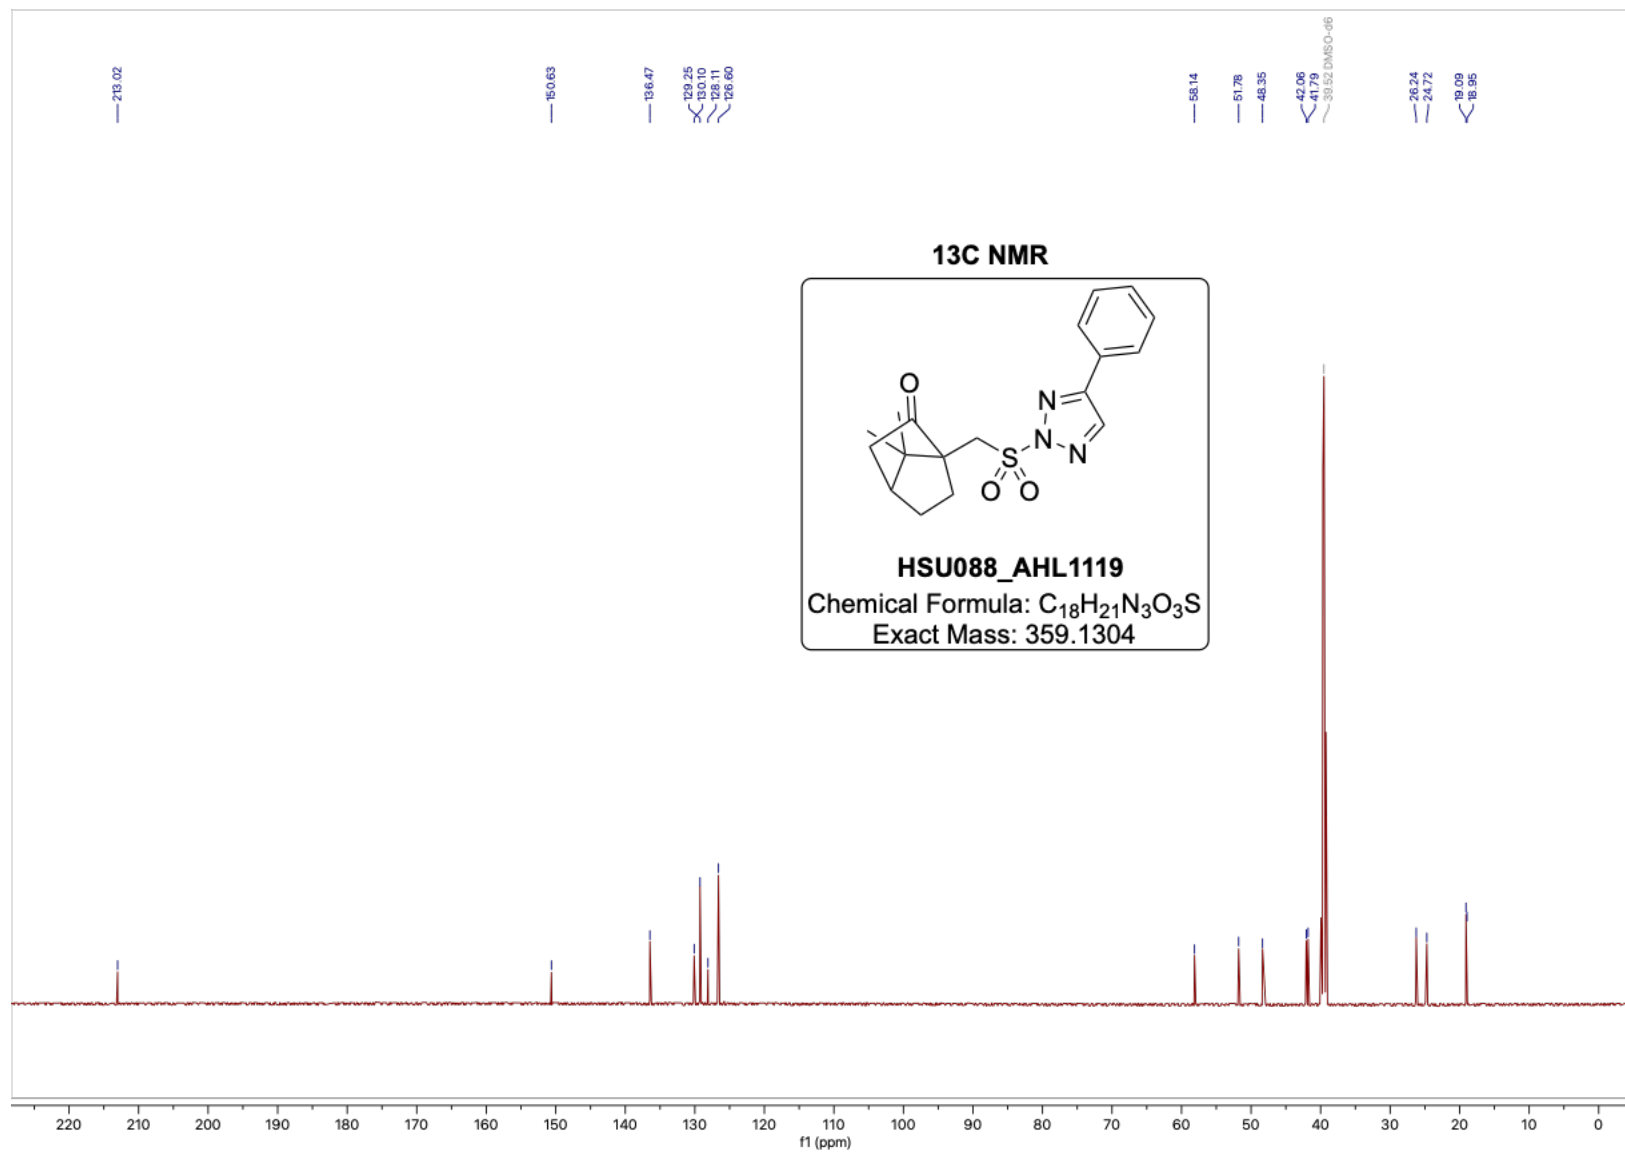



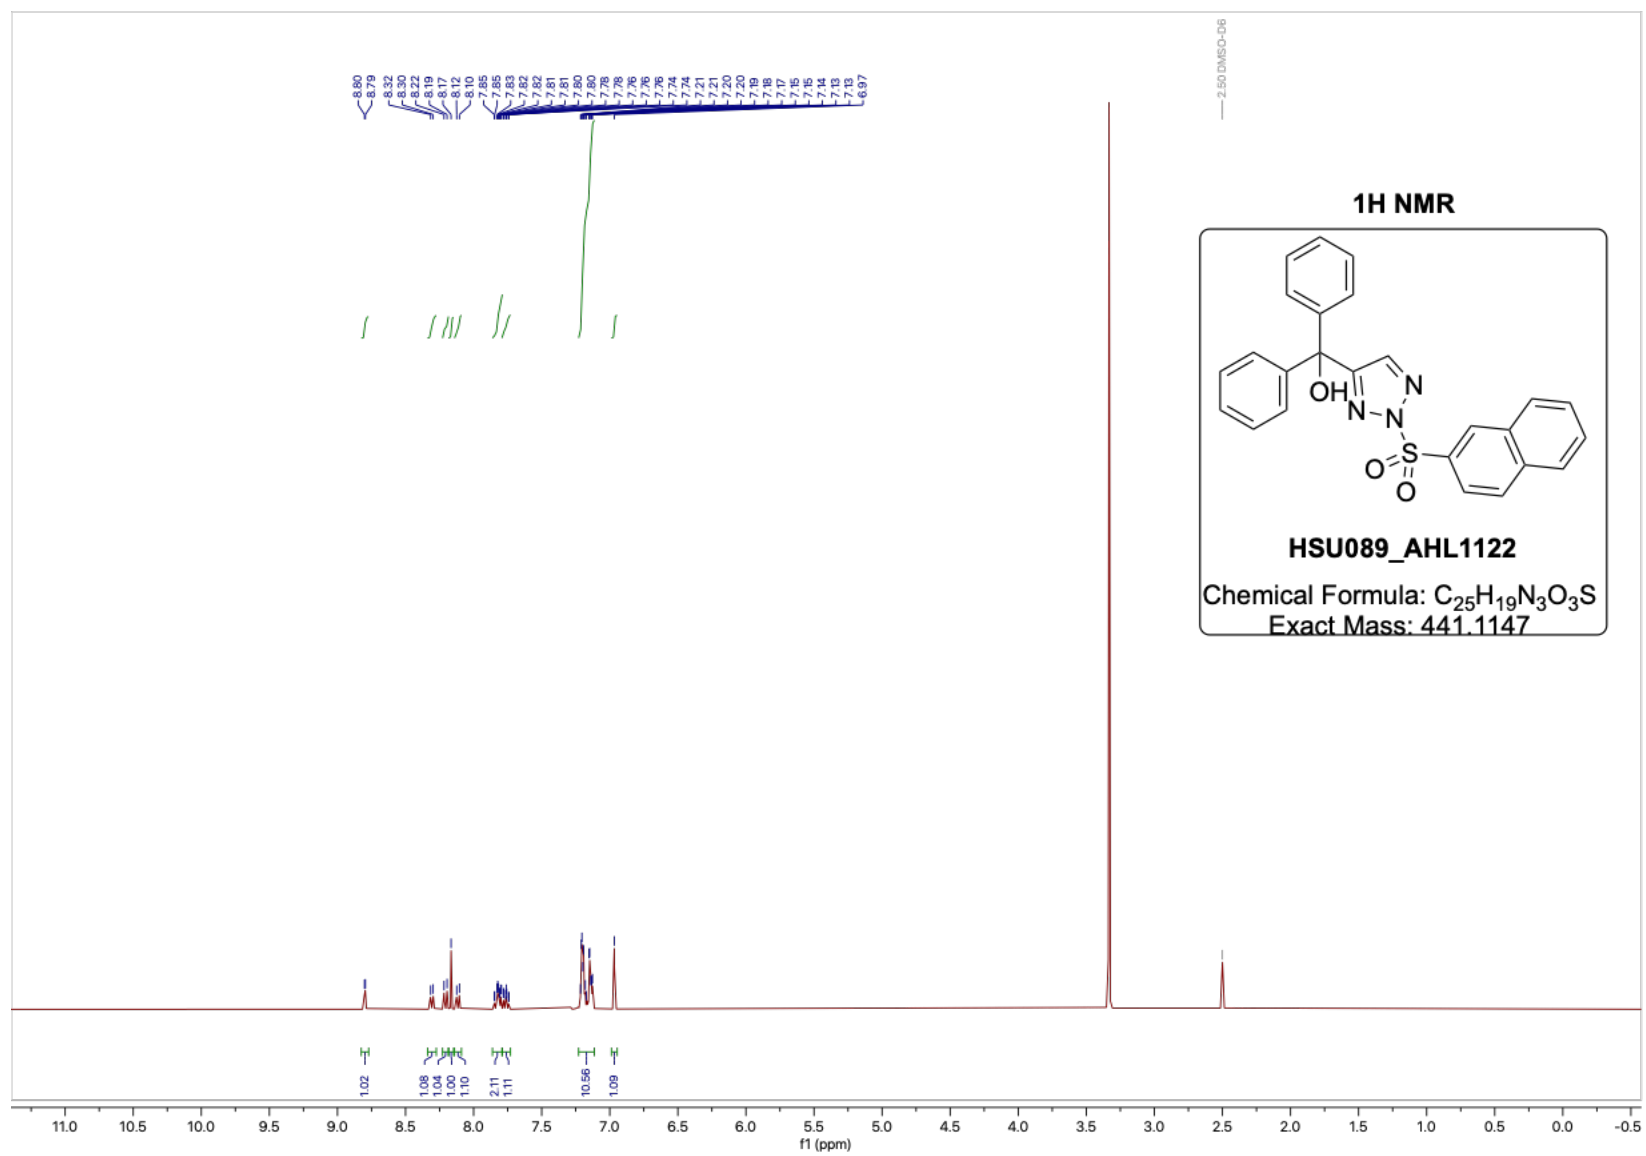

# **<sup>13</sup>C NMR**

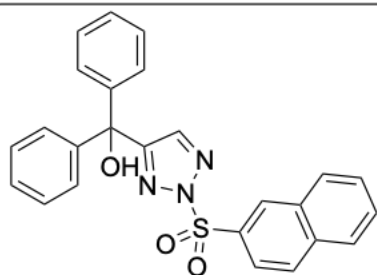

**HSU089\_AHL1122**

Chemical Formula: C<sub>25</sub>H<sub>19</sub>N<sub>3</sub>O<sub>3</sub>S  
Exact Mass: 441.1147

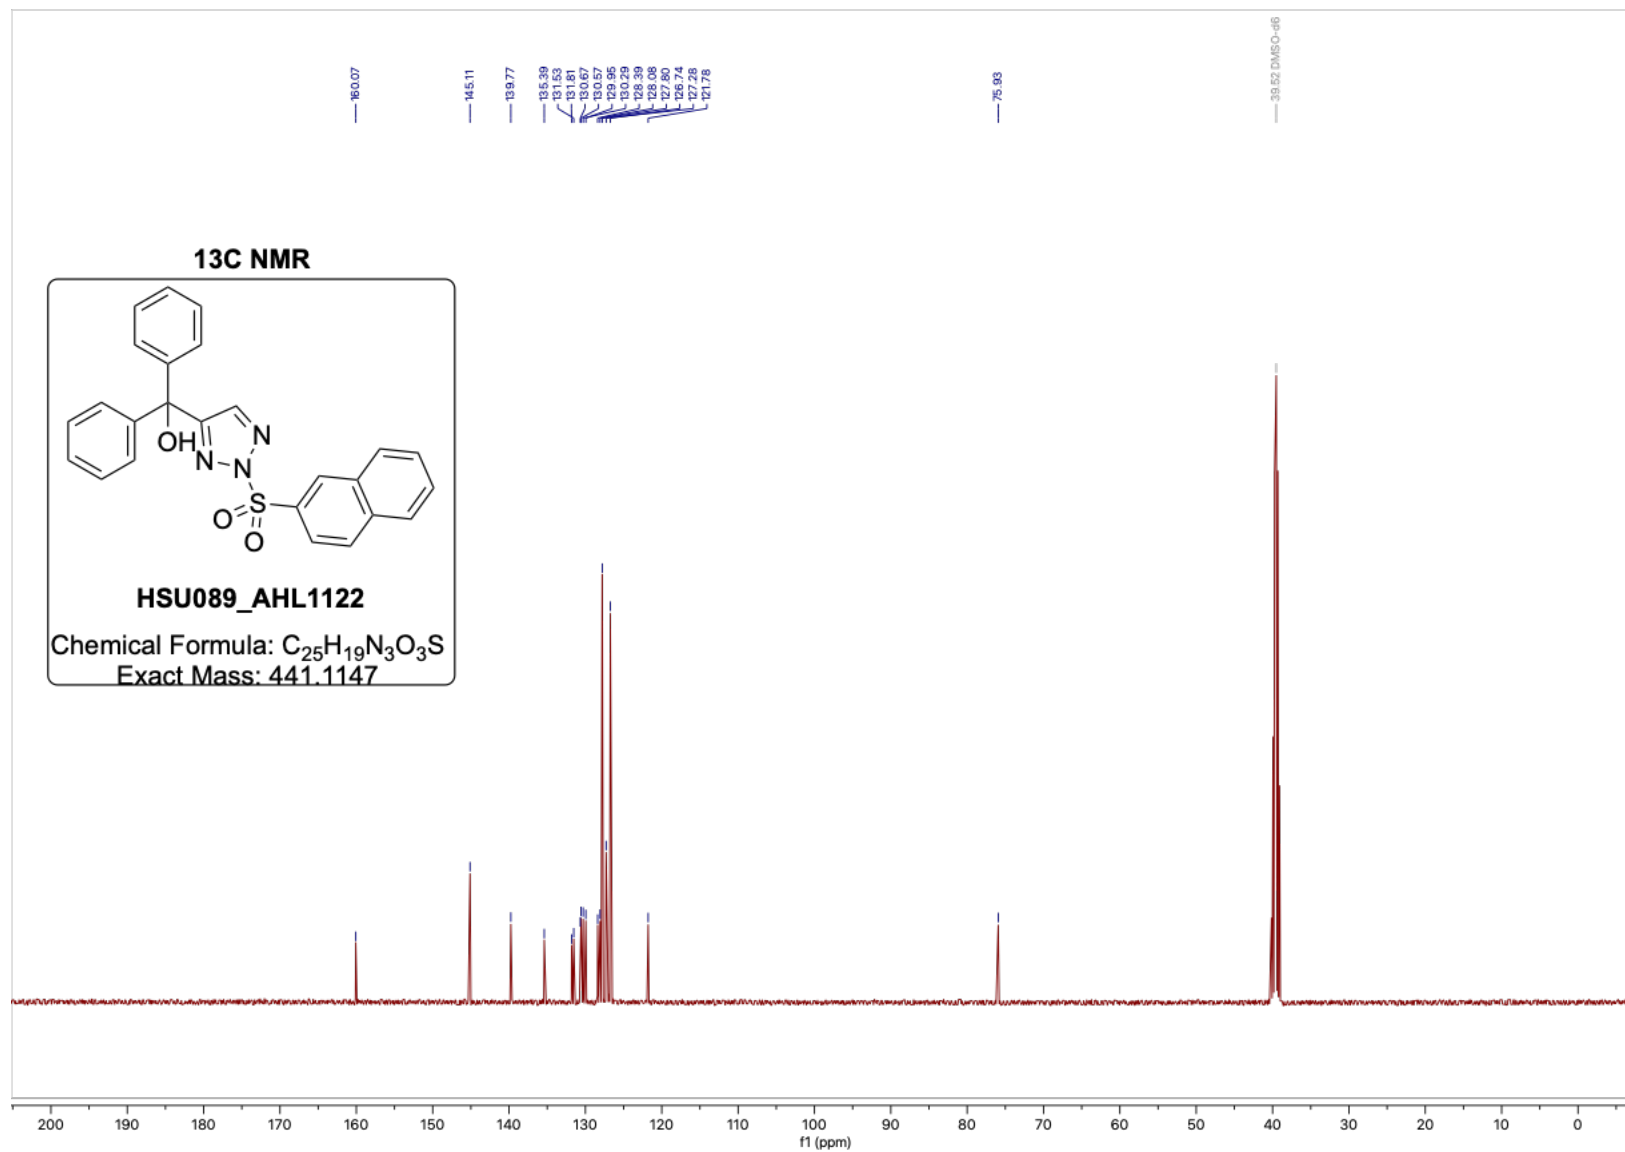

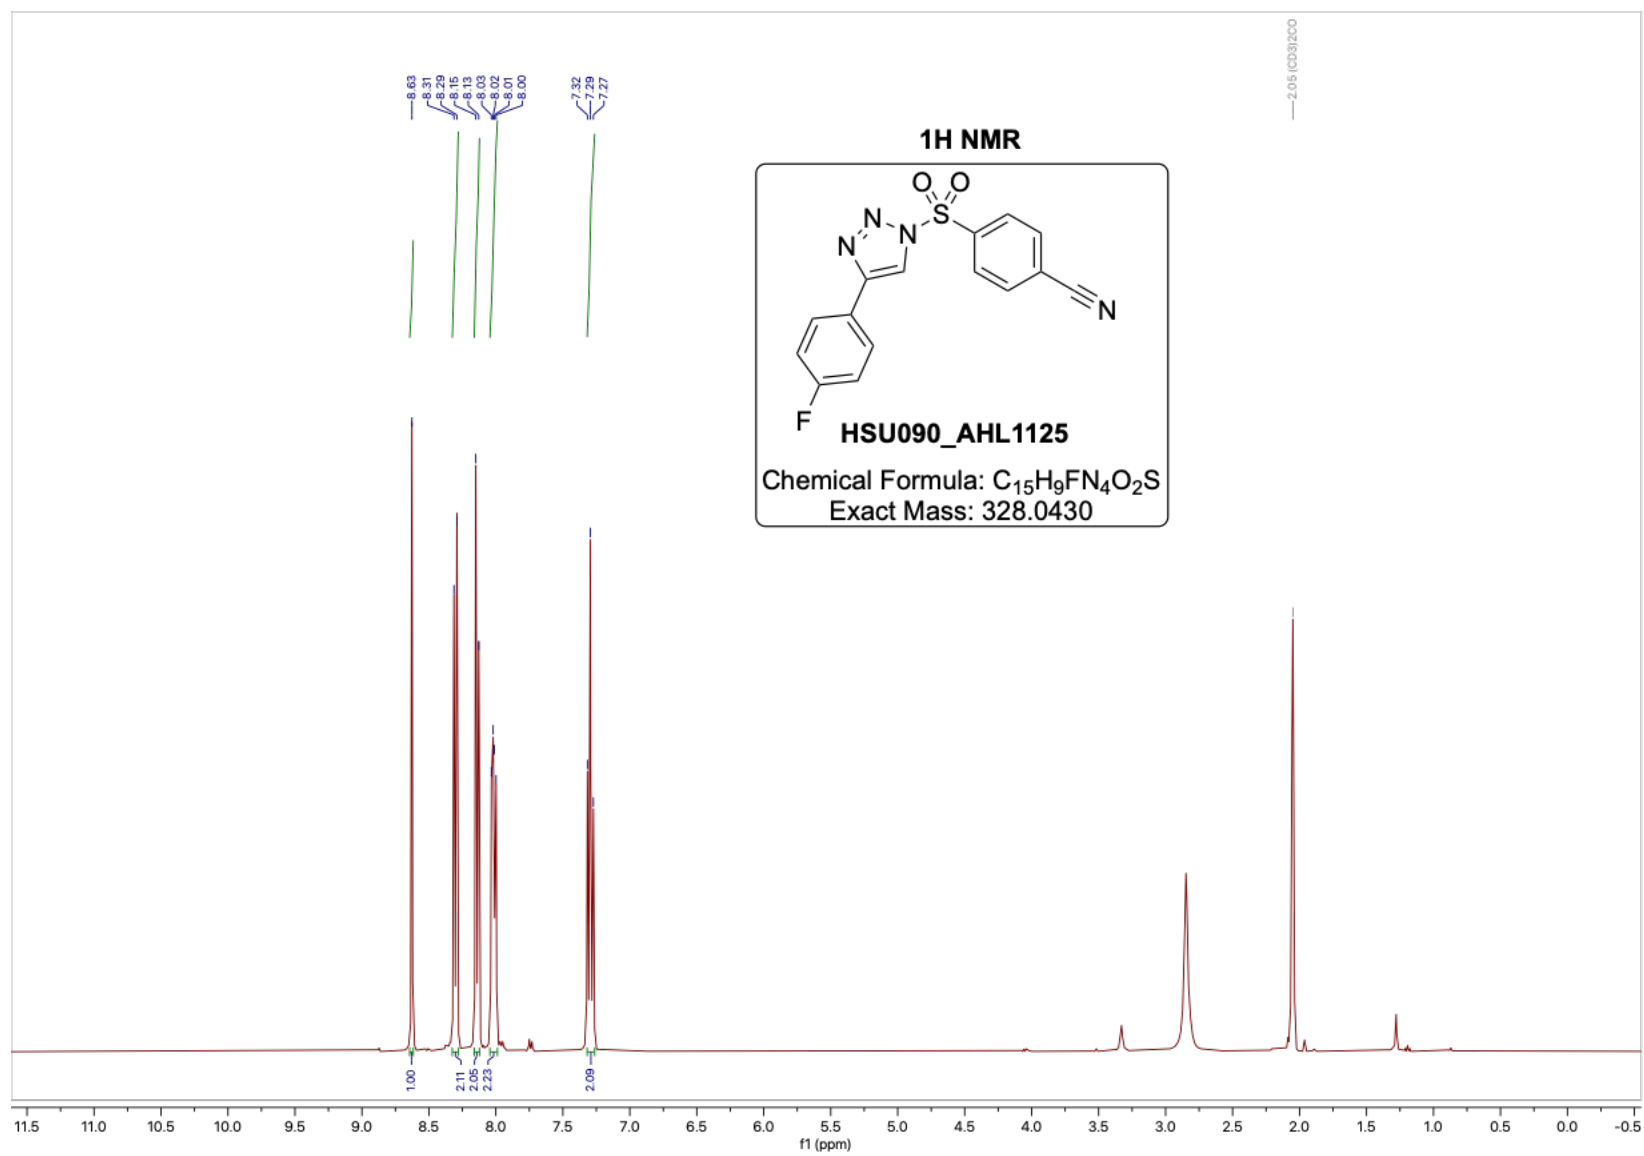

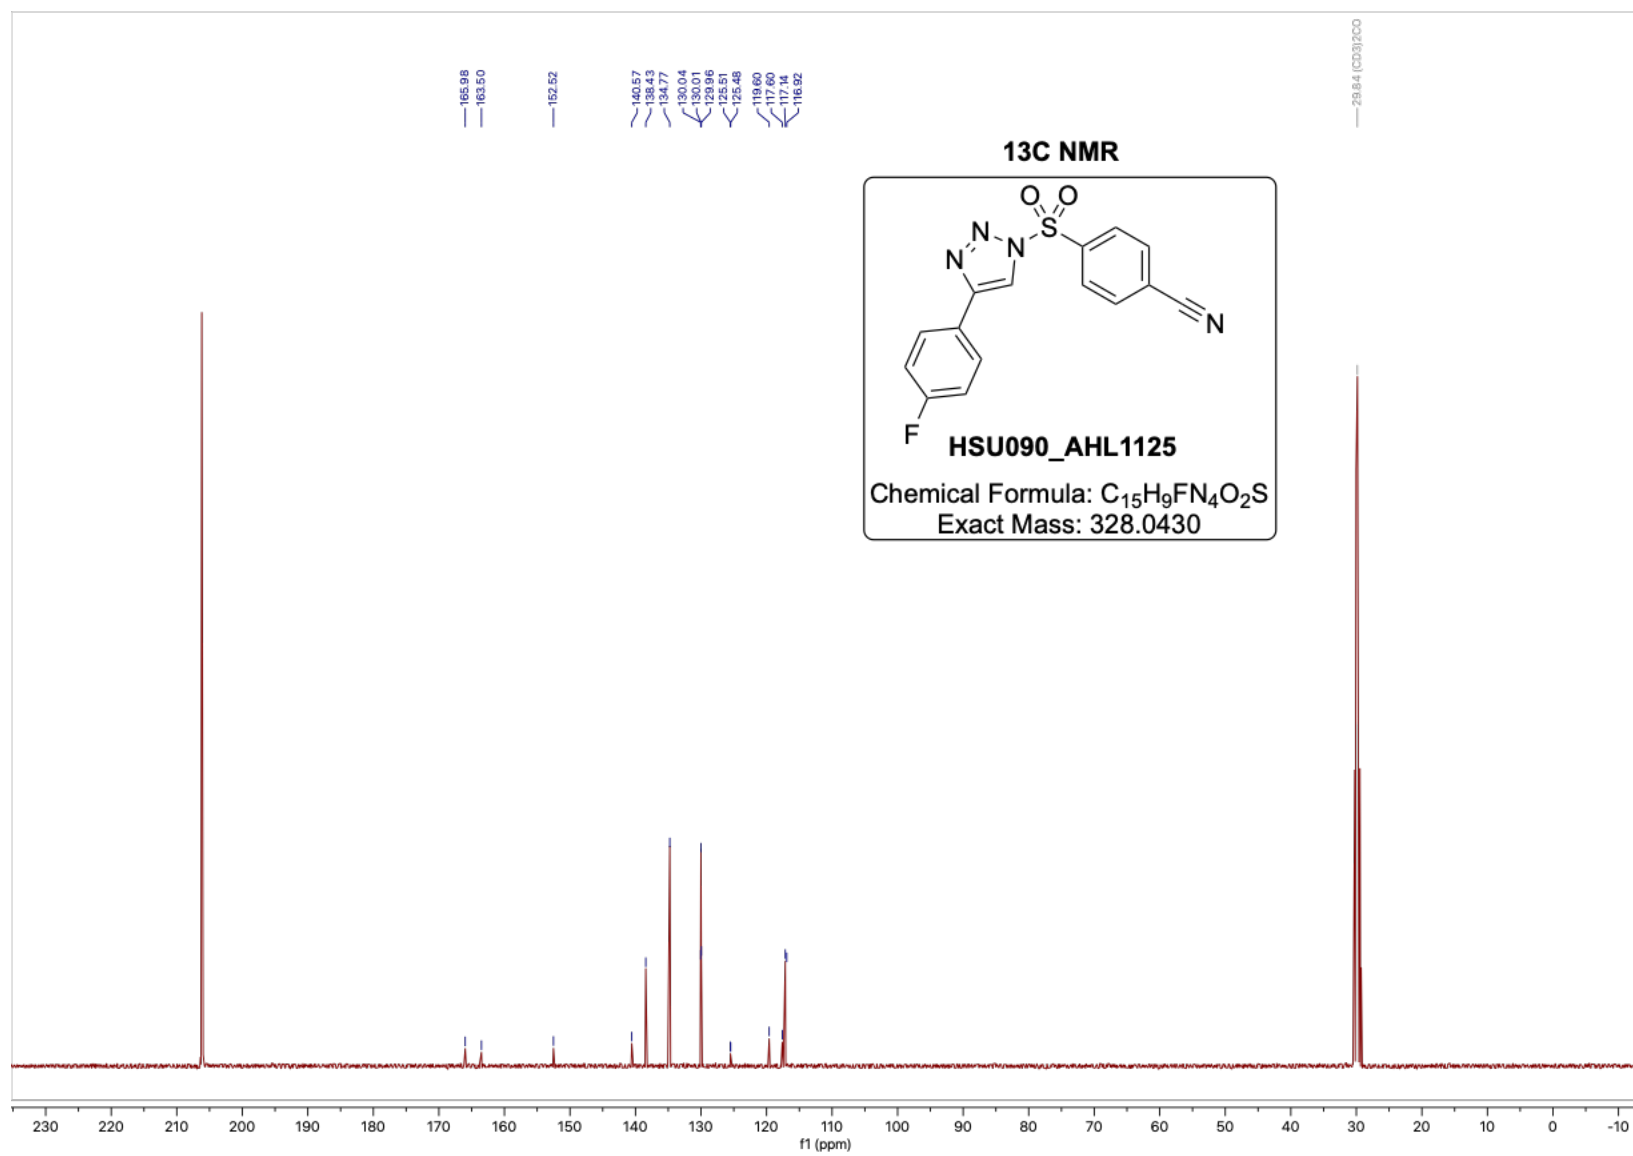

**<sup>19</sup>F NMR**

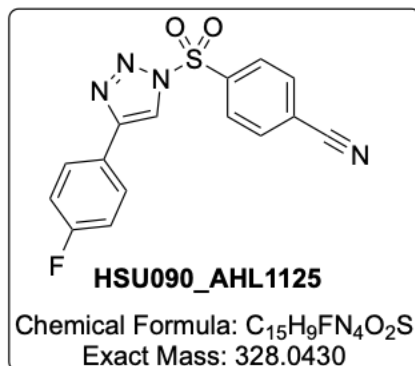

-111.66  
-111.68  
-111.70  
-111.72  
-111.74

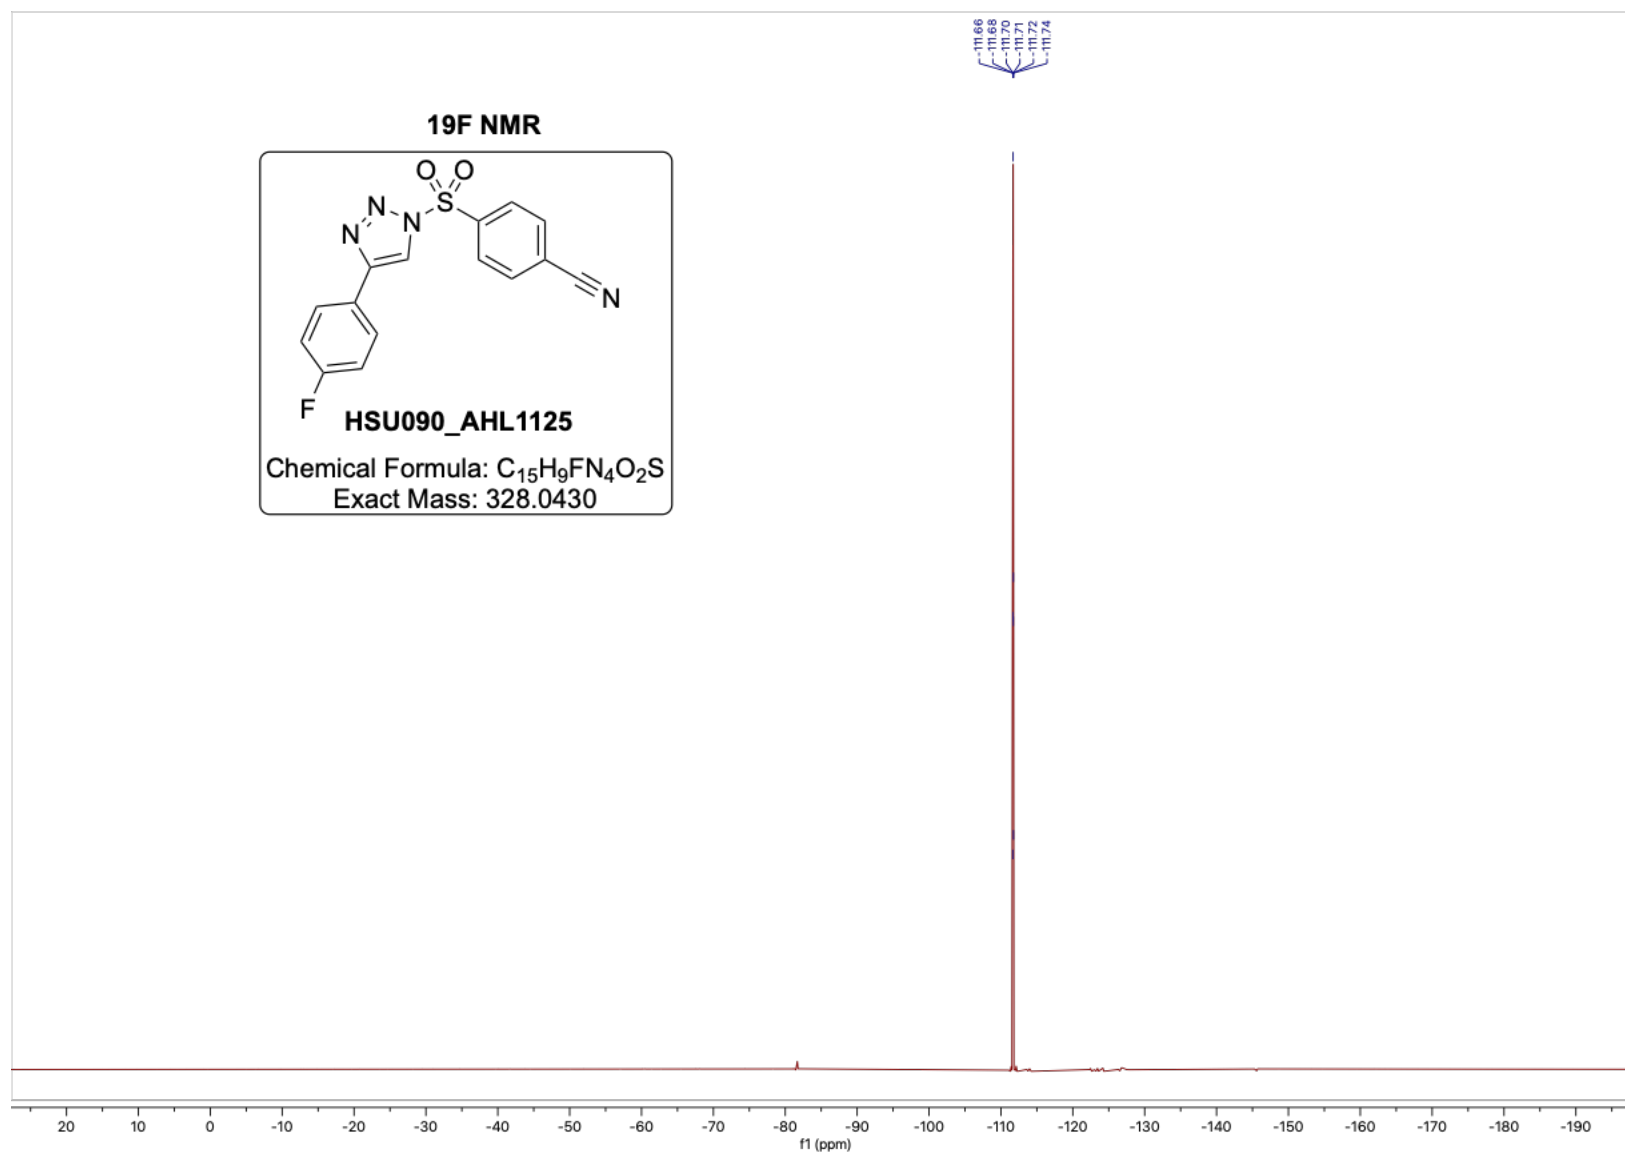

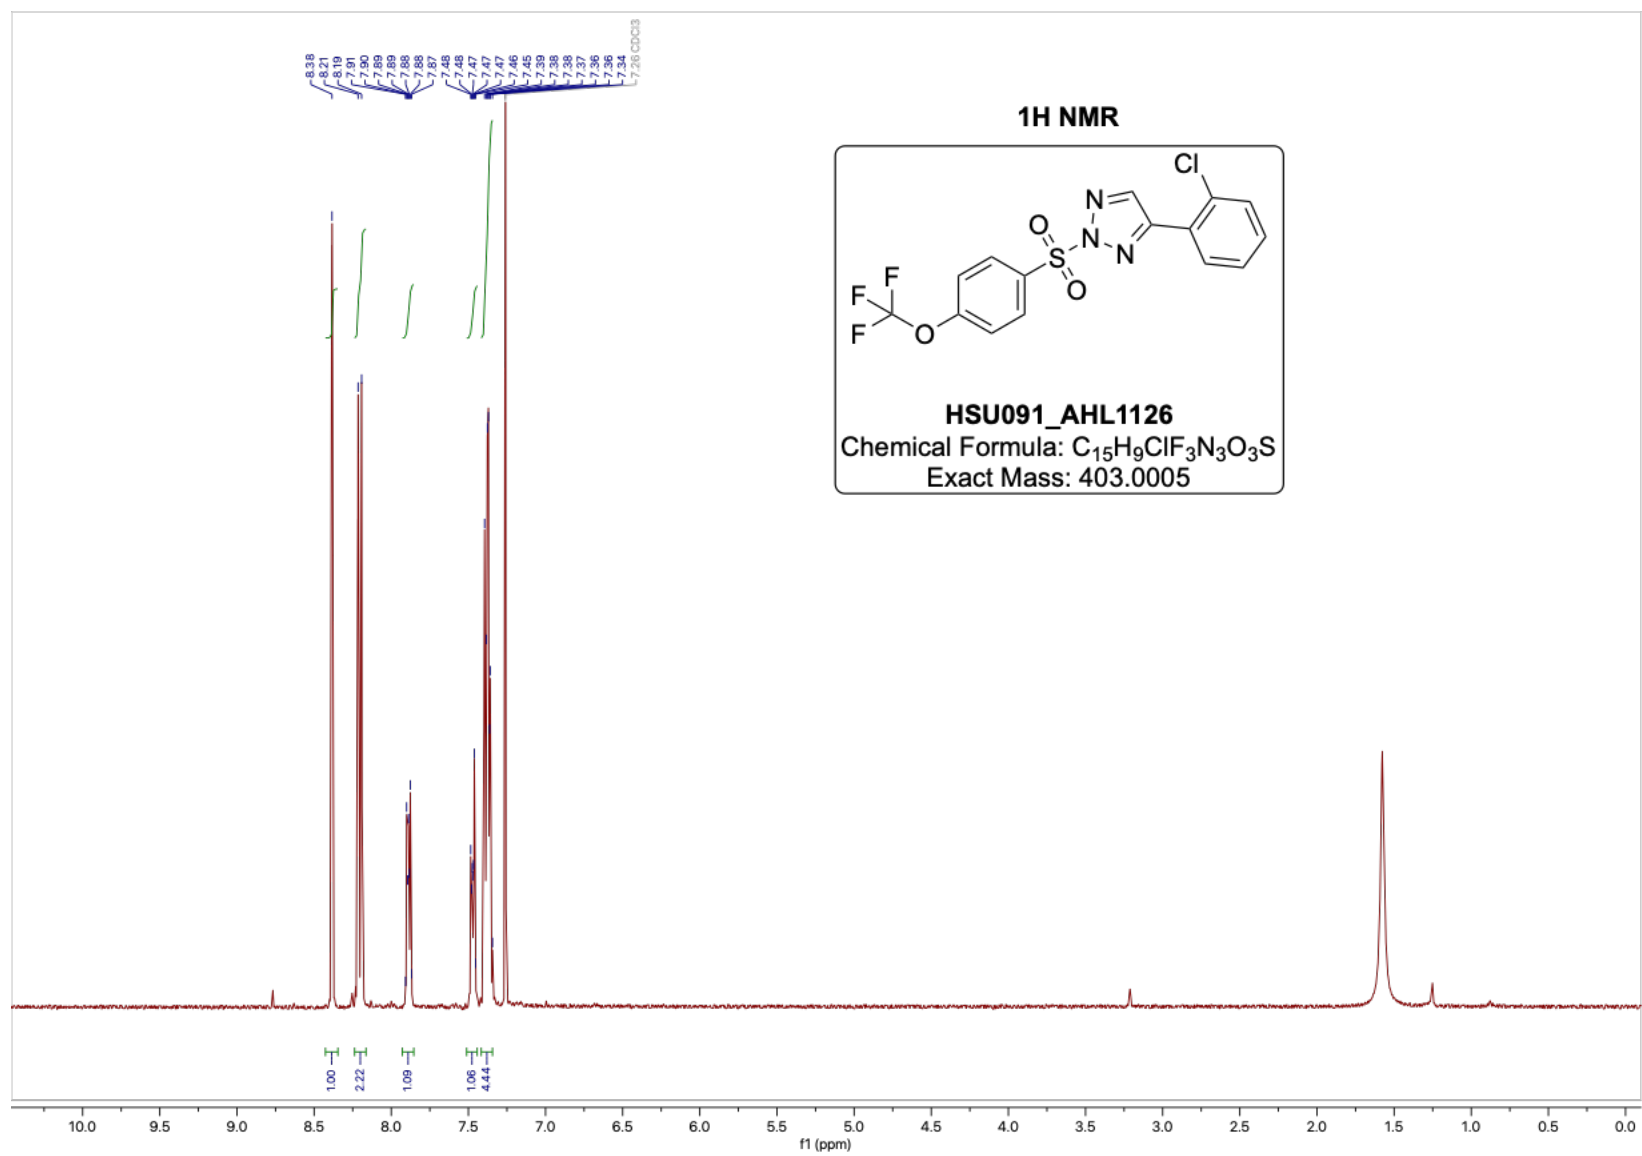

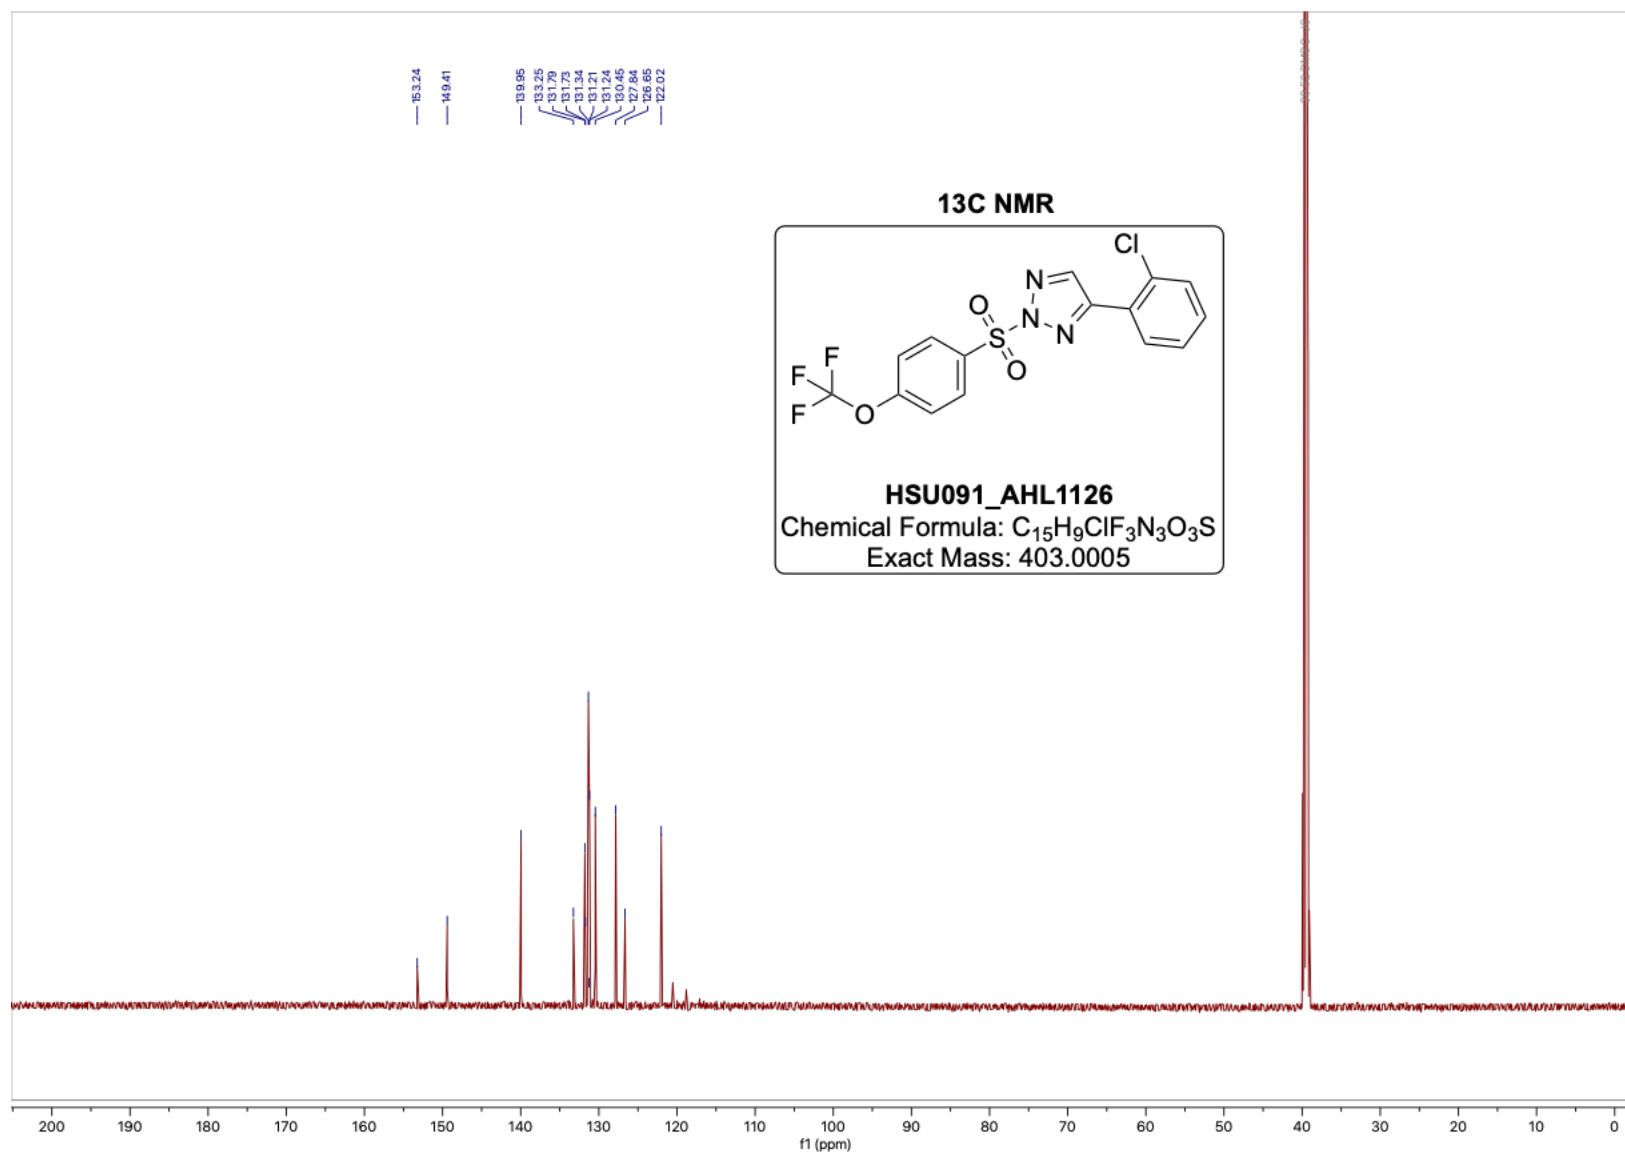

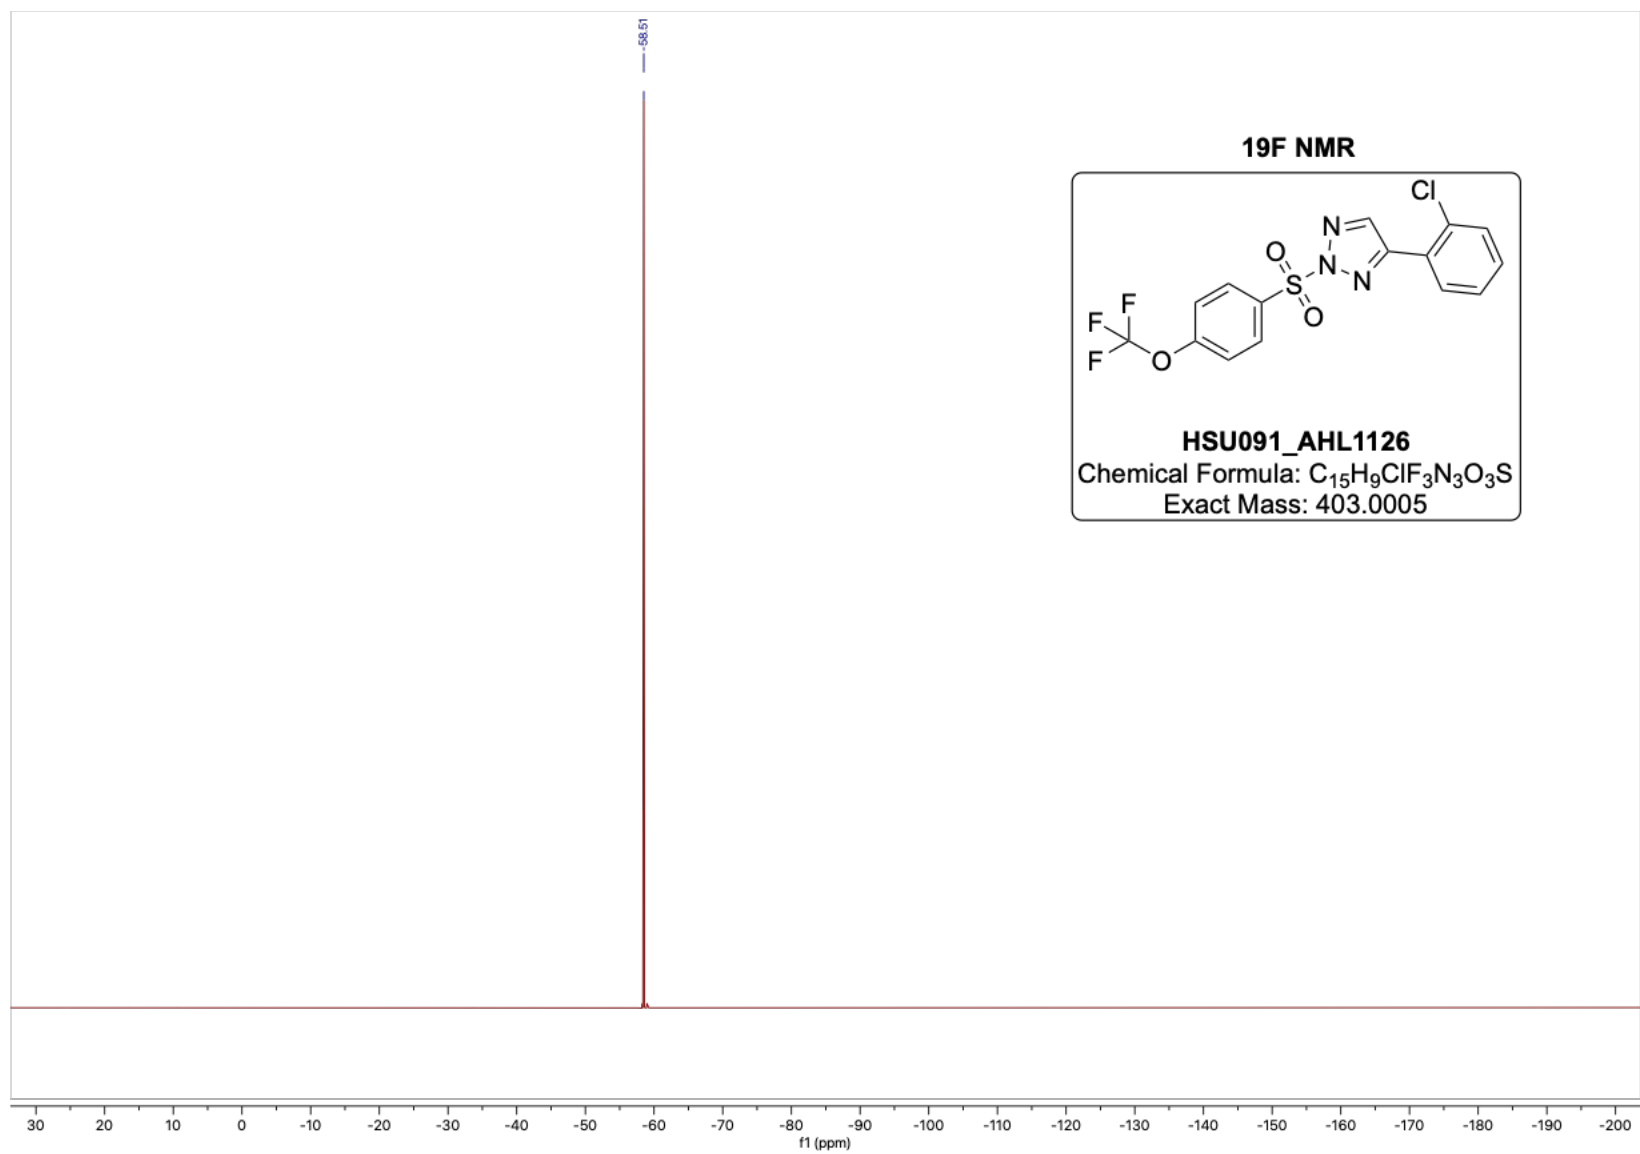



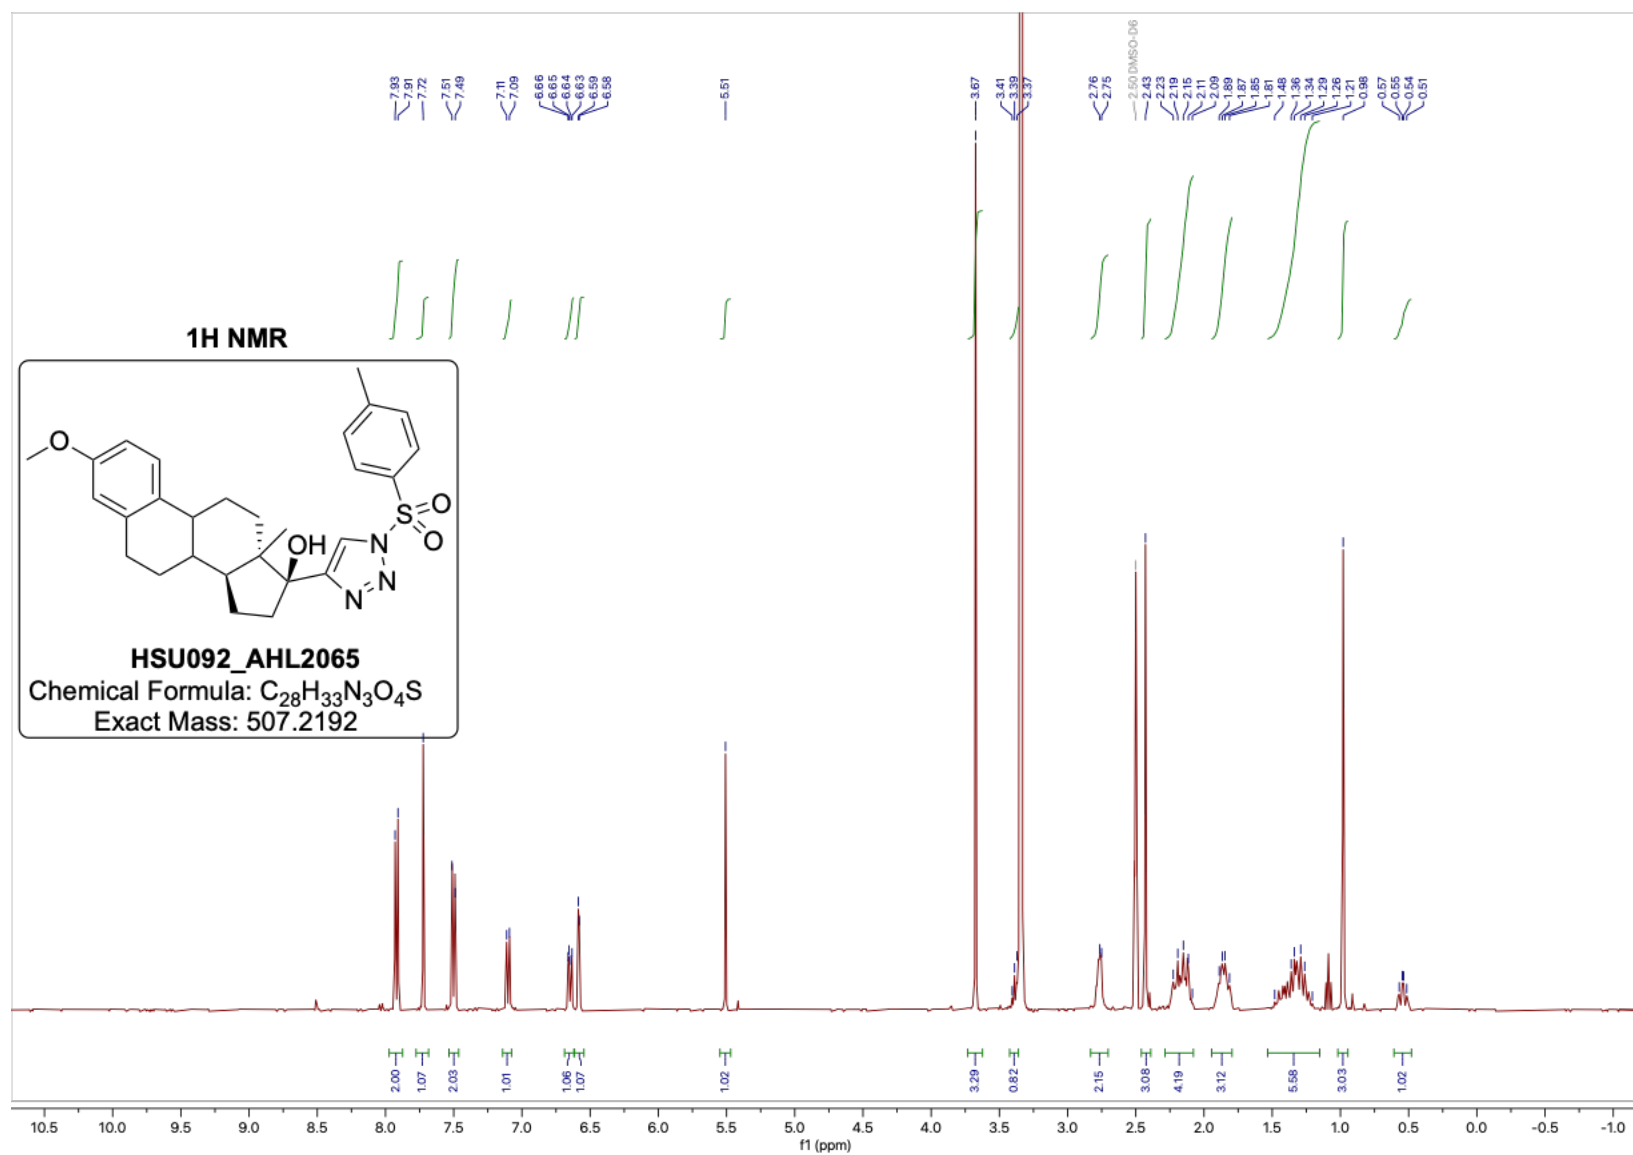

# **<sup>13</sup>C NMR**

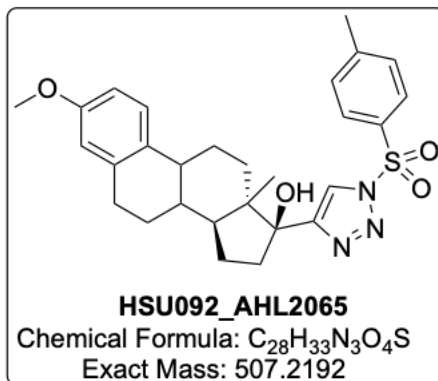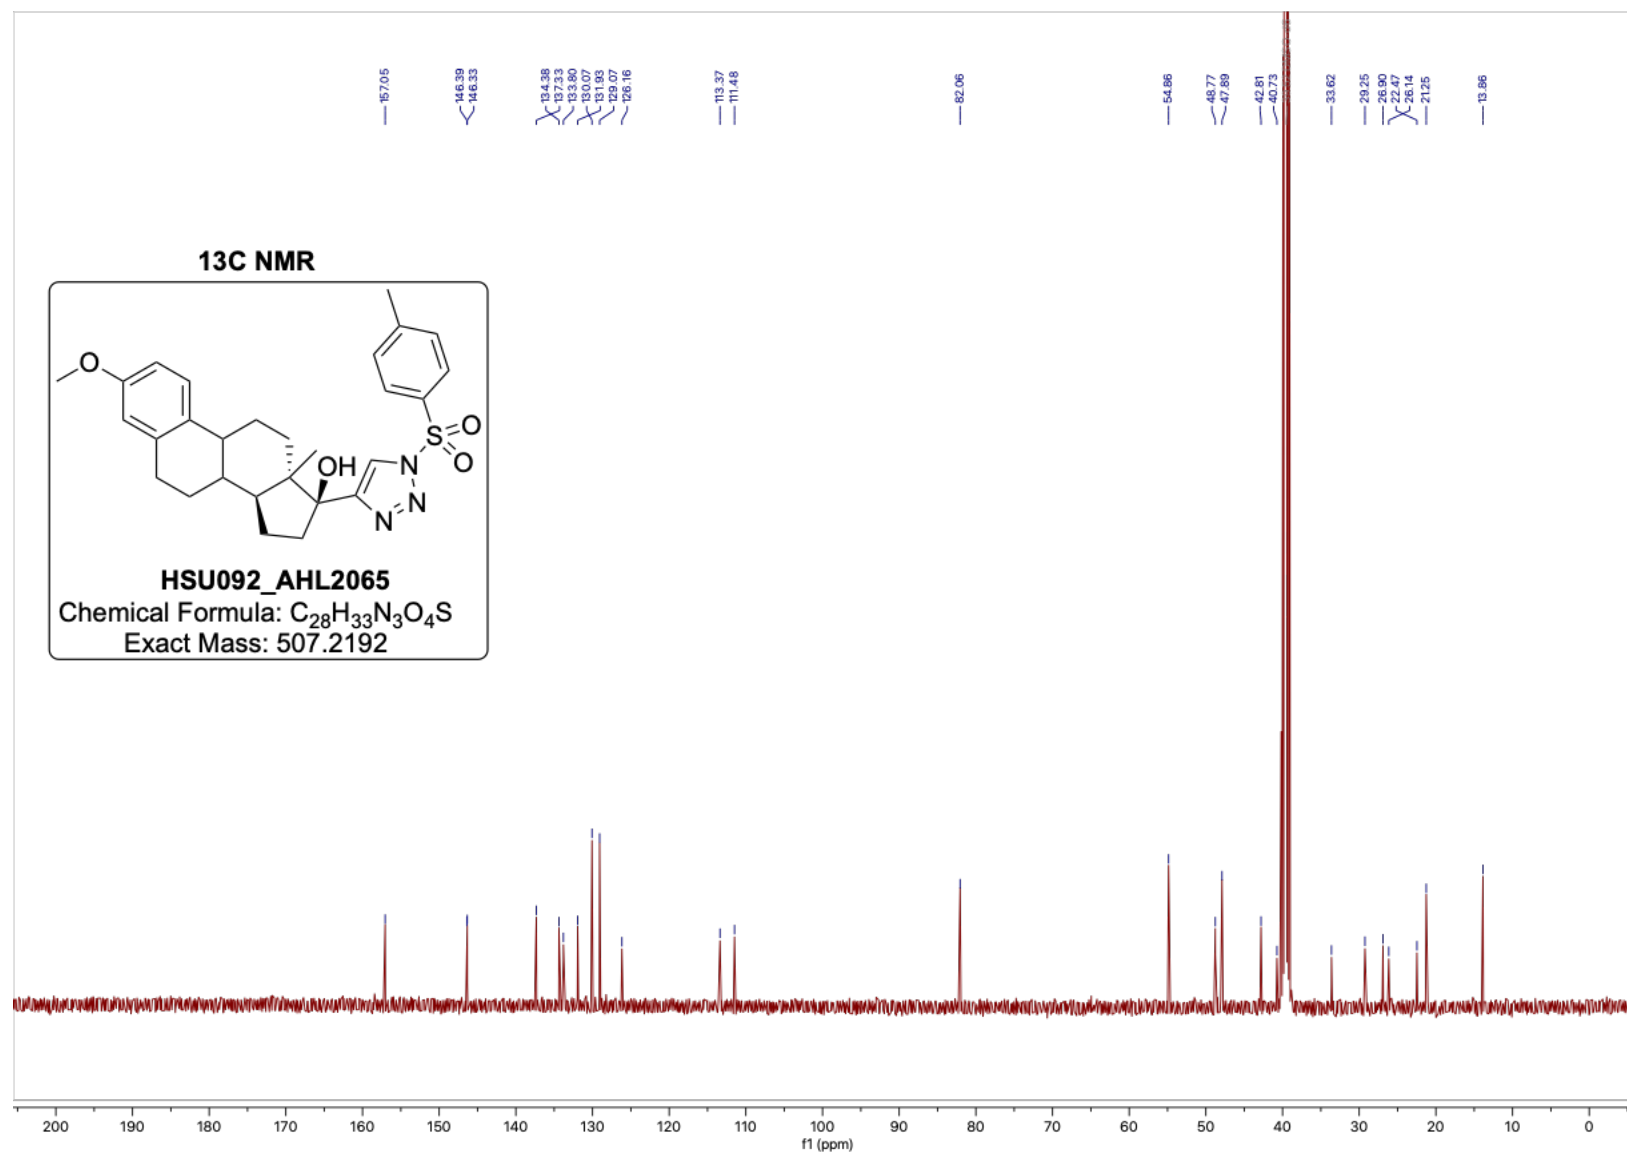

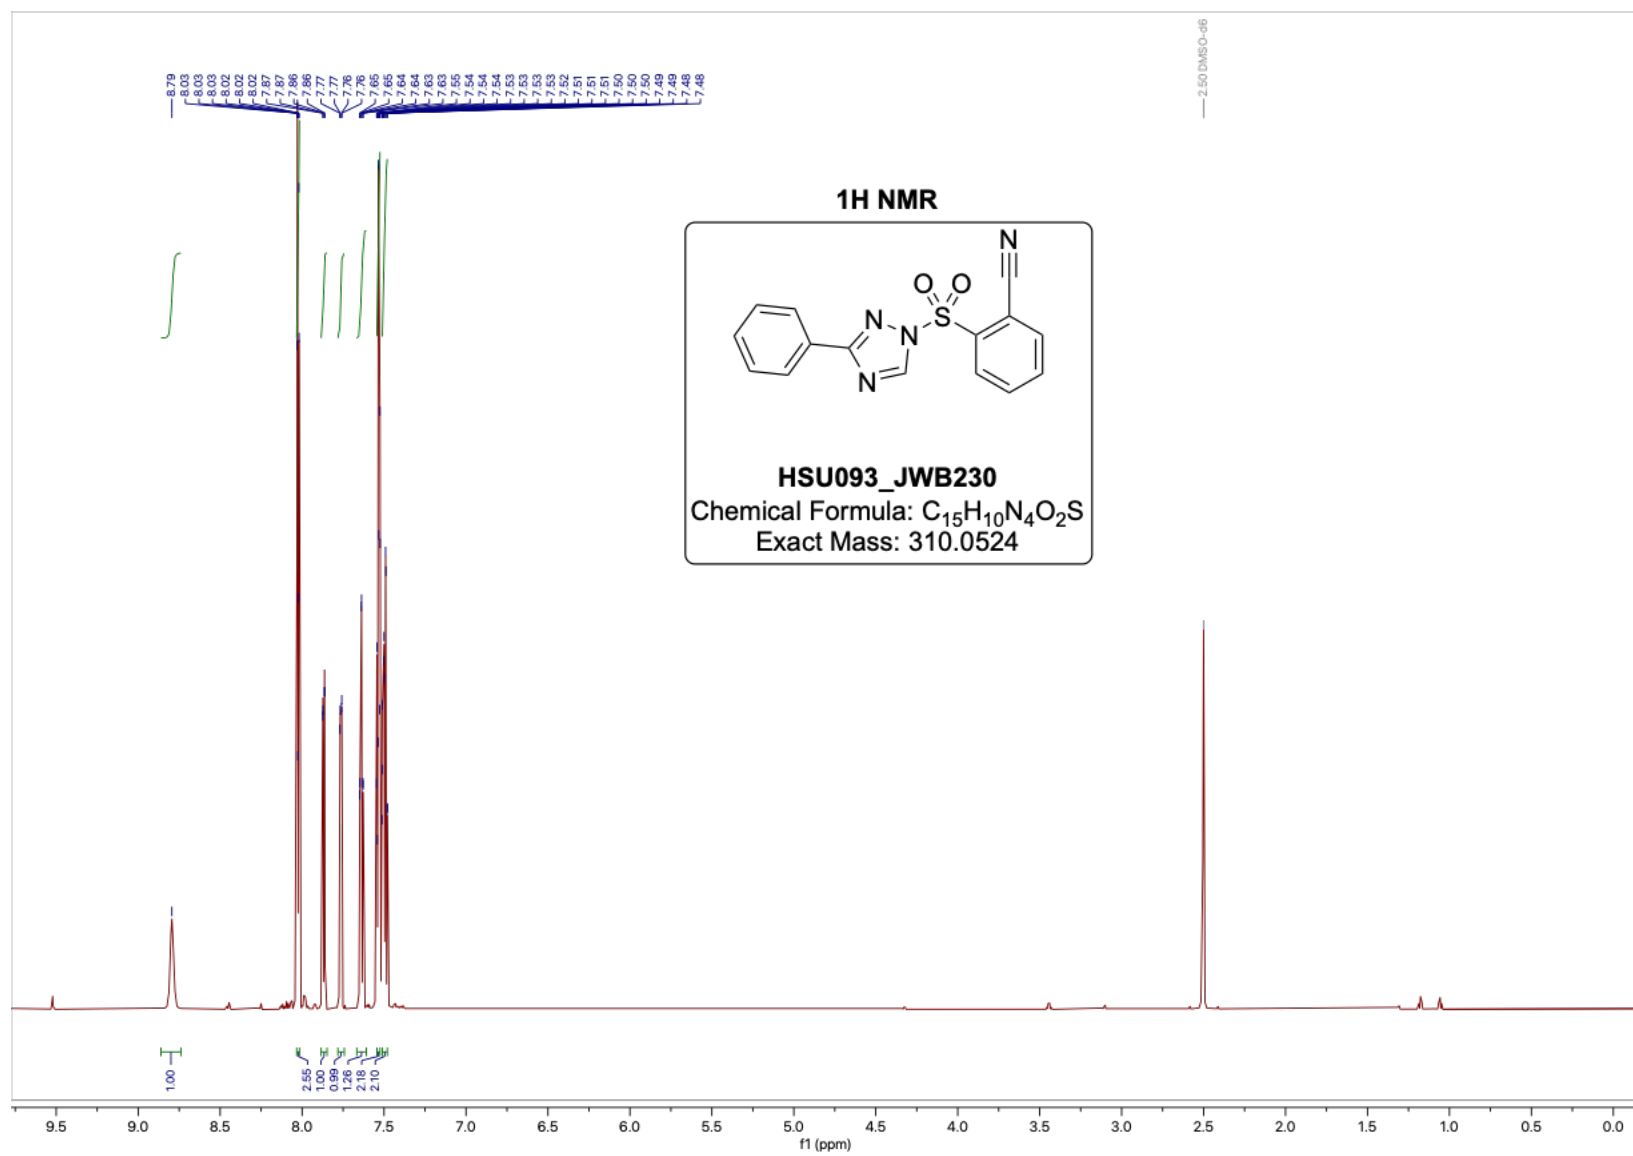

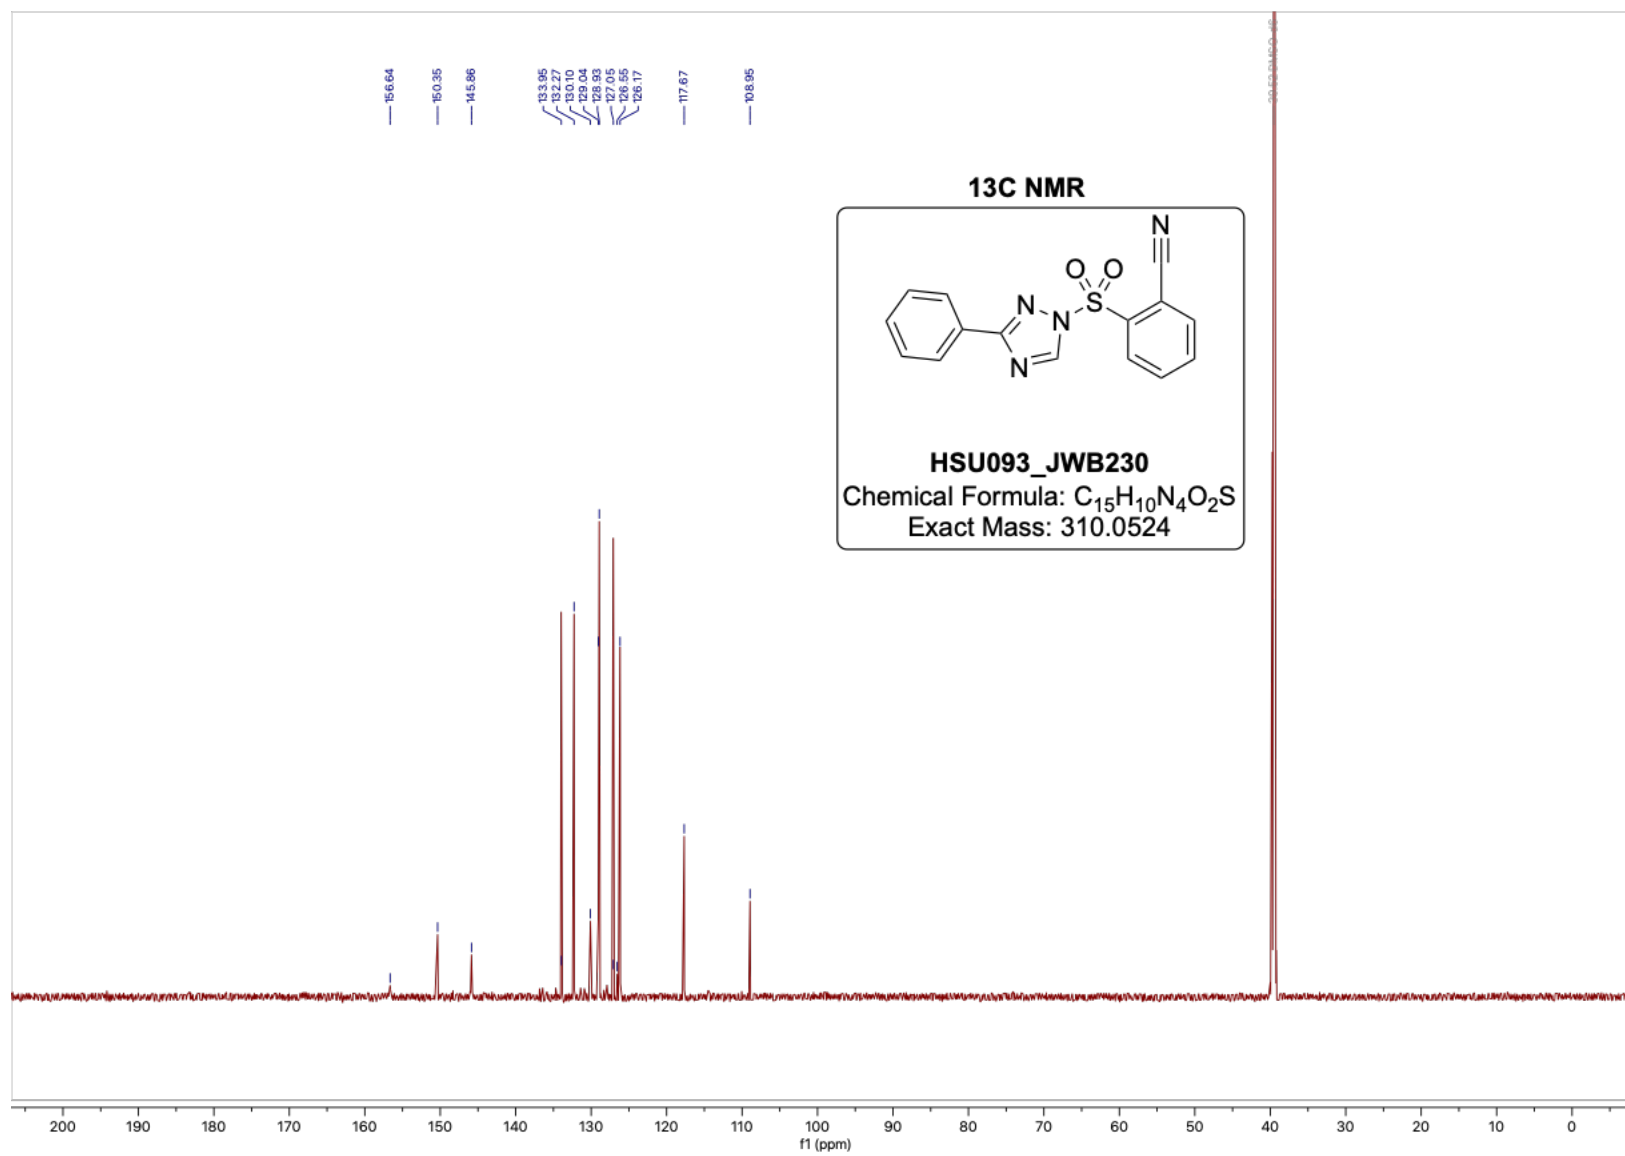

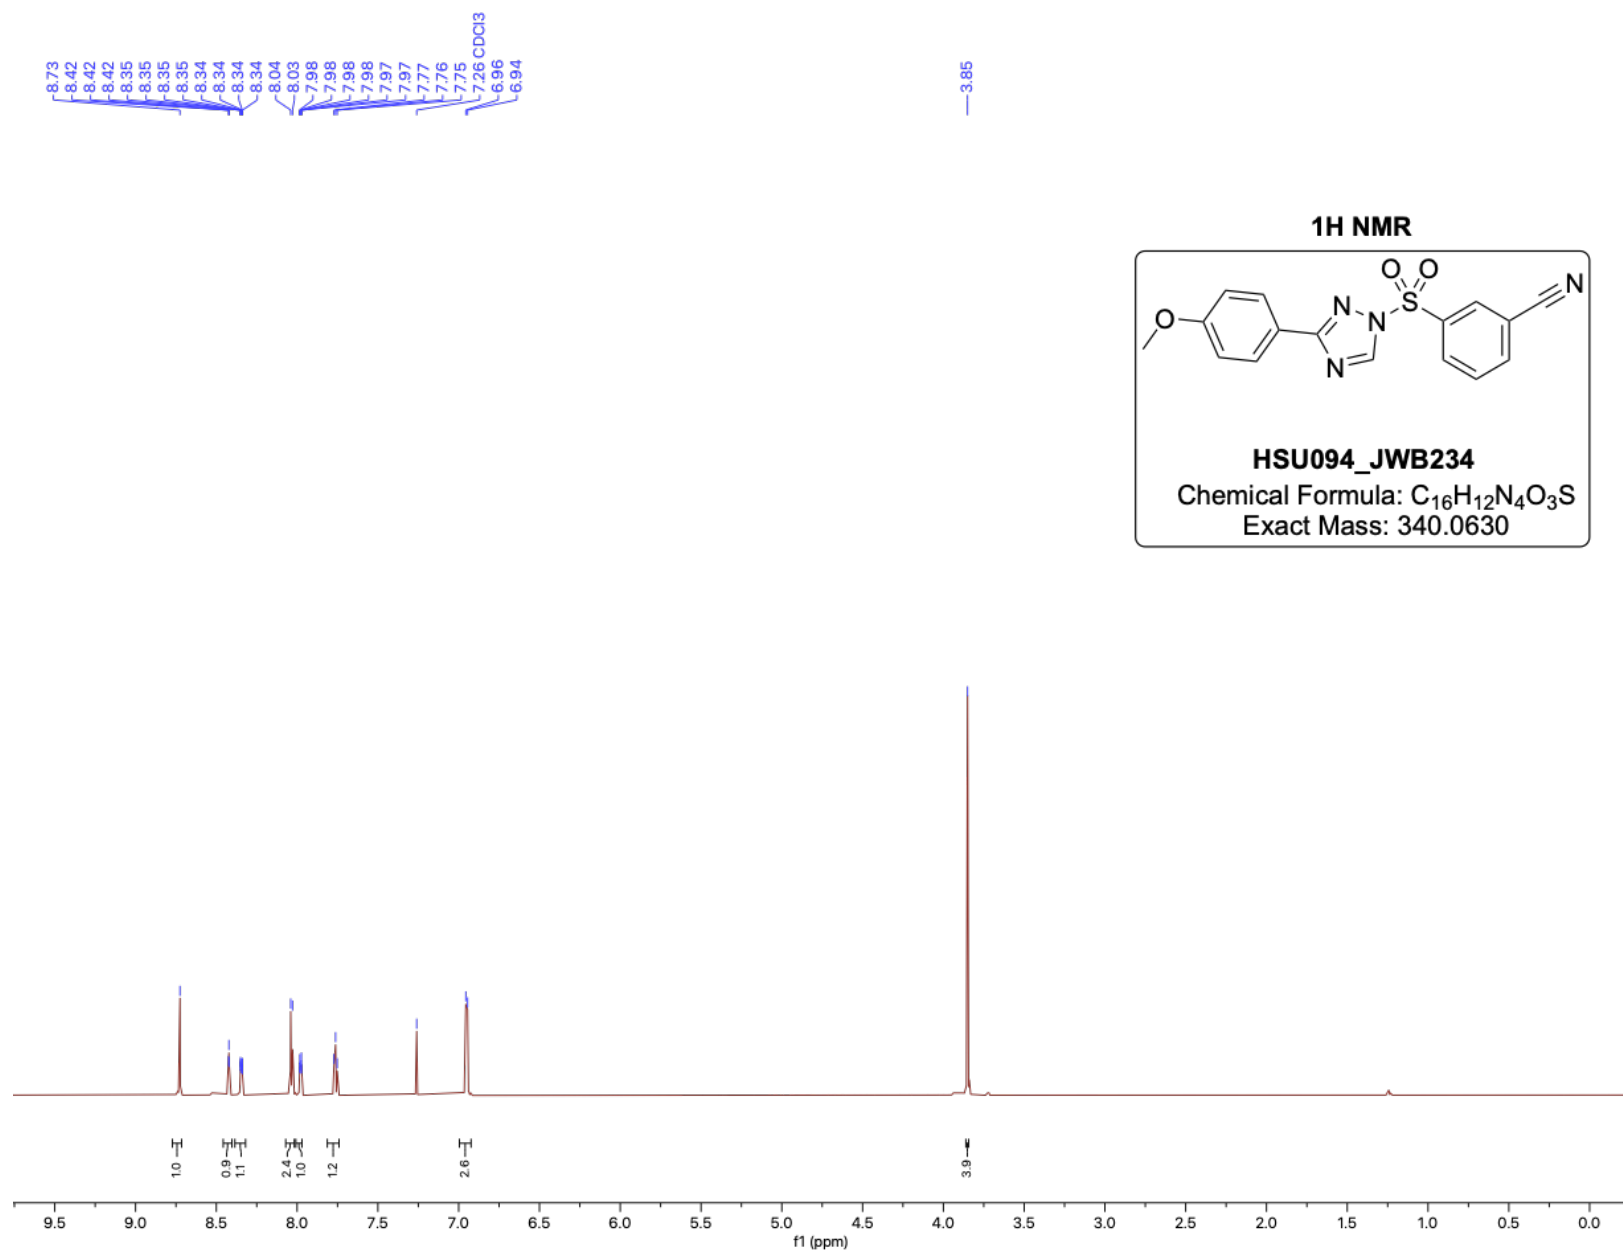

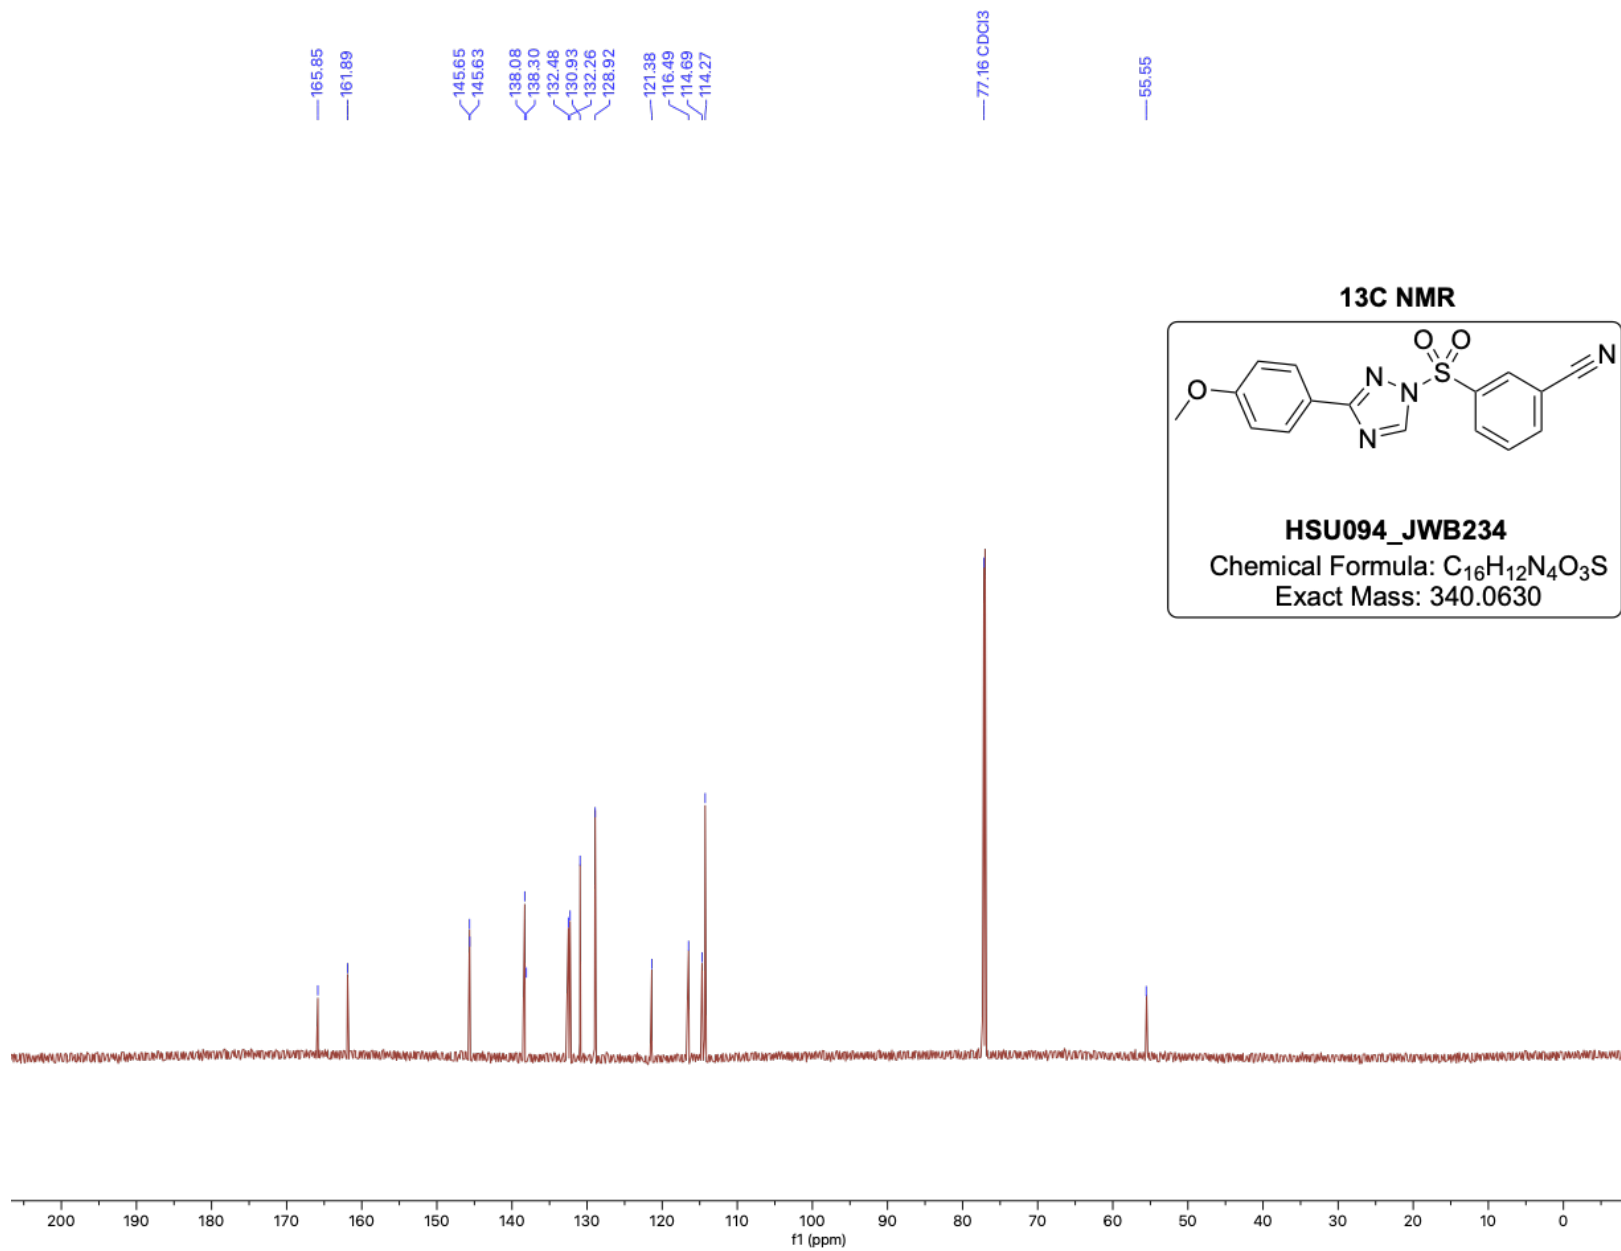

DML-I-83  
STANDARD FLUORINE PARAMETERS

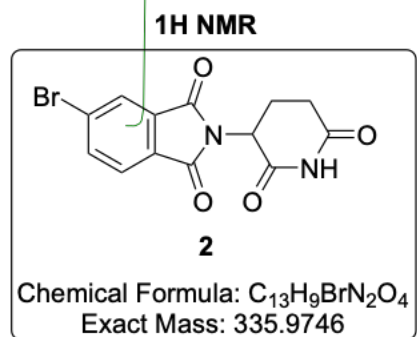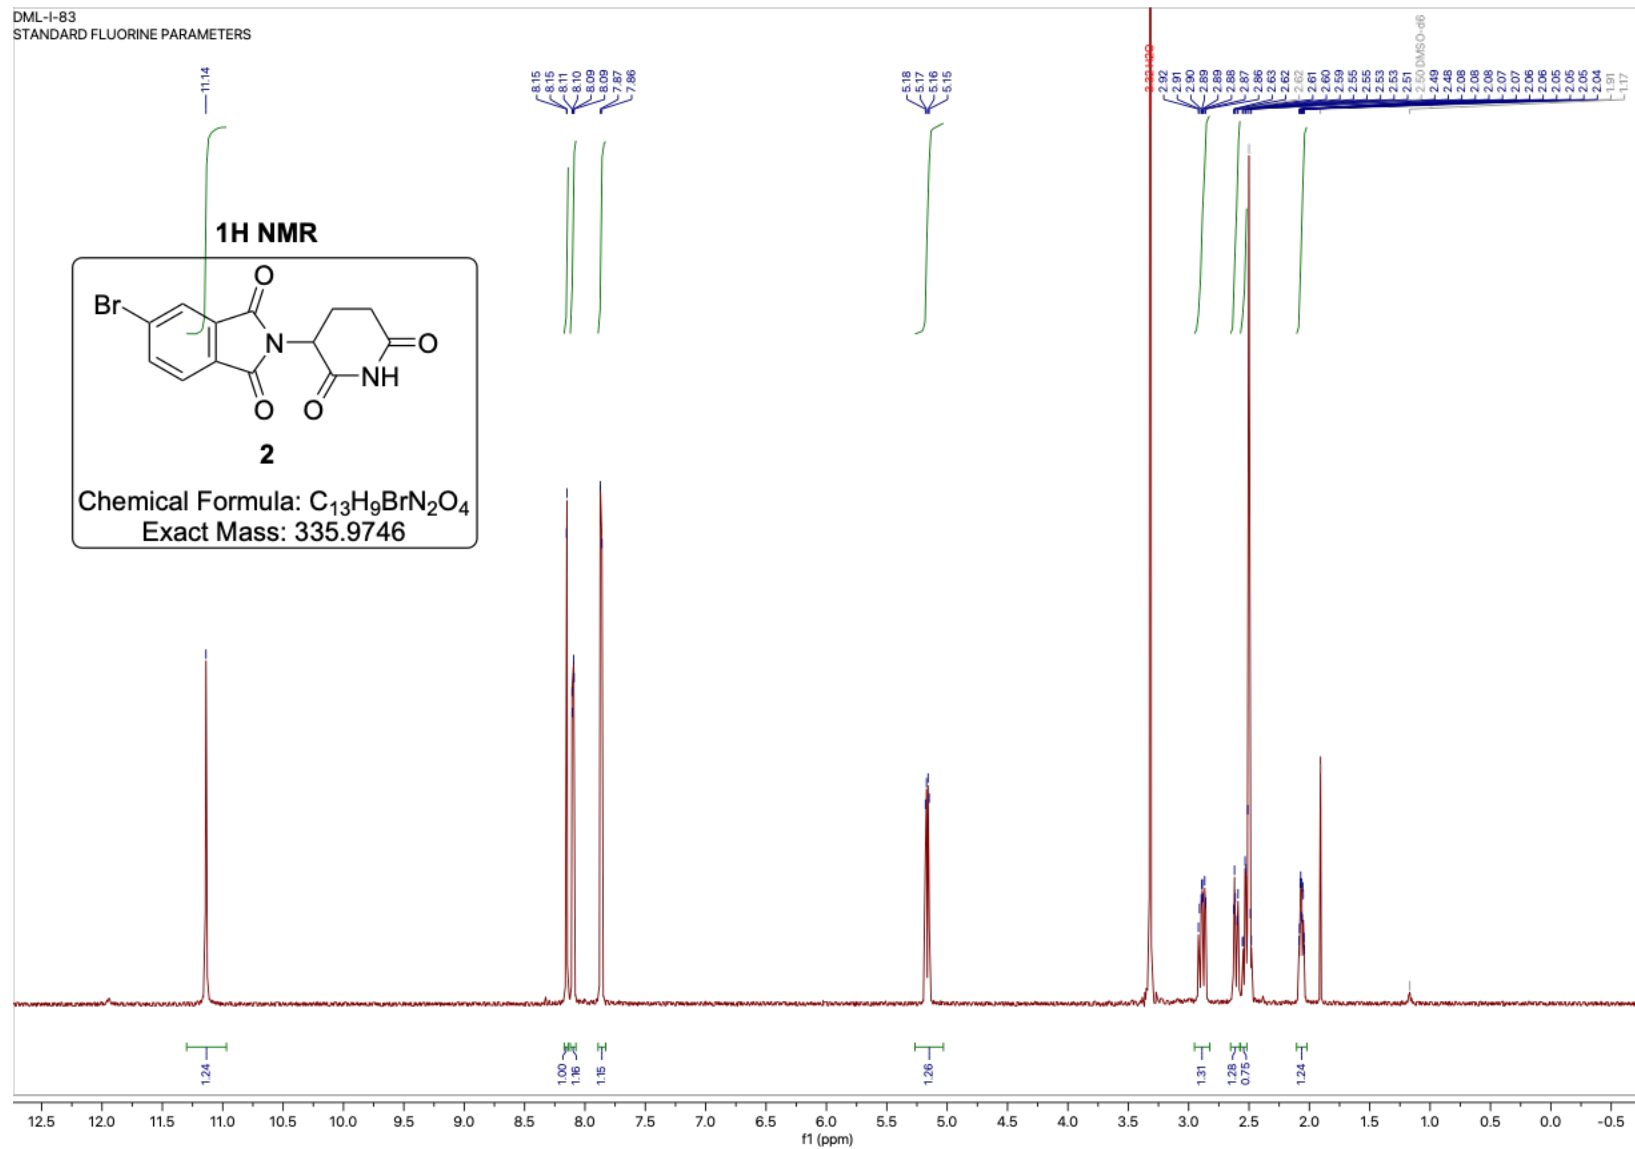

DML-I-85  
AHL-7-025-2(Recrystallized)

# 1H NMR

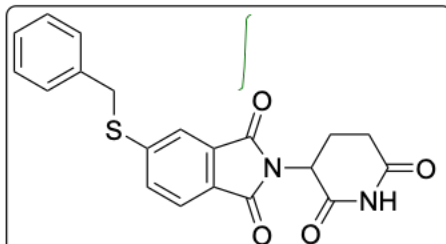

3

Chemical Formula:  $C_{20}H_{16}N_2O_4S$   
Exact Mass: 380.0831

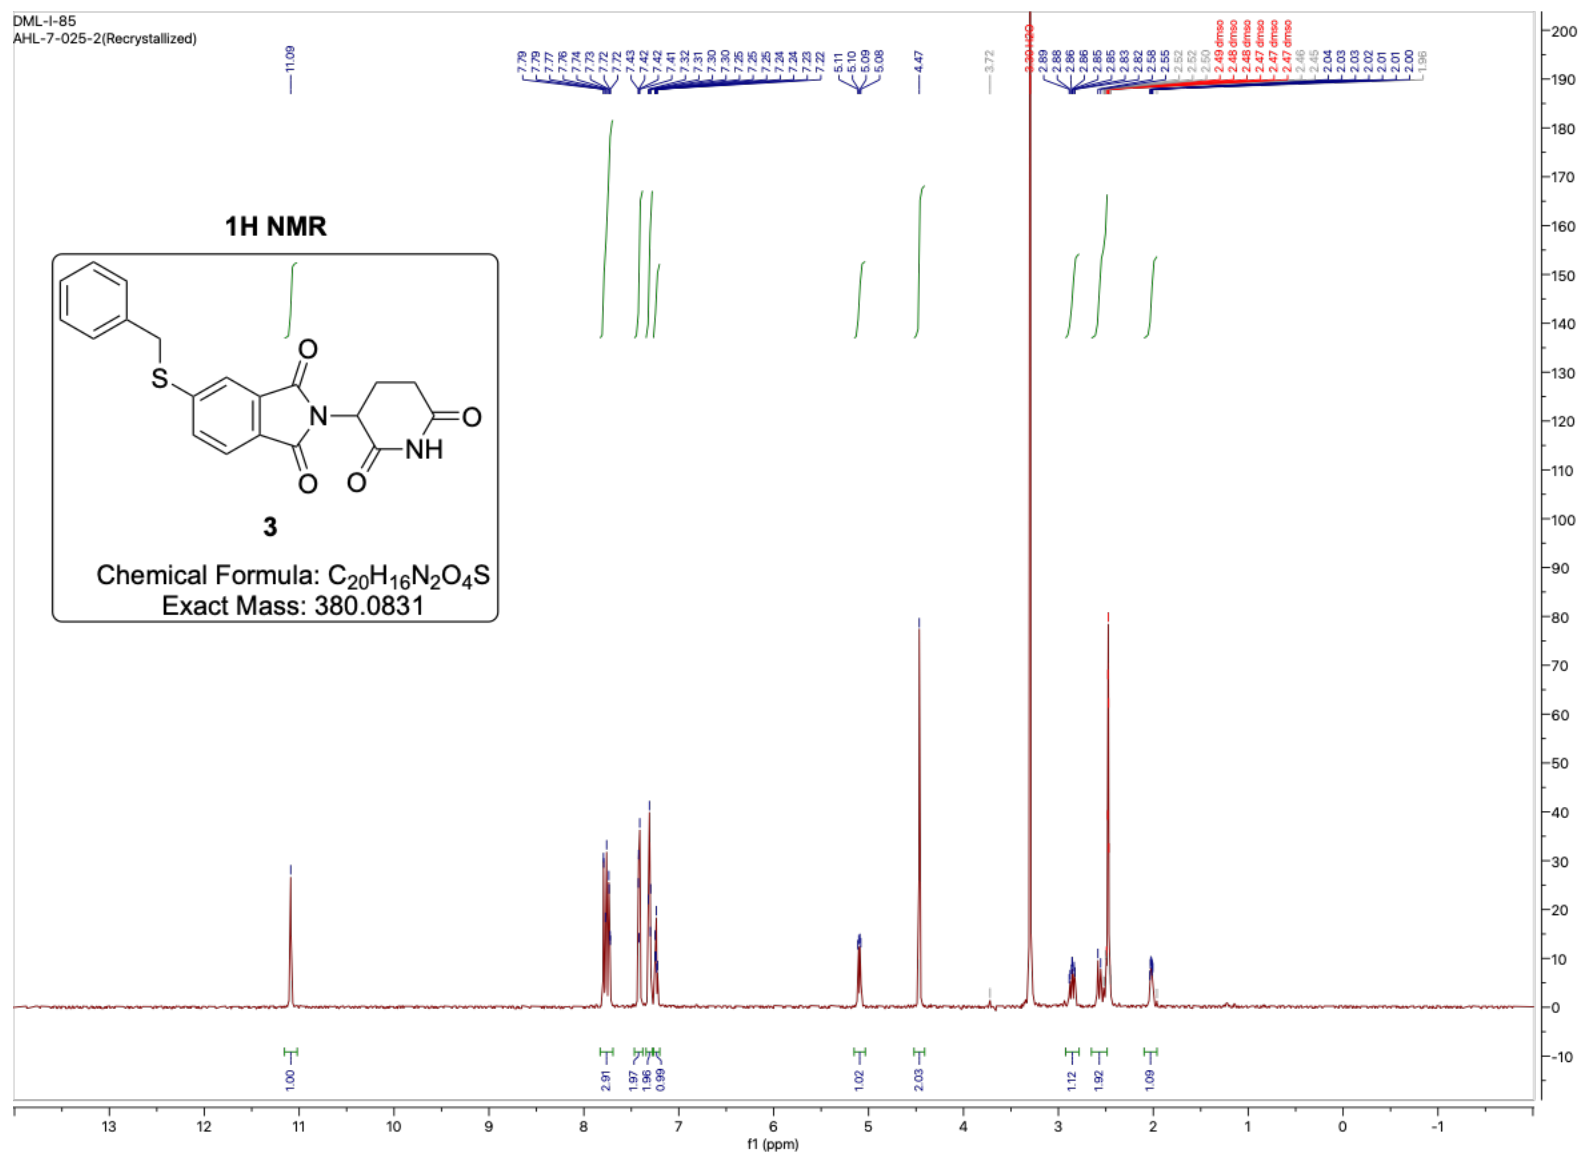



DML-I-87  
STANDARD FLUORINE PARAMETERS

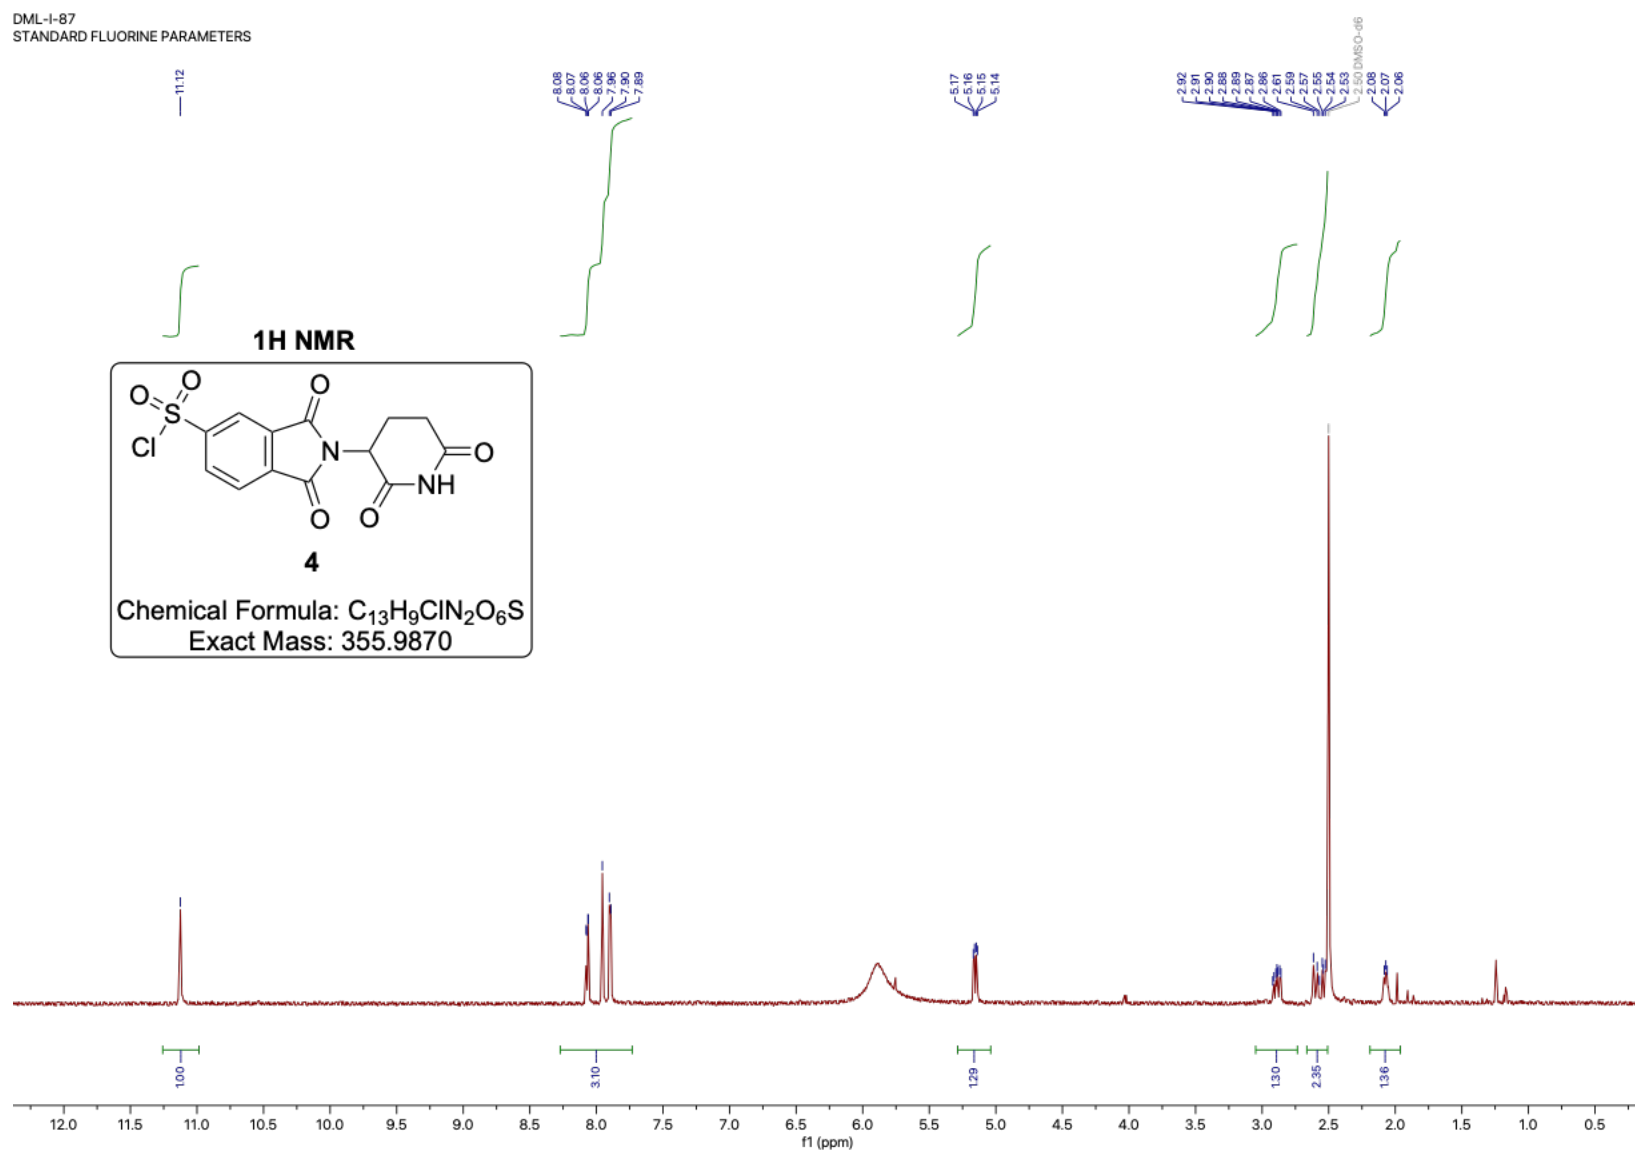

# Target Compound Screening Report

## Results Acquired by The University of Texas at Austin Mass Spectrometry Facility

**Data File** MSF25-2063(JWB179)\_hrESIpos1.d    **Sample Name** 2063(JWB179)    **Comment** 2063(JWB179)  
**Position** P1-D1    **Instrument Name** 6530    **User Name**  
**Acq Method** FIA\_pos.m    **Acquired Time** 12/4/2025 10:43:53 AM    **DA Method** MSF.m

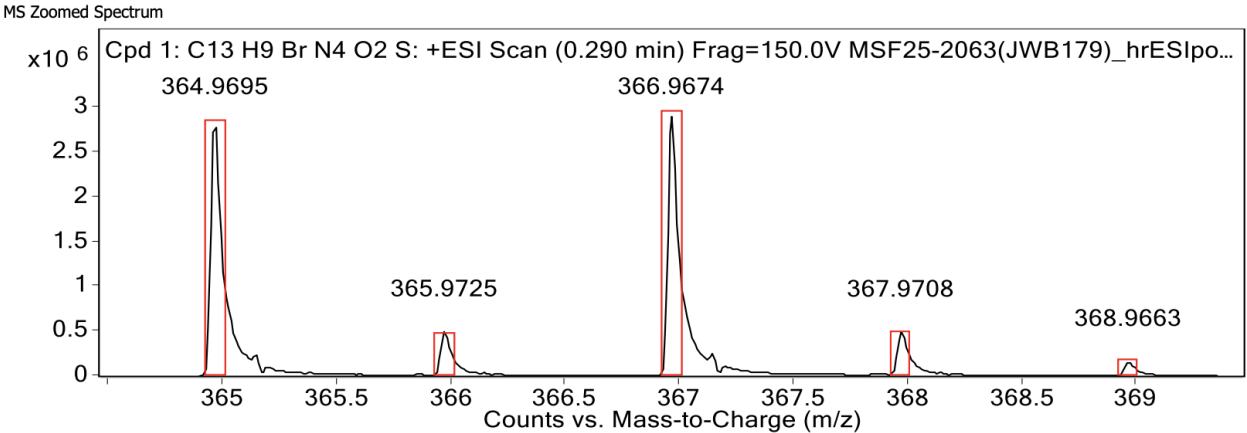

MS Spectrum Peak List

| Obs. m/z | Calc. m/z | Charge | Abundance | Formula      | Ion Species | Tgt Mass Error (ppm) |
|----------|-----------|--------|-----------|--------------|-------------|----------------------|
| 364.9695 | 364.9702  | 1      | 2836650   | C13H9BrN4O2S | (M+H)+      | 2.1                  |
| 365.9725 | 365.9729  | 1      | 501572    | C13H9BrN4O2S | (M+H)+      | 1.08                 |
| 366.9674 | 366.9682  | 1      | 2928898   | C13H9BrN4O2S | (M+H)+      | 2.13                 |
| 367.9708 | 367.9708  | 1      | 497794    | C13H9BrN4O2S | (M+H)+      | 0.07                 |
| 368.9663 | 368.9666  | 1      | 170136    | C13H9BrN4O2S | (M+H)+      | 0.66                 |

--- End Of Report ---

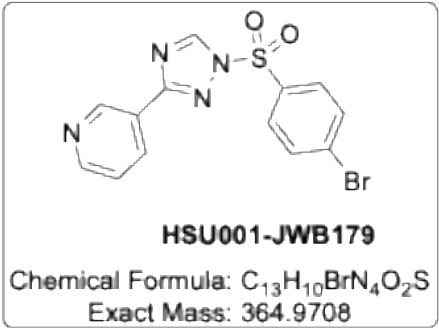

# Target Compound Screening Report

## Results Acquired by The University of Texas at Austin Mass Spectrometry Facility

Data File MSF25-2042(JWB-222)\_hrESIp0s1.d      Sample Name 2042(JWB-222)      Comment 2042(JWB-222)  
Position P1-A9      Instrument Name 6530      User Name  
Acq Method FIA\_pos.m      Acquired Time 11/24/2025 2:05:59 PM      DA Method MSF.m

MS Zoomed Spectrum

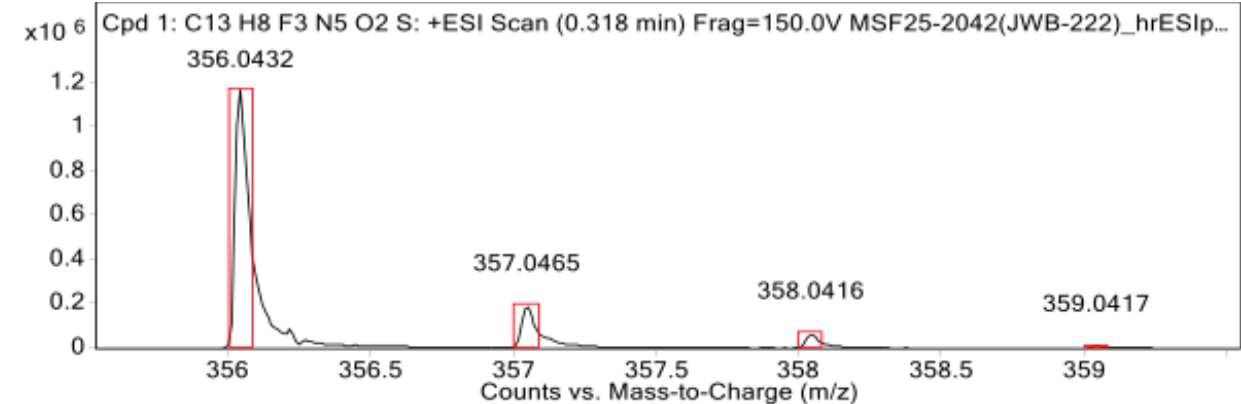

### MS Spectrum Peak List

| Obs. m/z | Calc. m/z | Charge | Abundance | Formula      | Ion Species | Tgt Mass Error (ppm) |
|----------|-----------|--------|-----------|--------------|-------------|----------------------|
| 356.0432 | 356.0424  | 1      | 1173525   | C13H8F3N5O2S | (M+H)+      | -2.26                |
| 357.0465 | 357.0449  | 1      | 192606    | C13H8F3N5O2S | (M+H)+      | -4.47                |
| 358.0416 | 358.0407  | 1      | 67591     | C13H8F3N5O2S | (M+H)+      | -2.58                |
| 359.0417 | 359.0422  | 1      | 9398      | C13H8F3N5O2S | (M+H)+      | 1.33                 |

--- End Of Report ---

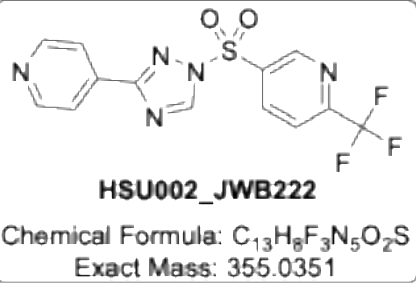

Sample Name  
User Name  
Sample Type  
ACQ Method

CPT03  
Sample  
Acq 100 ACN.m

Position  
Inj Vol  
IRM Calibration Status  
Comment

P1-A1  
0.1  
Success

Instrument Name  
InjPosition  
Data Filename  
Acquired Time

Instrument 1  
CPT03.d  
2/17/2022 10:19:34 AM (UTC-05:00)

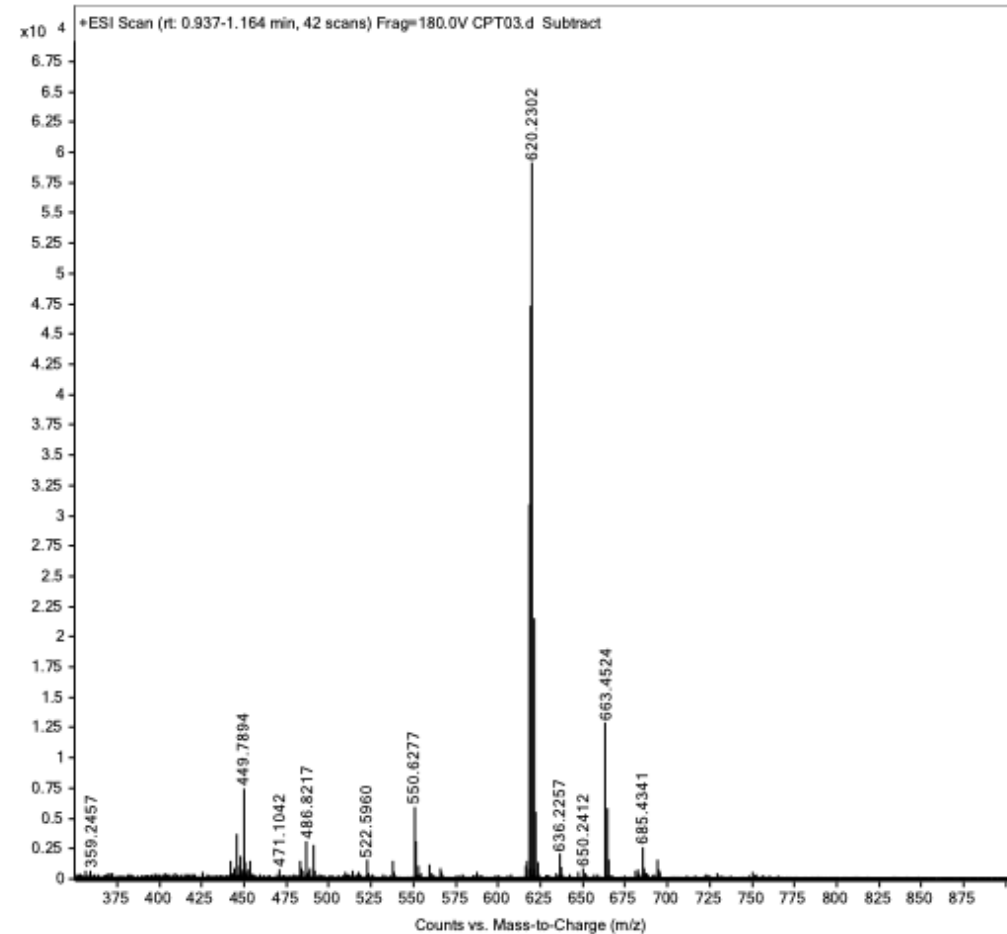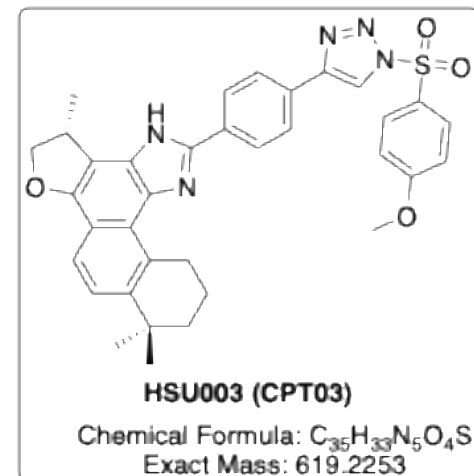

# Target Compound Screening Report

## Results Acquired by The University of Texas at Austin Mass Spectrometry Facility

**Data File** MSF25-2044(JWB-226)\_hrESIpos1.d **Sample Name** 2044(JWB-226) **Comment** 2044(JWB-226)  
**Position** P1-B2 **Instrument Name** 6530 **User Name**  
**Acq Method** FIA\_pos.m **Acquired Time** 11/24/2025 2:10:01 PM **DA Method** MSF.m

### MS Zoomed Spectrum

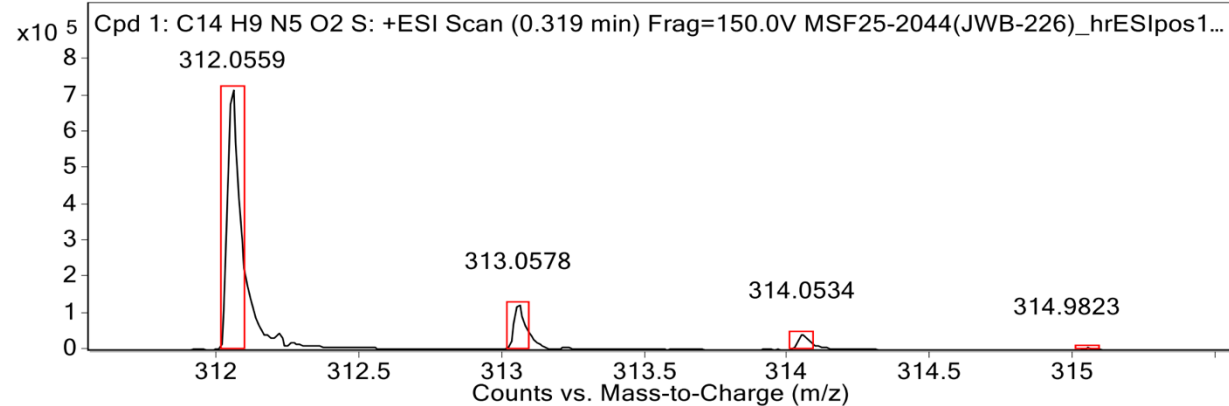

### MS Spectrum Peak List

| Obs. m/z | Calc. m/z | Charge | Abundance | Formula                                                        | Ion Species        | Tgt Mass Error (ppm) |
|----------|-----------|--------|-----------|----------------------------------------------------------------|--------------------|----------------------|
| 312.0559 | 312.0550  | 1      | 724030    | C <sub>14</sub> H <sub>9</sub> N <sub>5</sub> O <sub>2</sub> S | (M+H) <sup>+</sup> | -2.87                |
| 313.0578 | 313.0575  | 1      | 126193    | C <sub>14</sub> H <sub>9</sub> N <sub>5</sub> O <sub>2</sub> S | (M+H) <sup>+</sup> | -0.72                |
| 314.0534 | 314.0535  | 1      | 45243     | C <sub>14</sub> H <sub>9</sub> N <sub>5</sub> O <sub>2</sub> S | (M+H) <sup>+</sup> | 0.4                  |
| 315.9266 | 316.0561  | 1      | 599       | C <sub>14</sub> H <sub>9</sub> N <sub>5</sub> O <sub>2</sub> S | (M+H) <sup>+</sup> | 409.74               |
| 316.8873 | 317.0575  | 1      | 484       | C <sub>14</sub> H <sub>9</sub> N <sub>5</sub> O <sub>2</sub> S | (M+H) <sup>+</sup> | 537.24               |

--- End Of Report ---

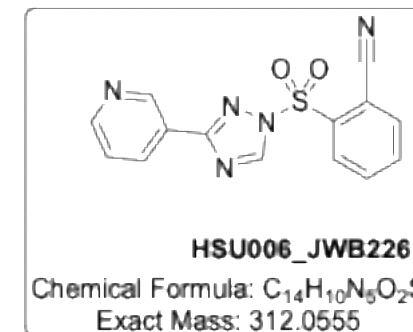

# Target Compound Screening Report

## Results Acquired by The University of Texas at Austin Mass Spectrometry Facility

**Data File** MSF25-2063(JWB228)\_hrESIpos1.d      **Sample Name** 2063(JWB228)      **Comment** 2063(JWB228)  
**Position** P1-D3      **Instrument Name** 6530      **User Name**  
**Acq Method** FIA\_pos.m      **Acquired Time** 12/4/2025 10:47:54 AM      **DA Method** MSF.m

MS Zoomed Spectrum

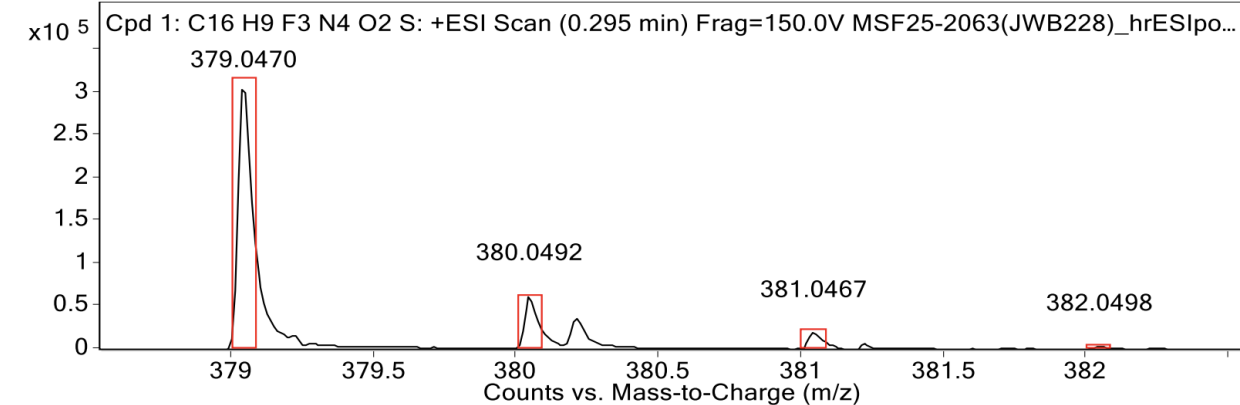

### MS Spectrum Peak List

| Obs. m/z | Calc. m/z | Charge | Abundance | Formula                                                                       | Ion Species        | Tgt Mass Error (ppm) |
|----------|-----------|--------|-----------|-------------------------------------------------------------------------------|--------------------|----------------------|
| 302.1529 |           |        | 1704604   |                                                                               |                    |                      |
| 379.0470 | 379.0471  | 1      | 315264    | C <sub>16</sub> H <sub>9</sub> F <sub>3</sub> N <sub>4</sub> O <sub>2</sub> S | (M+H) <sup>+</sup> | 0.19                 |
| 380.0492 | 380.0499  | 1      | 62977     | C <sub>16</sub> H <sub>9</sub> F <sub>3</sub> N <sub>4</sub> O <sub>2</sub> S | (M+H) <sup>+</sup> | 1.74                 |
| 381.0467 | 381.0461  | 1      | 19793     | C <sub>16</sub> H <sub>9</sub> F <sub>3</sub> N <sub>4</sub> O <sub>2</sub> S | (M+H) <sup>+</sup> | -1.64                |
| 382.0498 | 382.0474  | 1      | 4104      | C <sub>16</sub> H <sub>9</sub> F <sub>3</sub> N <sub>4</sub> O <sub>2</sub> S | (M+H) <sup>+</sup> | -6.17                |

--- End Of Report ---

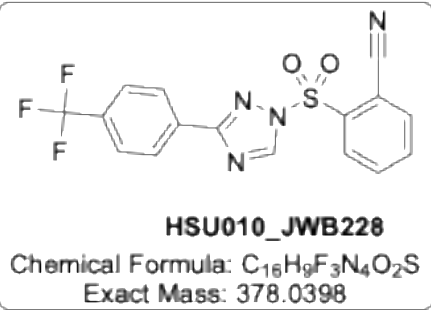

# Target Compound Screening Report

## Results Acquired by The University of Texas at Austin Mass Spectrometry Facility

**Data File** MSF25-2037(AHL-041)\_hrESIposLC1.d      **Sample Name** 2037(AHL-041)      **Comment** 2037(AHL-041)  
**Position** P1-A4      **Instrument Name** 6530      **User Name**  
**Acq Method** LC\_C18\_pos\_jl.m      **Acquired Time** 11/24/2025 3:33:43 PM      **DA Method** MSF.m

MS Zoomed Spectrum

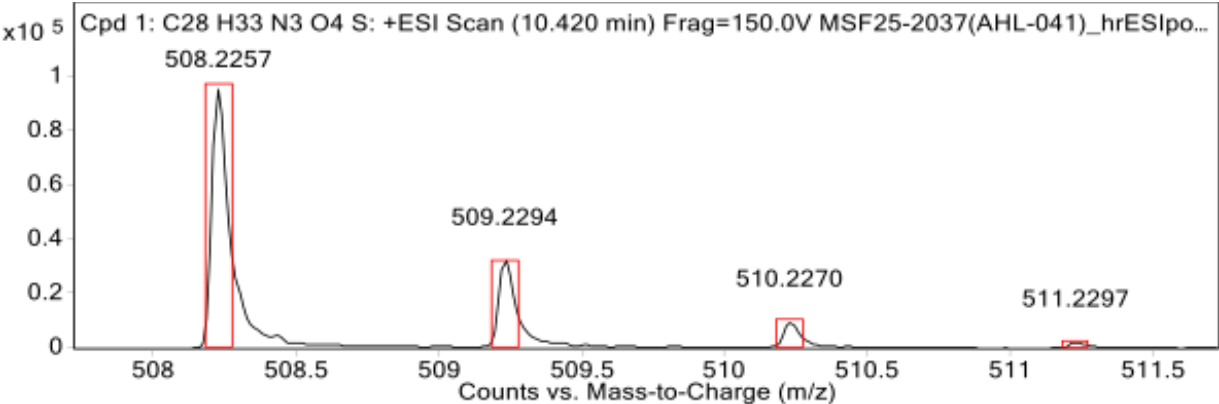

### MS Spectrum Peak List

| Obs. m/z | Calc. m/z | Charge | Abundance | Formula                                                         | Ion Species        | Tgt Mass Error (ppm) |
|----------|-----------|--------|-----------|-----------------------------------------------------------------|--------------------|----------------------|
| 508.2257 | 508.2265  | 1      | 95809     | C <sub>28</sub> H <sub>33</sub> N <sub>3</sub> O <sub>4</sub> S | (M+H) <sup>+</sup> | 1.44                 |
| 509.2294 | 509.2295  | 1      | 32568     | C <sub>28</sub> H <sub>33</sub> N <sub>3</sub> O <sub>4</sub> S | (M+H) <sup>+</sup> | 0.2                  |
| 510.2270 | 510.2280  | 1      | 9952      | C <sub>28</sub> H <sub>33</sub> N <sub>3</sub> O <sub>4</sub> S | (M+H) <sup>+</sup> | 2.08                 |
| 511.2297 | 511.2289  | 1      | 2526      | C <sub>28</sub> H <sub>33</sub> N <sub>3</sub> O <sub>4</sub> S | (M+H) <sup>+</sup> | -1.59                |
| 512.2447 | 512.2303  | 1      | 442       | C <sub>28</sub> H <sub>33</sub> N <sub>3</sub> O <sub>4</sub> S | (M+H) <sup>+</sup> | -28.12               |

--- End Of Report ---

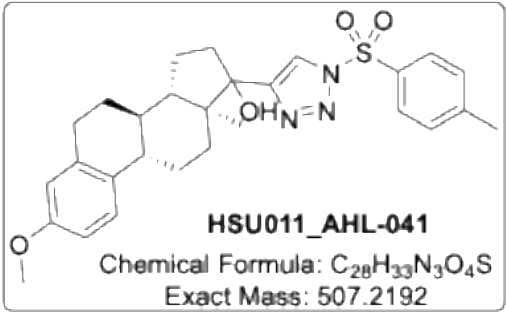

## Target Compound Screening Report

### Results Acquired by The University of Texas at Austin Mass Spectrometry Facility

**Data File** MSF25-2087(AHL011)\_hrESIposLC1.d **Sample Name** 2087(AHL011) **Comment** 2087(AHL011)  
**Position** P1-C5 **Instrument Name** 6530 **User Name**  
**Acq Method** LC\_C18\_pos\_jl.m **Acquired Time** 12/4/2025 5:48:51 PM **DA Method** MSF.m

#### MS Zoomed Spectrum

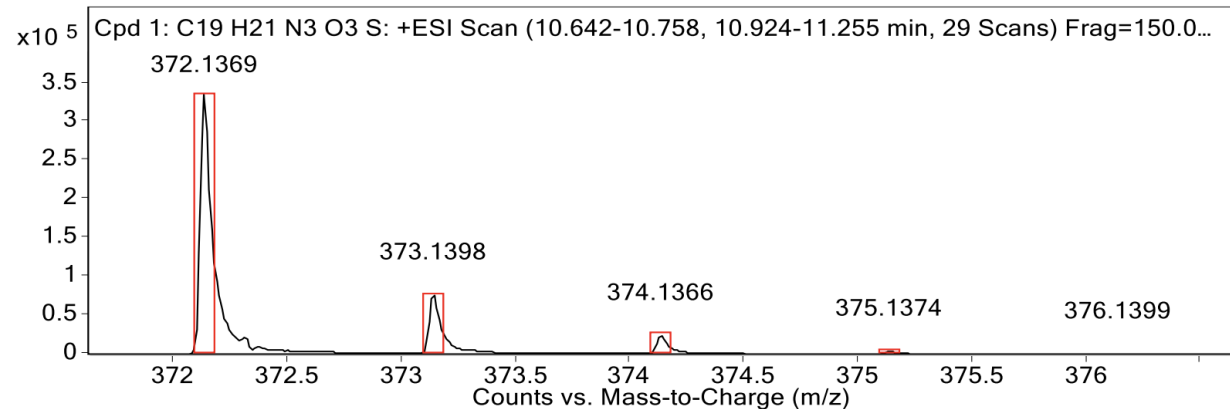

#### MS Spectrum Peak List

| Obs. m/z | Calc. m/z | Charge | Abundance | Formula                                                         | Ion Species        | Tgt Mass Error (ppm) |
|----------|-----------|--------|-----------|-----------------------------------------------------------------|--------------------|----------------------|
| 372.1369 | 372.1376  | 1      | 335642    | C <sub>19</sub> H <sub>21</sub> N <sub>3</sub> O <sub>3</sub> S | (M+H) <sup>+</sup> | 2.04                 |
| 373.1398 | 373.1406  | 1      | 76837     | C <sub>19</sub> H <sub>21</sub> N <sub>3</sub> O <sub>3</sub> S | (M+H) <sup>+</sup> | 2.21                 |
| 374.1366 | 374.1374  | 1      | 24236     | C <sub>19</sub> H <sub>21</sub> N <sub>3</sub> O <sub>3</sub> S | (M+H) <sup>+</sup> | 2.16                 |
| 375.1374 | 375.1387  | 1      | 4089      | C <sub>19</sub> H <sub>21</sub> N <sub>3</sub> O <sub>3</sub> S | (M+H) <sup>+</sup> | 3.41                 |
| 376.1399 | 376.1401  | 1      | 497       | C <sub>19</sub> H <sub>21</sub> N <sub>3</sub> O <sub>3</sub> S | (M+H) <sup>+</sup> | 0.66                 |

--- End Of Report ---

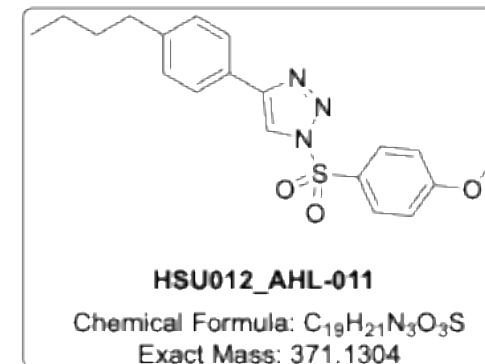



Target Compound Screening Report

Results Acquired by The University of Texas at Austin Mass Spectrometry Facility

Data File MSF25-2063(AHL015)\_hrESIpos1.d      Sample Name 2063(AHL015)      Comment 2063(AHL015)  
Position P1-E2      Instrument Name 6530      User Name  
Acq Method FIA\_pos.m      Acquired Time 12/4/2025 11:04:01 AM      DA Method MSF.m

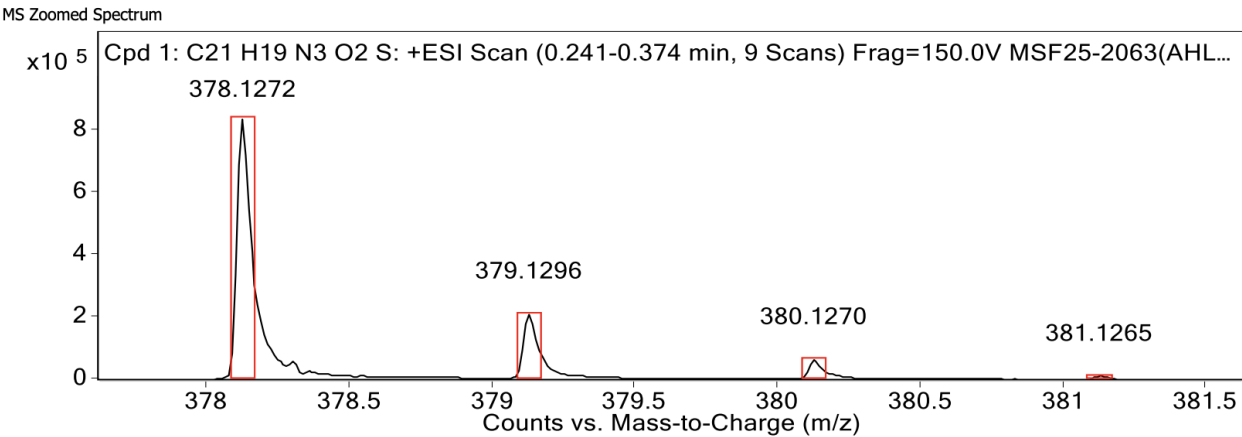

MS Spectrum Peak List

| Obs. m/z | Calc. m/z | Charge | Abundance | Formula     | Ion Species | Tgt Mass Error (ppm) |
|----------|-----------|--------|-----------|-------------|-------------|----------------------|
| 372.1022 |           |        | 3559317   |             |             |                      |
| 378.1272 | 378.1271  | 1      | 834563    | C21H19N3O2S | (M+H)+      | -0.35                |
| 379.1296 | 379.1301  | 1      | 210880    | C21H19N3O2S | (M+H)+      | 1.26                 |
| 380.1270 | 380.1272  | 1      | 64437     | C21H19N3O2S | (M+H)+      | 0.35                 |
| 381.1265 | 381.1282  | 1      | 10923     | C21H19N3O2S | (M+H)+      | 4.28                 |

--- End Of Report ---

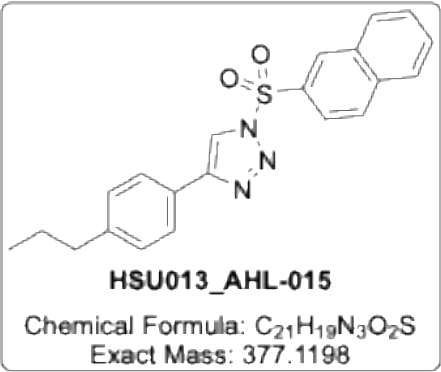

# Target Screening Report

## Results Acquired by The University of Texas at Austin Mass Spectrometry Facility

|                           |                                 |                        |                                   |                  |              |
|---------------------------|---------------------------------|------------------------|-----------------------------------|------------------|--------------|
| <b>Data File</b>          | MSF25-2099(EKT116).hrESIspos1.d | <b>Sample Name</b>     | 2099(EKT116)                      | <b>Comment</b>   | 2099(EKT116) |
| <b>Position</b>           | P1-P3                           | <b>Instrument Name</b> | Instrument 1                      |                  |              |
| <b>Acquisition Method</b> | FIA_Pos.m                       | <b>Acquired Time</b>   | 12/15/2025 5:16:48 PM (UTC-06:00) | <b>DA Method</b> | MSF.m        |

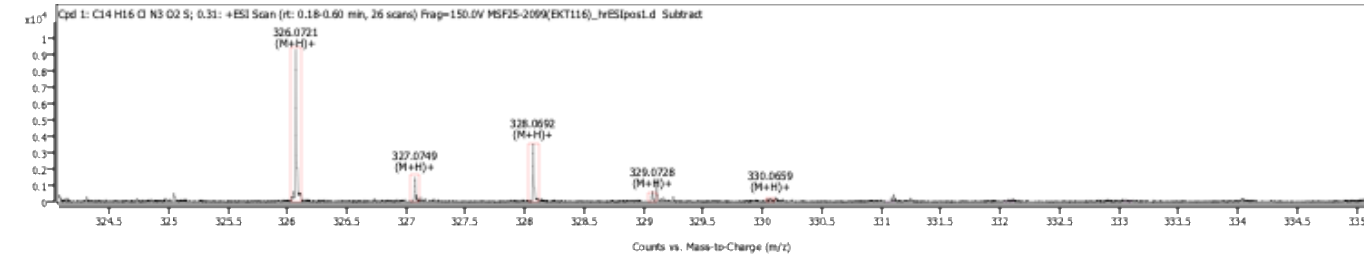

### Spectrum Peaks

| Obs. m/z | Calc. m/z | Charge | Abund   | Formula       | Ion Species | Tgt Mass Error (PPM) |
|----------|-----------|--------|---------|---------------|-------------|----------------------|
| 326.0721 | 326.0725  | 1      | 9354    | C14H16ClN3O2S | (M+H)+      | -1.17                |
| 327.0749 | 327.0753  | 1      | 1485    | C14H16ClN3O2S | (M+H)+      | -1.26                |
| 328.0692 | 328.0697  | 1      | 3574    | C14H16ClN3O2S | (M+H)+      | -1.57                |
| 329.0728 | 329.0724  | 1      | 632     | C14H16ClN3O2S | (M+H)+      | 1.39                 |
| 330.0659 | 330.0683  | 1      | 197     | C14H16ClN3O2S | (M+H)+      | -7.27                |
| 130.1590 |           |        | 8001873 |               |             |                      |

MassHunter Qual 10.0  
(End of Report)

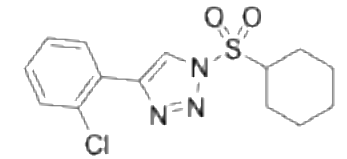

**HSU014\_EKT116**

Chemical Formula: C<sub>14</sub>H<sub>16</sub>ClN<sub>3</sub>O<sub>2</sub>S  
Exact Mass: 325.0652

## Target Compound Screening Report

### Results Acquired by The University of Texas at Austin Mass Spectrometry Facility

**Data File** MSF25-2063(EKT151)\_hrESIposLC1.d  
**Position** P1-D8  
**Acq Method** LC\_C18\_pos\_jl.m  
**Sample Name** 2063(EKT151)  
**Instrument Name** 6530  
**Acquired Time** 12/4/2025 10:01:33 PM  
**Comment** 2063(EKT151)  
**User Name**  
**DA Method** MSF.m

MS Zoomed Spectrum

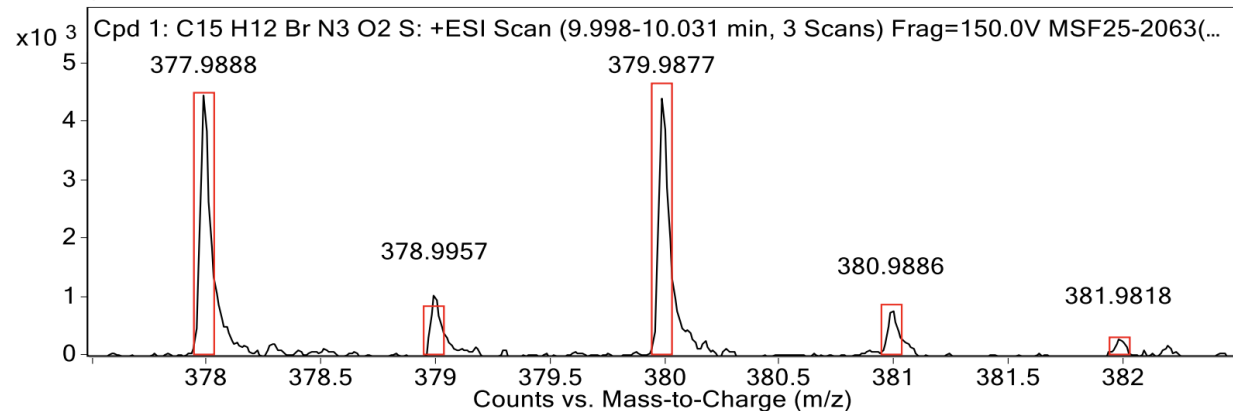

MS Spectrum Peak List

| Obs. m/z | Calc. m/z | Charge | Abundance | Formula                                                           | Ion Species        | Tgt Mass Error (ppm) |
|----------|-----------|--------|-----------|-------------------------------------------------------------------|--------------------|----------------------|
| 377.9888 | 377.9906  | 1      | 4475      | C <sub>15</sub> H <sub>12</sub> BrN <sub>3</sub> O <sub>2</sub> S | (M+H) <sup>+</sup> | 4.78                 |
| 378.9957 | 378.9935  | 1      | 1048      | C <sub>15</sub> H <sub>12</sub> BrN <sub>3</sub> O <sub>2</sub> S | (M+H) <sup>+</sup> | -5.96                |
| 379.9877 | 379.9886  | 1      | 4426      | C <sub>15</sub> H <sub>12</sub> BrN <sub>3</sub> O <sub>2</sub> S | (M+H) <sup>+</sup> | 2.36                 |
| 380.9886 | 380.9914  | 1      | 794       | C <sub>15</sub> H <sub>12</sub> BrN <sub>3</sub> O <sub>2</sub> S | (M+H) <sup>+</sup> | 7.42                 |
| 381.9818 | 381.9874  | 1      | 287       | C <sub>15</sub> H <sub>12</sub> BrN <sub>3</sub> O <sub>2</sub> S | (M+H) <sup>+</sup> | 14.61                |
| 922.0021 |           |        | 59582     |                                                                   |                    |                      |

--- End Of Report ---

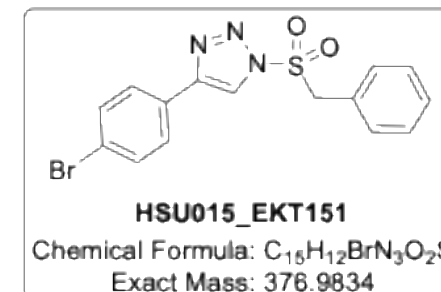

# Target Compound Screening Report

## Results Acquired by The University of Texas at Austin Mass Spectrometry Facility

**Data File** MSF25-2039(EKT-165)\_hrESIpos1.d      **Sample Name** 2039(EKT-165)      **Comment** 2039(EKT-165)  
**Position** P1-A6      **Instrument Name** 6530      **User Name**  
**Acq Method** FIA\_pos.m      **Acquired Time** 11/24/2025 1:59:51 PM      **DA Method** MSF.m

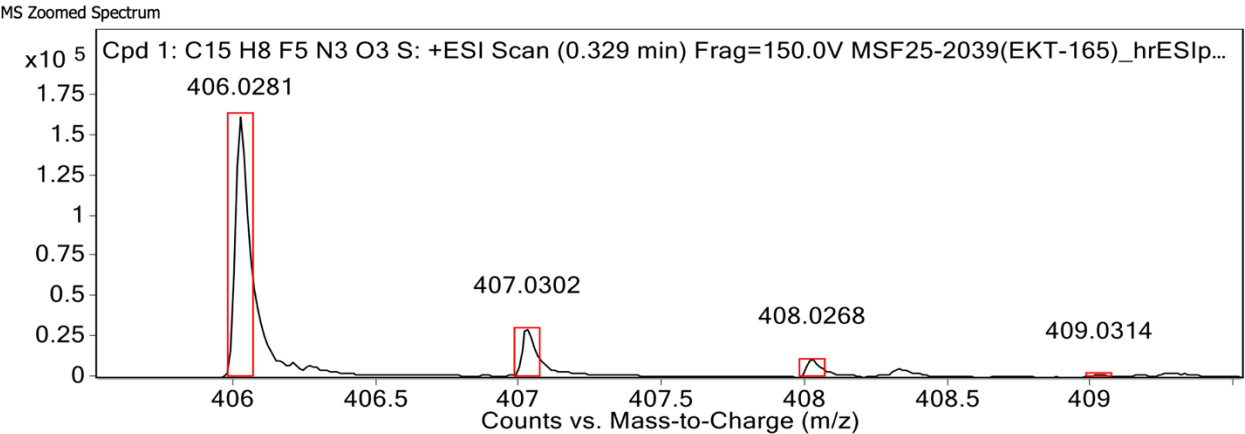

### MS Spectrum Peak List

| Obs. m/z | Calc. m/z | Charge | Abundance | Formula                                                                       | Ion Species        | Tgt Mass Error (ppm) |
|----------|-----------|--------|-----------|-------------------------------------------------------------------------------|--------------------|----------------------|
| 406.0281 | 406.0279  | 1      | 161689    | C <sub>15</sub> H <sub>8</sub> F <sub>5</sub> N <sub>3</sub> O <sub>3</sub> S | (M+H) <sup>+</sup> | -0.33                |
| 407.0302 | 407.0308  | 1      | 30496     | C <sub>15</sub> H <sub>8</sub> F <sub>5</sub> N <sub>3</sub> O <sub>3</sub> S | (M+H) <sup>+</sup> | 1.44                 |
| 408.0268 | 408.0268  | 1      | 11438     | C <sub>15</sub> H <sub>8</sub> F <sub>5</sub> N <sub>3</sub> O <sub>3</sub> S | (M+H) <sup>+</sup> | 0.17                 |
| 409.0314 | 409.0285  | 1      | 2202      | C <sub>15</sub> H <sub>8</sub> F <sub>5</sub> N <sub>3</sub> O <sub>3</sub> S | (M+H) <sup>+</sup> | -7.02                |
| 409.9521 | 410.0297  | 1      | 261       | C <sub>15</sub> H <sub>8</sub> F <sub>5</sub> N <sub>3</sub> O <sub>3</sub> S | (M+H) <sup>+</sup> | 189.15               |

--- End Of Report ---

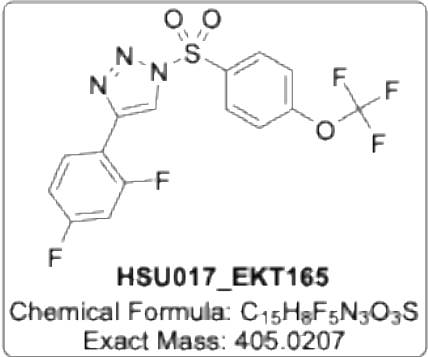

## Target Compound Screening Report

### Results Acquired by The University of Texas at Austin Mass Spectrometry Facility

**Data File** MSF25-2063(EKT122)\_hrESIposLC1.d **Sample Name** 2063(EKT122) **Comment** 2063(EKT122)  
**Position** P1-D7 **Instrument Name** 6530 **User Name**  
**Acq Method** LC\_C18\_pos\_jl.m **Acquired Time** 12/4/2025 1:36:37 PM **DA Method** MSF.m

MS Zoomed Spectrum

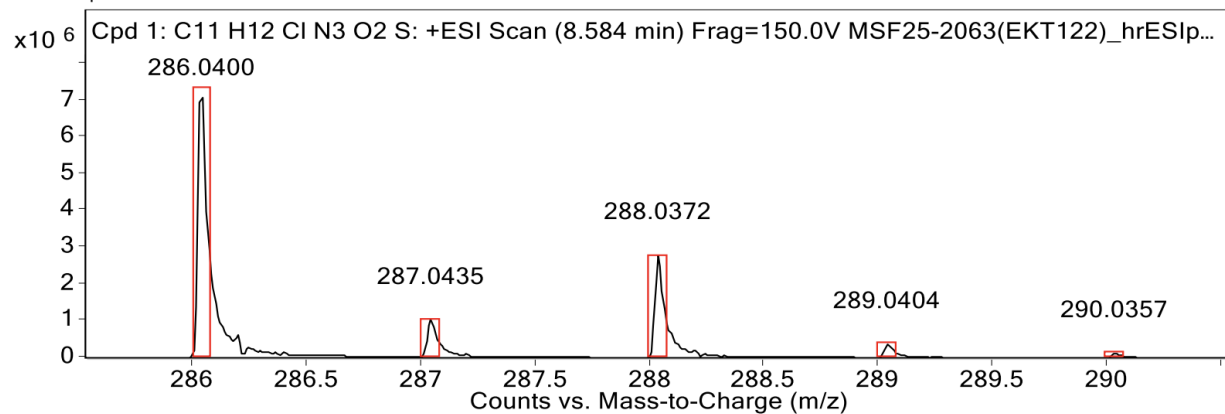

MS Spectrum Peak List

| Obs. m/z | Calc. m/z | Charge | Abundance | Formula                                                           | Ion Species        | Tgt Mass Error (ppm) |
|----------|-----------|--------|-----------|-------------------------------------------------------------------|--------------------|----------------------|
| 180.0313 |           |        | 9057772   |                                                                   |                    |                      |
| 286.0400 | 286.0412  | 1      | 7222646   | C <sub>11</sub> H <sub>12</sub> ClN <sub>3</sub> O <sub>2</sub> S | (M+H) <sup>+</sup> | 3.99                 |
| 287.0435 | 287.0438  | 1      | 1044582   | C <sub>11</sub> H <sub>12</sub> ClN <sub>3</sub> O <sub>2</sub> S | (M+H) <sup>+</sup> | 1.01                 |
| 288.0372 | 288.0383  | 1      | 2811036   | C <sub>11</sub> H <sub>12</sub> ClN <sub>3</sub> O <sub>2</sub> S | (M+H) <sup>+</sup> | 4.1                  |
| 289.0404 | 289.0409  | 1      | 388823    | C <sub>11</sub> H <sub>12</sub> ClN <sub>3</sub> O <sub>2</sub> S | (M+H) <sup>+</sup> | 1.73                 |
| 290.0357 | 290.0363  | 1      | 141438    | C <sub>11</sub> H <sub>12</sub> ClN <sub>3</sub> O <sub>2</sub> S | (M+H) <sup>+</sup> | 1.97                 |

--- End Of Report ---

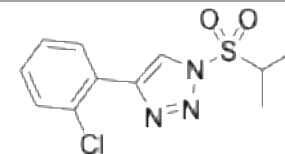

**HSU019\_EKT122**

Chemical Formula: C<sub>11</sub>H<sub>12</sub>ClN<sub>3</sub>O<sub>2</sub>S  
Exact Mass: 285.0339

# Target Compound Screening Report

## Results Acquired by The University of Texas at Austin Mass Spectrometry Facility

**Data File** MSF25-2063(EKT080)\_hrESIpos1.d **Sample Name** 2063(EKT080) **Comment** 2063(EKT080)  
**Position** P1-D6 **Instrument Name** 6530 **User Name**  
**Acq Method** FIA\_pos.m **Acquired Time** 12/4/2025 10:53:57 AM **DA Method** MSF.m

MS Zoomed Spectrum

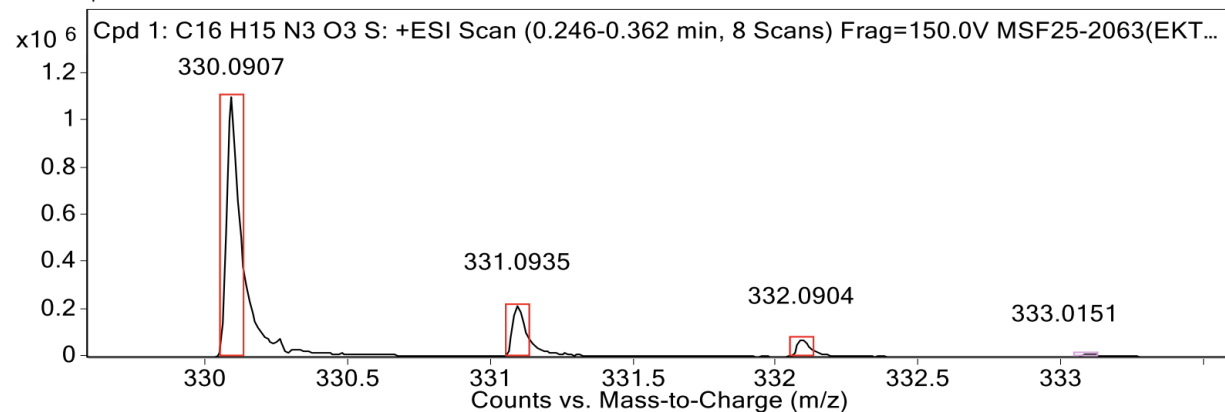

MS Spectrum Peak List

| Obs. m/z | Calc. m/z | Charge | Abundance | Formula                                                         | Ion Species        | Tgt Mass Error (ppm) |
|----------|-----------|--------|-----------|-----------------------------------------------------------------|--------------------|----------------------|
| 330.0907 | 330.0907  | 1      | 1106115   | C <sub>16</sub> H <sub>15</sub> N <sub>3</sub> O <sub>3</sub> S | (M+H) <sup>+</sup> | -0.07                |
| 331.0935 | 331.0936  | 1      | 220098    | C <sub>16</sub> H <sub>15</sub> N <sub>3</sub> O <sub>3</sub> S | (M+H) <sup>+</sup> | 0.11                 |
| 332.0904 | 332.0898  | 1      | 75988     | C <sub>16</sub> H <sub>15</sub> N <sub>3</sub> O <sub>3</sub> S | (M+H) <sup>+</sup> | -1.58                |
| 333.0151 | 333.0914  | 1      | 825       | C <sub>16</sub> H <sub>15</sub> N <sub>3</sub> O <sub>3</sub> S | (M+H) <sup>+</sup> | 228.98               |

--- End Of Report ---

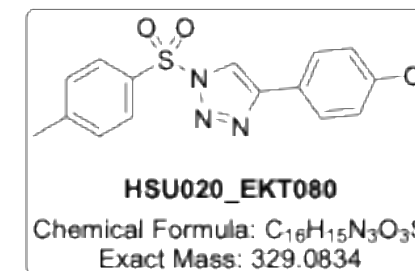

## Target Compound Screening Report

### Results Acquired by The University of Texas at Austin Mass Spectrometry Facility

Data File MSF25-2038(EKT-101)\_hrESIpos1.d Sample Name 2038(EKT-101) Comment 2038(EKT-101)  
Position P1-A5 Instrument Name 6530 User Name  
Acq Method FIA\_pos.m Acquired Time 11/24/2025 1:57:48 PM DA Method MSF.m

MS Zoomed Spectrum

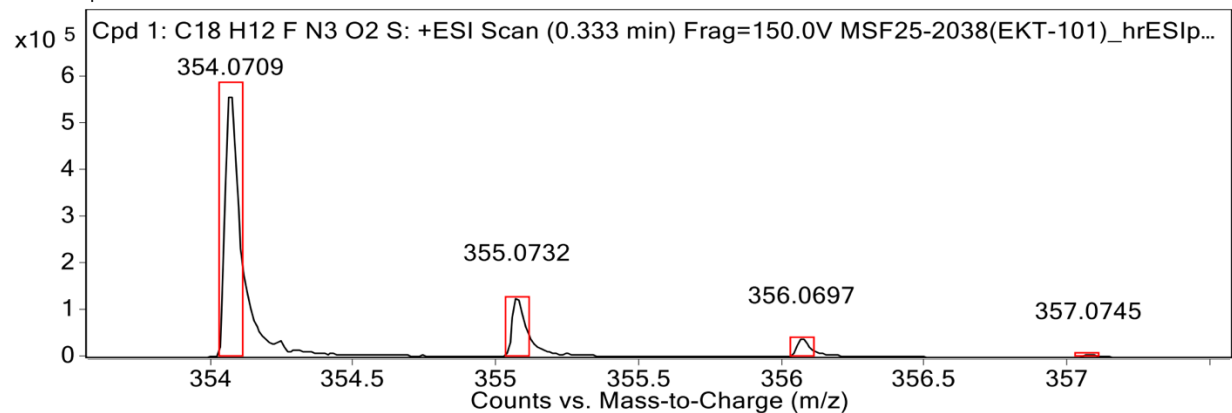

#### MS Spectrum Peak List

| Obs. m/z | Calc. m/z | Charge | Abundance | Formula                                                          | Ion Species        | Tgt Mass Error (ppm) |
|----------|-----------|--------|-----------|------------------------------------------------------------------|--------------------|----------------------|
| 354.0709 | 354.0707  | 1      | 581540    | C <sub>18</sub> H <sub>12</sub> FN <sub>3</sub> O <sub>2</sub> S | (M+H) <sup>+</sup> | -0.48                |
| 355.0732 | 355.0736  | 1      | 131547    | C <sub>18</sub> H <sub>12</sub> FN <sub>3</sub> O <sub>2</sub> S | (M+H) <sup>+</sup> | 1.07                 |
| 356.0697 | 356.0701  | 1      | 40099     | C <sub>18</sub> H <sub>12</sub> FN <sub>3</sub> O <sub>2</sub> S | (M+H) <sup>+</sup> | 1.19                 |
| 357.0745 | 357.0714  | 1      | 6318      | C <sub>18</sub> H <sub>12</sub> FN <sub>3</sub> O <sub>2</sub> S | (M+H) <sup>+</sup> | -8.55                |
| 364.0203 |           |        | 1881949   |                                                                  |                    |                      |

--- End Of Report ---

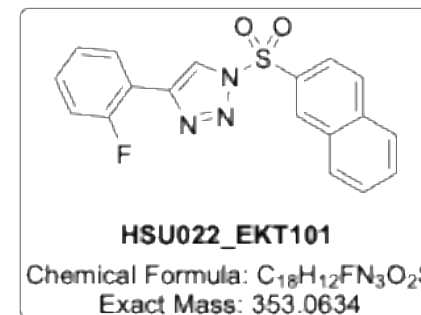

# Target Screening Report

## Results Acquired by The University of Texas at Austin Mass Spectrometry Facility

|                           |                                |                        |                                   |                  |              |
|---------------------------|--------------------------------|------------------------|-----------------------------------|------------------|--------------|
| <b>Data File</b>          | MSF25-2099(AHL009)_hrES(pos1.d | <b>Sample Name</b>     | 2099(AHL009)                      | <b>Comment</b>   | 2099(AHL009) |
| <b>Position</b>           | P1-E6                          | <b>Instrument Name</b> | Instrument 1                      |                  |              |
| <b>Acquisition Method</b> | FIA_Pos.m                      | <b>Acquired Time</b>   | 12/15/2025 5:07:02 PM (UTC-06:00) | <b>DA Method</b> | MSF.m        |

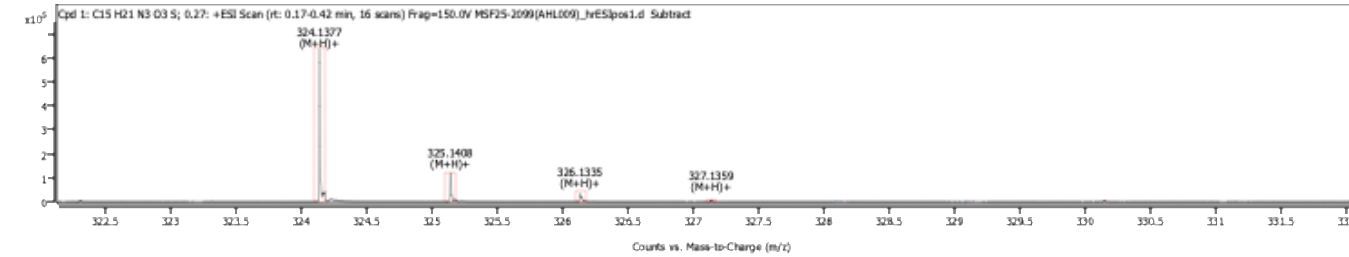

### Spectrum Peaks

| Obs. m/z | Calc. m/z | Charge | Abund   | Formula     | Ion Species | Tgt Mass Error (PPM) |
|----------|-----------|--------|---------|-------------|-------------|----------------------|
| 324.1377 | 324.1376  | 1      | 940805  | C15H21N3O3S | (M+H)+      | 0.15                 |
| 325.1408 | 325.1405  | 1      | 122866  | C15H21N3O3S | (M+H)+      | 0.81                 |
| 326.1335 | 326.1366  | 1      | 34437   | C15H21N3O3S | (M+H)+      | -9.34                |
| 327.1359 | 327.1383  | 1      | 5528    | C15H21N3O3S | (M+H)+      | -7.10                |
| 130.1590 |           |        | 1107853 |             |             |                      |

MassHunter Qual 10.0  
(End of Report)

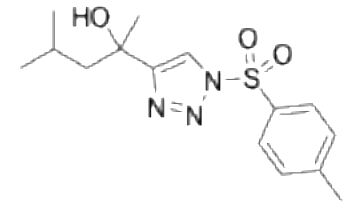

**HSU024\_AHL-009**  
Chemical Formula: C<sub>15</sub>H<sub>21</sub>N<sub>3</sub>O<sub>3</sub>S  
Exact Mass: 323.1304



# Target Compound Screening Report

## Results Acquired by The University of Texas at Austin Mass Spectrometry Facility

**Data File** MSF25-2063(JWB164)\_hrESIposLC1.d **Sample Name** 2063(JWB164) **Comment** 2063(JWB164)  
**Position** P1-C9 **Instrument Name** 6530 **User Name**  
**Acq Method** LC\_C18\_pos\_jl.m **Acquired Time** 12/4/2025 12:50:41 PM **DA Method** MSF.m

### MS Zoomed Spectrum

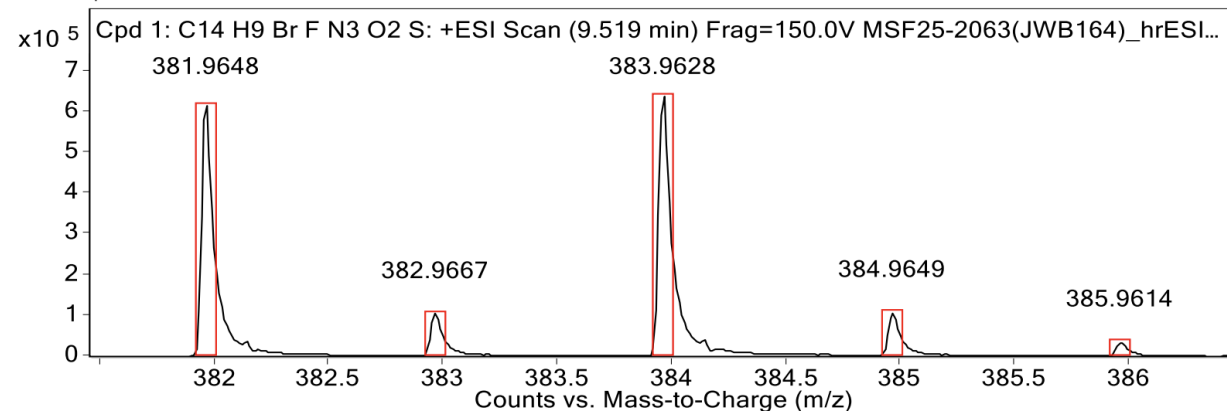

### MS Spectrum Peak List

| Obs. m/z | Calc. m/z | Charge | Abundance | Formula       | Ion Species | Tgt Mass Error (ppm) |
|----------|-----------|--------|-----------|---------------|-------------|----------------------|
| 381.9648 | 381.9656  | 1      | 619445    | C14H9BrFN3O2S | (M+H)+      | 1.99                 |
| 382.9667 | 382.9684  | 1      | 105565    | C14H9BrFN3O2S | (M+H)+      | 4.22                 |
| 383.9628 | 383.9636  | 1      | 642132    | C14H9BrFN3O2S | (M+H)+      | 1.92                 |
| 384.9649 | 384.9663  | 1      | 108586    | C14H9BrFN3O2S | (M+H)+      | 3.5                  |
| 385.9614 | 385.9621  | 1      | 36185     | C14H9BrFN3O2S | (M+H)+      | 1.79                 |
| 386.9641 | 386.9638  | 1      | 4732      | C14H9BrFN3O2S | (M+H)+      | -0.84                |

--- End Of Report ---

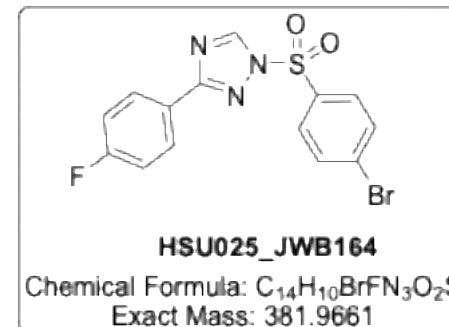

## Target Compound Screening Report

### Results Acquired by The University of Texas at Austin Mass Spectrometry Facility

Data File MSF25-2041(JWB-154)\_hrESIpos1.d Sample Name 2041(JWB-154) Comment 2041(JWB-154)  
Position P1-A8 Instrument Name 6530 User Name  
Acq Method FIA\_pos.m Acquired Time 11/24/2025 2:03:59 PM DA Method MSF.m

#### MS Zoomed Spectrum

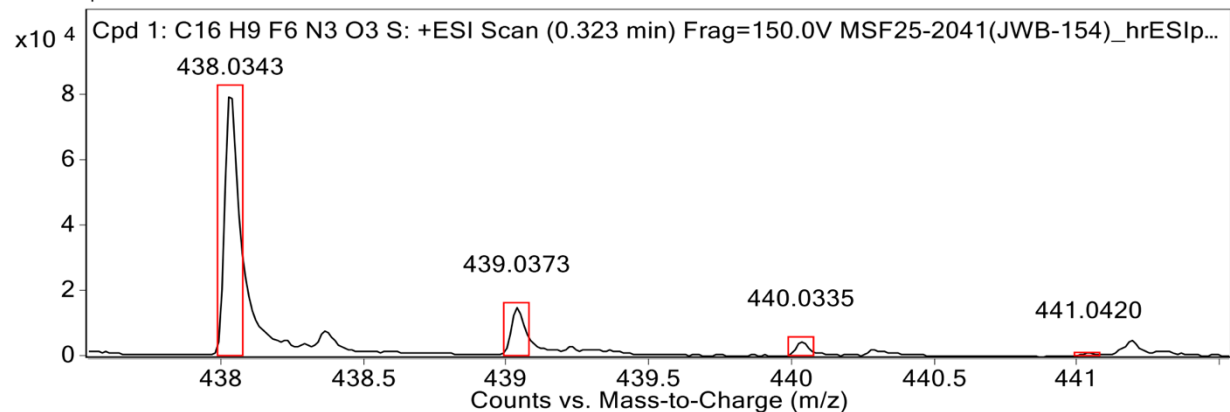

#### MS Spectrum Peak List

| Obs. m/z | Calc. m/z | Charge | Abundance | Formula                                                                       | Ion Species        | Tgt Mass Error (ppm) |
|----------|-----------|--------|-----------|-------------------------------------------------------------------------------|--------------------|----------------------|
| 436.3627 |           |        | 98431     |                                                                               |                    |                      |
| 438.0343 | 438.0342  | 1      | 82450     | C <sub>16</sub> H <sub>9</sub> F <sub>6</sub> N <sub>3</sub> O <sub>3</sub> S | (M+H) <sup>+</sup> | -0.35                |
| 439.0373 | 439.0370  | 1      | 15163     | C <sub>16</sub> H <sub>9</sub> F <sub>6</sub> N <sub>3</sub> O <sub>3</sub> S | (M+H) <sup>+</sup> | -0.66                |
| 440.0335 | 440.0333  | 1      | 4733      | C <sub>16</sub> H <sub>9</sub> F <sub>6</sub> N <sub>3</sub> O <sub>3</sub> S | (M+H) <sup>+</sup> | -0.41                |
| 441.0420 | 441.0348  | 1      | 1091      | C <sub>16</sub> H <sub>9</sub> F <sub>6</sub> N <sub>3</sub> O <sub>3</sub> S | (M+H) <sup>+</sup> | -16.3                |

--- End Of Report ---

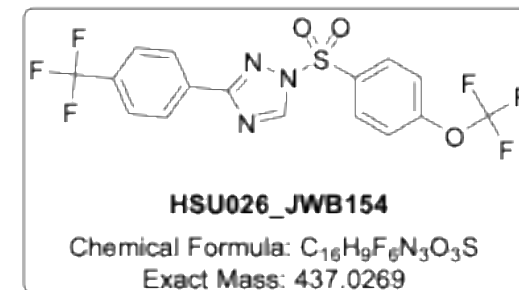

# Target Screening Report

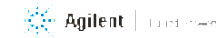

## Results Acquired by The University of Texas at Austin Mass Spectrometry Facility

|                    |                                |                 |                                   |           |             |
|--------------------|--------------------------------|-----------------|-----------------------------------|-----------|-------------|
| Data File          | MSF25-2099_JWB167_hrESIspos1.d | Sample Name     | 2099_JWB167                       | Comment   | 2099_JWB167 |
| Position           | P1-F5                          | Instrument Name | Instrument 1                      |           |             |
| Acquisition Method | FIA_Pos.m                      | Acquired Time   | 12/15/2025 5:20:03 PM (UTC-06:00) | DA Method | MSF.m       |

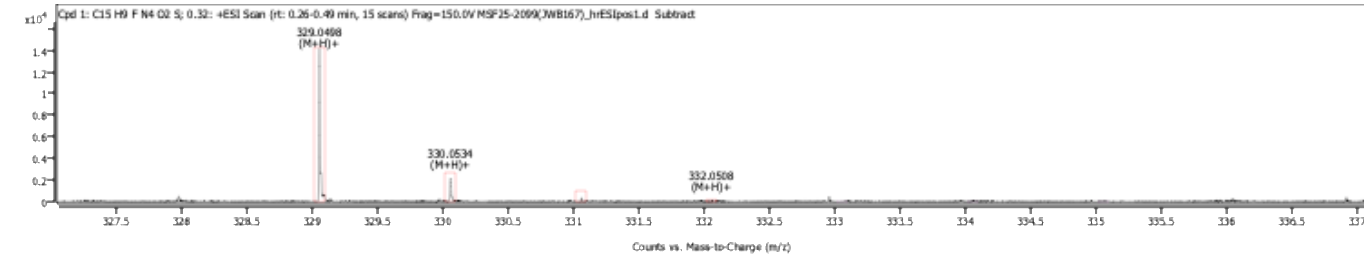

### Spectrum Peaks

| Obs. m/z | Calc. m/z | Charge | Abund   | Formula     | Ion Species | Tgt Mass Error (PPM) |
|----------|-----------|--------|---------|-------------|-------------|----------------------|
| 329.0498 | 329.0503  | 1      | 14190   | C15H9FN4O2S | (M+H)+      | -1.52                |
| 330.0534 | 330.0530  | 1      | 2114    | C15H9FN4O2S | (M+H)+      | 1.16                 |
| 332.0508 | 332.0505  | 1      | 51      | C15H9FN4O2S | (M+H)+      | 0.93                 |
| 130.1990 |           |        | 6756261 |             |             |                      |

MassHunter Qual 10.0  
(End of Report)

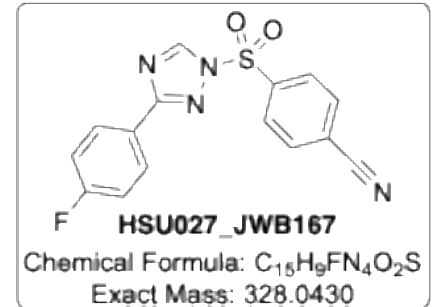

## Target Compound Screening Report

### Results Acquired by The University of Texas at Austin Mass Spectrometry Facility

**Data File** MSF25-2043(JWB-224)\_hrESIpos1.d **Sample Name** 2043(JWB-224) **Comment** 2043(JWB-224)  
**Position** P1-B1 **Instrument Name** 6530 **User Name**  
**Acq Method** FIA\_pos.m **Acquired Time** 11/24/2025 2:08:00 PM **DA Method** MSF.m

#### MS Zoomed Spectrum

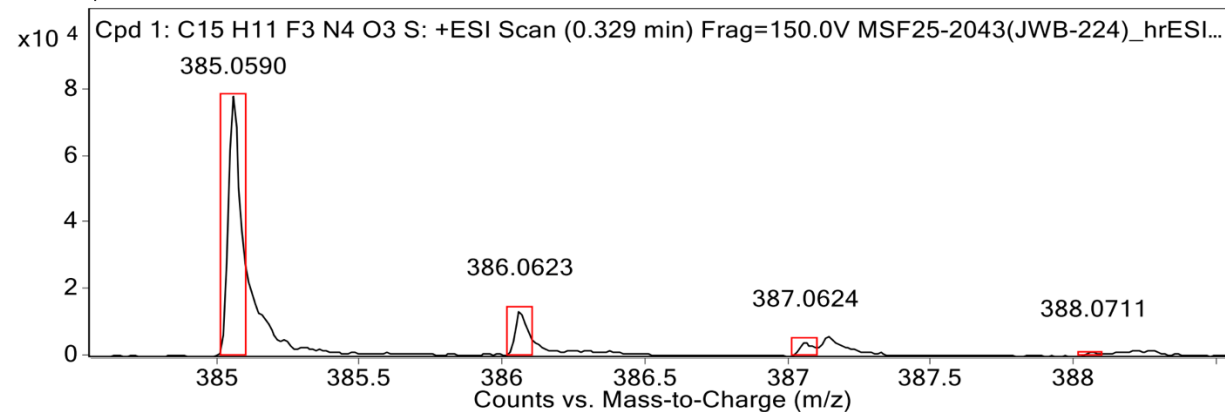

#### MS Spectrum Peak List

| Obs. m/z | Calc. m/z | Charge | Abundance | Formula                                                                        | Ion Species        | Tgt Mass Error (ppm) |
|----------|-----------|--------|-----------|--------------------------------------------------------------------------------|--------------------|----------------------|
| 385.0590 | 385.0577  | 1      | 78326     | C <sub>15</sub> H <sub>11</sub> F <sub>3</sub> N <sub>4</sub> O <sub>3</sub> S | (M+H) <sup>+</sup> | -3.57                |
| 386.0623 | 386.0604  | 1      | 13764     | C <sub>15</sub> H <sub>11</sub> F <sub>3</sub> N <sub>4</sub> O <sub>3</sub> S | (M+H) <sup>+</sup> | -4.87                |
| 387.0624 | 387.0566  | 1      | 4353      | C <sub>15</sub> H <sub>11</sub> F <sub>3</sub> N <sub>4</sub> O <sub>3</sub> S | (M+H) <sup>+</sup> | -15.07               |
| 388.0711 | 388.0581  | 1      | 1326      | C <sub>15</sub> H <sub>11</sub> F <sub>3</sub> N <sub>4</sub> O <sub>3</sub> S | (M+H) <sup>+</sup> | -33.48               |
| 389.1370 | 389.0593  | 1      | 1675      | C <sub>15</sub> H <sub>11</sub> F <sub>3</sub> N <sub>4</sub> O <sub>3</sub> S | (M+H) <sup>+</sup> | -199.73              |

--- End Of Report ---

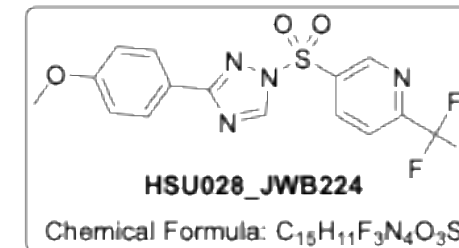

## Target Compound Screening Report

### Results Acquired by The University of Texas at Austin Mass Spectrometry Facility

**Data File** MSF25-2063(JWB221)\_hrESIpos1.d **Sample Name** 2063(JWB221) **Comment** 2063(JWB221)  
**Position** P1-D2 **Instrument Name** 6530 **User Name**  
**Acq Method** FIA\_pos.m **Acquired Time** 12/4/2025 10:45:54 AM **DA Method** MSF.m

MS Zoomed Spectrum

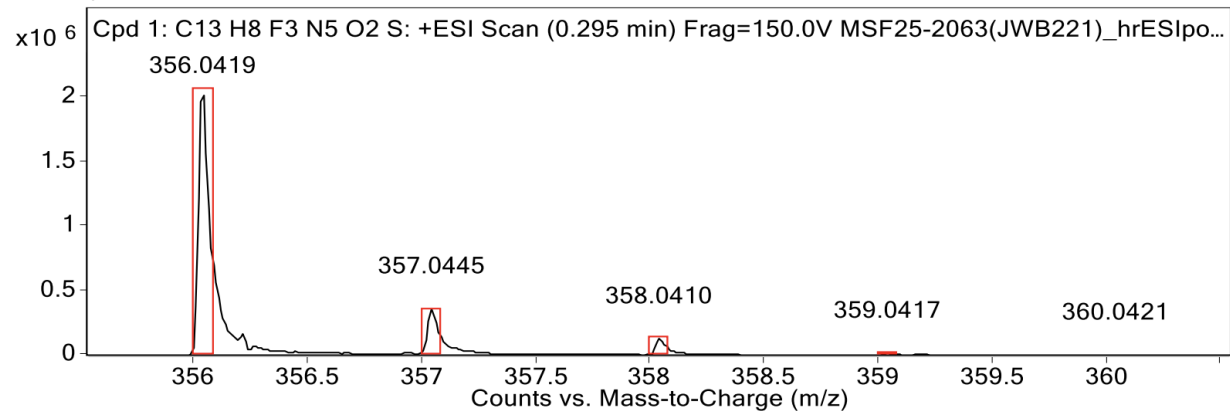

MS Spectrum Peak List

| Obs. m/z | Calc. m/z | Charge | Abundance | Formula                                                                       | Ion Species        | Tgt Mass Error (ppm) |
|----------|-----------|--------|-----------|-------------------------------------------------------------------------------|--------------------|----------------------|
| 356.0419 | 356.0424  | 1      | 2054974   | C <sub>13</sub> H <sub>8</sub> F <sub>3</sub> N <sub>5</sub> O <sub>2</sub> S | (M+H) <sup>+</sup> | 1.31                 |
| 357.0445 | 357.0449  | 1      | 360844    | C <sub>13</sub> H <sub>8</sub> F <sub>3</sub> N <sub>5</sub> O <sub>2</sub> S | (M+H) <sup>+</sup> | 0.89                 |
| 358.0410 | 358.0407  | 1      | 127975    | C <sub>13</sub> H <sub>8</sub> F <sub>3</sub> N <sub>5</sub> O <sub>2</sub> S | (M+H) <sup>+</sup> | -0.94                |
| 359.0417 | 359.0422  | 1      | 16257     | C <sub>13</sub> H <sub>8</sub> F <sub>3</sub> N <sub>5</sub> O <sub>2</sub> S | (M+H) <sup>+</sup> | 1.35                 |
| 360.0421 | 360.0433  | 1      | 2193      | C <sub>13</sub> H <sub>8</sub> F <sub>3</sub> N <sub>5</sub> O <sub>2</sub> S | (M+H) <sup>+</sup> | 3.32                 |

--- End Of Report ---

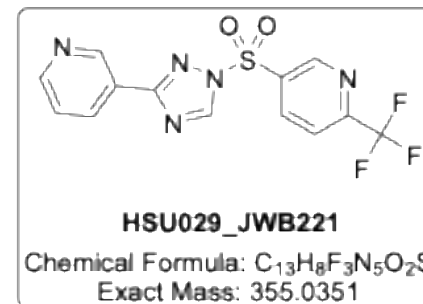

# Target Compound Screening Report

## Results Acquired by The University of Texas at Austin Mass Spectrometry Facility

|                   |                                   |                        |             |                  |                                   |
|-------------------|-----------------------------------|------------------------|-------------|------------------|-----------------------------------|
| <b>Data File</b>  | MSF25-2040(JWB-123)_hrESIposLC1.d | <b>Sample Name</b>     | Unavailable | <b>Comment</b>   | Sample information is unavailable |
| <b>Position</b>   | Unavailable                       | <b>Instrument Name</b> | Unavailable | <b>User Name</b> | Unavailable                       |
| <b>Acq Method</b> |                                   | <b>Acquired Time</b>   | Unavailable | <b>DA Method</b> | MSF.m                             |

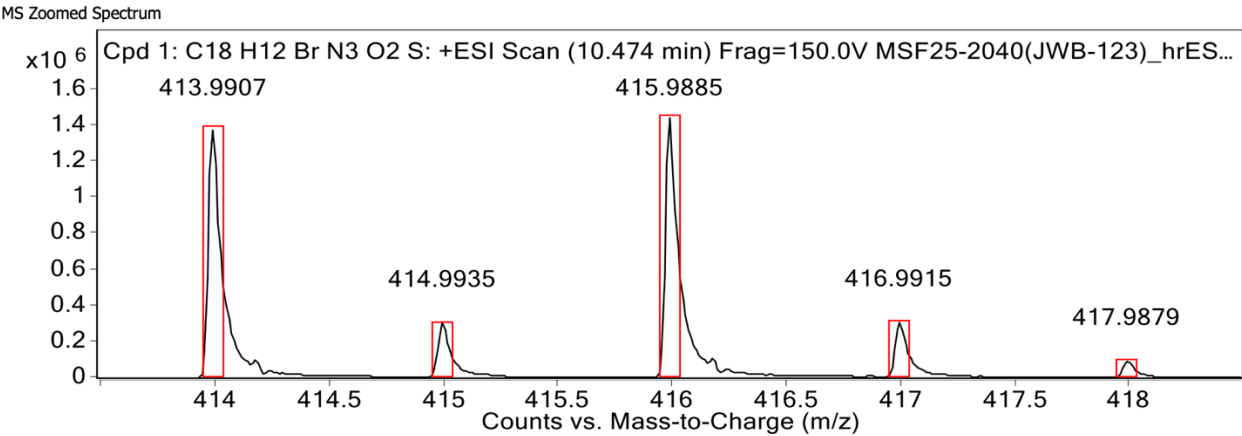

| MS Spectrum Peak List |           |        |           |                                                                   |                    |                      |
|-----------------------|-----------|--------|-----------|-------------------------------------------------------------------|--------------------|----------------------|
| Obs. m/z              | Calc. m/z | Charge | Abundance | Formula                                                           | Ion Species        | Tgt Mass Error (ppm) |
| 413.9907              | 413.9906  | 1      | 1377179   | C <sub>18</sub> H <sub>12</sub> BrN <sub>3</sub> O <sub>2</sub> S | (M+H) <sup>+</sup> | -0.06                |
| 414.9935              | 414.9935  | 1      | 311013    | C <sub>18</sub> H <sub>12</sub> BrN <sub>3</sub> O <sub>2</sub> S | (M+H) <sup>+</sup> | 0.14                 |
| 415.9885              | 415.9887  | 1      | 1446529   | C <sub>18</sub> H <sub>12</sub> BrN <sub>3</sub> O <sub>2</sub> S | (M+H) <sup>+</sup> | 0.37                 |
| 416.9915              | 416.9915  | 1      | 314084    | C <sub>18</sub> H <sub>12</sub> BrN <sub>3</sub> O <sub>2</sub> S | (M+H) <sup>+</sup> | 0.05                 |
| 417.9879              | 417.9881  | 1      | 99280     | C <sub>18</sub> H <sub>12</sub> BrN <sub>3</sub> O <sub>2</sub> S | (M+H) <sup>+</sup> | 0.58                 |

--- End Of Report ---

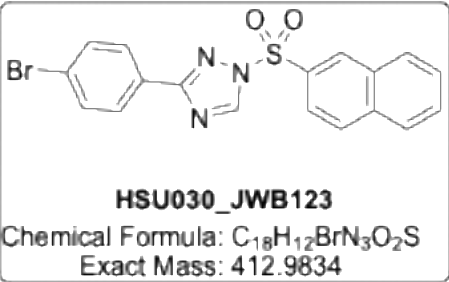

# Target Screening Report

## Results Acquired by The University of Texas at Austin Mass Spectrometry Facility

|                           |                                |                        |                                   |                  |              |
|---------------------------|--------------------------------|------------------------|-----------------------------------|------------------|--------------|
| <b>Data File</b>          | MSF25-2099(JWB209)_hrESIpos1.d | <b>Sample Name</b>     | 2099(JWB209)                      | <b>Comment</b>   | 2099(JWB209) |
| <b>Position</b>           | P1-F6                          | <b>Instrument Name</b> | Instrument 1                      |                  |              |
| <b>Acquisition Method</b> | FIA_Pos.m                      | <b>Acquired Time</b>   | 12/15/2025 5:21:40 PM (UTC-06:00) | <b>DA Method</b> | MSF.m        |

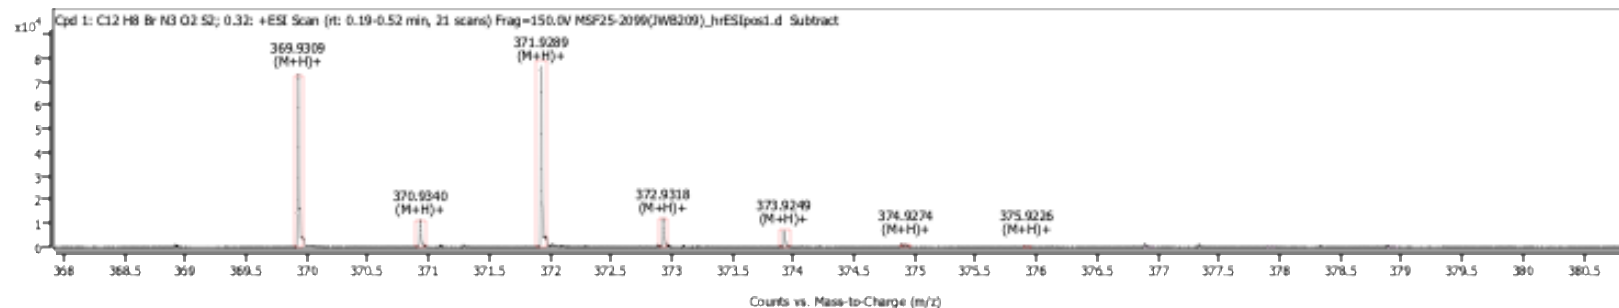

### Spectrum Peaks

| Obs. m/z | Calc. m/z | Charge | Abund    | Formula       | Ion Species | Tgt Mass Error (PPM) |
|----------|-----------|--------|----------|---------------|-------------|----------------------|
| 369.9309 | 369.9314  | 1      | 74221    | C12H8BrN3O2S2 | (M+H)+      | -1.48                |
| 370.9340 | 370.9340  | 1      | 11803    | C12H8BrN3O2S2 | (M+H)+      | 0.05                 |
| 371.9289 | 371.9293  | 1      | 77349    | C12H8BrN3O2S2 | (M+H)+      | -1.03                |
| 372.9318 | 372.9318  | 1      | 12417    | C12H8BrN3O2S2 | (M+H)+      | -0.07                |
| 373.9249 | 373.9255  | 1      | 6098     | C12H8BrN3O2S2 | (M+H)+      | -4.35                |
| 374.9274 | 374.9286  | 1      | 1213     | C12H8BrN3O2S2 | (M+H)+      | -3.03                |
| 375.9226 | 375.9249  | 1      | 216      | C12H8BrN3O2S2 | (M+H)+      | -6.13                |
| 130.1589 |           |        | 10468549 |               |             |                      |

MassHunter Qual 10.0  
(End of Report)

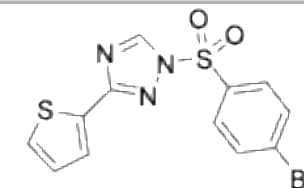

**HSU032\_JWB209**

Chemical Formula: C<sub>12</sub>H<sub>8</sub>BrN<sub>3</sub>O<sub>2</sub>S<sub>2</sub>  
Exact Mass: 368.9241

# Target Screening Report

## Results Acquired by The University of Texas at Austin Mass Spectrometry Facility

Data File: MSP25-2143/AHL-014-2)\_hrESIPosLC1.d  
 Sample Name:   
 Position:   
 Instrument Name:   
 Acquired Time: 12/19/2025 2:56:13 PM (UTC-06:00)  
 DA Method: MSP.m  
 Acquisition Method:   
 Comment:   
 Cpd 1: C18 H19 N3 O3 S; 8.29: +ESI Scan (rt: 8.27-8.34 min, 7 scans) Frag=150.0V MSP25-2143/AHL-014-2)\_hrESIPosLC1.d Subtract

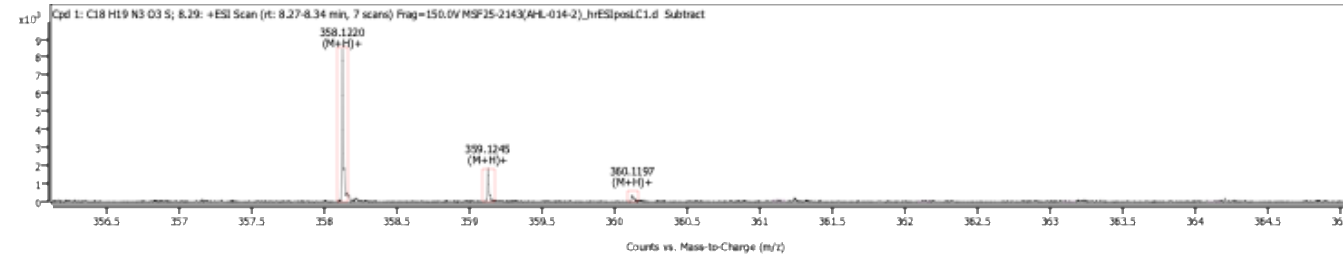

### Spectrum Peaks

| Obs. m/z | Calc. m/z | Charge | Abund | Formula    | Ion Species | Tgt Mass Error (PPM) |
|----------|-----------|--------|-------|------------|-------------|----------------------|
| 358.1220 | 358.1220  | 1      | 8499  | C18H19NO3S | (M+H)+      | 0.01                 |
| 359.1245 | 359.1245  | 1      | 1859  | C18H19NO3S | (M+H)+      | -1.18                |
| 360.1197 | 360.1216  | 1      | 377   | C18H19NO3S | (M+H)+      | -5.17                |

MassHunter Qual 10.0  
 (End of Report)

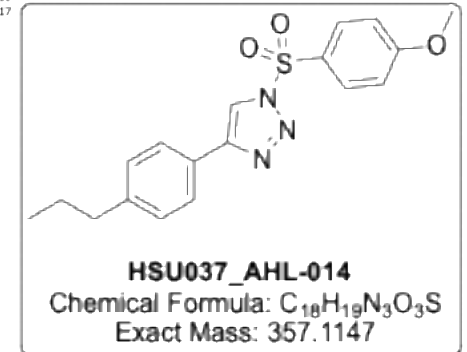



# Target Compound Screening Report

## Results Acquired by The University of Texas at Austin Mass Spectrometry Facility

**Data File** MSF25-2063(AHL017)\_hrESIpos1.d      **Sample Name** 2063(AHL017)      **Comment** 2063(AHL017)  
**Position** P1-E3      **Instrument Name** 6530      **User Name**  
**Acq Method** FIA\_pos.m      **Acquired Time** 12/4/2025 11:06:02 AM      **DA Method** MSF.m

MS Zoomed Spectrum

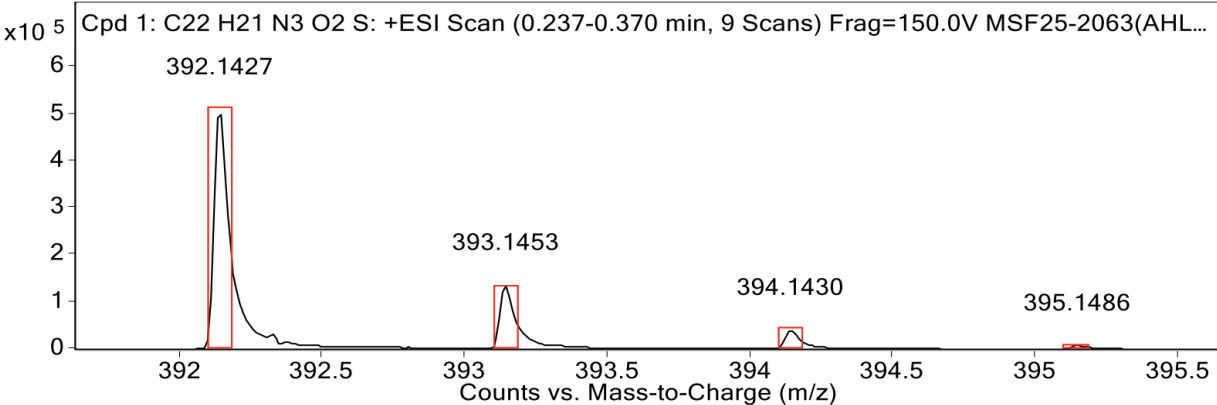

MS Spectrum Peak List

| Obs. m/z | Calc. m/z | Charge | Abundance | Formula                                                         | Ion Species        | Tgt Mass Error (ppm) |
|----------|-----------|--------|-----------|-----------------------------------------------------------------|--------------------|----------------------|
| 386.1182 |           |        | 1176102   |                                                                 |                    |                      |
| 392.1427 | 392.1427  | 1      | 510087    | C <sub>22</sub> H <sub>21</sub> N <sub>3</sub> O <sub>2</sub> S | (M+H) <sup>+</sup> | 0.15                 |
| 393.1453 | 393.1457  | 1      | 136366    | C <sub>22</sub> H <sub>21</sub> N <sub>3</sub> O <sub>2</sub> S | (M+H) <sup>+</sup> | 1.18                 |
| 394.1430 | 394.1430  | 1      | 40763     | C <sub>22</sub> H <sub>21</sub> N <sub>3</sub> O <sub>2</sub> S | (M+H) <sup>+</sup> | 0                    |
| 395.1486 | 395.1440  | 1      | 7586      | C <sub>22</sub> H <sub>21</sub> N <sub>3</sub> O <sub>2</sub> S | (M+H) <sup>+</sup> | -11.75               |

--- End Of Report ---

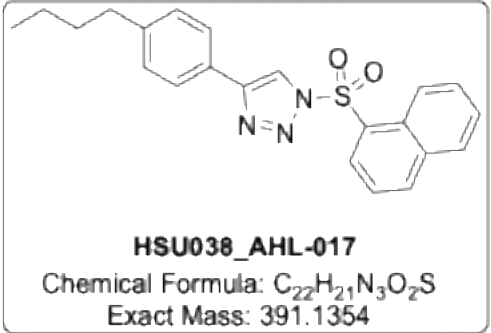

Target Screening Report

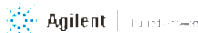

Results Acquired by The University of Texas at Austin Mass Spectrometry Facility

|                    |                                |                 |                                   |           |              |
|--------------------|--------------------------------|-----------------|-----------------------------------|-----------|--------------|
| Data File          | MSF25-2099(AHL021)_hrES(pos1.d | Sample Name     | 2099(AHL021)                      | Comment   | 2099(AHL021) |
| Position           | P1-E7                          | Instrument Name | Instrument 1                      |           |              |
| Acquisition Method | FIA_Pos.m                      | Acquired Time   | 12/15/2025 5:08:39 PM (UTC-06:00) | DA Method | MSF.m        |

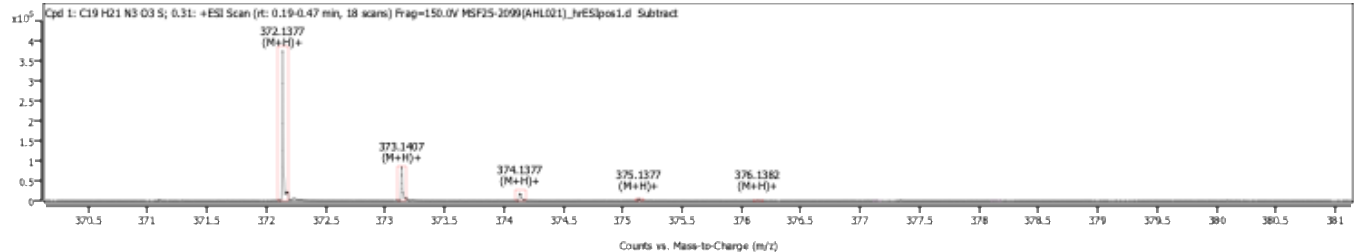

Spectrum Peaks

| Obs. m/z | Calc. m/z | Charge | Abund   | Formula     | Ion Species | Tgt Mass Error (PPM) |
|----------|-----------|--------|---------|-------------|-------------|----------------------|
| 372.1377 | 372.1376  | 1      | 385128  | C19H21N3O3S | (M+H)+      | 0.05                 |
| 373.1407 | 373.1406  | 1      | 86521   | C19H21N3O3S | (M+H)+      | 0.36                 |
| 374.1377 | 374.1374  | 1      | 19401   | C19H21N3O3S | (M+H)+      | 0.61                 |
| 375.1377 | 375.1387  | 1      | 4561    | C19H21N3O3S | (M+H)+      | -2.62                |
| 376.1382 | 376.1401  | 1      | 749     | C19H21N3O3S | (M+H)+      | -5.04                |
| 130.1990 |           |        | 9895309 |             |             |                      |

MassHunter Qual 10.0  
(End of Report)

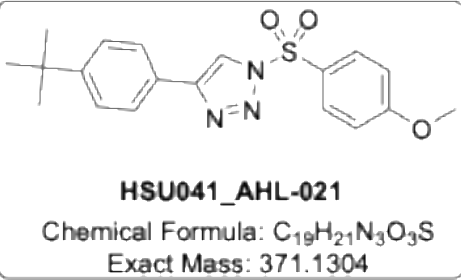

# Target Screening Report

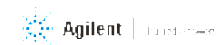

## Results Acquired by The University of Texas at Austin Mass Spectrometry Facility

|                           |                                 |                        |                                   |                  |              |
|---------------------------|---------------------------------|------------------------|-----------------------------------|------------------|--------------|
| <b>Data File</b>          | MSF25-2099(DML189)_hrESI.post.d | <b>Sample Name</b>     | 2099(DML189)                      | <b>Comment</b>   | 2099(DML189) |
| <b>Position</b>           | P1-F4                           | <b>Instrument Name</b> | Instrument 1                      |                  |              |
| <b>Acquisition Method</b> | FIA_Pos.m                       | <b>Acquired Time</b>   | 12/15/2023 5:18:26 PM (UTC-06:00) | <b>DA Method</b> | MSF.m        |

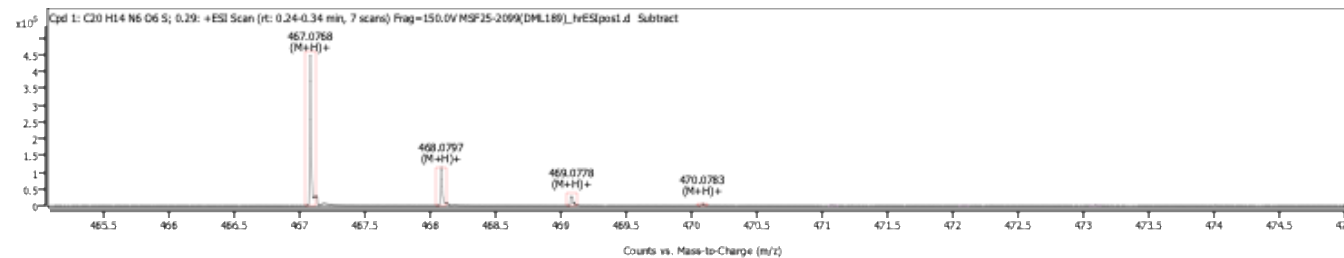

### Spectrum Peaks

| Obs. m/z | Calc. m/z | Charge | Abund    | Formula     | Ion Species | Tgt Mass Error (PPM) |
|----------|-----------|--------|----------|-------------|-------------|----------------------|
| 467.0768 | 467.0768  | 1      | 456293   | C20H14N6O6S | (M+H)+      | -0.09                |
| 468.0797 | 468.0795  | 1      | 116254   | C20H14N6O6S | (M+H)+      | 0.40                 |
| 469.0778 | 469.0771  | 1      | 26809    | C20H14N6O6S | (M+H)+      | 1.42                 |
| 470.0783 | 470.0784  | 1      | 5894     | C20H14N6O6S | (M+H)+      | -0.09                |
| 130.1589 |           |        | 11053639 |             |             |                      |

MassHunter Qual 10.0  
(End of Report)

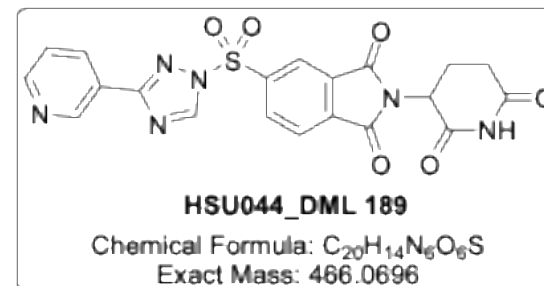

## Target Compound Screening Report

### Results Acquired by The University of Texas at Austin Mass Spectrometry Facility

**Data File** MSF25-2087(DML367)\_hrESIposLC1.d **Sample Name** 2087(DML367) **Comment** 2087(DML367)  
**Position** P1-D5 **Instrument Name** 6530 **User Name**  
**Acq Method** LC\_C18\_pos\_jl.m **Acquired Time** 12/4/2025 9:15:35 PM **DA Method** MSF.m

MS Zoomed Spectrum

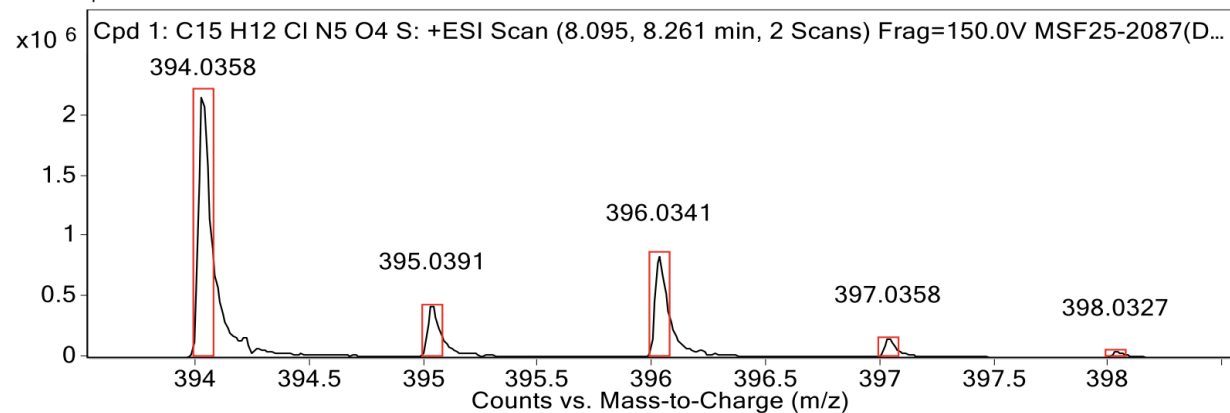

MS Spectrum Peak List

| Obs. m/z | Calc. m/z | Charge | Abundance | Formula                                                           | Ion Species        | Tgt Mass Error (ppm) |
|----------|-----------|--------|-----------|-------------------------------------------------------------------|--------------------|----------------------|
| 394.0358 | 394.0371  | 1      | 2211590   | C <sub>15</sub> H <sub>12</sub> ClN <sub>5</sub> O <sub>4</sub> S | (M+H) <sup>+</sup> | 3.32                 |
| 395.0391 | 395.0397  | 1      | 437564    | C <sub>15</sub> H <sub>12</sub> ClN <sub>5</sub> O <sub>4</sub> S | (M+H) <sup>+</sup> | 1.76                 |
| 396.0341 | 396.0345  | 1      | 840389    | C <sub>15</sub> H <sub>12</sub> ClN <sub>5</sub> O <sub>4</sub> S | (M+H) <sup>+</sup> | 1.19                 |
| 397.0358 | 397.0369  | 1      | 162511    | C <sub>15</sub> H <sub>12</sub> ClN <sub>5</sub> O <sub>4</sub> S | (M+H) <sup>+</sup> | 2.95                 |
| 398.0327 | 398.0336  | 1      | 53848     | C <sub>15</sub> H <sub>12</sub> ClN <sub>5</sub> O <sub>4</sub> S | (M+H) <sup>+</sup> | 2.23                 |

--- End Of Report ---

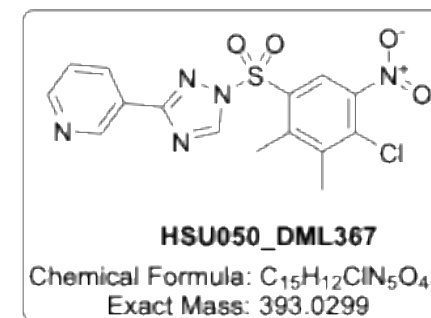

## Target Compound Screening Report

### Results Acquired by The University of Texas at Austin Mass Spectrometry Facility

**Data File** MSF25-2036(AHL-001)\_hrESIpos1.d **Sample Name** 2036(AHL-001) **Comment** 2036(AHL-001)  
**Position** P1-A3 **Instrument Name** 6530 **User Name**  
**Acq Method** FIA\_pos.m **Acquired Time** 11/24/2025 1:53:43 PM **DA Method** MSF.m

#### MS Zoomed Spectrum

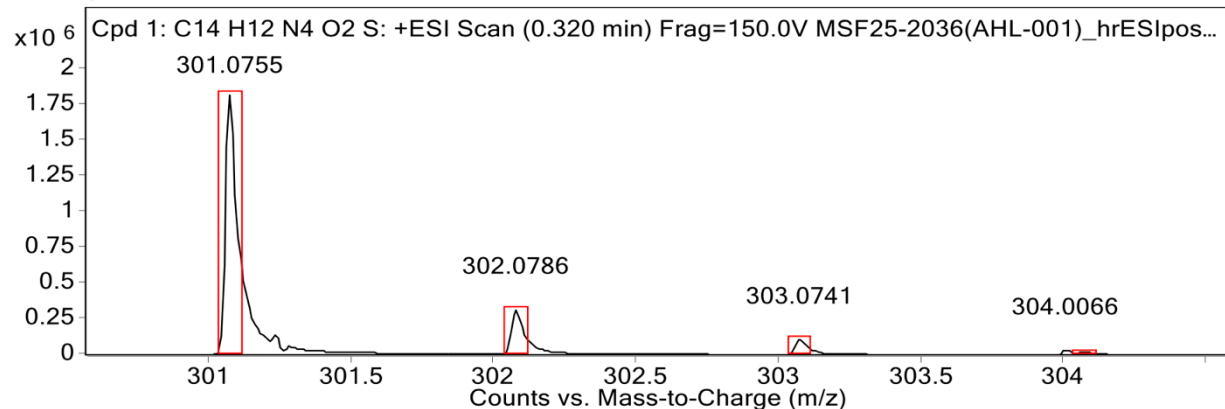

#### MS Spectrum Peak List

| Obs. m/z | Calc. m/z | Charge | Abundance | Formula                                                         | Ion Species        | Tgt Mass Error (ppm) |
|----------|-----------|--------|-----------|-----------------------------------------------------------------|--------------------|----------------------|
| 301.0755 | 301.0754  | 1      | 1815759   | C <sub>14</sub> H <sub>12</sub> N <sub>4</sub> O <sub>2</sub> S | (M+H) <sup>+</sup> | -0.28                |
| 302.0786 | 302.0781  | 1      | 320167    | C <sub>14</sub> H <sub>12</sub> N <sub>4</sub> O <sub>2</sub> S | (M+H) <sup>+</sup> | -1.76                |
| 303.0741 | 303.0739  | 1      | 110800    | C <sub>14</sub> H <sub>12</sub> N <sub>4</sub> O <sub>2</sub> S | (M+H) <sup>+</sup> | -0.62                |
| 304.0066 | 304.0755  | 1      | 35131     | C <sub>14</sub> H <sub>12</sub> N <sub>4</sub> O <sub>2</sub> S | (M+H) <sup>+</sup> | 226.51               |
| 305.0077 | 305.0766  | 1      | 6387      | C <sub>14</sub> H <sub>12</sub> N <sub>4</sub> O <sub>2</sub> S | (M+H) <sup>+</sup> | 225.89               |

--- End Of Report ---

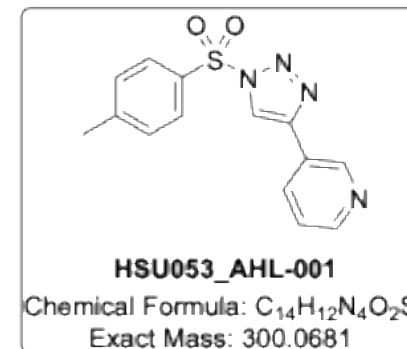

Target Compound Screening Report

Results Acquired by The University of Texas at Austin Mass Spectrometry Facility

Data File MSF25-2063(AHL010)\_hrESIpos1.d      Sample Name 2063(AHL010)      Comment 2063(AHL010)  
Position P1-D9      Instrument Name 6530      User Name  
Acq Method FIA\_pos.m      Acquired Time 12/4/2025 11:00:01 AM      DA Method MSF.m

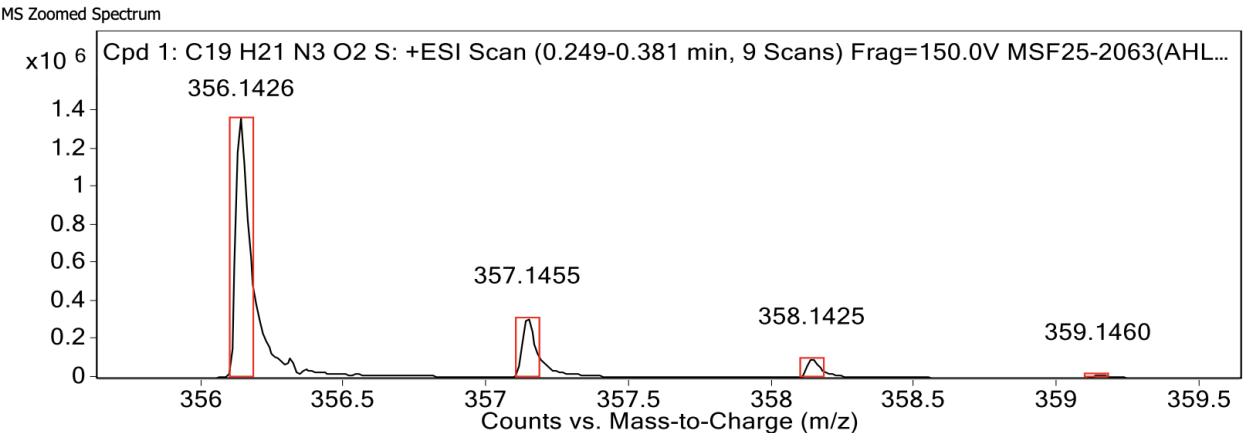

MS Spectrum Peak List

| Obs. m/z | Calc. m/z | Charge | Abundance | Formula     | Ion Species | Tgt Mass Error (ppm) |
|----------|-----------|--------|-----------|-------------|-------------|----------------------|
| 350.1180 |           |        | 2843358   |             |             |                      |
| 356.1426 | 356.1427  | 1      | 1362227   | C19H21N3O2S | (M+H)+      | 0.32                 |
| 357.1455 | 357.1457  | 1      | 311766    | C19H21N3O2S | (M+H)+      | 0.45                 |
| 358.1425 | 358.1424  | 1      | 97903     | C19H21N3O2S | (M+H)+      | -0.37                |
| 359.1460 | 359.1436  | 1      | 15085     | C19H21N3O2S | (M+H)+      | -6.87                |

--- End Of Report ---

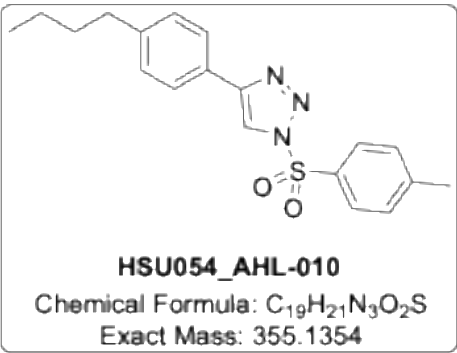

## Target Compound Screening Report

### Results Acquired by The University of Texas at Austin Mass Spectrometry Facility

|                   |                                |                        |                       |                  |              |
|-------------------|--------------------------------|------------------------|-----------------------|------------------|--------------|
| <b>Data File</b>  | MSF25-2063(AHL020)_hrESIpos1.d | <b>Sample Name</b>     | 2063(AHL020)          | <b>Comment</b>   | 2063(AHL020) |
| <b>Position</b>   | P1-E4                          | <b>Instrument Name</b> | 6530                  | <b>User Name</b> |              |
| <b>Acq Method</b> | FIA_pos.m                      | <b>Acquired Time</b>   | 12/4/2025 11:08:03 AM | <b>DA Method</b> | MSF.m        |

MS Zoomed Spectrum

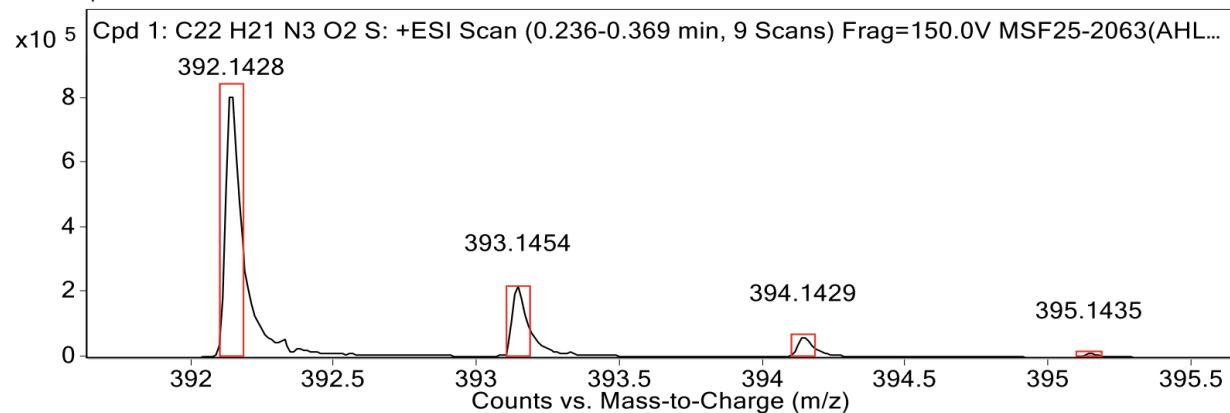

MS Spectrum Peak List

| Obs. m/z | Calc. m/z | Charge | Abundance | Formula                                                         | Ion Species        | Tgt Mass Error (ppm) |
|----------|-----------|--------|-----------|-----------------------------------------------------------------|--------------------|----------------------|
| 386.1178 |           |        | 2835460   |                                                                 |                    |                      |
| 392.1428 | 392.1427  | 1      | 839543    | C <sub>22</sub> H <sub>21</sub> N <sub>3</sub> O <sub>2</sub> S | (M+H) <sup>+</sup> | -0.2                 |
| 393.1454 | 393.1457  | 1      | 220208    | C <sub>22</sub> H <sub>21</sub> N <sub>3</sub> O <sub>2</sub> S | (M+H) <sup>+</sup> | 0.83                 |
| 394.1429 | 394.1430  | 1      | 65407     | C <sub>22</sub> H <sub>21</sub> N <sub>3</sub> O <sub>2</sub> S | (M+H) <sup>+</sup> | 0.34                 |
| 395.1435 | 395.1440  | 1      | 11697     | C <sub>22</sub> H <sub>21</sub> N <sub>3</sub> O <sub>2</sub> S | (M+H) <sup>+</sup> | 1.21                 |

--- End Of Report ---

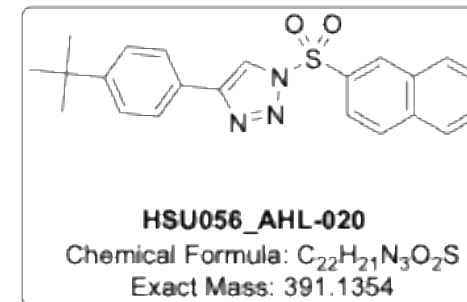

# Target Screening Report

## Results Acquired by The University of Texas at Austin Mass Spectrometry Facility

|                    |                                |                 |                                   |           |              |
|--------------------|--------------------------------|-----------------|-----------------------------------|-----------|--------------|
| Data File          | MSF25-2099(AHL032)_hrESIpos1.d | Sample Name     | 2099(AHL032)                      | Comment   | 2099(AHL032) |
| Position           | P1-E8                          | Instrument Name | Instrument 1                      | DA Method | MSF.m        |
| Acquisition Method | FIA_Pos.m                      | Acquired Time   | 12/15/2025 5:10:18 PM (UTC-06:00) |           |              |

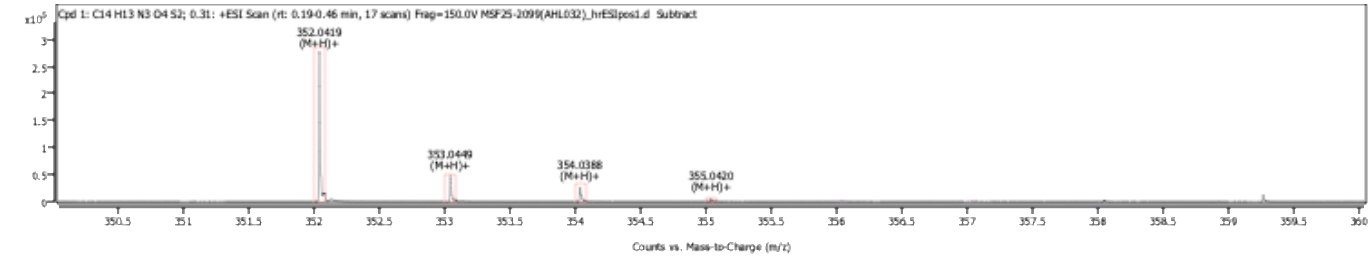

### Spectrum Peaks

| Obs. m/z | Calc. m/z | Charge | Abund   | Formula      | Ion Species | Tgt Mass Error (PPM) |
|----------|-----------|--------|---------|--------------|-------------|----------------------|
| 352.0419 | 352.0420  | 1      | 284062  | C14H13N3O4S2 | (M+H)+      | -0.33                |
| 353.0449 | 353.0447  | 1      | 49068   | C14H13N3O4S2 | (M+H)+      | 0.55                 |
| 354.0388 | 354.0397  | 1      | 27153   | C14H13N3O4S2 | (M+H)+      | -2.72                |
| 355.0420 | 355.0418  | 1      | 3876    | C14H13N3O4S2 | (M+H)+      | 0.77                 |
| 130.1590 |           |        | 9651942 |              |             |                      |

MassHunter Qual 10.0  
(End of Report)

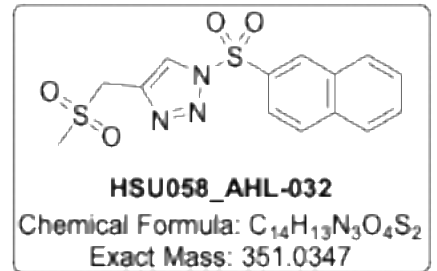



# Target Screening Report



## Results Acquired by The University of Texas at Austin Mass Spectrometry Facility

|                    |                                    |                 |                                   |           |              |
|--------------------|------------------------------------|-----------------|-----------------------------------|-----------|--------------|
| Data File          | MSF25-2129(AHL033)_hrESI(pos).CL.d | Sample Name     | 2129(AHL033)                      | Comment   | 2129(AHL033) |
| Position           | P1-C3                              | Instrument Name | Instrument 1                      |           |              |
| Acquisition Method | LC C18 OBO4 .JLm                   | Acquired Time   | 12/18/2025 8:37:03 PM (UTC-06:00) | DA Method | MSF.m        |

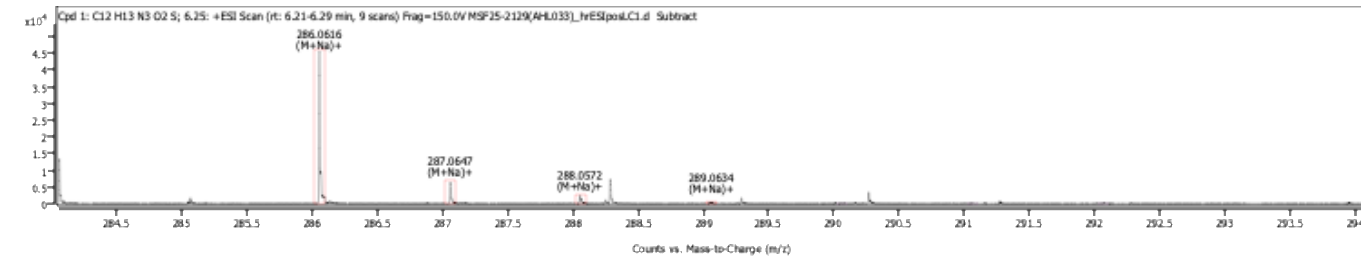

### Spectrum Peaks

| Obs. m/z | Calc. m/z | Charge | Abund   | Formula    | Ion Species | Tgt Mass Error (PPM) |
|----------|-----------|--------|---------|------------|-------------|----------------------|
| 286.0616 | 286.0621  | 1      | 45887   | C12H13NO2S | (M+Na)+     | -1.75                |
| 287.0647 | 287.0648  | 1      | 6431    | C12H13NO2S | (M+Na)+     | -0.36                |
| 288.0572 | 288.0602  | 1      | 2512    | C12H13NO2S | (M+Na)+     | -10.44               |
| 289.0634 | 289.0620  | 1      | 351     | C12H13NO2S | (M+Na)+     | 4.81                 |
| 260.1182 |           |        | 5713466 |            |             |                      |

MassHunter Qual 10.0  
(End of Report)

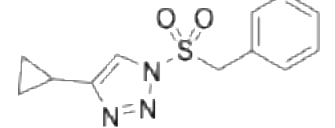

**HSU059\_AHL-033**  
Chemical Formula: C<sub>12</sub>H<sub>13</sub>N<sub>3</sub>O<sub>2</sub>S  
Exact Mass: 263.0728

## Target Compound Screening Report

### Results Acquired by The University of Texas at Austin Mass Spectrometry Facility

**Data File** MSF25-2087(AHL035)\_hrESIposLC1.d **Sample Name** 2087(AHL035) **Comment** 2087(AHL035)  
**Position** P1-C6 **Instrument Name** 6530 **User Name**  
**Acq Method** LC\_C18\_pos\_jl.m **Acquired Time** 12/4/2025 6:11:50 PM **DA Method** MSF.m

MS Zoomed Spectrum

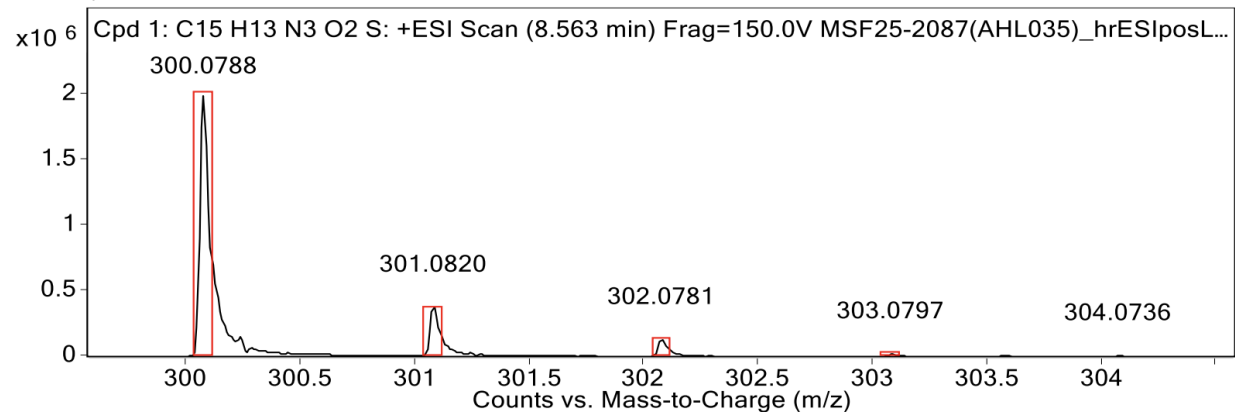

MS Spectrum Peak List

| Obs. m/z | Calc. m/z | Charge | Abundance | Formula                                                         | Ion Species        | Tgt Mass Error (ppm) |
|----------|-----------|--------|-----------|-----------------------------------------------------------------|--------------------|----------------------|
| 300.0788 | 300.0801  | 1      | 1995820   | C <sub>15</sub> H <sub>13</sub> N <sub>3</sub> O <sub>2</sub> S | (M+H) <sup>+</sup> | 4.34                 |
| 301.0820 | 301.0830  | 1      | 378066    | C <sub>15</sub> H <sub>13</sub> N <sub>3</sub> O <sub>2</sub> S | (M+H) <sup>+</sup> | 3.25                 |
| 302.0781 | 302.0789  | 1      | 130701    | C <sub>15</sub> H <sub>13</sub> N <sub>3</sub> O <sub>2</sub> S | (M+H) <sup>+</sup> | 2.68                 |
| 303.0797 | 303.0804  | 1      | 21773     | C <sub>15</sub> H <sub>13</sub> N <sub>3</sub> O <sub>2</sub> S | (M+H) <sup>+</sup> | 2.34                 |
| 304.0736 | 304.0817  | 1      | 7650      | C <sub>15</sub> H <sub>13</sub> N <sub>3</sub> O <sub>2</sub> S | (M+H) <sup>+</sup> | 26.61                |
| 305.0780 | 305.0833  | 1      | 1398      | C <sub>15</sub> H <sub>13</sub> N <sub>3</sub> O <sub>2</sub> S | (M+H) <sup>+</sup> | 17.4                 |

--- End Of Report ---

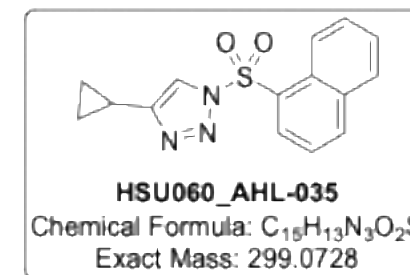

## Target Compound Screening Report

### Results Acquired by The University of Texas at Austin Mass Spectrometry Facility

**Data File** MSF25-2087(AHL038)\_hrESIposLC1.d  
**Position** P1-C7  
**Acq Method** LC\_C18\_pos\_jl.m

**Sample Name** 2087(AHL038)  
**Instrument Name** 6530  
**Acquired Time** 12/4/2025 6:34:49 PM

**Comment** 2087(AHL038)  
**User Name**  
**DA Method** MSF.m

MS Zoomed Spectrum

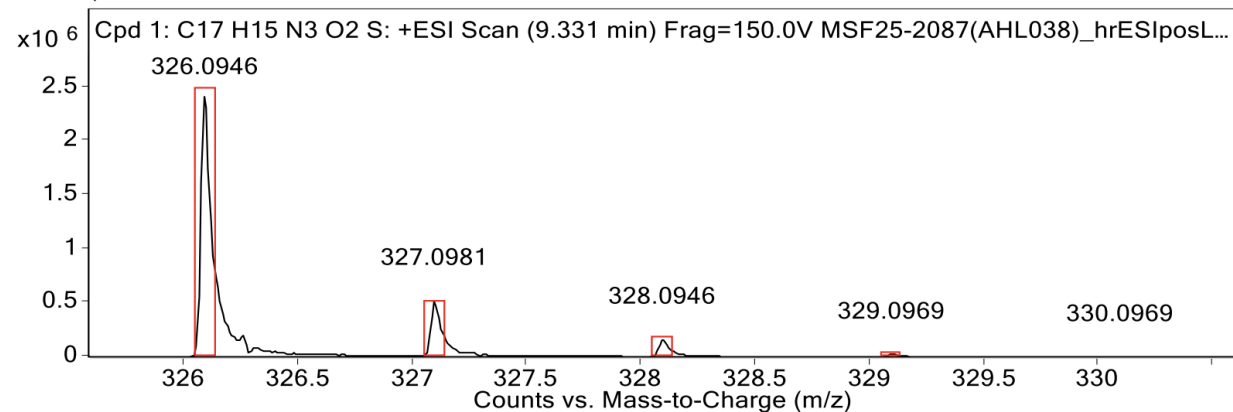

#### MS Spectrum Peak List

| Obs. m/z | Calc. m/z | Charge | Abundance | Formula                                                         | Ion Species        | Tgt Mass Error (ppm) |
|----------|-----------|--------|-----------|-----------------------------------------------------------------|--------------------|----------------------|
| 326.0946 | 326.0958  | 1      | 2479350   | C <sub>17</sub> H <sub>15</sub> N <sub>3</sub> O <sub>2</sub> S | (M+H) <sup>+</sup> | 3.72                 |
| 327.0981 | 327.0987  | 1      | 524298    | C <sub>17</sub> H <sub>15</sub> N <sub>3</sub> O <sub>2</sub> S | (M+H) <sup>+</sup> | 1.68                 |
| 328.0946 | 328.0950  | 1      | 164961    | C <sub>17</sub> H <sub>15</sub> N <sub>3</sub> O <sub>2</sub> S | (M+H) <sup>+</sup> | 1.03                 |
| 329.0969 | 329.0964  | 1      | 25706     | C <sub>17</sub> H <sub>15</sub> N <sub>3</sub> O <sub>2</sub> S | (M+H) <sup>+</sup> | -1.78                |
| 330.0969 | 330.0977  | 1      | 2744      | C <sub>17</sub> H <sub>15</sub> N <sub>3</sub> O <sub>2</sub> S | (M+H) <sup>+</sup> | 2.54                 |

--- End Of Report ---

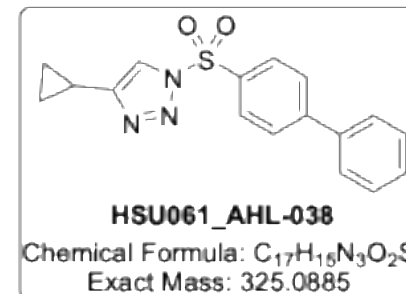

## Target Compound Screening Report

### Results Acquired by The University of Texas at Austin Mass Spectrometry Facility

|                   |                                    |                        |                      |                  |                |
|-------------------|------------------------------------|------------------------|----------------------|------------------|----------------|
| <b>Data File</b>  | MSF25-2087(AHL7004A)_hrESIposLC1.d | <b>Sample Name</b>     | 2087(AHL7004A)       | <b>Comment</b>   | 2087(AHL7004A) |
| <b>Position</b>   | P1-D2                              | <b>Instrument Name</b> | 6530                 | <b>User Name</b> |                |
| <b>Acq Method</b> | LC_C18_pos_jl.m                    | <b>Acquired Time</b>   | 12/4/2025 8:06:41 PM | <b>DA Method</b> | MSF.m          |

#### MS Zoomed Spectrum

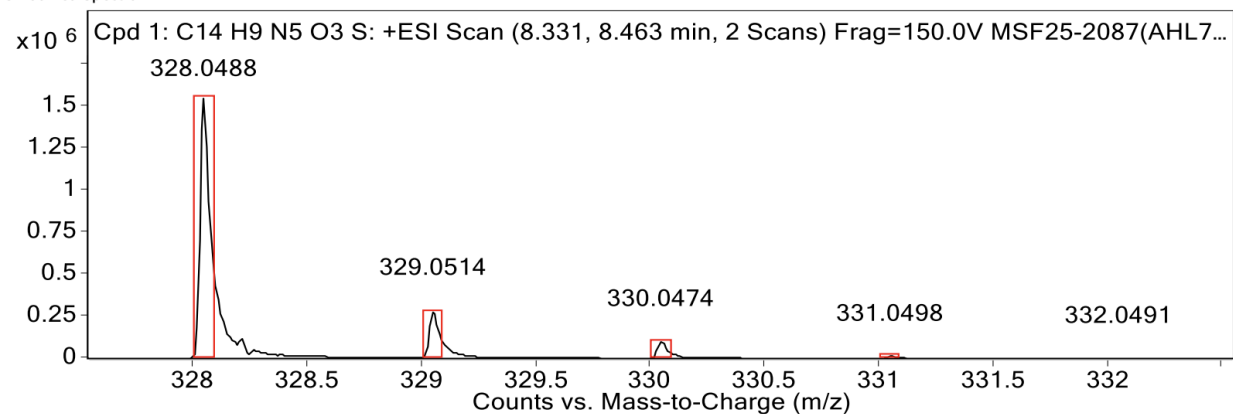

#### MS Spectrum Peak List

| Obs. m/z | Calc. m/z | Charge | Abundance | Formula                                                        | Ion Species        | Tgt Mass Error (ppm) |
|----------|-----------|--------|-----------|----------------------------------------------------------------|--------------------|----------------------|
| 328.0488 | 328.0499  | 1      | 1550059   | C <sub>14</sub> H <sub>9</sub> N <sub>5</sub> O <sub>3</sub> S | (M+H) <sup>+</sup> | 3.46                 |
| 329.0514 | 329.0524  | 1      | 287820    | C <sub>14</sub> H <sub>9</sub> N <sub>5</sub> O <sub>3</sub> S | (M+H) <sup>+</sup> | 3.25                 |
| 330.0474 | 330.0486  | 1      | 102204    | C <sub>14</sub> H <sub>9</sub> N <sub>5</sub> O <sub>3</sub> S | (M+H) <sup>+</sup> | 3.74                 |
| 331.0498 | 331.0501  | 1      | 14026     | C <sub>14</sub> H <sub>9</sub> N <sub>5</sub> O <sub>3</sub> S | (M+H) <sup>+</sup> | 1.05                 |
| 332.0491 | 332.0512  | 1      | 1889      | C <sub>14</sub> H <sub>9</sub> N <sub>5</sub> O <sub>3</sub> S | (M+H) <sup>+</sup> | 6.3                  |

--- End Of Report ---

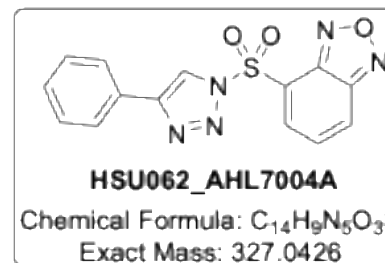

## Target Compound Screening Report

### Results Acquired by The University of Texas at Austin Mass Spectrometry Facility

**Data File** MSF25-2087(AHL7004B)\_hrESIposLC1.d **Sample Name** 2087(AHL7004B) **Comment** 2087(AHL7004B)  
**Position** P1-D3 **Instrument Name** 6530 **User Name**  
**Acq Method** LC\_C18\_pos\_jl.m **Acquired Time** 12/4/2025 8:29:36 PM **DA Method** MSF.m

#### MS Zoomed Spectrum

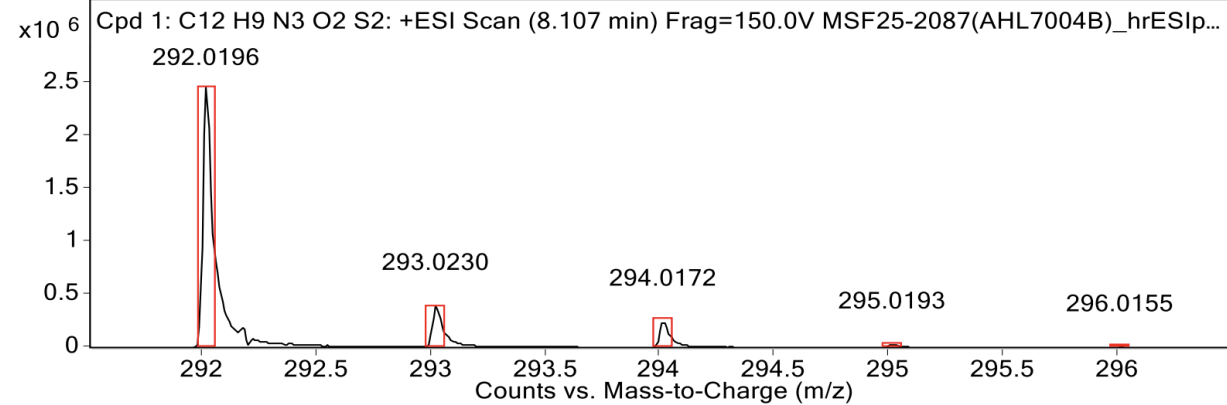

#### MS Spectrum Peak List

| Obs. m/z | Calc. m/z | Charge | Abundance | Formula                                                                     | Ion Species        | Tgt Mass Error (ppm) |
|----------|-----------|--------|-----------|-----------------------------------------------------------------------------|--------------------|----------------------|
| 292.0196 | 292.0209  | 1      | 2463582   | C <sub>12</sub> H <sub>9</sub> N <sub>3</sub> O <sub>2</sub> S <sub>2</sub> | (M+H) <sup>+</sup> | 4.5                  |
| 293.0230 | 293.0234  | 1      | 400507    | C <sub>12</sub> H <sub>9</sub> N <sub>3</sub> O <sub>2</sub> S <sub>2</sub> | (M+H) <sup>+</sup> | 1.52                 |
| 294.0172 | 294.0181  | 1      | 251014    | C <sub>12</sub> H <sub>9</sub> N <sub>3</sub> O <sub>2</sub> S <sub>2</sub> | (M+H) <sup>+</sup> | 2.88                 |
| 295.0193 | 295.0201  | 1      | 34946     | C <sub>12</sub> H <sub>9</sub> N <sub>3</sub> O <sub>2</sub> S <sub>2</sub> | (M+H) <sup>+</sup> | 2.81                 |
| 296.0155 | 296.0164  | 1      | 8654      | C <sub>12</sub> H <sub>9</sub> N <sub>3</sub> O <sub>2</sub> S <sub>2</sub> | (M+H) <sup>+</sup> | 2.96                 |

--- End Of Report ---

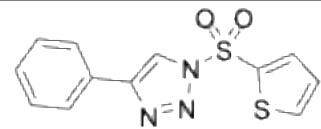

**HSU063\_AHL7004B**

Chemical Formula: C<sub>12</sub>H<sub>10</sub>N<sub>3</sub>O<sub>2</sub>S<sub>2</sub>

Exact Mass: 291.0136

Target Compound Screening Report

Results Acquired by The University of Texas at Austin Mass Spectrometry Facility

Data File MSF25-2087(AHL7004C)\_hrESIposLC1.d Sample Name 2087(AHL7004C) Comment 2087(AHL7004C)  
Position P1-D4 Instrument Name 6530 User Name  
Acq Method LC\_C18\_pos\_jl.m Acquired Time 12/4/2025 8:52:35 PM DA Method MSF.m

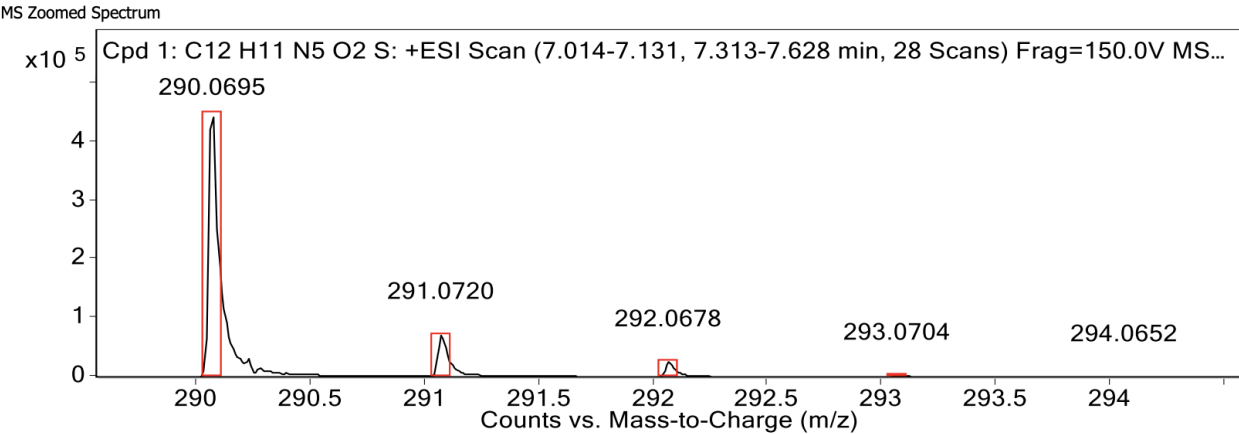

MS Spectrum Peak List

| Obs. m/z | Calc. m/z | Charge | Abundance | Formula     | Ion Species | Tgt Mass Error (ppm) |
|----------|-----------|--------|-----------|-------------|-------------|----------------------|
| 290.0695 | 290.0706  | 1      | 449080    | C12H11N5O2S | (M+H)+      | 3.72                 |
| 291.0720 | 291.0731  | 1      | 72894     | C12H11N5O2S | (M+H)+      | 3.55                 |
| 292.0678 | 292.0687  | 1      | 26001     | C12H11N5O2S | (M+H)+      | 3.26                 |
| 293.0704 | 293.0703  | 1      | 3242      | C12H11N5O2S | (M+H)+      | -0.45                |
| 294.0652 | 294.0713  | 1      | 487       | C12H11N5O2S | (M+H)+      | 20.67                |

--- End Of Report ---

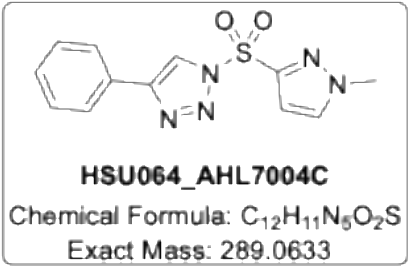

## Target Compound Screening Report

### Results Acquired by The University of Texas at Austin Mass Spectrometry Facility

**Data File** MSF25-2063(JWB101)\_hrESIpos1.d **Sample Name** 2063(JWB101) **Comment** 2063(JWB101)  
**Position** P1-C1 **Instrument Name** 6530 **User Name**  
**Acq Method** FIA\_pos.m **Acquired Time** 12/4/2025 10:25:37 AM **DA Method** MSF.m

MS Zoomed Spectrum

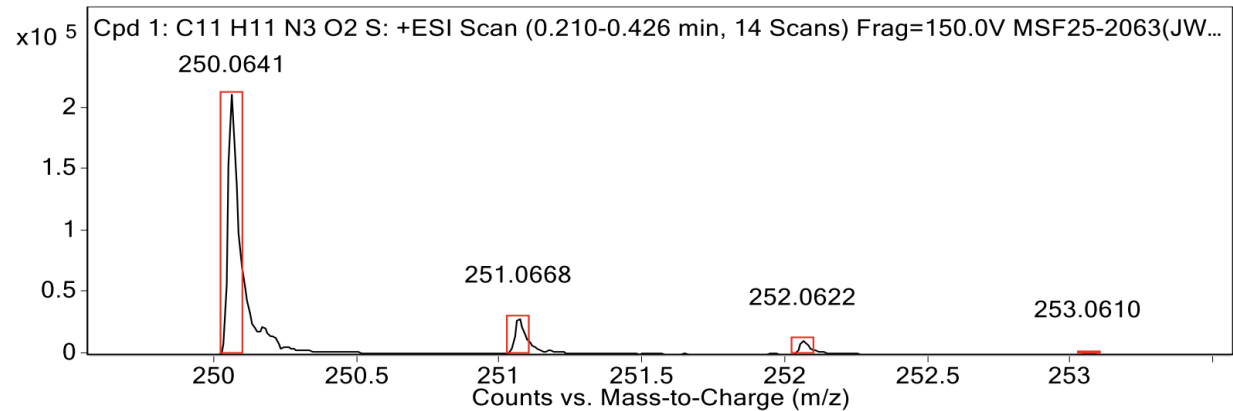

#### MS Spectrum Peak List

| Obs. m/z | Calc. m/z | Charge | Abundance | Formula                                                         | Ion Species        | Tgt Mass Error (ppm) |
|----------|-----------|--------|-----------|-----------------------------------------------------------------|--------------------|----------------------|
| 250.0641 | 250.0645  | 1      | 212953    | C <sub>11</sub> H <sub>11</sub> N <sub>3</sub> O <sub>2</sub> S | (M+H) <sup>+</sup> | 1.55                 |
| 251.0668 | 251.0671  | 1      | 29722     | C <sub>11</sub> H <sub>11</sub> N <sub>3</sub> O <sub>2</sub> S | (M+H) <sup>+</sup> | 1.31                 |
| 252.0622 | 252.0624  | 1      | 11501     | C <sub>11</sub> H <sub>11</sub> N <sub>3</sub> O <sub>2</sub> S | (M+H) <sup>+</sup> | 0.54                 |
| 253.0610 | 253.0643  | 1      | 1470      | C <sub>11</sub> H <sub>11</sub> N <sub>3</sub> O <sub>2</sub> S | (M+H) <sup>+</sup> | 13.2                 |
| 867.0737 |           |        | 212500    |                                                                 |                    |                      |

--- End Of Report ---

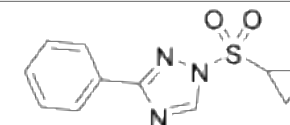

**HSU071\_JWB101**

Chemical Formula: C<sub>11</sub>H<sub>11</sub>N<sub>3</sub>O<sub>2</sub>S  
Exact Mass: 249.0572

## Target Compound Screening Report

### Results Acquired by The University of Texas at Austin Mass Spectrometry Facility

**Data File** MSF25-2063(JWB106)\_hrESIpos1.d **Sample Name** 2063(JWB106) **Comment** 2063(JWB106)  
**Position** P1-C2 **Instrument Name** 6530 **User Name**  
**Acq Method** FIA\_pos.m **Acquired Time** 12/4/2025 10:27:38 AM **DA Method** MSF.m

MS Zoomed Spectrum

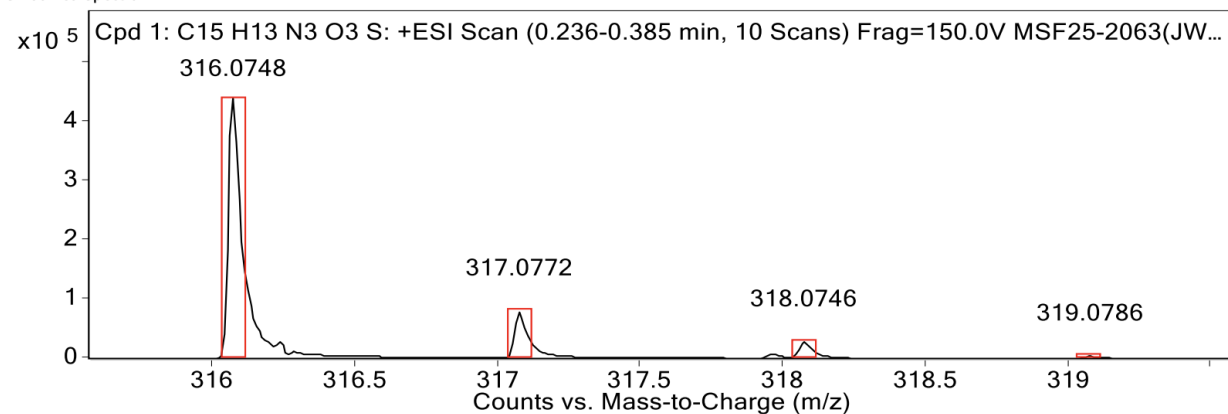

#### MS Spectrum Peak List

| Obs. m/z | Calc. m/z | Charge | Abundance | Formula                                                         | Ion Species        | Tgt Mass Error (ppm) |
|----------|-----------|--------|-----------|-----------------------------------------------------------------|--------------------|----------------------|
| 316.0748 | 316.0750  | 1      | 440410    | C <sub>15</sub> H <sub>13</sub> N <sub>3</sub> O <sub>3</sub> S | (M+H) <sup>+</sup> | 0.81                 |
| 317.0772 | 317.0779  | 1      | 80937     | C <sub>15</sub> H <sub>13</sub> N <sub>3</sub> O <sub>3</sub> S | (M+H) <sup>+</sup> | 2.12                 |
| 318.0746 | 318.0740  | 1      | 28563     | C <sub>15</sub> H <sub>13</sub> N <sub>3</sub> O <sub>3</sub> S | (M+H) <sup>+</sup> | -1.94                |
| 319.0786 | 319.0756  | 1      | 4504      | C <sub>15</sub> H <sub>13</sub> N <sub>3</sub> O <sub>3</sub> S | (M+H) <sup>+</sup> | -9.46                |
| 320.0772 | 320.0768  | 1      | 811       | C <sub>15</sub> H <sub>13</sub> N <sub>3</sub> O <sub>3</sub> S | (M+H) <sup>+</sup> | -1.29                |

--- End Of Report ---

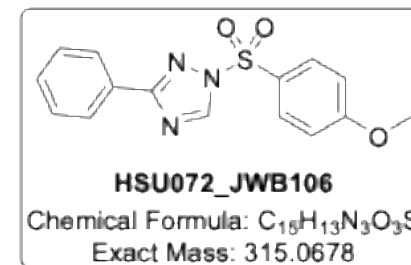



# Target Compound Screening Report

## Results Acquired by The University of Texas at Austin Mass Spectrometry Facility

**Data File** MSF25-2063(JWB117)\_hrESIpos1.d      **Sample Name** 2063(JWB117)      **Comment** 2063(JWB117)  
**Position** P1-C3      **Instrument Name** 6530      **User Name**  
**Acq Method** FIA\_pos.m      **Acquired Time** 12/4/2025 10:29:40 AM      **DA Method** MSF.m

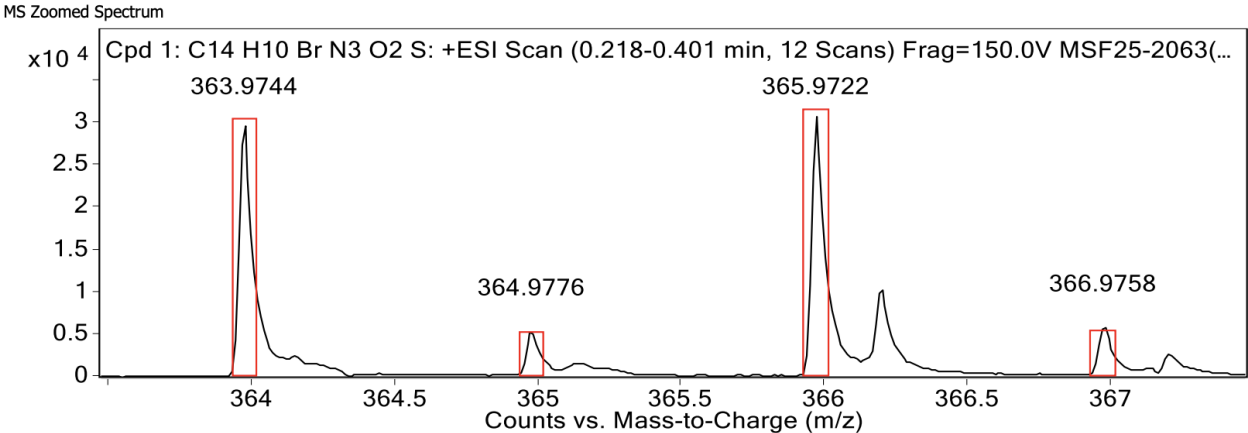

| MS Spectrum Peak List |           |        |           |               |             |                      |
|-----------------------|-----------|--------|-----------|---------------|-------------|----------------------|
| Obs. m/z              | Calc. m/z | Charge | Abundance | Formula       | Ion Species | Tgt Mass Error (ppm) |
| 130.1591              |           |        | 422236    |               |             |                      |
| 363.9744              | 363.9750  | 1      | 29876     | C14H10BrN3O2S | (M+H)+      | 1.66                 |
| 364.9776              | 364.9778  | 1      | 5489      | C14H10BrN3O2S | (M+H)+      | 0.47                 |
| 365.9722              | 365.9730  | 1      | 30849     | C14H10BrN3O2S | (M+H)+      | 2.12                 |
| 366.9758              | 366.9757  | 1      | 5953      | C14H10BrN3O2S | (M+H)+      | -0.37                |

--- End Of Report ---

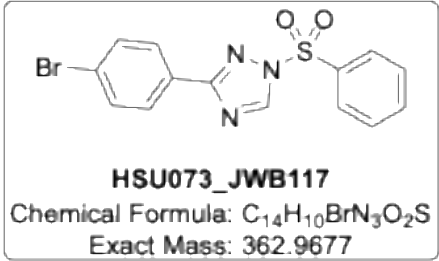

# Target Compound Screening Report

## Results Acquired by The University of Texas at Austin Mass Spectrometry Facility

**Data File** MSF25-2063(JWB134)\_hrESIpos1.d      **Sample Name** 2063(JWB134)      **Comment** 2063(JWB134)  
**Position** P1-C6      **Instrument Name** 6530      **User Name**  
**Acq Method** FIA\_pos.m      **Acquired Time** 12/4/2025 10:35:47 AM      **DA Method** MSF.m

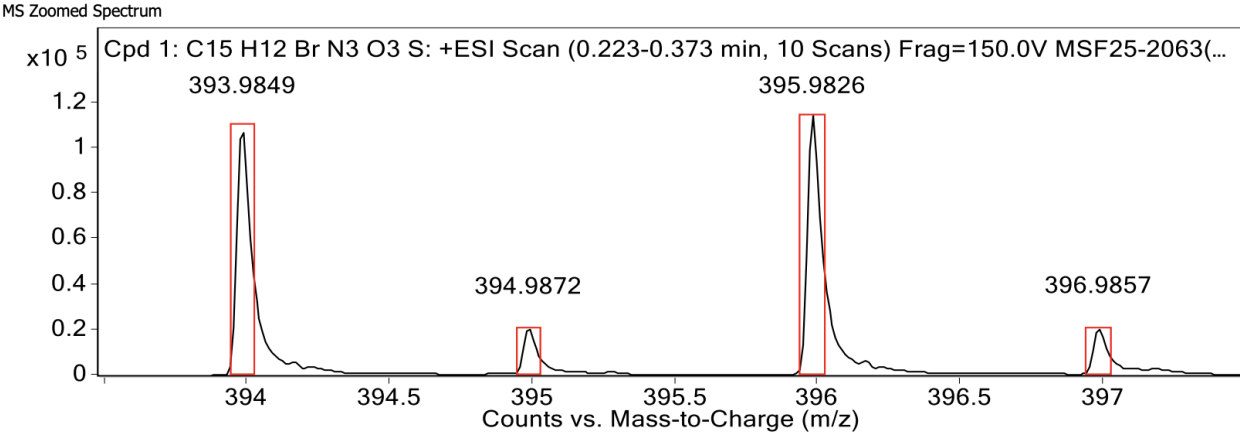

MS Spectrum Peak List

| Obs. m/z | Calc. m/z | Charge | Abundance | Formula       | Ion Species | Tgt Mass Error (ppm) |
|----------|-----------|--------|-----------|---------------|-------------|----------------------|
| 393.9849 | 393.9856  | 1      | 109046    | C15H12BrN3O3S | (M+H)+      | 1.69                 |
| 394.9872 | 394.9884  | 1      | 20545     | C15H12BrN3O3S | (M+H)+      | 2.99                 |
| 395.9826 | 395.9836  | 1      | 114568    | C15H12BrN3O3S | (M+H)+      | 2.43                 |
| 396.9857 | 396.9863  | 1      | 20906     | C15H12BrN3O3S | (M+H)+      | 1.67                 |
| 867.0743 |           |        | 319119    |               |             |                      |

--- End Of Report ---

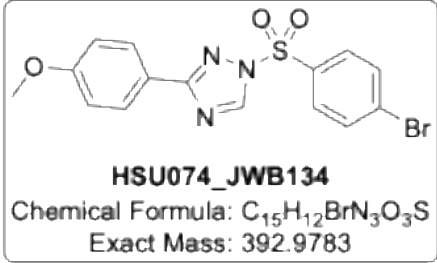

# Target Compound Screening Report

## Results Acquired by The University of Texas at Austin Mass Spectrometry Facility

**Data File** MSF25-2063(JWB124)\_hrESIposLC1.d **Sample Name** 2063(JWB124) **Comment** 2063(JWB124)  
**Position** P1-C5 **Instrument Name** 6530 **User Name**  
**Acq Method** LC\_C18\_pos\_jl.m **Acquired Time** 12/4/2025 12:04:43 PM **DA Method** MSF.m

MS Zoomed Spectrum

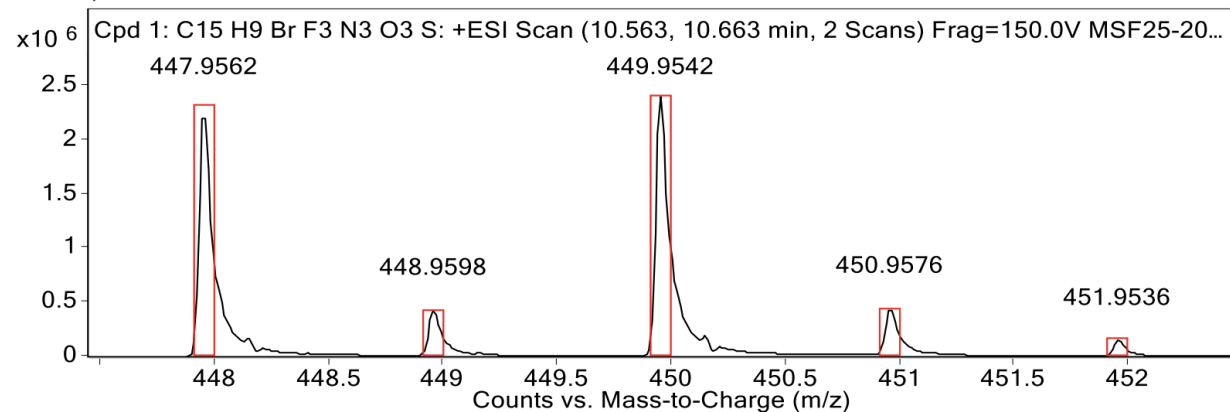

MS Spectrum Peak List

| Obs. m/z | Calc. m/z | Charge | Abundance | Formula                                                                         | Ion Species        | Tgt Mass Error (ppm) |
|----------|-----------|--------|-----------|---------------------------------------------------------------------------------|--------------------|----------------------|
| 447.9562 | 447.9573  | 1      | 2289222   | C <sub>15</sub> H <sub>9</sub> BrF <sub>3</sub> N <sub>3</sub> O <sub>3</sub> S | (M+H) <sup>+</sup> | 2.33                 |
| 448.9598 | 448.9601  | 1      | 430820    | C <sub>15</sub> H <sub>9</sub> BrF <sub>3</sub> N <sub>3</sub> O <sub>3</sub> S | (M+H) <sup>+</sup> | 0.73                 |
| 449.9542 | 449.9553  | 1      | 2400483   | C <sub>15</sub> H <sub>9</sub> BrF <sub>3</sub> N <sub>3</sub> O <sub>3</sub> S | (M+H) <sup>+</sup> | 2.36                 |
| 450.9576 | 450.9581  | 1      | 449016    | C <sub>15</sub> H <sub>9</sub> BrF <sub>3</sub> N <sub>3</sub> O <sub>3</sub> S | (M+H) <sup>+</sup> | 1.07                 |
| 451.9536 | 451.9542  | 1      | 152213    | C <sub>15</sub> H <sub>9</sub> BrF <sub>3</sub> N <sub>3</sub> O <sub>3</sub> S | (M+H) <sup>+</sup> | 1.46                 |

--- End Of Report ---

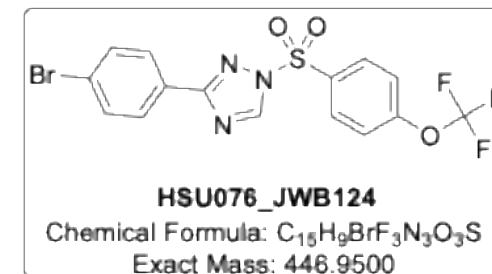

## Target Compound Screening Report

### Results Acquired by The University of Texas at Austin Mass Spectrometry Facility

|                   |                                  |                        |                      |                  |              |
|-------------------|----------------------------------|------------------------|----------------------|------------------|--------------|
| <b>Data File</b>  | MSF25-2063(JWB119)_hrESIposLC1.d | <b>Sample Name</b>     | 2063(JWB119)         | <b>Comment</b>   | 2063(JWB119) |
| <b>Position</b>   | P1-C4                            | <b>Instrument Name</b> | 6530                 | <b>User Name</b> |              |
| <b>Acq Method</b> | LC_C18_pos_jl.m                  | <b>Acquired Time</b>   | 12/4/2025 5:25:51 PM | <b>DA Method</b> | MSF.m        |

MS Zoomed Spectrum

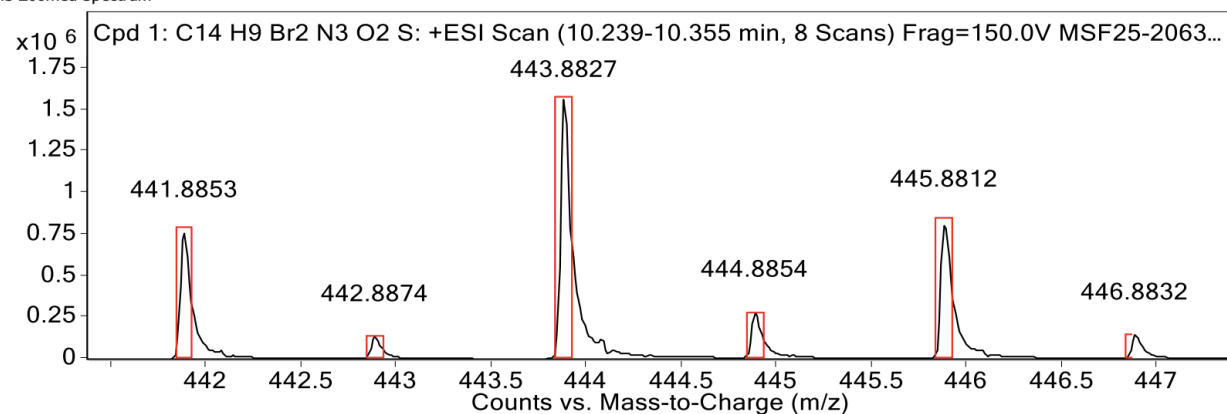

#### MS Spectrum Peak List

| Obs. m/z | Calc. m/z | Charge | Abundance | Formula                                                                        | Ion Species        | Tgt Mass Error (ppm) |
|----------|-----------|--------|-----------|--------------------------------------------------------------------------------|--------------------|----------------------|
| 441.8853 | 441.8855  | 1      | 763367    | C <sub>14</sub> H <sub>9</sub> Br <sub>2</sub> N <sub>3</sub> O <sub>2</sub> S | (M+H) <sup>+</sup> | 0.55                 |
| 442.8874 | 442.8883  | 1      | 136331    | C <sub>14</sub> H <sub>9</sub> Br <sub>2</sub> N <sub>3</sub> O <sub>2</sub> S | (M+H) <sup>+</sup> | 2.04                 |
| 443.8827 | 443.8835  | 1      | 1575727   | C <sub>14</sub> H <sub>9</sub> Br <sub>2</sub> N <sub>3</sub> O <sub>2</sub> S | (M+H) <sup>+</sup> | 1.84                 |
| 444.8854 | 444.8862  | 1      | 284008    | C <sub>14</sub> H <sub>9</sub> Br <sub>2</sub> N <sub>3</sub> O <sub>2</sub> S | (M+H) <sup>+</sup> | 1.83                 |
| 445.8812 | 445.8815  | 1      | 826850    | C <sub>14</sub> H <sub>9</sub> Br <sub>2</sub> N <sub>3</sub> O <sub>2</sub> S | (M+H) <sup>+</sup> | 0.64                 |
| 446.8832 | 446.8841  | 1      | 146646    | C <sub>14</sub> H <sub>9</sub> Br <sub>2</sub> N <sub>3</sub> O <sub>2</sub> S | (M+H) <sup>+</sup> | 2.22                 |

--- End Of Report ---

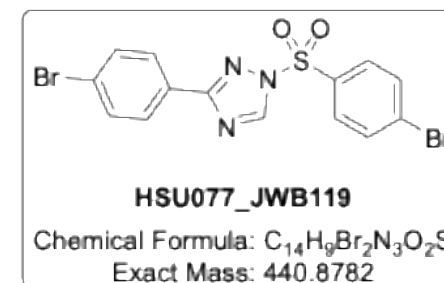

## Target Compound Screening Report

### Results Acquired by The University of Texas at Austin Mass Spectrometry Facility

**Data File** MSF25-2063(JWB139)\_hrESIpos1.d **Sample Name** 2063(JWB139) **Comment** 2063(JWB139)  
**Position** P1-C7 **Instrument Name** 6530 **User Name**  
**Acq Method** FIA\_pos.m **Acquired Time** 12/4/2025 10:37:50 AM **DA Method** MSF.m

MS Zoomed Spectrum

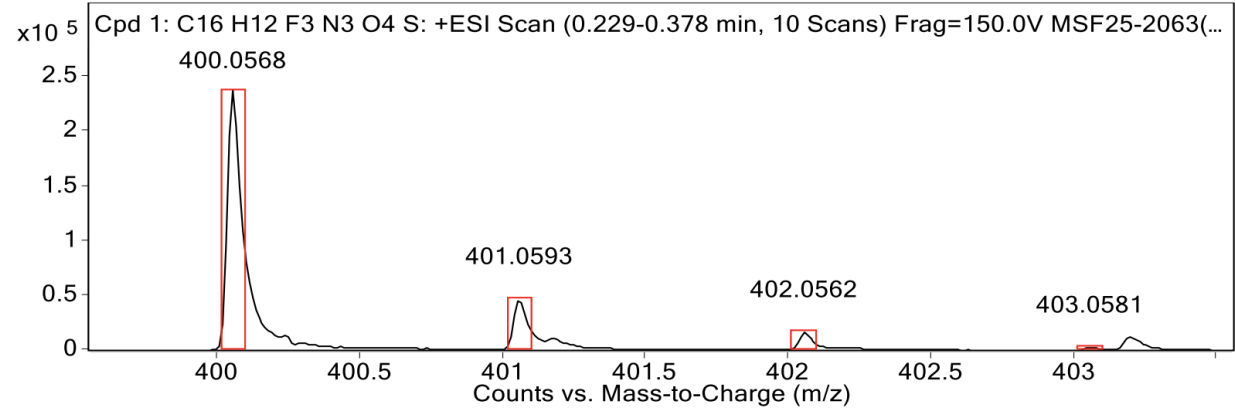

#### MS Spectrum Peak List

| Obs. m/z | Calc. m/z | Charge | Abundance | Formula                                                                        | Ion Species        | Tgt Mass Error (ppm) |
|----------|-----------|--------|-----------|--------------------------------------------------------------------------------|--------------------|----------------------|
| 400.0568 | 400.0573  | 1      | 237845    | C <sub>16</sub> H <sub>12</sub> F <sub>3</sub> N <sub>3</sub> O <sub>4</sub> S | (M+H) <sup>+</sup> | 1.23                 |
| 401.0593 | 401.0602  | 1      | 46701     | C <sub>16</sub> H <sub>12</sub> F <sub>3</sub> N <sub>3</sub> O <sub>4</sub> S | (M+H) <sup>+</sup> | 2.2                  |
| 402.0562 | 402.0566  | 1      | 16432     | C <sub>16</sub> H <sub>12</sub> F <sub>3</sub> N <sub>3</sub> O <sub>4</sub> S | (M+H) <sup>+</sup> | 1.04                 |
| 403.0581 | 403.0583  | 1      | 2353      | C <sub>16</sub> H <sub>12</sub> F <sub>3</sub> N <sub>3</sub> O <sub>4</sub> S | (M+H) <sup>+</sup> | 0.35                 |

--- End Of Report ---

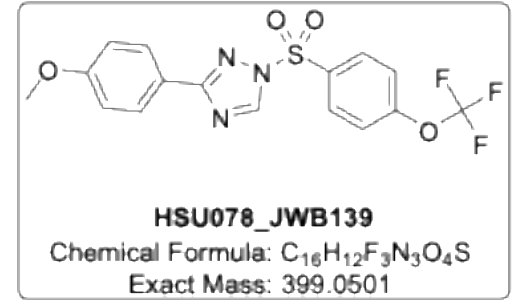

# Target Screening Report

## Results Acquired by The University of Texas at Austin Mass Spectrometry Facility

|                    |                                 |                 |                                   |           |              |
|--------------------|---------------------------------|-----------------|-----------------------------------|-----------|--------------|
| Data File          | MSF25-2143_JWB147_hrESIposLC1.d | Sample Name     | 2143_JWB147                       | Comment   | 2143(JWB147) |
| Position           | P1-C8                           | Instrument Name | Instrument 1                      |           |              |
| Acquisition Method | LC C18 OBDN 3.0um               | Acquired Time   | 12/19/2025 2:34:05 PM (UTC-06:00) | DA Method | MSF.m        |

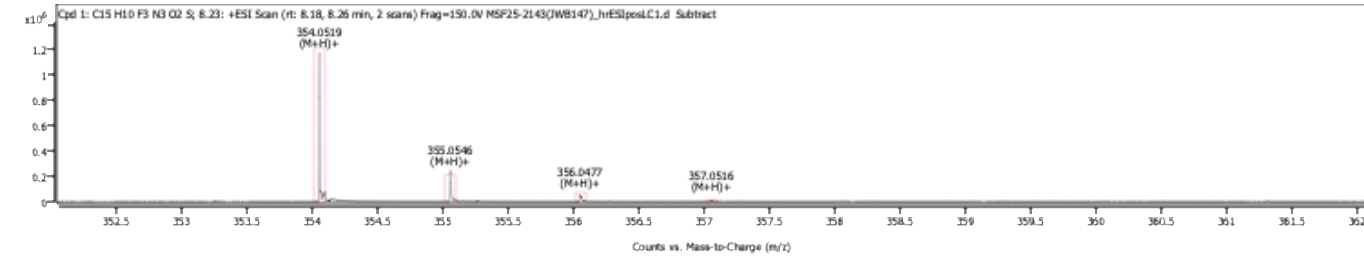

### Spectrum Peaks

| Obs. m/z | Calc. m/z | Charge | Abund   | Formula       | Ion Species | Tgt Mass Error (PPM) |
|----------|-----------|--------|---------|---------------|-------------|----------------------|
| 354.0519 | 354.0519  | 1      | 1207995 | C15H10F3N3O2S | (M+H)+      | 0.04                 |
| 355.0546 | 355.0547  | 1      | 251557  | C15H10F3N3O2S | (M+H)+      | -0.12                |
| 356.0477 | 356.0506  | 1      | 55689   | C15H10F3N3O2S | (M+H)+      | -8.13                |
| 357.0516 | 357.0522  | 1      | 11552   | C15H10F3N3O2S | (M+H)+      | -1.49                |

MassHunter Qual 10.0  
(End of Report)

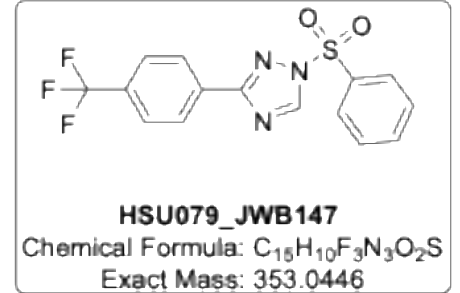

## Target Compound Screening Report

### Results Acquired by The University of Texas at Austin Mass Spectrometry Facility

**Data File** MSF25-2063(JWB149)\_hrESIposLC1.d **Sample Name** 2063(JWB149) **Comment** 2063(JWB149)  
**Position** P1-C8 **Instrument Name** 6530 **User Name**  
**Acq Method** LC\_C18\_pos\_jl.m **Acquired Time** 12/4/2025 12:27:42 PM **DA Method** MSF.m

MS Zoomed Spectrum

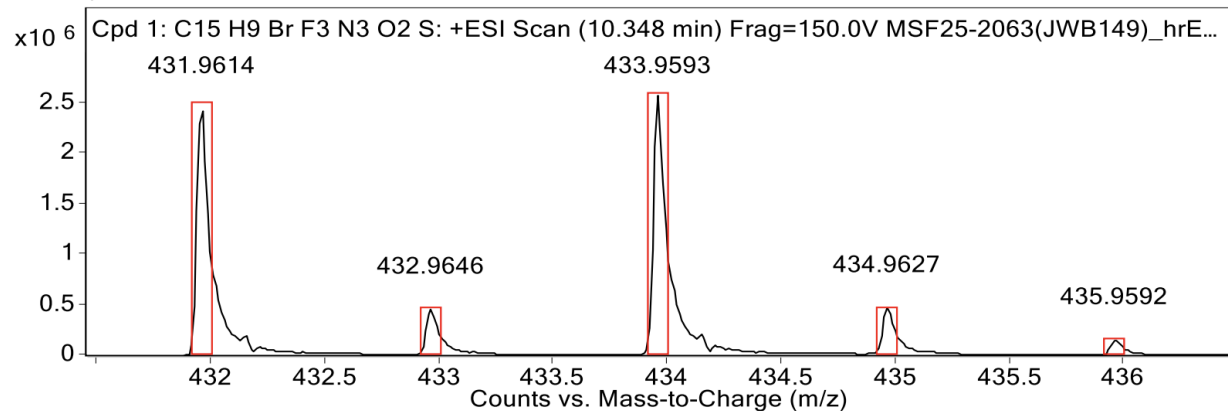

#### MS Spectrum Peak List

| Obs. m/z | Calc. m/z | Charge | Abundance | Formula                                                                         | Ion Species        | Tgt Mass Error (ppm) |
|----------|-----------|--------|-----------|---------------------------------------------------------------------------------|--------------------|----------------------|
| 431.9614 | 431.9624  | 1      | 2447313   | C <sub>15</sub> H <sub>9</sub> BrF <sub>3</sub> N <sub>3</sub> O <sub>2</sub> S | (M+H) <sup>+</sup> | 2.28                 |
| 432.9646 | 432.9652  | 1      | 463283    | C <sub>15</sub> H <sub>9</sub> BrF <sub>3</sub> N <sub>3</sub> O <sub>2</sub> S | (M+H) <sup>+</sup> | 1.42                 |
| 433.9593 | 433.9604  | 1      | 2586893   | C <sub>15</sub> H <sub>9</sub> BrF <sub>3</sub> N <sub>3</sub> O <sub>2</sub> S | (M+H) <sup>+</sup> | 2.53                 |
| 434.9627 | 434.9631  | 1      | 478074    | C <sub>15</sub> H <sub>9</sub> BrF <sub>3</sub> N <sub>3</sub> O <sub>2</sub> S | (M+H) <sup>+</sup> | 0.97                 |
| 435.9592 | 435.9591  | 1      | 160057    | C <sub>15</sub> H <sub>9</sub> BrF <sub>3</sub> N <sub>3</sub> O <sub>2</sub> S | (M+H) <sup>+</sup> | -0.19                |
| 436.9607 | 436.9607  | 1      | 20499     | C <sub>15</sub> H <sub>9</sub> BrF <sub>3</sub> N <sub>3</sub> O <sub>2</sub> S | (M+H) <sup>+</sup> | -0.01                |

--- End Of Report ---

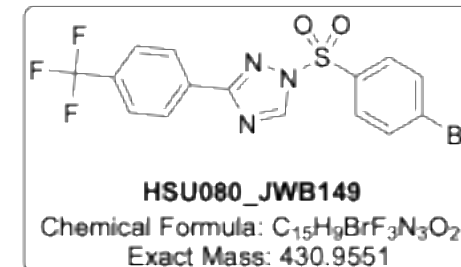

## Target Compound Screening Report

### Results Acquired by The University of Texas at Austin Mass Spectrometry Facility

**Data File** MSF25-2087(AHL1101)\_hrESIposLC1.d **Sample Name** 2087(AHL1101) **Comment** 2087(AHL1101)  
**Position** P1-C8 **Instrument Name** 6530 **User Name**  
**Acq Method** LC\_C18\_pos\_jl.m **Acquired Time** 12/4/2025 6:57:49 PM **DA Method** MSF.m

MS Zoomed Spectrum

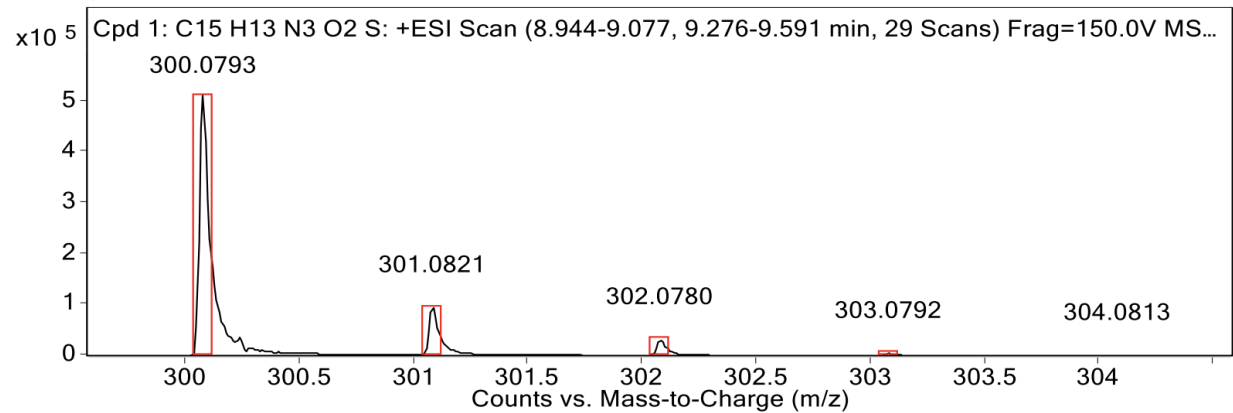

MS Spectrum Peak List

| Obs. m/z | Calc. m/z | Charge | Abundance | Formula                                                         | Ion Species        | Tgt Mass Error (ppm) |
|----------|-----------|--------|-----------|-----------------------------------------------------------------|--------------------|----------------------|
| 300.0793 | 300.0801  | 1      | 512406    | C <sub>15</sub> H <sub>13</sub> N <sub>3</sub> O <sub>2</sub> S | (M+H) <sup>+</sup> | 2.81                 |
| 301.0821 | 301.0830  | 1      | 94533     | C <sub>15</sub> H <sub>13</sub> N <sub>3</sub> O <sub>2</sub> S | (M+H) <sup>+</sup> | 2.8                  |
| 302.0780 | 302.0789  | 1      | 31690     | C <sub>15</sub> H <sub>13</sub> N <sub>3</sub> O <sub>2</sub> S | (M+H) <sup>+</sup> | 2.79                 |
| 303.0792 | 303.0804  | 1      | 4518      | C <sub>15</sub> H <sub>13</sub> N <sub>3</sub> O <sub>2</sub> S | (M+H) <sup>+</sup> | 4.28                 |
| 304.0813 | 304.0817  | 1      | 560       | C <sub>15</sub> H <sub>13</sub> N <sub>3</sub> O <sub>2</sub> S | (M+H) <sup>+</sup> | 1.48                 |

--- End Of Report ---

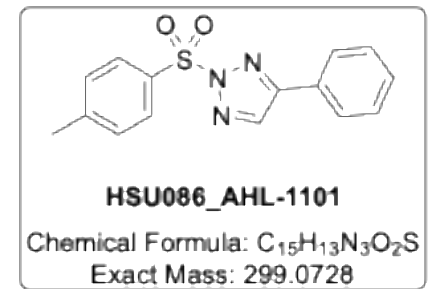



## Target Compound Screening Report

### Results Acquired by The University of Texas at Austin Mass Spectrometry Facility

**Data File** MSF25-2087(AHL1118)\_hrESIposLC1.d **Sample Name** 2087(AHL1118) **Comment** 2087(AHL1118)  
**Position** P1-C9 **Instrument Name** 6530 **User Name**  
**Acq Method** LC\_C18\_pos\_jl.m **Acquired Time** 12/4/2025 7:20:48 PM **DA Method** MSF.m

MS Zoomed Spectrum

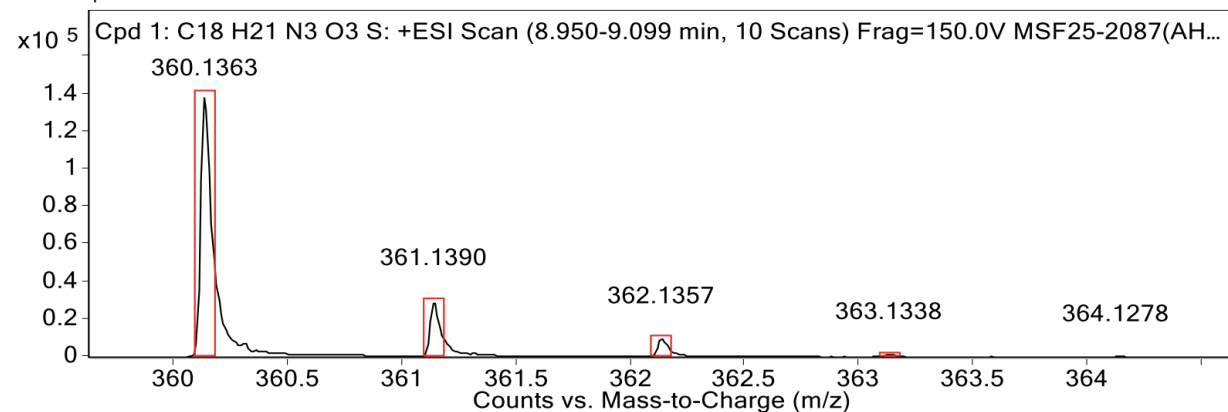

#### MS Spectrum Peak List

| Obs. m/z | Calc. m/z | Charge | Abundance | Formula     | Ion Species | Tgt Mass Error (ppm) |
|----------|-----------|--------|-----------|-------------|-------------|----------------------|
| 146.0701 |           |        | 4780333   |             |             |                      |
| 360.1363 | 360.1376  | 1      | 141517    | C18H21N3O3S | (M+H)+      | 3.69                 |
| 361.1390 | 361.1406  | 1      | 30287     | C18H21N3O3S | (M+H)+      | 4.26                 |
| 362.1357 | 362.1372  | 1      | 9962      | C18H21N3O3S | (M+H)+      | 4.17                 |
| 363.1338 | 363.1386  | 1      | 1560      | C18H21N3O3S | (M+H)+      | 13.17                |

--- End Of Report ---

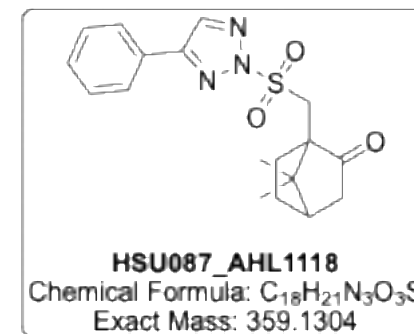

## Target Compound Screening Report

### Results Acquired by The University of Texas at Austin Mass Spectrometry Facility

**Data File** MSF25-2087(AHL1119)\_hrESIposLC1.d **Sample Name** 2087(AHL1119) **Comment** 2087(AHL1119)  
**Position** P1-D1 **Instrument Name** 6530 **User Name**  
**Acq Method** LC\_C18\_pos\_jl.m **Acquired Time** 12/4/2025 7:43:46 PM **DA Method** MSF.m

#### MS Zoomed Spectrum

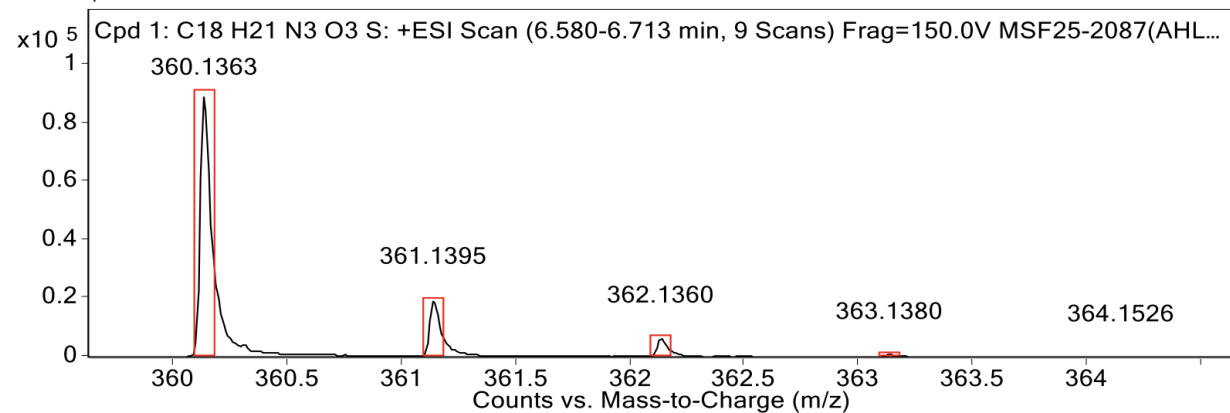

#### MS Spectrum Peak List

| Obs. m/z | Calc. m/z | Charge | Abundance | Formula                                                         | Ion Species        | Tgt Mass Error (ppm) |
|----------|-----------|--------|-----------|-----------------------------------------------------------------|--------------------|----------------------|
| 360.1363 | 360.1376  | 1      | 91013     | C <sub>18</sub> H <sub>21</sub> N <sub>3</sub> O <sub>3</sub> S | (M+H) <sup>+</sup> | 3.61                 |
| 361.1395 | 361.1406  | 1      | 19815     | C <sub>18</sub> H <sub>21</sub> N <sub>3</sub> O <sub>3</sub> S | (M+H) <sup>+</sup> | 2.98                 |
| 362.1360 | 362.1372  | 1      | 6552      | C <sub>18</sub> H <sub>21</sub> N <sub>3</sub> O <sub>3</sub> S | (M+H) <sup>+</sup> | 3.29                 |
| 363.1380 | 363.1386  | 1      | 929       | C <sub>18</sub> H <sub>21</sub> N <sub>3</sub> O <sub>3</sub> S | (M+H) <sup>+</sup> | 1.57                 |
| 364.1526 | 364.1400  | 1      | 101       | C <sub>18</sub> H <sub>21</sub> N <sub>3</sub> O <sub>3</sub> S | (M+H) <sup>+</sup> | -34.75               |

--- End Of Report ---

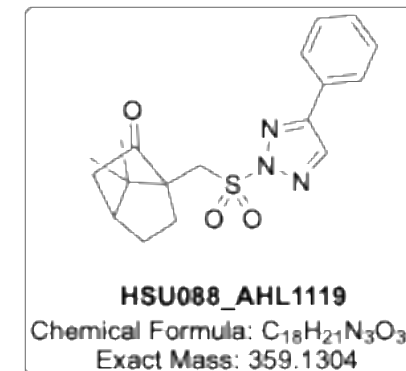

# Target Compound Screening Report

## Results Acquired by The University of Texas at Austin Mass Spectrometry Facility

**Data File** MSF25-2063(AHL1122)\_hrESIpos1.d      **Sample Name** 2063(AHL1122)      **Comment** 2063(AHL1122)  
**Position** P1-E6      **Instrument Name** 6530      **User Name**  
**Acq Method** FIA\_pos.m      **Acquired Time** 12/4/2025 11:12:08 AM      **DA Method** MSF.m

MS Zoomed Spectrum

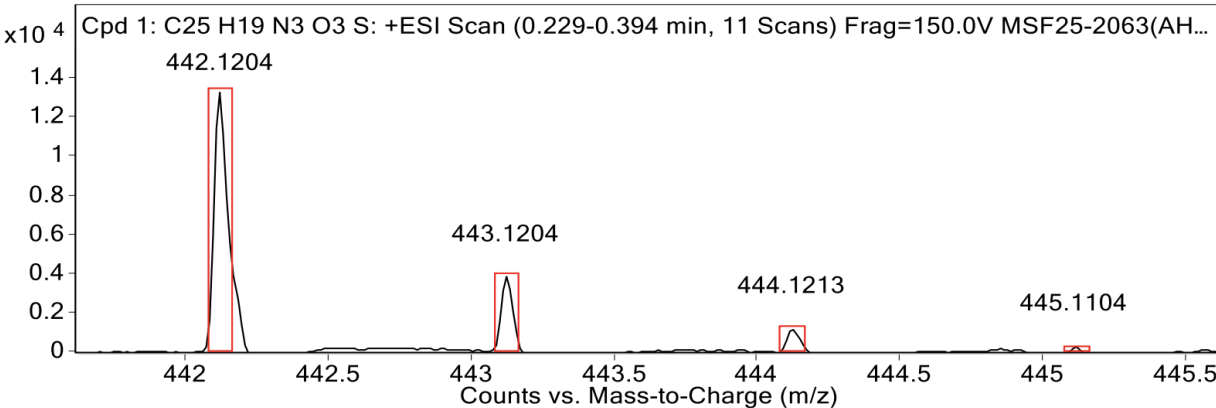

MS Spectrum Peak List

| Obs. m/z | Calc. m/z | Charge | Abundance | Formula                                                         | Ion Species        | Tgt Mass Error (ppm) |
|----------|-----------|--------|-----------|-----------------------------------------------------------------|--------------------|----------------------|
| 442.1204 | 442.1220  | 1      | 13323     | C <sub>25</sub> H <sub>19</sub> N <sub>3</sub> O <sub>3</sub> S | (M+H) <sup>+</sup> | 3.7                  |
| 443.1204 | 443.1250  | 1      | 3886      | C <sub>25</sub> H <sub>19</sub> N <sub>3</sub> O <sub>3</sub> S | (M+H) <sup>+</sup> | 10.41                |
| 444.1213 | 444.1229  | 1      | 1240      | C <sub>25</sub> H <sub>19</sub> N <sub>3</sub> O <sub>3</sub> S | (M+H) <sup>+</sup> | 3.65                 |
| 445.1104 | 445.1238  | 1      | 344       | C <sub>25</sub> H <sub>19</sub> N <sub>3</sub> O <sub>3</sub> S | (M+H) <sup>+</sup> | 30.11                |
| 905.2183 |           |        | 6399613   |                                                                 |                    |                      |

--- End Of Report ---

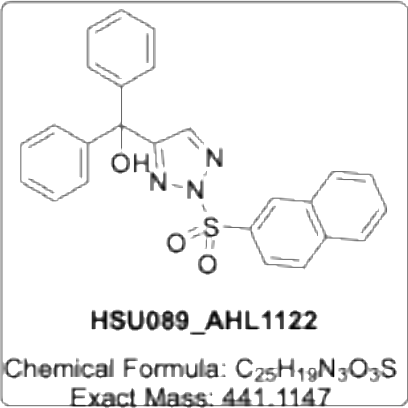

# Target Compound Screening Report

## Results Acquired by The University of Texas at Austin Mass Spectrometry Facility

**Data File** MSF25-2063(AHL1125)\_hrESIposLC1.d **Sample Name** Unavailable **Comment** Sample information is unavailable  
**Position** Unavailable **Instrument Name** Unavailable **User Name** Unavailable  
**Acq Method** **Acquired Time** Unavailable **DA Method** MSF.m

MS Zoomed Spectrum

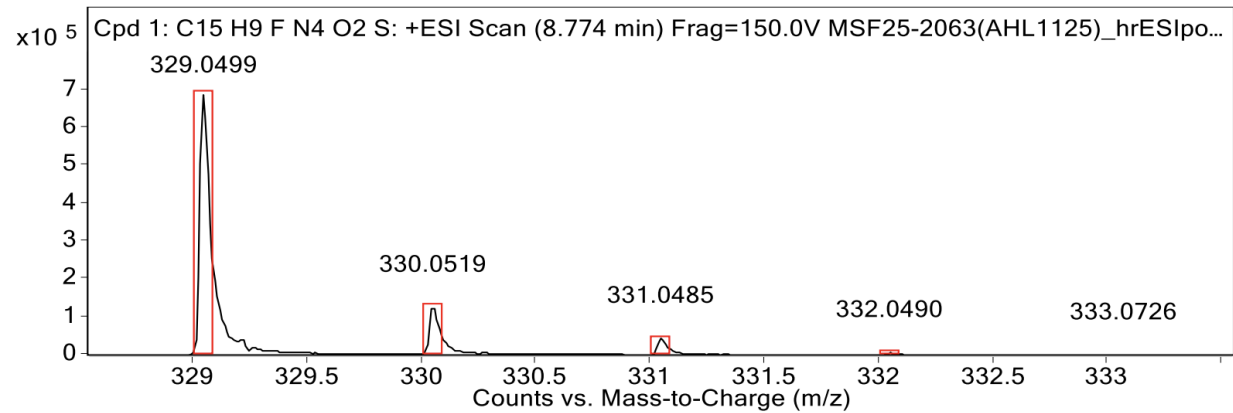

MS Spectrum Peak List

| Obs. m/z | Calc. m/z | Charge | Abundance | Formula                                                         | Ion Species        | Tgt Mass Error (ppm) |
|----------|-----------|--------|-----------|-----------------------------------------------------------------|--------------------|----------------------|
| 329.0499 | 329.0503  | 1      | 695013    | C <sub>15</sub> H <sub>9</sub> FN <sub>4</sub> O <sub>2</sub> S | (M+H) <sup>+</sup> | 1.19                 |
| 330.0519 | 330.0530  | 1      | 126472    | C <sub>15</sub> H <sub>9</sub> FN <sub>4</sub> O <sub>2</sub> S | (M+H) <sup>+</sup> | 3.49                 |
| 331.0485 | 331.0490  | 1      | 44544     | C <sub>15</sub> H <sub>9</sub> FN <sub>4</sub> O <sub>2</sub> S | (M+H) <sup>+</sup> | 1.68                 |
| 332.0490 | 332.0505  | 1      | 6993      | C <sub>15</sub> H <sub>9</sub> FN <sub>4</sub> O <sub>2</sub> S | (M+H) <sup>+</sup> | 4.49                 |
| 333.0726 | 333.0517  | 1      | 643       | C <sub>15</sub> H <sub>9</sub> FN <sub>4</sub> O <sub>2</sub> S | (M+H) <sup>+</sup> | -62.64               |
| 334.0612 | 334.0533  | 1      | 495       | C <sub>15</sub> H <sub>9</sub> FN <sub>4</sub> O <sub>2</sub> S | (M+H) <sup>+</sup> | -23.8                |

--- End Of Report ---

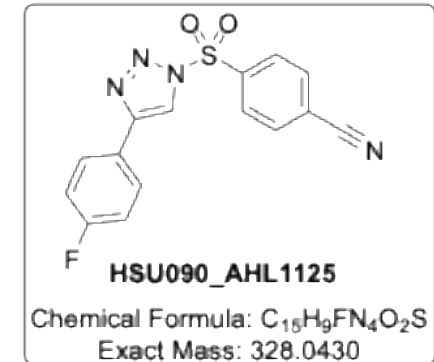

# Target Screening Report

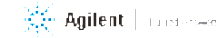

## Results Acquired by The University of Texas at Austin Mass Spectrometry Facility

|                           |                                    |                        |                                   |                  |               |
|---------------------------|------------------------------------|------------------------|-----------------------------------|------------------|---------------|
| <b>Data File</b>          | MSF25-2129(AHL1126)_hrESIsposLC1.d | <b>Sample Name</b>     | 2129(AHL1126)                     | <b>Comment</b>   | 2129(AHL1126) |
| <b>Position</b>           | P1-C4                              | <b>Instrument Name</b> | Instrument 1                      |                  |               |
| <b>Acquisition Method</b> | LC C18 O-DB4 .Lum                  | <b>Acquired Time</b>   | 12/18/2025 8:59:02 PM (UTC-06:00) | <b>DA Method</b> | MSF.m         |

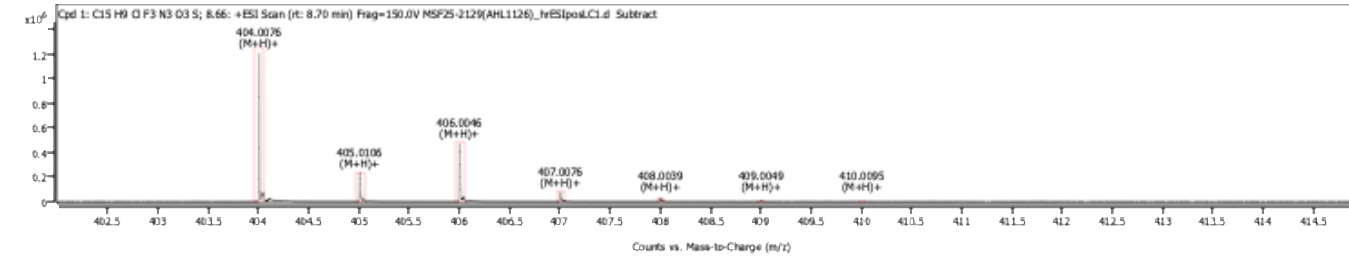

### Spectrum Peaks

| Obs. m/z | Calc. m/z | Charge | Abund   | Formula        | Ion Species | Tgt Mass Error (PPM) |
|----------|-----------|--------|---------|----------------|-------------|----------------------|
| 404.0076 | 404.0078  | 1      | 1250670 | C15H9ClF3N3O3S | (M+H)+      | -0.56                |
| 405.0106 | 405.0106  | 1      | 240559  | C15H9ClF3N3O3S | (M+H)+      | -0.12                |
| 406.0046 | 406.0052  | 1      | 477045  | C15H9ClF3N3O3S | (M+H)+      | -1.49                |
| 407.0076 | 407.0078  | 1      | 78114   | C15H9ClF3N3O3S | (M+H)+      | -0.46                |
| 408.0039 | 408.0041  | 1      | 19458   | C15H9ClF3N3O3S | (M+H)+      | -0.30                |
| 409.0049 | 409.0056  | 1      | 4511    | C15H9ClF3N3O3S | (M+H)+      | -1.71                |
| 410.0095 | 410.0097  | 1      | 517     | C15H9ClF3N3O3S | (M+H)+      | 6.74                 |

MassHunter Qual 10.0  
(End of Report)

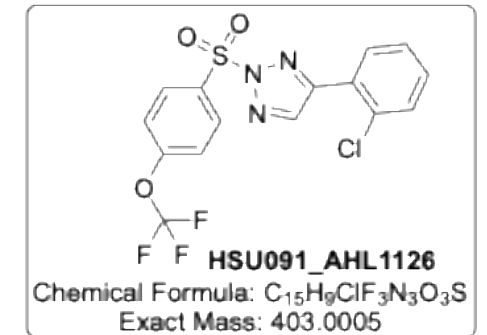

# Target Screening Report

## Results Acquired by The University of Texas at Austin Mass Spectrometry Facility

|                    |                                   |                 |                                   |           |               |
|--------------------|-----------------------------------|-----------------|-----------------------------------|-----------|---------------|
| Data File          | MSF25-2129(AHL2065)_hrESIsolCL1.d | Sample Name     | 2129(AHL2065)                     | Comment   | 2129(AHL2065) |
| Position           | P1-C5                             | Instrument Name | Instrument 1                      |           |               |
| Acquisition Method | LC C18 OBD4 .JLm                  | Acquired Time   | 12/18/2025 9:21:00 PM (UTC-06:00) | DA Method | MSF.m         |

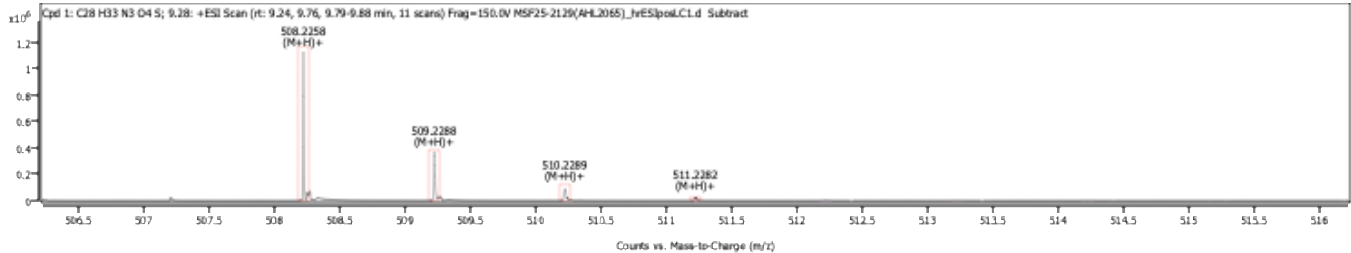

### Spectrum Peaks

| Obs. m/z | Calc. m/z | Charge | Abund   | Formula    | Ion Species | Tgt Mass Error (PPM) |
|----------|-----------|--------|---------|------------|-------------|----------------------|
| 508.2258 | 508.2265  | 1      | 1165402 | C28H33NO4S | (M+H)+      | -1.25                |
| 509.2288 | 509.2285  | 1      | 369669  | C28H33NO4S | (M+H)+      | -1.55                |
| 510.2289 | 510.2280  | 1      | 88122   | C28H33NO4S | (M+H)+      | 1.77                 |
| 511.2282 | 511.2289  | 1      | 20306   | C28H33NO4S | (M+H)+      | -1.32                |
| 536.2096 |           |        | 2465220 |            |             |                      |

MassHunter Qual 10.0  
(End of Report)

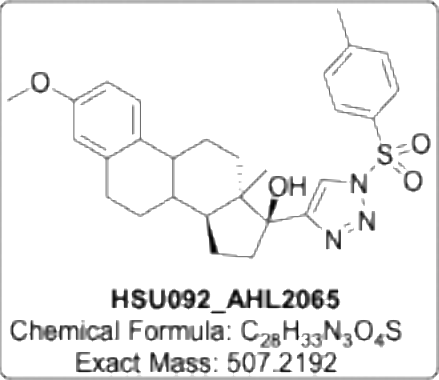

## Target Compound Screening Report

### Results Acquired by The University of Texas at Austin Mass Spectrometry Facility

**Data File** MSF25-2063(JWB230)\_hrESIpos1.d **Sample Name** 2063(JWB230) **Comment** 2063(JWB230)  
**Position** P1-D4 **Instrument Name** 6530 **User Name**  
**Acq Method** FIA\_pos.m **Acquired Time** 12/4/2025 10:49:55 AM **DA Method** MSF.m

MS Zoomed Spectrum

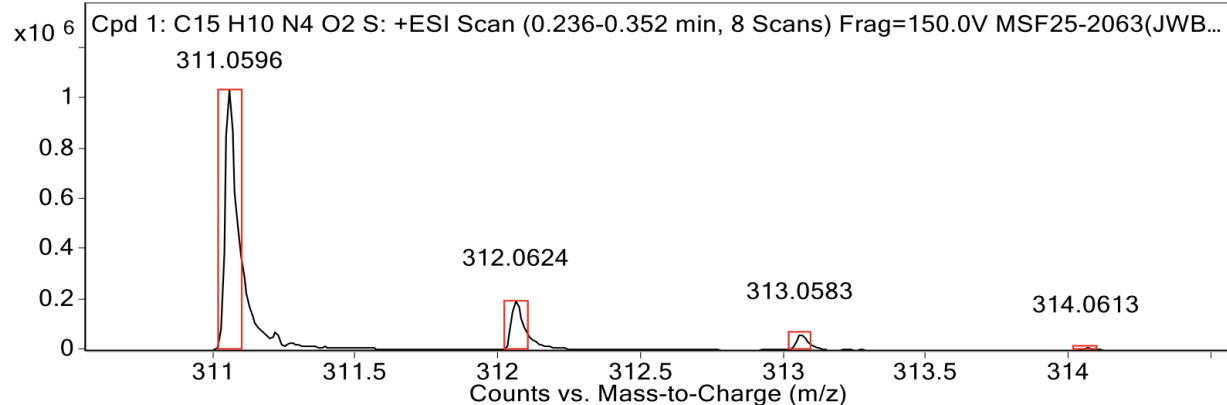

#### MS Spectrum Peak List

| Obs. m/z | Calc. m/z | Charge | Abundance | Formula                                                         | Ion Species        | Tgt Mass Error (ppm) |
|----------|-----------|--------|-----------|-----------------------------------------------------------------|--------------------|----------------------|
| 311.0596 | 311.0597  | 1      | 1034641   | C <sub>15</sub> H <sub>10</sub> N <sub>4</sub> O <sub>2</sub> S | (M+H) <sup>+</sup> | 0.28                 |
| 312.0624 | 312.0624  | 1      | 196895    | C <sub>15</sub> H <sub>10</sub> N <sub>4</sub> O <sub>2</sub> S | (M+H) <sup>+</sup> | 0.21                 |
| 313.0583 | 313.0585  | 1      | 64033     | C <sub>15</sub> H <sub>10</sub> N <sub>4</sub> O <sub>2</sub> S | (M+H) <sup>+</sup> | 0.69                 |
| 314.0613 | 314.0599  | 1      | 10785     | C <sub>15</sub> H <sub>10</sub> N <sub>4</sub> O <sub>2</sub> S | (M+H) <sup>+</sup> | -4.5                 |
| 333.0414 |           |        | 1629377   |                                                                 |                    |                      |

--- End Of Report ---

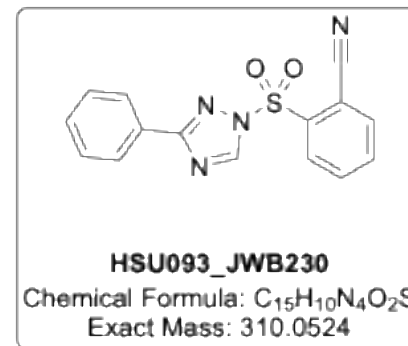

## Target Compound Screening Report

### Results Acquired by The University of Texas at Austin Mass Spectrometry Facility

**Data File** MSF25-2063(JWB234)\_hrESIposLC1.d **Sample Name** 2063(JWB234) **Comment** 2063(JWB234)  
**Position** P1-D5 **Instrument Name** 6530 **User Name**  
**Acq Method** LC\_C18\_pos\_jl.m **Acquired Time** 12/4/2025 1:13:39 PM **DA Method** MSF.m

#### MS Zoomed Spectrum

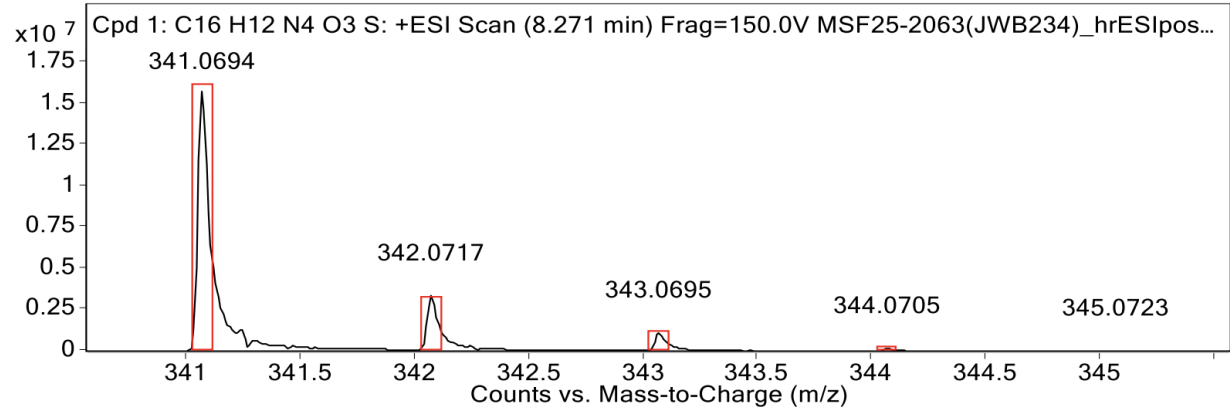

#### MS Spectrum Peak List

| Obs. m/z | Calc. m/z | Charge | Abundance | Formula     | Ion Species | Tgt Mass Error (ppm) |
|----------|-----------|--------|-----------|-------------|-------------|----------------------|
| 341.0694 | 341.0703  | 1      | 16007025  | C16H12N4O3S | (M+H)+      | 2.53                 |
| 342.0717 | 342.0730  | 1      | 3361506   | C16H12N4O3S | (M+H)+      | 4.05                 |
| 343.0695 | 343.0694  | 1      | 1111244   | C16H12N4O3S | (M+H)+      | -0.08                |
| 344.0705 | 344.0709  | 1      | 165984    | C16H12N4O3S | (M+H)+      | 0.99                 |
| 345.0723 | 345.0721  | 1      | 20594     | C16H12N4O3S | (M+H)+      | -0.61                |

--- End Of Report ---

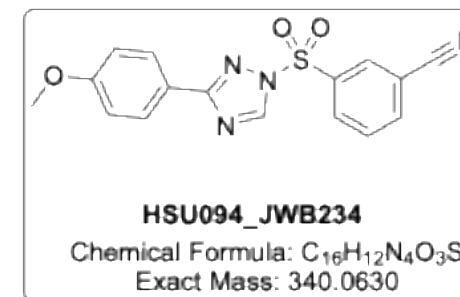

Supplement: d5sc07398g1.pdf [file d5sc07398g1.pdf]
