# Supplementary material for: Protein tyrosine phosphatase inactivation by electrophilic tyrosine modification
Source: Royal Society of Chemistry journal article supplement (doi:10.1039/d5sc07398g), 2026-01-01
Supplement: d5sc07398g3.pdf [file d5sc07398g3.pdf]

**Table S1.** % PTP activity after SuTEx ligand treatment. Compounds are ordered by activity against SHP2.

**Table S2.** PTP peptides detected after DML189 treatment and tryptic digest (reducing)

**Table S3.** Fitness list for DML189 docking with SHP2 at Y279

**Table S4.** SHP peptides detected after DML189 treatment, tryptic digest, and EThcD (non-reducing)
