# Supplementary material for: Protein tyrosine phosphatase inactivation by electrophilic tyrosine modification
Source: Chem Sci. 2026 Jan 19;17(10):5163–71. doi: 10.1039/d5sc07398g (PMC12814959; doi:10.1039/d5sc07398g)
Supplement: SC-017-D5SC07398G-s002 [file SC-017-D5SC07398G-s002.xlsx]

## Sheet: Table S2 (reducing)
SHP1, DML189, HCD
PID	Prot._x000D_ Rank	Pos.	Sequence_x000D_ (unformatted)	Mods_x000D_ (variable)	Glycans	PEP_x000D_ 2D	PEP_x000D_ 1D	|Log Prob|	Score	Delta_x000D_ Score	Delta Mod._x000D_ Score	z	Obs._x000D_ m/z	Calc._x000D_ m/z	ppm_x000D_ err.	Off-_x000D_ By-X	Obs._x000D_ MH	Calc._x000D_ MH	Cleavage	Glycans_x000D_ Pos.	Protein_x000D_ Name	Prot._x000D_ Id	Scan_x000D_ Time	Scan #	Mods_x000D_ (fixed)	Comment	Fragment_x000D_ Type	FDR_x000D_ 2D	FDR_x000D_ 1D	FDR uniq._x000D_ 2D	FDR uniq._x000D_ 1D	q-value_x000D_ 2D	q-value_x000D_ 1D	Scan info	MobilityValue
1 | 1091	1	265	K.FIY[+320.01030]VAIAQFIETTKK.K	Y3(DML189 / 320.0103)		7.5e-07	7.6e-07	6.12	483.6	424.6	424.6	3	698.01	698.008	3.38		2092.02	2092.01	Specific		>sp|SHP1Ca|SHP1 Catalytic (245-543)	1	25.6852	controllerType=0 controllerNumber=1 scan=15788		20231130_vapa_xj04_mlwiii147c_nonpolargrad_dechange_hcd38.ScanId;v=1;d1=15788.15788.3	hcd	0	0	0	0	1.4e-07	1.5e-07	FTMS + c NSI d Full ms2 698.3440@hcd38.00 [120.0000-2000.0000]
2 | 821	1	265	K.FIY[+320.01030]VAIAQFIETTK.K	Y3(DML189 / 320.0103)		1.8e-06	1.8e-06	5.74	467.5	427.4	427.4	3	655.311	655.31	2.42		1963.92	1963.91	Specific		>sp|SHP1Ca|SHP1 Catalytic (245-543)	1	26.6083	controllerType=0 controllerNumber=1 scan=16548		20231130_vapa_xj04_mlwiii147c_nonpolargrad_dechange_hcd38.ScanId;v=1;d1=16548.16548.3	hcd	0	0	0	0	3.8e-07	3.9e-07	FTMS + c NSI d Full ms2 655.3110@hcd38.00 [120.0000-1976.0000]
3 | 1608	1	254	R.SGMVQTEAQYKFIY[+320.01030]VAIAQFIETTK.K	Y14(DML189 / 320.0103)		1.4e-06	1.4e-06	5.85	525.2	525.2	15.9	3	1062.84	1062.83	4.01		3186.49	3186.48	Specific		>sp|SHP1Ca|SHP1 Catalytic (245-543)	1	27.5374	controllerType=0 controllerNumber=1 scan=17147		20231130_vapa_xj04_mlwiii147c_nonpolargrad_dechange_hcd38.ScanId;v=1;d1=17147.17147.3	hcd	0	0	0	0	2.9e-07	2.9e-07	FTMS + c NSI d Full ms2 1063.5034@hcd38.00 [120.0000-2000.0000]
4 | 421	1	254	R.SGMVQTEAQY[+320.01030]K.F	Y10(DML189 / 320.0103)		1.6e-05	1.6e-05	4.8	344.7	344.7	53.3	2	781.302	781.3	1.45		1561.6	1561.59	Specific		>sp|SHP1Ca|SHP1 Catalytic (245-543)	1	21.5684	controllerType=0 controllerNumber=1 scan=12127		20231130_vapa_xj04_mlwiii147c_nonpolargrad_dechange_hcd38.ScanId;v=1;d1=12127.12127.2	hcd	0	0	0	0	2.3e-06	2.3e-06	FTMS + c NSI d Full ms2 781.3016@hcd38.00 [120.0000-1573.0000]
5 | 658	1	34	R.Y[+320.01030]KNILPFDHSR.V	Y1(DML189 / 320.0103)		2.7e-05	2.7e-05	4.57	331	331	18.6	4	428.19	428.19	0.3		1709.74	1709.74	Specific		>sp|SHP1Ca|SHP1 Catalytic (245-543)	1	21.7525	controllerType=0 controllerNumber=1 scan=12308		20231130_vapa_xj04_mlwiii147c_nonpolargrad_dechange_hcd38.ScanId;v=1;d1=12308.12308.4	hcd	0	0	0	0	3.6e-06	3.7e-06	FTMS + c NSI d Full ms2 428.1902@hcd38.00 [120.0000-1723.0000]
6 | 786	1	218	R.TGTIIVIDM[+15.99492]LMENISTK.G	M9(Oxidation / 15.9949)		5.5e-07	5.5e-07	6.26	488.6	488.6	71	2	947.998	947.997	0.93		1894.99	1894.99	Specific		>sp|SHP1Ca|SHP1 Catalytic (245-543)	1	24.8278	controllerType=0 controllerNumber=1 scan=15035		20231130_vapa_xj04_mlwiii147c_nonpolargrad_dechange_hcd38.ScanId;v=1;d1=15035.15035.4	hcd	0	0	0	0	1.2e-07	1.2e-07	FTMS + c NSI d Full ms2 948.7066@hcd38.00 [120.0000-2000.0000]
7 | 1369	1	254	R.SGM[+15.99492]VQTEAQYKFIYVAIAQFIETTKK.K	M3(Oxidation / 15.9949)		9.6e-07	9.8e-07	6.02	549.5	549.5	549.5	4	753.397	753.395	2.4		3010.57	3010.56	Specific		>sp|SHP1Ca|SHP1 Catalytic (245-543)	1	25.2528	controllerType=0 controllerNumber=1 scan=15430		20231130_vapa_xj04_mlwiii147c_nonpolargrad_dechange_hcd38.ScanId;v=1;d1=15430.15430.4	hcd	0	0	0	0	2.1e-07	2.1e-07	FTMS + c NSI d Full ms2 753.6483@hcd38.00 [120.0000-2000.0000]
8 | 155	1	254	R.SGM[+15.99492]VQTEAQYK.F	M3(Oxidation / 15.9949)		2.3e-07	2.4e-07	6.63	483.4	483.4	483.4	2	629.294	629.293	1.9		1257.58	1257.58	Specific		>sp|SHP1Ca|SHP1 Catalytic (245-543)	1	17.4068	controllerType=0 controllerNumber=1 scan=8342		20231130_vapa_xj04_mlwiii147c_nonpolargrad_dechange_hcd38.ScanId;v=1;d1=8342.8342.2	hcd	0	0	0	0	5e-08	5.1e-08	FTMS + c NSI d Full ms2 629.2947@hcd38.00 [120.0000-1269.0000]
9 | 1705	1	78	K.TYIASQGC[+57.02146]LEATVNDFWQM[+15.99492]AWQENSRVIVMTTREVEK.G	M19(Oxidation / 15.9949)		0.0052	0.0053	2.28	318.8	318.8	201.3	4	1102.53	1102.53	2.12		4407.09	4407.08	Specific		>sp|SHP1Ca|SHP1 Catalytic (245-543)	1	26.3587	controllerType=0 controllerNumber=1 scan=16357	C8(Carbamidomethyl / 57.0215)	20231130_vapa_xj04_mlwiii147c_nonpolargrad_dechange_hcd38.ScanId;v=1;d1=16357.16357.4	hcd	0	0	0	0	0.00048	0.00048	FTMS + c NSI d Full ms2 1103.0300@hcd38.00 [120.0000-2000.0000]
10 | 1371	1	78	K.TYIASQGC[+57.02146]LEATVNDFWQM[+15.99492]AWQENSR.V	M19(Oxidation / 15.9949)		1.6e-05	1.7e-05	4.78	438.1	438.1	438.1	3	1041.13	1041.13	3.25		3121.39	3121.38	Specific		>sp|SHP1Ca|SHP1 Catalytic (245-543)	1	25.2801	controllerType=0 controllerNumber=1 scan=15449	C8(Carbamidomethyl / 57.0215)	20231130_vapa_xj04_mlwiii147c_nonpolargrad_dechange_hcd38.ScanId;v=1;d1=15449.15449.3	hcd	0	0	0	0	2.5e-06	2.5e-06	FTMS + c NSI d Full ms2 1041.8010@hcd38.00 [120.0000-2000.0000]
11 | 768	1	218	R.TGTIIVIDMLM[+15.99492]ENISTK.G	M11(Oxidation / 15.9949)		5.8e-06	5.8e-06	5.24	462.6	462.6	77.8	3	632.335	632.334	1.92		1894.99	1894.99	Specific		>sp|SHP1Ca|SHP1 Catalytic (245-543)	1	24.2654	controllerType=0 controllerNumber=1 scan=14524		20231130_vapa_xj04_mlwiii147c_nonpolargrad_dechange_hcd38.ScanId;v=1;d1=14524.14524.3	hcd	0	0	0	0	1e-06	1e-06	FTMS + c NSI d Full ms2 632.3345@hcd38.00 [120.0000-1908.0000]
12 | 391	1	119	K.C[+57.02146]VPYWPEVGM[+15.99492]QR.A	M10(Oxidation / 15.9949)		0.00039	0.0004	3.41	334	334	334	2	769.351	769.35	2.01		1537.7	1537.69	Specific		>sp|SHP1Ca|SHP1 Catalytic (245-543)	1	21.0273	controllerType=0 controllerNumber=1 scan=11633	C1(Carbamidomethyl / 57.0215)	20231130_vapa_xj04_mlwiii147c_nonpolargrad_dechange_hcd38.ScanId;v=1;d1=11633.11633.2	hcd	0	0	0	0	3.7e-05	3.8e-05	FTMS + c NSI d Full ms2 769.3511@hcd38.00 [120.0000-1549.0000]
13 | 1067	1	117	R.NK[+320.01030]C[+57.02146]VPYWPEVGMQR.A	K2(DML189 / 320.0103)		0.00011	0.00011	3.98	351.4	349.4	139.1	2	1042.43	1042.43	2.31		2083.85	2083.85	Specific		>sp|SHP1Ca|SHP1 Catalytic (245-543)	1	23.5632	controllerType=0 controllerNumber=1 scan=13891	C3(Carbamidomethyl / 57.0215)	20231130_vapa_xj04_mlwiii147c_nonpolargrad_dechange_hcd38.ScanId;v=1;d1=13891.13891.2	hcd	0	0	0	0	8.6e-06	8.7e-06	FTMS + c NSI d Full ms2 1042.4292@hcd38.00 [120.0000-2000.0000]
14 | 506	1	1	-.GFWEEFESLQK.Q			1.2e-06	1.2e-06	5.92	557.8	557.8	557.8	2	700.331	700.33	1.59		1399.66	1399.65	Specific		>sp|SHP1Ca|SHP1 Catalytic (245-543)	1	23.6774	controllerType=0 controllerNumber=1 scan=13981		20231130_vapa_xj04_mlwiii147c_nonpolargrad_dechange_hcd38.ScanId;v=1;d1=13981.13981.2	hcd	0	0	0	0	2.6e-07	2.6e-07	FTMS + c NSI d Full ms2 700.3314@hcd38.00 [120.0000-1411.0000]
15 | 466	1	2	G.FWEEFESLQK.Q			3.8e-05	3.8e-05	4.42	494.8	494.8	494.8	2	671.822	671.819	3.82		1342.64	1342.63	NRagged		>sp|SHP1Ca|SHP1 Catalytic (245-543)	1	22.4301	controllerType=0 controllerNumber=1 scan=12945		20231130_vapa_xj04_mlwiii147c_nonpolargrad_dechange_hcd38.ScanId;v=1;d1=12945.12945.2	hcd	0	0	0	0	4.8e-06	4.9e-06	FTMS + c NSI d Full ms2 671.8214@hcd38.00 [120.0000-1354.0000]
16 | 126	1	21	R.LEGQRPENK.G			1.2e-06	1.2e-06	5.93	563.5	395.1	395.1	2	535.784	535.783	1.58		1070.56	1070.56	Specific		>sp|SHP1Ca|SHP1 Catalytic (245-543)	1	16.6726	controllerType=0 controllerNumber=1 scan=7715		20231130_vapa_xj04_mlwiii147c_nonpolargrad_dechange_hcd38.ScanId;v=1;d1=7715.7715.2	hcd	0	0	0	0	2.4e-07	2.4e-07	FTMS + c NSI d Full ms2 535.7852@hcd38.00 [120.0000-1082.0000]
17 | 369	1	34	R.YKNILPFDHSR.V			2.2e-07	2.3e-07	6.65	545.1	448.3	448.3	3	463.915	463.914	2.96		1389.73	1389.73	Specific		>sp|SHP1Ca|SHP1 Catalytic (245-543)	1	20.202	controllerType=0 controllerNumber=1 scan=10921		20231130_vapa_xj04_mlwiii147c_nonpolargrad_dechange_hcd38.ScanId;v=1;d1=10921.10921.3	hcd	0	0	0	0	4.9e-08	4.9e-08	FTMS + c NSI d Full ms2 463.9156@hcd38.00 [120.0000-1402.0000]
18 | 309	1	36	K.NILPFDHSR.V			8.6e-07	8.7e-07	6.07	477.5	477.5	477.5	2	549.789	549.788	2.18		1098.57	1098.57	Specific		>sp|SHP1Ca|SHP1 Catalytic (245-543)	1	20.3205	controllerType=0 controllerNumber=1 scan=11023		20231130_vapa_xj04_mlwiii147c_nonpolargrad_dechange_hcd38.ScanId;v=1;d1=11023.11023.2	hcd	0	0	0	0	1.7e-07	1.7e-07	FTMS + c NSI d Full ms2 549.7892@hcd38.00 [120.0000-1110.0000]
19 | 1013	1	45	R.VILQGRDSNIPGSDYINANYIK.N			1.9e-05	1.9e-05	4.73	404.9	404.9	404.9	3	817.428	817.427	0.24		2450.27	2450.27	Specific		>sp|SHP1Ca|SHP1 Catalytic (245-543)	1	21.3133	controllerType=0 controllerNumber=1 scan=11892		20231130_vapa_xj04_mlwiii147c_nonpolargrad_dechange_hcd38.ScanId;v=1;d1=11892.11892.3	hcd	0	0	0	0	2.7e-06	2.8e-06	FTMS + c NSI d Full ms2 817.7621@hcd38.00 [120.0000-2000.0000]
20 | 1258	1	51	R.DSNIPGSDYINANYIKNQLLGPDENAK.T			0.0018	0.0019	2.74	314.7	314.7	314.7	3	988.487	988.484	2.65		2963.45	2963.44	Specific		>sp|SHP1Ca|SHP1 Catalytic (245-543)	1	22.6664	controllerType=0 controllerNumber=1 scan=13133		20231130_vapa_xj04_mlwiii147c_nonpolargrad_dechange_hcd38.ScanId;v=1;d1=13133.13133.3	hcd	0	0	0	0	0.00018	0.00018	FTMS + c NSI d Full ms2 988.8208@hcd38.00 [120.0000-2000.0000]
21 | 632	1	51	R.DSNIPGSDYINANYIK.N			3.8e-07	3.9e-07	6.42	551.4	551.4	551.4	3	595.288	595.288	0.5		1783.85	1783.85	Specific		>sp|SHP1Ca|SHP1 Catalytic (245-543)	1	21.1587	controllerType=0 controllerNumber=1 scan=11743		20231130_vapa_xj04_mlwiii147c_nonpolargrad_dechange_hcd38.ScanId;v=1;d1=11743.11743.3	hcd	0	0	0	0	8.4e-08	8.5e-08	FTMS + c NSI d Full ms2 595.2888@hcd38.00 [120.0000-1796.0000]
22 | 242	1	67	K.NQLLGPDENAK.T			2.2e-05	2.2e-05	4.66	376.6	211.3	211.3	2	599.807	599.807	1.02		1198.61	1198.61	Specific		>sp|SHP1Ca|SHP1 Catalytic (245-543)	1	18.3653	controllerType=0 controllerNumber=1 scan=9203		20231130_vapa_xj04_mlwiii147c_nonpolargrad_dechange_hcd38.ScanId;v=1;d1=9203.9203.2	hcd	0	0	0	0	3.1e-06	3.1e-06	FTMS + c NSI d Full ms2 599.8079@hcd38.00 [120.0000-1210.0000]
23 | 1741	1	78	K.TYIASQGC[+57.02146]LEATVNDFWQMAWQENSRVIVMTTREVEK.G			8.3e-14	8.4e-14	13.08	945.1	889.6	889.6	4	1098.53	1098.53	2.52		4391.1	4391.09	Specific		>sp|SHP1Ca|SHP1 Catalytic (245-543)	1	26.7887	controllerType=0 controllerNumber=1 scan=16673	C8(Carbamidomethyl / 57.0215)	20231130_vapa_xj04_mlwiii147c_nonpolargrad_dechange_hcd38.ScanId;v=1;d1=16673.16673.4	hcd	0	0	0	0	8.3e-14	8.4e-14	FTMS + c NSI d Full ms2 1099.0326@hcd38.00 [120.0000-2000.0000]
24 | 1515	1	78	K.TYIASQGC[+57.02146]LEATVNDFWQMAWQENSRVIVMTTR.E			1.4e-11	1.4e-11	10.85	815.4	815.4	815.4	4	977.22	977.216	3.9		3905.86	3905.84	Specific		>sp|SHP1Ca|SHP1 Catalytic (245-543)	1	26.6957	controllerType=0 controllerNumber=1 scan=16612	C8(Carbamidomethyl / 57.0215)	20231130_vapa_xj04_mlwiii147c_nonpolargrad_dechange_hcd38.ScanId;v=1;d1=16612.16612.4	hcd	0	0	0	0	4.6e-12	4.7e-12	FTMS + c NSI d Full ms2 977.4684@hcd38.00 [120.0000-2000.0000]
25 | 1382	1	78	K.TYIASQGC[+57.02146]LEATVNDFWQMAWQENSR.V			1.2e-10	1.3e-10	9.91	721.3	721.3	721.3	3	1035.8	1035.8	2.77		3105.39	3105.38	Specific		>sp|SHP1Ca|SHP1 Catalytic (245-543)	1	25.5005	controllerType=0 controllerNumber=1 scan=15631	C8(Carbamidomethyl / 57.0215)	20231130_vapa_xj04_mlwiii147c_nonpolargrad_dechange_hcd38.ScanId;v=1;d1=15631.15631.3	hcd	0	0	0	0	3.8e-11	3.9e-11	FTMS + c NSI d Full ms2 1036.1354@hcd38.00 [120.0000-2000.0000]
26 | 634	1	117	R.NKC[+57.02146]VPYWPEVGMQR.A			2.9e-07	2.9e-07	6.54	481.2	388.5	388.5	2	882.422	882.421	1.11		1763.84	1763.84	Specific		>sp|SHP1Ca|SHP1 Catalytic (245-543)	1	21.3943	controllerType=0 controllerNumber=1 scan=11972	C3(Carbamidomethyl / 57.0215)	20231130_vapa_xj04_mlwiii147c_nonpolargrad_dechange_hcd38.ScanId;v=1;d1=11972.11972.2	hcd	0	0	0	0	6.5e-08	6.6e-08	FTMS + c NSI d Full ms2 882.4226@hcd38.00 [120.0000-1775.0000]
27 | 447	1	119	K.C[+57.02146]VPYWPEVGMQR.A			2.5e-07	2.5e-07	6.6	571.1	571.1	571.1	2	761.354	761.352	2.22		1521.7	1521.7	Specific		>sp|SHP1Ca|SHP1 Catalytic (245-543)	1	21.8983	controllerType=0 controllerNumber=1 scan=12449	C1(Carbamidomethyl / 57.0215)	20231130_vapa_xj04_mlwiii147c_nonpolargrad_dechange_hcd38.ScanId;v=1;d1=12449.12449.2	hcd	0	0	0	0	6.2e-08	6.3e-08	FTMS + c NSI d Full ms2 761.3533@hcd38.00 [120.0000-1533.0000]
28 | 1227	1	131	R.AYGPYSVTNC[+57.02146]GEHDTTEYKLRTLQVSPLDNGDLIR.E			1.3e-05	1.3e-05	4.89	416.3	416.3	416.3	4	996.487	996.486	1.09		3982.93	3982.92	Specific		>sp|SHP1Ca|SHP1 Catalytic (245-543)	1	21.8227	controllerType=0 controllerNumber=1 scan=12378	C10(Carbamidomethyl / 57.0215)	20231130_vapa_xj04_mlwiii147c_nonpolargrad_dechange_hcd38.ScanId;v=1;d1=12378.12378.4	hcd	0	0	0	0	1.8e-06	1.8e-06	FTMS + c NSI d Full ms2 996.7387@hcd38.00 [120.0000-2000.0000]
29 | 886	1	131	R.AYGPYSVTNC[+57.02146]GEHDTTEYK.L			6.7e-06	6.8e-06	5.18	492.5	492.5	492.5	3	731.313	731.313	0.62		2191.93	2191.92	Specific		>sp|SHP1Ca|SHP1 Catalytic (245-543)	1	18.9025	controllerType=0 controllerNumber=1 scan=9729	C10(Carbamidomethyl / 57.0215)	20231130_vapa_xj04_mlwiii147c_nonpolargrad_dechange_hcd38.ScanId;v=1;d1=9729.9729.3	hcd	0	0	0	0	1.2e-06	1.2e-06	FTMS + c NSI d Full ms2 730.9758@hcd38.00 [120.0000-2000.0000]
30 | 1687	1	152	R.TLQVSPLDNGDLIREIWHYQYLSWPDHGVPSEPGGVLSFLDQINQR.Q			4.3e-06	4.4e-06	5.36	493.1	493.1	493.1	5	1058.74	1058.73	2.75		5289.65	5289.64	Specific		>sp|SHP1Ca|SHP1 Catalytic (245-543)	1	25.7606	controllerType=0 controllerNumber=1 scan=15848		20231130_vapa_xj04_mlwiii147c_nonpolargrad_dechange_hcd38.ScanId;v=1;d1=15848.15848.5	hcd	0	0	0	0	7.7e-07	7.8e-07	FTMS + c NSI d Full ms2 1059.1377@hcd38.00 [120.0000-2000.0000]
31 | 414	1	152	R.TLQVSPLDNGDLIR.E			1.6e-07	1.7e-07	6.79	559.6	466.5	466.5	2	770.921	770.92	1.65		1540.84	1540.83	Specific		>sp|SHP1Ca|SHP1 Catalytic (245-543)	1	21.5506	controllerType=0 controllerNumber=1 scan=12109		20231130_vapa_xj04_mlwiii147c_nonpolargrad_dechange_hcd38.ScanId;v=1;d1=12109.12109.2	hcd	0	0	0	0	3.2e-08	3.2e-08	FTMS + c NSI d Full ms2 770.9215@hcd38.00 [120.0000-1552.0000]
32 | 1266	1	166	R.EIWHYQYLSWPDHGVPSEPGGVLSFLDQINQR.Q			4.4e-13	4.5e-13	12.36	883.2	883.2	883.2	4	942.714	942.712	3.09		3767.84	3767.82	Specific		>sp|SHP1Ca|SHP1 Catalytic (245-543)	1	24.6732	controllerType=0 controllerNumber=1 scan=14893		20231130_vapa_xj04_mlwiii147c_nonpolargrad_dechange_hcd38.ScanId;v=1;d1=14893.14893.4	hcd	0	0	0	0	3.1e-13	3.1e-13	FTMS + c NSI d Full ms2 943.2135@hcd38.00 [120.0000-2000.0000]
33 | 1673	1	198	R.QESLPHAGPIIVHC[+57.02146]SAGIGRTGTIIVIDMLMENISTKGLDC[+57.02146]DIDIQK.T			0.0002	0.0002	3.71	366.2	366.2	366.2	5	1024.13	1024.12	2.56		5116.61	5116.59	Specific		>sp|SHP1Ca|SHP1 Catalytic (245-543)	1	25.0162	controllerType=0 controllerNumber=1 scan=15218	C14(Carbamidomethyl / 57.0215); C41(Carbamidomethyl / 57.0215)	20231130_vapa_xj04_mlwiii147c_nonpolargrad_dechange_hcd38.ScanId;v=1;d1=15218.15218.5	hcd	0	0	0	0	1.6e-05	1.6e-05	FTMS + c NSI d Full ms2 1024.5272@hcd38.00 [120.0000-2000.0000]
34 | 1361	1	198	R.QESLPHAGPIIVHC[+57.02146]SAGIGRTGTIIVIDMLMENISTK.G			2.1e-06	2.2e-06	5.67	506.7	506.7	506.7	5	792.618	792.617	1.31		3959.06	3959.06	Specific		>sp|SHP1Ca|SHP1 Catalytic (245-543)	1	25.0305	controllerType=0 controllerNumber=1 scan=15232	C14(Carbamidomethyl / 57.0215)	20231130_vapa_xj04_mlwiii147c_nonpolargrad_dechange_hcd38.ScanId;v=1;d1=15232.15232.5	hcd	0	0	0	0	4.4e-07	4.5e-07	FTMS + c NSI d Full ms2 793.0193@hcd38.00 [120.0000-2000.0000]
35 | 991	1	198	R.QESLPHAGPIIVHC[+57.02146]SAGIGR.T			1.1e-12	1.2e-12	11.94	824.8	824.8	824.8	3	700.366	700.365	1.72		2099.09	2099.08	Specific		>sp|SHP1Ca|SHP1 Catalytic (245-543)	1	20.813	controllerType=0 controllerNumber=1 scan=11466	C14(Carbamidomethyl / 57.0215)	20231130_vapa_xj04_mlwiii147c_nonpolargrad_dechange_hcd38.ScanId;v=1;d1=11466.11466.4	hcd	0	0	0	0	4.8e-13	4.8e-13	FTMS + c NSI d Full ms2 701.0380@hcd38.00 [120.0000-2000.0000]
36 | 1412	1	218	R.TGTIIVIDMLMENISTKGLDC[+57.02146]DIDIQK.T			3.6e-09	3.7e-09	8.44	674.4	674.4	674.4	4	759.889	759.888	2.04		3036.54	3036.53	Specific		>sp|SHP1Ca|SHP1 Catalytic (245-543)	1	25.8291	controllerType=0 controllerNumber=1 scan=15897	C21(Carbamidomethyl / 57.0215)	20231130_vapa_xj04_mlwiii147c_nonpolargrad_dechange_hcd38.ScanId;v=1;d1=15897.15897.4	hcd	0	0	0	0	9.8e-10	1e-09	FTMS + c NSI d Full ms2 760.1406@hcd38.00 [120.0000-2000.0000]
37 | 804	1	218	R.TGTIIVIDMLMENISTK.G			1.2e-10	1.2e-10	9.92	722.2	722.2	722.2	3	627.004	627.002	2.87		1879	1878.99	Specific		>sp|SHP1Ca|SHP1 Catalytic (245-543)	1	25.8932	controllerType=0 controllerNumber=1 scan=15949		20231130_vapa_xj04_mlwiii147c_nonpolargrad_dechange_hcd38.ScanId;v=1;d1=15949.15949.3	hcd	0	0	0	0	3.3e-11	3.4e-11	FTMS + c NSI d Full ms2 627.0036@hcd38.00 [120.0000-1892.0000]
38 | 704	1	235	K.GLDC[+57.02146]DIDIQKTIQMVR.A			1.3e-07	1.3e-07	6.88	575	575	575	3	635.658	635.657	1.35		1904.96	1904.96	Specific		>sp|SHP1Ca|SHP1 Catalytic (245-543)	1	22.226	controllerType=0 controllerNumber=1 scan=12764	C4(Carbamidomethyl / 57.0215)	20231130_vapa_xj04_mlwiii147c_nonpolargrad_dechange_hcd38.ScanId;v=1;d1=12764.12764.3	hcd	0	0	0	0	2.5e-08	2.6e-08	FTMS + c NSI d Full ms2 635.9919@hcd38.00 [120.0000-1918.0000]
39 | 281	1	235	K.GLDC[+57.02146]DIDIQK.T			7.2e-06	7.3e-06	5.15	526	378.7	378.7	2	588.783	588.782	1.08		1176.56	1176.56	Specific		>sp|SHP1Ca|SHP1 Catalytic (245-543)	1	19.4047	controllerType=0 controllerNumber=1 scan=10184	C4(Carbamidomethyl / 57.0215)	20231130_vapa_xj04_mlwiii147c_nonpolargrad_dechange_hcd38.ScanId;v=1;d1=10184.10184.2	hcd	0	0	0	0	1.3e-06	1.3e-06	FTMS + c NSI d Full ms2 588.7834@hcd38.00 [120.0000-1188.0000]
40 | 95	1	245	K.TIQMVR.A			2e-05	2e-05	4.7	499	499	499	1	747.418	747.418	0.3		747.418	747.418	Specific		>sp|SHP1Ca|SHP1 Catalytic (245-543)	1	18.9856	controllerType=0 controllerNumber=1 scan=9803		20231130_vapa_xj04_mlwiii147c_nonpolargrad_dechange_hcd38.ScanId;v=1;d1=9803.9803.3	hcd	0	0	0	0	2.9e-06	3e-06	FTMS + c NSI d Full ms2 747.6193@hcd38.00 [120.0000-2000.0000]
41 | 1419	1	251	R.AQRSGMVQTEAQYKFIYVAIAQFIETTK.K			1.5e-10	1.5e-10	9.84	758.5	758.5	758.5	4	806.175	806.172	3.15		3221.68	3221.67	Specific		>sp|SHP1Ca|SHP1 Catalytic (245-543)	1	25.8519	controllerType=0 controllerNumber=1 scan=15915		20231130_vapa_xj04_mlwiii147c_nonpolargrad_dechange_hcd38.ScanId;v=1;d1=15915.15915.4	hcd	0	0	0	0	5.3e-11	5.3e-11	FTMS + c NSI d Full ms2 806.4255@hcd38.00 [120.0000-2000.0000]
42 | 1393	1	254	R.SGMVQTEAQYKFIYVAIAQFIETTKK.K			4.1e-08	4.1e-08	7.39	639.8	639.8	639.8	3	998.862	998.86	2.77		2994.57	2994.56	Specific		>sp|SHP1Ca|SHP1 Catalytic (245-543)	1	25.5427	controllerType=0 controllerNumber=1 scan=15669		20231130_vapa_xj04_mlwiii147c_nonpolargrad_dechange_hcd38.ScanId;v=1;d1=15669.15669.3	hcd	0	0	0	0	7.8e-09	7.9e-09	FTMS + c NSI d Full ms2 999.1957@hcd38.00 [120.0000-2000.0000]
43 | 1495	1	254	R.SGMVQTEAQYKFIYVAIAQFIETTK.K			1e-11	1e-11	10.99	753.2	753.2	753.2	3	956.163	956.161	2.21		2866.48	2866.47	Specific		>sp|SHP1Ca|SHP1 Catalytic (245-543)	1	26.4424	controllerType=0 controllerNumber=1 scan=16415		20231130_vapa_xj04_mlwiii147c_nonpolargrad_dechange_hcd38.ScanId;v=1;d1=16415.16415.4	hcd	0	0	0	0	2.6e-12	2.7e-12	FTMS + c NSI d Full ms2 956.9449@hcd38.00 [120.0000-2000.0000]
44 | 262	1	254	R.SGMVQTEAQYK.F			2.3e-07	2.4e-07	6.63	490	490	490	2	621.295	621.295	0.48		1241.58	1241.58	Specific		>sp|SHP1Ca|SHP1 Catalytic (245-543)	1	18.9631	controllerType=0 controllerNumber=1 scan=9782		20231130_vapa_xj04_mlwiii147c_nonpolargrad_dechange_hcd38.ScanId;v=1;d1=9782.9782.2	hcd	0	0	0	0	5.1e-08	5.2e-08	FTMS + c NSI d Full ms2 621.7964@hcd38.00 [120.0000-1254.0000]
45 | 716	1	265	K.FIYVAIAQFIETTKKK.L			2.6e-09	2.7e-09	8.58	658	512.7	512.7	4	475.78	475.779	2.24		1900.1	1900.09	Specific		>sp|SHP1Ca|SHP1 Catalytic (245-543)	1	23.7054	controllerType=0 controllerNumber=1 scan=14006		20231130_vapa_xj04_mlwiii147c_nonpolargrad_dechange_hcd38.ScanId;v=1;d1=14006.14006.4	hcd	0	0	0	0	5.3e-10	5.3e-10	FTMS + c NSI d Full ms2 476.0305@hcd38.00 [120.0000-1915.0000]
46 | 732	1	265	K.FIYVAIAQFIETTKK.K			1.3e-08	1.3e-08	7.88	641.8	481.7	481.7	3	591.339	591.338	1.56		1772	1772	Specific		>sp|SHP1Ca|SHP1 Catalytic (245-543)	1	24.1263	controllerType=0 controllerNumber=1 scan=14396		20231130_vapa_xj04_mlwiii147c_nonpolargrad_dechange_hcd38.ScanId;v=1;d1=14396.14396.3	hcd	0	0	0	0	3.5e-09	3.6e-09	FTMS + c NSI d Full ms2 591.3387@hcd38.00 [120.0000-1785.0000]
47 | 534	1	265	K.FIYVAIAQFIETTK.K			3.4e-10	3.4e-10	9.47	669.6	583.3	583.3	2	822.457	822.456	2.09		1643.91	1643.9	Specific		>sp|SHP1Ca|SHP1 Catalytic (245-543)	1	24.9945	controllerType=0 controllerNumber=1 scan=15199		20231130_vapa_xj04_mlwiii147c_nonpolargrad_dechange_hcd38.ScanId;v=1;d1=15199.15199.2	hcd	0	0	0	0	9.7e-11	9.9e-11	FTMS + c NSI d Full ms2 822.4577@hcd38.00 [120.0000-1655.0000]
48 | 162	1	279	K.KKLEVLQSQK.G			5.8e-08	5.9e-08	7.24	690.5	503.3	503.3	2	600.871	600.869	2.91		1200.73	1200.73	Specific		>sp|SHP1Ca|SHP1 Catalytic (245-543)	1	17.5487	controllerType=0 controllerNumber=1 scan=8466		20231130_vapa_xj04_mlwiii147c_nonpolargrad_dechange_hcd38.ScanId;v=1;d1=8466.8466.2	hcd	0	0	0	0	9.7e-09	9.8e-09	FTMS + c NSI d Full ms2 600.8715@hcd38.00 [120.0000-1212.0000]
49 | 217	1	280	K.KLEVLQSQK.G			1.2e-10	1.2e-10	9.93	709.5	478.5	478.5	2	536.823	536.822	2.34		1072.64	1072.64	Specific		>sp|SHP1Ca|SHP1 Catalytic (245-543)	1	18.1339	controllerType=0 controllerNumber=1 scan=8990		20231130_vapa_xj04_mlwiii147c_nonpolargrad_dechange_hcd38.ScanId;v=1;d1=8990.8990.2	hcd	0	0	0	0	2.7e-11	2.8e-11	FTMS + c NSI d Full ms2 536.8231@hcd38.00 [120.0000-1084.0000]
50 | 1009	1	281	K.LEVLQSQKGQESEYGNITY.-			0.0017	0.0018	2.76	302.9	302.9	302.9	3	729.36	729.359	2.39		2186.07	2186.06	Specific		>sp|SHP1Ca|SHP1 Catalytic (245-543)	1	21.0092	controllerType=0 controllerNumber=1 scan=11618		20231130_vapa_xj04_mlwiii147c_nonpolargrad_dechange_hcd38.ScanId;v=1;d1=11618.11618.3	hcd	0	0	0	0	0.00016	0.00016	FTMS + c NSI d Full ms2 729.6948@hcd38.00 [120.0000-2000.0000]
51 | 86	1	281	K.LEVLQSQK.G			0.00059	0.0006	3.23	460.2	257.4	257.4	2	472.775	472.774	0.91		944.542	944.541	Specific		>sp|SHP1Ca|SHP1 Catalytic (245-543)	1	18.4189	controllerType=0 controllerNumber=1 scan=9256		20231130_vapa_xj04_mlwiii147c_nonpolargrad_dechange_hcd38.ScanId;v=1;d1=9256.9256.2	hcd	0	0	0	0	6.1e-05	6.2e-05	FTMS + c NSI d Full ms2 472.7746@hcd38.00 [120.0000-956.0000]
52 | 294	1	289	K.GQESEYGNITY.-			0.00038	0.00039	3.42	352.7	352.7	352.7	2	630.773	630.773	1.36		1260.54	1260.54	Specific		>sp|SHP1Ca|SHP1 Catalytic (245-543)	1	19.9245	controllerType=0 controllerNumber=1 scan=10669		20231130_vapa_xj04_mlwiii147c_nonpolargrad_dechange_hcd38.ScanId;v=1;d1=10669.10669.2	hcd	0	0	0	0	3.4e-05	3.4e-05	FTMS + c NSI d Full ms2 630.7734@hcd38.00 [120.0000-1272.0000]
SHP1, DML189, EThcD
PID	Prot._x000D_ Rank	Pos.	Sequence_x000D_ (unformatted)	Mods_x000D_ (variable)	Glycans	PEP_x000D_ 2D	PEP_x000D_ 1D	|Log Prob|	Score	Delta_x000D_ Score	Delta Mod._x000D_ Score	z	Obs._x000D_ m/z	Calc._x000D_ m/z	ppm_x000D_ err.	Off-_x000D_ By-X	Obs._x000D_ MH	Calc._x000D_ MH	Cleavage	Glycans_x000D_ Pos.	Protein_x000D_ Name	Prot._x000D_ Id	Scan_x000D_ Time	Scan #	Mods_x000D_ (fixed)	Comment	Fragment_x000D_ Type	FDR_x000D_ 2D	FDR_x000D_ 1D	FDR uniq._x000D_ 2D	FDR uniq._x000D_ 1D	q-value_x000D_ 2D	q-value_x000D_ 1D	Scan info	MobilityValue
1 | 444	1	289	K.GQESEYGNITY[+320.01030].-	Y11(DML189 / 320.0103)		2.3e-06	2.3e-06	5.64	436.5	436.5	240.2	2	790.778	790.778	0.05		1580.55	1580.55	Specific		>sp|SHP1Ca|SHP1 Catalytic (245-543)	1	23.4245	controllerType=0 controllerNumber=1 scan=5171		20231203_vapa_xj04_mlwiii147c_ethcd.ScanId;v=1;d1=5171.5171.2	ethcd	0	0	0	0	2.7e-07	2.7e-07	FTMS + c NSI d sa Full ms2 790.7772@etd123.41 790.7772@hcd20.00 [120.0000-1592.0000]
2 | 376	1	34	R.Y[+320.01030]KNILPFDHSR.V	Y1(DML189 / 320.0103)		7.8e-08	7.9e-08	7.11	633.5	608.9	42.9	4	428.189	428.19	-1.2		1709.74	1709.74	Specific		>sp|SHP1Ca|SHP1 Catalytic (245-543)	1	22.7309	controllerType=0 controllerNumber=1 scan=4936		20231203_vapa_xj04_mlwiii147c_ethcd.ScanId;v=1;d1=4936.4936.4	ethcd	0	0	0	0	5.8e-09	5.9e-09	FTMS + c NSI d sa Full ms2 428.1898@etd30.85 428.1898@hcd20.00 [120.0000-1723.0000]
3 | 486	1	218	R.TGTIIVIDM[+15.99492]LMENISTK.G	M9(Oxidation / 15.9949)		9.7e-09	9.8e-09	8.01	668.1	668.1	75.6	3	632.332	632.334	-2.82		1894.98	1894.99	Specific		>sp|SHP1Ca|SHP1 Catalytic (245-543)	1	24.8646	controllerType=0 controllerNumber=1 scan=5639		20231203_vapa_xj04_mlwiii147c_ethcd.ScanId;v=1;d1=5639.5639.3	ethcd	0	0	0	0	6.4e-10	6.5e-10	FTMS + c NSI d sa Full ms2 632.6675@etd54.85 632.6675@hcd20.00 [120.0000-1909.0000]
4 | 25	1	104	R.VIVM[+15.99492]TTR.E	M4(Oxidation / 15.9949)		0.00047	0.00048	3.33	313.3	313.3	313.3	2	418.238	418.239	-1.65		835.469	835.471	Specific		>sp|SHP1Ca|SHP1 Catalytic (245-543)	1	17.5642	controllerType=0 controllerNumber=1 scan=3315		20231203_vapa_xj04_mlwiii147c_ethcd.ScanId;v=1;d1=3315.3315.2	ethcd	0	0	0	0	5.3e-05	5.4e-05	FTMS + c NSI d sa Full ms2 418.2384@etd123.41 418.2384@hcd20.00 [120.0000-847.0000]
5 | 656	1	254	R.SGM[+15.99492]VQTEAQYKFIYVAIAQFIETTKK.K	M3(Oxidation / 15.9949)		0.0016	0.0016	2.79	359.5	359.5	359.5	4	753.395	753.395	-0.04		3010.56	3010.56	Specific		>sp|SHP1Ca|SHP1 Catalytic (245-543)	1	25.3814	controllerType=0 controllerNumber=1 scan=5801		20231203_vapa_xj04_mlwiii147c_ethcd.ScanId;v=1;d1=5801.5801.4	ethcd	0	0	0	0	0.00017	0.00017	FTMS + c NSI d sa Full ms2 753.6456@etd30.85 753.6456@hcd20.00 [120.0000-2000.0000]
6 | 21	1	254	R.SGM[+15.99492]VQTEAQYK.F	M3(Oxidation / 15.9949)		9.7e-06	9.8e-06	5.01	459.3	459.3	459.3	2	629.293	629.293	-0.04		1257.58	1257.58	Specific		>sp|SHP1Ca|SHP1 Catalytic (245-543)	1	17.4224	controllerType=0 controllerNumber=1 scan=3273		20231203_vapa_xj04_mlwiii147c_ethcd.ScanId;v=1;d1=3273.3273.2	ethcd	0	0	0	0	1.4e-06	1.4e-06	FTMS + c NSI d sa Full ms2 629.2922@etd123.41 629.2922@hcd20.00 [120.0000-1269.0000]
7 | 562	1	218	R.TGTIIVIDMLM[+15.99492]ENISTK.G	M11(Oxidation / 15.9949)		2.5e-05	2.5e-05	4.61	525.5	525.5	1	3	632.335	632.334	1.44		1894.99	1894.99	Specific		>sp|SHP1Ca|SHP1 Catalytic (245-543)	1	26.6384	controllerType=0 controllerNumber=1 scan=6142		20231203_vapa_xj04_mlwiii147c_ethcd.ScanId;v=1;d1=6142.6142.3	ethcd	0	0	0	0	3.6e-06	3.6e-06	FTMS + c NSI d sa Full ms2 632.3339@etd54.85 632.3339@hcd20.00 [120.0000-1908.0000]
8 | 304	1	119	K.C[+57.02146]VPYWPEVGM[+15.99492]QR.A	M10(Oxidation / 15.9949)		9.9e-06	1e-05	5	552.9	552.9	552.9	3	513.236	513.236	-0.26		1537.69	1537.69	Specific		>sp|SHP1Ca|SHP1 Catalytic (245-543)	1	21.4889	controllerType=0 controllerNumber=1 scan=4524	C1(Carbamidomethyl / 57.0215)	20231203_vapa_xj04_mlwiii147c_ethcd.ScanId;v=1;d1=4524.4524.3	ethcd	0	0	0	0	1.6e-06	1.6e-06	FTMS + c NSI d sa Full ms2 513.2350@etd54.85 513.2350@hcd20.00 [120.0000-1550.0000]
9 | 340	1	34	R.YK[+320.01030]NILPFDHSR.V	K2(DML189 / 320.0103)		0.00028	0.00028	3.55	347.5	347.5	5.6	4	428.189	428.19	-1.48		1709.74	1709.74	Specific		>sp|SHP1Ca|SHP1 Catalytic (245-543)	1	21.8329	controllerType=0 controllerNumber=1 scan=4648		20231203_vapa_xj04_mlwiii147c_ethcd.ScanId;v=1;d1=4648.4648.4	ethcd	0	0	0	0	3.1e-05	3.2e-05	FTMS + c NSI d sa Full ms2 428.1893@etd30.85 428.1893@hcd20.00 [120.0000-1723.0000]
10 | 182	1	1	-.GFWEEFESLQK.Q			6.5e-06	6.6e-06	5.19	519	519	519	2	700.33	700.33	-0.42		1399.65	1399.65	Specific		>sp|SHP1Ca|SHP1 Catalytic (245-543)	1	23.7338	controllerType=0 controllerNumber=1 scan=5269		20231203_vapa_xj04_mlwiii147c_ethcd.ScanId;v=1;d1=5269.5269.2	ethcd	0	0	0	0	1.1e-06	1.1e-06	FTMS + c NSI d sa Full ms2 700.3298@etd123.41 700.3298@hcd20.00 [120.0000-1411.0000]
11 | 146	1	34	R.YKNILPFDHSR.V			8.3e-07	8.4e-07	6.08	574.3	547.4	547.4	3	463.914	463.914	-0.2		1389.73	1389.73	Specific		>sp|SHP1Ca|SHP1 Catalytic (245-543)	1	20.1961	controllerType=0 controllerNumber=1 scan=4108		20231203_vapa_xj04_mlwiii147c_ethcd.ScanId;v=1;d1=4108.4108.3	ethcd	0	0	0	0	7.2e-08	7.3e-08	FTMS + c NSI d sa Full ms2 463.9142@etd54.85 463.9142@hcd20.00 [120.0000-1402.0000]
12 | 168	1	36	K.NILPFDHSR.V			0.00064	0.00065	3.19	462.5	429.5	429.5	2	549.79	549.788	3.4		1098.57	1098.57	Specific		>sp|SHP1Ca|SHP1 Catalytic (245-543)	1	20.3371	controllerType=0 controllerNumber=1 scan=4151		20231203_vapa_xj04_mlwiii147c_ethcd.ScanId;v=1;d1=4151.4151.2	ethcd	0	0	0	0	6.8e-05	6.9e-05	FTMS + c NSI d sa Full ms2 549.7885@etd123.41 549.7885@hcd20.00 [120.0000-1110.0000]
13 | 296	1	45	R.VILQGRDSNIPGSDYINANYIK.N			8.2e-05	8.3e-05	4.09	386.2	386.2	386.2	3	817.426	817.427	-1.1		2450.26	2450.27	Specific		>sp|SHP1Ca|SHP1 Catalytic (245-543)	1	21.368	controllerType=0 controllerNumber=1 scan=4484		20231203_vapa_xj04_mlwiii147c_ethcd.ScanId;v=1;d1=4484.4484.3	ethcd	0	0	0	0	1.1e-05	1.1e-05	FTMS + c NSI d sa Full ms2 817.7600@etd54.85 817.7600@hcd20.00 [120.0000-2000.0000]
14 | 289	1	51	R.DSNIPGSDYINANYIK.N			9.7e-11	9.8e-11	10.01	755.4	755.4	755.4	3	595.287	595.288	-1.75		1783.85	1783.85	Specific		>sp|SHP1Ca|SHP1 Catalytic (245-543)	1	21.2263	controllerType=0 controllerNumber=1 scan=4431		20231203_vapa_xj04_mlwiii147c_ethcd.ScanId;v=1;d1=4431.4431.3	ethcd	0	0	0	0	1.1e-11	1.1e-11	FTMS + c NSI d sa Full ms2 595.2874@etd54.85 595.2874@hcd20.00 [120.0000-1796.0000]
15 | 89	1	67	K.NQLLGPDENAK.T			1.4e-09	1.5e-09	8.84	650.4	569.3	569.3	2	599.807	599.807	0.62		1198.61	1198.61	Specific		>sp|SHP1Ca|SHP1 Catalytic (245-543)	1	18.4243	controllerType=0 controllerNumber=1 scan=3546		20231203_vapa_xj04_mlwiii147c_ethcd.ScanId;v=1;d1=3546.3546.2	ethcd	0	0	0	0	1.3e-10	1.3e-10	FTMS + c NSI d sa Full ms2 599.8068@etd123.41 599.8068@hcd20.00 [120.0000-1210.0000]
16 | 658	1	78	K.TYIASQGC[+57.02146]LEATVNDFWQMAWQENSR.V			1.2e-14	1.2e-14	13.92	979.2	979.2	979.2	3	1035.8	1035.8	0.65		3105.38	3105.38	Specific		>sp|SHP1Ca|SHP1 Catalytic (245-543)	1	25.522	controllerType=0 controllerNumber=1 scan=5839	C8(Carbamidomethyl / 57.0215)	20231203_vapa_xj04_mlwiii147c_ethcd.ScanId;v=1;d1=5839.5839.3	ethcd	0	0	0	0	1.6e-15	1.7e-15	FTMS + c NSI d sa Full ms2 1036.1335@etd54.85 1036.1335@hcd20.00 [120.0000-2000.0000]
17 | 85	1	104	R.VIVMTTR.E			0.00014	0.00015	3.84	409.2	357.5	357.5	2	410.241	410.241	-0.59		819.475	819.476	Specific		>sp|SHP1Ca|SHP1 Catalytic (245-543)	1	18.4161	controllerType=0 controllerNumber=1 scan=3544		20231203_vapa_xj04_mlwiii147c_ethcd.ScanId;v=1;d1=3544.3544.2	ethcd	0	0	0	0	1.8e-05	1.8e-05	FTMS + c NSI d sa Full ms2 410.2412@etd123.41 410.2412@hcd20.00 [120.0000-831.0000]
18 | 356	1	119	K.C[+57.02146]VPYWPEVGMQR.A			4e-08	4e-08	7.4	613	613	613	3	507.903	507.904	-1.52		1521.7	1521.7	Specific		>sp|SHP1Ca|SHP1 Catalytic (245-543)	1	22.0027	controllerType=0 controllerNumber=1 scan=4707	C1(Carbamidomethyl / 57.0215)	20231203_vapa_xj04_mlwiii147c_ethcd.ScanId;v=1;d1=4707.4707.3	ethcd	0	0	0	0	2.8e-09	2.9e-09	FTMS + c NSI d sa Full ms2 507.9041@etd54.85 507.9041@hcd20.00 [120.0000-1534.0000]
19 | 225	1	131	R.AYGPYSVTNC[+57.02146]GEHDTTEYKLR.T			1.6e-14	1.6e-14	13.8	952.1	952.1	952.1	4	616.033	616.033	-0.1		2461.11	2461.11	Specific		>sp|SHP1Ca|SHP1 Catalytic (245-543)	1	19.3916	controllerType=0 controllerNumber=1 scan=3841	C10(Carbamidomethyl / 57.0215)	20231203_vapa_xj04_mlwiii147c_ethcd.ScanId;v=1;d1=3841.3841.4	ethcd	0	0	0	0	2.9e-15	3e-15	FTMS + c NSI d sa Full ms2 616.2833@etd30.85 616.2833@hcd20.00 [120.0000-2000.0000]
20 | 202	1	131	R.AYGPYSVTNC[+57.02146]GEHDTTEYK.L			1.1e-07	1.1e-07	6.95	612.2	612.2	612.2	3	731.311	731.313	-1.8		2191.92	2191.92	Specific		>sp|SHP1Ca|SHP1 Catalytic (245-543)	1	18.8001	controllerType=0 controllerNumber=1 scan=3649	C10(Carbamidomethyl / 57.0215)	20231203_vapa_xj04_mlwiii147c_ethcd.ScanId;v=1;d1=3649.3649.3	ethcd	0	0	0	0	7.7e-09	7.8e-09	FTMS + c NSI d sa Full ms2 731.6466@etd54.85 731.6466@hcd20.00 [120.0000-2000.0000]
21 | 328	1	152	R.TLQVSPLDNGDLIR.E			1.6e-10	1.6e-10	9.79	762.9	711.7	711.7	3	514.281	514.283	-2.08		1540.83	1540.83	Specific		>sp|SHP1Ca|SHP1 Catalytic (245-543)	1	21.6818	controllerType=0 controllerNumber=1 scan=4594		20231203_vapa_xj04_mlwiii147c_ethcd.ScanId;v=1;d1=4594.4594.3	ethcd	0	0	0	0	2e-11	2.1e-11	FTMS + c NSI d sa Full ms2 514.2821@etd54.85 514.2821@hcd20.00 [120.0000-1553.0000]
22 | 616	1	166	R.EIWHYQYLSWPDHGVPSEPGGVLSFLDQINQR.Q			9.9e-31	4.3e-25	30.01	1404.8	1337	1337	5	754.369	754.371	-1.81		3767.82	3767.82	Specific		>sp|SHP1Ca|SHP1 Catalytic (245-543)	1	24.7975	controllerType=0 controllerNumber=1 scan=5613		20231203_vapa_xj04_mlwiii147c_ethcd.ScanId;v=1;d1=5613.5613.5	ethcd	0	0	0	0	9.9e-31	4.3e-25	FTMS + c NSI d sa Full ms2 754.7715@etd19.75 754.7715@hcd20.00 [120.0000-2000.0000]
23 | 642	1	198	R.QESLPHAGPIIVHC[+57.02146]SAGIGRTGTIIVIDMLMENISTKGLDC[+57.02146]DIDIQK.T			9.9e-31	1e-20	30.01	1211.5	1211.5	1211.5	6	853.604	853.605	-1.08		5116.59	5116.59	Specific		>sp|SHP1Ca|SHP1 Catalytic (245-543)	1	25.0559	controllerType=0 controllerNumber=1 scan=5704	C14(Carbamidomethyl / 57.0215); C41(Carbamidomethyl / 57.0215)	20231203_vapa_xj04_mlwiii147c_ethcd.ScanId;v=1;d1=5704.5704.6	ethcd	0	0	0	0	9.9e-31	3.2e-21	FTMS + c NSI d sa Full ms2 854.1057@etd13.71 854.1057@hcd20.00 [120.0000-2000.0000]
24 | 643	1	198	R.QESLPHAGPIIVHC[+57.02146]SAGIGRTGTIIVIDMLMENISTK.G			2.2e-16	2.2e-16	15.66	1084.5	1084.5	1084.5	5	792.616	792.617	-1.24		3959.05	3959.06	Specific		>sp|SHP1Ca|SHP1 Catalytic (245-543)	1	25.1111	controllerType=0 controllerNumber=1 scan=5721	C14(Carbamidomethyl / 57.0215)	20231203_vapa_xj04_mlwiii147c_ethcd.ScanId;v=1;d1=5721.5721.5	ethcd	0	0	0	0	3.1e-17	3.2e-17	FTMS + c NSI d sa Full ms2 793.0173@etd19.75 793.0173@hcd20.00 [120.0000-2000.0000]
25 | 233	1	198	R.QESLPHAGPIIVHC[+57.02146]SAGIGR.T			9.9e-31	1.7e-21	30.01	1181.9	1181.9	1181.9	4	525.525	525.526	-0.79		2099.08	2099.08	Specific		>sp|SHP1Ca|SHP1 Catalytic (245-543)	1	19.7716	controllerType=0 controllerNumber=1 scan=3961	C14(Carbamidomethyl / 57.0215)	20231203_vapa_xj04_mlwiii147c_ethcd.ScanId;v=1;d1=3961.3961.4	ethcd	0	0	0	0	9.9e-31	8e-22	FTMS + c NSI d sa Full ms2 525.7763@etd30.85 525.7763@hcd20.00 [120.0000-2000.0000]
26 | 554	1	218	R.TGTIIVIDMLMENISTK.G			3.7e-13	3.8e-13	12.43	867.2	867.2	867.2	3	627.002	627.002	0.04		1878.99	1878.99	Specific		>sp|SHP1Ca|SHP1 Catalytic (245-543)	1	26.0118	controllerType=0 controllerNumber=1 scan=5976		20231203_vapa_xj04_mlwiii147c_ethcd.ScanId;v=1;d1=5976.5976.3	ethcd	0	0	0	0	5e-14	5.1e-14	FTMS + c NSI d sa Full ms2 627.0022@etd54.85 627.0022@hcd20.00 [120.0000-1892.0000]
27 | 131	1	235	K.GLDC[+57.02146]DIDIQK.T			2.2e-08	2.2e-08	7.66	608.2	498	498	2	588.781	588.782	-1.2		1176.56	1176.56	Specific		>sp|SHP1Ca|SHP1 Catalytic (245-543)	1	19.5075	controllerType=0 controllerNumber=1 scan=3877	C4(Carbamidomethyl / 57.0215)	20231203_vapa_xj04_mlwiii147c_ethcd.ScanId;v=1;d1=3877.3877.2	ethcd	0	0	0	0	1.4e-09	1.4e-09	FTMS + c NSI d sa Full ms2 588.7811@etd123.41 588.7811@hcd20.00 [120.0000-1188.0000]
28 | 687	1	251	R.AQRSGMVQTEAQYKFIYVAIAQFIETTK.K			0.0011	0.0011	2.95	389	389	389	4	806.172	806.172	0.27		3221.67	3221.67	Specific		>sp|SHP1Ca|SHP1 Catalytic (245-543)	1	25.9827	controllerType=0 controllerNumber=1 scan=5968		20231203_vapa_xj04_mlwiii147c_ethcd.ScanId;v=1;d1=5968.5968.4	ethcd	0	0	0	0	0.0001	0.0001	FTMS + c NSI d sa Full ms2 806.6743@etd30.85 806.6743@hcd20.00 [120.0000-2000.0000]
29 | 668	1	254	R.SGMVQTEAQYKFIYVAIAQFIETTKK.K			8.2e-11	8.3e-11	10.08	842.4	842.4	842.4	4	749.397	749.397	0.22		2994.57	2994.56	Specific		>sp|SHP1Ca|SHP1 Catalytic (245-543)	1	25.6612	controllerType=0 controllerNumber=1 scan=5884		20231203_vapa_xj04_mlwiii147c_ethcd.ScanId;v=1;d1=5884.5884.4	ethcd	0	0	0	0	8.4e-12	8.5e-12	FTMS + c NSI d sa Full ms2 749.6489@etd30.85 749.6489@hcd20.00 [120.0000-2000.0000]
30 | 707	1	254	R.SGMVQTEAQYKFIYVAIAQFIETTK.K			4.5e-10	4.6e-10	9.35	759.8	759.8	759.8	4	717.374	717.373	1.25		2866.47	2866.47	Specific		>sp|SHP1Ca|SHP1 Catalytic (245-543)	1	26.6248	controllerType=0 controllerNumber=1 scan=6138		20231203_vapa_xj04_mlwiii147c_ethcd.ScanId;v=1;d1=6138.6138.4	ethcd	0	0	0	0	3.3e-11	3.4e-11	FTMS + c NSI d sa Full ms2 717.6245@etd30.85 717.6245@hcd20.00 [120.0000-2000.0000]
31 | 54	1	254	R.SGMVQTEAQYK.F			1.3e-08	1.4e-08	7.87	674.1	674.1	674.1	2	621.298	621.295	4.42		1241.59	1241.58	Specific		>sp|SHP1Ca|SHP1 Catalytic (245-543)	1	17.8694	controllerType=0 controllerNumber=1 scan=3399		20231203_vapa_xj04_mlwiii147c_ethcd.ScanId;v=1;d1=3399.3399.2	ethcd	0	0	0	0	9.2e-10	9.3e-10	FTMS + c NSI d sa Full ms2 621.2948@etd123.41 621.2948@hcd20.00 [120.0000-1253.0000]
32 | 460	1	265	K.FIYVAIAQFIETTKK.K			3.2e-06	3.2e-06	5.5	539	522.6	522.6	3	591.337	591.338	-0.92		1772	1772	Specific		>sp|SHP1Ca|SHP1 Catalytic (245-543)	1	24.2819	controllerType=0 controllerNumber=1 scan=5437		20231203_vapa_xj04_mlwiii147c_ethcd.ScanId;v=1;d1=5437.5437.3	ethcd	0	0	0	0	3.6e-07	3.7e-07	FTMS + c NSI d sa Full ms2 591.6715@etd54.85 591.6715@hcd20.00 [120.0000-1786.0000]
33 | 494	1	265	K.FIYVAIAQFIETTK.K			3.4e-12	3.5e-12	11.46	824.1	728.4	728.4	2	822.455	822.456	-0.51		1643.9	1643.9	Specific		>sp|SHP1Ca|SHP1 Catalytic (245-543)	1	25.0381	controllerType=0 controllerNumber=1 scan=5697		20231203_vapa_xj04_mlwiii147c_ethcd.ScanId;v=1;d1=5697.5697.2	ethcd	0	0	0	0	5.1e-13	5.2e-13	FTMS + c NSI d sa Full ms2 822.4550@etd123.41 822.4550@hcd20.00 [120.0000-1655.0000]
34 | 50	1	279	K.KKLEVLQSQK.G			2.1e-06	2.1e-06	5.69	559.7	550.2	550.2	3	400.915	400.915	-0.94		1200.73	1200.73	Specific		>sp|SHP1Ca|SHP1 Catalytic (245-543)	1	17.7954	controllerType=0 controllerNumber=1 scan=3379		20231203_vapa_xj04_mlwiii147c_ethcd.ScanId;v=1;d1=3379.3379.3	ethcd	0	0	0	0	2.1e-07	2.1e-07	FTMS + c NSI d sa Full ms2 400.9147@etd54.85 400.9147@hcd20.00 [120.0000-1213.0000]
35 | 269	1	281	K.LEVLQSQKGQESEYGNITY.-			0.0066	0.0067	2.18	343.4	343.4	343.4	3	729.359	729.359	0.55		2186.06	2186.06	Specific		>sp|SHP1Ca|SHP1 Catalytic (245-543)	1	21.0126	controllerType=0 controllerNumber=1 scan=4363		20231203_vapa_xj04_mlwiii147c_ethcd.ScanId;v=1;d1=4363.4363.3	ethcd	0	0	0	0	0.00053	0.00054	FTMS + c NSI d sa Full ms2 729.6927@etd54.85 729.6927@hcd20.00 [120.0000-2000.0000]
36 | 97	1	281	K.LEVLQSQK.G			0.00011	0.00011	3.98	449.6	354.2	354.2	2	472.774	472.774	-1.48		944.54	944.541	Specific		>sp|SHP1Ca|SHP1 Catalytic (245-543)	1	18.5099	controllerType=0 controllerNumber=1 scan=3566		20231203_vapa_xj04_mlwiii147c_ethcd.ScanId;v=1;d1=3566.3566.2	ethcd	0	0	0	0	1.4e-05	1.4e-05	FTMS + c NSI d sa Full ms2 472.7740@etd123.41 472.7740@hcd20.00 [120.0000-956.0000]
37 | 141	1	289	K.GQESEYGNITY.-			6.2e-12	6.3e-12	11.21	753.1	753.1	753.1	2	630.772	630.773	-0.68		1260.54	1260.54	Specific		>sp|SHP1Ca|SHP1 Catalytic (245-543)	1	19.8966	controllerType=0 controllerNumber=1 scan=4010		20231203_vapa_xj04_mlwiii147c_ethcd.ScanId;v=1;d1=4010.4010.2	ethcd	0	0	0	0	1.1e-12	1.1e-12	FTMS + c NSI d sa Full ms2 630.7719@etd123.41 630.7719@hcd20.00 [120.0000-1272.0000]
SHP2, DML189, HCD
PID	Prot._x000D_ Rank	Pos.	Sequence_x000D_ (unformatted)	Mods_x000D_ (variable)	Glycans	PEP_x000D_ 2D	PEP_x000D_ 1D	|Log Prob|	Score	Delta_x000D_ Score	Delta Mod._x000D_ Score	z	Obs._x000D_ m/z	Calc._x000D_ m/z	ppm_x000D_ err.	Off-_x000D_ By-X	Obs._x000D_ MH	Calc._x000D_ MH	Cleavage	Glycans_x000D_ Pos.	Protein_x000D_ Name	Prot._x000D_ Id	Scan_x000D_ Time	Scan #	Mods_x000D_ (fixed)	Comment	Fragment_x000D_ Type	FDR_x000D_ 2D	FDR_x000D_ 1D	FDR uniq._x000D_ 2D	FDR uniq._x000D_ 1D	q-value_x000D_ 2D	q-value_x000D_ 1D	Scan info	MobilityValue
1 | 225	1	38	K.LLY[+320.01030]SR.K	Y3(DML189 / 320.0103)		0.15	0.15	0.82	313.8	313.8	313.8	2	486.2	486.2	-0.11		971.393	971.393	Specific		>sp|SHP2Ca|SHP2 Catalytic (224-528)	1	23.1583	controllerType=0 controllerNumber=1 scan=13170		20231130_vapa_xj04_mlwiii147a_nonpolargrad_dechange_hcd38.ScanId;v=1;d1=13170.13170.2	hcd	0	0	0	0	0.012	0.012	FTMS + c NSI d Full ms2 486.2007@hcd38.00 [120.0000-983.0000]
2 | 1611	1	67	R.VVLHDGDPNEPVSDY[+320.01030]INANIIM[+15.99492]PEFETK.C	Y15(DML189 / 320.0103); M22(Oxidation / 15.9949)		7.8e-05	7.9e-05	4.11	377.3	377.3	257.7	4	874.391	873.887	3.56	2	3494.54	3492.52	Specific		>sp|SHP2Ca|SHP2 Catalytic (224-528)	1	23.8338	controllerType=0 controllerNumber=1 scan=13746		20231130_vapa_xj04_mlwiii147a_nonpolargrad_dechange_hcd38.ScanId;v=1;d1=13746.13746.4	hcd	0	0	0	0	1.3e-05	1.3e-05	FTMS + c NSI d Full ms2 874.8931@hcd38.00 [120.0000-2000.0000]
3 | 1661	1	67	R.VVLHDGDPNEPVSDY[+320.01030]INANIIMPEFETK.C	Y15(DML189 / 320.0103)		1.1e-05	1.1e-05	4.95	432.2	432.2	322.4	3	1159.52	1159.51	1.85		3476.54	3476.53	Specific		>sp|SHP2Ca|SHP2 Catalytic (224-528)	1	24.6472	controllerType=0 controllerNumber=1 scan=14317		20231130_vapa_xj04_mlwiii147a_nonpolargrad_dechange_hcd38.ScanId;v=1;d1=14317.14317.3	hcd	0	0	0	0	2.7e-06	2.7e-06	FTMS + c NSI d Full ms2 1159.8512@hcd38.00 [120.0000-2000.0000]
4 | 857	1	283	R.SGMVQTEAQY[+320.01030]R.F	Y10(DML189 / 320.0103)		1.7e-05	1.7e-05	4.77	464.5	464.5	464.5	2	795.305	795.303	2.47		1589.6	1589.6	Specific		>sp|SHP2Ca|SHP2 Catalytic (224-528)	1	21.9249	controllerType=0 controllerNumber=1 scan=12117		20231130_vapa_xj04_mlwiii147a_nonpolargrad_dechange_hcd38.ScanId;v=1;d1=12117.12117.2	hcd	0	0	0	0	4.6e-06	4.7e-06	FTMS + c NSI d Full ms2 795.3039@hcd38.00 [120.0000-1601.0000]
5 | 859	1	56	R.Y[+320.01030]KNILPFDHTR.V	Y1(DML189 / 320.0103)		3.1e-05	3.2e-05	4.51	369	369	25.7	4	431.695	431.694	2.34		1723.76	1723.75	Specific		>sp|SHP2Ca|SHP2 Catalytic (224-528)	1	21.9267	controllerType=0 controllerNumber=1 scan=12120		20231130_vapa_xj04_mlwiii147a_nonpolargrad_dechange_hcd38.ScanId;v=1;d1=12120.12120.4	hcd	0	0	0	0	8.3e-06	8.4e-06	FTMS + c NSI d Full ms2 431.6941@hcd38.00 [120.0000-1737.0000]
6 | 977	1	227	K.QESIM[+15.99492]DAGPVVVHC[+57.02146]SAGIGR.T	M5(Oxidation / 15.9949)		3e-12	3e-12	11.52	861	861	861	3	700.339	700.338	0.18		2099	2099	Specific		>sp|SHP2Ca|SHP2 Catalytic (224-528)	1	19.7206	controllerType=0 controllerNumber=1 scan=10316	C14(Carbamidomethyl / 57.0215)	20231130_vapa_xj04_mlwiii147a_nonpolargrad_dechange_hcd38.ScanId;v=1;d1=10316.10316.3	hcd	0	0	0	0	1.7e-12	1.7e-12	FTMS + c NSI d Full ms2 700.3386@hcd38.00 [120.0000-2000.0000]
7 | 328	1	129	R.VIVM[+15.99492]TTKEVER.G	M4(Oxidation / 15.9949)		0.0014	0.0014	2.85	343.8	343.8	343.8	3	440.911	440.911	0.66		1320.72	1320.72	Specific		>sp|SHP2Ca|SHP2 Catalytic (224-528)	1	17.6933	controllerType=0 controllerNumber=1 scan=8601		20231130_vapa_xj04_mlwiii147a_nonpolargrad_dechange_hcd38.ScanId;v=1;d1=8601.8601.3	hcd	0	0	0	0	9e-05	9.2e-05	FTMS + c NSI d Full ms2 440.9116@hcd38.00 [120.0000-1333.0000]
8 | 318	1	283	R.SGM[+15.99492]VQTEAQYR.F	M3(Oxidation / 15.9949)		6.8e-06	6.9e-06	5.17	524.3	481.4	481.4	2	643.297	643.296	2.21		1285.59	1285.58	Specific		>sp|SHP2Ca|SHP2 Catalytic (224-528)	1	17.5091	controllerType=0 controllerNumber=1 scan=8441		20231130_vapa_xj04_mlwiii147a_nonpolargrad_dechange_hcd38.ScanId;v=1;d1=8441.8441.2	hcd	0	0	0	0	1.2e-06	1.2e-06	FTMS + c NSI d Full ms2 643.2977@hcd38.00 [120.0000-1297.0000]
9 | 1357	1	67	R.VVLHDGDPNEPVSDYINANIIM[+15.99492]PEFETKC[+57.02146]NNSKPK.K	M22(Oxidation / 15.9949)		0.054	0.055	1.27	304.6	304.6	304.6	5	800.988	800.987	1.41		4000.91	4000.91	Specific		>sp|SHP2Ca|SHP2 Catalytic (224-528)	1	22.0799	controllerType=0 controllerNumber=1 scan=12255	C29(Carbamidomethyl / 57.0215)	20231130_vapa_xj04_mlwiii147a_nonpolargrad_dechange_hcd38.ScanId;v=1;d1=12255.12255.5	hcd	0	0	0	0	0.0034	0.0034	FTMS + c NSI d Full ms2 801.3878@hcd38.00 [120.0000-2000.0000]
10 | 1453	1	67	R.VVLHDGDPNEPVSDYINANIIM[+15.99492]PEFETK.C	M22(Oxidation / 15.9949)		4.7e-06	4.7e-06	5.33	526.5	526.5	526.5	3	1058.18	1058.18	2.2		3172.52	3172.51	Specific		>sp|SHP2Ca|SHP2 Catalytic (224-528)	1	22.6543	controllerType=0 controllerNumber=1 scan=12742		20231130_vapa_xj04_mlwiii147a_nonpolargrad_dechange_hcd38.ScanId;v=1;d1=12742.12742.3	hcd	0	0	0	0	7e-07	7.1e-07	FTMS + c NSI d Full ms2 1058.5121@hcd38.00 [120.0000-2000.0000]
11 | 99	1	121	R.M[+15.99492]VFQENSR.V	M1(Oxidation / 15.9949)		0.04	0.041	1.4	414.4	255.8	255.8	2	513.738	513.737	1.57		1026.47	1026.47	Specific		>sp|SHP2Ca|SHP2 Catalytic (224-528)	1	17.696	controllerType=0 controllerNumber=1 scan=8605		20231130_vapa_xj04_mlwiii147a_nonpolargrad_dechange_hcd38.ScanId;v=1;d1=8605.8605.2	hcd	0	0	0	0	0.0023	0.0024	FTMS + c NSI d Full ms2 513.7377@hcd38.00 [120.0000-1038.0000]
12 | 27	1	7	R.VRELSK.L			0.0036	0.0036	2.45	454.7	454.7	454.7	1	731.442	731.441	1.87		731.442	731.441	Specific		>sp|SHP2Ca|SHP2 Catalytic (224-528)	1	17.0545	controllerType=0 controllerNumber=1 scan=8074		20231130_vapa_xj04_mlwiii147a_nonpolargrad_dechange_hcd38.ScanId;v=1;d1=8074.8074.2	hcd	0	0	0	0	0.00018	0.00018	FTMS + c NSI d Full ms2 730.8147@hcd38.00 [120.0000-1472.0000]
13 | 622	1	9	R.ELSKLAETTDKVK.Q			1.9e-05	1.9e-05	4.72	531.4	531.4	531.4	2	731.412	731.412	0.46		1461.82	1461.82	Specific		>sp|SHP2Ca|SHP2 Catalytic (224-528)	1	18.2112	controllerType=0 controllerNumber=1 scan=9042		20231130_vapa_xj04_mlwiii147a_nonpolargrad_dechange_hcd38.ScanId;v=1;d1=9042.9042.2	hcd	0	0	0	0	5.2e-06	5.2e-06	FTMS + c NSI d Full ms2 731.4119@hcd38.00 [120.0000-1473.0000]
14 | 1476	1	13	K.LAETTDKVKQGFWEEFETLQQQEC[+57.02146]K.L			1.6e-06	1.6e-06	5.8	579.3	579.3	579.3	4	768.872	768.871	1.19		3072.47	3072.46	Specific		>sp|SHP2Ca|SHP2 Catalytic (224-528)	1	22.8111	controllerType=0 controllerNumber=1 scan=12873	C24(Carbamidomethyl / 57.0215)	20231130_vapa_xj04_mlwiii147a_nonpolargrad_dechange_hcd38.ScanId;v=1;d1=12873.12873.4	hcd	0	0	0	0	1.7e-07	1.7e-07	FTMS + c NSI d Full ms2 769.1229@hcd38.00 [120.0000-2000.0000]
15 | 51	1	13	K.LAETTDKVK.Q			0.96	0.97	0.02	390.9	24	24	2	502.788	502.785	6.13		1004.57	1004.56	Specific		>sp|SHP2Ca|SHP2 Catalytic (224-528)	1	17.0429	controllerType=0 controllerNumber=1 scan=8066		20231130_vapa_xj04_mlwiii147a_nonpolargrad_dechange_hcd38.ScanId;v=1;d1=8066.8066.2	hcd	0.0031	0.0031	0	0	0.13	0.13	FTMS + c NSI d Full ms2 502.7886@hcd38.00 [120.0000-1016.0000]
16 | 1220	1	20	K.VKQGFWEEFETLQQQEC[+57.02146]K.L			8.7e-06	8.8e-06	5.06	555.9	555.9	555.9	3	772.033	772.032	1.22		2314.08	2314.08	Specific		>sp|SHP2Ca|SHP2 Catalytic (224-528)	1	22.8881	controllerType=0 controllerNumber=1 scan=12939	C17(Carbamidomethyl / 57.0215)	20231130_vapa_xj04_mlwiii147a_nonpolargrad_dechange_hcd38.ScanId;v=1;d1=12939.12939.3	hcd	0	0	0	0	1.6e-06	1.7e-06	FTMS + c NSI d Full ms2 772.3679@hcd38.00 [120.0000-2000.0000]
17 | 1635	1	22	K.QGFWEEFETLQQQEC[+57.02146]KLLYSRK.E			1.6e-10	1.7e-10	9.78	784.8	769.7	769.7	4	712.601	712.6	1.94		2847.38	2847.38	Specific		>sp|SHP2Ca|SHP2 Catalytic (224-528)	1	24.392	controllerType=0 controllerNumber=1 scan=14154	C15(Carbamidomethyl / 57.0215)	20231130_vapa_xj04_mlwiii147a_nonpolargrad_dechange_hcd38.ScanId;v=1;d1=14154.14154.4	hcd	0	0	0	0	4.1e-11	4.2e-11	FTMS + c NSI d Full ms2 712.8529@hcd38.00 [120.0000-2000.0000]
18 | 1683	1	22	K.QGFWEEFETLQQQEC[+57.02146]KLLYSR.K			6.2e-07	6.3e-07	6.2	618.7	618.7	618.7	3	907.101	907.099	2.72		2719.29	2719.28	Specific		>sp|SHP2Ca|SHP2 Catalytic (224-528)	1	25.0097	controllerType=0 controllerNumber=1 scan=14534	C15(Carbamidomethyl / 57.0215)	20231130_vapa_xj04_mlwiii147a_nonpolargrad_dechange_hcd38.ScanId;v=1;d1=14534.14534.3	hcd	0	0	0	0	8.7e-08	8.8e-08	FTMS + c NSI d Full ms2 907.4354@hcd38.00 [120.0000-2000.0000]
19 | 1251	1	22	K.QGFWEEFETLQQQEC[+57.02146]K.L			4.1e-10	4.2e-10	9.38	747.3	727.4	727.4	3	696.312	696.311	2.13		2086.92	2086.92	Specific		>sp|SHP2Ca|SHP2 Catalytic (224-528)	1	23.5186	controllerType=0 controllerNumber=1 scan=13479	C15(Carbamidomethyl / 57.0215)	20231130_vapa_xj04_mlwiii147a_nonpolargrad_dechange_hcd38.ScanId;v=1;d1=13479.13479.3	hcd	0	0	0	0	8.2e-11	8.3e-11	FTMS + c NSI d Full ms2 696.6462@hcd38.00 [120.0000-2000.0000]
20 | 747	1	56	R.YKNILPFDHTR.V			9.3e-06	9.4e-06	5.03	562.3	454.3	454.3	3	468.586	468.586	0.5		1403.74	1403.74	Specific		>sp|SHP2Ca|SHP2 Catalytic (224-528)	1	20.534	controllerType=0 controllerNumber=1 scan=10970		20231130_vapa_xj04_mlwiii147a_nonpolargrad_dechange_hcd38.ScanId;v=1;d1=10970.10970.3	hcd	0	0	0	0	1.9e-06	1.9e-06	FTMS + c NSI d Full ms2 468.5866@hcd38.00 [120.0000-1416.0000]
21 | 507	1	58	K.NILPFDHTR.V			3.5e-05	3.5e-05	4.46	490	490	490	2	556.797	556.796	1.14		1112.59	1112.58	Specific		>sp|SHP2Ca|SHP2 Catalytic (224-528)	1	20.7001	controllerType=0 controllerNumber=1 scan=11124		20231130_vapa_xj04_mlwiii147a_nonpolargrad_dechange_hcd38.ScanId;v=1;d1=11124.11124.2	hcd	0	0	0	0	8.7e-06	8.8e-06	FTMS + c NSI d Full ms2 556.7963@hcd38.00 [120.0000-1124.0000]
22 | 1430	1	67	R.VVLHDGDPNEPVSDYINANIIMPEFETKC[+57.02146]NNSKPKK.S			1.5e-06	1.5e-06	5.84	581.2	581.2	581.2	5	823.408	823.407	1.27		4113.01	4113.01	Specific		>sp|SHP2Ca|SHP2 Catalytic (224-528)	1	22.4177	controllerType=0 controllerNumber=1 scan=12540	C29(Carbamidomethyl / 57.0215)	20231130_vapa_xj04_mlwiii147a_nonpolargrad_dechange_hcd38.ScanId;v=1;d1=12540.12540.5	hcd	0	0	0	0	1.5e-07	1.5e-07	FTMS + c NSI d Full ms2 823.8094@hcd38.00 [120.0000-2000.0000]
23 | 1449	1	67	R.VVLHDGDPNEPVSDYINANIIMPEFETKC[+57.02146]NNSKPK.K			6e-08	6e-08	7.22	650.2	650.2	650.2	5	797.789	797.788	1.2		3984.92	3984.91	Specific		>sp|SHP2Ca|SHP2 Catalytic (224-528)	1	22.6213	controllerType=0 controllerNumber=1 scan=12716	C29(Carbamidomethyl / 57.0215)	20231130_vapa_xj04_mlwiii147a_nonpolargrad_dechange_hcd38.ScanId;v=1;d1=12716.12716.5	hcd	0	0	0	0	1.2e-08	1.2e-08	FTMS + c NSI d Full ms2 797.3865@hcd38.00 [120.0000-2000.0000]
24 | 1501	1	67	R.VVLHDGDPNEPVSDYINANIIMPEFETK.C			7.8e-09	7.9e-09	8.11	686.9	686.9	686.9	4	789.887	789.885	2.2		3156.53	3156.52	Specific		>sp|SHP2Ca|SHP2 Catalytic (224-528)	1	23.308	controllerType=0 controllerNumber=1 scan=13283		20231130_vapa_xj04_mlwiii147a_nonpolargrad_dechange_hcd38.ScanId;v=1;d1=13283.13283.4	hcd	0	0	0	0	1.7e-09	1.8e-09	FTMS + c NSI d Full ms2 790.1375@hcd38.00 [120.0000-2000.0000]
25 | 1705	1	102	K.KSYIATQGC[+57.02146]LQNTVNDFWRMVFQENSR.V			1.1e-05	1.1e-05	4.96	524.2	524.2	524.2	4	823.898	823.896	2.48		3292.57	3292.56	Specific		>sp|SHP2Ca|SHP2 Catalytic (224-528)	1	25.3808	controllerType=0 controllerNumber=1 scan=14736	C9(Carbamidomethyl / 57.0215)	20231130_vapa_xj04_mlwiii147a_nonpolargrad_dechange_hcd38.ScanId;v=1;d1=14736.14736.4	hcd	0	0	0	0	2.6e-06	2.6e-06	FTMS + c NSI d Full ms2 824.3998@hcd38.00 [120.0000-2000.0000]
26 | 1183	1	102	K.KSYIATQGC[+57.02146]LQNTVNDFWR.M			5.8e-07	5.9e-07	6.23	570.3	570.3	570.3	3	767.709	767.707	2.23		2301.11	2301.11	Specific		>sp|SHP2Ca|SHP2 Catalytic (224-528)	1	22.6632	controllerType=0 controllerNumber=1 scan=12752	C9(Carbamidomethyl / 57.0215)	20231130_vapa_xj04_mlwiii147a_nonpolargrad_dechange_hcd38.ScanId;v=1;d1=12752.12752.3	hcd	0	0	0	0	7.7e-08	7.8e-08	FTMS + c NSI d Full ms2 768.0435@hcd38.00 [120.0000-2000.0000]
27 | 1223	1	103	K.SYIATQGC[+57.02146]LQNTVNDFWR.M			5.8e-10	5.9e-10	9.23	730.7	730.7	730.7	2	1087.01	1087.01	2.23		2173.02	2173.01	Specific		>sp|SHP2Ca|SHP2 Catalytic (224-528)	1	23.2092	controllerType=0 controllerNumber=1 scan=13210	C8(Carbamidomethyl / 57.0215)	20231130_vapa_xj04_mlwiii147a_nonpolargrad_dechange_hcd38.ScanId;v=1;d1=13210.13210.2	hcd	0	0	0	0	1.1e-10	1.1e-10	FTMS + c NSI d Full ms2 1087.5142@hcd38.00 [120.0000-2000.0000]
28 | 1099	1	121	R.MVFQENSRVIVMTTKEVER.G			5.4e-09	5.5e-09	8.26	676.2	676.2	676.2	3	766.066	766.064	2.59		2296.18	2296.18	Specific		>sp|SHP2Ca|SHP2 Catalytic (224-528)	1	21.2346	controllerType=0 controllerNumber=1 scan=11556		20231130_vapa_xj04_mlwiii147a_nonpolargrad_dechange_hcd38.ScanId;v=1;d1=11556.11556.3	hcd	0	0	0	0	9.3e-10	9.4e-10	FTMS + c NSI d Full ms2 766.4004@hcd38.00 [120.0000-2000.0000]
29 | 151	1	121	R.MVFQENSR.V			0.0006	0.00061	3.22	461.8	325.9	325.9	2	505.74	505.74	1.09		1010.47	1010.47	Specific		>sp|SHP2Ca|SHP2 Catalytic (224-528)	1	18.9388	controllerType=0 controllerNumber=1 scan=9658		20231130_vapa_xj04_mlwiii147a_nonpolargrad_dechange_hcd38.ScanId;v=1;d1=9658.9658.3	hcd	0	0	0	0	5.7e-05	5.7e-05	FTMS + c NSI d Full ms2 505.5969@hcd38.00 [120.0000-1527.0000]
30 | 632	1	129	R.VIVMTTKEVERGK.S			2e-06	2e-06	5.69	546.8	546.8	546.8	3	497.286	497.285	2.07		1489.84	1489.84	Specific		>sp|SHP2Ca|SHP2 Catalytic (224-528)	1	18.2626	controllerType=0 controllerNumber=1 scan=9089		20231130_vapa_xj04_mlwiii147a_nonpolargrad_dechange_hcd38.ScanId;v=1;d1=9089.9089.3	hcd	0	0	0	0	2.5e-07	2.5e-07	FTMS + c NSI d Full ms2 497.2861@hcd38.00 [120.0000-1502.0000]
31 | 406	1	129	R.VIVMTTKEVER.G			2.9e-06	2.9e-06	5.54	575.6	476	476	3	435.58	435.58	1.31		1304.73	1304.72	Specific		>sp|SHP2Ca|SHP2 Catalytic (224-528)	1	18.7282	controllerType=0 controllerNumber=1 scan=9485		20231130_vapa_xj04_mlwiii147a_nonpolargrad_dechange_hcd38.ScanId;v=1;d1=9485.9485.3	hcd	0	0	0	0	3.9e-07	3.9e-07	FTMS + c NSI d Full ms2 435.5798@hcd38.00 [120.0000-1317.0000]
32 | 1146	1	144	K.C[+57.02146]VKYWPDEYALKEYGVMR.V			3.6e-13	3.7e-13	12.44	854	854	854	4	577.53	577.529	2.25		2307.1	2307.09	Specific		>sp|SHP2Ca|SHP2 Catalytic (224-528)	1	22.0186	controllerType=0 controllerNumber=1 scan=12202	C1(Carbamidomethyl / 57.0215)	20231130_vapa_xj04_mlwiii147a_nonpolargrad_dechange_hcd38.ScanId;v=1;d1=12202.12202.4	hcd	0	0	0	0	3.6e-13	3.7e-13	FTMS + c NSI d Full ms2 577.7815@hcd38.00 [120.0000-2000.0000]
33 | 817	1	144	K.C[+57.02146]VKYWPDEYALK.E			2.2e-06	2.2e-06	5.66	592.5	490	490	2	786.382	786.382	0.77		1571.76	1571.76	Specific		>sp|SHP2Ca|SHP2 Catalytic (224-528)	1	21.3361	controllerType=0 controllerNumber=1 scan=11638	C1(Carbamidomethyl / 57.0215)	20231130_vapa_xj04_mlwiii147a_nonpolargrad_dechange_hcd38.ScanId;v=1;d1=11638.11638.2	hcd	0	0	0	0	2.8e-07	2.9e-07	FTMS + c NSI d Full ms2 786.8846@hcd38.00 [120.0000-1584.0000]
34 | 1222	1	147	K.YWPDEYALKEYGVMR.V			1e-08	1e-08	7.99	675.6	675.6	675.6	3	640.639	640.638	1.66		1919.9	1919.9	Specific		>sp|SHP2Ca|SHP2 Catalytic (224-528)	1	22.9128	controllerType=0 controllerNumber=1 scan=12959		20231130_vapa_xj04_mlwiii147a_nonpolargrad_dechange_hcd38.ScanId;v=1;d1=12959.12959.5	hcd	0	0	0	0	3e-09	3e-09	FTMS + c NSI d Full ms2 640.9202@hcd38.00 [120.0000-2000.0000]
35 | 546	1	147	K.YWPDEYALK.E			0.026	0.027	1.58	399.6	202.8	202.8	2	592.786	592.785	2.62		1184.57	1184.56	Specific		>sp|SHP2Ca|SHP2 Catalytic (224-528)	1	21.5548	controllerType=0 controllerNumber=1 scan=11806		20231130_vapa_xj04_mlwiii147a_nonpolargrad_dechange_hcd38.ScanId;v=1;d1=11806.11806.2	hcd	0	0	0	0	0.0013	0.0013	FTMS + c NSI d Full ms2 592.7858@hcd38.00 [120.0000-1196.0000]
36 | 606	1	162	R.VRNVKESAAHDYTLR.E			6.6e-06	6.7e-06	5.18	458.5	458.5	458.5	4	440.487	440.487	0.92		1758.93	1758.92	Specific		>sp|SHP2Ca|SHP2 Catalytic (224-528)	1	17.8575	controllerType=0 controllerNumber=1 scan=8739		20231130_vapa_xj04_mlwiii147a_nonpolargrad_dechange_hcd38.ScanId;v=1;d1=8739.8739.4	hcd	0	0	0	0	1.1e-06	1.1e-06	FTMS + c NSI d Full ms2 440.4866@hcd38.00 [120.0000-1772.0000]
37 | 664	1	164	R.NVKESAAHDYTLRELK.L			8.8e-06	8.9e-06	5.06	502.9	502.9	502.9	3	625.331	625.33	1.58		1873.98	1873.98	Specific		>sp|SHP2Ca|SHP2 Catalytic (224-528)	1	18.7824	controllerType=0 controllerNumber=1 scan=9530		20231130_vapa_xj04_mlwiii147a_nonpolargrad_dechange_hcd38.ScanId;v=1;d1=9530.9530.3	hcd	0	0	0	0	1.7e-06	1.8e-06	FTMS + c NSI d Full ms2 625.3307@hcd38.00 [120.0000-1886.0000]
38 | 588	1	164	R.NVKESAAHDYTLR.E			1.3e-08	1.3e-08	7.89	694.3	679.1	679.1	3	501.925	501.923	2.54		1503.76	1503.76	Specific		>sp|SHP2Ca|SHP2 Catalytic (224-528)	1	17.813	controllerType=0 controllerNumber=1 scan=8704		20231130_vapa_xj04_mlwiii147a_nonpolargrad_dechange_hcd38.ScanId;v=1;d1=8704.8704.3	hcd	0	0	0	0	3.2e-09	3.3e-09	FTMS + c NSI d Full ms2 501.9242@hcd38.00 [120.0000-1516.0000]
39 | 715	1	167	K.ESAAHDYTLRELKLSK.V			1.1e-05	1.1e-05	4.97	431.8	428.6	428.6	3	621	620.999	1.43		1860.98	1860.98	Specific		>sp|SHP2Ca|SHP2 Catalytic (224-528)	1	19.7961	controllerType=0 controllerNumber=1 scan=10379		20231130_vapa_xj04_mlwiii147a_nonpolargrad_dechange_hcd38.ScanId;v=1;d1=10379.10379.3	hcd	0	0	0	0	2.5e-06	2.6e-06	FTMS + c NSI d Full ms2 620.9991@hcd38.00 [120.0000-1873.0000]
40 | 671	1	167	K.ESAAHDYTLRELK.L			4e-09	4.1e-09	8.39	700.6	602.7	602.7	2	766.89	766.889	1.09		1532.77	1532.77	Specific		>sp|SHP2Ca|SHP2 Catalytic (224-528)	1	18.8924	controllerType=0 controllerNumber=1 scan=9623		20231130_vapa_xj04_mlwiii147a_nonpolargrad_dechange_hcd38.ScanId;v=1;d1=9623.9623.2	hcd	0	0	0	0	6.9e-10	7e-10	FTMS + c NSI d Full ms2 766.8897@hcd38.00 [120.0000-1544.0000]
41 | 341	1	167	K.ESAAHDYTLR.E			1.8e-09	1.8e-09	8.74	724.5	724.5	724.5	2	581.779	581.778	1.28		1162.55	1162.55	Specific		>sp|SHP2Ca|SHP2 Catalytic (224-528)	1	17.8914	controllerType=0 controllerNumber=1 scan=8770		20231130_vapa_xj04_mlwiii147a_nonpolargrad_dechange_hcd38.ScanId;v=1;d1=8770.8770.2	hcd	0	0	0	0	2.7e-10	2.7e-10	FTMS + c NSI d Full ms2 581.7783@hcd38.00 [120.0000-1174.0000]
42 | 516	1	195	R.TVWQYHFR.T			0.098	0.099	1.01	455.7	242.3	242.3	2	568.786	568.785	0.26		1136.56	1136.56	Specific		>sp|SHP2Ca|SHP2 Catalytic (224-528)	1	20.8307	controllerType=0 controllerNumber=1 scan=11235		20231130_vapa_xj04_mlwiii147a_nonpolargrad_dechange_hcd38.ScanId;v=1;d1=11235.11235.2	hcd	0	0	0	0	0.007	0.0071	FTMS + c NSI d Full ms2 568.7856@hcd38.00 [120.0000-1148.0000]
43 | 1502	1	203	R.TWPDHGVPSDPGGVLDFLEEVHHK.Q			2.5e-09	2.6e-09	8.6	716.2	716.2	716.2	5	534.462	534.462	1.64		2668.28	2668.28	Specific		>sp|SHP2Ca|SHP2 Catalytic (224-528)	1	23.3086	controllerType=0 controllerNumber=1 scan=13284		20231130_vapa_xj04_mlwiii147a_nonpolargrad_dechange_hcd38.ScanId;v=1;d1=13284.13284.5	hcd	0	0	0	0	4.2e-10	4.2e-10	FTMS + c NSI d Full ms2 534.6630@hcd38.00 [120.0000-2000.0000]
44 | 1075	1	227	K.QESIMDAGPVVVHC[+57.02146]SAGIGR.T			9.3e-12	9.4e-12	11.03	834.1	834.1	834.1	3	695.008	695.007	1.64		2083.01	2083.01	Specific		>sp|SHP2Ca|SHP2 Catalytic (224-528)	1	20.9766	controllerType=0 controllerNumber=1 scan=11366	C14(Carbamidomethyl / 57.0215)	20231130_vapa_xj04_mlwiii147a_nonpolargrad_dechange_hcd38.ScanId;v=1;d1=11366.11366.3	hcd	0	0	0	0	5.1e-12	5.2e-12	FTMS + c NSI d Full ms2 695.3420@hcd38.00 [120.0000-2000.0000]
45 | 940	1	247	R.TGTFIVIDILIDIIR.E			2.6e-05	2.6e-05	4.59	542.7	504.2	504.2	2	851.514	851.511	4.02		1702.02	1702.01	Specific		>sp|SHP2Ca|SHP2 Catalytic (224-528)	1	28.7059	controllerType=0 controllerNumber=1 scan=16804		20231130_vapa_xj04_mlwiii147a_nonpolargrad_dechange_hcd38.ScanId;v=1;d1=16804.16804.2	hcd	0	0	0	0	6.8e-06	6.9e-06	FTMS + c NSI d Full ms2 852.0139@hcd38.00 [120.0000-1715.0000]
46 | 1064	1	262	R.EKGVDC[+57.02146]DIDVPKTIQMVR.S			9.4e-09	9.5e-09	8.03	666.9	666.9	666.9	4	526.52	526.52	1.19		2103.06	2103.06	Specific		>sp|SHP2Ca|SHP2 Catalytic (224-528)	1	20.9335	controllerType=0 controllerNumber=1 scan=11328	C6(Carbamidomethyl / 57.0215)	20231130_vapa_xj04_mlwiii147a_nonpolargrad_dechange_hcd38.ScanId;v=1;d1=11328.11328.4	hcd	0	0	0	0	2.4e-09	2.4e-09	FTMS + c NSI d Full ms2 526.5200@hcd38.00 [120.0000-2000.0000]
47 | 392	1	262	R.EKGVDC[+57.02146]DIDVPK.T			8.6e-07	8.7e-07	6.07	584.5	584.5	584.5	2	687.834	687.832	2.18		1374.66	1374.66	Specific		>sp|SHP2Ca|SHP2 Catalytic (224-528)	1	18.5959	controllerType=0 controllerNumber=1 scan=9365	C6(Carbamidomethyl / 57.0215)	20231130_vapa_xj04_mlwiii147a_nonpolargrad_dechange_hcd38.ScanId;v=1;d1=9365.9365.2	hcd	0	0	0	0	1e-07	1.1e-07	FTMS + c NSI d Full ms2 687.8336@hcd38.00 [120.0000-1386.0000]
48 | 797	1	264	K.GVDC[+57.02146]DIDVPKTIQMVR.S			9.7e-09	9.9e-09	8.01	656.5	656.5	656.5	3	615.98	615.978	2.87		1845.92	1845.92	Specific		>sp|SHP2Ca|SHP2 Catalytic (224-528)	1	21.2311	controllerType=0 controllerNumber=1 scan=11554	C4(Carbamidomethyl / 57.0215)	20231130_vapa_xj04_mlwiii147a_nonpolargrad_dechange_hcd38.ScanId;v=1;d1=11554.11554.3	hcd	0	0	0	0	2.7e-09	2.7e-09	FTMS + c NSI d Full ms2 615.9797@hcd38.00 [120.0000-1858.0000]
49 | 430	1	264	K.GVDC[+57.02146]DIDVPK.T			5.9e-05	6e-05	4.23	452.7	448.9	448.9	2	559.264	559.263	0.6		1117.52	1117.52	Specific		>sp|SHP2Ca|SHP2 Catalytic (224-528)	1	19.0077	controllerType=0 controllerNumber=1 scan=9716	C4(Carbamidomethyl / 57.0215)	20231130_vapa_xj04_mlwiii147a_nonpolargrad_dechange_hcd38.ScanId;v=1;d1=9716.9716.2	hcd	0	0	0	0	1.2e-05	1.2e-05	FTMS + c NSI d Full ms2 559.2638@hcd38.00 [120.0000-1129.0000]
50 | 365	1	283	R.SGMVQTEAQYR.F			2.9e-07	3e-07	6.53	612.2	472.5	472.5	2	635.299	635.298	0.82		1269.59	1269.59	Specific		>sp|SHP2Ca|SHP2 Catalytic (224-528)	1	18.1649	controllerType=0 controllerNumber=1 scan=9001		20231130_vapa_xj04_mlwiii147a_nonpolargrad_dechange_hcd38.ScanId;v=1;d1=9001.9001.2	hcd	0	0	0	0	5e-08	5e-08	FTMS + c NSI d Full ms2 635.2993@hcd38.00 [120.0000-1281.0000]
SHP2, DML189, EThcD
PID	Prot._x000D_ Rank	Pos.	Sequence_x000D_ (unformatted)	Mods_x000D_ (variable)	Glycans	PEP_x000D_ 2D	PEP_x000D_ 1D	|Log Prob|	Score	Delta_x000D_ Score	Delta Mod._x000D_ Score	z	Obs._x000D_ m/z	Calc._x000D_ m/z	ppm_x000D_ err.	Off-_x000D_ By-X	Obs._x000D_ MH	Calc._x000D_ MH	Cleavage	Glycans_x000D_ Pos.	Protein_x000D_ Name	Prot._x000D_ Id	Scan_x000D_ Time	Scan #	Mods_x000D_ (fixed)	Comment	Fragment_x000D_ Type	FDR_x000D_ 2D	FDR_x000D_ 1D	FDR uniq._x000D_ 2D	FDR uniq._x000D_ 1D	q-value_x000D_ 2D	q-value_x000D_ 1D	Scan info	MobilityValue
1 | 297	1	56	R.Y[+320.01030]KNILPFDHTR.V	Y1(DML189 / 320.0103)		1.3e-06	1.3e-06	5.9	593.6	589.2	38.3	4	431.694	431.694	0.22		1723.75	1723.75	Specific		>sp|SHP2Ca|SHP2 Catalytic (224-528)	1	22.8099	controllerType=0 controllerNumber=1 scan=4625		20231203_vapa_xj04_mlwiii147a_ethcd.ScanId;v=1;d1=4625.4625.4	ethcd	0	0	0	0	1.2e-07	1.2e-07	FTMS + c NSI d sa Full ms2 431.6931@etd30.85 431.6931@hcd20.00 [120.0000-1737.0000]
2 | 419	1	227	K.QESIM[+15.99492]DAGPVVVHC[+57.02146]SAGIGR.T	M5(Oxidation / 15.9949)		0.0017	0.0017	2.76	384	384	384	3	700.34	700.338	2.1		2099.01	2099	Specific		>sp|SHP2Ca|SHP2 Catalytic (224-528)	1	19.7174	controllerType=0 controllerNumber=1 scan=3816	C14(Carbamidomethyl / 57.0215)	20231203_vapa_xj04_mlwiii147a_ethcd.ScanId;v=1;d1=3816.3816.3	ethcd	0	0	0	0	0.00018	0.00018	FTMS + c NSI d sa Full ms2 700.3384@etd54.85 700.3384@hcd20.00 [120.0000-2000.0000]
3 | 535	1	67	R.VVLHDGDPNEPVSDYINANIIM[+15.99492]PEFETK.C	M22(Oxidation / 15.9949)		1.2e-15	1.2e-15	14.92	1072.1	1072.1	1072.1	4	793.884	793.884	-0.29		3172.51	3172.51	Specific		>sp|SHP2Ca|SHP2 Catalytic (224-528)	1	22.7212	controllerType=0 controllerNumber=1 scan=4597		20231203_vapa_xj04_mlwiii147a_ethcd.ScanId;v=1;d1=4597.4597.4	ethcd	0	0	0	0	2.7e-16	2.8e-16	FTMS + c NSI d sa Full ms2 794.1354@etd30.85 794.1354@hcd20.00 [120.0000-2000.0000]
4 | 474	1	144	K.C[+57.02146]VKYWPDEYALKEYGVM[+15.99492]R.V	M17(Oxidation / 15.9949)		6e-05	6.1e-05	4.22	593.4	593.4	593.4	4	581.529	581.528	1.9		2323.09	2323.09	Specific		>sp|SHP2Ca|SHP2 Catalytic (224-528)	1	21.4238	controllerType=0 controllerNumber=1 scan=4215	C1(Carbamidomethyl / 57.0215)	20231203_vapa_xj04_mlwiii147a_ethcd.ScanId;v=1;d1=4215.4215.4	ethcd	0	0	0	0	1.3e-05	1.4e-05	FTMS + c NSI d sa Full ms2 581.7792@etd30.85 581.7792@hcd20.00 [120.0000-2000.0000]
5 | 480	1	147	K.YWPDEYALKEYGVM[+15.99492]R.V	M14(Oxidation / 15.9949)		4.2e-05	4.2e-05	4.38	509.5	509.5	509.5	3	645.97	645.97	0.74		1935.9	1935.89	Specific		>sp|SHP2Ca|SHP2 Catalytic (224-528)	1	21.6978	controllerType=0 controllerNumber=1 scan=4288		20231203_vapa_xj04_mlwiii147a_ethcd.ScanId;v=1;d1=4288.4288.3	ethcd	0	0	0	0	9e-06	9.1e-06	FTMS + c NSI d sa Full ms2 646.3044@etd54.85 646.3044@hcd20.00 [120.0000-1949.0000]
6 | 78	1	9	R.ELSKLAETTDKVK.Q			4.8e-05	4.8e-05	4.32	446.8	446.8	446.8	3	487.943	487.943	-0.01		1461.82	1461.82	Specific		>sp|SHP2Ca|SHP2 Catalytic (224-528)	1	18.1877	controllerType=0 controllerNumber=1 scan=3449		20231203_vapa_xj04_mlwiii147a_ethcd.ScanId;v=1;d1=3449.3449.3	ethcd	0	0	0	0	9.9e-06	1e-05	FTMS + c NSI d sa Full ms2 487.9436@etd54.85 487.9436@hcd20.00 [120.0000-1474.0000]
7 | 540	1	13	K.LAETTDKVKQGFWEEFETLQQQEC[+57.02146]K.L			1.1e-16	1.1e-16	15.96	1178	1178	1178	4	768.872	768.871	1.43		3072.47	3072.46	Specific		>sp|SHP2Ca|SHP2 Catalytic (224-528)	1	22.7639	controllerType=0 controllerNumber=1 scan=4610	C24(Carbamidomethyl / 57.0215)	20231203_vapa_xj04_mlwiii147a_ethcd.ScanId;v=1;d1=4610.4610.4	ethcd	0	0	0	0	2.7e-17	4.4e-17	FTMS + c NSI d sa Full ms2 769.1215@etd30.85 769.1215@hcd20.00 [120.0000-2000.0000]
8 | 554	1	20	K.VKQGFWEEFETLQQQEC[+57.02146]K.L			5.4e-06	5.5e-06	5.27	494.2	494.2	494.2	3	772.032	772.032	0.58		2314.08	2314.08	Specific		>sp|SHP2Ca|SHP2 Catalytic (224-528)	1	22.8373	controllerType=0 controllerNumber=1 scan=4634	C17(Carbamidomethyl / 57.0215)	20231203_vapa_xj04_mlwiii147a_ethcd.ScanId;v=1;d1=4634.4634.3	ethcd	0	0	0	0	5.9e-07	5.9e-07	FTMS + c NSI d sa Full ms2 772.3661@etd54.85 772.3661@hcd20.00 [120.0000-2000.0000]
9 | 619	1	22	K.QGFWEEFETLQQQEC[+57.02146]K.L			2.7e-10	2.7e-10	9.57	798.3	798.3	798.3	3	696.311	696.311	0.29		2086.92	2086.92	Specific		>sp|SHP2Ca|SHP2 Catalytic (224-528)	1	23.509	controllerType=0 controllerNumber=1 scan=4841	C15(Carbamidomethyl / 57.0215)	20231203_vapa_xj04_mlwiii147a_ethcd.ScanId;v=1;d1=4841.4841.3	ethcd	0	0	0	0	4.1e-11	4.1e-11	FTMS + c NSI d sa Full ms2 696.6451@etd54.85 696.6451@hcd20.00 [120.0000-2000.0000]
10 | 208	1	54	K.NRYKNILPFDHTR.V			1.8e-11	1.8e-11	10.75	810.8	810.8	810.8	4	419.227	419.227	-0.04		1673.89	1673.89	Specific		>sp|SHP2Ca|SHP2 Catalytic (224-528)	1	20.0835	controllerType=0 controllerNumber=1 scan=3898		20231203_vapa_xj04_mlwiii147a_ethcd.ScanId;v=1;d1=3898.3898.4	ethcd	0	0	0	0	1.8e-12	1.8e-12	FTMS + c NSI d sa Full ms2 419.2274@etd30.85 419.2274@hcd20.00 [120.0000-1687.0000]
11 | 219	1	56	R.YKNILPFDHTR.V			1.4e-05	1.4e-05	4.84	456.1	450.1	450.1	3	468.586	468.586	1.22		1403.74	1403.74	Specific		>sp|SHP2Ca|SHP2 Catalytic (224-528)	1	20.5347	controllerType=0 controllerNumber=1 scan=4001		20231203_vapa_xj04_mlwiii147a_ethcd.ScanId;v=1;d1=4001.4001.3	ethcd	0	0	0	0	2.1e-06	2.2e-06	FTMS + c NSI d sa Full ms2 468.5860@etd54.85 468.5860@hcd20.00 [120.0000-1416.0000]
12 | 227	1	58	K.NILPFDHTR.V			1.7e-05	1.7e-05	4.77	447.1	447.1	447.1	2	556.796	556.796	0.37		1112.59	1112.58	Specific		>sp|SHP2Ca|SHP2 Catalytic (224-528)	1	20.5759	controllerType=0 controllerNumber=1 scan=4013		20231203_vapa_xj04_mlwiii147a_ethcd.ScanId;v=1;d1=4013.4013.2	ethcd	0	0	0	0	3.5e-06	3.5e-06	FTMS + c NSI d sa Full ms2 556.7953@etd123.41 556.7953@hcd20.00 [120.0000-1124.0000]
13 | 518	1	67	R.VVLHDGDPNEPVSDYINANIIMPEFETKC[+57.02146]NNSKPK.K			1.1e-08	1.1e-08	7.96	720.7	720.7	720.7	5	797.788	797.788	-0.49		3984.91	3984.91	Specific		>sp|SHP2Ca|SHP2 Catalytic (224-528)	1	22.6294	controllerType=0 controllerNumber=1 scan=4568	C29(Carbamidomethyl / 57.0215)	20231203_vapa_xj04_mlwiii147a_ethcd.ScanId;v=1;d1=4568.4568.5	ethcd	0	0	0	0	9.4e-10	9.5e-10	FTMS + c NSI d sa Full ms2 798.1894@etd19.75 798.1894@hcd20.00 [120.0000-2000.0000]
14 | 597	1	67	R.VVLHDGDPNEPVSDYINANIIMPEFETK.C			9.9e-31	1.7e-22	30.01	1342.8	1342.8	1342.8	4	789.885	789.885	-0.74		3156.52	3156.52	Specific		>sp|SHP2Ca|SHP2 Catalytic (224-528)	1	23.3457	controllerType=0 controllerNumber=1 scan=4782		20231203_vapa_xj04_mlwiii147a_ethcd.ScanId;v=1;d1=4782.4782.4	ethcd	0	0	0	0	9.9e-31	1.7e-22	FTMS + c NSI d sa Full ms2 790.1361@etd30.85 790.1361@hcd20.00 [120.0000-2000.0000]
15 | 521	1	102	K.KSYIATQGC[+57.02146]LQNTVNDFWR.M			8.6e-11	8.7e-11	10.06	753.1	753.1	753.1	3	767.708	767.707	0.72		2301.11	2301.11	Specific		>sp|SHP2Ca|SHP2 Catalytic (224-528)	1	22.6391	controllerType=0 controllerNumber=1 scan=4571	C9(Carbamidomethyl / 57.0215)	20231203_vapa_xj04_mlwiii147a_ethcd.ScanId;v=1;d1=4571.4571.3	ethcd	0	0	0	0	6.5e-12	6.6e-12	FTMS + c NSI d sa Full ms2 768.0427@etd54.85 768.0427@hcd20.00 [120.0000-2000.0000]
16 | 579	1	103	K.SYIATQGC[+57.02146]LQNTVNDFWR.M			6.4e-09	6.5e-09	8.19	731.8	731.8	731.8	3	725.01	725.009	1.29		2173.02	2173.01	Specific		>sp|SHP2Ca|SHP2 Catalytic (224-528)	1	23.2159	controllerType=0 controllerNumber=1 scan=4737	C8(Carbamidomethyl / 57.0215)	20231203_vapa_xj04_mlwiii147a_ethcd.ScanId;v=1;d1=4737.4737.3	ethcd	0	0	0	0	5.7e-10	5.8e-10	FTMS + c NSI d sa Full ms2 725.3440@etd54.85 725.3440@hcd20.00 [120.0000-2000.0000]
17 | 461	1	121	R.MVFQENSRVIVMTTKEVER.G			2.3e-10	2.3e-10	9.64	757.5	757.5	757.5	4	574.801	574.8	0.59		2296.18	2296.18	Specific		>sp|SHP2Ca|SHP2 Catalytic (224-528)	1	21.1258	controllerType=0 controllerNumber=1 scan=4151		20231203_vapa_xj04_mlwiii147a_ethcd.ScanId;v=1;d1=4151.4151.4	ethcd	0	0	0	0	3e-11	3e-11	FTMS + c NSI d sa Full ms2 575.0513@etd30.85 575.0513@hcd20.00 [120.0000-2000.0000]
18 | 106	1	121	R.MVFQENSR.V			0.0025	0.0025	2.61	346.7	282.5	282.5	2	505.74	505.74	0.31		1010.47	1010.47	Specific		>sp|SHP2Ca|SHP2 Catalytic (224-528)	1	18.6342	controllerType=0 controllerNumber=1 scan=3542		20231203_vapa_xj04_mlwiii147a_ethcd.ScanId;v=1;d1=3542.3542.2	ethcd	0	0	0	0	0.00031	0.00032	FTMS + c NSI d sa Full ms2 506.7402@etd123.41 506.7402@hcd20.00 [120.0000-1024.0000]
19 | 84	1	129	R.VIVMTTKEVERGK.S			0.00048	0.00049	3.32	345.2	345.2	345.2	3	497.285	497.285	0.35		1489.84	1489.84	Specific		>sp|SHP2Ca|SHP2 Catalytic (224-528)	1	18.2645	controllerType=0 controllerNumber=1 scan=3467		20231203_vapa_xj04_mlwiii147a_ethcd.ScanId;v=1;d1=3467.3467.3	ethcd	0	0	0	0	5.5e-05	5.6e-05	FTMS + c NSI d sa Full ms2 497.2852@etd54.85 497.2852@hcd20.00 [120.0000-1502.0000]
20 | 117	1	129	R.VIVMTTKEVER.G			9.8e-07	1e-06	6.01	553.4	553.4	553.4	3	435.58	435.58	0.54		1304.72	1304.72	Specific		>sp|SHP2Ca|SHP2 Catalytic (224-528)	1	18.7026	controllerType=0 controllerNumber=1 scan=3562		20231203_vapa_xj04_mlwiii147a_ethcd.ScanId;v=1;d1=3562.3562.3	ethcd	0	0	0	0	6.5e-08	6.6e-08	FTMS + c NSI d sa Full ms2 435.5792@etd54.85 435.5792@hcd20.00 [120.0000-1317.0000]
21 | 487	1	144	K.C[+57.02146]VKYWPDEYALKEYGVMR.V			9.9e-31	3e-19	30.01	1140.8	1140.8	1140.8	4	577.53	577.529	1.3		2307.1	2307.09	Specific		>sp|SHP2Ca|SHP2 Catalytic (224-528)	1	21.9258	controllerType=0 controllerNumber=1 scan=4360	C1(Carbamidomethyl / 57.0215)	20231203_vapa_xj04_mlwiii147a_ethcd.ScanId;v=1;d1=4360.4360.4	ethcd	0	0	0	0	9.9e-31	1.5e-19	FTMS + c NSI d sa Full ms2 577.7800@etd30.85 577.7800@hcd20.00 [120.0000-2000.0000]
22 | 253	1	144	K.C[+57.02146]VKYWPDEYALK.E			3.8e-05	3.9e-05	4.41	486.9	455	455	3	524.591	524.59	1.5		1571.76	1571.76	Specific		>sp|SHP2Ca|SHP2 Catalytic (224-528)	1	21.3113	controllerType=0 controllerNumber=1 scan=4188	C1(Carbamidomethyl / 57.0215)	20231203_vapa_xj04_mlwiii147a_ethcd.ScanId;v=1;d1=4188.4188.4	ethcd	0	0	0	0	7.3e-06	7.4e-06	FTMS + c NSI d sa Full ms2 524.2883@etd30.85 524.2883@hcd20.00 [120.0000-2000.0000]
23 | 508	1	147	K.YWPDEYALKEYGVMR.V			1.8e-05	1.9e-05	4.74	511.8	511.8	511.8	3	640.638	640.638	0.13		1919.9	1919.9	Specific		>sp|SHP2Ca|SHP2 Catalytic (224-528)	1	22.4696	controllerType=0 controllerNumber=1 scan=4526		20231203_vapa_xj04_mlwiii147a_ethcd.ScanId;v=1;d1=4526.4526.3	ethcd	0	0	0	0	3.9e-06	4e-06	FTMS + c NSI d sa Full ms2 640.9717@etd54.85 640.9717@hcd20.00 [120.0000-1933.0000]
24 | 267	1	147	K.YWPDEYALK.E			1.6e-05	1.6e-05	4.8	544	428.1	428.1	2	592.784	592.785	-0.68		1184.56	1184.56	Specific		>sp|SHP2Ca|SHP2 Catalytic (224-528)	1	21.4996	controllerType=0 controllerNumber=1 scan=4232		20231203_vapa_xj04_mlwiii147a_ethcd.ScanId;v=1;d1=4232.4232.2	ethcd	0	0	0	0	2.8e-06	2.9e-06	FTMS + c NSI d sa Full ms2 592.7853@etd123.41 592.7853@hcd20.00 [120.0000-1196.0000]
25 | 21	1	162	R.VRNVKESAAHDYTLR.E			4.8e-13	4.9e-13	12.32	928.7	922.3	922.3	4	440.486	440.487	-0.75		1758.92	1758.92	Specific		>sp|SHP2Ca|SHP2 Catalytic (224-528)	1	17.6401	controllerType=0 controllerNumber=1 scan=3320		20231203_vapa_xj04_mlwiii147a_ethcd.ScanId;v=1;d1=3320.3320.4	ethcd	0	0	0	0	5.7e-14	5.8e-14	FTMS + c NSI d sa Full ms2 440.4866@etd30.85 440.4866@hcd20.00 [120.0000-1772.0000]
26 | 400	1	164	R.NVKESAAHDYTLRELK.L			3.3e-16	3.3e-16	15.48	1093.6	1093.6	1093.6	4	469.25	469.25	-0.19		1873.98	1873.98	Specific		>sp|SHP2Ca|SHP2 Catalytic (224-528)	1	18.5317	controllerType=0 controllerNumber=1 scan=3521		20231203_vapa_xj04_mlwiii147a_ethcd.ScanId;v=1;d1=3521.3521.4	ethcd	0	0	0	0	9.1e-17	9.3e-17	FTMS + c NSI d sa Full ms2 469.5002@etd30.85 469.5002@hcd20.00 [120.0000-1889.0000]
27 | 56	1	164	R.NVKESAAHDYTLR.E			3.9e-05	4e-05	4.4	464.3	453.6	453.6	3	501.924	501.923	0.78		1503.76	1503.76	Specific		>sp|SHP2Ca|SHP2 Catalytic (224-528)	1	17.9762	controllerType=0 controllerNumber=1 scan=3401		20231203_vapa_xj04_mlwiii147a_ethcd.ScanId;v=1;d1=3401.3401.3	ethcd	0	0	0	0	7.7e-06	7.8e-06	FTMS + c NSI d sa Full ms2 501.9236@etd54.85 501.9236@hcd20.00 [120.0000-1516.0000]
28 | 413	1	167	K.ESAAHDYTLRELKLSK.V			3.5e-15	3.6e-15	14.46	1028.3	1002.2	1002.2	4	466.001	466.001	-0.18		1860.98	1860.98	Specific		>sp|SHP2Ca|SHP2 Catalytic (224-528)	1	19.6971	controllerType=0 controllerNumber=1 scan=3810		20231203_vapa_xj04_mlwiii147a_ethcd.ScanId;v=1;d1=3810.3810.4	ethcd	0	0	0	0	8.7e-16	8.8e-16	FTMS + c NSI d sa Full ms2 466.0002@etd30.85 466.0002@hcd20.00 [120.0000-1875.0000]
29 | 128	1	167	K.ESAAHDYTLRELK.L			0.0006	0.00061	3.22	464.2	456.3	456.3	3	511.597	511.595	3.77		1532.78	1532.77	Specific		>sp|SHP2Ca|SHP2 Catalytic (224-528)	1	18.7758	controllerType=0 controllerNumber=1 scan=3582		20231203_vapa_xj04_mlwiii147a_ethcd.ScanId;v=1;d1=3582.3582.3	ethcd	0	0	0	0	7e-05	7.1e-05	FTMS + c NSI d sa Full ms2 511.5943@etd54.85 511.5943@hcd20.00 [120.0000-1545.0000]
30 | 237	1	195	R.TVWQYHFR.T			0.00025	0.00025	3.6	465.8	366.2	366.2	2	568.786	568.785	0.37		1136.56	1136.56	Specific		>sp|SHP2Ca|SHP2 Catalytic (224-528)	1	20.7377	controllerType=0 controllerNumber=1 scan=4057		20231203_vapa_xj04_mlwiii147a_ethcd.ScanId;v=1;d1=4057.4057.2	ethcd	0	0	0	0	3.1e-05	3.1e-05	FTMS + c NSI d sa Full ms2 569.7878@etd123.41 569.7878@hcd20.00 [120.0000-1150.0000]
31 | 583	1	203	R.TWPDHGVPSDPGGVLDFLEEVHHK.Q			1.1e-16	1.1e-16	15.96	1114.1	1114.1	1114.1	4	667.825	667.825	-0.28		2668.28	2668.28	Specific		>sp|SHP2Ca|SHP2 Catalytic (224-528)	1	23.2765	controllerType=0 controllerNumber=1 scan=4757		20231203_vapa_xj04_mlwiii147a_ethcd.ScanId;v=1;d1=4757.4757.4	ethcd	0	0	0	0	4.4e-17	2.8e-17	FTMS + c NSI d sa Full ms2 668.0767@etd30.85 668.0767@hcd20.00 [120.0000-2000.0000]
32 | 451	1	227	K.QESIMDAGPVVVHC[+57.02146]SAGIGR.T			2.8e-05	2.9e-05	4.55	555.5	555.5	555.5	3	695.007	695.007	0.5		2083.01	2083.01	Specific		>sp|SHP2Ca|SHP2 Catalytic (224-528)	1	20.9171	controllerType=0 controllerNumber=1 scan=4107	C14(Carbamidomethyl / 57.0215)	20231203_vapa_xj04_mlwiii147a_ethcd.ScanId;v=1;d1=4107.4107.3	ethcd	0	0	0	0	5.5e-06	5.6e-06	FTMS + c NSI d sa Full ms2 695.3418@etd54.85 695.3418@hcd20.00 [120.0000-2000.0000]
33 | 363	1	247	R.TGTFIVIDILIDIIR.E			2.7e-08	2.7e-08	7.57	674.4	611.6	611.6	3	568.01	568.01	0.43		1702.02	1702.01	Specific		>sp|SHP2Ca|SHP2 Catalytic (224-528)	1	28.7146	controllerType=0 controllerNumber=1 scan=5897		20231203_vapa_xj04_mlwiii147a_ethcd.ScanId;v=1;d1=5897.5897.3	ethcd	0	0	0	0	2.6e-09	2.7e-09	FTMS + c NSI d sa Full ms2 568.0110@etd54.85 568.0110@hcd20.00 [120.0000-1715.0000]
34 | 445	1	262	R.EKGVDC[+57.02146]DIDVPKTIQMVR.S			3.2e-05	3.3e-05	4.49	406.3	406.3	406.3	4	526.52	526.52	1.31		2103.06	2103.06	Specific		>sp|SHP2Ca|SHP2 Catalytic (224-528)	1	20.8688	controllerType=0 controllerNumber=1 scan=4094	C6(Carbamidomethyl / 57.0215)	20231203_vapa_xj04_mlwiii147a_ethcd.ScanId;v=1;d1=4094.4094.4	ethcd	0	0	0	0	6.9e-06	7e-06	FTMS + c NSI d sa Full ms2 526.7703@etd30.85 526.7703@hcd20.00 [120.0000-2000.0000]
35 | 100	1	262	R.EKGVDC[+57.02146]DIDVPK.T			1.5e-05	1.6e-05	4.81	470.9	470.9	470.9	2	687.833	687.832	1.21		1374.66	1374.66	Specific		>sp|SHP2Ca|SHP2 Catalytic (224-528)	1	18.5361	controllerType=0 controllerNumber=1 scan=3522	C6(Carbamidomethyl / 57.0215)	20231203_vapa_xj04_mlwiii147a_ethcd.ScanId;v=1;d1=3522.3522.2	ethcd	0	0	0	0	2.6e-06	2.6e-06	FTMS + c NSI d sa Full ms2 687.8322@etd123.41 687.8322@hcd20.00 [120.0000-1386.0000]
36 | 467	1	264	K.GVDC[+57.02146]DIDVPKTIQMVR.S			5.1e-05	5.2e-05	4.29	541.8	541.8	541.8	3	615.979	615.978	1.97		1845.92	1845.92	Specific		>sp|SHP2Ca|SHP2 Catalytic (224-528)	1	21.2264	controllerType=0 controllerNumber=1 scan=4172	C4(Carbamidomethyl / 57.0215)	20231203_vapa_xj04_mlwiii147a_ethcd.ScanId;v=1;d1=4172.4172.3	ethcd	0	0	0	0	1.1e-05	1.1e-05	FTMS + c NSI d sa Full ms2 615.9783@etd54.85 615.9783@hcd20.00 [120.0000-1858.0000]
37 | 166	1	264	K.GVDC[+57.02146]DIDVPK.T			5.1e-05	5.1e-05	4.3	428.6	405	405	2	559.263	559.263	-0.5		1117.52	1117.52	Specific		>sp|SHP2Ca|SHP2 Catalytic (224-528)	1	19.1606	controllerType=0 controllerNumber=1 scan=3667	C4(Carbamidomethyl / 57.0215)	20231203_vapa_xj04_mlwiii147a_ethcd.ScanId;v=1;d1=3667.3667.2	ethcd	0	0	0	0	1e-05	1.1e-05	FTMS + c NSI d sa Full ms2 559.2640@etd123.41 559.2640@hcd20.00 [120.0000-1129.0000]
38 | 80	1	283	R.SGMVQTEAQYR.F			2.3e-05	2.4e-05	4.63	439.4	407.1	407.1	2	635.299	635.298	1.21		1269.59	1269.59	Specific		>sp|SHP2Ca|SHP2 Catalytic (224-528)	1	18.2495	controllerType=0 controllerNumber=1 scan=3463		20231203_vapa_xj04_mlwiii147a_ethcd.ScanId;v=1;d1=3463.3463.2	ethcd	0	0	0	0	4.9e-06	4.9e-06	FTMS + c NSI d sa Full ms2 635.2984@etd123.41 635.2984@hcd20.00 [120.0000-1281.0000]
LYP, DML189, HCD
PID	Prot._x000D_ Rank	Pos.	Sequence_x000D_ (unformatted)	Mods_x000D_ (variable)	Glycans	PEP_x000D_ 2D	PEP_x000D_ 1D	|Log Prob|	Score	Delta_x000D_ Score	Delta Mod._x000D_ Score	z	Obs._x000D_ m/z	Calc._x000D_ m/z	ppm_x000D_ err.	Off-_x000D_ By-X	Obs._x000D_ MH	Calc._x000D_ MH	Cleavage	Glycans_x000D_ Pos.	Protein_x000D_ Name	Prot._x000D_ Id	Scan_x000D_ Time	Scan #	Mods_x000D_ (fixed)	Comment	Fragment_x000D_ Type	FDR_x000D_ 2D	FDR_x000D_ 1D	FDR uniq._x000D_ 2D	FDR uniq._x000D_ 1D	q-value_x000D_ 2D	q-value_x000D_ 1D	Scan info	MobilityValue
1 | 1094	1	267	R.TQRPSLVQTQEQYELVYNAVLELFKRQM[+15.99492].-	M28(Oxidation / 15.9949)		3.5e-14	4.2e-14	13.45	943.9	943.9	943.9	4	857.698	857.697	0.91		3427.77	3427.77	Specific		>sp|LYPCa|LYP Catalytic (1-294)	1	25.4226	controllerType=0 controllerNumber=1 scan=19146		20240605_bodo_mlh01_dmlv038_8.ScanId;v=1;d1=19146.19146.4	hcd	0	0	0	0	4.2e-15	4.9e-15	FTMS + c NSI d Full ms2 858.1998@hcd30.00 [120.0000-3524.7190]
2 | 1249	1	264	R.EM[+15.99492]RTQRPSLVQTQEQYELVYNAVLELFKR.Q	M2(Oxidation / 15.9949)		1e-07	1.2e-07	6.98	465	465	465	5	717.778	717.776	1.75		3584.86	3584.85	Specific		>sp|LYPCa|LYP Catalytic (1-294)	1	25.6607	controllerType=0 controllerNumber=1 scan=19292		20240605_bodo_mlh01_dmlv038_8.ScanId;v=1;d1=19292.19292.5	hcd	0	0	0	0	1.5e-08	1.8e-08	FTMS + c NSI d Full ms2 718.1792@hcd30.00 [120.0000-3686.7937]
3 | 896	1	234	R.TGVIC[+57.02146]AIDYTWM[+15.99492]LLK.D	M12(Oxidation / 15.9949)		1.2e-09	1.4e-09	8.94	669	669	669	2	900.459	900.457	2.1		1799.91	1799.91	Specific		>sp|LYPCa|LYP Catalytic (1-294)	1	25.9064	controllerType=0 controllerNumber=1 scan=19454	C5(Carbamidomethyl / 57.0215)	20240605_bodo_mlh01_dmlv038_8.ScanId;v=1;d1=19454.19454.2	hcd	0	0	0	0	6.9e-11	8.1e-11	FTMS + c NSI d Full ms2 900.4587@hcd30.00 [120.0000-1858.5679]
4 | 16	1	1	-.MDQR.E			5.7e-05	6.8e-05	4.24	397.7	397.7	397.7	1	549.246	549.245	2.07		549.246	549.245	Specific		>sp|LYPCa|LYP Catalytic (1-294)	1	14.9534	controllerType=0 controllerNumber=1 scan=8787		20240605_bodo_mlh01_dmlv038_8.ScanId;v=1;d1=8787.8787.2	hcd	0	0	0	0	2.1e-06	2.5e-06	FTMS + c NSI d Full ms2 549.2456@hcd30.00 [120.0000-1142.0931]
5 | 4	1	2	M.DQR.E			0.0017	0.002	2.77	336	336	336	1	418.205	418.204	1.52		418.205	418.204	NRagged		>sp|LYPCa|LYP Catalytic (1-294)	1	15.5065	controllerType=0 controllerNumber=1 scan=9323		20240605_bodo_mlh01_dmlv038_8.ScanId;v=1;d1=9323.9323.3	hcd	0	0	0	0	5.4e-05	6.4e-05	FTMS + c NSI d Full ms2 417.5591@hcd30.00 [120.0000-1300.1787]
6 | 266	1	10	K.FLDEAQSKK.I			1.4e-08	1.6e-08	7.86	607.9	460.1	460.1	2	533.283	533.282	0.5		1065.56	1065.56	Specific		>sp|LYPCa|LYP Catalytic (1-294)	1	16.3747	controllerType=0 controllerNumber=1 scan=10293		20240605_bodo_mlh01_dmlv038_8.ScanId;v=1;d1=10293.10293.2	hcd	0	0	0	0	9.9e-10	1.2e-09	FTMS + c NSI d Full ms2 533.2831@hcd30.00 [120.0000-1109.5294]
7 | 187	1	10	K.FLDEAQSK.K			0.0024	0.0028	2.63	432.1	302	302	2	469.737	469.235	0.46	1	938.466	937.462	Specific		>sp|LYPCa|LYP Catalytic (1-294)	1	18.4716	controllerType=0 controllerNumber=1 scan=12465		20240605_bodo_mlh01_dmlv038_8.ScanId;v=1;d1=12465.12465.2	hcd	0	0	0	0	9.6e-05	0.00011	FTMS + c NSI d Full ms2 469.7368@hcd30.00 [120.0000-979.8950]
8 | 867	1	18	K.KITKEEFANEFLK.L			1.5e-13	1.7e-13	12.83	881	787.1	787.1	2	798.937	798.935	1.7		1596.87	1596.86	Specific		>sp|LYPCa|LYP Catalytic (1-294)	1	20.3439	controllerType=0 controllerNumber=1 scan=14557		20240605_bodo_mlh01_dmlv038_8.ScanId;v=1;d1=14557.14557.2	hcd	0	0	0	0	1.4e-14	1.7e-14	FTMS + c NSI d Full ms2 798.9362@hcd30.00 [120.0000-1651.4619]
9 | 582	1	19	K.ITKEEFANEFLK.L			3.1e-10	3.7e-10	9.51	693.5	557.2	557.2	2	734.888	734.888	0.59		1468.77	1468.77	Specific		>sp|LYPCa|LYP Catalytic (1-294)	1	20.8326	controllerType=0 controllerNumber=1 scan=15082		20240605_bodo_mlh01_dmlv038_8.ScanId;v=1;d1=15082.15082.2	hcd	0	0	0	0	2.8e-11	3.3e-11	FTMS + c NSI d Full ms2 734.8885@hcd30.00 [120.0000-1520.8046]
10 | 337	1	22	K.EEFANEFLK.L			6.6e-08	7.9e-08	7.18	462.6	462.6	462.6	2	563.775	563.774	1.55		1126.54	1126.54	Specific		>sp|LYPCa|LYP Catalytic (1-294)	1	21.1381	controllerType=0 controllerNumber=1 scan=15449		20240605_bodo_mlh01_dmlv038_8.ScanId;v=1;d1=15449.15449.4	hcd	0	0	0	0	8.4e-09	9.9e-09	FTMS + c NSI d Full ms2 563.2701@hcd30.00 [120.0000-2321.4060]
11 | 743	1	38	K.YKADKTYPTTVAEKPK.N			1.4e-15	1.6e-15	14.87	968.6	968.6	968.6	3	614	614	0.19		1839.99	1839.99	Specific		>sp|LYPCa|LYP Catalytic (1-294)	1	15.6359	controllerType=0 controllerNumber=1 scan=9465		20240605_bodo_mlh01_dmlv038_8.ScanId;v=1;d1=9465.9465.3	hcd	0	0	0	0	2.1e-16	2.5e-16	FTMS + c NSI d Full ms2 614.3369@hcd30.00 [120.0000-1902.3190]
12 | 391	1	40	K.ADKTYPTTVAEKPK.N			7.3e-12	8.6e-12	11.14	891.1	739.2	739.2	2	774.917	774.917	-0.3		1548.83	1548.83	Specific		>sp|LYPCa|LYP Catalytic (1-294)	1	15.6194	controllerType=0 controllerNumber=1 scan=9447		20240605_bodo_mlh01_dmlv038_8.ScanId;v=1;d1=9447.9447.2	hcd	0	0	0	0	1.1e-12	1.3e-12	FTMS + c NSI d Full ms2 774.9169@hcd30.00 [120.0000-1602.4625]
13 | 733	1	43	K.TYPTTVAEKPKNIKK.N			4.2e-07	5e-07	6.38	539.4	410.7	410.7	3	573.335	573.333	2.85		1717.99	1717.98	Specific		>sp|LYPCa|LYP Catalytic (1-294)	1	15.5924	controllerType=0 controllerNumber=1 scan=9417		20240605_bodo_mlh01_dmlv038_8.ScanId;v=1;d1=9417.9417.3	hcd	0	0	0	0	6.1e-08	7.3e-08	FTMS + c NSI d Full ms2 573.3340@hcd30.00 [120.0000-1776.8501]
14 | 474	1	43	K.TYPTTVAEKPKNIK.K			1.7e-11	2e-11	10.77	650.6	532.9	532.9	3	530.636	530.635	1.73		1589.89	1589.89	Specific		>sp|LYPCa|LYP Catalytic (1-294)	1	16.2566	controllerType=0 controllerNumber=1 scan=10168		20240605_bodo_mlh01_dmlv038_8.ScanId;v=1;d1=10168.10168.3	hcd	0	0	0	0	1.7e-12	2e-12	FTMS + c NSI d Full ms2 530.9703@hcd30.00 [120.0000-1647.2172]
15 | 281	1	43	K.TYPTTVAEKPK.N			6.7e-08	7.9e-08	7.17	516	447.5	447.5	2	617.839	617.837	2.17		1234.67	1234.67	Specific		>sp|LYPCa|LYP Catalytic (1-294)	1	17.0039	controllerType=0 controllerNumber=1 scan=10940		20240605_bodo_mlh01_dmlv038_8.ScanId;v=1;d1=10940.10940.2	hcd	0	0	0	0	8.7e-09	1e-08	FTMS + c NSI d Full ms2 617.3011@hcd30.00 [120.0000-1280.9263]
16 | 1240	1	60	R.YKDILPYDYSRVELSLITSDEDSSYINANFIK.G			1.7e-15	2.1e-15	14.76	976.8	976.8	976.8	4	943.723	943.721	2.1		3771.87	3771.86	Specific		>sp|LYPCa|LYP Catalytic (1-294)	1	23.5592	controllerType=0 controllerNumber=1 scan=17874		20240605_bodo_mlh01_dmlv038_8.ScanId;v=1;d1=17874.17874.4	hcd	0	0	0	0	3e-16	3.6e-16	FTMS + c NSI d Full ms2 944.2250@hcd30.00 [120.0000-3875.7021]
17 | 528	1	60	R.YKDILPYDYSR.V			2.3e-10	2.7e-10	9.64	646	646	646	2	716.86	716.859	1.39		1432.71	1432.71	Specific		>sp|LYPCa|LYP Catalytic (1-294)	1	19.9145	controllerType=0 controllerNumber=1 scan=14066		20240605_bodo_mlh01_dmlv038_8.ScanId;v=1;d1=14066.14066.2	hcd	0	0	0	0	2.3e-11	2.7e-11	FTMS + c NSI d Full ms2 716.8608@hcd30.00 [120.0000-1484.0280]
18 | 329	1	62	K.DILPYDYSR.V			9.3e-07	1.1e-06	6.03	419.1	419.1	419.1	2	571.281	571.28	1.92		1141.55	1141.55	Specific		>sp|LYPCa|LYP Catalytic (1-294)	1	19.9991	controllerType=0 controllerNumber=1 scan=14161		20240605_bodo_mlh01_dmlv038_8.ScanId;v=1;d1=14161.14161.2	hcd	0	0	0	0	1.3e-07	1.6e-07	FTMS + c NSI d Full ms2 571.2808@hcd30.00 [120.0000-1187.0448]
19 | 1007	1	71	R.VELSLITSDEDSSYINANFIKGVYGPK.A			1.1e-19	1.3e-19	18.98	1191.7	1191.7	1191.7	3	987.171	987.169	1.97		2959.5	2959.49	Specific		>sp|LYPCa|LYP Catalytic (1-294)	1	22.8492	controllerType=0 controllerNumber=1 scan=17302		20240605_bodo_mlh01_dmlv038_8.ScanId;v=1;d1=17302.17302.3	hcd	0	0	0	0	3.9e-20	4.6e-20	FTMS + c NSI d Full ms2 987.8391@hcd30.00 [120.0000-3045.2356]
20 | 941	1	71	R.VELSLITSDEDSSYINANFIK.G			3.4e-11	4e-11	10.47	825.1	825.1	825.1	3	786.73	786.729	2.31		2358.18	2358.17	Specific		>sp|LYPCa|LYP Catalytic (1-294)	1	22.9204	controllerType=0 controllerNumber=1 scan=17365		20240605_bodo_mlh01_dmlv038_8.ScanId;v=1;d1=17365.17365.3	hcd	0	0	0	0	3.6e-12	4.2e-12	FTMS + c NSI d Full ms2 786.7311@hcd30.00 [120.0000-2429.8452]
21 | 958	1	98	K.AYIATQGPLSTTLLDFWR.M			4e-13	4.7e-13	12.4	817.1	817.1	817.1	2	1027.04	1027.04	1.44		2053.08	2053.08	Specific		>sp|LYPCa|LYP Catalytic (1-294)	1	25.5346	controllerType=0 controllerNumber=1 scan=19207		20240605_bodo_mlh01_dmlv038_8.ScanId;v=1;d1=19207.19207.2	hcd	0	0	0	0	3.7e-14	4.4e-14	FTMS + c NSI d Full ms2 1027.5428@hcd30.00 [120.0000-2117.8193]
22 | 1012	1	142	R.YWAEPGEMQLEFGPFSVSC[+57.02146]EAEKRK.S			7e-17	8.3e-17	16.16	1024.9	1024.9	1024.9	4	744.6	744.598	2.25		2975.38	2975.37	Specific		>sp|LYPCa|LYP Catalytic (1-294)	1	22.934	controllerType=0 controllerNumber=1 scan=17376	C19(Carbamidomethyl / 57.0215)	20240605_bodo_mlh01_dmlv038_8.ScanId;v=1;d1=17376.17376.4	hcd	0	0	0	0	1.8e-17	2.1e-17	FTMS + c NSI d Full ms2 744.8501@hcd30.00 [120.0000-3062.2524]
23 | 1024	1	142	R.YWAEPGEMQLEFGPFSVSC[+57.02146]EAEKR.K			2.9e-18	3.4e-18	17.54	1063.4	1050.8	1050.8	3	949.764	949.763	1.28		2847.28	2847.28	Specific		>sp|LYPCa|LYP Catalytic (1-294)	1	23.2937	controllerType=0 controllerNumber=1 scan=17685	C19(Carbamidomethyl / 57.0215)	20240605_bodo_mlh01_dmlv038_8.ScanId;v=1;d1=17685.17685.3	hcd	0	0	0	0	5.5e-19	6.5e-19	FTMS + c NSI d Full ms2 950.0988@hcd30.00 [120.0000-2929.7505]
24 | 1044	1	142	R.YWAEPGEMQLEFGPFSVSC[+57.02146]EAEK.R			5.8e-17	6.8e-17	16.24	1018.3	1018.3	1018.3	2	1346.09	1346.09	1.56		2691.18	2691.17	Specific		>sp|LYPCa|LYP Catalytic (1-294)	1	23.705	controllerType=0 controllerNumber=1 scan=18003	C19(Carbamidomethyl / 57.0215)	20240605_bodo_mlh01_dmlv038_8.ScanId;v=1;d1=18003.18003.2	hcd	0	0	0	0	1.6e-17	1.9e-17	FTMS + c NSI d Full ms2 1346.5931@hcd30.00 [120.0000-2768.6821]
25 | 149	1	165	K.RKSDYIIR.T			7.3e-06	8.6e-06	5.14	497.3	497.3	497.3	2	525.808	525.806	2.62		1050.61	1050.61	Specific		>sp|LYPCa|LYP Catalytic (1-294)	1	16.7409	controllerType=0 controllerNumber=1 scan=10662		20240605_bodo_mlh01_dmlv038_8.ScanId;v=1;d1=10662.10662.2	hcd	0	0	0	0	4.8e-07	5.7e-07	FTMS + c NSI d Full ms2 525.8076@hcd30.00 [120.0000-1094.2794]
26 | 308	1	166	R.KSDYIIRTLK.V			2.5e-06	3e-06	5.59	500.4	500.4	500.4	2	618.87	618.869	2.23		1236.73	1236.73	Specific		>sp|LYPCa|LYP Catalytic (1-294)	1	18.5092	controllerType=0 controllerNumber=1 scan=12511		20240605_bodo_mlh01_dmlv038_8.ScanId;v=1;d1=12511.12511.2	hcd	0	0	0	0	2.2e-07	2.6e-07	FTMS + c NSI d Full ms2 618.8699@hcd30.00 [120.0000-1284.1266]
27 | 167	1	166	R.KSDYIIR.T			0.00015	0.00018	3.83	440.1	311.3	311.3	2	447.756	447.756	1.2		894.505	894.504	Specific		>sp|LYPCa|LYP Catalytic (1-294)	1	17.3393	controllerType=0 controllerNumber=1 scan=11268		20240605_bodo_mlh01_dmlv038_8.ScanId;v=1;d1=11268.11268.3	hcd	0	0	0	0	5.8e-06	6.8e-06	FTMS + c NSI d Full ms2 448.5906@hcd30.00 [120.0000-1395.1353]
28 | 320	1	167	K.SDYIIRTLK.V			2.3e-12	2.7e-12	11.64	730.1	495.1	495.1	2	554.823	554.822	2.38		1108.64	1108.64	Specific		>sp|LYPCa|LYP Catalytic (1-294)	1	19.303	controllerType=0 controllerNumber=1 scan=13406		20240605_bodo_mlh01_dmlv038_8.ScanId;v=1;d1=13406.13406.2	hcd	0	0	0	0	2e-13	2.4e-13	FTMS + c NSI d Full ms2 554.8229@hcd30.00 [120.0000-1153.4707]
29 | 496	1	173	R.TLKVKFNSETR.T			2.6e-07	3.1e-07	6.58	516.3	506.1	506.1	3	441.587	441.586	2.52		1322.75	1322.74	Specific		>sp|LYPCa|LYP Catalytic (1-294)	1	17.335	controllerType=0 controllerNumber=1 scan=11261		20240605_bodo_mlh01_dmlv038_8.ScanId;v=1;d1=11261.11261.3	hcd	0	0	0	0	3e-08	3.6e-08	FTMS + c NSI d Full ms2 441.5869@hcd30.00 [120.0000-1373.7039]
30 | 920	1	176	K.VKFNSETRTIYQFHYK.N			6.7e-07	8e-07	6.17	481.2	422.4	422.4	4	516.02	516.019	1.62		2061.06	2061.06	Specific		>sp|LYPCa|LYP Catalytic (1-294)	1	19.502	controllerType=0 controllerNumber=1 scan=13623		20240605_bodo_mlh01_dmlv038_8.ScanId;v=1;d1=13623.13623.4	hcd	0	0	0	0	9.6e-08	1.1e-07	FTMS + c NSI d Full ms2 516.2709@hcd30.00 [120.0000-2129.6494]
31 | 126	1	176	K.VKFNSETR.T			4.7e-07	5.6e-07	6.33	443.3	443.3	443.3	2	490.762	490.762	1.31		980.517	980.516	Specific		>sp|LYPCa|LYP Catalytic (1-294)	1	15.745	controllerType=0 controllerNumber=1 scan=9585		20240605_bodo_mlh01_dmlv038_8.ScanId;v=1;d1=9585.9585.2	hcd	0	0	0	0	6.3e-08	7.5e-08	FTMS + c NSI d Full ms2 490.7188@hcd30.00 [120.0000-1022.6984]
32 | 1258	1	184	R.TIYQFHYKNWPDHDVPSSIDPILELIWDVR.C			1.7e-07	2e-07	6.78	437.5	437.5	437.5	4	924.97	924.968	3.08		3696.86	3696.85	Specific		>sp|LYPCa|LYP Catalytic (1-294)	1	26.5164	controllerType=0 controllerNumber=1 scan=19798		20240605_bodo_mlh01_dmlv038_8.ScanId;v=1;d1=19798.19798.4	hcd	0	0	0	0	2.3e-08	2.7e-08	FTMS + c NSI d Full ms2 925.4706@hcd30.00 [120.0000-3799.1843]
33 | 310	1	184	R.TIYQFHYK.N			8.2e-06	9.7e-06	5.09	487.3	487.3	487.3	2	550.282	550.282	0.17		1099.56	1099.56	Specific		>sp|LYPCa|LYP Catalytic (1-294)	1	18.8988	controllerType=0 controllerNumber=1 scan=12957		20240605_bodo_mlh01_dmlv038_8.ScanId;v=1;d1=12957.12957.3	hcd	0	0	0	0	5.1e-07	6.1e-07	FTMS + c NSI d Full ms2 550.9479@hcd30.00 [120.0000-1708.3485]
34 | 1154	1	192	K.NWPDHDVPSSIDPILELIWDVR.C			5.8e-12	6.8e-12	11.24	769.5	769.5	769.5	3	872.776	872.775	1.77		2616.31	2616.31	Specific		>sp|LYPCa|LYP Catalytic (1-294)	1	26.8009	controllerType=0 controllerNumber=1 scan=19955		20240605_bodo_mlh01_dmlv038_8.ScanId;v=1;d1=19955.19955.3	hcd	0	0	0	0	9.7e-13	1.2e-12	FTMS + c NSI d Full ms2 873.1110@hcd30.00 [120.0000-2694.1677]
35 | 1163	1	234	R.TGVIC[+57.02146]AIDYTWMLLKDGIIPENFSVFSLIR.E			9.6e-21	1.1e-20	20.02	1197.1	1197.1	1197.1	3	1157.94	1157.94	1.36		3471.81	3471.81	Specific		>sp|LYPCa|LYP Catalytic (1-294)	1	27.6593	controllerType=0 controllerNumber=1 scan=20442	C5(Carbamidomethyl / 57.0215)	20240605_bodo_mlh01_dmlv038_8.ScanId;v=1;d1=20442.20442.3	hcd	0	0	0	0	6.1e-21	7.2e-21	FTMS + c NSI d Full ms2 1158.6105@hcd30.00 [120.0000-3567.7959]
36 | 897	1	234	R.TGVIC[+57.02146]AIDYTWMLLK.D			2.6e-10	3e-10	9.59	652.4	652.4	652.4	2	892.46	892.46	0.43		1783.91	1783.91	Specific		>sp|LYPCa|LYP Catalytic (1-294)	1	26.1206	controllerType=0 controllerNumber=1 scan=19575	C5(Carbamidomethyl / 57.0215)	20240605_bodo_mlh01_dmlv038_8.ScanId;v=1;d1=19575.19575.2	hcd	0	0	0	0	2.5e-11	2.9e-11	FTMS + c NSI d Full ms2 892.4608@hcd30.00 [120.0000-1842.2520]
37 | 968	1	249	K.DGIIPENFSVFSLIREMR.T			1.1e-08	1.3e-08	7.96	587.8	587.8	587.8	3	708.371	708.37	1.01		2123.1	2123.1	Specific		>sp|LYPCa|LYP Catalytic (1-294)	1	25.7868	controllerType=0 controllerNumber=1 scan=19382		20240605_bodo_mlh01_dmlv038_8.ScanId;v=1;d1=19382.19382.3	hcd	0	0	0	0	7.2e-10	8.5e-10	FTMS + c NSI d Full ms2 708.7055@hcd30.00 [120.0000-2191.0869]
38 | 888	1	249	K.DGIIPENFSVFSLIR.E			7.4e-08	8.8e-08	7.13	530.3	530.3	530.3	2	853.96	853.959	1.06		1706.91	1706.91	Specific		>sp|LYPCa|LYP Catalytic (1-294)	1	25.3545	controllerType=0 controllerNumber=1 scan=19092		20240605_bodo_mlh01_dmlv038_8.ScanId;v=1;d1=19092.19092.2	hcd	0	0	0	0	1.1e-08	1.3e-08	FTMS + c NSI d Full ms2 854.4619@hcd30.00 [120.0000-1764.7341]
39 | 1251	1	264	R.EMRTQRPSLVQTQEQYELVYNAVLELFKR.Q			1.7e-14	2.1e-14	13.76	867.7	867.7	867.7	5	714.579	714.577	2.03		3568.87	3568.86	Specific		>sp|LYPCa|LYP Catalytic (1-294)	1	25.7423	controllerType=0 controllerNumber=1 scan=19350		20240605_bodo_mlh01_dmlv038_8.ScanId;v=1;d1=19350.19350.5	hcd	0	0	0	0	1.3e-15	1.5e-15	FTMS + c NSI d Full ms2 714.7792@hcd30.00 [120.0000-3669.4536]
40 | 1123	1	267	R.TQRPSLVQTQEQYELVYNAVLELFKRQM.-			2e-18	2.3e-18	17.71	1128.3	1128.3	1128.3	3	1137.93	1137.93	1.67		3411.78	3411.77	Specific		>sp|LYPCa|LYP Catalytic (1-294)	1	26.1308	controllerType=0 controllerNumber=1 scan=19583		20240605_bodo_mlh01_dmlv038_8.ScanId;v=1;d1=19583.19583.3	hcd	0	0	0	0	3.1e-19	3.7e-19	FTMS + c NSI d Full ms2 1138.2638@hcd30.00 [120.0000-3505.5352]
41 | 1113	1	267	R.TQRPSLVQTQEQYELVYNAVLELFKR.Q			1.9e-19	2.2e-19	18.73	1165.4	1165.4	1165.4	3	1051.56	1051.56	0.66		3152.68	3152.67	Specific		>sp|LYPCa|LYP Catalytic (1-294)	1	26.009	controllerType=0 controllerNumber=1 scan=19515		20240605_bodo_mlh01_dmlv038_8.ScanId;v=1;d1=19515.19515.3	hcd	0	0	0	0	6.9e-20	8.2e-20	FTMS + c NSI d Full ms2 1051.8970@hcd30.00 [120.0000-3241.2529]
42 | 1134	1	267	R.TQRPSLVQTQEQYELVYNAVLELFK.R			4.8e-15	5.7e-15	14.32	978.4	978.4	978.4	3	999.529	999.529	-0.02		2996.57	2996.57	Specific		>sp|LYPCa|LYP Catalytic (1-294)	1	26.5732	controllerType=0 controllerNumber=1 scan=19827		20240605_bodo_mlh01_dmlv038_8.ScanId;v=1;d1=19827.19827.3	hcd	0	0	0	0	5.2e-16	6.2e-16	FTMS + c NSI d Full ms2 1000.1996@hcd30.00 [120.0000-3083.0588]
43 | 1151	1	270	R.PSLVQTQEQYELVYNAVLELFKRQM.-			1.3e-06	1.5e-06	5.88	406.2	406.2	406.2	3	1009.53	1009.53	0.78		3026.57	3026.57	Specific		>sp|LYPCa|LYP Catalytic (1-294)	1	26.7445	controllerType=0 controllerNumber=1 scan=19922		20240605_bodo_mlh01_dmlv038_8.ScanId;v=1;d1=19922.19922.3	hcd	0	0	0	0	1.6e-07	1.9e-07	FTMS + c NSI d Full ms2 1009.8593@hcd30.00 [120.0000-3112.6177]
44 | 1141	1	270	R.PSLVQTQEQYELVYNAVLELFKR.Q			1.6e-21	1.9e-21	20.8	1227.4	1227.4	1227.4	3	923.163	923.16	2.46		2767.47	2767.47	Specific		>sp|LYPCa|LYP Catalytic (1-294)	1	26.6406	controllerType=0 controllerNumber=1 scan=19864		20240605_bodo_mlh01_dmlv038_8.ScanId;v=1;d1=19864.19864.3	hcd	0	0	0	0	1.6e-21	1.9e-21	FTMS + c NSI d Full ms2 923.8293@hcd30.00 [120.0000-2849.3657]
PTP1B, DML189, HCD
PID	Prot._x000D_ Rank	Pos.	Sequence_x000D_ (unformatted)	Mods_x000D_ (variable)	Glycans	PEP_x000D_ 2D	PEP_x000D_ 1D	|Log Prob|	Score	Delta_x000D_ Score	Delta Mod._x000D_ Score	z	Obs._x000D_ m/z	Calc._x000D_ m/z	ppm_x000D_ err.	Off-_x000D_ By-X	Obs._x000D_ MH	Calc._x000D_ MH	Cleavage	Glycans_x000D_ Pos.	Protein_x000D_ Name	Prot._x000D_ Id	Scan_x000D_ Time	Scan #	Mods_x000D_ (fixed)	Comment	Fragment_x000D_ Type	FDR_x000D_ 2D	FDR_x000D_ 1D	FDR uniq._x000D_ 2D	FDR uniq._x000D_ 1D	q-value_x000D_ 2D	q-value_x000D_ 1D	Scan info	MobilityValue
1 | 1017	1	46	R.Y[+320.01030]RDVSPFDHSR.I	Y1(DML189 / 320.0103)		3.1e-10	4.2e-10	9.51	706	611.2	611.2	3	566.893	566.892	3.19		1698.67	1698.66	Specific		>sp|P18031|PTN1_HUMAN Tyrosine-protein phosphatase non-receptor type 1 OS=Homo sapiens OX=9606 GN=PTPN1 PE=1 SV=1	1	21.2844	controllerType=0 controllerNumber=1 scan=12066		20240605_bodo_mlh01_dmlv038_10.ScanId;v=1;d1=12066.12066.3	hcd	0	0	0	0	2.2e-11	3e-11	FTMS + c NSI d Full ms2 567.2276@hcd30.00 [120.0000-1758.1646]
2 | 602	1	46	R.YRDVSPFDHSRIK.L			6.9e-06	9.4e-06	5.16	435.9	435.9	435.9	4	405.714	405.713	1.97		1619.83	1619.83	Specific		>sp|P18031|PTN1_HUMAN Tyrosine-protein phosphatase non-receptor type 1 OS=Homo sapiens OX=9606 GN=PTPN1 PE=1 SV=1	1	18.055	controllerType=0 controllerNumber=1 scan=8787		20240605_bodo_mlh01_dmlv038_10.ScanId;v=1;d1=8787.8787.4	hcd	0	0	0	0	4.7e-07	6.4e-07	FTMS + c NSI d Full ms2 405.7138@hcd30.00 [120.0000-1678.5764]
3 | 566	1	46	R.YRDVSPFDHSR.I			2.4e-10	3.3e-10	9.61	756.9	501.6	501.6	2	689.83	689.829	1.5		1378.65	1378.65	Specific		>sp|P18031|PTN1_HUMAN Tyrosine-protein phosphatase non-receptor type 1 OS=Homo sapiens OX=9606 GN=PTPN1 PE=1 SV=1	1	17.6054	controllerType=0 controllerNumber=1 scan=8329		20240605_bodo_mlh01_dmlv038_10.ScanId;v=1;d1=8329.8329.2	hcd	0	0	0	0	1.7e-11	2.4e-11	FTMS + c NSI d Full ms2 689.8300@hcd30.00 [120.0000-1428.8851]
4 | 484	1	374	R.VVGGSLRGAQAASPAK.G			5.9e-07	8.1e-07	6.23	591.6	591.6	591.6	2	734.916	734.915	0.99		1468.82	1468.82	Specific		>sp|P18031|PTN1_HUMAN Tyrosine-protein phosphatase non-receptor type 1 OS=Homo sapiens OX=9606 GN=PTPN1 PE=1 SV=1	1	16.3567	controllerType=0 controllerNumber=1 scan=7091		20240605_bodo_mlh01_dmlv038_10.ScanId;v=1;d1=7091.7091.2	hcd	0	0	0	0	6.4e-08	8.7e-08	FTMS + c NSI d Full ms2 734.9147@hcd30.00 [120.0000-1520.8579]
5 | 82	1	113	R.VM[+15.99492]EKGSLK.C	M2(Oxidation / 15.9949)		4.5e-05	6.2e-05	4.35	503	405.4	405.4	2	454.25	454.25	1.36		907.493	907.492	Specific		>sp|P18031|PTN1_HUMAN Tyrosine-protein phosphatase non-receptor type 1 OS=Homo sapiens OX=9606 GN=PTPN1 PE=1 SV=1	1	14.9564	controllerType=0 controllerNumber=1 scan=5659		20240605_bodo_mlh01_dmlv038_10.ScanId;v=1;d1=5659.5659.2	hcd	0	0	0	0	2.6e-06	3.6e-06	FTMS + c NSI d Full ms2 454.2509@hcd30.00 [120.0000-948.3038]
6 | 143	1	113	R.VMEKGSLK.C			4.2e-05	5.8e-05	4.38	442.5	442.5	442.5	2	446.253	446.252	1.71		891.498	891.497	Specific		>sp|P18031|PTN1_HUMAN Tyrosine-protein phosphatase non-receptor type 1 OS=Homo sapiens OX=9606 GN=PTPN1 PE=1 SV=1	1	15.4883	controllerType=0 controllerNumber=1 scan=6174		20240605_bodo_mlh01_dmlv038_10.ScanId;v=1;d1=6174.6174.2	hcd	0	0	0	0	2.2e-06	3e-06	FTMS + c NSI d Full ms2 446.1895@hcd30.00 [120.0000-931.8585]
7 | 898	1	372	R.SRVVGGSLRGAQAASPAK.G			0.0027	0.0037	2.57	312	312	312	3	571.322	571.324	-1.9		1711.95	1711.96	Specific		>sp|P18031|PTN1_HUMAN Tyrosine-protein phosphatase non-receptor type 1 OS=Homo sapiens OX=9606 GN=PTPN1 PE=1 SV=1	1	16.2511	controllerType=0 controllerNumber=1 scan=6984		20240605_bodo_mlh01_dmlv038_10.ScanId;v=1;d1=6984.6984.3	hcd	0	0	0	0	0.00011	0.00016	FTMS + c NSI d Full ms2 571.6602@hcd30.00 [120.0000-1771.7281]
8 | 255	1	372	R.SRVVGGSLR.G			3.8e-05	5.2e-05	4.42	538	381.9	381.9	2	465.778	465.778	1.6		930.549	930.548	Specific		>sp|P18031|PTN1_HUMAN Tyrosine-protein phosphatase non-receptor type 1 OS=Homo sapiens OX=9606 GN=PTPN1 PE=1 SV=1	1	16.6379	controllerType=0 controllerNumber=1 scan=7378		20240605_bodo_mlh01_dmlv038_10.ScanId;v=1;d1=7378.7378.2	hcd	0	0	0	0	1.9e-06	2.6e-06	FTMS + c NSI d Full ms2 465.7729@hcd30.00 [120.0000-971.8088]
9 | 1033	1	222	R.SGTFC[+57.02146]LADTC[+57.02146]LLLM[+15.99492]DKR.K	M14(Oxidation / 15.9949)		2.8e-09	3.8e-09	8.56	601.6	601.6	601.6	3	672.992	672.99	3.63		2016.96	2016.96	Specific		>sp|P18031|PTN1_HUMAN Tyrosine-protein phosphatase non-receptor type 1 OS=Homo sapiens OX=9606 GN=PTPN1 PE=1 SV=1	1	22.0998	controllerType=0 controllerNumber=1 scan=12891	C5(Carbamidomethyl / 57.0215); C10(Carbamidomethyl / 57.0215)	20240605_bodo_mlh01_dmlv038_10.ScanId;v=1;d1=12891.12891.3	hcd	0	0	0	0	2.3e-10	3.2e-10	FTMS + c NSI d Full ms2 672.8390@hcd30.00 [120.0000-2081.3354]
10 | 1042	1	222	R.SGTFC[+57.02146]LADTC[+57.02146]LLLM[+15.99492]DK.R	M14(Oxidation / 15.9949)		2.7e-09	3.7e-09	8.57	608.5	608.5	608.5	2	930.932	930.931	1.64		1860.86	1860.85	Specific		>sp|P18031|PTN1_HUMAN Tyrosine-protein phosphatase non-receptor type 1 OS=Homo sapiens OX=9606 GN=PTPN1 PE=1 SV=1	1	22.5762	controllerType=0 controllerNumber=1 scan=13324	C5(Carbamidomethyl / 57.0215); C10(Carbamidomethyl / 57.0215)	20240605_bodo_mlh01_dmlv038_10.ScanId;v=1;d1=13324.13324.2	hcd	0	0	0	0	2.2e-10	3e-10	FTMS + c NSI d Full ms2 930.9329@hcd30.00 [120.0000-1920.7351]
11 | 1354	1	222	R.SGTFC[+57.02146]LADTC[+57.02146]LLLMDKRK.D			3.7e-15	5e-15	14.44	936.7	936.7	936.7	4	533.021	533.019	3.78		2129.06	2129.06	Specific		>sp|P18031|PTN1_HUMAN Tyrosine-protein phosphatase non-receptor type 1 OS=Homo sapiens OX=9606 GN=PTPN1 PE=1 SV=1	1	22.1348	controllerType=0 controllerNumber=1 scan=12920	C5(Carbamidomethyl / 57.0215); C10(Carbamidomethyl / 57.0215)	20240605_bodo_mlh01_dmlv038_10.ScanId;v=1;d1=12920.12920.4	hcd	0	0	0	0	6e-16	8.3e-16	FTMS + c NSI d Full ms2 533.2718@hcd30.00 [120.0000-2199.0129]
12 | 1052	1	222	R.SGTFC[+57.02146]LADTC[+57.02146]LLLMDKR.K			2.4e-17	3.3e-17	16.62	1001	897.9	897.9	2	1000.98	1000.98	0.37		2000.96	2000.96	Specific		>sp|P18031|PTN1_HUMAN Tyrosine-protein phosphatase non-receptor type 1 OS=Homo sapiens OX=9606 GN=PTPN1 PE=1 SV=1	1	22.6757	controllerType=0 controllerNumber=1 scan=13427	C5(Carbamidomethyl / 57.0215); C10(Carbamidomethyl / 57.0215)	20240605_bodo_mlh01_dmlv038_10.ScanId;v=1;d1=13427.13427.2	hcd	0	0	0	0	3e-18	4.1e-18	FTMS + c NSI d Full ms2 1000.9847@hcd30.00 [120.0000-2063.6406]
13 | 1065	1	222	R.SGTFC[+57.02146]LADTC[+57.02146]LLLMDK.R			2.7e-12	3.7e-12	11.57	799.4	799.4	799.4	2	922.933	922.933	0.17		1844.86	1844.86	Specific		>sp|P18031|PTN1_HUMAN Tyrosine-protein phosphatase non-receptor type 1 OS=Homo sapiens OX=9606 GN=PTPN1 PE=1 SV=1	1	23.2917	controllerType=0 controllerNumber=1 scan=13923	C5(Carbamidomethyl / 57.0215); C10(Carbamidomethyl / 57.0215)	20240605_bodo_mlh01_dmlv038_10.ScanId;v=1;d1=13923.13923.2	hcd	0	0	0	0	2.4e-13	3.3e-13	FTMS + c NSI d Full ms2 922.9348@hcd30.00 [120.0000-1904.4188]
14 | 2103	1	157	R.QLELENLTTQETREILHFHYTTWPDFGVPESPASFLNFLFK.V			4.1e-12	5.6e-12	11.39	844	844	844	5	979.894	979.893	0.6		4895.44	4895.44	Specific		>sp|P18031|PTN1_HUMAN Tyrosine-protein phosphatase non-receptor type 1 OS=Homo sapiens OX=9606 GN=PTPN1 PE=1 SV=1	1	27.0403	controllerType=0 controllerNumber=1 scan=16093		20240605_bodo_mlh01_dmlv038_10.ScanId;v=1;d1=16093.16093.5	hcd	0	0	0	0	4.2e-13	5.7e-13	FTMS + c NSI d Full ms2 980.4950@hcd30.00 [120.0000-5024.6045]
15 | 738	1	157	R.QLELENLTTQETR.E			2.2e-10	3.1e-10	9.65	696.2	696.2	696.2	2	787.905	787.905	0.86		1574.8	1574.8	Specific		>sp|P18031|PTN1_HUMAN Tyrosine-protein phosphatase non-receptor type 1 OS=Homo sapiens OX=9606 GN=PTPN1 PE=1 SV=1	1	20.2826	controllerType=0 controllerNumber=1 scan=11047		20240605_bodo_mlh01_dmlv038_10.ScanId;v=1;d1=11047.11047.2	hcd	0	0	0	0	1.3e-11	1.7e-11	FTMS + c NSI d Full ms2 787.9055@hcd30.00 [120.0000-1628.9592]
16 | 532	1	44	R.NRYRDVSPFDHSR.I			8e-08	1.1e-07	7.09	636	497.4	497.4	3	550.271	550.269	2.76		1648.8	1648.79	Specific		>sp|P18031|PTN1_HUMAN Tyrosine-protein phosphatase non-receptor type 1 OS=Homo sapiens OX=9606 GN=PTPN1 PE=1 SV=1	1	17.4379	controllerType=0 controllerNumber=1 scan=8158		20240605_bodo_mlh01_dmlv038_10.ScanId;v=1;d1=8158.8158.3	hcd	0	0	0	0	3.9e-09	5.4e-09	FTMS + c NSI d Full ms2 550.2710@hcd30.00 [120.0000-1706.2772]
17 | 1421	1	258	R.M[+15.99492]GLIQTADQLRFSYLAVIEGAK.F	M1(Oxidation / 15.9949)		1.3e-11	1.8e-11	10.89	741.4	741.4	741.4	3	814.103	814.102	1.85		2440.3	2440.29	Specific		>sp|P18031|PTN1_HUMAN Tyrosine-protein phosphatase non-receptor type 1 OS=Homo sapiens OX=9606 GN=PTPN1 PE=1 SV=1	1	24.5309	controllerType=0 controllerNumber=1 scan=14736		20240605_bodo_mlh01_dmlv038_10.ScanId;v=1;d1=14736.14736.3	hcd	0	0	0	0	8.3e-13	1.1e-12	FTMS + c NSI d Full ms2 814.1025@hcd30.00 [120.0000-2513.6016]
18 | 358	1	258	R.M[+15.99492]GLIQTADQLR.F	M1(Oxidation / 15.9949)		2e-08	2.8e-08	7.69	630.1	630.1	630.1	2	631.333	631.332	2.14		1261.66	1261.66	Specific		>sp|P18031|PTN1_HUMAN Tyrosine-protein phosphatase non-receptor type 1 OS=Homo sapiens OX=9606 GN=PTPN1 PE=1 SV=1	1	19.7724	controllerType=0 controllerNumber=1 scan=10504		20240605_bodo_mlh01_dmlv038_10.ScanId;v=1;d1=10504.10504.2	hcd	0	0	0	0	9.3e-10	1.3e-09	FTMS + c NSI d Full ms2 631.3333@hcd30.00 [120.0000-1309.5519]
19 | 2110	1	258	R.MGLIQTADQLRFSYLAVIEGAKFIMGDSSVQDQWK.E			2.8e-21	3.8e-21	20.55	1215	1215	1215	4	987.254	987.252	1.76		3945.99	3945.99	Specific		>sp|P18031|PTN1_HUMAN Tyrosine-protein phosphatase non-receptor type 1 OS=Homo sapiens OX=9606 GN=PTPN1 PE=1 SV=1	1	27.1207	controllerType=0 controllerNumber=1 scan=16135		20240605_bodo_mlh01_dmlv038_10.ScanId;v=1;d1=16135.16135.4	hcd	0	0	0	0	1e-21	1.4e-21	FTMS + c NSI d Full ms2 987.7535@hcd30.00 [120.0000-4053.2981]
20 | 1426	1	258	R.MGLIQTADQLRFSYLAVIEGAK.F			1.3e-14	1.8e-14	13.89	850.1	850.1	850.1	3	808.771	808.77	1.83		2424.3	2424.3	Specific		>sp|P18031|PTN1_HUMAN Tyrosine-protein phosphatase non-receptor type 1 OS=Homo sapiens OX=9606 GN=PTPN1 PE=1 SV=1	1	25.2586	controllerType=0 controllerNumber=1 scan=15141		20240605_bodo_mlh01_dmlv038_10.ScanId;v=1;d1=15141.15141.3	hcd	0	0	0	0	1.4e-15	1.9e-15	FTMS + c NSI d Full ms2 809.1056@hcd30.00 [120.0000-2498.3110]
21 | 391	1	258	R.MGLIQTADQLR.F			2e-08	2.8e-08	7.69	620.9	620.9	620.9	2	623.336	623.335	2		1245.66	1245.66	Specific		>sp|P18031|PTN1_HUMAN Tyrosine-protein phosphatase non-receptor type 1 OS=Homo sapiens OX=9606 GN=PTPN1 PE=1 SV=1	1	20.7667	controllerType=0 controllerNumber=1 scan=11515		20240605_bodo_mlh01_dmlv038_10.ScanId;v=1;d1=11515.11515.2	hcd	0	0	0	0	9.9e-10	1.4e-09	FTMS + c NSI d Full ms2 623.3361@hcd30.00 [120.0000-1293.2375]
22 | 142	1	239	R.KDPSSVDIKK.V			1.2e-06	1.6e-06	5.93	599	599	599	2	558.817	558.817	0.75		1116.63	1116.63	Specific		>sp|P18031|PTN1_HUMAN Tyrosine-protein phosphatase non-receptor type 1 OS=Homo sapiens OX=9606 GN=PTPN1 PE=1 SV=1	1	15.4785	controllerType=0 controllerNumber=1 scan=6167		20240605_bodo_mlh01_dmlv038_10.ScanId;v=1;d1=6167.6167.2	hcd	0	0	0	0	1.2e-07	1.6e-07	FTMS + c NSI d Full ms2 558.7692@hcd30.00 [120.0000-1161.5212]
23 | 190	1	239	R.KDPSSVDIK.K			0.024	0.033	1.62	470.8	106.8	106.8	2	494.77	494.769	1.58		988.533	988.531	Specific		>sp|P18031|PTN1_HUMAN Tyrosine-protein phosphatase non-receptor type 1 OS=Homo sapiens OX=9606 GN=PTPN1 PE=1 SV=1	1	15.822	controllerType=0 controllerNumber=1 scan=6515		20240605_bodo_mlh01_dmlv038_10.ScanId;v=1;d1=6515.6515.3	hcd	0	0	0	0	0.00095	0.0013	FTMS + c NSI d Full ms2 494.8948@hcd30.00 [120.0000-1536.8262]
24 | 232	1	316	R.ILEPHNGK.C			0.00049	0.00067	3.31	454	454	454	2	454.255	454.253	2.59		907.502	907.5	Specific		>sp|P18031|PTN1_HUMAN Tyrosine-protein phosphatase non-receptor type 1 OS=Homo sapiens OX=9606 GN=PTPN1 PE=1 SV=1	1	16.1403	controllerType=0 controllerNumber=1 scan=6858		20240605_bodo_mlh01_dmlv038_10.ScanId;v=1;d1=6858.6858.3	hcd	0	0	0	0	2.4e-05	3.3e-05	FTMS + c NSI d Full ms2 453.8940@hcd30.00 [120.0000-1411.3635]
25 | 1563	1	57	R.IKLHQEDNDYINASLIKMEEAQR.S			2.6e-24	3.6e-24	23.58	1362.8	1362.8	1362.8	3	920.134	920.133	1.86		2758.39	2758.38	Specific		>sp|P18031|PTN1_HUMAN Tyrosine-protein phosphatase non-receptor type 1 OS=Homo sapiens OX=9606 GN=PTPN1 PE=1 SV=1	1	20.9687	controllerType=0 controllerNumber=1 scan=11737		20240605_bodo_mlh01_dmlv038_10.ScanId;v=1;d1=11737.11737.3	hcd	0	0	0	0	2.6e-24	3.6e-24	FTMS + c NSI d Full ms2 920.4675@hcd30.00 [120.0000-2839.0786]
26 | 959	1	57	R.IKLHQEDNDYINASLIK.M			1.3e-13	1.8e-13	12.87	880.7	880.7	880.7	2	1007.53	1007.53	0.63		2014.06	2014.06	Specific		>sp|P18031|PTN1_HUMAN Tyrosine-protein phosphatase non-receptor type 1 OS=Homo sapiens OX=9606 GN=PTPN1 PE=1 SV=1	1	19.9998	controllerType=0 controllerNumber=1 scan=10747		20240605_bodo_mlh01_dmlv038_10.ScanId;v=1;d1=10747.10747.2	hcd	0	0	0	0	1.2e-14	1.6e-14	FTMS + c NSI d Full ms2 1008.0356@hcd30.00 [120.0000-2078.0247]
27 | 234	1	25	R.HEASDFPC[+57.02146]R.V			3.1e-07	4.3e-07	6.5	613	613	613	2	559.738	559.738	0.93		1118.47	1118.47	Specific		>sp|P18031|PTN1_HUMAN Tyrosine-protein phosphatase non-receptor type 1 OS=Homo sapiens OX=9606 GN=PTPN1 PE=1 SV=1	1	16.1503	controllerType=0 controllerNumber=1 scan=6867	C8(Carbamidomethyl / 57.0215)	20240605_bodo_mlh01_dmlv038_10.ScanId;v=1;d1=6867.6867.2	hcd	0	0	0	0	2.7e-08	3.8e-08	FTMS + c NSI d Full ms2 559.7384@hcd30.00 [120.0000-1163.4983]
28 | 984	1	106	R.GVVMLNRVMEKGSLK.C			5.2e-07	7.1e-07	6.28	478.7	478.7	478.7	3	554.314	554.313	2.42		1660.93	1660.92	Specific		>sp|P18031|PTN1_HUMAN Tyrosine-protein phosphatase non-receptor type 1 OS=Homo sapiens OX=9606 GN=PTPN1 PE=1 SV=1	1	20.1204	controllerType=0 controllerNumber=1 scan=10879		20240605_bodo_mlh01_dmlv038_10.ScanId;v=1;d1=10879.10879.3	hcd	0	0	0	0	5.8e-08	7.9e-08	FTMS + c NSI d Full ms2 554.3137@hcd30.00 [120.0000-1718.6479]
29 | 371	1	106	R.GVVMLNRVMEK.G			2.7e-07	3.8e-07	6.56	644.5	644.5	644.5	2	638.35	638.349	1.75		1275.69	1275.69	Specific		>sp|P18031|PTN1_HUMAN Tyrosine-protein phosphatase non-receptor type 1 OS=Homo sapiens OX=9606 GN=PTPN1 PE=1 SV=1	1	19.8538	controllerType=0 controllerNumber=1 scan=10589		20240605_bodo_mlh01_dmlv038_10.ScanId;v=1;d1=10589.10589.2	hcd	0	0	0	0	2.5e-08	3.4e-08	FTMS + c NSI d Full ms2 638.3505@hcd30.00 [120.0000-1323.8669]
30 | 491	1	381	R.GAQAASPAKGEPSLPEK.D			5.4e-14	7.4e-14	13.27	902.2	902.2	902.2	2	819.43	819.428	2.59		1637.85	1637.85	Specific		>sp|P18031|PTN1_HUMAN Tyrosine-protein phosphatase non-receptor type 1 OS=Homo sapiens OX=9606 GN=PTPN1 PE=1 SV=1	1	16.462	controllerType=0 controllerNumber=1 scan=7199		20240605_bodo_mlh01_dmlv038_10.ScanId;v=1;d1=7199.7199.2	hcd	0	0	0	0	5.4e-15	7.3e-15	FTMS + c NSI d Full ms2 819.9288@hcd30.00 [120.0000-1694.2869]
31 | 5	1	381	R.GAQAASPAK.G			5.5e-05	7.6e-05	4.26	461.3	461.3	461.3	2	400.717	400.717	1.96		800.428	800.426	Specific		>sp|P18031|PTN1_HUMAN Tyrosine-protein phosphatase non-receptor type 1 OS=Homo sapiens OX=9606 GN=PTPN1 PE=1 SV=1	1	14.37	controllerType=0 controllerNumber=1 scan=5314		20240605_bodo_mlh01_dmlv038_10.ScanId;v=1;d1=5314.5314.2	hcd	0	0	0	0	3.4e-06	4.7e-06	FTMS + c NSI d Full ms2 401.2519@hcd30.00 [120.0000-840.1859]
32 | 1773	1	269	R.FSYLAVIEGAKFIMGDSSVQDQWK.E			1.3e-18	1.8e-18	17.89	1099.1	1099.1	1099.1	3	907.121	907.119	1.31		2719.35	2719.34	Specific		>sp|P18031|PTN1_HUMAN Tyrosine-protein phosphatase non-receptor type 1 OS=Homo sapiens OX=9606 GN=PTPN1 PE=1 SV=1	1	25.3855	controllerType=0 controllerNumber=1 scan=15211		20240605_bodo_mlh01_dmlv038_10.ScanId;v=1;d1=15211.15211.3	hcd	0	0	0	0	1.8e-19	2.4e-19	FTMS + c NSI d Full ms2 907.4563@hcd30.00 [120.0000-2799.2642]
33 | 414	1	269	R.FSYLAVIEGAK.F			1.2e-07	1.7e-07	6.9	586.2	586.2	586.2	2	599.33	599.329	0.52		1197.65	1197.65	Specific		>sp|P18031|PTN1_HUMAN Tyrosine-protein phosphatase non-receptor type 1 OS=Homo sapiens OX=9606 GN=PTPN1 PE=1 SV=1	1	22.4224	controllerType=0 controllerNumber=1 scan=13146		20240605_bodo_mlh01_dmlv038_10.ScanId;v=1;d1=13146.13146.2	hcd	0	0	0	0	8.6e-09	1.2e-08	FTMS + c NSI d Full ms2 599.3301@hcd30.00 [120.0000-1244.2655]
34 | 1167	1	200	R.ESGSLSPEHGPVVVHC[+57.02146]SAGIGR.S			5.1e-19	7e-19	18.29	1131.3	1027.7	1027.7	2	1116.54	1116.54	-0.3		2232.08	2232.08	Specific		>sp|P18031|PTN1_HUMAN Tyrosine-protein phosphatase non-receptor type 1 OS=Homo sapiens OX=9606 GN=PTPN1 PE=1 SV=1	1	18.0797	controllerType=0 controllerNumber=1 scan=8811	C16(Carbamidomethyl / 57.0215)	20240605_bodo_mlh01_dmlv038_10.ScanId;v=1;d1=8811.8811.2	hcd	0	0	0	0	7.6e-20	1e-19	FTMS + c NSI d Full ms2 1117.0479@hcd30.00 [120.0000-2300.4097]
35 | 2109	1	170	R.EILHFHYTTWPDFGVPESPASFLNFLFK.V			1.3e-19	1.8e-19	18.87	1215.5	1215.5	1215.5	3	1113.89	1113.89	1.38		3339.66	3339.65	Specific		>sp|P18031|PTN1_HUMAN Tyrosine-protein phosphatase non-receptor type 1 OS=Homo sapiens OX=9606 GN=PTPN1 PE=1 SV=1	1	27.1094	controllerType=0 controllerNumber=1 scan=16129		20240605_bodo_mlh01_dmlv038_10.ScanId;v=1;d1=16129.16129.3	hcd	0	0	0	0	1.8e-20	2.4e-20	FTMS + c NSI d Full ms2 1114.5574@hcd30.00 [120.0000-3432.9937]
36 | 735	1	326	R.EFFPNHQWVK.E			6.7e-11	9.2e-11	10.17	802.2	802.2	802.2	2	666.332	666.33	2.83		1331.66	1331.65	Specific		>sp|P18031|PTN1_HUMAN Tyrosine-protein phosphatase non-receptor type 1 OS=Homo sapiens OX=9606 GN=PTPN1 PE=1 SV=1	1	20.2738	controllerType=0 controllerNumber=1 scan=11042		20240605_bodo_mlh01_dmlv038_10.ScanId;v=1;d1=11042.11042.3	hcd	0	0	0	0	3.5e-12	4.8e-12	FTMS + c NSI d Full ms2 666.3628@hcd30.00 [120.0000-2061.5181]
37 | 601	1	48	R.DVSPFDHSRIK.L			4.7e-06	6.5e-06	5.32	466.1	466.1	466.1	3	434.228	434.226	3.29		1300.67	1300.66	Specific		>sp|P18031|PTN1_HUMAN Tyrosine-protein phosphatase non-receptor type 1 OS=Homo sapiens OX=9606 GN=PTPN1 PE=1 SV=1	1	18.0304	controllerType=0 controllerNumber=1 scan=8765		20240605_bodo_mlh01_dmlv038_10.ScanId;v=1;d1=8765.8765.3	hcd	0	0	0	0	3.3e-07	4.5e-07	FTMS + c NSI d Full ms2 434.2276@hcd30.00 [120.0000-1351.1844]
38 | 295	1	48	R.DVSPFDHSR.I			5.1e-07	7e-07	6.29	638.1	517.3	517.3	2	530.248	530.246	2.38		1059.49	1059.49	Specific		>sp|P18031|PTN1_HUMAN Tyrosine-protein phosphatase non-receptor type 1 OS=Homo sapiens OX=9606 GN=PTPN1 PE=1 SV=1	1	17.3936	controllerType=0 controllerNumber=1 scan=8119		20240605_bodo_mlh01_dmlv038_10.ScanId;v=1;d1=8119.8119.2	hcd	0	0	0	0	5.4e-08	7.5e-08	FTMS + c NSI d Full ms2 530.2476@hcd30.00 [120.0000-1103.3372]
39 | 1159	1	198	K.VRESGSLSPEHGPVVVHC[+57.02146]SAGIGR.S			1.9e-19	2.6e-19	18.72	1140.7	1140.7	1140.7	3	829.756	829.756	0.92		2487.25	2487.25	Specific		>sp|P18031|PTN1_HUMAN Tyrosine-protein phosphatase non-receptor type 1 OS=Homo sapiens OX=9606 GN=PTPN1 PE=1 SV=1	1	17.9062	controllerType=0 controllerNumber=1 scan=8633	C18(Carbamidomethyl / 57.0215)	20240605_bodo_mlh01_dmlv038_10.ScanId;v=1;d1=8633.8633.3	hcd	0	0	0	0	2.5e-20	3.4e-20	FTMS + c NSI d Full ms2 829.7568@hcd30.00 [120.0000-2561.5037]
40 | 342	1	249	K.VLLEMRK.F			0.01	0.014	1.98	323.8	276.2	276.2	2	444.772	444.77	2.5		888.536	888.534	Specific		>sp|P18031|PTN1_HUMAN Tyrosine-protein phosphatase non-receptor type 1 OS=Homo sapiens OX=9606 GN=PTPN1 PE=1 SV=1	1	18.3119	controllerType=0 controllerNumber=1 scan=9030		20240605_bodo_mlh01_dmlv038_10.ScanId;v=1;d1=9030.9030.2	hcd	0	0	0	0	0.00037	0.00051	FTMS + c NSI d Full ms2 444.7714@hcd30.00 [120.0000-928.9656]
41 | 252	1	104	K.SRGVVM[+15.99492]LNR.V	M6(Oxidation / 15.9949)		0.00012	0.00017	3.9	510.2	510.2	510.2	2	524.292	524.29	3.64		1047.58	1047.57	Specific		>sp|P18031|PTN1_HUMAN Tyrosine-protein phosphatase non-receptor type 1 OS=Homo sapiens OX=9606 GN=PTPN1 PE=1 SV=1	1	16.6157	controllerType=0 controllerNumber=1 scan=7353		20240605_bodo_mlh01_dmlv038_10.ScanId;v=1;d1=7353.7353.2	hcd	0	0	0	0	7e-06	9.6e-06	FTMS + c NSI d Full ms2 524.2917@hcd30.00 [120.0000-1091.1871]
42 | 654	1	104	K.SRGVVMLNRVMEK.G			0.00059	0.0008	3.23	438.9	362.3	362.3	3	506.948	506.946	2.77		1518.83	1518.82	Specific		>sp|P18031|PTN1_HUMAN Tyrosine-protein phosphatase non-receptor type 1 OS=Homo sapiens OX=9606 GN=PTPN1 PE=1 SV=1	1	19.4265	controllerType=0 controllerNumber=1 scan=10143		20240605_bodo_mlh01_dmlv038_10.ScanId;v=1;d1=10143.10143.3	hcd	0	0	0	0	2.8e-05	3.8e-05	FTMS + c NSI d Full ms2 506.9475@hcd30.00 [120.0000-1573.7074]
43 | 312	1	104	K.SRGVVMLNR.V			0.00023	0.00032	3.63	428.2	428.2	428.2	2	516.293	516.293	1.84		1031.58	1031.58	Specific		>sp|P18031|PTN1_HUMAN Tyrosine-protein phosphatase non-receptor type 1 OS=Homo sapiens OX=9606 GN=PTPN1 PE=1 SV=1	1	17.5963	controllerType=0 controllerNumber=1 scan=8316		20240605_bodo_mlh01_dmlv038_10.ScanId;v=1;d1=8316.8316.2	hcd	0	0	0	0	1.2e-05	1.7e-05	FTMS + c NSI d Full ms2 516.2936@hcd30.00 [120.0000-1074.8708]
44 | 1374	1	13	K.SGSWAAIYQDIRHEASDFPC[+57.02146]R.V			5.8e-16	7.9e-16	15.24	951.7	951.7	951.7	3	822.715	822.713	2.07		2466.13	2466.13	Specific		>sp|P18031|PTN1_HUMAN Tyrosine-protein phosphatase non-receptor type 1 OS=Homo sapiens OX=9606 GN=PTPN1 PE=1 SV=1	1	22.8642	controllerType=0 controllerNumber=1 scan=13588	C20(Carbamidomethyl / 57.0215)	20240605_bodo_mlh01_dmlv038_10.ScanId;v=1;d1=13588.13588.3	hcd	0	0	0	0	5.9e-17	8.1e-17	FTMS + c NSI d Full ms2 823.0497@hcd30.00 [120.0000-2540.9800]
45 | 806	1	13	K.SGSWAAIYQDIR.H			2.2e-10	3.1e-10	9.65	667.7	667.7	667.7	2	683.841	683.841	0.26		1366.68	1366.67	Specific		>sp|P18031|PTN1_HUMAN Tyrosine-protein phosphatase non-receptor type 1 OS=Homo sapiens OX=9606 GN=PTPN1 PE=1 SV=1	1	21.8976	controllerType=0 controllerNumber=1 scan=12706		20240605_bodo_mlh01_dmlv038_10.ScanId;v=1;d1=12706.12706.2	hcd	0	0	0	0	1.4e-11	2e-11	FTMS + c NSI d Full ms2 683.8421@hcd30.00 [120.0000-1416.6698]
46 | 153	1	238	K.RKDPSSVDIK.K			5.4e-06	7.5e-06	5.26	560.7	398	398	2	572.821	572.82	2.3		1144.63	1144.63	Specific		>sp|P18031|PTN1_HUMAN Tyrosine-protein phosphatase non-receptor type 1 OS=Homo sapiens OX=9606 GN=PTPN1 PE=1 SV=1	1	15.5572	controllerType=0 controllerNumber=1 scan=6246		20240605_bodo_mlh01_dmlv038_10.ScanId;v=1;d1=6246.6246.2	hcd	0	0	0	0	3.9e-07	5.3e-07	FTMS + c NSI d Full ms2 573.3216@hcd30.00 [120.0000-1191.2080]
47 | 117	1	315	K.RILEPHNGK.C			6.6e-08	9.1e-08	7.18	652.3	471.5	471.5	2	532.305	532.304	1.66		1063.6	1063.6	Specific		>sp|P18031|PTN1_HUMAN Tyrosine-protein phosphatase non-receptor type 1 OS=Homo sapiens OX=9606 GN=PTPN1 PE=1 SV=1	1	15.3095	controllerType=0 controllerNumber=1 scan=5980		20240605_bodo_mlh01_dmlv038_10.ScanId;v=1;d1=5980.5980.2	hcd	0	0	0	0	2.8e-09	3.9e-09	FTMS + c NSI d Full ms2 532.3051@hcd30.00 [120.0000-1107.5344]
48 | 1024	1	142	K.LTLISEDIKSYYTVR.Q			4e-15	5.4e-15	14.4	935.3	935.3	935.3	2	900.993	900.991	2.02		1800.98	1800.97	Specific		>sp|P18031|PTN1_HUMAN Tyrosine-protein phosphatase non-receptor type 1 OS=Homo sapiens OX=9606 GN=PTPN1 PE=1 SV=1	1	21.7809	controllerType=0 controllerNumber=1 scan=12588		20240605_bodo_mlh01_dmlv038_10.ScanId;v=1;d1=12588.12588.2	hcd	0	0	0	0	6.4e-16	8.8e-16	FTMS + c NSI d Full ms2 901.4942@hcd30.00 [120.0000-1860.6802]
49 | 403	1	142	K.LTLISEDIK.S			0.0015	0.0021	2.82	389.4	293.5	293.5	2	516.304	516.303	1.9		1031.6	1031.6	Specific		>sp|P18031|PTN1_HUMAN Tyrosine-protein phosphatase non-receptor type 1 OS=Homo sapiens OX=9606 GN=PTPN1 PE=1 SV=1	1	20.8724	controllerType=0 controllerNumber=1 scan=11631		20240605_bodo_mlh01_dmlv038_10.ScanId;v=1;d1=11631.11631.2	hcd	0	0	0	0	6.6e-05	9.1e-05	FTMS + c NSI d Full ms2 515.7499@hcd30.00 [120.0000-1073.7620]
50 | 1260	1	59	K.LHQEDNDYINASLIKM[+15.99492]EEAQR.S	M16(Oxidation / 15.9949)		7.6e-18	1e-17	17.12	1055.9	1055.9	1055.9	3	845.073	845.071	2.79		2533.21	2533.2	Specific		>sp|P18031|PTN1_HUMAN Tyrosine-protein phosphatase non-receptor type 1 OS=Homo sapiens OX=9606 GN=PTPN1 PE=1 SV=1	1	19.5063	controllerType=0 controllerNumber=1 scan=10217		20240605_bodo_mlh01_dmlv038_10.ScanId;v=1;d1=10217.10217.3	hcd	0	0	0	0	1.4e-18	1.9e-18	FTMS + c NSI d Full ms2 845.4091@hcd30.00 [120.0000-2609.3997]
51 | 1327	1	59	K.LHQEDNDYINASLIKMEEAQR.S			5.8e-21	7.9e-21	20.24	1235.2	1235.2	1235.2	3	839.741	839.74	2.34		2517.21	2517.2	Specific		>sp|P18031|PTN1_HUMAN Tyrosine-protein phosphatase non-receptor type 1 OS=Homo sapiens OX=9606 GN=PTPN1 PE=1 SV=1	1	20.984	controllerType=0 controllerNumber=1 scan=11754		20240605_bodo_mlh01_dmlv038_10.ScanId;v=1;d1=11754.11754.3	hcd	0	0	0	0	1.9e-21	2.5e-21	FTMS + c NSI d Full ms2 840.0748@hcd30.00 [120.0000-2593.0767]
52 | 950	1	59	K.LHQEDNDYINASLIK.M			6.6e-14	9e-14	13.18	857.9	738.9	738.9	2	886.945	886.944	1.26		1772.88	1772.88	Specific		>sp|P18031|PTN1_HUMAN Tyrosine-protein phosphatase non-receptor type 1 OS=Homo sapiens OX=9606 GN=PTPN1 PE=1 SV=1	1	19.9696	controllerType=0 controllerNumber=1 scan=10711		20240605_bodo_mlh01_dmlv038_10.ScanId;v=1;d1=10711.10711.2	hcd	0	0	0	0	6.7e-15	9.1e-15	FTMS + c NSI d Full ms2 886.9459@hcd30.00 [120.0000-1831.0015]
53 | 314	1	248	K.KVLLEMRK.F			9.5e-06	1.3e-05	5.02	548.4	406.6	406.6	2	508.819	508.818	1.83		1016.63	1016.63	Specific		>sp|P18031|PTN1_HUMAN Tyrosine-protein phosphatase non-receptor type 1 OS=Homo sapiens OX=9606 GN=PTPN1 PE=1 SV=1	1	17.603	controllerType=0 controllerNumber=1 scan=8325		20240605_bodo_mlh01_dmlv038_10.ScanId;v=1;d1=8325.8325.2	hcd	0	0	0	0	5.7e-07	7.7e-07	FTMS + c NSI d Full ms2 508.8189@hcd30.00 [120.0000-1059.6227]
54 | 347	1	248	K.KVLLEMR.K			0.021	0.028	1.68	305	279	279	2	444.771	444.77	2.15		888.535	888.534	Specific		>sp|P18031|PTN1_HUMAN Tyrosine-protein phosphatase non-receptor type 1 OS=Homo sapiens OX=9606 GN=PTPN1 PE=1 SV=1	1	18.898	controllerType=0 controllerNumber=1 scan=9678		20240605_bodo_mlh01_dmlv038_10.ScanId;v=1;d1=9678.9678.2	hcd	0	0	0	0	0.00077	0.0011	FTMS + c NSI d Full ms2 445.9653@hcd30.00 [120.0000-931.4012]
55 | 1256	1	351	K.GSPLNAAPYGIESM[+15.99492]SQDTEVRSR.V	M14(Oxidation / 15.9949)		0.00046	0.00063	3.34	359.3	359.3	359.3	3	827.73	827.727	3.31		2481.18	2481.17	Specific		>sp|P18031|PTN1_HUMAN Tyrosine-protein phosphatase non-receptor type 1 OS=Homo sapiens OX=9606 GN=PTPN1 PE=1 SV=1	1	19.2221	controllerType=0 controllerNumber=1 scan=9972		20240605_bodo_mlh01_dmlv038_10.ScanId;v=1;d1=9972.9972.3	hcd	0	0	0	0	2.3e-05	3.2e-05	FTMS + c NSI d Full ms2 828.0643@hcd30.00 [120.0000-2556.3247]
56 | 1270	1	351	K.GSPLNAAPYGIESM[+15.99492]SQDTEVR.S	M14(Oxidation / 15.9949)		4e-10	5.4e-10	9.4	694.3	694.3	694.3	2	1119.52	1119.52	0.55		2238.04	2238.03	Specific		>sp|P18031|PTN1_HUMAN Tyrosine-protein phosphatase non-receptor type 1 OS=Homo sapiens OX=9606 GN=PTPN1 PE=1 SV=1	1	19.5982	controllerType=0 controllerNumber=1 scan=10318		20240605_bodo_mlh01_dmlv038_10.ScanId;v=1;d1=10318.10318.2	hcd	0	0	0	0	3.1e-11	4.2e-11	FTMS + c NSI d Full ms2 1120.0215@hcd30.00 [120.0000-2306.4758]
57 | 1309	1	351	K.GSPLNAAPYGIESMSQDTEVRSR.V			2.8e-14	3.8e-14	13.56	885.2	885.2	885.2	3	822.398	822.396	2.48		2465.18	2465.17	Specific		>sp|P18031|PTN1_HUMAN Tyrosine-protein phosphatase non-receptor type 1 OS=Homo sapiens OX=9606 GN=PTPN1 PE=1 SV=1	1	20.5568	controllerType=0 controllerNumber=1 scan=11330		20240605_bodo_mlh01_dmlv038_10.ScanId;v=1;d1=11330.11330.3	hcd	0	0	0	0	3.6e-15	5e-15	FTMS + c NSI d Full ms2 822.3963@hcd30.00 [120.0000-2538.9807]
58 | 1321	1	351	K.GSPLNAAPYGIESMSQDTEVR.S			4e-13	5.4e-13	12.4	808.2	808.2	808.2	3	741.346	741.351	-6.79		2222.02	2222.04	Specific		>sp|P18031|PTN1_HUMAN Tyrosine-protein phosphatase non-receptor type 1 OS=Homo sapiens OX=9606 GN=PTPN1 PE=1 SV=1	1	20.8711	controllerType=0 controllerNumber=1 scan=11629		20240605_bodo_mlh01_dmlv038_10.ScanId;v=1;d1=11629.11629.3	hcd	0	0	0	0	4.7e-14	6.5e-14	FTMS + c NSI d Full ms2 742.0142@hcd30.00 [120.0000-2293.0115]
59 | 55	1	390	K.GEPSLPEK.D			5.3e-06	7.3e-06	5.27	569.6	448.4	448.4	1	856.442	856.441	1.67		856.442	856.441	Specific		>sp|P18031|PTN1_HUMAN Tyrosine-protein phosphatase non-receptor type 1 OS=Homo sapiens OX=9606 GN=PTPN1 PE=1 SV=1	1	16.5337	controllerType=0 controllerNumber=1 scan=7273		20240605_bodo_mlh01_dmlv038_10.ScanId;v=1;d1=7273.7273.2	hcd	0	0	0	0	3.7e-07	5e-07	FTMS + c NSI d Full ms2 856.3972@hcd30.00 [120.0000-1768.6824]
60 | 697	1	256	K.FRM[+15.99492]GLIQTADQLR.F	M3(Oxidation / 15.9949)		1.9e-06	2.7e-06	5.71	499.4	499.4	499.4	3	522.282	522.28	2.36		1564.83	1564.83	Specific		>sp|P18031|PTN1_HUMAN Tyrosine-protein phosphatase non-receptor type 1 OS=Homo sapiens OX=9606 GN=PTPN1 PE=1 SV=1	1	20.125	controllerType=0 controllerNumber=1 scan=10886		20240605_bodo_mlh01_dmlv038_10.ScanId;v=1;d1=10886.10886.3	hcd	0	0	0	0	1.8e-07	2.4e-07	FTMS + c NSI d Full ms2 522.2816@hcd30.00 [120.0000-1620.6295]
61 | 1790	1	256	K.FRMGLIQTADQLRFSYLAVIEGAK.F			1.8e-12	2.5e-12	11.74	790.9	790.9	790.9	4	682.623	682.622	2.06		2727.47	2727.47	Specific		>sp|P18031|PTN1_HUMAN Tyrosine-protein phosphatase non-receptor type 1 OS=Homo sapiens OX=9606 GN=PTPN1 PE=1 SV=1	1	25.5671	controllerType=0 controllerNumber=1 scan=15310		20240605_bodo_mlh01_dmlv038_10.ScanId;v=1;d1=15310.15310.4	hcd	0	0	0	0	1.5e-13	2.1e-13	FTMS + c NSI d Full ms2 682.8740@hcd30.00 [120.0000-2809.3896]
62 | 791	1	256	K.FRMGLIQTADQLR.F			2.1e-07	2.8e-07	6.68	458.4	458.4	458.4	3	516.95	516.949	2.45		1548.84	1548.83	Specific		>sp|P18031|PTN1_HUMAN Tyrosine-protein phosphatase non-receptor type 1 OS=Homo sapiens OX=9606 GN=PTPN1 PE=1 SV=1	1	21.611	controllerType=0 controllerNumber=1 scan=12393		20240605_bodo_mlh01_dmlv038_10.ScanId;v=1;d1=12393.12393.3	hcd	0	0	0	0	1.7e-08	2.4e-08	FTMS + c NSI d Full ms2 516.9499@hcd30.00 [120.0000-1604.3147]
63 | 1977	1	280	K.FIM[+15.99492]GDSSVQDQWKELSHEDLEPPPEHIPPPPRPPK.R	M3(Oxidation / 15.9949)		1.1e-05	1.6e-05	4.94	507.2	507.2	507.2	5	810.002	810.001	1.13		4045.98	4045.98	Specific		>sp|P18031|PTN1_HUMAN Tyrosine-protein phosphatase non-receptor type 1 OS=Homo sapiens OX=9606 GN=PTPN1 PE=1 SV=1	1	21.1859	controllerType=0 controllerNumber=1 scan=11973		20240605_bodo_mlh01_dmlv038_10.ScanId;v=1;d1=11973.11973.5	hcd	0	0	0	0	7e-07	9.6e-07	FTMS + c NSI d Full ms2 810.2026@hcd30.00 [120.0000-4156.1138]
64 | 641	1	280	K.FIM[+15.99492]GDSSVQDQWK.E	M3(Oxidation / 15.9949)		4.8e-10	6.6e-10	9.32	659.5	547.5	547.5	2	778.858	778.856	2.53		1556.71	1556.7	Specific		>sp|P18031|PTN1_HUMAN Tyrosine-protein phosphatase non-receptor type 1 OS=Homo sapiens OX=9606 GN=PTPN1 PE=1 SV=1	1	19.2801	controllerType=0 controllerNumber=1 scan=10018		20240605_bodo_mlh01_dmlv038_10.ScanId;v=1;d1=10018.10018.2	hcd	0	0	0	0	4.2e-11	5.7e-11	FTMS + c NSI d Full ms2 778.8582@hcd30.00 [120.0000-1610.5028]
65 | 1998	1	280	K.FIMGDSSVQDQWKELSHEDLEPPPEHIPPPPRPPKR.I			1.1e-21	1.5e-21	20.95	1290.6	1290.6	1290.6	5	838.025	838.022	3.57		4186.1	4186.08	Specific		>sp|P18031|PTN1_HUMAN Tyrosine-protein phosphatase non-receptor type 1 OS=Homo sapiens OX=9606 GN=PTPN1 PE=1 SV=1	1	21.6335	controllerType=0 controllerNumber=1 scan=12420		20240605_bodo_mlh01_dmlv038_10.ScanId;v=1;d1=12420.12420.5	hcd	0	0	0	0	4.2e-22	5.7e-22	FTMS + c NSI d Full ms2 838.6260@hcd30.00 [120.0000-4301.0728]
66 | 2020	1	280	K.FIMGDSSVQDQWKELSHEDLEPPPEHIPPPPRPPK.R			4.8e-21	6.5e-21	20.32	1223.8	1223.8	1223.8	4	1008.25	1008.25	0.16		4029.98	4029.98	Specific		>sp|P18031|PTN1_HUMAN Tyrosine-protein phosphatase non-receptor type 1 OS=Homo sapiens OX=9606 GN=PTPN1 PE=1 SV=1	1	21.7411	controllerType=0 controllerNumber=1 scan=12543		20240605_bodo_mlh01_dmlv038_10.ScanId;v=1;d1=12543.12543.4	hcd	0	0	0	0	1.6e-21	2.2e-21	FTMS + c NSI d Full ms2 1008.7535@hcd30.00 [120.0000-4138.9785]
67 | 773	1	280	K.FIMGDSSVQDQWK.E			3.7e-08	5e-08	7.44	584.8	584.8	584.8	2	770.861	770.859	2.35		1540.71	1540.71	Specific		>sp|P18031|PTN1_HUMAN Tyrosine-protein phosphatase non-receptor type 1 OS=Homo sapiens OX=9606 GN=PTPN1 PE=1 SV=1	1	20.6935	controllerType=0 controllerNumber=1 scan=11446		20240605_bodo_mlh01_dmlv038_10.ScanId;v=1;d1=11446.11446.2	hcd	0	0	0	0	1.7e-09	2.3e-09	FTMS + c NSI d Full ms2 770.8604@hcd30.00 [120.0000-1594.1871]
68 | 1733	1	132	K.EM[+15.99492]IFEDTNLKLTLISEDIKSYYTVR.Q	M2(Oxidation / 15.9949)		1.7e-21	2.4e-21	20.76	1253.6	1253.6	1253.6	4	760.143	760.141	1.56		3037.55	3037.54	Specific		>sp|P18031|PTN1_HUMAN Tyrosine-protein phosphatase non-receptor type 1 OS=Homo sapiens OX=9606 GN=PTPN1 PE=1 SV=1	1	23.9094	controllerType=0 controllerNumber=1 scan=14346		20240605_bodo_mlh01_dmlv038_10.ScanId;v=1;d1=14346.14346.4	hcd	0	0	0	0	6.7e-22	9.2e-22	FTMS + c NSI d Full ms2 760.3935@hcd30.00 [120.0000-3125.6694]
69 | 1365	1	132	K.EM[+15.99492]IFEDTNLKLTLISEDIK.S	M2(Oxidation / 15.9949)		2.4e-14	3.3e-14	13.62	861.3	757.6	757.6	3	756.729	756.727	2.19		2268.17	2268.17	Specific		>sp|P18031|PTN1_HUMAN Tyrosine-protein phosphatase non-receptor type 1 OS=Homo sapiens OX=9606 GN=PTPN1 PE=1 SV=1	1	22.6793	controllerType=0 controllerNumber=1 scan=13432		20240605_bodo_mlh01_dmlv038_10.ScanId;v=1;d1=13432.13432.3	hcd	0	0	0	0	2.7e-15	3.7e-15	FTMS + c NSI d Full ms2 757.0630@hcd30.00 [120.0000-2339.0608]
70 | 350	1	132	K.EM[+15.99492]IFEDTNLK.L	M2(Oxidation / 15.9949)		3.1e-06	4.3e-06	5.5	459.9	381.4	381.4	2	628.299	628.297	2.31		1255.59	1255.59	Specific		>sp|P18031|PTN1_HUMAN Tyrosine-protein phosphatase non-receptor type 1 OS=Homo sapiens OX=9606 GN=PTPN1 PE=1 SV=1	1	19.5454	controllerType=0 controllerNumber=1 scan=10257		20240605_bodo_mlh01_dmlv038_10.ScanId;v=1;d1=10257.10257.2	hcd	0	0	0	0	2.5e-07	3.4e-07	FTMS + c NSI d Full ms2 628.2994@hcd30.00 [120.0000-1303.3628]
71 | 1752	1	132	K.EMIFEDTNLKLTLISEDIKSYYTVR.Q			4.2e-24	5.8e-24	23.37	1421.4	1421.4	1421.4	3	1007.86	1007.85	1.55		3021.55	3021.55	Specific		>sp|P18031|PTN1_HUMAN Tyrosine-protein phosphatase non-receptor type 1 OS=Homo sapiens OX=9606 GN=PTPN1 PE=1 SV=1	1	24.3069	controllerType=0 controllerNumber=1 scan=14591		20240605_bodo_mlh01_dmlv038_10.ScanId;v=1;d1=14591.14591.3	hcd	0	0	0	0	3.4e-24	4.7e-24	FTMS + c NSI d Full ms2 1008.5223@hcd30.00 [120.0000-3108.5264]
72 | 1403	1	132	K.EMIFEDTNLKLTLISEDIK.S			3.5e-18	4.8e-18	17.45	1085.8	895	895	2	1126.59	1126.59	1.17		2252.18	2252.17	Specific		>sp|P18031|PTN1_HUMAN Tyrosine-protein phosphatase non-receptor type 1 OS=Homo sapiens OX=9606 GN=PTPN1 PE=1 SV=1	1	23.2663	controllerType=0 controllerNumber=1 scan=13906		20240605_bodo_mlh01_dmlv038_10.ScanId;v=1;d1=13906.13906.2	hcd	0	0	0	0	5.3e-19	7.3e-19	FTMS + c NSI d Full ms2 1127.0931@hcd30.00 [120.0000-2320.9021]
73 | 389	1	132	K.EMIFEDTNLK.L			1e-06	1.4e-06	5.99	502.9	468.4	468.4	2	620.3	620.3	0.21		1239.59	1239.59	Specific		>sp|P18031|PTN1_HUMAN Tyrosine-protein phosphatase non-receptor type 1 OS=Homo sapiens OX=9606 GN=PTPN1 PE=1 SV=1	1	20.7637	controllerType=0 controllerNumber=1 scan=11510		20240605_bodo_mlh01_dmlv038_10.ScanId;v=1;d1=11510.11510.2	hcd	0	0	0	0	1e-07	1.4e-07	FTMS + c NSI d Full ms2 620.3011@hcd30.00 [120.0000-1287.0464]
74 | 1513	1	293	K.ELSHEDLEPPPEHIPPPPRPPKR.I			1.9e-21	2.6e-21	20.72	1226.9	1226.9	1226.9	3	888.803	888.801	1.68		2664.39	2664.39	Specific		>sp|P18031|PTN1_HUMAN Tyrosine-protein phosphatase non-receptor type 1 OS=Homo sapiens OX=9606 GN=PTPN1 PE=1 SV=1	1	18.4351	controllerType=0 controllerNumber=1 scan=9166		20240605_bodo_mlh01_dmlv038_10.ScanId;v=1;d1=9166.9166.3	hcd	0	0	0	0	8.7e-22	1.2e-21	FTMS + c NSI d Full ms2 888.8030@hcd30.00 [120.0000-2742.1851]
75 | 1207	1	293	K.ELSHEDLEPPPEHIPPPPRPPK.R			1.4e-16	1.9e-16	15.85	1008.8	989.3	989.3	3	836.77	836.768	3.33		2508.3	2508.29	Specific		>sp|P18031|PTN1_HUMAN Tyrosine-protein phosphatase non-receptor type 1 OS=Homo sapiens OX=9606 GN=PTPN1 PE=1 SV=1	1	18.5235	controllerType=0 controllerNumber=1 scan=9266		20240605_bodo_mlh01_dmlv038_10.ScanId;v=1;d1=9266.9266.3	hcd	0	0	0	0	1.7e-17	2.3e-17	FTMS + c NSI d Full ms2 837.1042@hcd30.00 [120.0000-2583.9868]
76 | 2069	1	6	K.EFEQIDKSGSWAAIYQDIRHEASDFPC[+57.02146]R.V			9.1e-19	1.2e-18	18.04	1194.1	1194.1	1194.1	4	839.644	839.641	2.7		3355.55	3355.54	Specific		>sp|P18031|PTN1_HUMAN Tyrosine-protein phosphatase non-receptor type 1 OS=Homo sapiens OX=9606 GN=PTPN1 PE=1 SV=1	1	23.2	controllerType=0 controllerNumber=1 scan=13858	C27(Carbamidomethyl / 57.0215)	20240605_bodo_mlh01_dmlv038_10.ScanId;v=1;d1=13858.13858.4	hcd	0	0	0	0	1.4e-19	1.9e-19	FTMS + c NSI d Full ms2 840.1442@hcd30.00 [120.0000-3451.0522]
77 | 286	1	6	K.EFEQIDK.S			3.4e-05	4.6e-05	4.47	440.8	436.2	436.2	2	454.722	454.722	1.25		908.437	908.436	Specific		>sp|P18031|PTN1_HUMAN Tyrosine-protein phosphatase non-receptor type 1 OS=Homo sapiens OX=9606 GN=PTPN1 PE=1 SV=1	1	17.2103	controllerType=0 controllerNumber=1 scan=7955		20240605_bodo_mlh01_dmlv038_10.ScanId;v=1;d1=7955.7955.3	hcd	0	0	0	0	1.8e-06	2.5e-06	FTMS + c NSI d Full ms2 454.2221@hcd30.00 [120.0000-1412.3677]
78 | 878	1	336	K.EETQEDKDC[+57.02146]PIKEEK.G			1.3e-16	1.8e-16	15.89	1007.8	527.8	527.8	2	939.426	939.425	0.76		1877.84	1877.84	Specific		>sp|P18031|PTN1_HUMAN Tyrosine-protein phosphatase non-receptor type 1 OS=Homo sapiens OX=9606 GN=PTPN1 PE=1 SV=1	1	15.3959	controllerType=0 controllerNumber=1 scan=6074	C9(Carbamidomethyl / 57.0215)	20240605_bodo_mlh01_dmlv038_10.ScanId;v=1;d1=6074.6074.2	hcd	0	0	0	0	1.5e-17	2.1e-17	FTMS + c NSI d Full ms2 939.4259@hcd30.00 [120.0000-1938.0609]
79 | 463	1	336	K.EETQEDKDC[+57.02146]PIK.E			3.5e-13	4.8e-13	12.45	868.9	539.3	539.3	2	746.335	746.335	0.31		1491.66	1491.66	Specific		>sp|P18031|PTN1_HUMAN Tyrosine-protein phosphatase non-receptor type 1 OS=Homo sapiens OX=9606 GN=PTPN1 PE=1 SV=1	1	15.5362	controllerType=0 controllerNumber=1 scan=6224	C9(Carbamidomethyl / 57.0215)	20240605_bodo_mlh01_dmlv038_10.ScanId;v=1;d1=6224.6224.2	hcd	0	0	0	0	4.5e-14	6.2e-14	FTMS + c NSI d Full ms2 746.3365@hcd30.00 [120.0000-1544.1584]
80 | 632	1	129	K.EEKEM[+15.99492]IFEDTNLK.L	M5(Oxidation / 15.9949)		4e-12	5.5e-12	11.4	844	636.5	636.5	2	821.39	821.388	2.82		1641.77	1641.77	Specific		>sp|P18031|PTN1_HUMAN Tyrosine-protein phosphatase non-receptor type 1 OS=Homo sapiens OX=9606 GN=PTPN1 PE=1 SV=1	1	19.2338	controllerType=0 controllerNumber=1 scan=9980		20240605_bodo_mlh01_dmlv038_10.ScanId;v=1;d1=9980.9980.2	hcd	0	0	0	0	3.8e-13	5.2e-13	FTMS + c NSI d Full ms2 821.8913@hcd30.00 [120.0000-1698.2902]
81 | 1703	1	129	K.EEKEMIFEDTNLKLTLISEDIK.S			3.1e-10	4.2e-10	9.51	658.4	658.4	658.4	4	660.346	660.344	3.36		2638.36	2638.35	Specific		>sp|P18031|PTN1_HUMAN Tyrosine-protein phosphatase non-receptor type 1 OS=Homo sapiens OX=9606 GN=PTPN1 PE=1 SV=1	1	22.7623	controllerType=0 controllerNumber=1 scan=13510		20240605_bodo_mlh01_dmlv038_10.ScanId;v=1;d1=13510.13510.4	hcd	0	0	0	0	2.1e-11	2.8e-11	FTMS + c NSI d Full ms2 660.5955@hcd30.00 [120.0000-2718.4937]
82 | 698	1	129	K.EEKEMIFEDTNLK.L			3.3e-13	4.5e-13	12.48	811.8	684.9	684.9	2	813.392	813.39	2.35		1625.78	1625.77	Specific		>sp|P18031|PTN1_HUMAN Tyrosine-protein phosphatase non-receptor type 1 OS=Homo sapiens OX=9606 GN=PTPN1 PE=1 SV=1	1	20.133	controllerType=0 controllerNumber=1 scan=10896		20240605_bodo_mlh01_dmlv038_10.ScanId;v=1;d1=10896.10896.2	hcd	0	0	0	0	4.1e-14	5.6e-14	FTMS + c NSI d Full ms2 813.8925@hcd30.00 [120.0000-1681.9725]
83 | 1036	1	240	K.DPSSVDIKKVLLEMR.K			6.1e-11	8.3e-11	10.22	712.6	712.6	712.6	3	577.324	577.322	4.24		1729.96	1729.95	Specific		>sp|P18031|PTN1_HUMAN Tyrosine-protein phosphatase non-receptor type 1 OS=Homo sapiens OX=9606 GN=PTPN1 PE=1 SV=1	1	22.1336	controllerType=0 controllerNumber=1 scan=12918		20240605_bodo_mlh01_dmlv038_10.ScanId;v=1;d1=12918.12918.3	hcd	0	0	0	0	3.2e-12	4.4e-12	FTMS + c NSI d Full ms2 577.3243@hcd30.00 [120.0000-1789.0603]
84 | 106	1	240	K.DPSSVDIKK.V			1.6e-05	2.2e-05	4.8	557.4	403.6	403.6	2	494.77	494.769	2.14		988.533	988.531	Specific		>sp|P18031|PTN1_HUMAN Tyrosine-protein phosphatase non-receptor type 1 OS=Homo sapiens OX=9606 GN=PTPN1 PE=1 SV=1	1	15.2773	controllerType=0 controllerNumber=1 scan=5946		20240605_bodo_mlh01_dmlv038_10.ScanId;v=1;d1=5946.5946.2	hcd	0	0	0	0	9.2e-07	1.3e-06	FTMS + c NSI d Full ms2 494.7701@hcd30.00 [120.0000-1030.9629]
85 | 31	1	240	K.DPSSVDIK.K			1.9e-06	2.6e-06	5.72	459.5	459.5	459.5	2	430.722	430.722	1.6		860.437	860.436	Specific		>sp|P18031|PTN1_HUMAN Tyrosine-protein phosphatase non-receptor type 1 OS=Homo sapiens OX=9606 GN=PTPN1 PE=1 SV=1	1	16.387	controllerType=0 controllerNumber=1 scan=7119		20240605_bodo_mlh01_dmlv038_10.ScanId;v=1;d1=7119.7119.2	hcd	0	0	0	0	1.6e-07	2.2e-07	FTMS + c NSI d Full ms2 430.7225@hcd30.00 [120.0000-900.3058]
86 | 103	1	343	K.DC[+57.02146]PIKEEK.G			1.8e-05	2.5e-05	4.74	559	406.5	406.5	2	509.748	509.747	1.48		1018.49	1018.49	Specific		>sp|P18031|PTN1_HUMAN Tyrosine-protein phosphatase non-receptor type 1 OS=Homo sapiens OX=9606 GN=PTPN1 PE=1 SV=1	1	15.2755	controllerType=0 controllerNumber=1 scan=5943	C2(Carbamidomethyl / 57.0215)	20240605_bodo_mlh01_dmlv038_10.ScanId;v=1;d1=5943.5943.2	hcd	0	0	0	0	1.1e-06	1.5e-06	FTMS + c NSI d Full ms2 509.7481@hcd30.00 [120.0000-1061.5182]
87 | 682	1	324	K.C[+57.02146]REFFPNHQWVK.E			3.3e-10	4.5e-10	9.48	686.9	646.1	646.1	3	549.934	549.933	2.37		1647.79	1647.78	Specific		>sp|P18031|PTN1_HUMAN Tyrosine-protein phosphatase non-receptor type 1 OS=Homo sapiens OX=9606 GN=PTPN1 PE=1 SV=1	1	19.9097	controllerType=0 controllerNumber=1 scan=10649	C1(Carbamidomethyl / 57.0215)	20240605_bodo_mlh01_dmlv038_10.ScanId;v=1;d1=10649.10649.3	hcd	0	0	0	0	2.7e-11	3.6e-11	FTMS + c NSI d Full ms2 549.9344@hcd30.00 [120.0000-1705.2474]
88 | 1541	1	121	K.C[+57.02146]AQYWPQKEEKEM[+15.99492]IFEDTNLK.L	M13(Oxidation / 15.9949)		1.2e-15	1.7e-15	14.9	918.8	915.6	915.6	4	676.567	676.566	1.8		2703.25	2703.24	Specific		>sp|P18031|PTN1_HUMAN Tyrosine-protein phosphatase non-receptor type 1 OS=Homo sapiens OX=9606 GN=PTPN1 PE=1 SV=1	1	20.2962	controllerType=0 controllerNumber=1 scan=11063	C1(Carbamidomethyl / 57.0215)	20240605_bodo_mlh01_dmlv038_10.ScanId;v=1;d1=11063.11063.4	hcd	0	0	0	0	7.5e-17	1e-16	FTMS + c NSI d Full ms2 676.5670@hcd30.00 [120.0000-2783.6570]
89 | 1576	1	121	K.C[+57.02146]AQYWPQKEEKEMIFEDTNLK.L			3e-17	4.1e-17	16.52	1047	1029.1	1029.1	3	896.422	896.421	1.38		2687.25	2687.25	Specific		>sp|P18031|PTN1_HUMAN Tyrosine-protein phosphatase non-receptor type 1 OS=Homo sapiens OX=9606 GN=PTPN1 PE=1 SV=1	1	20.9999	controllerType=0 controllerNumber=1 scan=11772	C1(Carbamidomethyl / 57.0215)	20240605_bodo_mlh01_dmlv038_10.ScanId;v=1;d1=11772.11772.3	hcd	0	0	0	0	4e-18	5.5e-18	FTMS + c NSI d Full ms2 896.7560@hcd30.00 [120.0000-2766.5215]
90 | 530	1	121	K.C[+57.02146]AQYWPQKEEK.E			1.1e-12	1.5e-12	11.95	830.5	618.3	618.3	2	733.842	733.84	1.74		1466.68	1466.67	Specific		>sp|P18031|PTN1_HUMAN Tyrosine-protein phosphatase non-receptor type 1 OS=Homo sapiens OX=9606 GN=PTPN1 PE=1 SV=1	1	17.4333	controllerType=0 controllerNumber=1 scan=8153	C1(Carbamidomethyl / 57.0215)	20240605_bodo_mlh01_dmlv038_10.ScanId;v=1;d1=8153.8153.2	hcd	0	0	0	0	8.4e-14	1.2e-13	FTMS + c NSI d Full ms2 733.8416@hcd30.00 [120.0000-1518.6689]
91 | 336	1	121	K.C[+57.02146]AQYWPQK.E			1.2e-08	1.7e-08	7.9	646	567.8	567.8	2	540.751	540.75	1.66		1080.49	1080.49	Specific		>sp|P18031|PTN1_HUMAN Tyrosine-protein phosphatase non-receptor type 1 OS=Homo sapiens OX=9606 GN=PTPN1 PE=1 SV=1	1	18.1616	controllerType=0 controllerNumber=1 scan=8883	C1(Carbamidomethyl / 57.0215)	20240605_bodo_mlh01_dmlv038_10.ScanId;v=1;d1=8883.8883.2	hcd	0	0	0	0	5.4e-10	7.4e-10	FTMS + c NSI d Full ms2 540.7514@hcd30.00 [120.0000-1124.7649]
