# Supplementary material for: Protein tyrosine phosphatase inactivation by electrophilic tyrosine modification
Source: Chem Sci. 2026 Jan 19;17(10):5163–71. doi: 10.1039/d5sc07398g (PMC12814959; doi:10.1039/d5sc07398g)
Supplement: SC-017-D5SC07398G-s004 [file SC-017-D5SC07398G-s004.xlsx]

## Sheet: Sheet1
	%PTP Activity						%PTP Activity
#	SHP1	SHP2	LYP	PTP1B		#	SHP1	SHP2	LYP	PTP1B
58	30.93	3.67	31.19	33.47		63	96.58	98.86	103.09	97.28
44	2.55	4.43	1.79	8.66		9	97.52	99.02	95.22	35.1
59	14.68	6.29	12.03	43.34		72	95.94	99.11	100.48	96.46
6	59.27	22.87	37.31	80.2		13	101.8	99.14	99.92	101.88
93	64.27	30.32	68.79	84.98		87	100.4	99.82	100.34	97.27
11	48.1	35.49	71.67	59.95		24	95.76	100.12	99.64	94.22
5	79.57	47.99	71.35	87.51		89	97.83	100.14	101.57	103.49
29	72.48	49.64	74.28	63.82		14	97.56	100.21	105.2	99.64
2	74.96	52.45	89.51	73.15		30	94.88	100.43	103.22	96.61
53	80.08	54.49	92.3	84.8		73	102.74	100.7	99.87	98.61
39	84.39	62.93	88.53	92.64		82	100.98	100.79	103.11	105.15
31	88.55	66.71	93.57	93.09		22	100.14	100.89	99.21	105.69
10	91.15	76.49	96.15	95.39		91	98.13	101.15	103.9	91.52
34	89.46	82.98	98.17	91.91		26	99.38	101.44	106.65	97.33
94	92.21	87.53	103.45	90.07		78	102.95	101.77	108.91	98.53
36	96.92	90.24	110.21	103.08		15	101.34	101.9	98.9	99.32
3	89.55	90.36	89.04	94.69		84	101.11	101.99	102.39	104.98
50	92.19	91.1	104.51	99.84		71	103.22	102.07	102.13	101.24
85	91.94	91.82	99.82	95.79		79	98.7	102.24	102.72	98.51
92	91.58	92.63	98.82	93.55		32	99.76	102.52	112.13	99.64
90	85.79	93.1	95.16	88.92		33	112.79	102.74	112.04	106.09
8	92.98	93.76	94.63	93.14		80	102.51	102.78	109.73	103.04
75	91.91	95.1	94.99	98.18		27	96.88	102.81	102.3	97.81
60	88.65	95.4	98.19	91.13		4	100	103.17	110.7	103.65
76	92.97	95.79	97.87	93.13		74	98.66	103.53	105.47	103.79
12	95.26	95.92	94.95	90.82		86	90.55	103.53	98.99	97.97
23	95.13	97.45	101	94.62		55	100.13	104.34	105.36	98.76
64	100.88	97.47	108.41	99.68		41	106.83	104.66	108.89	108.38
83	99.95	97.53	107.1	105.55		54	102.11	104.86	102.5	101.39
61	96.06	97.91	100.23	97.97		20	104.41	104.92	112.2	104.73
62	97.85	97.93	107.33	94.25		25	108.53	105	103.93	103.5
28	92.5	98.11	98.51	93.89		18	106.76	105.12	114.58	103.29
56	91.24	98.11	100.05	94.13		38	105.14	108.21	104.45	107.31
88	91.99	98.13	98.33	92.07		37	105.12	108.7	106.56	108.29
77	95.1	98.57	98.62	96.47		17	112.36	111	111.93	109.74
81	106.9	105.51	109.66	108.86		1	110.26	107.59	106.08	103.69
19	106.84	107.07	106.85	106.23
