# Supplementary material for: Protein tyrosine phosphatase inactivation by electrophilic tyrosine modification
Source: Chem Sci. 2026 Jan 19;17(10):5163–71. doi: 10.1039/d5sc07398g (PMC12814959; doi:10.1039/d5sc07398g)
Supplement: SC-017-D5SC07398G-s005 [file SC-017-D5SC07398G-s005.xlsx]

## Sheet: Sheet1
Fitness list for DML189 docked with SHP2 at Y279
#	Score	DG	S(hbond)	S(cho)	S(metal)	S(lipo)	H(rot)	DE(clash)	DE(int)	intcor	time
2	27.18	-28.2	3.96	1	0	85.85	1	0.77	0.25	2.29	1
9	23.77	-24.12	5.31	0	0	29.56	1	0.01	0.34	2.29	1
8	23.46	-24.3	2.83	1	0	84.87	1	0.08	0.76	2.29	1
7	23.39	-23.68	5.22	0	0	28.46	1	0.01	0.28	2.29	1
10	23.39	-23.94	4.31	0	0	56.56	1	0.14	0.41	2.29	1
3	23.25	-23.96	4.71	0	0	45.34	1	0.04	0.67	2.29	1
1	23.24	-23.52	5.18	0	0	28.23	1	0.01	0.28	2.29	0
5	21.51	-23.39	2.89	0.88	0	77.33	1	0.12	1.76	2.29	1
6	20.58	-21.08	2.71	1	0	60.78	1	0.02	0.48	2.29	1
4	17.28	-20.51	2.32	0	0	84.13	1	2.79	0.44	2.29	1
