# Supplementary material for: Protein tyrosine phosphatase inactivation by electrophilic tyrosine modification
Source: Chem Sci. 2026 Jan 19;17(10):5163–71. doi: 10.1039/d5sc07398g (PMC12814959; doi:10.1039/d5sc07398g)
Supplement: SC-017-D5SC07398G-s006 [file SC-017-D5SC07398G-s006.xlsx]

## Sheet: Table S4 (Non-Reducing)
SHP2, DML189, EThcD				Injection 1																SHP2, DML189, EThcD
PID	Prot._x000D_ Rank	Pos.	Sequence_x000D_ (unformatted)	Mods_x000D_ (variable)	Glycans	PEP_x000D_ 2D	PEP_x000D_ 1D	|Log Prob|	Score	Delta_x000D_ Score	Delta Mod._x000D_ Score	z	Obs._x000D_ m/z	Calc._x000D_ m/z	ppm_x000D_ err.	Off-_x000D_ By-X	Obs._x000D_ MH	Calc._x000D_ MH	Cleavage	Glycans_x000D_ Pos.	Protein_x000D_ Name	Prot._x000D_ Id	Scan_x000D_ Time	Scan #	Mods_x000D_ (fixed)	Comment	Fragment_x000D_ Type	FDR_x000D_ 2D	FDR_x000D_ 1D	FDR uniq._x000D_ 2D	FDR uniq._x000D_ 1D	q-value_x000D_ 2D	q-value_x000D_ 1D	Scan info	MobilityValue	Xlink Partner Peptide_x000D_ Sequence	Xlink Base Peptide_x000D_ Xlink Pos. in Protein	Xlink Partner Peptide_x000D_ Protein Name	Xlink Partner Peptide_x000D_ Xlink Pos. in Protein	Xlink Score	XlinkPartnerPeptideSequenceUnformatted
1 | 24	1	13	K.LAETTDKVK.Q			0.0015	0.0016	2.82	302	302	302	2	502.785	502.785	0.05		1004.56	1004.56	Specific		>sp|SHP2Ca|SHP2 Catalytic (224-528)	1	17.1135	controllerType=0 controllerNumber=1 scan=2958		20231205_vapa_xj04_mlwiii153_d.ScanId;v=1;d1=2958.2958.2	ethcd	0	0	0	0	0.00015	0.00016	FTMS + c NSI d sa Full ms2 502.7852@etd123.41 502.7852@hcd35.00 [120.0000-1016.0000]
2 | 1187	1	22	K.QGFWEEFETLQQQEC[+2022.96153]K.L	C15(Disulfide / 2022.9615)		2.7e-05	2.9e-05	4.56	458.3	426.3	426.3	5	811.378	811.377	0.77		4052.86	4052.86	Specific		>sp|SHP2Ca|SHP2 Catalytic (224-528)	1	23.1395	controllerType=0 controllerNumber=1 scan=4550		20231205_vapa_xj04_mlwiii153_d.ScanId;v=1;d1=4550.4550.5	ethcd	0	0	0	0	3.1e-06	3.3e-06	FTMS + c NSI d sa Full ms2 811.7799@etd19.75 811.7799@hcd35.00 [120.0000-2000.0000]		K.QESIMDAGPVVVHCSAGIGR.T	36	(self)	240	454.5
3 | 1142	1	22	K.QGFWEEFETLQQQEC[+1314.61257]K.L	C15(Disulfide / 1314.6126)		3.8e-05	4.1e-05	4.42	425.1	384	384	5	669.708	669.707	0.76		3344.51	3344.51	Specific		>sp|SHP2Ca|SHP2 Catalytic (224-528)	1	22.698	controllerType=0 controllerNumber=1 scan=4397		20231205_vapa_xj04_mlwiii153_d.ScanId;v=1;d1=4397.4397.5	ethcd	0	0	0	0	4.2e-06	4.5e-06	FTMS + c NSI d sa Full ms2 670.1088@etd19.75 670.1088@hcd35.00 [120.0000-2000.0000]		R.EKGVDCDIDVPK.T	36	(self)	267	166.3
4 | 1080	1	22	K.QGFWEEFETLQQQEC[+787.36467]K.L	C15(Disulfide / 787.3647)		1.6e-05	1.7e-05	4.8	557.8	523.9	523.9	5	564.259	564.258	1.65		2817.27	2817.26	Specific		>sp|SHP2Ca|SHP2 Catalytic (224-528)	1	22.253	controllerType=0 controllerNumber=1 scan=4265		20231205_vapa_xj04_mlwiii153_d.ScanId;v=1;d1=4265.4265.5	ethcd	0	0	0	0	2.3e-06	2.4e-06	FTMS + c NSI d sa Full ms2 564.4594@etd19.75 564.4594@hcd35.00 [120.0000-2000.0000]		K.CNNSKPK.K	36	(self)	95	163.1
5 | 1122	1	22	K.QGFWEEFETLQQQEC[+562.21695]K.L	C15(Disulfide / 562.2169)		0.00059	0.00063	3.23	354.7	305.6	305.6	4	648.785	648.784	1.53		2592.12	2592.11	Specific		>sp|SHP2Ca|SHP2 Catalytic (224-528)	1	22.6304	controllerType=0 controllerNumber=1 scan=4375		20231205_vapa_xj04_mlwiii153_d.ScanId;v=1;d1=4375.4375.4	ethcd	0	0	0	0	4.9e-05	5.3e-05	FTMS + c NSI d sa Full ms2 649.0355@etd30.85 649.0355@hcd35.00 [120.0000-2000.0000]		K.CNNSK.P	36	(self)	95	111.5
6 | 505	1	22	K.QGFWEEFETLQQQEC[+57.02146]K.L	C15(Carbamidomethyl / 57.0215)		8.2e-14	8.9e-14	13.08	863	858.2	623.8	3	696.312	696.311	1.87		2086.92	2086.92	Specific		>sp|SHP2Ca|SHP2 Catalytic (224-528)	1	23.5413	controllerType=0 controllerNumber=1 scan=4685		20231205_vapa_xj04_mlwiii153_d.ScanId;v=1;d1=4685.4685.3	ethcd	0	0	0	0	1.6e-14	1.7e-14	FTMS + c NSI d sa Full ms2 696.6458@etd54.85 696.6458@hcd35.00 [120.0000-2000.0000]
7 | 320	1	58	K.NILPFDHTR.V			5.2e-06	5.6e-06	5.29	464.5	464.5	464.5	2	556.797	556.796	1.03		1112.59	1112.58	Specific		>sp|SHP2Ca|SHP2 Catalytic (224-528)	1	20.649	controllerType=0 controllerNumber=1 scan=3761		20231205_vapa_xj04_mlwiii153_d.ScanId;v=1;d1=3761.3761.2	ethcd	0	0	0	0	6.2e-07	6.7e-07	FTMS + c NSI d sa Full ms2 557.7990@etd123.41 557.7990@hcd35.00 [120.0000-1126.0000]
8 | 1134	1	67	R.VVLHDGDPNEPVSDYINANIIM[+15.99492]PEFETK.C	M22(Oxidation / 15.9949)		6.7e-09	7.2e-09	8.18	623.1	623.1	623.1	3	1058.18	1058.18	0.81		3172.52	3172.51	Specific		>sp|SHP2Ca|SHP2 Catalytic (224-528)	1	22.6487	controllerType=0 controllerNumber=1 scan=4381		20231205_vapa_xj04_mlwiii153_d.ScanId;v=1;d1=4381.4381.3	ethcd	0	0	0	0	4.3e-10	4.6e-10	FTMS + c NSI d sa Full ms2 1058.5125@etd54.85 1058.5125@hcd35.00 [120.0000-2000.0000]
9 | 1247	1	67	R.VVLHDGDPNEPVSDYINANIIMPEFETK.C			1.8e-12	2e-12	11.74	834.3	834.3	834.3	3	1052.85	1052.84	2.18		3156.53	3156.52	Specific		>sp|SHP2Ca|SHP2 Catalytic (224-528)	1	23.2996	controllerType=0 controllerNumber=1 scan=4604		20231205_vapa_xj04_mlwiii153_d.ScanId;v=1;d1=4604.4604.3	ethcd	0	0	0	0	2.7e-13	2.9e-13	FTMS + c NSI d sa Full ms2 1053.1802@etd54.85 1053.1802@hcd35.00 [120.0000-2000.0000]
10 | 30	1	95	K.C[+1314.61257]NNSKPK.K	C1(Disulfide / 1314.6126)		0.00062	0.00067	3.21	425.6	338.1	338.1	4	527.006	527.005	0.15		2105	2105	Specific		>sp|SHP2Ca|SHP2 Catalytic (224-528)	1	17.3422	controllerType=0 controllerNumber=1 scan=3006		20231205_vapa_xj04_mlwiii153_d.ScanId;v=1;d1=3006.3006.4	ethcd	0	0	0	0	5.9e-05	6.4e-05	FTMS + c NSI d sa Full ms2 527.2562@etd30.85 527.2562@hcd35.00 [120.0000-2000.0000]		R.EKGVDCDIDVPK.T	95	(self)	267	231.2
11 | 425	1	103	K.SYIATQGC[+346.16748]LQNTVNDFWR.M	C8(Disulfide / 346.1675)		1.4e-10	1.5e-10	9.86	787.9	743.9	743.9	4	616.296	616.295	1.7		2462.16	2462.16	Specific		>sp|SHP2Ca|SHP2 Catalytic (224-528)	1	21.6809	controllerType=0 controllerNumber=1 scan=4063		20231205_vapa_xj04_mlwiii153_d.ScanId;v=1;d1=4063.4063.4	ethcd	0	0	0	0	1.8e-11	2e-11	FTMS + c NSI d sa Full ms2 616.5464@etd30.85 616.5464@hcd35.00 [120.0000-2000.0000]		K.CVK.Y	110	(self)	144	91.7
12 | 88	1	121	R.M[+15.99492]VFQENSR.V	M1(Oxidation / 15.9949)		0.00052	0.00056	3.28	413.1	245	245	2	513.738	513.737	0.98		1026.47	1026.47	Specific		>sp|SHP2Ca|SHP2 Catalytic (224-528)	1	17.6105	controllerType=0 controllerNumber=1 scan=3073		20231205_vapa_xj04_mlwiii153_d.ScanId;v=1;d1=3073.3073.2	ethcd	0	0	0	0	4e-05	4.3e-05	FTMS + c NSI d sa Full ms2 513.7371@etd123.41 513.7371@hcd35.00 [120.0000-1038.0000]
13 | 155	1	121	R.MVFQENSR.V			6.2e-05	6.7e-05	4.2	420.2	298.4	298.4	2	505.74	505.74	1.34		1010.47	1010.47	Specific		>sp|SHP2Ca|SHP2 Catalytic (224-528)	1	18.5857	controllerType=0 controllerNumber=1 scan=3281		20231205_vapa_xj04_mlwiii153_d.ScanId;v=1;d1=3281.3281.2	ethcd	0	0	0	0	5.9e-06	6.4e-06	FTMS + c NSI d sa Full ms2 505.7402@etd123.41 505.7402@hcd35.00 [120.0000-1022.0000]
14 | 393	1	147	K.YWPDEYALK.E			5e-08	5.4e-08	7.3	647.5	479.1	479.1	2	592.787	592.785	3.03		1184.57	1184.56	Specific		>sp|SHP2Ca|SHP2 Catalytic (224-528)	1	21.4218	controllerType=0 controllerNumber=1 scan=3960		20231205_vapa_xj04_mlwiii153_d.ScanId;v=1;d1=3960.3960.2	ethcd	0	0	0	0	5.3e-09	5.7e-09	FTMS + c NSI d sa Full ms2 592.7855@etd123.41 592.7855@hcd35.00 [120.0000-1196.0000]
15 | 116	1	167	K.ESAAHDYTLR.E			1.5e-09	1.6e-09	8.83	701.2	701.2	701.2	2	581.779	581.778	1.91		1162.55	1162.55	Specific		>sp|SHP2Ca|SHP2 Catalytic (224-528)	1	17.8015	controllerType=0 controllerNumber=1 scan=3115		20231205_vapa_xj04_mlwiii153_d.ScanId;v=1;d1=3115.3115.2	ethcd	0	0	0	0	1.3e-10	1.4e-10	FTMS + c NSI d sa Full ms2 581.7787@etd123.41 581.7787@hcd35.00 [120.0000-1174.0000]
16 | 324	1	195	R.TVWQYHFR.T			6.2e-05	6.7e-05	4.21	504.2	341.5	341.5	2	568.786	568.785	0.69		1136.56	1136.56	Specific		>sp|SHP2Ca|SHP2 Catalytic (224-528)	1	20.7118	controllerType=0 controllerNumber=1 scan=3779		20231205_vapa_xj04_mlwiii153_d.ScanId;v=1;d1=3779.3779.2	ethcd	0	0	0	0	5.3e-06	5.7e-06	FTMS + c NSI d sa Full ms2 568.7863@etd123.41 568.7863@hcd35.00 [120.0000-1148.0000]
17 | 1244	1	203	R.TWPDHGVPSDPGGVLDFLEEVHHK.Q			8.1e-19	8.7e-19	18.09	1177.7	1177.7	1177.7	4	667.827	667.825	2.01		2668.28	2668.28	Specific		>sp|SHP2Ca|SHP2 Catalytic (224-528)	1	23.288	controllerType=0 controllerNumber=1 scan=4600		20231205_vapa_xj04_mlwiii153_d.ScanId;v=1;d1=4600.4600.4	ethcd	0	0	0	0	4.8e-19	5.2e-19	FTMS + c NSI d sa Full ms2 668.0768@etd30.85 668.0768@hcd35.00 [120.0000-2000.0000]
18 | 265	1	227	K.QESIM[+15.99492]DAGPVVVHC[+57.02146]SAGIGR.T	M5(Oxidation / 15.9949); C14(Carbamidomethyl / 57.0215)		1e-10	1.1e-10	9.98	746.7	746.7	593.8	3	700.34	700.338	1.67		2099	2099	Specific		>sp|SHP2Ca|SHP2 Catalytic (224-528)	1	19.6583	controllerType=0 controllerNumber=1 scan=3524		20231205_vapa_xj04_mlwiii153_d.ScanId;v=1;d1=3524.3524.3	ethcd	0	0	0	0	1.2e-11	1.3e-11	FTMS + c NSI d sa Full ms2 700.3385@etd54.85 700.3385@hcd35.00 [120.0000-2000.0000]
19 | 355	1	227	K.QESIMDAGPVVVHC[+57.02146]SAGIGR.T	C14(Carbamidomethyl / 57.0215)		6.1e-14	6.6e-14	13.21	859.5	859.5	696.9	3	695.008	695.007	1.11		2083.01	2083.01	Specific		>sp|SHP2Ca|SHP2 Catalytic (224-528)	1	20.8782	controllerType=0 controllerNumber=1 scan=3822		20231205_vapa_xj04_mlwiii153_d.ScanId;v=1;d1=3822.3822.3	ethcd	0	0	0	0	9.9e-15	1.1e-14	FTMS + c NSI d sa Full ms2 695.0075@etd54.85 695.0075@hcd35.00 [120.0000-2000.0000]
20 | 578	1	247	R.TGTFIVIDILIDIIREK.G			2.1e-05	2.3e-05	4.68	532.5	532.5	532.5	3	653.724	653.722	1.92		1959.16	1959.15	Specific		>sp|SHP2Ca|SHP2 Catalytic (224-528)	1	28.1064	controllerType=0 controllerNumber=1 scan=5684		20231205_vapa_xj04_mlwiii153_d.ScanId;v=1;d1=5684.5684.3	ethcd	0	0	0	0	2.5e-06	2.7e-06	FTMS + c NSI d sa Full ms2 654.0580@etd54.85 654.0580@hcd35.00 [120.0000-1973.0000]
21 | 592	1	247	R.TGTFIVIDILIDIIR.E			4.8e-14	5.2e-14	13.32	888.4	829.3	829.3	3	568.01	568.01	0.96		1702.02	1702.01	Specific		>sp|SHP2Ca|SHP2 Catalytic (224-528)	1	28.755	controllerType=0 controllerNumber=1 scan=5805		20231205_vapa_xj04_mlwiii153_d.ScanId;v=1;d1=5805.5805.3	ethcd	0	0	0	0	4.8e-15	5.2e-15	FTMS + c NSI d sa Full ms2 568.0106@etd54.85 568.0106@hcd35.00 [120.0000-1715.0000]
22 | 149	1	262	R.EKGVDC[+57.02146]DIDVPK.T	C6(Carbamidomethyl / 57.0215)		3.2e-07	3.5e-07	6.49	612.7	612.7	197.5	2	687.833	687.832	0.94		1374.66	1374.66	Specific		>sp|SHP2Ca|SHP2 Catalytic (224-528)	1	18.5256	controllerType=0 controllerNumber=1 scan=3270		20231205_vapa_xj04_mlwiii153_d.ScanId;v=1;d1=3270.3270.2	ethcd	0	0	0	0	4.9e-08	5.3e-08	FTMS + c NSI d sa Full ms2 687.8325@etd123.41 687.8325@hcd35.00 [120.0000-1386.0000]
23 | 183	1	264	K.GVDC[+57.02146]DIDVPK.T	C4(Carbamidomethyl / 57.0215)		2.9e-07	3.1e-07	6.54	537.1	466.1	135.8	2	559.264	559.263	1.25		1117.52	1117.52	Specific		>sp|SHP2Ca|SHP2 Catalytic (224-528)	1	18.9416	controllerType=0 controllerNumber=1 scan=3360		20231205_vapa_xj04_mlwiii153_d.ScanId;v=1;d1=3360.3360.2	ethcd	0	0	0	0	3.1e-08	3.4e-08	FTMS + c NSI d sa Full ms2 559.2646@etd123.41 559.2646@hcd35.00 [120.0000-1129.0000]
24 | 59	1	283	R.SGM[+15.99492]VQTEAQYR.F	M3(Oxidation / 15.9949)		0.00018	0.00019	3.75	359.5	311.9	311.9	2	643.297	643.296	1.54		1285.59	1285.58	Specific		>sp|SHP2Ca|SHP2 Catalytic (224-528)	1	17.4934	controllerType=0 controllerNumber=1 scan=3043		20231205_vapa_xj04_mlwiii153_d.ScanId;v=1;d1=3043.3043.2	ethcd	0	0	0	0	2.2e-05	2.3e-05	FTMS + c NSI d sa Full ms2 643.2966@etd123.41 643.2966@hcd35.00 [120.0000-1297.0000]
25 | 137	1	283	R.SGMVQTEAQYR.F			2e-07	2.1e-07	6.71	572.9	486.9	486.9	2	635.299	635.298	1.02		1269.59	1269.59	Specific		>sp|SHP2Ca|SHP2 Catalytic (224-528)	1	18.0642	controllerType=0 controllerNumber=1 scan=3173		20231205_vapa_xj04_mlwiii153_d.ScanId;v=1;d1=3173.3173.2	ethcd	0	0	0	0	2e-08	2.1e-08	FTMS + c NSI d sa Full ms2 636.3003@etd123.41 636.3003@hcd35.00 [120.0000-1283.0000]
SHP2, DML189, EThcD				Injection 2																SHP2, DML189, EThcD
PID	Prot._x000D_ Rank	Pos.	Sequence_x000D_ (unformatted)	Mods_x000D_ (variable)	Glycans	PEP_x000D_ 2D	PEP_x000D_ 1D	|Log Prob|	Score	Delta_x000D_ Score	Delta Mod._x000D_ Score	z	Obs._x000D_ m/z	Calc._x000D_ m/z	ppm_x000D_ err.	Off-_x000D_ By-X	Obs._x000D_ MH	Calc._x000D_ MH	Cleavage	Glycans_x000D_ Pos.	Protein_x000D_ Name	Prot._x000D_ Id	Scan_x000D_ Time	Scan #	Mods_x000D_ (fixed)	Comment	Fragment_x000D_ Type	FDR_x000D_ 2D	FDR_x000D_ 1D	FDR uniq._x000D_ 2D	FDR uniq._x000D_ 1D	q-value_x000D_ 2D	q-value_x000D_ 1D	Scan info	MobilityValue	Xlink Partner Peptide_x000D_ Sequence	Xlink Base Peptide_x000D_ Xlink Pos. in Protein	Xlink Partner Peptide_x000D_ Protein Name	Xlink Partner Peptide_x000D_ Xlink Pos. in Protein	Xlink Score	XlinkPartnerPeptideSequenceUnformatted
1 | 384	1	22	K.QGFWEEFETLQQQEC[+1057.47501]K.L	C15(Disulfide / 1057.475)		1e-09	1e-09	8.99	700.3	651.9	651.9	4	772.599	772.598	0.73		3087.37	3087.37	Specific		>sp|SHP2Ca|SHP2 Catalytic (224-528)	1	22.8165	controllerType=0 controllerNumber=1 scan=4277		20250502_vapa_xj08_mlwvi5_shp2_dml189_ethcd_01.ScanId;v=1;d1=4277.4277.4	ethcd	0	0	0	0	1.3e-10	1.3e-10	FTMS + c NSI d sa Full ms2 772.8516@etd57.77 772.8516@hcd30.00 [120.0000-2000.0000]		K.GVDCDIDVPK.T	36	(self)	267	154.3
2 | 295	1	22	K.QGFWEEFETLQQQEC[+562.21695]K.L	C15(Disulfide / 562.2169)		2e-08	2.1e-08	7.69	625.2	538.1	538.1	3	864.711	864.709	1.51		2592.12	2592.11	Specific		>sp|SHP2Ca|SHP2 Catalytic (224-528)	1	22.2983	controllerType=0 controllerNumber=1 scan=4130		20250502_vapa_xj08_mlwvi5_shp2_dml189_ethcd_01.ScanId;v=1;d1=4130.4130.3	ethcd	0	0	0	0	1.3e-09	1.4e-09	FTMS + c NSI d sa Full ms2 865.0461@etd102.69 865.0461@hcd30.00 [120.0000-2000.0000]		K.CNNSK.P	36	(self)	95	123.2
3 | 323	1	22	K.QGFWEEFETLQQQEC[+346.16748]K.L	C15(Disulfide / 346.1675)		1.4e-06	1.4e-06	5.85	529.2	478.4	478.4	4	594.772	594.771	1.42		2376.07	2376.06	Specific		>sp|SHP2Ca|SHP2 Catalytic (224-528)	1	22.4287	controllerType=0 controllerNumber=1 scan=4169		20250502_vapa_xj08_mlwvi5_shp2_dml189_ethcd_01.ScanId;v=1;d1=4169.4169.4	ethcd	0	0	0	0	2.2e-07	2.3e-07	FTMS + c NSI d sa Full ms2 595.0232@etd57.77 595.0232@hcd30.00 [120.0000-2000.0000]		K.CVK.Y	36	(self)	144	81.6
4 | 452	1	22	K.QGFWEEFETLQQQEC[+57.02146]K.L	C15(Carbamidomethyl / 57.0215)		1.9e-07	2e-07	6.71	533.2	533.2	533.2	3	696.312	696.311	2.31		2086.92	2086.92	Specific		>sp|SHP2Ca|SHP2 Catalytic (224-528)	1	23.5267	controllerType=0 controllerNumber=1 scan=4486		20250502_vapa_xj08_mlwvi5_shp2_dml189_ethcd_01.ScanId;v=1;d1=4486.4486.3	ethcd	0	0	0	0	2.3e-08	2.4e-08	FTMS + c NSI d sa Full ms2 696.6467@etd102.69 696.6467@hcd30.00 [120.0000-2000.0000]
5 | 92	1	58	K.NILPFDHTR.V			8.2e-07	8.3e-07	6.09	494.7	494.7	494.7	2	556.797	556.796	1.25		1112.59	1112.58	Specific		>sp|SHP2Ca|SHP2 Catalytic (224-528)	1	20.3396	controllerType=0 controllerNumber=1 scan=3628		20250502_vapa_xj08_mlwvi5_shp2_dml189_ethcd_01.ScanId;v=1;d1=3628.3628.2	ethcd	0	0	0	0	1.1e-07	1.1e-07	FTMS + c NSI d sa Full ms2 556.7978@etd150.00 556.7978@hcd30.00 [120.0000-1124.0000]
6 | 357	1	67	R.VVLHDGDPNEPVSDYINANIIM[+15.99492]PEFETK.C	M22(Oxidation / 15.9949)		9.9e-31	1.3e-27	30.01	1490.6	1416	1416	4	793.885	793.884	1.71		3172.52	3172.51	Specific		>sp|SHP2Ca|SHP2 Catalytic (224-528)	1	22.6595	controllerType=0 controllerNumber=1 scan=4228		20250502_vapa_xj08_mlwvi5_shp2_dml189_ethcd_01.ScanId;v=1;d1=4228.4228.4	ethcd	0	0	0	0	9.9e-31	1.3e-27	FTMS + c NSI d sa Full ms2 794.3870@etd57.77 794.3870@hcd30.00 [120.0000-2000.0000]
7 | 433	1	67	R.VVLHDGDPNEPVSDYINANIIMPEFETK.C			9.9e-31	3.8e-26	30.01	1443.2	1443.2	1443.2	4	789.886	789.885	0.42		3156.52	3156.52	Specific		>sp|SHP2Ca|SHP2 Catalytic (224-528)	1	23.1568	controllerType=0 controllerNumber=1 scan=4380		20250502_vapa_xj08_mlwvi5_shp2_dml189_ethcd_01.ScanId;v=1;d1=4380.4380.4	ethcd	0	0	0	0	9.9e-31	1.9e-26	FTMS + c NSI d sa Full ms2 790.1384@etd57.77 790.1384@hcd30.00 [120.0000-2000.0000]
8 | 187	1	95	K.C[+1057.47501]NNSK.P	C1(Disulfide / 1057.475)		0.0002	0.00021	3.69	350.1	289.6	289.6	4	406.435	406.434	1.49		1622.72	1622.71	Specific		>sp|SHP2Ca|SHP2 Catalytic (224-528)	1	18.218	controllerType=0 controllerNumber=1 scan=3123		20250502_vapa_xj08_mlwvi5_shp2_dml189_ethcd_01.ScanId;v=1;d1=3123.3123.4	ethcd	0	0	0	0	1.8e-05	1.8e-05	FTMS + c NSI d sa Full ms2 406.4359@etd57.77 406.4359@hcd30.00 [120.0000-1636.0000]		K.GVDCDIDVPK.T	95	(self)	267	158.2
9 | 298	1	102	K.KSYIATQGC[+57.02146]LQNTVNDFWR.M	C9(Carbamidomethyl / 57.0215)		2.3e-10	2.4e-10	9.63	657.1	657.1	657.1	3	767.709	767.707	1.36		2301.11	2301.11	Specific		>sp|SHP2Ca|SHP2 Catalytic (224-528)	1	22.3045	controllerType=0 controllerNumber=1 scan=4131		20250502_vapa_xj08_mlwvi5_shp2_dml189_ethcd_01.ScanId;v=1;d1=4131.4131.3	ethcd	0	0	0	0	2.8e-11	2.8e-11	FTMS + c NSI d sa Full ms2 768.0443@etd102.69 768.0443@hcd30.00 [120.0000-2000.0000]
10 | 331	1	103	K.SYIATQGC[+2022.96153]LQNTVNDFWR.M	C8(Disulfide / 2022.9615)		0.0078	0.0079	2.11	490.5	73	73	5	828.597	828.596	1.25		4138.96	4138.95	Specific		>sp|SHP2Ca|SHP2 Catalytic (224-528)	1	22.5115	controllerType=0 controllerNumber=1 scan=4191		20250502_vapa_xj08_mlwvi5_shp2_dml189_ethcd_01.ScanId;v=1;d1=4191.4191.5	ethcd	0	0	0	0	0.00046	0.00047	FTMS + c NSI d sa Full ms2 828.9998@etd36.97 828.9998@hcd30.00 [120.0000-2000.0000]		K.QESIMDAGPVVVHCSAGIGR.T	110	(self)	240	500.9
11 | 261	1	103	K.SYIATQGC[+346.16748]LQNTVNDFWR.M	C8(Disulfide / 346.1675)		2.1e-08	2.1e-08	7.68	601.7	592.9	592.9	3	821.392	821.391	0.72		2462.16	2462.16	Specific		>sp|SHP2Ca|SHP2 Catalytic (224-528)	1	21.3931	controllerType=0 controllerNumber=1 scan=3892		20250502_vapa_xj08_mlwvi5_shp2_dml189_ethcd_01.ScanId;v=1;d1=3892.3892.3	ethcd	0	0	0	0	1.8e-09	1.9e-09	FTMS + c NSI d sa Full ms2 821.7273@etd102.69 821.7273@hcd30.00 [120.0000-2000.0000]		K.CVK.Y	110	(self)	144	14.6
12 | 425	1	103	K.SYIATQGC[+57.02146]LQNTVNDFWR.M	C8(Carbamidomethyl / 57.0215)		2.3e-15	2.3e-15	14.64	940.8	940.8	940.8	2	1087.01	1087.01	2		2173.02	2173.01	Specific		>sp|SHP2Ca|SHP2 Catalytic (224-528)	1	23.067	controllerType=0 controllerNumber=1 scan=4355		20250502_vapa_xj08_mlwvi5_shp2_dml189_ethcd_01.ScanId;v=1;d1=4355.4355.2	ethcd	0	0	0	0	3.4e-16	3.4e-16	FTMS + c NSI d sa Full ms2 1087.5134@etd150.00 1087.5134@hcd30.00 [120.0000-2000.0000]
13 | 35	1	121	R.M[+15.99492]VFQENSR.V	M1(Oxidation / 15.9949)		2.4e-05	2.4e-05	4.62	447.5	316.5	316.5	2	513.739	513.737	3		1026.47	1026.47	Specific		>sp|SHP2Ca|SHP2 Catalytic (224-528)	1	18.3519	controllerType=0 controllerNumber=1 scan=3163		20250502_vapa_xj08_mlwvi5_shp2_dml189_ethcd_01.ScanId;v=1;d1=3163.3163.2	ethcd	0	0	0	0	2.1e-06	2.1e-06	FTMS + c NSI d sa Full ms2 513.7383@etd150.00 513.7383@hcd30.00 [120.0000-1038.0000]
14 | 54	1	121	R.MVFQENSR.V			7.6e-06	7.7e-06	5.12	486.2	363.7	363.7	2	505.74	505.74	0.73		1010.47	1010.47	Specific		>sp|SHP2Ca|SHP2 Catalytic (224-528)	1	18.9638	controllerType=0 controllerNumber=1 scan=3309		20250502_vapa_xj08_mlwvi5_shp2_dml189_ethcd_01.ScanId;v=1;d1=3309.3309.2	ethcd	0	0	0	0	1.1e-06	1.1e-06	FTMS + c NSI d sa Full ms2 505.7409@etd150.00 505.7409@hcd30.00 [120.0000-1022.0000]
15 | 8	1	129	R.VIVM[+15.99492]TTK.E	M4(Oxidation / 15.9949)		2.4e-07	2.5e-07	6.61	486.5	486.5	486.5	2	404.237	404.236	2.81		807.467	807.465	Specific		>sp|SHP2Ca|SHP2 Catalytic (224-528)	1	18.0475	controllerType=0 controllerNumber=1 scan=3078		20250502_vapa_xj08_mlwvi5_shp2_dml189_ethcd_01.ScanId;v=1;d1=3078.3078.2	ethcd	0	0	0	0	2.8e-08	2.8e-08	FTMS + c NSI d sa Full ms2 404.2364@etd150.00 404.2364@hcd30.00 [120.0000-819.0000]
16 | 223	1	144	K.C[+2022.96153]VK.Y	C1(Disulfide / 2022.9615)		9.7e-06	9.8e-06	5.01	519.4	477.6	477.6	4	593.795	593.793	3.36		2372.16	2372.15	Specific		>sp|SHP2Ca|SHP2 Catalytic (224-528)	1	19.7117	controllerType=0 controllerNumber=1 scan=3489		20250502_vapa_xj08_mlwvi5_shp2_dml189_ethcd_01.ScanId;v=1;d1=3489.3489.4	ethcd	0	0	0	0	1.3e-06	1.4e-06	FTMS + c NSI d sa Full ms2 594.0464@etd57.77 594.0464@hcd30.00 [120.0000-2000.0000]		K.QESIMDAGPVVVHCSAGIGR.T	144	(self)	240	93.1
17 | 121	1	147	K.YWPDEYALK.E			6.4e-10	6.4e-10	9.2	653.7	502.2	502.2	2	592.786	592.785	2		1184.56	1184.56	Specific		>sp|SHP2Ca|SHP2 Catalytic (224-528)	1	21.5052	controllerType=0 controllerNumber=1 scan=3928		20250502_vapa_xj08_mlwvi5_shp2_dml189_ethcd_01.ScanId;v=1;d1=3928.3928.2	ethcd	0	0	0	0	7.3e-11	7.4e-11	FTMS + c NSI d sa Full ms2 592.7861@etd150.00 592.7861@hcd30.00 [120.0000-1196.0000]
18 | 219	1	167	K.ESAAHDYTLRELK.L			0.00058	0.00059	3.24	476.5	452.9	452.9	3	511.596	511.595	2.99		1532.77	1532.77	Specific		>sp|SHP2Ca|SHP2 Catalytic (224-528)	1	18.853	controllerType=0 controllerNumber=1 scan=3287		20250502_vapa_xj08_mlwvi5_shp2_dml189_ethcd_01.ScanId;v=1;d1=3287.3287.3	ethcd	0	0	0	0	4.8e-05	4.9e-05	FTMS + c NSI d sa Full ms2 511.5970@etd102.69 511.5970@hcd30.00 [120.0000-1545.0000]
19 | 27	1	167	K.ESAAHDYTLR.E			1.5e-10	1.5e-10	9.83	723	723	723	2	581.779	581.778	1.49		1162.55	1162.55	Specific		>sp|SHP2Ca|SHP2 Catalytic (224-528)	1	18.2825	controllerType=0 controllerNumber=1 scan=3144		20250502_vapa_xj08_mlwvi5_shp2_dml189_ethcd_01.ScanId;v=1;d1=3144.3144.2	ethcd	0	0	0	0	1.3e-11	1.4e-11	FTMS + c NSI d sa Full ms2 581.7796@etd150.00 581.7796@hcd30.00 [120.0000-1174.0000]
20 | 99	1	195	R.TVWQYHFR.T			6e-07	6.1e-07	6.22	530.8	389.1	389.1	2	568.787	568.785	1.88		1136.57	1136.56	Specific		>sp|SHP2Ca|SHP2 Catalytic (224-528)	1	20.5622	controllerType=0 controllerNumber=1 scan=3683		20250502_vapa_xj08_mlwvi5_shp2_dml189_ethcd_01.ScanId;v=1;d1=3683.3683.2	ethcd	0	0	0	0	7.7e-08	7.8e-08	FTMS + c NSI d sa Full ms2 568.7874@etd150.00 568.7874@hcd30.00 [120.0000-1148.0000]
21 | 410	1	203	R.TWPDHGVPSDPGGVLDFLEEVHHK.Q			9.9e-31	8.6e-21	30.01	1114.3	1114.3	1114.3	4	667.826	667.825	1.19		2668.28	2668.28	Specific		>sp|SHP2Ca|SHP2 Catalytic (224-528)	1	22.9281	controllerType=0 controllerNumber=1 scan=4310		20250502_vapa_xj08_mlwvi5_shp2_dml189_ethcd_01.ScanId;v=1;d1=4310.4310.4	ethcd	0	0	0	0	9.9e-31	2.5e-21	FTMS + c NSI d sa Full ms2 668.0764@etd57.77 668.0764@hcd30.00 [120.0000-2000.0000]
22 | 231	1	227	K.QESIM[+15.99492]DAGPVVVHC[+57.02146]SAGIGR.T	M5(Oxidation / 15.9949); C14(Carbamidomethyl / 57.0215)		2.3e-11	2.4e-11	10.63	720.5	720.5	720.5	3	700.34	700.338	1.75		2099	2099	Specific		>sp|SHP2Ca|SHP2 Catalytic (224-528)	1	19.8424	controllerType=0 controllerNumber=1 scan=3518		20250502_vapa_xj08_mlwvi5_shp2_dml189_ethcd_01.ScanId;v=1;d1=3518.3518.3	ethcd	0	0	0	0	1.9e-12	1.9e-12	FTMS + c NSI d sa Full ms2 700.6748@etd102.69 700.6748@hcd30.00 [120.0000-2000.0000]
23 | 249	1	227	K.QESIMDAGPVVVHC[+57.02146]SAGIGR.T	C14(Carbamidomethyl / 57.0215)		1.6e-13	1.6e-13	12.81	878.2	878.2	878.2	2	1042.01	1042.01	0.5		2083.01	2083.01	Specific		>sp|SHP2Ca|SHP2 Catalytic (224-528)	1	20.914	controllerType=0 controllerNumber=1 scan=3769		20250502_vapa_xj08_mlwvi5_shp2_dml189_ethcd_01.ScanId;v=1;d1=3769.3769.2	ethcd	0	0	0	0	1.7e-14	1.7e-14	FTMS + c NSI d sa Full ms2 1042.5088@etd150.00 1042.5088@hcd30.00 [120.0000-2000.0000]
24 | 554	1	247	R.TGTFIVIDILIDIIREK.G			1.8e-10	1.9e-10	9.74	716.8	716.8	716.8	3	653.724	653.722	1.92		1959.16	1959.15	Specific		>sp|SHP2Ca|SHP2 Catalytic (224-528)	1	27.3303	controllerType=0 controllerNumber=1 scan=5203		20250502_vapa_xj08_mlwvi5_shp2_dml189_ethcd_01.ScanId;v=1;d1=5203.5203.3	ethcd	0	0	0	0	2e-11	2e-11	FTMS + c NSI d sa Full ms2 654.0583@etd102.69 654.0583@hcd30.00 [120.0000-1973.0000]
25 | 595	1	247	R.TGTFIVIDILIDIIR.E			6.1e-11	6.2e-11	10.22	713.6	668.2	668.2	2	851.513	851.511	2.3		1702.02	1702.01	Specific		>sp|SHP2Ca|SHP2 Catalytic (224-528)	1	28.3122	controllerType=0 controllerNumber=1 scan=5375		20250502_vapa_xj08_mlwvi5_shp2_dml189_ethcd_01.ScanId;v=1;d1=5375.5375.2	ethcd	0	0	0	0	4.4e-12	4.5e-12	FTMS + c NSI d sa Full ms2 851.5146@etd150.00 851.5146@hcd30.00 [120.0000-1714.0000]
26 | 67	1	264	K.GVDC[+57.02146]DIDVPK.T	C4(Carbamidomethyl / 57.0215)		8.5e-11	8.6e-11	10.07	650.5	619.8	619.8	2	559.265	559.263	2.67		1117.52	1117.52	Specific		>sp|SHP2Ca|SHP2 Catalytic (224-528)	1	19.3452	controllerType=0 controllerNumber=1 scan=3402		20250502_vapa_xj08_mlwvi5_shp2_dml189_ethcd_01.ScanId;v=1;d1=3402.3402.2	ethcd	0	0	0	0	7.8e-12	7.9e-12	FTMS + c NSI d sa Full ms2 559.2649@etd150.00 559.2649@hcd30.00 [120.0000-1129.0000]
27 | 90	1	264	K.GVDCDIDVPK.T			5.2e-07	5.3e-07	6.28	390	390	390	2	530.754	530.753	3.37		1060.5	1060.5	Specific		>sp|SHP2Ca|SHP2 Catalytic (224-528)	1	20.1676	controllerType=0 controllerNumber=1 scan=3590		20250502_vapa_xj08_mlwvi5_shp2_dml189_ethcd_01.ScanId;v=1;d1=3590.3590.2	ethcd	0	0	0	0	6.8e-08	6.9e-08	FTMS + c NSI d sa Full ms2 530.7538@etd150.00 530.7538@hcd30.00 [120.0000-1072.0000]
28 | 12	1	283	R.SGM[+15.99492]VQTEAQYR.F	M3(Oxidation / 15.9949)		2.5e-06	2.5e-06	5.61	542.9	444.7	444.7	2	643.298	643.296	3.34		1285.59	1285.58	Specific		>sp|SHP2Ca|SHP2 Catalytic (224-528)	1	18.1339	controllerType=0 controllerNumber=1 scan=3100		20250502_vapa_xj08_mlwvi5_shp2_dml189_ethcd_01.ScanId;v=1;d1=3100.3100.2	ethcd	0	0	0	0	3.4e-07	3.5e-07	FTMS + c NSI d sa Full ms2 643.2969@etd150.00 643.2969@hcd30.00 [120.0000-1297.0000]
29 | 44	1	283	R.SGMVQTEAQYR.F			9.1e-13	9.2e-13	12.04	803.9	729	729	2	635.298	635.298	0.44		1269.59	1269.59	Specific		>sp|SHP2Ca|SHP2 Catalytic (224-528)	1	18.6455	controllerType=0 controllerNumber=1 scan=3232		20250502_vapa_xj08_mlwvi5_shp2_dml189_ethcd_01.ScanId;v=1;d1=3232.3232.2	ethcd	0	0	0	0	9.4e-14	9.6e-14	FTMS + c NSI d sa Full ms2 635.2994@etd150.00 635.2994@hcd30.00 [120.0000-1281.0000]
SHP1, DML189, EThcD				Injection 1																SHP2, DML189, EThcD
PID	Prot._x000D_ Rank	Pos.	Sequence_x000D_ (unformatted)	Mods_x000D_ (variable)	Glycans	PEP_x000D_ 2D	PEP_x000D_ 1D	|Log Prob|	Score	Delta_x000D_ Score	Delta Mod._x000D_ Score	z	Obs._x000D_ m/z	Calc._x000D_ m/z	ppm_x000D_ err.	Off-_x000D_ By-X	Obs._x000D_ MH	Calc._x000D_ MH	Cleavage	Glycans_x000D_ Pos.	Protein_x000D_ Name	Prot._x000D_ Id	Scan_x000D_ Time	Scan #	Mods_x000D_ (fixed)	Comment	Fragment_x000D_ Type	FDR_x000D_ 2D	FDR_x000D_ 1D	FDR uniq._x000D_ 2D	FDR uniq._x000D_ 1D	q-value_x000D_ 2D	q-value_x000D_ 1D	Scan info	MobilityValue	Xlink Partner Peptide_x000D_ Sequence	Xlink Base Peptide_x000D_ Xlink Pos. in Protein	Xlink Partner Peptide_x000D_ Protein Name	Xlink Partner Peptide_x000D_ Xlink Pos. in Protein	Xlink Score	XlinkPartnerPeptideSequenceUnformatted
1 | 187	1	1	-.GFWEEFESLQK.Q			6.6e-06	6.7e-06	5.18	553.5	553.5	553.5	2	700.331	700.33	1.76		1399.66	1399.65	Specific		>sp|SHP1Ca|SHP1 Catalytic (245-543)	1	23.716	controllerType=0 controllerNumber=1 scan=4775		20231205_vapa_xj04_mlwiii153_b.ScanId;v=1;d1=4775.4775.2	ethcd	0	0	0	0	7.4e-07	7.5e-07	FTMS + c NSI d sa Full ms2 700.3312@etd123.41 700.3312@hcd35.00 [120.0000-1411.0000]
2 | 2	1	21	R.LEGQRPENK.G			0.0011	0.0011	2.97	486.2	286.5	286.5	2	535.784	535.783	1.81		1070.56	1070.56	Specific		>sp|SHP1Ca|SHP1 Catalytic (245-543)	1	16.7189	controllerType=0 controllerNumber=1 scan=2948		20231205_vapa_xj04_mlwiii153_b.ScanId;v=1;d1=2948.2948.2	ethcd	0	0	0	0	4.4e-05	4.5e-05	FTMS + c NSI d sa Full ms2 535.7845@etd123.41 535.7845@hcd35.00 [120.0000-1082.0000]
3 | 126	1	36	K.NILPFDHSR.V			4.6e-05	4.6e-05	4.34	477.2	400.5	400.5	2	549.788	549.788	0.06		1098.57	1098.57	Specific		>sp|SHP1Ca|SHP1 Catalytic (245-543)	1	20.6231	controllerType=0 controllerNumber=1 scan=3819		20231205_vapa_xj04_mlwiii153_b.ScanId;v=1;d1=3819.3819.2	ethcd	0	0	0	0	5.1e-06	5.2e-06	FTMS + c NSI d sa Full ms2 549.7897@etd123.41 549.7897@hcd35.00 [120.0000-1110.0000]
4 | 137	1	51	R.DSNIPGSDYINANYIK.N			3e-09	3.1e-09	8.52	717.7	717.7	717.7	2	892.429	892.428	1.06		1783.85	1783.85	Specific		>sp|SHP1Ca|SHP1 Catalytic (245-543)	1	21.2916	controllerType=0 controllerNumber=1 scan=3983		20231205_vapa_xj04_mlwiii153_b.ScanId;v=1;d1=3983.3983.2	ethcd	0	0	0	0	3e-10	3e-10	FTMS + c NSI d sa Full ms2 893.4326@etd123.41 893.4326@hcd35.00 [120.0000-1797.0000]
5 | 31	1	67	K.NQLLGPDENAK.T			5.8e-10	5.8e-10	9.24	714	549.8	549.8	2	599.807	599.807	1.02		1198.61	1198.61	Specific		>sp|SHP1Ca|SHP1 Catalytic (245-543)	1	18.6171	controllerType=0 controllerNumber=1 scan=3339		20231205_vapa_xj04_mlwiii153_b.ScanId;v=1;d1=3339.3339.2	ethcd	0	0	0	0	4.4e-11	4.5e-11	FTMS + c NSI d sa Full ms2 599.8076@etd123.41 599.8076@hcd35.00 [120.0000-1210.0000]
6 | 474	1	78	K.TYIASQGC[+57.02146]LEATVNDFWQMAWQENSR.V	C8(Carbamidomethyl / 57.0215)		1.5e-13	1.5e-13	12.82	992.4	992.4	992.4	3	1035.8	1035.8	2.65		3105.39	3105.38	Specific		>sp|SHP1Ca|SHP1 Catalytic (245-543)	1	25.5672	controllerType=0 controllerNumber=1 scan=5254		20231205_vapa_xj04_mlwiii153_b.ScanId;v=1;d1=5254.5254.3	ethcd	0	0	0	0	1.5e-14	1.6e-14	FTMS + c NSI d sa Full ms2 1036.1346@etd54.85 1036.1346@hcd35.00 [120.0000-2000.0000]
7 | 13	1	104	R.VIVM[+15.99492]TTR.E	M4(Oxidation / 15.9949)		0.0073	0.0074	2.13	343.9	240	240	2	418.239	418.239	0.84		835.471	835.471	Specific		>sp|SHP1Ca|SHP1 Catalytic (245-543)	1	17.52	controllerType=0 controllerNumber=1 scan=3111		20231205_vapa_xj04_mlwiii153_b.ScanId;v=1;d1=3111.3111.2	ethcd	0	0	0	0	0.00053	0.00054	FTMS + c NSI d sa Full ms2 418.2395@etd123.41 418.2395@hcd35.00 [120.0000-847.0000]
8 | 29	1	104	R.VIVMTTR.E			0.00044	0.00045	3.36	417.7	282.9	282.9	2	410.242	410.241	0.46		819.476	819.476	Specific		>sp|SHP1Ca|SHP1 Catalytic (245-543)	1	18.5832	controllerType=0 controllerNumber=1 scan=3333		20231205_vapa_xj04_mlwiii153_b.ScanId;v=1;d1=3333.3333.2	ethcd	0	0	0	0	2.7e-05	2.7e-05	FTMS + c NSI d sa Full ms2 410.2419@etd123.41 410.2419@hcd35.00 [120.0000-831.0000]
9 | 152	1	119	K.C[+57.02146]VPYWPEVGMQR.A	C1(Carbamidomethyl / 57.0215)		8.6e-06	8.8e-06	5.06	472	472	472	2	761.354	761.352	1.5		1521.7	1521.7	Specific		>sp|SHP1Ca|SHP1 Catalytic (245-543)	1	22.1729	controllerType=0 controllerNumber=1 scan=4295		20231205_vapa_xj04_mlwiii153_b.ScanId;v=1;d1=4295.4295.2	ethcd	0	0	0	0	1.2e-06	1.2e-06	FTMS + c NSI d sa Full ms2 761.3530@etd123.41 761.3530@hcd35.00 [120.0000-1533.0000]
10 | 85	1	131	R.AYGPYSVTNC[+57.02146]GEHDTTEYK.L	C10(Carbamidomethyl / 57.0215)		3.7e-10	3.8e-10	9.43	731.4	731.4	731.4	3	731.313	731.313	0.28		2191.92	2191.92	Specific		>sp|SHP1Ca|SHP1 Catalytic (245-543)	1	19.0076	controllerType=0 controllerNumber=1 scan=3432		20231205_vapa_xj04_mlwiii153_b.ScanId;v=1;d1=3432.3432.3	ethcd	0	0	0	0	2.7e-11	2.7e-11	FTMS + c NSI d sa Full ms2 731.6479@etd54.85 731.6479@hcd35.00 [120.0000-2000.0000]
11 | 141	1	152	R.TLQVSPLDNGDLIR.E			1.7e-08	1.7e-08	7.78	665.5	513.9	513.9	2	770.921	770.92	1.26		1540.83	1540.83	Specific		>sp|SHP1Ca|SHP1 Catalytic (245-543)	1	21.7845	controllerType=0 controllerNumber=1 scan=4160		20231205_vapa_xj04_mlwiii153_b.ScanId;v=1;d1=4160.4160.2	ethcd	0	0	0	0	1.3e-09	1.3e-09	FTMS + c NSI d sa Full ms2 770.9208@etd123.41 770.9208@hcd35.00 [120.0000-1552.0000]
12 | 449	1	166	R.EIWHYQYLSWPDHGVPSEPGGVLSFLDQINQR.Q			9.9e-31	8.6e-29	30.01	1616.7	1503.6	1503.6	4	942.713	942.712	2.12		3767.83	3767.82	Specific		>sp|SHP1Ca|SHP1 Catalytic (245-543)	1	24.8023	controllerType=0 controllerNumber=1 scan=5078		20231205_vapa_xj04_mlwiii153_b.ScanId;v=1;d1=5078.5078.4	ethcd	0	0	0	0	9.9e-31	8.6e-29	FTMS + c NSI d sa Full ms2 942.9637@etd30.85 942.9637@hcd35.00 [120.0000-2000.0000]
13 | 469	1	198	R.QESLPHAGPIIVHC[+57.02146]SAGIGRTGTIIVIDMLMENISTK.G	C14(Carbamidomethyl / 57.0215)		9.9e-31	1.6e-20	30.01	1241.1	1241.1	1241.1	5	792.618	792.617	1.31		3959.06	3959.06	Specific		>sp|SHP1Ca|SHP1 Catalytic (245-543)	1	25.1096	controllerType=0 controllerNumber=1 scan=5161		20231205_vapa_xj04_mlwiii153_b.ScanId;v=1;d1=5161.5161.5	ethcd	0	0	0	0	9.9e-31	4.9e-21	FTMS + c NSI d sa Full ms2 793.0191@etd19.75 793.0191@hcd35.00 [120.0000-2000.0000]
14 | 103	1	198	R.QESLPHAGPIIVHC[+57.02146]SAGIGR.T	C14(Carbamidomethyl / 57.0215)		9.9e-31	1.9e-21	30.01	1166.2	1166.2	1166.2	4	525.526	525.526	1.07		2099.08	2099.08	Specific		>sp|SHP1Ca|SHP1 Catalytic (245-543)	1	19.9294	controllerType=0 controllerNumber=1 scan=3663		20231205_vapa_xj04_mlwiii153_b.ScanId;v=1;d1=3663.3663.4	ethcd	0	0	0	0	9.9e-31	5.6e-22	FTMS + c NSI d sa Full ms2 525.7769@etd30.85 525.7769@hcd35.00 [120.0000-2000.0000]
15 | 218	1	218	R.TGTIIVIDMLMENISTK.G			1.9e-14	1.9e-14	13.72	972	972	972	3	627.003	627.002	1.11		1878.99	1878.99	Specific		>sp|SHP1Ca|SHP1 Catalytic (245-543)	1	26.0189	controllerType=0 controllerNumber=1 scan=5343		20231205_vapa_xj04_mlwiii153_b.ScanId;v=1;d1=5343.5343.3	ethcd	0	0	0	0	1.9e-15	1.9e-15	FTMS + c NSI d sa Full ms2 627.0034@etd54.85 627.0034@hcd35.00 [120.0000-1892.0000]
16 | 89	1	235	K.GLDC[+57.02146]DIDIQK.T	C4(Carbamidomethyl / 57.0215)		5.8e-09	5.8e-09	8.24	653.9	498.7	498.7	2	588.783	588.782	1.29		1176.56	1176.56	Specific		>sp|SHP1Ca|SHP1 Catalytic (245-543)	1	19.5354	controllerType=0 controllerNumber=1 scan=3555		20231205_vapa_xj04_mlwiii153_b.ScanId;v=1;d1=3555.3555.2	ethcd	0	0	0	0	4.4e-10	4.4e-10	FTMS + c NSI d sa Full ms2 588.7827@etd123.41 588.7827@hcd35.00 [120.0000-1188.0000]
17 | 477	1	254	R.SGMVQTEAQYKFIYVAIAQFIETTKK.K			9.9e-31	5.5e-23	30.01	1310.7	1310.7	1310.7	4	749.398	749.397	1.2		2994.57	2994.56	Specific		>sp|SHP1Ca|SHP1 Catalytic (245-543)	1	25.6278	controllerType=0 controllerNumber=1 scan=5266		20231205_vapa_xj04_mlwiii153_b.ScanId;v=1;d1=5266.5266.4	ethcd	0	0	0	0	9.9e-31	1.8e-23	FTMS + c NSI d sa Full ms2 749.6486@etd30.85 749.6486@hcd35.00 [120.0000-2000.0000]
18 | 492	1	254	R.SGMVQTEAQYKFIYVAIAQFIETTK.K			2.4e-08	2.5e-08	7.61	742.3	742.3	742.3	3	956.164	956.161	3.3		2866.48	2866.47	Specific		>sp|SHP1Ca|SHP1 Catalytic (245-543)	1	26.5139	controllerType=0 controllerNumber=1 scan=5439		20231205_vapa_xj04_mlwiii153_b.ScanId;v=1;d1=5439.5439.3	ethcd	0	0	0	0	1.8e-09	1.8e-09	FTMS + c NSI d sa Full ms2 956.4987@etd54.85 956.4987@hcd35.00 [120.0000-2000.0000]
19 | 12	1	254	R.SGM[+15.99492]VQTEAQYK.F	M3(Oxidation / 15.9949)		1.4e-05	1.4e-05	4.86	480.6	480.6	480.6	2	629.294	629.293	2		1257.58	1257.58	Specific		>sp|SHP1Ca|SHP1 Catalytic (245-543)	1	17.3832	controllerType=0 controllerNumber=1 scan=3082		20231205_vapa_xj04_mlwiii153_b.ScanId;v=1;d1=3082.3082.2	ethcd	0	0	0	0	1.5e-06	1.6e-06	FTMS + c NSI d sa Full ms2 629.2938@etd123.41 629.2938@hcd35.00 [120.0000-1269.0000]
20 | 23	1	254	R.SGMVQTEAQYK.F			8e-08	8.1e-08	7.1	615.5	615.5	615.5	2	621.296	621.295	1.76		1241.59	1241.58	Specific		>sp|SHP1Ca|SHP1 Catalytic (245-543)	1	17.9673	controllerType=0 controllerNumber=1 scan=3201		20231205_vapa_xj04_mlwiii153_b.ScanId;v=1;d1=3201.3201.2	ethcd	0	0	0	0	5.4e-09	5.5e-09	FTMS + c NSI d sa Full ms2 621.2962@etd123.41 621.2962@hcd35.00 [120.0000-1253.0000]
21 | 191	1	265	K.FIYVAIAQFIETTKK.K			6.5e-10	6.6e-10	9.19	779	678.8	678.8	3	591.338	591.338	0.01		1772	1772	Specific		>sp|SHP1Ca|SHP1 Catalytic (245-543)	1	24.3129	controllerType=0 controllerNumber=1 scan=4944		20231205_vapa_xj04_mlwiii153_b.ScanId;v=1;d1=4944.4944.3	ethcd	0	0	0	0	8e-11	8.1e-11	FTMS + c NSI d sa Full ms2 591.6725@etd54.85 591.6725@hcd35.00 [120.0000-1786.0000]
22 | 209	1	265	K.FIYVAIAQFIETTK.K			1.8e-12	1.8e-12	11.75	897.5	764.7	764.7	3	548.64	548.64	1.49		1643.91	1643.9	Specific		>sp|SHP1Ca|SHP1 Catalytic (245-543)	1	25.14	controllerType=0 controllerNumber=1 scan=5168		20231205_vapa_xj04_mlwiii153_b.ScanId;v=1;d1=5168.5168.3	ethcd	0	0	0	0	3.6e-13	3.6e-13	FTMS + c NSI d sa Full ms2 548.6403@etd54.85 548.6403@hcd35.00 [120.0000-1656.0000]
23 | 45	1	281	K.LEVLQSQK.G			5.4e-05	5.4e-05	4.27	509.8	358.6	358.6	2	472.774	472.774	0.65		944.542	944.541	Specific		>sp|SHP1Ca|SHP1 Catalytic (245-543)	1	18.6884	controllerType=0 controllerNumber=1 scan=3356		20231205_vapa_xj04_mlwiii153_b.ScanId;v=1;d1=3356.3356.2	ethcd	0	0	0	0	6.2e-06	6.3e-06	FTMS + c NSI d sa Full ms2 472.7745@etd123.41 472.7745@hcd35.00 [120.0000-956.0000]
24 | 111	1	289	K.GQESEYGNITY.-			6.4e-06	6.5e-06	5.19	581.1	581.1	581.1	2	630.773	630.773	1.07		1260.54	1260.54	Specific		>sp|SHP1Ca|SHP1 Catalytic (245-543)	1	19.9943	controllerType=0 controllerNumber=1 scan=3679		20231205_vapa_xj04_mlwiii153_b.ScanId;v=1;d1=3679.3679.2	ethcd	0	0	0	0	6.5e-07	6.6e-07	FTMS + c NSI d sa Full ms2 630.7732@etd123.41 630.7732@hcd35.00 [120.0000-1272.0000]
SHP1, DML189, EThcD				Injection 2																SHP2, DML189, EThcD
PID	Prot._x000D_ Rank	Pos.	Sequence_x000D_ (unformatted)	Mods_x000D_ (variable)	Glycans	PEP_x000D_ 2D	PEP_x000D_ 1D	|Log Prob|	Score	Delta_x000D_ Score	Delta Mod._x000D_ Score	z	Obs._x000D_ m/z	Calc._x000D_ m/z	ppm_x000D_ err.	Off-_x000D_ By-X	Obs._x000D_ MH	Calc._x000D_ MH	Cleavage	Glycans_x000D_ Pos.	Protein_x000D_ Name	Prot._x000D_ Id	Scan_x000D_ Time	Scan #	Mods_x000D_ (fixed)	Comment	Fragment_x000D_ Type	FDR_x000D_ 2D	FDR_x000D_ 1D	FDR uniq._x000D_ 2D	FDR uniq._x000D_ 1D	q-value_x000D_ 2D	q-value_x000D_ 1D	Scan info	MobilityValue	Xlink Partner Peptide_x000D_ Sequence	Xlink Base Peptide_x000D_ Xlink Pos. in Protein	Xlink Partner Peptide_x000D_ Protein Name	Xlink Partner Peptide_x000D_ Xlink Pos. in Protein	Xlink Score	XlinkPartnerPeptideSequenceUnformatted
1 | 206	1	1	-.GFWEEFESLQK.Q			5e-10	5.1e-10	9.3	814.6	814.6	814.6	2	700.332	700.33	2.2		1399.66	1399.65	Specific		>sp|SHP1Ca|SHP1 Catalytic (245-543)	1	23.659	controllerType=0 controllerNumber=1 scan=4273		20250502_vapa_xj08_mlwvi5_shp1_dml189_ethcd_01.ScanId;v=1;d1=4273.4273.2	ethcd	0	0	0	0	4.3e-11	4.4e-11	FTMS + c NSI d sa Full ms2 700.3311@etd150.00 700.3311@hcd30.00 [120.0000-1411.0000]
2 | 205	1	2	G.FWEEFESLQK.Q			0.0044	0.0044	2.36	394.8	394.8	394.8	2	671.821	671.819	2.82		1342.64	1342.63	NRagged		>sp|SHP1Ca|SHP1 Catalytic (245-543)	1	22.5027	controllerType=0 controllerNumber=1 scan=3996		20250502_vapa_xj08_mlwvi5_shp1_dml189_ethcd_01.ScanId;v=1;d1=3996.3996.2	ethcd	0	0	0	0	0.00045	0.00045	FTMS + c NSI d sa Full ms2 671.8202@etd150.00 671.8202@hcd30.00 [120.0000-1354.0000]
3 | 7	1	21	R.LEGQRPENKGK.N			0.001	0.001	2.99	476.1	476.1	476.1	3	419.231	419.23	2.53		1255.68	1255.68	Specific		>sp|SHP1Ca|SHP1 Catalytic (245-543)	1	17.3135	controllerType=0 controllerNumber=1 scan=2720		20250502_vapa_xj08_mlwvi5_shp1_dml189_ethcd_01.ScanId;v=1;d1=2720.2720.3	ethcd	0	0	0	0	0.00011	0.00012	FTMS + c NSI d sa Full ms2 419.2310@etd102.69 419.2310@hcd30.00 [120.0000-1268.0000]
4 | 19	1	21	R.LEGQRPENK.G			0.28	0.28	0.56	400.7	243.2	243.2	2	535.784	535.783	2.38		1070.56	1070.56	Specific		>sp|SHP1Ca|SHP1 Catalytic (245-543)	1	17.7775	controllerType=0 controllerNumber=1 scan=2806		20250502_vapa_xj08_mlwvi5_shp1_dml189_ethcd_01.ScanId;v=1;d1=2806.2806.2	ethcd	0	0	0	0	0.019	0.019	FTMS + c NSI d sa Full ms2 535.7853@etd150.00 535.7853@hcd30.00 [120.0000-1082.0000]
5 | 132	1	36	K.NILPFDHSR.V			0.0011	0.0011	2.95	536.2	427.3	427.3	2	549.788	549.788	0.62		1098.57	1098.57	Specific		>sp|SHP1Ca|SHP1 Catalytic (245-543)	1	20.2613	controllerType=0 controllerNumber=1 scan=3420		20250502_vapa_xj08_mlwvi5_shp1_dml189_ethcd_01.ScanId;v=1;d1=3420.3420.2	ethcd	0	0	0	0	0.00016	0.00016	FTMS + c NSI d sa Full ms2 549.7889@etd150.00 549.7889@hcd30.00 [120.0000-1110.0000]
6 | 160	1	51	R.DSNIPGSDYINANYIK.N			1.7e-09	1.8e-09	8.76	757.4	757.4	757.4	2	892.429	892.428	0.58		1783.85	1783.85	Specific		>sp|SHP1Ca|SHP1 Catalytic (245-543)	1	21.6865	controllerType=0 controllerNumber=1 scan=3773		20250502_vapa_xj08_mlwvi5_shp1_dml189_ethcd_01.ScanId;v=1;d1=3773.3773.2	ethcd	0	0	0	0	3.5e-10	3.5e-10	FTMS + c NSI d sa Full ms2 892.9296@etd150.00 892.9296@hcd30.00 [120.0000-1796.0000]
7 | 67	1	67	K.NQLLGPDENAK.T			9.7e-08	9.8e-08	7.01	737.4	602.3	602.3	2	599.809	599.807	3.98		1198.61	1198.61	Specific		>sp|SHP1Ca|SHP1 Catalytic (245-543)	1	18.905	controllerType=0 controllerNumber=1 scan=3071		20250502_vapa_xj08_mlwvi5_shp1_dml189_ethcd_01.ScanId;v=1;d1=3071.3071.2	ethcd	0	0	0	0	9.2e-09	9.3e-09	FTMS + c NSI d sa Full ms2 599.8073@etd150.00 599.8073@hcd30.00 [120.0000-1210.0000]
8 | 36	1	104	R.VIVM[+15.99492]TTR.E	M4(Oxidation / 15.9949)		0.052	0.053	1.28	392	332.8	332.8	2	418.24	418.239	1.64		835.472	835.471	Specific		>sp|SHP1Ca|SHP1 Catalytic (245-543)	1	18.2222	controllerType=0 controllerNumber=1 scan=2914		20250502_vapa_xj08_mlwvi5_shp1_dml189_ethcd_01.ScanId;v=1;d1=2914.2914.2	ethcd	0	0	0	0	0.0021	0.0021	FTMS + c NSI d sa Full ms2 418.2395@etd150.00 418.2395@hcd30.00 [120.0000-847.0000]
9 | 57	1	104	R.VIVMTTR.E			0.18	0.18	0.75	450.4	325.5	325.5	2	410.241	410.241	-0.59		819.475	819.476	Specific		>sp|SHP1Ca|SHP1 Catalytic (245-543)	1	18.8446	controllerType=0 controllerNumber=1 scan=3057		20250502_vapa_xj08_mlwvi5_shp1_dml189_ethcd_01.ScanId;v=1;d1=3057.3057.2	ethcd	0	0	0	0	0.008	0.0081	FTMS + c NSI d sa Full ms2 410.2410@etd150.00 410.2410@hcd30.00 [120.0000-831.0000]
10 | 293	1	119	K.CVPYWPEVGM[+15.99492]QRAYGPYSVTNCGEHDTTEYK.L	M10(Oxidation / 15.9949)		0.0091	0.0092	2.04	422.4	422.4	282.1	5	720.118	720.117	1.4		3596.56	3596.56	Specific		>sp|SHP1Ca|SHP1 Catalytic (245-543)	1	21.3013	controllerType=0 controllerNumber=1 scan=3678		20250502_vapa_xj08_mlwvi5_shp1_dml189_ethcd_01.ScanId;v=1;d1=3678.3678.5	ethcd	0	0	0	0	0.00062	0.00063	FTMS + c NSI d sa Full ms2 720.5189@etd36.97 720.5189@hcd30.00 [120.0000-2000.0000]
11 | 156	1	119	K.C[+57.02146]VPYWPEVGM[+15.99492]QR.A	C1(Carbamidomethyl / 57.0215); M10(Oxidation / 15.9949)		0.00075	0.00076	3.12	472.1	472.1	472.1	2	769.35	769.35	0.42		1537.69	1537.69	Specific		>sp|SHP1Ca|SHP1 Catalytic (245-543)	1	21.5796	controllerType=0 controllerNumber=1 scan=3750		20250502_vapa_xj08_mlwvi5_shp1_dml189_ethcd_01.ScanId;v=1;d1=3750.3750.2	ethcd	0	0	0	0	6.6e-05	6.7e-05	FTMS + c NSI d sa Full ms2 769.3514@etd150.00 769.3514@hcd30.00 [120.0000-1549.0000]
12 | 203	1	119	K.C[+57.02146]VPYWPEVGMQR.A	C1(Carbamidomethyl / 57.0215)		1.9e-07	2e-07	6.71	660.3	660.3	660.3	3	507.905	507.904	1.55		1521.7	1521.7	Specific		>sp|SHP1Ca|SHP1 Catalytic (245-543)	1	22.2313	controllerType=0 controllerNumber=1 scan=3926		20250502_vapa_xj08_mlwvi5_shp1_dml189_ethcd_01.ScanId;v=1;d1=3926.3926.3	ethcd	0	0	0	0	2.1e-08	2.1e-08	FTMS + c NSI d sa Full ms2 507.9041@etd102.69 507.9041@hcd30.00 [120.0000-1534.0000]
13 | 91	1	131	R.AYGPYSVTNC[+57.02146]GEHDTTEYK.L	C10(Carbamidomethyl / 57.0215)		1.4e-12	1.5e-12	11.84	905.9	905.9	905.9	2	1096.47	1096.47	0.57		2191.92	2191.92	Specific		>sp|SHP1Ca|SHP1 Catalytic (245-543)	1	19.301	controllerType=0 controllerNumber=1 scan=3172		20250502_vapa_xj08_mlwvi5_shp1_dml189_ethcd_01.ScanId;v=1;d1=3172.3172.2	ethcd	0	0	0	0	3e-13	3e-13	FTMS + c NSI d sa Full ms2 1096.9683@etd150.00 1096.9683@hcd30.00 [120.0000-2000.0000]
14 | 177	1	152	R.TLQVSPLDNGDLIR.E			1.1e-10	1.1e-10	9.98	844	731.1	731.1	3	514.282	514.283	-0.3		1540.83	1540.83	Specific		>sp|SHP1Ca|SHP1 Catalytic (245-543)	1	21.8117	controllerType=0 controllerNumber=1 scan=3810		20250502_vapa_xj08_mlwvi5_shp1_dml189_ethcd_01.ScanId;v=1;d1=3810.3810.3	ethcd	0	0	0	0	1.8e-11	1.8e-11	FTMS + c NSI d sa Full ms2 514.2826@etd102.69 514.2826@hcd30.00 [120.0000-1553.0000]
15 | 333	1	166	R.EIWHYQYLSWPDHGVPSEPGGVLSFLDQINQR.Q			9.9e-31	7.2e-27	30.01	1574.6	1381	1381	4	942.712	942.712	0.04		3767.82	3767.82	Specific		>sp|SHP1Ca|SHP1 Catalytic (245-543)	1	24.1914	controllerType=0 controllerNumber=1 scan=4421		20250502_vapa_xj08_mlwvi5_shp1_dml189_ethcd_01.ScanId;v=1;d1=4421.4421.4	ethcd	0	0	0	0	9.9e-31	7.2e-27	FTMS + c NSI d sa Full ms2 943.2139@etd57.77 943.2139@hcd30.00 [120.0000-2000.0000]
16 | 355	1	198	R.QESLPHAGPIIVHC[+57.02146]SAGIGRTGTIIVIDMLMENISTK.G	C14(Carbamidomethyl / 57.0215)		1.2e-06	1.2e-06	5.91	697.1	697.1	697.1	5	792.619	792.617	2.54		3959.07	3959.06	Specific		>sp|SHP1Ca|SHP1 Catalytic (245-543)	1	24.3303	controllerType=0 controllerNumber=1 scan=4454		20250502_vapa_xj08_mlwvi5_shp1_dml189_ethcd_01.ScanId;v=1;d1=4454.4454.5	ethcd	0	0	0	0	1.1e-07	1.1e-07	FTMS + c NSI d sa Full ms2 793.0189@etd36.97 793.0189@hcd30.00 [120.0000-2000.0000]
17 | 100	1	198	R.QESLPHAGPIIVHC[+57.02146]SAGIGR.T	C14(Carbamidomethyl / 57.0215)		1.1e-16	1.1e-16	15.96	1155.2	1155.2	1155.2	4	525.526	525.526	0.26		2099.08	2099.08	Specific		>sp|SHP1Ca|SHP1 Catalytic (245-543)	1	19.8355	controllerType=0 controllerNumber=1 scan=3299		20250502_vapa_xj08_mlwvi5_shp1_dml189_ethcd_01.ScanId;v=1;d1=3299.3299.4	ethcd	0	0	0	0	2.7e-17	2.8e-17	FTMS + c NSI d sa Full ms2 525.7767@etd57.77 525.7767@hcd30.00 [120.0000-2000.0000]
18 | 222	1	218	R.TGTIIVIDMLM[+15.99492]ENISTK.G	M11(Oxidation / 15.9949)		1.4e-12	1.5e-12	11.84	929.4	929.4	91.2	3	632.334	632.334	0.95		1894.99	1894.99	Specific		>sp|SHP1Ca|SHP1 Catalytic (245-543)	1	23.9846	controllerType=0 controllerNumber=1 scan=4363		20250502_vapa_xj08_mlwvi5_shp1_dml189_ethcd_01.ScanId;v=1;d1=4363.4363.3	ethcd	0	0	0	0	4.1e-13	4.2e-13	FTMS + c NSI d sa Full ms2 632.3346@etd102.69 632.3346@hcd30.00 [120.0000-1908.0000]
19 | 260	1	218	R.TGTIIVIDMLMENISTK.G			2.6e-13	2.6e-13	12.59	989.3	989.3	989.3	2	939.999	939.999	-0.21		1878.99	1878.99	Specific		>sp|SHP1Ca|SHP1 Catalytic (245-543)	1	25.4024	controllerType=0 controllerNumber=1 scan=4696		20250502_vapa_xj08_mlwvi5_shp1_dml189_ethcd_01.ScanId;v=1;d1=4696.4696.2	ethcd	0	0	0	0	4.9e-14	5e-14	FTMS + c NSI d sa Full ms2 940.0004@etd150.00 940.0004@hcd30.00 [120.0000-1891.0000]
20 | 111	1	235	K.GLDC[+57.02146]DIDIQK.T	C4(Carbamidomethyl / 57.0215)		3.6e-08	3.7e-08	7.44	724.2	538.8	538.8	2	588.782	588.782	0.77		1176.56	1176.56	Specific		>sp|SHP1Ca|SHP1 Catalytic (245-543)	1	19.8748	controllerType=0 controllerNumber=1 scan=3311		20250502_vapa_xj08_mlwvi5_shp1_dml189_ethcd_01.ScanId;v=1;d1=3311.3311.2	ethcd	0	0	0	0	3.3e-09	3.3e-09	FTMS + c NSI d sa Full ms2 588.7821@etd150.00 588.7821@hcd30.00 [120.0000-1188.0000]
21 | 146	1	235	K.GLDCDIDIQK.T			0.0011	0.0011	2.95	512.7	465.8	465.8	2	560.273	560.271	2.43		1119.54	1119.54	Specific		>sp|SHP1Ca|SHP1 Catalytic (245-543)	1	20.9444	controllerType=0 controllerNumber=1 scan=3594		20250502_vapa_xj08_mlwvi5_shp1_dml189_ethcd_01.ScanId;v=1;d1=3594.3594.2	ethcd	0	0	0	0	0.00017	0.00017	FTMS + c NSI d sa Full ms2 560.2715@etd150.00 560.2715@hcd30.00 [120.0000-1131.0000]
22 | 364	1	254	R.SGM[+15.99492]VQTEAQYKFIYVAIAQFIETTKK.K	M3(Oxidation / 15.9949)		7.7e-11	7.8e-11	10.11	876.8	876.8	876.8	4	753.396	753.395	1.58		3010.56	3010.56	Specific		>sp|SHP1Ca|SHP1 Catalytic (245-543)	1	25.0155	controllerType=0 controllerNumber=1 scan=4615		20250502_vapa_xj08_mlwvi5_shp1_dml189_ethcd_01.ScanId;v=1;d1=4615.4615.4	ethcd	0	0	0	0	1.4e-11	1.4e-11	FTMS + c NSI d sa Full ms2 753.6476@etd57.77 753.6476@hcd30.00 [120.0000-2000.0000]
23 | 371	1	254	R.SGMVQTEAQYKFIYVAIAQFIETTKK.K			9.9e-31	7.8e-24	30.01	1405.4	1405.4	1405.4	4	749.398	749.397	1.61		2994.57	2994.56	Specific		>sp|SHP1Ca|SHP1 Catalytic (245-543)	1	25.235	controllerType=0 controllerNumber=1 scan=4657		20250502_vapa_xj08_mlwvi5_shp1_dml189_ethcd_01.ScanId;v=1;d1=4657.4657.4	ethcd	0	0	0	0	9.9e-31	2.8e-24	FTMS + c NSI d sa Full ms2 749.8990@etd57.77 749.8990@hcd30.00 [120.0000-2000.0000]
24 | 380	1	254	R.SGMVQTEAQYKFIYVAIAQFIETTK.K			5.8e-06	5.9e-06	5.24	608.3	608.3	608.3	4	717.374	717.373	1.51		2866.47	2866.47	Specific		>sp|SHP1Ca|SHP1 Catalytic (245-543)	1	26.0433	controllerType=0 controllerNumber=1 scan=4830		20250502_vapa_xj08_mlwvi5_shp1_dml189_ethcd_01.ScanId;v=1;d1=4830.4830.4	ethcd	0	0	0	0	6.8e-07	6.9e-07	FTMS + c NSI d sa Full ms2 717.6240@etd57.77 717.6240@hcd30.00 [120.0000-2000.0000]
25 | 23	1	254	R.SGM[+15.99492]VQTEAQYK.F	M3(Oxidation / 15.9949)		2.4e-11	2.4e-11	10.62	853.4	853.4	853.4	2	629.294	629.293	1.51		1257.58	1257.58	Specific		>sp|SHP1Ca|SHP1 Catalytic (245-543)	1	18.0528	controllerType=0 controllerNumber=1 scan=2870		20250502_vapa_xj08_mlwvi5_shp1_dml189_ethcd_01.ScanId;v=1;d1=2870.2870.2	ethcd	0	0	0	0	3e-12	3e-12	FTMS + c NSI d sa Full ms2 629.2938@etd150.00 629.2938@hcd30.00 [120.0000-1269.0000]
26 | 50	1	254	R.SGMVQTEAQYK.F			1.1e-10	1.2e-10	9.94	827.5	827.5	827.5	2	621.297	621.295	2.25		1241.59	1241.58	Specific		>sp|SHP1Ca|SHP1 Catalytic (245-543)	1	18.4815	controllerType=0 controllerNumber=1 scan=2974		20250502_vapa_xj08_mlwvi5_shp1_dml189_ethcd_01.ScanId;v=1;d1=2974.2974.4	ethcd	0	0	0	0	2.2e-11	2.3e-11	FTMS + c NSI d sa Full ms2 621.0433@etd57.77 621.0433@hcd30.00 [120.0000-2000.0000]
27 | 220	1	265	K.FIYVAIAQFIETTKK.K			5.9e-09	6e-09	8.23	715.9	686.8	686.8	3	591.339	591.338	1.25		1772	1772	Specific		>sp|SHP1Ca|SHP1 Catalytic (245-543)	1	23.9136	controllerType=0 controllerNumber=1 scan=4341		20250502_vapa_xj08_mlwvi5_shp1_dml189_ethcd_01.ScanId;v=1;d1=4341.4341.3	ethcd	0	0	0	0	5.9e-10	5.9e-10	FTMS + c NSI d sa Full ms2 591.6730@etd102.69 591.6730@hcd30.00 [120.0000-1786.0000]
28 | 246	1	265	K.FIYVAIAQFIETTK.K			6.8e-13	6.9e-13	12.17	907.7	789.7	789.7	3	548.641	548.64	1.94		1643.91	1643.9	Specific		>sp|SHP1Ca|SHP1 Catalytic (245-543)	1	24.7091	controllerType=0 controllerNumber=1 scan=4544		20250502_vapa_xj08_mlwvi5_shp1_dml189_ethcd_01.ScanId;v=1;d1=4544.4544.3	ethcd	0	0	0	0	1.5e-13	1.6e-13	FTMS + c NSI d sa Full ms2 548.6409@etd102.69 548.6409@hcd30.00 [120.0000-1656.0000]
29 | 40	1	280	K.KLEVLQSQK.G			1.1e-07	1.1e-07	6.97	722.2	506.1	506.1	2	536.823	536.822	2.91		1072.64	1072.64	Specific		>sp|SHP1Ca|SHP1 Catalytic (245-543)	1	18.3684	controllerType=0 controllerNumber=1 scan=2947		20250502_vapa_xj08_mlwvi5_shp1_dml189_ethcd_01.ScanId;v=1;d1=2947.2947.2	ethcd	0	0	0	0	1.3e-08	1.4e-08	FTMS + c NSI d sa Full ms2 536.8223@etd150.00 536.8223@hcd30.00 [120.0000-1084.0000]
30 | 63	1	281	K.LEVLQSQK.G			0.0006	0.00061	3.22	539.9	423.3	423.3	2	472.775	472.774	1.04		944.542	944.541	Specific		>sp|SHP1Ca|SHP1 Catalytic (245-543)	1	18.897	controllerType=0 controllerNumber=1 scan=3069		20250502_vapa_xj08_mlwvi5_shp1_dml189_ethcd_01.ScanId;v=1;d1=3069.3069.2	ethcd	0	0	0	0	5.4e-05	5.4e-05	FTMS + c NSI d sa Full ms2 472.7744@etd150.00 472.7744@hcd30.00 [120.0000-956.0000]
31 | 142	1	289	K.GQESEYGNITY.-			1.9e-06	1.9e-06	5.72	642.4	642.4	642.4	2	630.773	630.773	0.78		1260.54	1260.54	Specific		>sp|SHP1Ca|SHP1 Catalytic (245-543)	1	20.8689	controllerType=0 controllerNumber=1 scan=3574		20250502_vapa_xj08_mlwvi5_shp1_dml189_ethcd_01.ScanId;v=1;d1=3574.3574.2	ethcd	0	0	0	0	2e-07	2e-07	FTMS + c NSI d sa Full ms2 630.7739@etd150.00 630.7739@hcd30.00 [120.0000-1272.0000]
32 | 97	1	289	K.GQESEYGNIT.Y			0.00079	0.0008	3.1	522.3	522.3	522.3	2	549.241	549.241	1.09		1097.48	1097.47	CRagged		>sp|SHP1Ca|SHP1 Catalytic (245-543)	1	19.5411	controllerType=0 controllerNumber=1 scan=3230		20250502_vapa_xj08_mlwvi5_shp1_dml189_ethcd_01.ScanId;v=1;d1=3230.3230.2	ethcd	0	0	0	0	7.3e-05	7.4e-05	FTMS + c NSI d sa Full ms2 549.2425@etd150.00 549.2425@hcd30.00 [120.0000-1109.0000]
